# Supplementary material for: The Alpha Variant (B.1.1.7) of SARS-CoV-2 Failed to Become Dominant in Mexico
Source: PubMed Central journal article supplement (PMC9045257; doi:10.1128/spectrum.02240-21), 2022-04-07
Supplement: spectrum02240-21_supp_1_seq8.pdf [file spectrum02240-21_supp_1_seq8.pdf]

# Nation-wide Daily Official New Cases (%)

7-day rolling average by date of confirmation

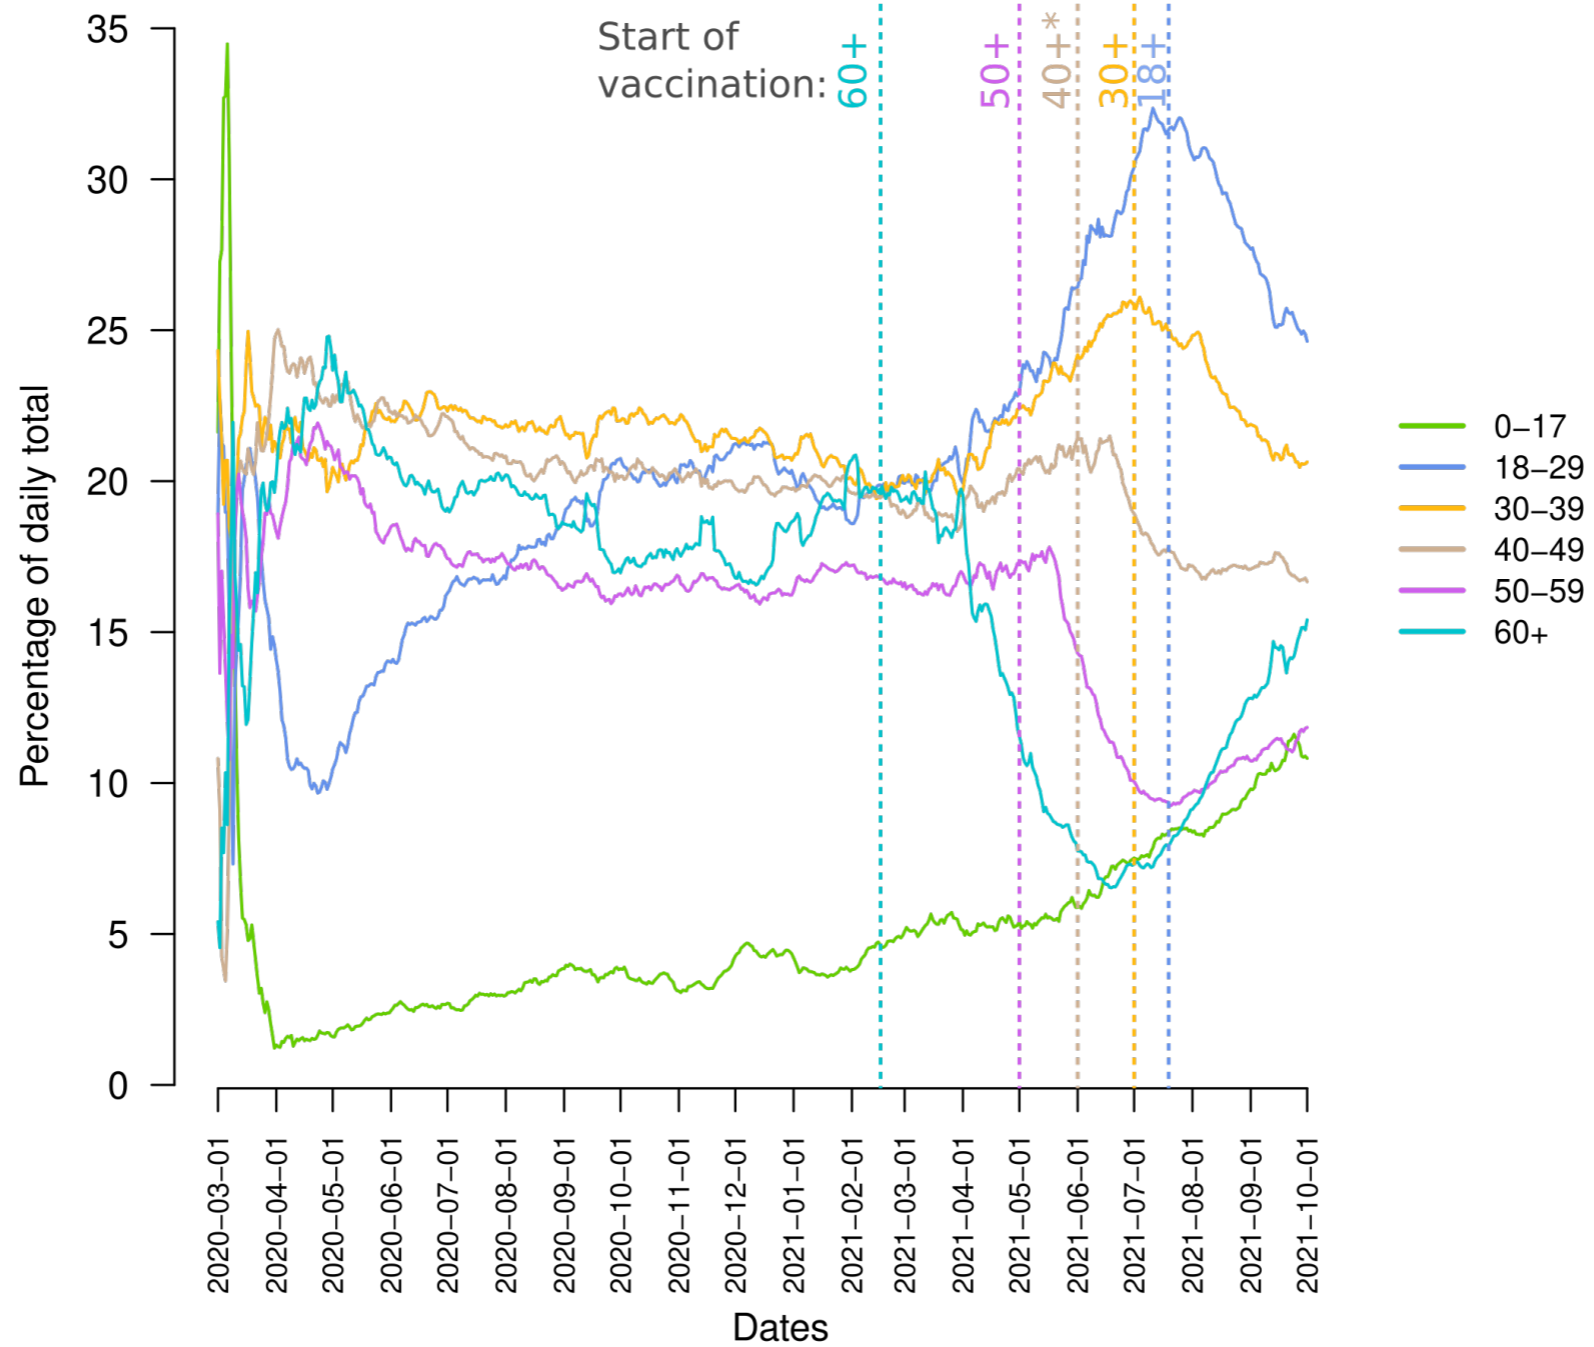

\* 40+ Vaccination started on the same date as 18+ at Northern border States

Figure S1. Distribution of daily new cases by group of age. The weekly rolling average by date of confirmation is shown as a proportion of the number of new cases corresponding to each age group. The stating date of the vaccination campaign for each group is shown in dashed vertical lines.



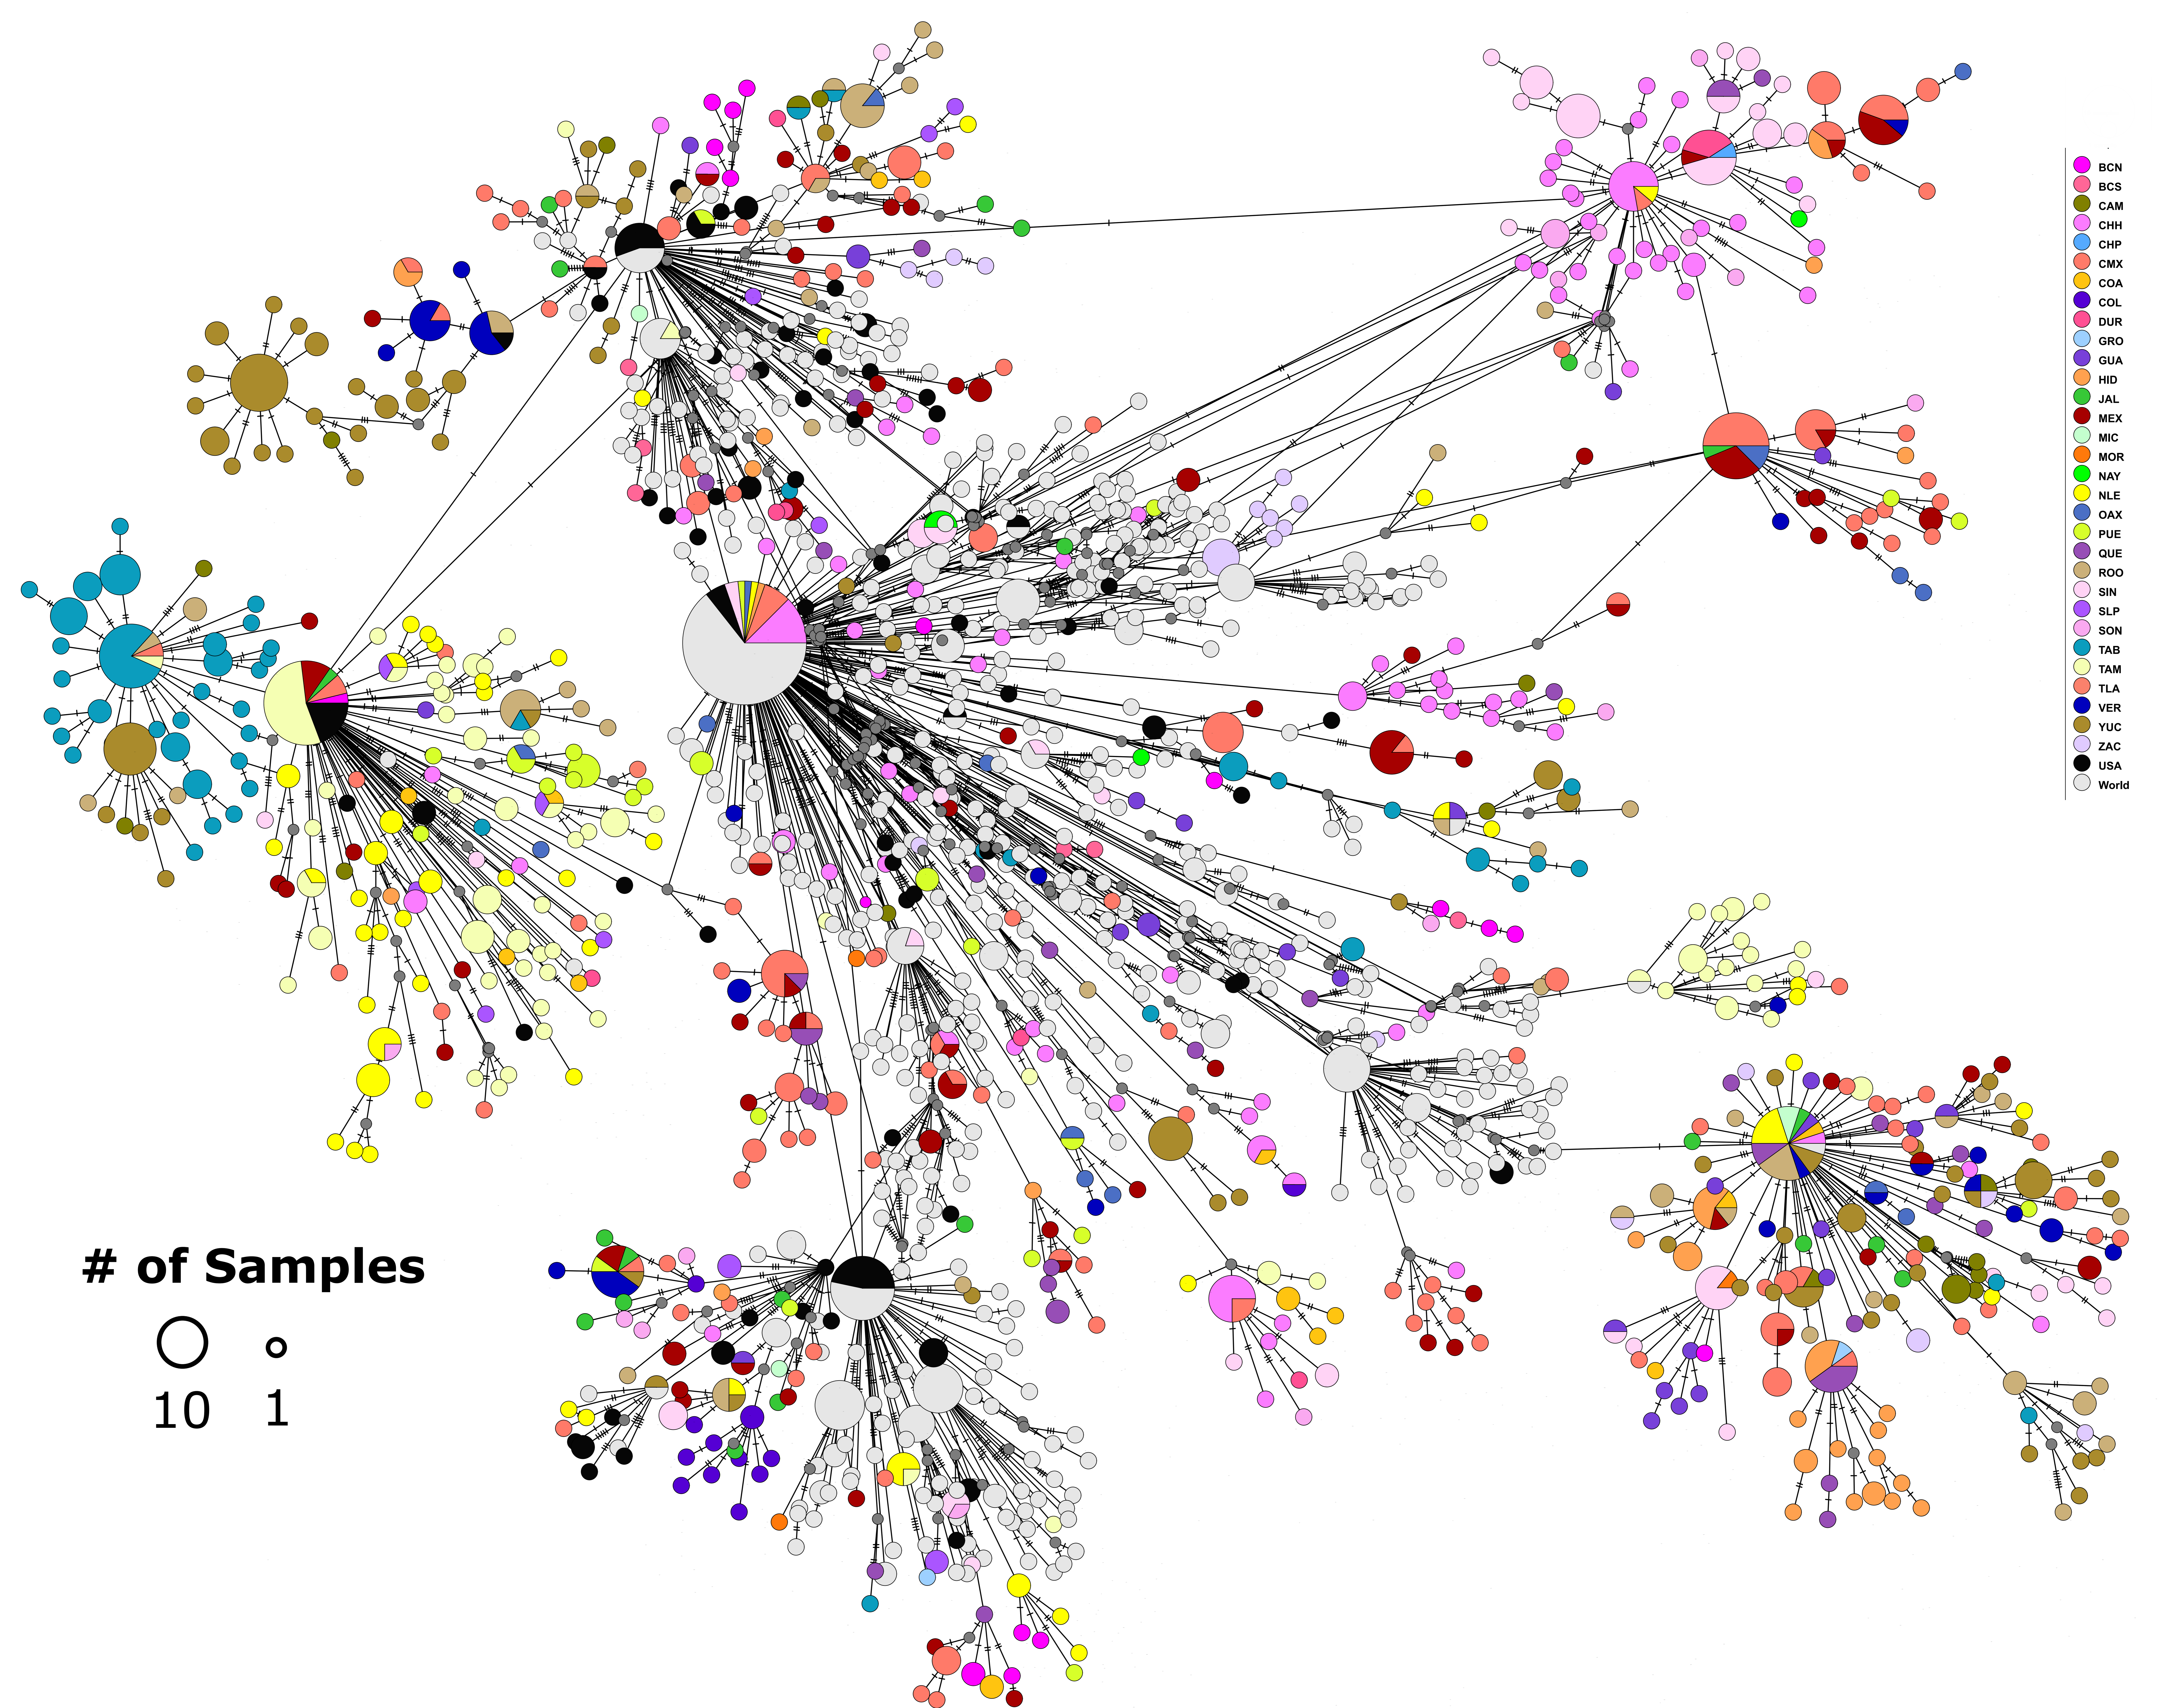

Figure S2. High-resolution haplotype network. The number of mutations are represented by dashes in the connecting lines.



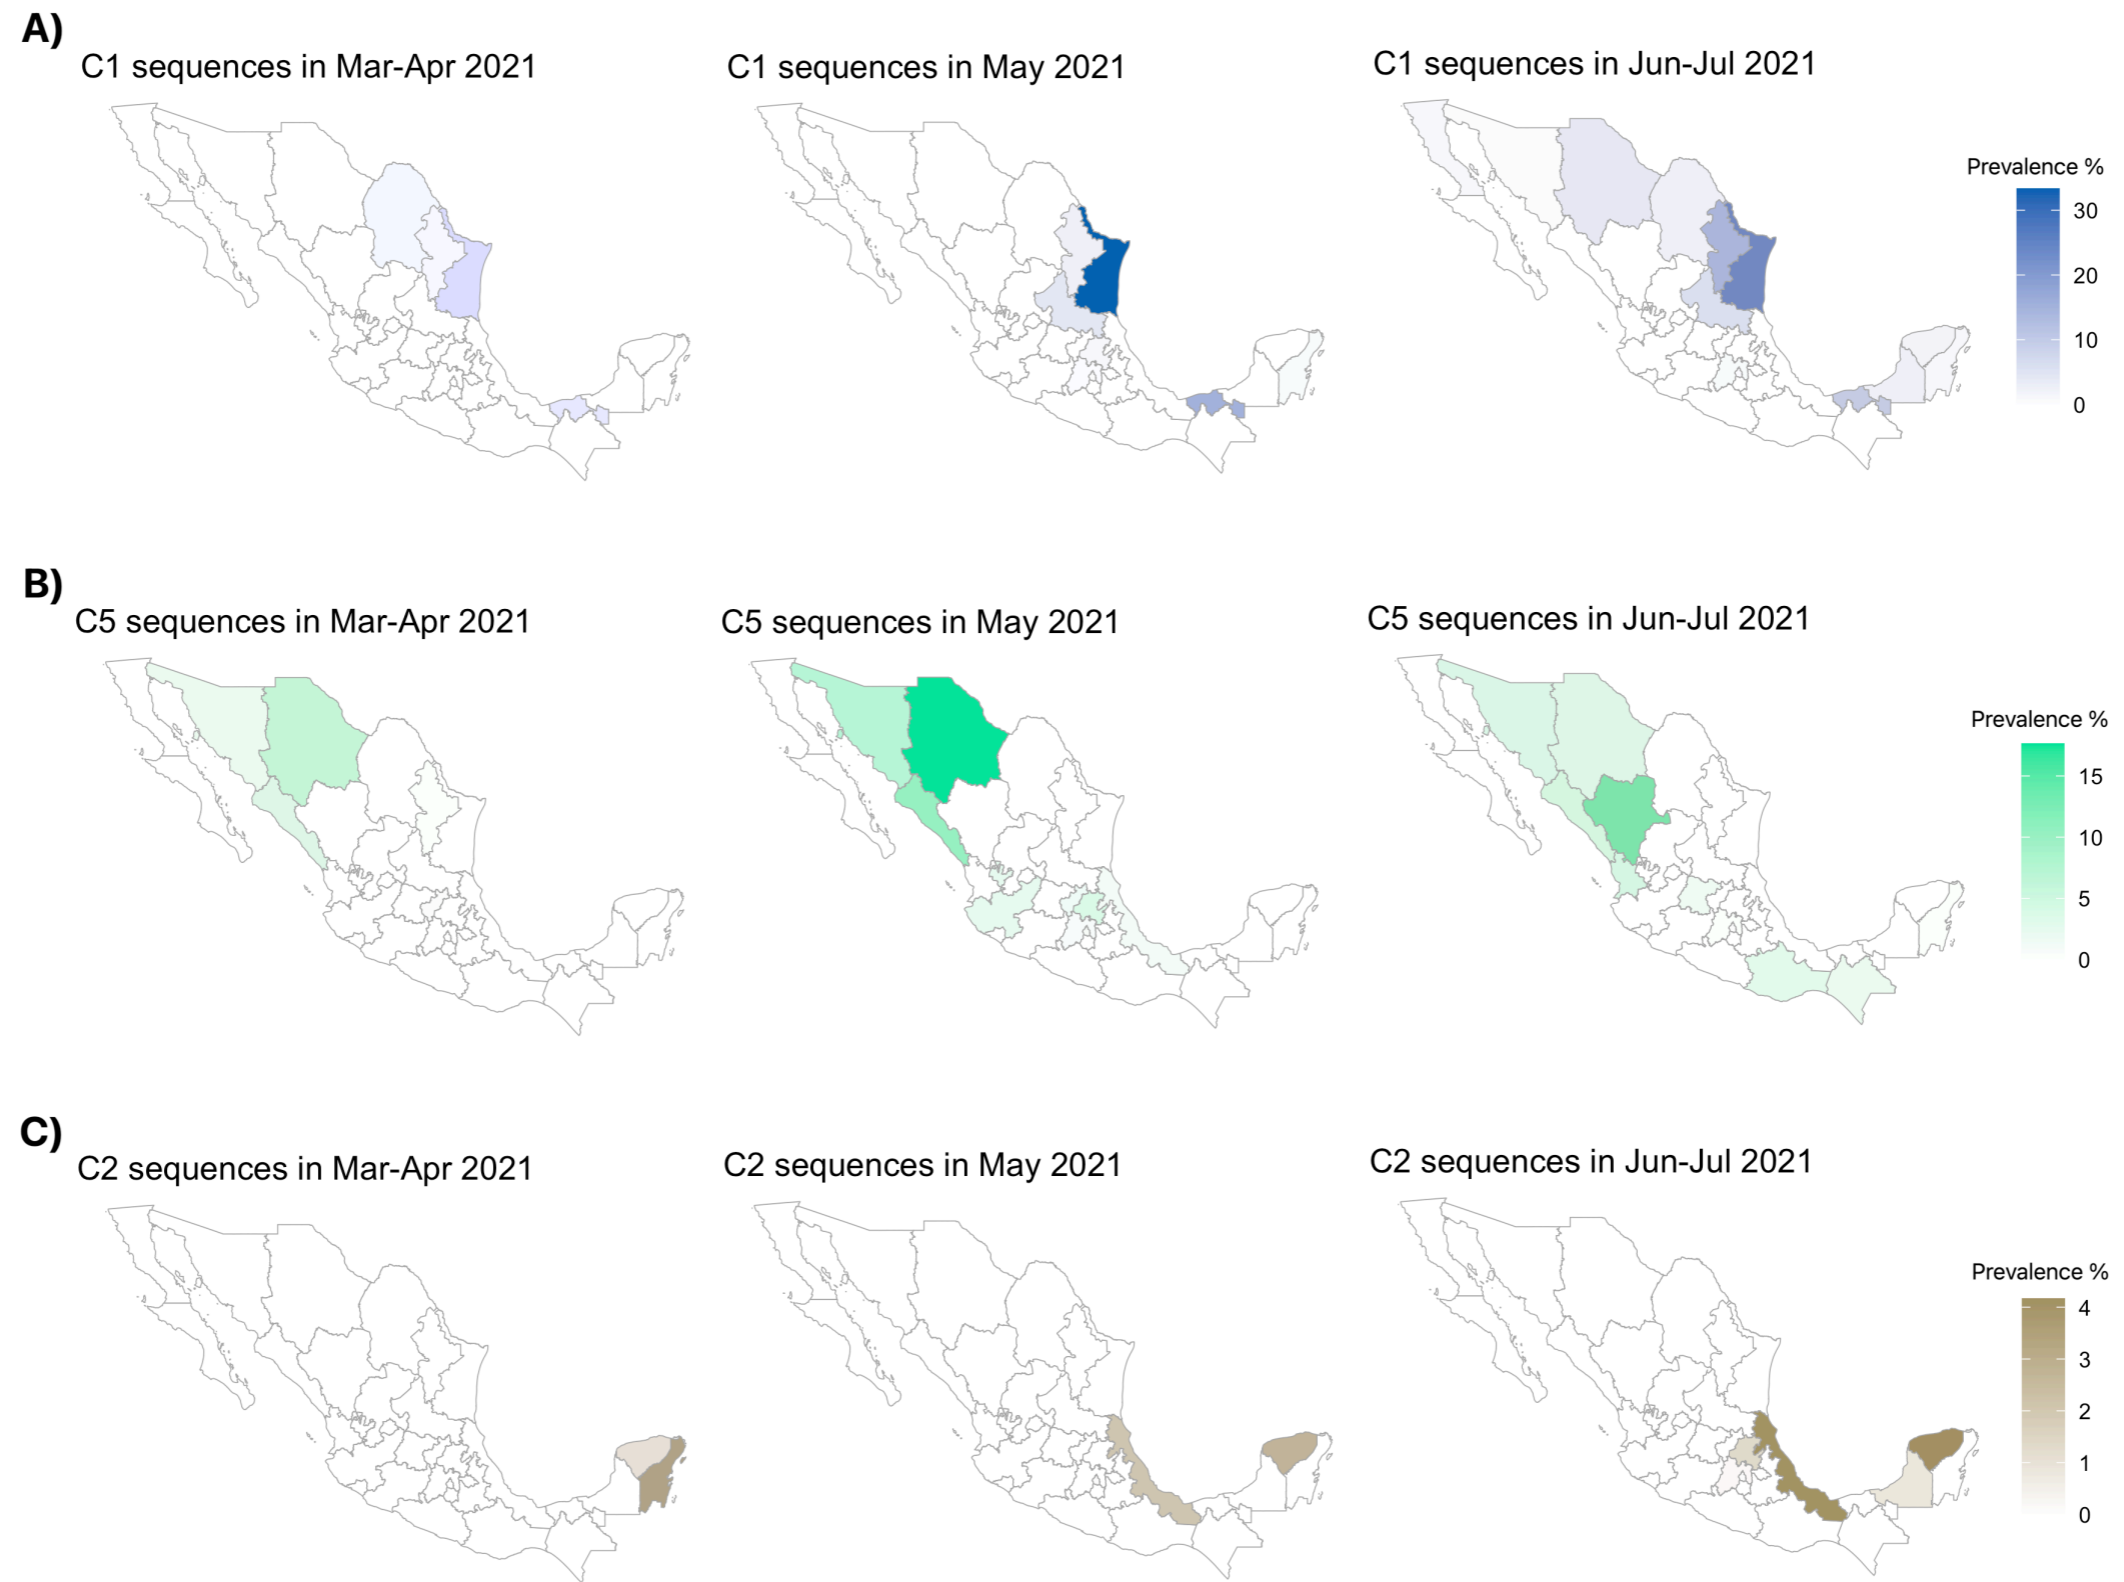

Figure S3 Map series showing the spatiotemporal distribution of B.1.1.7 sequences from different clusters. A) Sequences in C1. B) Sequences in C5. C) Sequences in C2.

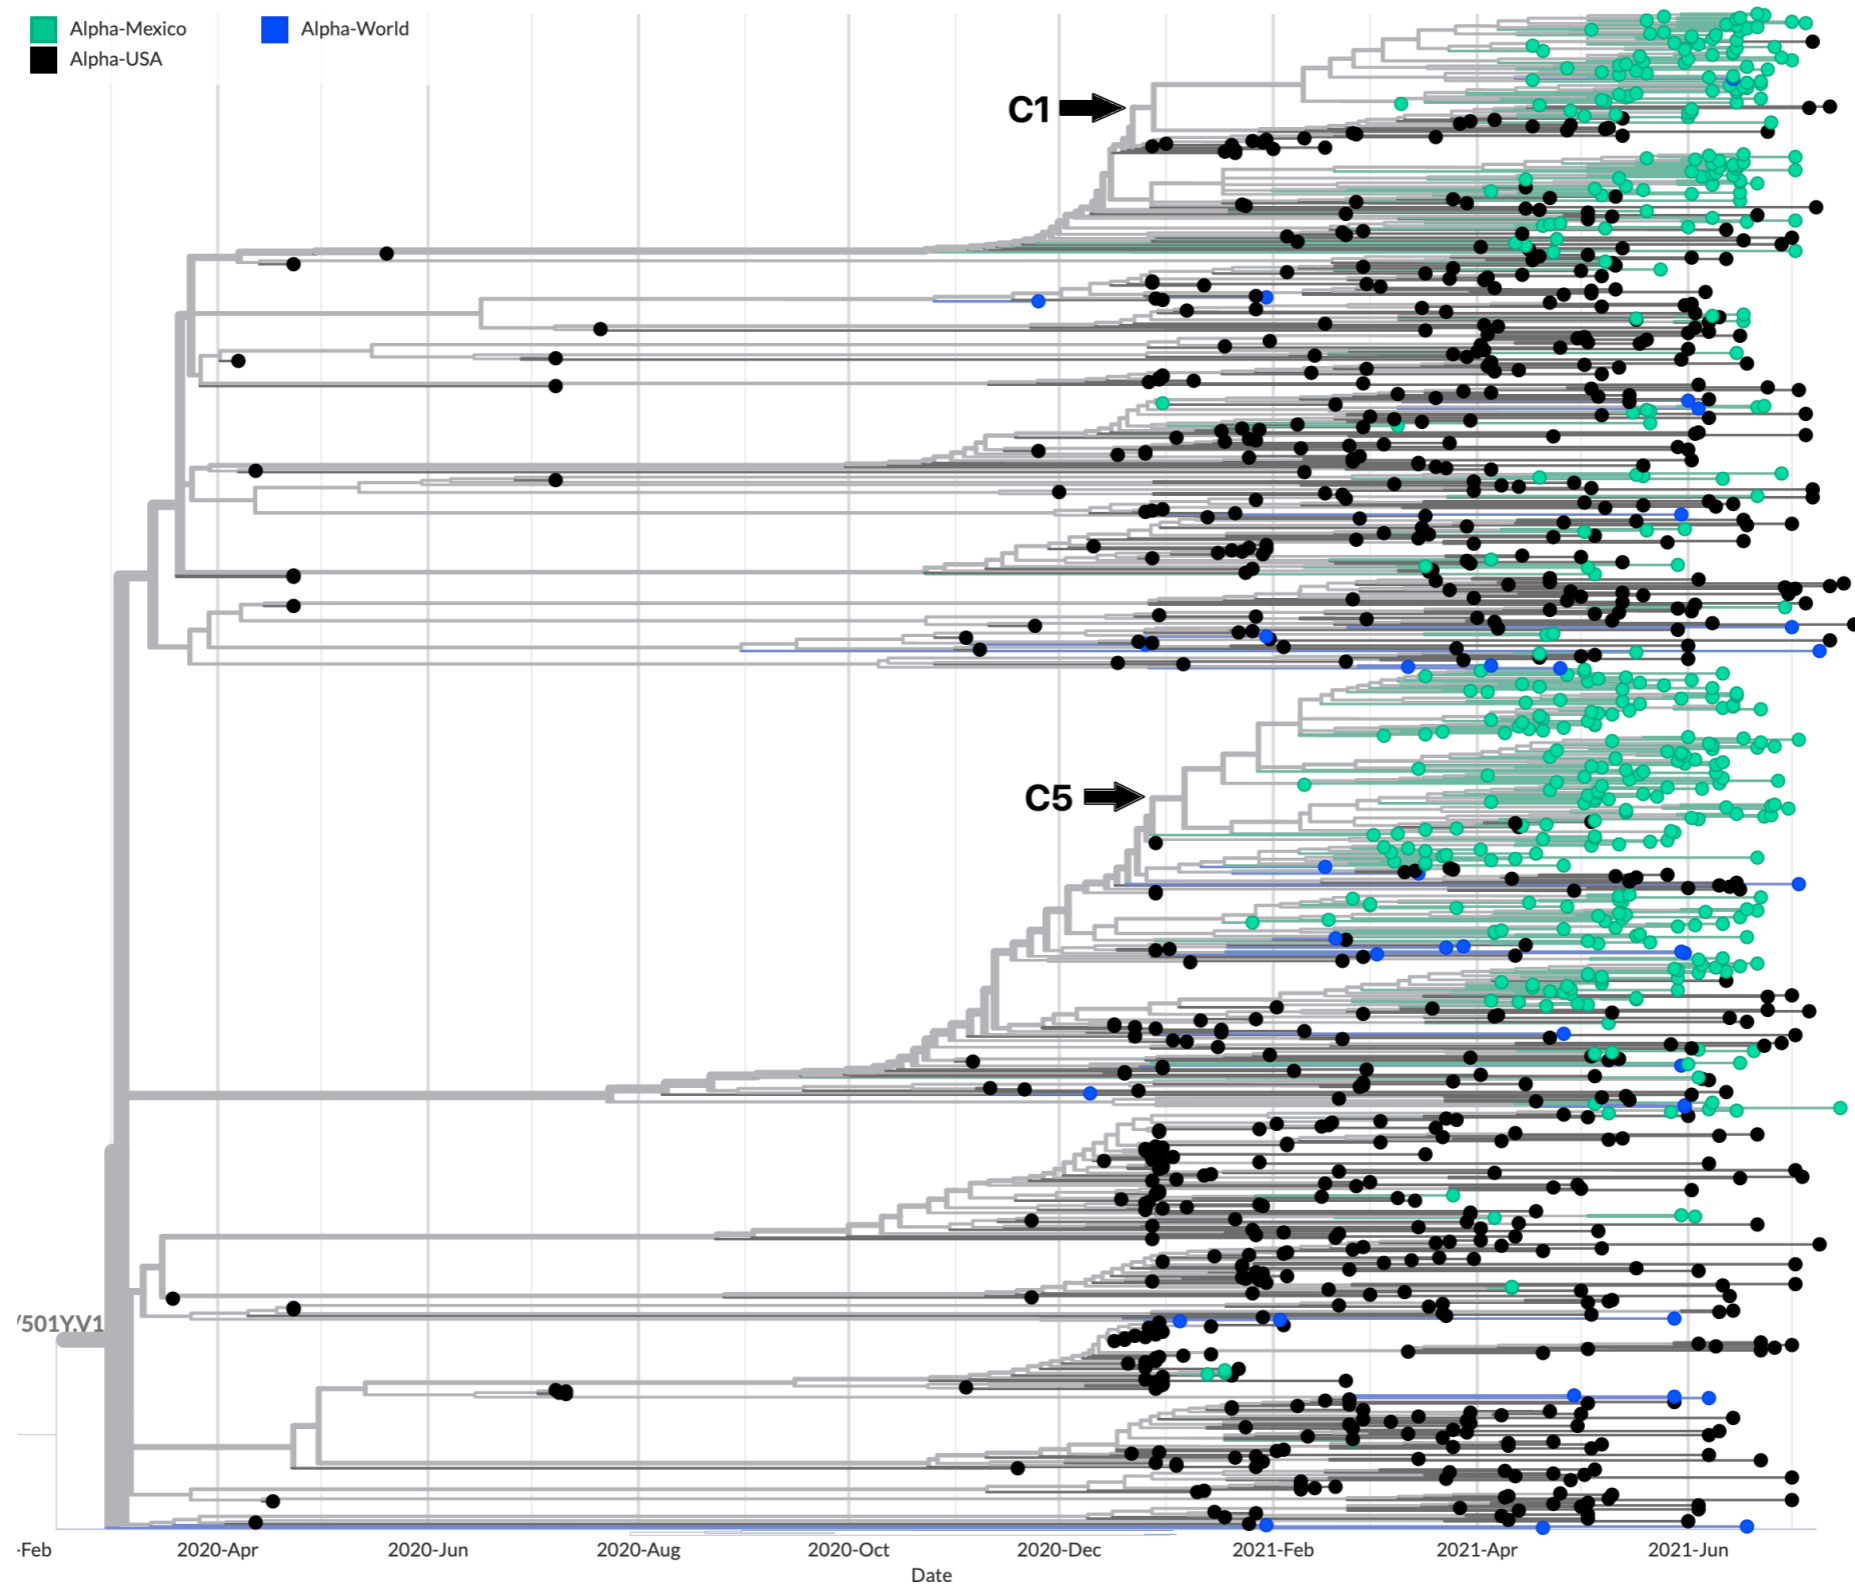

Figure S4. Zoom of a Nextstrain phylogeny depicting the relation between B.1.1.7 sequences sampled in the northern states of Mexico, the USA, and global sequences. The tips are colored by sampling location. The location of clusters C1 and C5 is shown.

**Table S1.** Description of full-length B.1.1.7 SARS-CoV-2 Mexican genomes generated and used in this study. The 473 genome sequences generated by us are shown in blue.

| Virus name                                     | Accession ID    | Genbank Id | Nextstrain Clade | Pango lineage (v2.1, 21-02-06) | # of nt | Changes compared to the reference genome of Wuhan                                                                                                                                                                                                                             |         |                                                                                                                                       | # aa | aa Deletions | aa Deletion | Missing bases |
|------------------------------------------------|-----------------|------------|------------------|--------------------------------|---------|-------------------------------------------------------------------------------------------------------------------------------------------------------------------------------------------------------------------------------------------------------------------------------|---------|---------------------------------------------------------------------------------------------------------------------------------------|------|--------------|-------------|---------------|
|                                                |                 |            |                  |                                |         | nt substitutions                                                                                                                                                                                                                                                              | # of aa | aa changes                                                                                                                            |      |              |             |               |
| hCoV-19/Mexico/BCN-IBT_IMSS_2004/2021          | EPI_ISL_2801856 | OL461235   | B.1.1.7          | GRY                            | 31      | C241T,C913T,C3037T,C3267T,C5388A,C5986T,T6954C,C14408T,C14676T,C15279T,T16176C,A23063T,C23271A,A23403G,C23604A,C23709T,T24506G,G24914C,G26730C,C27972T,G28048T,A28111G,G28280C,A28281T,T28282A,G28881A,G28882A,G28883C,C28977T                                                | 20      | N:D3L:N:R203K,N:G204R,N:S235F,ORF1a:T1001,ORF1a:A1708D,ORF1a:I2230,T,ORF1b:P314L,ORF3a:G100C,ORF8:Q27*,ORF8:R52I,ORF8:F73C,ORF9b:G38V | 6    | ORF1a:S367I  | 3           |               |
| hCoV-19/Mexico/BCN-IBT_IMSS_2033/2021          | EPI_ISL_2801878 | OL461236   | B.1.1.7          | GRY                            | 39      | 281T,T28282A,A28877T,G28878C,G28881A,G28882A,G28883C,C28977T                                                                                                                                                                                                                  | 23      | S982A,S:D1118H                                                                                                                        | 6    | ORF1a:S367I  | 15          |               |
| hCoV-19/Mexico/BCN-LANGEBIO_IMSS_1438/2021     | EPI_ISL_2942560 | OL461237   | Q.3              | GRY                            | 36      | A,G28881A,G28882A,G28883C,C28977T,G29440T                                                                                                                                                                                                                                     | 24      | 681H,S:T716I,S982A,S:D1118H                                                                                                           | 6    | ORF1a:S367I  | 110         |               |
| hCoV-19/Mexico/BCN-LANGEBIO_IMSS_1439/2021     | EPI_ISL_2942561 | OL461238   | B.1.1.7          | GRY                            | 36      | C241T,C913T,C3037T,C3267T,C5388A,C5986T,T6954C,C7299T,C9391T,C11750T,C14408T,C14676T,C15279T,T16176C,A216227C,G17658T,A23063T,C23271A,A23403G,C23604A,C23709T,T24506G,G24914C,G25273T,C27972T,G28048T,A28111G,G28280C,A28281T,T28282A,A28295G,G28881A,G28882A,G28883C,C28977T | 25      | S:T716I,S982A,S:D1118H,S:M1237I                                                                                                       | 6    | ORF1a:S367I  | 0           |               |
| hCoV-19/Mexico/BCN-LANGEBIO_IMSS_1802/2021     | EPI_ISL_2942877 | OL461239   | B.1.1.7          | GRY                            | 39      | 111G,G28280C,A28281T,T28282A,G28881A,G28882A,G28883C,C28977T                                                                                                                                                                                                                  | 24      | 14G,S:P681H,S:T716I,S982A,S:D1118H                                                                                                    | 6    | ORF1a:S367I  | 1           |               |
| hCoV-19/Mexico/BCS_IBT_IMSS_1673/2021          | EPI_ISL_2681213 | OL461240   | B.1.1.7          | GRY                            | 40      | 095T,A28111G,G28280C,A28281T,T28282A,G28881A,G28882A,G28883C,C28977T                                                                                                                                                                                                          | 27      | 3C,S:N501Y,S:A570D,S:D614G,S:P681H,S:T716I,S982A,S:D1118H                                                                             | 6    | ORF1a:S367I  | 60          |               |
| hCoV-19/Mexico/BCS_INER_IMSS_00663/2021        | EPI_ISL_1585658 | OL461241   | B.1.1.7          | GRY                            | 37      | 81T,T28282A,G28881A,G28882A,G28883C,C28977T                                                                                                                                                                                                                                   | 26      | A570D,S:D614G,S:P681H,S:T716I,S982A,S:D1118H                                                                                          | 6    | ORF1a:S367I  | 0           |               |
| hCoV-19/Mexico/BCS-IBT_IMSS_1951/2021          | EPI_ISL_2801812 | OL461242   | B.1.1.7          | GRY                            | 36      | G28882A,G28883C,C28977T,G29614T                                                                                                                                                                                                                                               | 22      | 82A,S:D1118H                                                                                                                          | 6    | ORF1a:S367I  | 0           |               |
| hCoV-19/Mexico/BCS-IBT_IMSS_1970/2021          | EPI_ISL_2801828 | OL461243   | B.1.1.7          | GRY                            | 35      | A,G28883C,C28977T,C29614T                                                                                                                                                                                                                                                     | 21      | H                                                                                                                                     | 6    | ORF1a:S367I  | 637         |               |
| hCoV-19/Mexico/CAM_IBT_IMSS_10304-NC/2021      | EPI_ISL_2681370 | OL461244   | B.1.1.7          | GRY                            | 42      | 8281T,T28282A,G28881A,G28882A,G28883C,C28977T                                                                                                                                                                                                                                 | 24      | 81H,S:T716I,S982A,S:D1118H                                                                                                            | 6    | ORF1a:S367I  | 891         |               |
| hCoV-19/Mexico/CAM_IBT_IMSS_1746/2021          | EPI_ISL_2681118 | OL461245   | B.1.1.7          | GRY                            | 38      | 8281T,T28282A,A28295G,G28881A,G28882A,G28883C,C28977T                                                                                                                                                                                                                         | 23      | D138H,S:N501Y,S:A570D,S:D614G,S:P681H,S:T716I,S982A,S:D1118H                                                                          | 6    | ORF1a:S367I  | 0           |               |
| hCoV-19/Mexico/CAM_INER_IMSS_1117/2021         | EPI_ISL_2490327 | OL461246   | B.1.1.7          | GRY                            | 38      | 8281T,T28282A,A28295G,G28881A,G28882A,G28883C,C28977T                                                                                                                                                                                                                         | 28      | R8:F73C,S98F,S:D138H,S:N501Y,S:A570D,S:D614G,S:P681H,S:T716I,S982A,S:D1118H                                                           | 6    | ORF1a:S367I  | 0           |               |
| hCoV-19/Mexico/CAM_INER_IMSS_1141/2021         | EPI_ISL_2490328 | OL461247   | B.1.1.7          | GRY                            | 35      | 8882A,G28883C,C28940T,C28977T                                                                                                                                                                                                                                                 | 24      | T716I,S982A,S:D1118H                                                                                                                  | 6    | ORF1a:S367I  | 0           |               |
| hCoV-19/Mexico/CAM_INER_IMSS_1151/2021         | EPI_ISL_2490329 | OL461248   | B.1.1.7          | GRY                            | 33      | 26520T,C27972T,G28048T,A28111G,G28280C,A28281T,T28282A,G28881A,G28882A,G28883C,C28977T                                                                                                                                                                                        | 20      | 521T,S:A570D,S:D614G,S:P681H,S:T716I,S982A,S:D1118H                                                                                   | 6    | ORF1a:S367I  | 0           |               |
| hCoV-19/Mexico/CAM_LANGEBIO_IMSS_0625/2021     | EPI_ISL_2402042 | OL461249   | B.1.1.7          | GRY                            | 37      | 8281T,T28282A,G28881A,G28882A,G28883C,C28977T                                                                                                                                                                                                                                 | 24      | S982A,S:D1118H,S:G1219V                                                                                                               | 6    | ORF1a:S367I  | 0           |               |
| hCoV-19/Mexico/CAM_LANGEBIO_IMSS_08144-NC/2021 | EPI_ISL_2969870 | OL580731   | B.1.1.7          | GR                             | 33      | 82883C,C28977T                                                                                                                                                                                                                                                                | 24      | 81H,S:T716I,S982A,S:D1118H                                                                                                            | 5    | ORF1a:S367I  | 1602        |               |
| hCoV-19/Mexico/CAM-IBT_IMSS_1865/2021          | EPI_ISL_2801583 | OL461250   | B.1.1.7          | GRY                            | 32      | 72T,G28048T,A28111G,G28280C,A28281T,T28282A,A28295G,G28881A,G28882A,G28883C,C28977T                                                                                                                                                                                           | 22      | ORF8:R52I,ORF8:F73C,S:N501Y,S:A570D,S:D614G,S:P681H,S:T716I,S982A,S:D1118H                                                            | 6    | ORF1a:S367I  | 15          |               |
| hCoV-19/Mexico/CAM-IBT_IMSS_1876/2021          | EPI_ISL_2801584 | OL461251   | B.1.1.7          | GRY                            | 37      | 282A,A28295G,G28881A,G28882A,G28883C,C28977T                                                                                                                                                                                                                                  | 26      | N501Y,S:A570D,S:D614G,S:P681H,S:T716I,S982A,S:D1118H                                                                                  | 6    | ORF1a:S367I  | 1           |               |



|                                         |                 |          |         |     |    |                                                                                                                                                                                                                                                                                                                                                                                                                                                                                                                                                                                                                                                                                                                                                                                                                              |                                                                                                                                                                                                                                                         |   |             |     |
|-----------------------------------------|-----------------|----------|---------|-----|----|------------------------------------------------------------------------------------------------------------------------------------------------------------------------------------------------------------------------------------------------------------------------------------------------------------------------------------------------------------------------------------------------------------------------------------------------------------------------------------------------------------------------------------------------------------------------------------------------------------------------------------------------------------------------------------------------------------------------------------------------------------------------------------------------------------------------------|---------------------------------------------------------------------------------------------------------------------------------------------------------------------------------------------------------------------------------------------------------|---|-------------|-----|
| hCoV-19/Mexico/CHH_IBT_IMSS_1443/2021   | EPI_ISL_2681219 | OL461272 | B.1.1.7 | GRY | 38 | A156G,C241T,C913T,C3037T,C3267T,C5388A,C5986T,T6954C,G7042T,C8502T,G9929A,A10195 G,C14120T,C14408T,C14676T,C15279T,T16176C,C19011T,A23063T,C23271A,A23403G,C23604 A,A23709T,T24506G,G24914C,C27972T,G28048T,G28075T,A28095T,A28111G,G28280C,A2828 1T,T28282A,G28888C,G28881A,G28882A,G28883C,C28977T                                                                                                                                                                                                                                                                                                                                                                                                                                                                                                                         | N:D3L:N:R203K,N:G204R,N:S235F,ORF1a:T1001,ORF1a:A1708D,ORF1a:I2230 T,ORF1a:M2259I,ORF1a:T2746I,ORF1a:D3222N,ORF1b:P218L,ORF1b:P314L,O RF8:Q27*,ORF8:R52I,ORF8:C61F,ORF8:K68*,ORF8:Y73C,S:N501Y,S:A570D,S:D 614G,S:P681H,S:T716I,S:L938F,S5982A,S:D1118H | 6 | ORF1a:S367I | 211 |
| hCoV-19/Mexico/CHH_IBT_IMSS_1444/2021   | EPI_ISL_2681104 | OL461273 | B.1.1.7 | GRY | 39 | A156G,C241T,C913T,C110T,C3037T,C3267T,C5388A,C5986T,T6954C,G7042T,C8502T,G9929A, A10195G,C14120T,C14408T,C14676T,C15279T,T16176C,C19011T,A23063T,C23271A,A23403G, C23604A,C23709T,T24506G,G24914C,C27972T,G28048T,G28075T,A28095T,A28111G,G28280 C,A28281T,T28282A,G28888C,G28881A,G28882A,G28883C,C28977T                                                                                                                                                                                                                                                                                                                                                                                                                                                                                                                   | N:D3L:N:R203K,N:G204R,N:S235F,ORF1a:T1001,ORF1a:A1708D,ORF1a:I2230 T,ORF1a:M2259I,ORF1a:T2746I,ORF1a:D3222N,ORF1b:P218L,ORF1b:P314L,O RF8:Q27*,ORF8:R52I,ORF8:C61F,ORF8:K68*,ORF8:Y73C,S:N501Y,S:A570D,S:D 614G,S:P681H,S:T716I,S:L938F,S5982A,S:D1118H | 6 | ORF1a:S367I | 0   |
| hCoV-19/Mexico/CHH_INER_IMSS_00382/2021 | EPI_ISL_1585392 | OL461274 | B.1.1.7 | GRY | 30 | C241T,C913T,C3037T,C3267T,C5388A,C5986T,T6954C,C11750T,C14408T,C14676T,C15279T,T16 176C,A23063T,C23271A,A23403G,C23604A,C23709T,T24506G,G24914C,C26270T,C27972T,G2 8048T,A28111G,G28280C,A28281T,T28282A,G28881A,G28882A,G28883C,C28977T                                                                                                                                                                                                                                                                                                                                                                                                                                                                                                                                                                                     | ET9J,N:D3L:N:R203K,N:G204R,N:S235F,ORF1a:T1001,ORF1a:A1708D,ORF1a:I 2230T,ORF1a:L3829F,ORF1b:P314L,ORF8:Q27*,ORF8:R52I,ORF8:Y73C,S:N501Y,S:A 570D,S:D614G,S:P681H,S:T716I,S:L938F,S5982A,S:D1118H                                                       | 6 | ORF1a:S367I | 0   |
| hCoV-19/Mexico/CHH_INER_IMSS_00383/2021 | EPI_ISL_1585393 | OL461275 | B.1.1.7 | GRY | 32 | C241T,C913T,C3037T,C3267T,T4057C,C5388A,C5986T,T6954C,C11750T,A31416G,C14408T,C14 676T,C15279T,T16176C,A23063T,C23271A,A23403G,C23604A,C23709T,T24506G,G24914C,C2 6270T,C27972T,G28048T,A28111G,G28280C,A28281T,T28282A,G28881A,G28882A,G28883C,C2 8977T                                                                                                                                                                                                                                                                                                                                                                                                                                                                                                                                                                     | N:D3L:N:R203K,N:G204R,N:S235F,ORF1a:T1001,ORF1a:A1708D,ORF1a:I 2230T,ORF1a:L3829F,ORF1b:P314L,ORF8:Q27*,ORF8:R52I,ORF8:Y73C,S:N501Y,S:A 570D,S:D614G,S:P681H,S:T716I,S:L938F,S5982A,S:D1118H                                                            | 6 | ORF1a:S367I | 0   |
| hCoV-19/Mexico/CHH_INER_IMSS_00384/2021 | EPI_ISL_1585394 | OL461276 | B.1.1.7 | GRY | 32 | C241T,C913T,C3037T,C3267T,C5388A,C5986T,T6954C,C11750T,A31416G,C14408T,C14 676T,C15279T,T16176C,A23063T,C23271A,A23403G,C23604A,C23709T,T24506G,G24914C,C2 6270T,C27972T,G28048T,A28111G,G28280C,A28281T,T28282A,G28881A,G28882A,G28883C,C2 8977T                                                                                                                                                                                                                                                                                                                                                                                                                                                                                                                                                                            | N:D3L:N:R203K,N:G204R,N:S235F,ORF1a:T1001,ORF1a:A1708D,ORF1a:I 2230T,ORF1a:L3829F,ORF1b:P314L,ORF8:Q27*,ORF8:R52I,ORF8:Y73C,S:N501Y,S:A 570D,S:D614G,S:P681H,S:T716I,S:L938F,S5982A,S:D1118H                                                            | 6 | ORF1a:S367I | 0   |
| hCoV-19/Mexico/CHH_INER_IMSS_00390/2021 | EPI_ISL_1585400 | OL461277 | B.1.1.7 | GRY | 30 | C241T,C913T,C3037T,C3267T,C5388A,C5986T,T6954C,C11750T,A31416G,C14408T,C14 676T,C15279T,T16176C,A23063T,C23271A,A23403G,C23604A,C23709T,T24506G,G24914C,C2 6270T,C27972T,G28048T,A28111G,G28280C,A28281T,T28282A,G28881A,G28882A,G28883C,C2 8977T                                                                                                                                                                                                                                                                                                                                                                                                                                                                                                                                                                            | N:D3L:N:R203K,N:G204R,N:S235F,ORF1a:T1001,ORF1a:A1708D,ORF1a:I 2230T,ORF1a:L3829F,ORF1b:P314L,ORF8:Q27*,ORF8:R52I,ORF8:Y73C,S:N501Y,S:A 570D,S:D614G,S:P681H,S:T716I,S:L938F,S5982A,S:D1118H                                                            | 6 | ORF1a:S367I | 0   |
| hCoV-19/Mexico/CHH_INER_IMSS_00743/2021 | EPI_ISL_2091198 | OL461278 | B.1.1.7 | GRY | 29 | C241T,C913T,C3037T,C3096T,C3267T,C5388A,C5986T,T6954C,C9298T,C14408T,C14676T,C152 79T,T16176C,A23063T,C23271A,A23403G,C23604A,C23709T,T24506G,G24914C,C27 972T,G28048T,A28111G,G28280C,A28281T,T28282A,G28881A,G28882A,G28883C,C28977T                                                                                                                                                                                                                                                                                                                                                                                                                                                                                                                                                                                       | ET9J,N:D3L:N:R203K,N:G204R,N:S235F,ORF1a:T1001,ORF1a:A1708D,ORF1a:I 2230T,ORF1a:L3829F,ORF1b:P314L,ORF8:Q27*,ORF8:R52I,ORF8:Y73C,S:N501Y,S:A 570D,S:D614G,S:P681H,S:T716I,S:L938F,S5982A,S:D1118H                                                       | 6 | ORF1a:S367I | 0   |
| hCoV-19/Mexico/CHH_INER_IMSS_1042/2021  | EPI_ISL_2490312 | OL461279 | B.1.1.7 | GRY | 31 | C241T,C913T,C934T,C2110T,C3037T,C3267T,C4206T,C5388A,C5986T,T6954C,A9274G,C9598T,T 10913C,C21525T,C13426T,C14120T,C14408T,C14676T,C15279T,T16176C,C21575T,A23063T,C2 3271A,A23403G,C23604A,C23709T,T24506G,G24914C,T2384G,T27462C,C27972T,G28048T,A                                                                                                                                                                                                                                                                                                                                                                                                                                                                                                                                                                          | N:D3L:N:R203K,N:G204R,N:S235F,ORF1a:T1001,ORF1a:A1708D,ORF1a:I 2230T,ORF1a:L3829F,ORF1b:P314L,ORF8:Q27*,ORF 8:R52I,ORF8:Y73C,S:N501Y,S:A570D,S:D614G,S:P681H,S:T716I,S:L938F,S5982A,S:D1118H                                                            | 6 | ORF1a:S367I | 2   |
| hCoV-19/Mexico/CHH_INER_IMSS_1044/2021  | EPI_ISL_2490338 | OL461280 | B.1.1.7 | GRY | 41 | 28095T,A28111G,G28280C,A28281T,T28282A,G28881A,G28882A,G28883C,C28977T                                                                                                                                                                                                                                                                                                                                                                                                                                                                                                                                                                                                                                                                                                                                                       | N:D3L:N:R203K,N:G204R,N:S235F,ORF1a:T1001,ORF1a:A1708D,ORF1a:I 2230T,ORF1a:L3829F,ORF1b:P314L,ORF8:Q27*,ORF8:R52I,ORF8:Y73C,S:N501Y,S:A 570D,S:D614G,S:P681H,S:T716I,S:L938F,S5982A,S:D1118H                                                            | 6 | ORF1a:S367I | 2   |
| hCoV-19/Mexico/CHH_INER_IMSS_1055/2021  | EPI_ISL_2490313 | OL461281 | B.1.1.7 | GRY | 32 | C241T,C913T,C3037T,C3267T,C5388A,C5986T,T6954C,C7098C,C9298T,C14408T,C14676T,C152 79T,T16176C,A23063T,C23271A,A23403G,C23604A,C23709T,C24374T,T24506G,G24914C,C27 972T,G28048T,A28111G,G28280C,A28281T,T28282A,G28881A,G28882A,G28883C,C28977T                                                                                                                                                                                                                                                                                                                                                                                                                                                                                                                                                                               | N:D3L:N:R203K,N:G204R,N:S235F,ORF1a:T1001,ORF1a:A1708D,ORF1a:I 2230T,ORF1a:L3829F,ORF1b:P314L,ORF8:Q27*,ORF8:R52I,ORF8:Y73C,S:N501Y,S:A 570D,S:D614G,S:P681H,S:T716I,S:L938F,S5982A,S:D1118H                                                            | 6 | ORF1a:S367I | 0   |
| hCoV-19/Mexico/CHH_INER_IMSS_1060/2021  | EPI_ISL_2490317 | OL461282 | B.1.1.7 | GRY | 34 | 06G,G24914C,C27294T,C27972T,G28048T,A28111G,G28280C,A28281T,T28282A,G28881A,G28882A,G28883C,C 241T,C913T,C2695T,C3037T,C3267T,C5388A,C5986T,T6954C,C14408T,C14649T,C14676T,C15 279T,T16176C,C18348T,C2687T,A23063T,C23271A,A23403G,C23604A,C23709T,T24506G,G24 914C,C27972T,G28048T,A28111G,G28280C,A28281T,T28282A,G28881A,G28882A,G28883C,C24 1T,G271T,C913T,C3037T,C3267T,C5388A,C5986T,T6954C,C12854T,C14408T,C14676T,C152 79T,T16176C,C21639A,A23063T,C23271A,A23403G,C23604A,C23709T,C24374T,T24506G,G24                                                                                                                                                                                                                                                                                                               | N:D3L:N:R203K,N:G204R,N:S235F,ORF1a:T1001,ORF1a:A1708D,ORF1a:I 2230T,ORF1a:L3829F,ORF1b:P314L,ORF8:Q27*,ORF 8:R52I,ORF8:Y73C,S:N501Y,S:A570D,S:D614G,S:P681H,S:T716I,S:L938F,S5982A,S:D11 18H                                                           | 6 | ORF1a:S367I | 0   |
| hCoV-19/Mexico/CHH_INER_IMSS_1061/2021  | EPI_ISL_2490318 | OL461283 | B.1.1.7 | GRY | 32 | 914C,C27972T,G28048T,A28111G,G28280C,A28281T,T28282A,G28881A,G28882A,G28883C,C2 41T,G271T,C913T,C3037T,C3267T,C5388A,C5986T,T6954C,C9298T,C14408T,C14676T,C15279T,T16 176C,A23063T,C23271A,A23403G,C23604A,C23709T,C24374T,T24506G,G24914C,G25217T,G22 516T,C27972T,G28048T,A28111G,G28280C,A28281T,T28282A,G28881A,G28882A,G28883C,C2 41T,C913T,C3037T,C3267T,C5388A,C5986T,T6954C,C14408T,C14649T,C14676T,C15279T,T16 176C,C18348T,A23063T,C23271A,A23403G,C23604A,C23709T,T24506G,G24914C,C27972T,G2                                                                                                                                                                                                                                                                                                                      | N:D3L:N:R203K,N:G204R,N:S235F,ORF1a:T1001,ORF1a:A1708D,ORF1a:I 2230T,ORF1a:L3829F,ORF1b:P314L,ORF8:Q27*,ORF8:R52I,ORF8:Y73C,S:N501Y,S:A 570D,S:D614G,S:P681H,S:T716I,S:L938F,S5982A,S:D1118H                                                            | 6 | ORF1a:S367I | 0   |
| hCoV-19/Mexico/CHH_INER_IMSS_1062/2021  | EPI_ISL_2490319 | OL461284 | B.1.1.7 | GRY | 32 | 914C,C27972T,G28048T,A28111G,G28280C,A28281T,T28282A,G28881A,G28882A,G28883C,C2 41T,C913T,C3037T,C3267T,C5388A,C5986T,T6954C,C9298T,C14408T,C14676T,C15279T,T161 76C,A23063T,C23271A,A23403G,C23604A,C23709T,C24374T,T24506G,G24914C,G25217T,G22 516T,C27972T,G28048T,A28111G,G28280C,A28281T,T28282A,G28881A,G28882A,G28883C,C2 41T,C913T,C3037T,C3267T,C5388A,C5986T,T6954C,C14408T,C14649T,C14676T,C15279T,T16 176C,C18348T,A23063T,C23271A,A23403G,C23604A,C23709T,T24506G,G24914C,C27972T,G2                                                                                                                                                                                                                                                                                                                            | N:D3L:N:R203K,N:G204R,N:S235F,ORF1a:T1001,ORF1a:A1708D,ORF1a:I 2230T,ORF1a:L3829F,ORF1b:P314L,ORF8:Q27*,ORF8:R52I,ORF8:Y73C,S:N501Y,S:A 570D,S:D614G,S:P681H,S:T716I,S:L938F,S5982A,S:D1118H                                                            | 6 | ORF1a:S367I | 0   |
| hCoV-19/Mexico/CHH_INER_IMSS_1082/2021  | EPI_ISL_2490322 | OL461286 | B.1.1.7 | GRY | 30 | 8048T,A28111G,G28280C,A28281T,T28282A,G28881A,G28882A,G28883C,C28977T                                                                                                                                                                                                                                                                                                                                                                                                                                                                                                                                                                                                                                                                                                                                                        | N:D3L:N:R203K,N:G204R,N:S235F,ORF1a:T1001,ORF1a:A1708D,ORF1a:I 2230T,ORF1a:L3829F,ORF1b:P314L,ORF8:Q27*,ORF8:R52I,ORF8:Y73C,S:N501Y,S:A 570D,S:D614G,S:P681H,S:T716I,S:L938F,S5982A,S:D1118H                                                            | 6 | ORF1a:S367I | 2   |
| hCoV-19/Mexico/CHH_INER_IMSS_1093/2021  | EPI_ISL_2490323 | OL461287 | B.1.1.7 | GRY | 31 | C241T,C913T,C3037T,C3267T,C5051T,G5164T,C5388A,C5986T,T6954C,C14408T,C14676T,C152 79T,T16176C,G19525T,A23063T,C23271A,A23403G,C23604A,C23709T,T24506G,G24914C,C27 972T,G28048T,A28111G,G28280C,A28281T,T28282A,G28881A,G28882A,G28883C,C28977T                                                                                                                                                                                                                                                                                                                                                                                                                                                                                                                                                                               | N:D3L:N:R203K,N:G204R,N:S235F,ORF1a:T1001,ORF1a:A1708D,ORF1a:I 2230T,ORF1a:L3829F,ORF1b:P314L,ORF8:Q27*,ORF8:R52I,ORF8:Y73C,S:N501Y,S:A 570D,S:D614G,S:P681H,S:T716I,S:L938F,S5982A,S:D1 18H                                                            | 6 | ORF1a:S367I | 0   |
| hCoV-19/Mexico/CHH_INER_IMSS_1094/2021  | EPI_ISL_2490324 | OL461288 | B.1.1.7 | GRY | 31 | 7972T,G28048T,A28111G,G28280C,A28281T,T28282A,G28881A,G28882A,G28883C,C28977T G174T,G210T,C241T,C913T,C2453T,C3037T,C3267T,C5388A,C5986T,T6954C,T9016C,C10252T,C 14408T,C14676T,C15279T,T16176C,A23063T,C23271A,A23403G,C23604A,C23709T,T24506G,G 24914C,G25126T,G27806T,C27883T,C27972T,G28048T,A28111G,G28280C,A28281T,T28282A, G28881A,G28882A,G28883C,C28977T                                                                                                                                                                                                                                                                                                                                                                                                                                                            | N:D3L:N:R203K,N:G204R,N:S235F,ORF1a:T1001,ORF1a:A1708D,ORF1a:I 2230T,ORF1a:L3829F,ORF1b:P314L,ORF8:Q27*,ORF8:R52I,ORF8:Y73C,S:N501Y,S:A 570D,S:D614G,S:P681H,S:T716I,S:L938F,S5982A,S:D1118H                                                            | 6 | ORF1a:S367I | 0   |
| hCoV-19/Mexico/CHH_INER_IMSS_1095/2021  | EPI_ISL_2490325 | OL461289 | B.1.1.7 | GRY | 37 | C241T,C913T,C3037T,C3267T,A3492G,C5388A,C5986T,T6954C,C14408T,C14676T,C15279T,T16 176C,C21639A,A23063T,C23271A,A23403G,C23604A,C23709T,C24374T,T24506G,G24914C,C2 7972T,G28048T,A28111G,G28280C,A28281T,T28282A,C28728T,G28881A,G28882A,G28883C,C 241T,C913T,C3037T,C3267T,C4345T,C5388A,C5986T,C6145T,G6896T,C6936T,T6954C,C10456T A12162G,C14408T,C14676T,C15279T,C15720T,A16105G,T16176C,A17615G,A21137G,A23063 T,C23271A,A23403G,C23604A,C23709T,C23718T,T24506G,G24914C,G25135T,C25169T,C2797 972T,G28048T,A28111G,G28280C,A28281T,T28282A,G28881A,G28882A,G28883C,C28977T,G29 913T,C3037T,C3267T,C5388A,C5986T,T6954C,C9298T,C14408T,C14676T,C15279T,T16176C,A 23063T,C23271A,A23403G,C23604A,C23709T,C24374T,T24506G,C24912T,G24914C,C27972T, G28048T,A28111G,G28280C,A28281T,T28282A,G28881A,G28882A,G28883C,C28977T | N:D3L:N:R203K,N:G204R,N:S235F,ORF1a:T1001,ORF1a:A1708D,ORF1a:I 2230T,ORF1a:L3829F,ORF1b:P314L,ORF8:Q27*,ORF8:R52I,ORF8:Y73C,S:N501Y,S:A 570D,S:D614G,S:P681H,S:T716I,S:L938F,S5982A,S:T1117I,S:D1118H                                                   | 6 | ORF1a:S367I | 27  |
| hCoV-19/Mexico/CHH_INER_IMSS_0278/2021  | EPI_ISL_1661987 | OL461292 | B.1.1.7 | GRY | 30 | C241T,C913T,C3037T,C3267T,C5388A,C5986T,T6954C,C14408T,C14676T,C15279T,T16176C,A2 3063T,C23271A,A23403G,C23604A,C23709T,T24506G,G24914C,C27972T,G28048T,A28111G,G 28280C,A28281T,T28282A,G28881A,G28882A,G28883C,C28977T                                                                                                                                                                                                                                                                                                                                                                                                                                                                                                                                                                                                     | N:D3L:N:R203K,N:G204R,N:S235F,ORF1a:T1001,ORF1a:A1708D,ORF1a:I 2230T,ORF1a:L3829F,ORF1b:P314L,ORF8:Q27*,ORF8:R52I,ORF8:Y73C,S:N501Y,S:A 570D,S:D614G,S:P681H,S:T716I,S:L938F,S5982A,S:D1118H                                                            | 6 | ORF1a:S367I | 366 |
| hCoV-19/Mexico/CHH_INER_IMSS_0279/2021  | EPI_ISL_1661988 | OL461293 | B.1.1.7 | GRY | 28 | 28280C,A28281T,T28282A,G28881A,G28882A,G28883C,C28977T                                                                                                                                                                                                                                                                                                                                                                                                                                                                                                                                                                                                                                                                                                                                                                       | N:D3L:N:R203K,N:G204R,N:S235F,ORF1a:T1001,ORF1a:A1708D,ORF1a:I 2230T,ORF1a:L3829F,ORF1b:P314L,ORF8:Q27*,ORF8:R52I,ORF8:Y73C,S:N501Y,S:A 570D,S:D614G,S:P681H,S:T716I,S:L938F,S5982A,S:D1118H                                                            | 6 | ORF1a:S367I | 1   |
| hCoV-19/Mexico/CHH_INER_IMSS_0516/2021  | EPI_ISL_2401942 | OL461294 | B.1.1.7 | GRY | 42 | 9414C,C27972T,G28048T,A28111G,G28280C,A28281T,T28282A,G28881A,G28882A,G28883C, C241T,C913T,C3037T,C3267T,C5388A,C5986T,T6954C,C14408T,C14649T,C14676T,C15279T,T16 176C,C18348T,A23063T,C23271A,A23403G,C23604A,C23709T,T24506G,G24914C,C27972T,G2 8048T,A28111G,G28280C,A28281T,T28282A,G28881A,G28882A,G28883C,C28977T                                                                                                                                                                                                                                                                                                                                                                                                                                                                                                      | N:D3L:N:R203K,N:G204R,N:S235F,ORF1a:T1001,ORF1a:A1708D,ORF1a:I 2230T,ORF1a:L3829F,ORF1b:P314L,ORF8:Q27*,ORF8:R52I,ORF8:Y73C,S:N501Y,S:A 570D,S:D614G,S:P681H,S:T716I,S:L938F,S5982A,S:D1118H                                                            | 6 | ORF1a:S367I | 439 |



|                                                |                 |          |         |     |                                                                                                                                                                                                                                                                                                                                                                                                                |                                                                                                                                                                                                 |                                                                                                                                                                                            |             |             |      |
|------------------------------------------------|-----------------|----------|---------|-----|----------------------------------------------------------------------------------------------------------------------------------------------------------------------------------------------------------------------------------------------------------------------------------------------------------------------------------------------------------------------------------------------------------------|-------------------------------------------------------------------------------------------------------------------------------------------------------------------------------------------------|--------------------------------------------------------------------------------------------------------------------------------------------------------------------------------------------|-------------|-------------|------|
| hCoV-19/Mexico/CHH_LANGEBIO_IMSS_0559/2021     | EPI_ISL_2401981 | OL461296 | B.1.1.7 | GRY | C241T,C913T,C3037T,C3267T,G5164T,C5388A,C5986T,T6954C,T9346C,C14408T,C14676T,C15279T,T16176C,A23063T,C23271A,A23403G,C23604A,C23709T,T24506G,G24914C,C25416T,C27635T,C27972T,G28048T,A28111G,G28280C,A28281T,T28282A,G28881A,G28882A,G28883C,C2421T,C913T,T2339A,C3037T,C3267T,C5388A,C5986T,T6954C,C11750T,C14408T,C14676T,C15279T,T16176C,C18647T,A23063T,C23271A,A23403G,C23604A,C23709T,T24506G,G24914C,C2 | N:D3L:N:R203K,N:G204R,N:S235F,ORF1a:T1001,ORF1a:E1633D,ORF1a:A1708D,ORF1a:I2230T,ORF1b:P314L,ORF7b:S581L,ORF8:Q27*,ORF8:R52I,ORF8:Y73C,S:N501Y,S:A570D,S:D614G,S:P681H,S:T716I,S:S982A,S:D1118H | 6                                                                                                                                                                                          | ORF1a:S367I | 131         |      |
| hCoV-19/Mexico/CHH_LANGEBIO_IMSS_0561/2021     | EPI_ISL_2401983 | OL461297 | B.1.1.7 | GRY | 291T,T16176C,C18647T,A23063T,C23271A,A23403G,C23604A,C23709T,T24506G,G24914C,C2                                                                                                                                                                                                                                                                                                                                | N:D3L:N:R203K,N:G204R,N:S235F,ORF1a:T1001,ORF1a:I2230T,ORF1b:P314L,ORF7b:S581L,ORF8:Q27*,ORF8:R52I,ORF8:Y73C,S:N501Y,S:A570D,S:D614G,S:P681H,S:T716I,S:S982A,S:D1118H                           | 6                                                                                                                                                                                          | ORF1a:S367I | 446         |      |
| hCoV-19/Mexico/CHH_LANGEBIO_IMSS_0572/2021     | EPI_ISL_2401992 | OL461298 | B.1.1.7 | GRY | 75137T,C27972T,G28048T,A28111G,G28280C,A28281T,T28282A,G28881A,G28882A,G28883C,C2421T,C913T,C2110T,C2455T,C3037T,C3267T,C4551T,C5388A,C5986T,T6954C,G7042T,A10195G,C10582T,C10834T,C14120T,C14408T,C14676T,C15279T,T16176C,C17804T,A17805T,A23063T,C23271A,A23403G,C23604A,C23709T,T24506G,G24914C,T26171A,C27972T,G28048T,G28075                                                                              | 20                                                                                                                                                                                              | Y:S:A570D,S:D614G,S:P681H,S:T716I,S:S982A,S:D1118H                                                                                                                                         | 6           | ORF1a:S367I | 9    |
| hCoV-19/Mexico/CHH_LANGEBIO_IMSS_0580/2021     | EPI_ISL_2402000 | OL461299 | B.1.1.7 | GRY | T,A28095T,A28111G,G28280C,A28281T,T28282A,G28881A,G28882A,G28883C,C28977T                                                                                                                                                                                                                                                                                                                                      | N:D3L:N:R203K,N:G204R,N:S235F,ORF1a:T1001,ORF1a:E1633D,ORF1a:A1708D,ORF1a:I2230T,ORF1b:P314L,ORF7b:S581L,ORF8:Q27*,ORF8:R52I,ORF8:Y73C,S:N501Y,S:A570D,S:D614G,S:P681H,S:T716I,S:S982A,S:D1118H | 6                                                                                                                                                                                          | ORF1a:S367I | 501         |      |
| hCoV-19/Mexico/CHH_LANGEBIO_IMSS_0582/2021     | EPI_ISL_2402002 | OL461300 | B.1.1.7 | GRY | C241T,C913T,C3037T,C3267T,G5164T,C5388A,C5986T,T6954C,C14408T,C14676T,C15279T,T16176C,C2987T,A23063T,C23271A,A23403G,C23604A,C23709T,T24506G,G24914C,C27972T,G28048T,A28111G,G28280C,A28281T,T28282A,G28881A,G28882A,G28883C,C28977T                                                                                                                                                                           | 21                                                                                                                                                                                              | 8:R52I,ORF8:Y73C,S:N501Y,S:A570D,S:D614G,S:P681H,S:T716I,S:S982A,S:D1118H                                                                                                                  | 6           | ORF1a:S367I | 446  |
| hCoV-19/Mexico/CHH_LANGEBIO_IMSS_45998-NC/2021 | EPI_ISL_2969876 | OL461301 | B.1.1.7 | GRY | C241T,C913T,C3037T,C3267T,G5164T,C5388A,C5986T,T6954C,C11750T,C14408T,C14676T,C15279T,T16176C,C18647T,A23063T,C23271A,A23403G,C23604A,C23709T,T24506G,G24914C,C27972T,G28048T,A28111G,G28280C,A28281T,T28282A,G28881A,G28882A,G28883C,C28977T                                                                                                                                                                  | 22                                                                                                                                                                                              | 1Y:S:A570D,S:D614G,S:P681H,S:T716I,S:S982A,S:D1118H                                                                                                                                        | 6           | ORF1a:S367I | 9    |
| hCoV-19/Mexico/CHH_LANGEBIO_IMSS_46001-NC/2021 | EPI_ISL_2969877 | OL461302 | B.1.1.7 | GRY | C913T,C3037T,C3267T,C5388A,C5986T,T6954C,C14408T,C14676T,C15279T,T16176C,A23063T,C23271A,A23403G,C23604A,C23709T,T24506G,G24914C,C27972T,G28048T,A28111G,G28280C,A28281T,T28282A,G28881A,G28882A,G28883C,C28977T                                                                                                                                                                                               | 23                                                                                                                                                                                              | 8:W45L,ORF8:R52I,ORF8:Y73C,S:N501Y,S:A570D,S:D614G,S:P681H,S:T716I,S:S982A,S:D1118H                                                                                                        | 6           | ORF1a:S367I | 0    |
| hCoV-19/Mexico/CHH-IBT_IMSS_1799/2021          | EPI_ISL_2801678 | OL461303 | B.1.1.7 | GRY | C913T,C3037T,C3267T,C5388A,C5986T,T6954C,C14408T,C14676T,C15279T,C15656T,T16176C,A23063T,C23271A,A23403G,C23604A,C23709T,T24506G,G24914C,C26833T,C27972T,G28048T                                                                                                                                                                                                                                               | 24                                                                                                                                                                                              | M:A104V,N:D3L:N:R203K,N:G204R,N:S235F,ORF1a:T1001,ORF1a:A1708D,ORF1a:I2230T,ORF1b:P314L,ORF7b:S581L,ORF8:Q27*,ORF8:R52I,ORF8:Y73C,S:N501Y,S:A570D,S:D614G,S:P681H,S:T716I,S:S982A,S:D1118H | 6           | ORF1a:S367I | 1294 |
| hCoV-19/Mexico/CHH-IBT_IMSS_1813/2021          | EPI_ISL_2801692 | OL461304 | B.1.1.7 | GRY | A28111G,G28280C,A28281T,T28282A,G28881A,G28882A,G28883C,C28977T                                                                                                                                                                                                                                                                                                                                                | 25                                                                                                                                                                                              | S01Y,S:A570D,S:D614G,S:P681H,S:T716I,S:S982A,S:D1118H                                                                                                                                      | 6           | ORF1a:S367I | 2448 |
| hCoV-19/Mexico/CHH-IBT_IMSS_1813/2021          | EPI_ISL_2801692 | OL461304 | B.1.1.7 | GRY | C913T,C3037T,C3267T,C5388A,C5986T,T6954C,C14408T,C14676T,C15279T,T16176C,A23063T,C23271A,A23403G,C23604A,C23709T,T24506G,G24914C,C27972T,G28048T,A28111G,G28280C,A28281T,T28282A,G28881A,G28882A,G28883C,C28977T                                                                                                                                                                                               | 26                                                                                                                                                                                              | N:D3L:N:R203K,N:G204R,N:S235F,ORF1a:T1001,ORF1a:A1708D,ORF1a:I2230T,ORF1b:P314L,ORF7b:S581L,ORF8:Q27*,ORF8:R52I,ORF8:Y73C,S:N501Y,S:A570D,S:D614G,S:P681H,S:T716I,S:S982A,S:D1118H         | 6           | ORF1a:S367I | 696  |
| hCoV-19/Mexico/CHH-IBT_IMSS_1813/2021          | EPI_ISL_2801692 | OL461304 | B.1.1.7 | GRY | C241T,C913T,G1874T,C3037T,C3267T,C5388A,C5986T,T6954C,C9298T,C14408T,C14676T,C15279T,T16176C,C19524T,G22344T,A23063T,C23271A,A23403G,C23604A,C23709T,T24506G,G24914C,A24999C,C27972T,G28048T,A28111G,G28280C,A28281T,T28282A,G28881A,G28882A,G28883C,C28977T                                                                                                                                                   | 27                                                                                                                                                                                              | N:D3L:N:R203K,N:G204R,N:S235F,ORF1a:T1001,ORF1a:A1708D,ORF1a:I2230T,ORF1b:P314L,ORF7b:S581L,ORF8:Q27*,ORF8:R52I,ORF8:Y73C,S:N501Y,S:A570D,S:D614G,S:P681H,S:T716I,S:S982A,S:D1118H         | 6           | ORF1a:S367I | 0    |
| hCoV-19/Mexico/CHH-IBT_IMSS_1813/2021          | EPI_ISL_2801692 | OL461304 | B.1.1.7 | GRY | C241T,C913T,C3037T,C3267T,G5164T,C5388A,C5986T,T6954C,C14408T,C14676T,C15279T,T16176C,A23063T,C23271A,A23403G,C23604A,C23709T,T24506G,G24914C,C27972T,G28048T,A28111G,G28280C,A28281T,T28282A,G28881A,G28882A,G28883C,C28977T                                                                                                                                                                                  | 28                                                                                                                                                                                              | N:D3L:N:R203K,N:G204R,N:S235F,ORF1a:T1001,ORF1a:A1708D,ORF1a:I2230T,ORF1b:P314L,ORF7b:S581L,ORF8:Q27*,ORF8:R52I,ORF8:Y73C,S:N501Y,S:A570D,S:D614G,S:P681H,S:T716I,S:S982A,S:D1118H         | 6           | ORF1a:S367I | 0    |
| hCoV-19/Mexico/CHH-IBT_IMSS_1813/2021          | EPI_ISL_2801692 | OL461304 | B.1.1.7 | GRY | C241T,C913T,C3037T,C3267T,C5388A,C5986T,T6954C,C14408T,C14676T,C15279T,T16176C,A23063T,C23271A,A23403G,C23604A,C23709T,T24506G,G24914C,C27972T,G28048T,A28111G,G28280C,A28281T,T28282A,G28881A,G28882A,G28883C,C28977T                                                                                                                                                                                         | 29                                                                                                                                                                                              | A570D,S:D614G,S:P681H,S:T716I,S:S982A,S:D1118H                                                                                                                                             | 6           | ORF1a:S367I | 0    |
| hCoV-19/Mexico/CHH-LANGEBIO_IMSS_0835/2021     | EPI_ISL_2671505 | OL461305 | B.1.1.7 | GRY | C913T,C3037T,C3267T,C5388A,C5986T,T6954C,C14408T,C14676T,C15279T,T16176C,C15275T,A23063T,C23271A,A23403G,C23604A,C23709T,T24506G,G24914C,C27972T,G28048T                                                                                                                                                                                                                                                       | 30                                                                                                                                                                                              | N:D3L:N:R203K,N:G204R,N:S235F,ORF1a:T1001,ORF1a:A1708D,ORF1a:I2230T,ORF1b:P314L,ORF7b:S581L,ORF8:Q27*,ORF8:R52I,ORF8:Y73C,S:N501Y,S:A570D,S:D614G,S:P681H,S:T716I,S:S982A,S:D1118H         | 6           | ORF1a:S367I | 221  |
| hCoV-19/Mexico/CHH-LANGEBIO_IMSS_0836/2021     | EPI_ISL_2671506 | OL461306 | B.1.1.7 | GRY | C241T,C913T,C3037T,C3267T,C5388A,C5986T,T6954C,C9298T,C14408T,C14676T,C15279T,T16176C,A23063T,C23271A,A23403G,C23604A,C23709T,T24506G,G24914C,G25212T,G2756T,C27972T,G28048T,A28111G,G28280C,A28281T,T28282A,G28881A,G28882A,G28883C,C28977T                                                                                                                                                                   | 31                                                                                                                                                                                              | N:D3L:N:R203K,N:G204R,N:S235F,ORF1a:T1001,ORF1a:A1708D,ORF1a:I2230T,ORF1b:P314L,ORF7b:S581L,ORF8:Q27*,ORF8:R52I,ORF8:Y73C,S:N501Y,S:A570D,S:D614G,S:P681H,S:T716I,S:S982A,S:D1118H         | 6           | ORF1a:S367I | 5    |
| hCoV-19/Mexico/CHH-LANGEBIO_IMSS_0840/2021     | EPI_ISL_2671508 | OL461307 | B.1.1.7 | GRY | C913T,C3037T,C3267T,C5388A,C5986T,T6954C,C14408T,C14676T,C15279T,T16176C,A23063T,C23271A,A23403G,C23604A,C23709T,T24506G,G24914C,C27972T,G28048T                                                                                                                                                                                                                                                               | 32                                                                                                                                                                                              | N:D3L:N:R203K,N:G204R,N:S235F,ORF1a:T1001,ORF1a:A1708D,ORF1a:I2230T,ORF1b:P314L,ORF7b:S581L,ORF8:Q27*,ORF8:R52I,ORF8:Y73C,S:N501Y,S:A570D,S:D614G,S:P681H,S:T716I,S:S982A,S:D1118H         | 6           | ORF1a:S367I | 740  |
| hCoV-19/Mexico/CHH-LANGEBIO_IMSS_0841/2021     | EPI_ISL_2671509 | OL461308 | B.1.1.7 | GRY | T,A28111G,G28280C,A28281T,T28282A,G28881A,G28882A,G28883C,C28977T                                                                                                                                                                                                                                                                                                                                              | 33                                                                                                                                                                                              | N:D3L:N:R203K,N:G204R,N:S235F,ORF1a:T1001,ORF1a:A1708D,ORF1a:I2230T,ORF1b:P314L,ORF7b:S581L,ORF8:Q27*,ORF8:R52I,ORF8:Y73C,S:N501Y,S:A570D,S:D614G,S:P681H,S:T716I,S:S982A,S:D1118H         | 6           | ORF1a:S367I | 0    |
| hCoV-19/Mexico/CHH-LANGEBIO_IMSS_0842/2021     | EPI_ISL_2671510 | OL461309 | B.1.1.7 | GRY | C241T,C913T,C3037T,C3267T,G5164T,C5388A,C5986T,T6954C,C14408T,C14676T,C15279T,T16176C,A23063T,C23271A,A23403G,C23604A,C23709T,T24506G,G24914C,C27972T,G28048T,A28111G,G28280C,A28281T,T28282A,G28881A,G28882A,G28883C,C28977T                                                                                                                                                                                  | 34                                                                                                                                                                                              | N:D3L:N:R203K,N:G204R,N:S235F,ORF1a:T1001,ORF1a:A1708D,ORF1a:I2230T,ORF1b:P314L,ORF7b:S581L,ORF8:Q27*,ORF8:R52I,ORF8:Y73C,S:N501Y,S:A570D,S:D614G,S:P681H,S:T716I,S:S982A,S:D1118H         | 6           | ORF1a:S367I | 2    |
| hCoV-19/Mexico/CHH-LANGEBIO_IMSS_0866/2021     | EPI_ISL_2671515 | OL461310 | B.1.1.7 | GRY | C913T,G1796A,C2455T,C3037T,C3267T,G5164T,C5388A,C5986T,T6954C,C14408T,C14676T,C15279T,T16176C,A23063T,C23271A,A23403G,C23604A,C23709T,T24506G,G24914C,G25538A,C2                                                                                                                                                                                                                                               | 35                                                                                                                                                                                              | N:D3L:N:R203K,N:G204R,N:S235F,ORF1a:T1001,ORF1a:A1708D,ORF1a:I2230T,ORF1b:P314L,ORF7b:S581L,ORF8:Q27*,ORF8:R52I,ORF8:Y73C,S:N501Y,S:A570D,S:D614G,S:P681H,S:T716I,S:S982A,S:D1118H         | 6           | ORF1a:S367I | 213  |
| hCoV-19/Mexico/CHH-LANGEBIO_IMSS_0871/2021     | EPI_ISL_2671519 | OL461312 | B.1.1.7 | GRY | 7972T,G28048T,A28111G,G28280C,A28281T,T28282A,G28881A,G28882A,G28883C,C28977T                                                                                                                                                                                                                                                                                                                                  | 36                                                                                                                                                                                              | N:D3L:N:R203K,N:G204R,N:S235F,ORF1a:T1001,ORF1a:A1708D,ORF1a:I2230T,ORF1b:P314L,ORF7b:S581L,ORF8:Q27*,ORF8:R52I,ORF8:Y73C,S:N501Y,S:A570D,S:D614G,S:P681H,S:T716I,S:S982A,S:D1118H         | 6           | ORF1a:S367I | 168  |
| hCoV-19/Mexico/CHH-LANGEBIO_IMSS_0879/2021     | EPI_ISL_2671521 | OL461313 | B.1.1.7 | GRY | C193T,C913T,C2327T,C3037T,C3267T,C5388A,C5986T,T6954C,T11672A,C12008T,C14408T,C14676T,C15279T,T16176C,C19259T,C22987T,A23063T,C23271A,A23403G,C23604A,C23709T,T24506G,G24914C,C27972T,G28048T,A28111G,G28280C,A28281T,T28282A,G28881A,G28882A,G28883C,C28977T                                                                                                                                                  | 37                                                                                                                                                                                              | N:D3L:N:R203K,N:G204R,N:S235F,ORF1a:T1001,ORF1a:A1708D,ORF1a:I2230T,ORF1b:P314L,ORF7b:S581L,ORF8:Q27*,ORF8:R52I,ORF8:Y73C,S:N501Y,S:A570D,S:D614G,S:P681H,S:T716I,S:S982A,S:D1118H         | 6           | ORF1a:S367I | 278  |
| hCoV-19/Mexico/CHH-LANGEBIO_IMSS_0887/2021     | EPI_ISL_2671523 | OL461314 | B.1.1.7 | GRY | C241T,C913T,C3037T,C3267T,C5388A,C5986T,T6954C,C14408T,C14676T,C15279T,T16176C,C1306T,C1622T,A23063T,C23271A,A23403G,C23604A,C23709T,T24506G,G24914C,C27972T,G28048T,A28111G,G28280C,A28281T,T28282A,G28881A,G28882A,G28883C,C28977T                                                                                                                                                                           | 38                                                                                                                                                                                              | N:D3L:N:R203K,N:G204R,N:S235F,ORF1a:T1001,ORF1a:A1708D,ORF1a:I2230T,ORF1b:P314L,ORF7b:S581L,ORF8:Q27*,ORF8:R52I,ORF8:Y73C,S:N501Y,S:A570D,S:D614G,S:P681H,S:T716I,S:S982A,S:D1118H         | 6           | ORF1a:S367I | 16   |
| hCoV-19/Mexico/CHH-LANGEBIO_IMSS_0889/2021     | EPI_ISL_2671525 | OL461315 | B.1.1.7 | GRY | C241T,C913T,C2110T,C3037T,C3267T,C5388A,C5986T,T6954C,G7042T,A8031G,A10195G,A12555G,C14120T,C14408T,C14676T,C15279T,T16176C,C20544A,A23063T,C23271A,A23403G,C23604A,C23709T,T24506G,G24914C,C27972T,G28048T,G28075T,A28111G,G28280C,A28281T,T28282A,G28881A,G28882A,G28883C,C28977T                                                                                                                            | 39                                                                                                                                                                                              | N:D3L:N:R203K,N:G204R,N:S235F,ORF1a:T1001,ORF1a:A1708D,ORF1a:I2230T,ORF1b:P314L,ORF7b:S581L,ORF8:Q27*,ORF8:R52I,ORF8:Y73C,S:N501Y,S:A570D,S:D614G,S:P681H,S:T716I,S:S982A,S:D1118H         | 6           | ORF1a:S367I | 0    |
| hCoV-19/Mexico/CHH-LANGEBIO_IMSS_1366/2021     | EPI_ISL_2942497 | OL461316 | B.1.1.7 | GRY | C241T,C913T,C3037T,C3267T,G5164T,C5388A,C5986T,T6954C,C14408T,C14676T,C15279T,T16176C,A23063T,C23271A,A23403G,C23604A,C23709T,T24506G,G24914C,C27972T,G28048T,G28075T,A28111G,G28280C,A28281T,T28282A,G28881A,G28882A,G28883C,C28977T,G29759C                                                                                                                                                                  | 40                                                                                                                                                                                              | N:D3L:N:R203K,N:G204R,N:S235F,ORF1a:T1001,ORF1a:A1708D,ORF1a:I2230T,ORF1b:P314L,ORF7b:S581L,ORF8:Q27*,ORF8:R52I,ORF8:Y73C,S:N501Y,S:A570D,S:D614G,S:P681H,S:T716I,S:S982A,S:D1118H         | 6           | ORF1a:S367I | 0    |



|                                            |                 |          |         |     |                                                                                                                                                                                                                                                                                                                                                                                                                                                                                                                                                                                   |                                                                                                                                                                                                                                                  |                                                                    |                                                                |             |     |
|--------------------------------------------|-----------------|----------|---------|-----|-----------------------------------------------------------------------------------------------------------------------------------------------------------------------------------------------------------------------------------------------------------------------------------------------------------------------------------------------------------------------------------------------------------------------------------------------------------------------------------------------------------------------------------------------------------------------------------|--------------------------------------------------------------------------------------------------------------------------------------------------------------------------------------------------------------------------------------------------|--------------------------------------------------------------------|----------------------------------------------------------------|-------------|-----|
| hCoV-19/Mexico/CHH-LANGEBIO_IMSS_1379/2021 | EPI_ISL_2942507 | OL461317 | B.1.1.7 | GRY | C241T,C913T,C3037T,C3267T,G5164T,C5388A,C5986T,T6954C,G7873T,C14408T,C14676T,C15279T,T16176C,A23063T,C23271A,A23403G,C23604A,C23709T,T24506G,G24914C,C25904T,C27972T,G28048T,A28111G,G28280C,A28281T,T28282A,G28881A,G28882A,G28883C,C28977T,C241T,C913T,C1419T,C3037T,C3267T,G5164T,C5388A,C5986T,T6954C,C11962T,C14408T,C14676T,C15279T,T16176C,C21575T,A23063T,C23271A,A23403G,C23604A,C23709T,C24381T,T24506G,G24914C,T25580C,C27972T,G28048T,A28111G,G28280C,A28281T,T28282A,G28881A,G28882A,G28883C,C28977T,C29640T                                                         | N:D3L:N:R203K,N:G204R,N:S235F,ORF1a:T1001,ORF1a:E1633D,ORF1a:A1708D,ORF1a:I2230T,ORF1a:A2345V,ORF1a:L3829F,ORF1b:P314L,ORF3a:A33S,ORF8:Q27*,ORF8:R52I,ORF8:K68*,ORF8:Y73C,S:N501Y,S:A570D,S:D614G,S:P681H,S:T716I,S:S982A,S:D1118H,S:G1219C      | 6                                                                  | ORF1a:53675                                                    | 320         |     |
| hCoV-19/Mexico/CHH-LANGEBIO_IMSS_1681/2021 | EPI_ISL_2942772 | OL461318 | B.1.1.7 | GRY | 882A,G28883C,C28977T,C29640T                                                                                                                                                                                                                                                                                                                                                                                                                                                                                                                                                      | 23                                                                                                                                                                                                                                               | 82A,S:D1118H                                                       | 43                                                             |             |     |
| hCoV-19/Mexico/CMX_IBT_IMSS_11022-NC/2021  | EPI_ISL_2681369 | OL461319 | B.1.1.7 | GRY | C241T,C913T,C3037T,C3267T,C5388A,C5986T,C6196T,T6954C,C14408T,C14676T,C15279T,T16176C,A23063T,C23271A,A23403G,C23604A,C23709T,T24506G,G24914C,G25217T,G2672T,C27972T,G28048T,A28111G,G28280C,A28281T,T28282A,G28881A,G28882A,G28883C,C241T,C913T,C3037T,C3267T,C5388A,C5986T,G6647A,T6954C,T9157C,C14408T,C14676T,T15096C,C15279T,T16176C,C17676T,C18183T,C19524T,A21519C,A23063T,C23271A,A23403G,C23604A,C23709T,A24070T,T24506G,G24914C,C25624T,C27972T,G28048T,A28095T,A28111G,G28280C,A28281T,T28282A,G28881A,G28882A,G28883C,G28884C,C28977T                                 | M:A695,N:D3L,N:R203K,N:G204R,N:S235F,ORF1a:T1001,ORF1a:A1708D,ORF1a:I2230T,ORF1b:P314L,ORF8:Q27*,ORF8:R52I,ORF8:Y73C,S:N501Y,S:A570D,S:D614G,S:P681H,S:T716I,S:S982A,S:D1118H,S:G1219C                                                           | 20                                                                 | 6                                                              | ORF1a:53675 | 861 |
| hCoV-19/Mexico/CMX_IBT_IMSS_1133/2021      | EPI_ISL_2391710 | OL461320 | B.1.1.7 | GRY | 280C,A28281T,T28282A,G28881A,G28882A,G28883C,G28884C,C28977T                                                                                                                                                                                                                                                                                                                                                                                                                                                                                                                      | 23                                                                                                                                                                                                                                               | 36H,S982A,S:D1118H                                                 | 571                                                            |             |     |
| hCoV-19/Mexico/CMX_IBT_IMSS_1134/2021      | EPI_ISL_2391660 | OL461321 | B.1.1.7 | GRY | 28281T,T28282A,G28881A,G28882A,G28883C,C28977T,T9156S                                                                                                                                                                                                                                                                                                                                                                                                                                                                                                                             | 26                                                                                                                                                                                                                                               | 01Y:SA570D,S:D614G,S:P681H,S:T716I,S:S982A,S:D1118H                | 317                                                            |             |     |
| hCoV-19/Mexico/CMX_IBT_IMSS_1156/2021      | EPI_ISL_2391508 | OL461322 | B.1.1.7 | GR  | 972T,G28048T,A28111G,G28280C,A28281T,T28282A,G28881A,G28882A,G28883C,G29175T                                                                                                                                                                                                                                                                                                                                                                                                                                                                                                      | 16                                                                                                                                                                                                                                               | 17I6I,S:D1118H                                                     | 1                                                              |             |     |
| hCoV-19/Mexico/CMX_IBT_IMSS_1263/2021      | EPI_ISL_2391617 | OL461323 | B.1.1.7 | GRY | 28282A,G28881A,G28882A,G28883C,C28977T                                                                                                                                                                                                                                                                                                                                                                                                                                                                                                                                            | 6                                                                                                                                                                                                                                                | 24P681H,S:T716I,S:S982A,S:D1118H,S:K1191N                          | 247                                                            |             |     |
| hCoV-19/Mexico/CMX_IBT_IMSS_1281/2021      | EPI_ISL_2391572 | OL461324 | B.1.1.7 | GRY | C241T,C913T,C3037T,C3267T,C5388A,C5986T,T6954C,G8102A,C14408T,C14676T,T15096C,C15279T,T16176C,C19164T,C20104T,G21893A,A23063T,C23271A,A23403G,C23604A,C23709T,T24506G,G24914C,G25096T,G25437C,G27375A,C27972T,G28048T,A28095T,A28111G,G28280C,A28281T,T28282A,G28881A,G28882A,G28883C,C28977T                                                                                                                                                                                                                                                                                     | N:D3L:N:R203K,N:G204R,N:S235F,ORF1a:T1001,ORF1a:A1708D,ORF1a:I2230T,ORF1a:V2750I,ORF1a:Q3966F,ORF1b:P314L,ORF1b:K1383R,ORF1b:H5169V,ORF1b:K2557R,ORF8:Q27*,ORF8:R52I,ORF8:Y73C,S:N501Y,S:A570D,S:D614G,S:P681H,S:T716I,S:S982A,S:D1118H,S:K1191N | 6                                                                  | 24                                                             | 22          |     |
| hCoV-19/Mexico/CMX_IBT_IMSS_1510/2021      | EPI_ISL_2681352 | OL461325 | B.1.1.7 | GRY | 06G,G24914C,C27972T,G28048T,A28111G,G28280C,A28281T,T28282A,G28881A,G28882A,G28883C,C241T,C823T,C913T,C2110T,G2305T,G3004T,C3037T,C3267T,C5388A,C5986T,T6954C,G7042T,C9803T,C14120T,C14408T,C14676T,C15279T,T16176C,A21519C,A23063T,C23271A,A23403G,C23604A,C23709T,T24506G,G24914C,G25135T,C26151T,C27972T,G28048T,A28111G,G28280C,A28281T,T28282A,G28881A,G28882A,G28883C,C28977T                                                                                                                                                                                               | N:D3L:N:R203K,N:G204R,N:S235F,ORF1a:T224A,ORF1a:P971L,ORF1a:T1001,ORF1a:I2230T,ORF1b:P314L,ORF1b:R2684S,ORF1b:P218L,ORF1b:P314L,ORF3a:P240S,ORF8:Q27*,ORF8:R52I,ORF8:Y73C,S:N501Y,S:A570D,S:D614G,S:P681H,S:T716I,S:938F,S982A,S:D1118H          | 6                                                                  | 20                                                             | 767         |     |
| hCoV-19/Mexico/CMX_IBT_IMSS_1532/2021      | EPI_ISL_2681058 | OL461326 | B.1.1.7 | GRY | 28280C,A28281T,T28282A,G28881A,G28882A,G28883C,C28977T                                                                                                                                                                                                                                                                                                                                                                                                                                                                                                                            | 6                                                                                                                                                                                                                                                | 24                                                                 | 517                                                            |             |     |
| hCoV-19/Mexico/CMX_IBT_IMSS_1535/2021      | EPI_ISL_2681165 | OL461327 | B.1.1.7 | GRY | C241T,C913T,C3037T,C3267T,C5388A,C5986T,G6647A,T6954C,C14408T,C14676T,T15096C,C15279T,T16176C,C17676T,C18183T,C19524T,A21519C,A23063T,C23271A,A23403G,C23604A,C23709T,A24070T,A24092G,T24506G,G24914C,C25624T,C27737T,C27972T,G28048T,A28095T,A28111G,G28280C,A28281T,T28282A,G28881A,G28882A,G28883C,G28884C,C241T,C913T,C3037T,C3267T,T5278C,C5388A,C5986T,T6954C,G7042T,C14120T,C14408T,C14676T,C15279T,T16176C,G21578T,A22525G,A23063T,C23271A,A23403G,C23604A,C23709T,G24415T,G24914C,C27972T,G28048T,A28095T,A28111G,G28280C,A28281T,T28282A,G2881A,G28882A,G28883C,C28977T | N:D3L:N:R203K,N:G204R,N:S235F,ORF1a:T1001,ORF1a:A1708D,ORF1a:I2230T,ORF1a:P3624L,ORF1b:P314L,ORF8:Q27*,ORF8:R52I,ORF8:Y73C,S:N501Y,S:A570D,S:D614G,S:P681H,S:T716I,S:S982A,S:D1118H                                                              | 6                                                                  | 20                                                             | 767         |     |
| hCoV-19/Mexico/CMX_IBT_IMSS_1554/2021      | EPI_ISL_2681167 | OL461328 | B.1.1.7 | GRY | 2T,G28048T,A28095T,A28111G,G28280C,A28281T,T28282A,G28881A,G28882A,G28883C,G28280C,A28281T,T28282A,G28881A,G28882A,G28883C,C28977T                                                                                                                                                                                                                                                                                                                                                                                                                                                | 27                                                                                                                                                                                                                                               | 1Y:S:A570D,S:D614G,S:P681H,S:T716I,S:Q836H,S:844V,S:S982A,S:D1118H | 0                                                              |             |     |
| hCoV-19/Mexico/CMX_IBT_IMSS_1556/2021      | EPI_ISL_2681313 | OL461330 | B.1.1.7 | GRY | 727T,T2785C,C27972T,G28048T,A28111G,G28280C,A28281T,T28282A,G28881A,G28882A,G28883C,C241T,C913T,C2937T,C3037T,C3267T,C5388A,C5986T,C6196T,T6954C,A8848G,A11898G,C14408T,C14676T,C15279T,T16176C,T19624C,A23063T,C23271A,A23403G,C23604A,C23709T,T24506G,G24914C,G25217T,C26270T,C27972T,G28048T,A28111G,G28280C,A28281T,T28282A,G2881A,G28882A,G28883C,C28977T                                                                                                                                                                                                                    | M:A695,N:D3L,N:R203K,N:G204R,N:S235F,ORF1a:T1001,ORF1a:A1708D,ORF1a:I2230T,ORF1b:P314L,ORF1b:V2117L,ORF8:Q27*,ORF8:R52I,ORF8:Y73C,S:N501Y,S:A570D,S:D614G,S:P681H,S:T716I,S:S982A,S:D1118H,S:G1219C                                              | 21                                                                 | 501Y:S:A570D,S:D614G,S:P681H,S:T716I,S:S982A,S:D1118H,S:G1219C | 588         |     |
| hCoV-19/Mexico/CMX_IBT_IMSS_1627/2021      | EPI_ISL_2681216 | OL461331 | B.1.1.7 | GRY | 81A,G28882A,G28883C,C28977T,G29175T                                                                                                                                                                                                                                                                                                                                                                                                                                                                                                                                               | 22                                                                                                                                                                                                                                               | 19C                                                                | 64                                                             |             |     |
| hCoV-19/Mexico/CMX_IBT_IMSS_1636/2021      | EPI_ISL_2681195 | OL461332 | B.1.1.7 | GRY | C241T,C913T,C3037T,C3267T,C5388A,C5986T,G6647A,C6936T,T6954C,C14408T,C14676T,T15096C,C15279T,T16176C,A23063T,C23271A,A23403G,C23595T,C23604A,C23709T,T24506G,G24914C,G25489T,C27972T,G28048T,A28095T,A28111G,G28280C,A28281T,T28282A,G28881A,G28882A,G28883C,G28913A,C28977T                                                                                                                                                                                                                                                                                                      | N:D3L:N:R203K,N:G204R,N:S235F,ORF1a:T1001,ORF1a:A1708D,ORF1a:I2230T,ORF1a:A2345V,ORF1a:L3829F,ORF1b:P314L,ORF3a:A33S,ORF8:Q27*,ORF8:R52I,ORF8:K68*,ORF8:Y73C,S:N501Y,S:A570D,S:D614G,S:P681H,S:T716I,S:S982A,S:D1118H                            | 6                                                                  | 4                                                              |             |     |
| hCoV-19/Mexico/CMX_IBT_IMSS_1637/2021      | EPI_ISL_2681174 | OL461333 | B.1.1.7 | GRY | 883C,G28913A,C28977T                                                                                                                                                                                                                                                                                                                                                                                                                                                                                                                                                              | 23                                                                                                                                                                                                                                               | 16I:S982A,S:D1118H                                                 | 0                                                              |             |     |
| hCoV-19/Mexico/CMX_IBT_IMSS_1638/2021      | EPI_ISL_2681249 | OL461334 | B.1.1.7 | GRY | 883C,G28913A,C28977T                                                                                                                                                                                                                                                                                                                                                                                                                                                                                                                                                              | 23                                                                                                                                                                                                                                               | 16I:S982A,S:D1118H                                                 | 161                                                            |             |     |
| hCoV-19/Mexico/CMX_IBT_IMSS_1643/2021      | EPI_ISL_2681226 | OL461335 | B.1.1.7 | GRY | C241T,C913T,C3037T,C3267T,C5388A,C5986T,T6954C,C7299T,C11750T,C14408T,C14676T,T15096C,C15279T,T16176C,A23063T,C23271A,A23403G,C23604A,C23709T,T24506G,G24914C,G25489T,C27972T,G28048T,A28095T,A28111G,G28280C,A28281T,T28282A,G28881A,G28882A,G28883C,G28913A,C28977T                                                                                                                                                                                                                                                                                                             | N:D3L:N:R203K,N:G204R,N:G2145,N:S235F,ORF1a:T1001,ORF1a:A1708D,ORF1a:I2230T,ORF1a:A2345V,ORF1a:L3829F,ORF1b:P314L,ORF3a:A33S,ORF8:Q27*,ORF8:R52I,ORF8:K68*,ORF8:Y73C,S:N501Y,S:A570D,S:D614G,S:P681H,S:T716I,S:S982A,S:D1118H                    | 23                                                                 | 16I:S982A,S:D1118H                                             | 95          |     |
| hCoV-19/Mexico/CMX_IBT_IMSS_1644/2021      | EPI_ISL_2681132 | OL461336 | B.1.1.7 | GRY | 883C,G28913A,C28977T                                                                                                                                                                                                                                                                                                                                                                                                                                                                                                                                                              | 23                                                                                                                                                                                                                                               | 16I:S982A,S:D1118H                                                 | 0                                                              |             |     |



|                                           |                 |          |         |     |    |                                                                                                                                                                                                                                                                                                                                                                                                                                                                                                                                                                                                                                                                                                                                                                              |                                                                                                                                                                                                                                                                          |   |     |
|-------------------------------------------|-----------------|----------|---------|-----|----|------------------------------------------------------------------------------------------------------------------------------------------------------------------------------------------------------------------------------------------------------------------------------------------------------------------------------------------------------------------------------------------------------------------------------------------------------------------------------------------------------------------------------------------------------------------------------------------------------------------------------------------------------------------------------------------------------------------------------------------------------------------------------|--------------------------------------------------------------------------------------------------------------------------------------------------------------------------------------------------------------------------------------------------------------------------|---|-----|
| hCoV-19/Mexico/CMX_IBT_IMSS_1679/2021     | EPI_ISL_2681062 | OL461337 | Q.3     | GRY | 39 | C241T,C913T,C3037T,C3267T,G5023A,C5031T,C5388A,C5986T,C6568T,T6954C,G8183A,A9529<br>G,G10396T,C14408T,C14676T,C15279T,T16176C,A17615G,G20962A,G22094C,A23063T,C2327<br>1A,A23403G,C23604A,C23709T,T24506G,G24914C,G25555T,G26730C,C27972T,G28048T,A281<br>11G,G28280C,A28281T,T28282A,G28881A,G28882A,G28883C,C28977T                                                                                                                                                                                                                                                                                                                                                                                                                                                        | M-V70L,N:D3L,N:R203K,N:G204R,N:S235F,ORF1a:T1001,ORF1a:M1586I,ORF<br>1a:T1589I,ORF1a:A1708D,ORF1a:I2230T,ORF1a:G2640R,ORF1b:P314L,ORF1b<br>:K183R,ORF1b:D2499N,ORF3a:V55F,ORF8:Q27*,ORF8:R52I,ORF8:K68*,ORF8:Y73C,S:D1<br>26                                             | 6 | 5   |
| hCoV-19/Mexico/CMX_IBT_IMSS_1686/2021     | EPI_ISL_2681066 | OL461338 | B.1.1.7 | GRY | 43 | C241T,C913T,C3037T,C3267T,C5388A,C5944T,C5986T,G6647A,G6936T,T6954C,C14408T,C1462<br>1T,C14676T,T15096C,C15279T,T16176C,C17676T,C18183T,C19524T,A21519C,A23063T,C2327<br>1A,A23403G,C23604A,C23709T,A24070T,A24092G,T24506G,G24914C,C25624T,C27737T,C2797<br>2T,G28048T,A28095T,A28111G,G28280C,A28281T,T28282A,G28881A,G28882A,G28883C,G28<br>T201A,C241T,C823T,C913T,C2110T,C3037T,C3267T,C5388A,C5986T,T6954C,G7042T,A10195G,C<br>13329T,C14120T,C14408T,C14676T,C15279T,T16176C,A23063T,C23271A,A23403G,C23604A,C<br>23709T,T24506G,G24914C,C27972T,G28048T,G28075T,A28095T,A28111G,G28280C,A28281T,<br>T28282A,G28881A,G28882A,G28883C,C28977T                                                                                                                          | N:D3L,N:R203K,N:G204P,N:S235F,ORF1a:T1001,ORF1a:A1708D,ORF1a:A212<br>8T,ORF1a:S2224F,ORF1a:I2230T,ORF1b:P314L,ORF1b:T385M,ORF1b:R2684S,<br>ORF3a:H78Y,ORF7a:T115I,ORF8:Q27*,ORF8:R52I,ORF8:K68*,ORF8:Y73C,S:N501Y<br>27                                                  | 6 | 1   |
| hCoV-19/Mexico/CMX_INER_IMSS_00652/2021   | EPI_ISL_1585647 | OL461339 | B.1.1.7 | GRY | 37 | C241T,C913T,C3037T,C3267T,C5388A,C5944T,C5986T,G6647A,G6936T,T6954C,C14408T,C1462<br>1T,C14676T,T15096C,C15279T,T16176C,C17676T,C18183T,C19524T,A21519C,A23063T,C2327<br>1A,A23403G,C23604A,C23709T,A24070T,A24092G,T24506G,G24914C,C25624T,C27737T,C2797<br>2T,G28048T,A28095T,A28111G,G28280C,A28281T,T28282A,G28881A,G28882A,G28883C,G28<br>T201A,C241T,C823T,C913T,C2110T,C3037T,C3267T,C5388A,C5986T,T6954C,G7042T,A10195G,C<br>13329T,C14120T,C14408T,C14676T,C15279T,T16176C,A23063T,C23271A,A23403G,C23604A,C<br>23709T,T24506G,G24914C,C27972T,G28048T,G28075T,A28095T,A28111G,G28280C,A28281T,<br>T28282A,G28881A,G28882A,G28883C,C28977T                                                                                                                          | N:D3L,N:R203K,N:G204R,N:S235F,ORF1a:T1001,ORF1a:A1708D,ORF1a:I2230<br>T,ORF1a:M2259I,ORF1a:T4355I,ORF1b:P218L,ORF1b:P314L,ORF1b:Q27*,ORF8:<br>R52I,ORF8:C61F,ORF8:K68*,ORF8:Y73C,S:N501Y,S:A570D,S:D614G,S:P681H,S:<br>23                                                | 6 | 0   |
| hCoV-19/Mexico/CMX_INER_IMSS_00878/2021   | EPI_ISL_2091329 | OL461340 | B.1.1.7 | GRY | 32 | C241T,C913T,C3037T,C3267T,C5388A,C5986T,G6525T,T6954C,C14408T,C14676T,C15279T,T161<br>76C,A17615G,A23063T,C23271A,A23403G,C23604A,C23709T,T24506G,G24914C,C27972T,G28<br>048T,A28111G,G28280C,A28281T,T28282A,C28775T,G28881A,G28882A,G28883C,C28977T,G2<br>C241T,C913T,C3037T,C3267T,C5388A,C5986T,G6196T,T6954C,A8848G,C14408T,C14676T,C152<br>79T,T16176C,A23063T,C23271A,A23403G,C23604A,C23709T,T24506G,G24914C,G2521T,G26<br>26                                                                                                                                                                                                                                                                                                                                        | N:D3L,N:P168S,N:R203K,N:G204R,N:S235F,ORF1a:T1001,ORF1a:A1708D,OR<br>F1a:T2087I,ORF1a:I2230T,ORF1b:P314L,ORF1b:K183R,ORF8:Q27*,ORF8:R52<br>21                                                                                                                            | 6 | 0   |
| hCoV-19/Mexico/CMX_INER_IMSS_00979/2021   | EPI_ISL_2091419 | OL461341 | B.1.1.7 | GRY | 33 | T27T,C27972T,G28048T,A28111G,G28280C,A28281T,T28282A,G28881A,G28882A,G28883C,C2<br>C241T,C913T,C2469T,C3037T,C3267T,C5388A,C5986T,T6954C,C7299T,C12924T,C14184T,C144<br>08T,C14676T,T15096C,C15279T,T16176C,A23063T,C23271A,A23403G,C23604A,C23638T,C237<br>09T,T24506G,G24914C,C25584T,G27754T,C27972T,G28048T,A28095T,A28111G,G28280C,A28<br>281T,T28282A,A28877T,G28878C,G28881A,G28882A,G28883C,C28977T,C29722T                                                                                                                                                                                                                                                                                                                                                          | N:D3L,N:R203K,N:G204R,N:S235F,ORF1a:A735V,ORF1a:T1001,ORF1a:A1708<br>D,ORF1a:I2230T,ORF1a:A2435V,ORF1a:P420I,ORF1b:P314L,ORF1b:AE121*,O<br>R8:Q27*,ORF8:R52I,ORF8:K68*,ORF8:Y73C,S:N501Y,S:A570D,S:D614G,S:P68<br>23                                                     | 6 | 0   |
| hCoV-19/Mexico/CMX_INER_IMSS_1254/2021    | EPI_ISL_2490349 | OL461342 | B.1.1.7 | GRY | 40 | C241T,C913T,C3037T,C3267T,C5388A,C5944T,C5986T,G6647A,T6954C,C14408T,C14621T,C146<br>76T,T15096C,C15279T,T16176C,C17676T,C18183T,C19524T,A21519C,T2385C,A23063T,C2327<br>1A,A23403G,C23604A,C23709T,A24070T,T24506G,G24914C,C25624T,C27737T,C27972T,G280<br>48T,A28095T,A28111G,G28280C,A28281T,T28282A,G28881A,G28882A,G28883C,G28884C,C2<br>C241T,C913T,C3037T,C3267T,C5388A,C5944T,C5986T,G6647A,G6936T,T6954C,C14408T,C1462<br>1T,C14676T,T15096C,C15279T,T16176C,C17676T,C18183T,C19524T,A21519C,A23063T,C23271<br>A,A23403G,C23604A,C23709T,A24070T,A24092G,T24506G,G24914C,C25624T,C27737T,C2797<br>2T,G28048T,A28095T,A28111G,G28280C,A28281T,T28282A,G28881A,G28882A,G28883C,G28                                                                                    | N:D3L,N:R203K,N:G204P,N:S235F,ORF1a:T1001,ORF1a:A1708D,ORF1a:A212<br>8T,ORF1a:I2230T,ORF1b:P314L,ORF1b:T385M,ORF1b:R2684S,ORF3a:H78Y,OR<br>R7a:T115I,ORF8:Q27*,ORF8:R52I,ORF8:K68*,ORF8:Y73C,S:F275L,S:N501Y,S:A<br>26                                                   | 6 | 848 |
| hCoV-19/Mexico/CMX_IBT_IMSS_15419-NC/2021 | EPI_ISL_2801784 | OL461343 | B.1.1.7 | GRY | 42 | C241T,C913T,C3037T,C3267T,C5388A,C5944T,C5986T,G6647A,G6936T,T6954C,C14408T,C1462<br>1T,C14676T,T15096C,C15279T,T16176C,C17676T,C18183T,C19524T,A21519C,A23063T,C2327<br>1A,A23403G,C23604A,C23709T,A24070T,A24092G,T24506G,G24914C,C25624T,C27737T,C2797<br>2T,G28048T,A28095T,A28111G,G28280C,A28281T,T28282A,G28881A,G28882A,G28883C,G28<br>84T,A28095T,A28111G,G28280C,A28281T,T28282A,G28881A,G28882A,G28883C,G28884C,C2<br>C241T,C913T,C3037T,C3267T,C5388A,C5944T,C5986T,G6647A,G6936T,T6954C,C14408T,C1462<br>1T,C14676T,T15096C,C15279T,T16176C,C17676T,C18183T,C19524T,A21519C,A23063T,C23271<br>A,A23403G,C23604A,C23709T,A24070T,A24092G,T24506G,G24914C,C25624T,C27737T,C2797<br>2T,G28048T,A28095T,A28111G,G28280C,A28281T,T28282A,G28881A,G28882A,G28883C,G28 | N:D3L,N:R203K,N:G204P,N:S235F,ORF1a:T1001,ORF1a:A1708D,ORF1a:A212<br>8T,ORF1a:I2230T,ORF1b:P314L,ORF1b:T385M,ORF1b:R2684S,ORF3a:H78Y,OR<br>R7a:T115I,ORF8:Q27*,ORF8:R52I,ORF8:K68*,ORF8:Y73C,S:N501Y,S:A570D,<br>S:D614G,S:P681H,S:T716I,S:Q836H,S:844Y,S:5982A,S:D1118H | 6 | 0   |
| hCoV-19/Mexico/CMX_IBT_IMSS_1898/2021     | EPI_ISL_2801765 | OL461344 | B.1.1.7 | GRY | 43 | C241T,C913T,C3037T,C3267T,C5388A,C5944T,C5986T,G6647A,G6936T,T6954C,C14408T,C1462<br>1T,C14676T,T15096C,C15279T,T16176C,C17676T,C18183T,C19524T,A21519C,A23063T,C2327<br>1A,A23403G,C23604A,C23709T,A24070T,A24092G,T24506G,G24914C,C25624T,C27737T,C2797<br>2T,G28048T,A28095T,A28111G,G28280C,A28281T,T28282A,G28881A,G28882A,G28883C,G28<br>C241T,C913T,C3037T,C3267T,C5388A,C5944T,C5986T,G6647A,G6936T,T6954C,C14408T,C1462<br>1T,C14676T,T15096C,C15279T,T16176C,C17676T,C18183T,C19524T,A21519C,A23063T,C23271<br>A,A23403G,C23604A,C23709T,A24070T,A24092G,T24506G,G24914C,C25624T,C27737T,C2797<br>2T,G28048T,A28095T,A28111G,G28280C,A28281T,T28282A,G28881A,G28882A,G28883C,G28                                                                                   | N:D3L,N:R203K,N:G204P,N:S235F,ORF1a:T1001,ORF1a:A1708D,ORF1a:A212<br>8T,ORF1a:I2230T,ORF1b:P314L,ORF1b:T385M,ORF1b:R2684S,ORF3a:H78Y,OR<br>R7a:T115I,ORF8:Q27*,ORF8:R52I,ORF8:K68*,ORF8:Y73C,S:N501Y,S:A570D,<br>S:D614G,S:P681H,S:T716I,S:Q836H,S:844Y,S:5982A,S:D1118H | 6 | 0   |
| hCoV-19/Mexico/CMX-IBT_IMSS_1917/2021     | EPI_ISL_2801781 | OL461345 | B.1.1.7 | GRY | 43 | C241T,C913T,C3037T,C3267T,C5388A,C5944T,C5986T,G6647A,G6936T,T6954C,C14408T,C1462<br>1T,C14676T,T15096C,C15279T,T16176C,C17676T,C18183T,C19524T,A21519C,A23063T,C2327<br>1A,A23403G,C23604A,C23709T,A24070T,A24092G,T24506G,G24914C,C25624T,C27737T,C2797<br>2T,G28048T,A28095T,A28111G,G28280C,A28281T,T28282A,G28881A,G28882A,G28883C,G28<br>C241T,C913T,C3037T,C3267T,G5023A,C5031T,C5388A,C5986T,C6568T,T6954C,G8183A,A9529<br>G,G10396T,C14408T,C14676T,C15279T,T16176C,A17615G,G20962A,G22094C,A23063T,C2327<br>1A,A23403G,C23604A,C23709T,T24506G,G24914C,G25555T,G26730C,C27972T,G280<br>48T,A28111G,G28280C,A28281T,T28282A,G28881A,G28882A,G28883C,C28977T                                                                                                         | N:D3L,N:R203K,N:G204R,N:S235F,ORF1a:T1001,ORF1a:A1708D,ORF1a:A212<br>8T,ORF1a:I2230T,ORF1b:P314L,ORF1b:T385M,ORF1b:R2684S,ORF3a:H78Y,OR<br>R7a:T115I,ORF8:Q27*,ORF8:R52I,ORF8:K68*,ORF8:Y73C,S:F275L,S:N501Y,S:A<br>27                                                   | 6 | 356 |
| hCoV-19/Mexico/CMX-IBT_IMSS_1931/2021     | EPI_ISL_2801797 | OL461346 | Q.3     | GRY | 40 | C241T,C913T,C3037T,C3267T,G5023A,C5031T,C5388A,C5986T,C6568T,T6954C,G8183A,A9529<br>G,G10396T,C14408T,C14676T,C15279T,T16176C,A17615G,G20962A,G22094C,A23063T,C2327<br>1A,A23403G,C23604A,C23709T,T24506G,G24914C,G25555T,G26730C,C27972T,G280<br>48T,A28111G,G28280C,A28281T,T28282A,G28881A,G28882A,G28883C,C28977T                                                                                                                                                                                                                                                                                                                                                                                                                                                        | M-V70L,N:D3L,N:R203K,N:G204R,N:S235F,ORF1a:T1001,ORF1a:M1586I,ORF<br>1a:T1589I,ORF1a:A1708D,ORF1a:I2230T,ORF1a:G2640R,ORF1b:P314L,ORF1b<br>:K183R,ORF1b:D2499N,ORF3a:V55F,ORF8:Q27*,ORF8:R52I,ORF8:K68*,ORF8:Y73C,S:D1<br>26                                             | 6 | 0   |
| hCoV-19/Mexico/CMX-IBT_IMSS_1931/2021     | EPI_ISL_2801797 | OL461346 | Q.3     | GRY | 40 | 48T,A28111G,G28280C,A28281T,T28282A,G28881A,G28882A,G28883C,C28977T<br>G174T,G210T,C241T,C913T,C1420T,C2453T,C3037T,C3267T,C5388A,C5986T,A6546G,T6954C,G<br>7393T,T9016C,C14408T,T14565C,C14676T,C15279T,T16176C,T17803G,A23063T,C23271A,A23<br>403G,C23604A,C23709T,T24506G,G24914C,C27883T,C27972T,G28048T,A28111G,G28280C,A2<br>8281T,T28282A,C2861T,G28881A,G28882A,G28883C,C28977T                                                                                                                                                                                                                                                                                                                                                                                      | N:D3L,N:R203K,N:G204R,N:S235F,ORF1a:T1001,ORF1a:A1708D,ORF1a:A212<br>8T,ORF1a:I2230T,ORF1b:P314L,ORF1b:T385M,ORF1b:R2684S,ORF3a:H78Y,OR<br>R7a:T115I,ORF8:Q27*,ORF8:R52I,ORF8:K68*,ORF8:Y73C,S:N501Y,S:A570D,<br>S:D614G,S:P681H,S:T716I,S:Q836H,S:844Y,S:5982A,S:D1118H | 6 | 0   |
| hCoV-19/Mexico/CMX-INER-IBT-0189/2021     | EPI_ISL_2346447 | OL461347 | B.1.1.7 | GRY | 39 | 8281T,T28282A,C2861T,G28881A,G28882A,G28883C,C28977T<br>T201A,C241T,C913T,C2110T,A2693T,C3037T,C3267T,C5388A,C5986T,T6954C,G7042T,A10195G,<br>C13329T,C14120T,C14408T,C14676T,C15279T,T16176C,A23063T,C23271A,A23403G,C23604A,<br>C23709T,T24506G,G24914C,C25046G,C25708T,C27972T,G28048T,G28075T,A28095T,A28111<br>G,G28280C,A28281T,T28282A,G28881A,G28882A,G28883C,C28977T                                                                                                                                                                                                                                                                                                                                                                                                | N:D3L,N:R203K,N:G204R,N:S235F,ORF1a:T1001,ORF1a:A1708D,ORF1a:A212<br>8T,ORF1a:I2230T,ORF1b:P314L,ORF1b:T385M,ORF1b:R2684S,ORF3a:H78Y,OR<br>R7a:T115I,ORF8:Q27*,ORF8:R52I,ORF8:K68*,ORF8:Y73C,S:N501Y,S:A570D,<br>S:D614G,S:P681H,S:T716I,S:Q836H,S:844Y,S:5982A,S:D1118H | 6 | 0   |
| hCoV-19/Mexico/CMX-INER-IBT-0191/2021     | EPI_ISL_2346449 | OL461348 | B.1.1.7 | GRY | 39 | C241T,C913T,C3037T,C3267T,C5388A,C5869T,C5986T,T6954C,C14408T,C14676T,T15096<br>C,C15279T,T16176C,A23063T,C23271A,A23403G,C23604A,C23709T,T24506G,G24914C,G2578<br>5T,C27972T,G28048T,A28095T,A28111G,G28280C,A28281T,T28282A,G28881A,G28882A,G288<br>83C,C28977T,C2927T,G29764A                                                                                                                                                                                                                                                                                                                                                                                                                                                                                             | N:D3L,N:R203K,N:G204R,N:S235F,ORF1a:T1001,ORF1a:A1708D,ORF1a:I2230<br>T,ORF1b:P314L,ORF3a:W131C,ORF8:Q27*,ORF8:R52I,ORF8:K68*,ORF8:Y73C,S<br>N501Y,S:A570D,S:D614G,S:P681H,S:T716I,S:5982A,S:D1118H                                                                      | 6 | 0   |
| hCoV-19/Mexico/CMX-INER-IBT-0192/2021     | EPI_ISL_2346500 | OL461349 | B.1.1.7 | GRY | 35 | C241T,C292T,C398T,C913T,C3037T,C3267T,C5388A,C5884T,C5986T,T6954C,T9292C,T9293A,C1<br>4408T,C14676T,C15279T,T16176C,T16563A,T17343C,A23063T,C23170T,C23271A,A23403G,C2<br>3604A,C23709T,T24506G,G24914C,C25626T,C27972T,G28048T,A28111G,G28280C,A28281T,T2<br>8282A,A28295C,G28881A,G28882A,G28883C,C28977T,C29200T,C29420T                                                                                                                                                                                                                                                                                                                                                                                                                                                  | N:D3L,N:R203K,N:G204R,N:S235F,ORF1a:T1001,ORF1a:A1708D,ORF1a:I2230<br>T,ORF1a:M2259I,ORF1b:P218L,ORF1b:P314L,ORF1b:A1432V,ORF8:Q27*,ORF<br>8:R52I,ORF8:K68*,ORF8:Y73C,S:N501Y,S:A570D,S:E583D,S:D614G,S:P681H,S:<br>23                                                   | 6 | 0   |
| hCoV-19/Mexico/CMX-INER-IBT-0226/2021     | EPI_ISL_2490585 | OL461350 | B.1.1.7 | GRY | 42 | C241T,C913T,C3037T,C3267T,C5388A,C5869T,T6954C,G7042T,C14120T,C1440<br>8T,C14676T,C15279T,T16176C,C17762T,A23063T,C23271A,G23311T,A23403G,C23604A,C2370<br>9T,T24506G,G24914C,C27972T,G28048T,A28095T,A28111G,G28280C,A28281T,T28282A,G288<br>81A,G28882A,G28883C,C28977T,C29555T                                                                                                                                                                                                                                                                                                                                                                                                                                                                                            | N:D3L,N:R203K,N:G204R,N:S235F,ORF1a:T1001,ORF1a:A1708D,ORF1a:A212<br>8T,ORF1a:I2230T,ORF1b:P314L,ORF1b:T385M,ORF1b:R2684S,ORF3a:H78Y,OR<br>R7a:T115I,ORF8:Q27*,ORF8:R52I,ORF8:K68*,ORF8:Y73C,S:N501Y,S:A570D,<br>S:D614G,S:P681H,S:T716I,S:Q836H,S:844Y,S:5982A,S:D1118H | 6 | 0   |
| hCoV-19/Mexico/CMX-INER-IBT-0249/2021     | EPI_ISL_2648118 | OL461352 | B.1.1.7 | GRY | 37 | 282A,G28881A,G28882A,G28883C,C28977T,C29327T<br>C241T,C913T,C3037T,C3267T,A3492G,C4331T,C5388A,C5986T,T6954C,C13423A,C13424A,C144<br>08T,C14676T,C15279T,T16176C,C18555T,C21639A,A23063T,C23271A,A23403G,A23523C,C236<br>04A,C23709T,C24374T,T24506G,G24914C,C27972T,G28048T,A28111G,G28280C,A28281T,T28<br>282A,G28295C,G28881A,G28882A,G28883C,C28977T,C29200T,C29420T                                                                                                                                                                                                                                                                                                                                                                                                     | N:D3L,N:R203K,N:G204R,N:S235F,ORF1a:T1001,ORF1a:A1708D,ORF1a:A212<br>8T,ORF1a:I2230T,ORF1b:P314L,ORF1b:T385M,ORF1b:R2684S,ORF3a:H78Y,OR<br>R7a:T115I,ORF8:Q27*,ORF8:R52I,ORF8:K68*,ORF8:Y73C,S:N501Y,S:A570D,<br>S:D614G,S:P681H,S:T716I,S:Q836H,S:844Y,S:5982A,S:D1118H | 6 | 0   |
| hCoV-19/Mexico/CMX-INER-IBT-0250/2021     | EPI_ISL_2648119 | OL461353 | B.1.1.7 | GRY | 37 | 1T,T28282A,G28881A,G28882A,G28883C,C28977T<br>C241T,C913T,C2110T,A2206C,C3037T,C3267T,C5388A,C5986T,T6954C,G7042T,A10195G,C1175<br>0T,C14120T,C14408T,C14676T,C15279T,T16176C,G18674A,C20081T,A23063T,C23271A,A2340<br>3G,C23604A,C23709T,T24379C,T24506G,G24914C,C27972T,G28048T,G28075T,A28095T,A281<br>11G,G28280C,A28281T,T28282A,G28881A,G28882A,G28883C,C28977T                                                                                                                                                                                                                                                                                                                                                                                                        | N:D3L,N:R203K,N:G204R,N:S235F,ORF1a:R560G,ORF1a:M584V,ORF1a:T1001<br>I,ORF1a:A1708D,ORF1a:I2230T,ORF1b:P218L,ORF1b:P314L,ORF1b:A1975S,OR<br>F8:Q27*,ORF8:R52I,ORF8:K68*,ORF8:Y73C,S:T284I,S:N501Y,S:A570D,S:D614G<br>24                                                  | 6 | 0   |
| hCoV-19/Mexico/CMX-INER-IBT-0273/2021     | EPI_ISL_2777228 | OL461354 | B.1.1.7 | GRY | 39 | C241T,C913T,C2110T,A2206C,C3037T,C3267T,C5388A,C5986T,T6954C,G7042T,A10195G,C1175<br>0T,C14120T,C14408T,C14676T,C15279T,T16176C,G18674A,C20081T,A23063T,C23271A,A2340<br>3G,C23604A,C23709T,T24379C,T24506G,G24914C,C27972T,G28048T,G28075T,A28095T,A281<br>11G,G28280C,A28281T,T28282A,G28881A,G28882A,G28883C,C28977T                                                                                                                                                                                                                                                                                                                                                                                                                                                      | N:D3L,N:R203K,N:G204R,N:S235F,ORF1a:R567D,ORF1a:T1001,ORF1a:A1708<br>D,ORF1a:I2230T,ORF1a:M2259I,ORF1a:I3829F,ORF1b:P218L,ORF1b:P314L,OR<br>F1b:R1736K,ORF1b:S2205F,ORF8:Q27*,OR                                                                                         |   |     |



|                                                |                 |          |         |     |                                                                                                                                                                                                                                                                                                                                                                                                                                                                                                                                         |                                                                                                                                                                                                                                                                              |   |     |
|------------------------------------------------|-----------------|----------|---------|-----|-----------------------------------------------------------------------------------------------------------------------------------------------------------------------------------------------------------------------------------------------------------------------------------------------------------------------------------------------------------------------------------------------------------------------------------------------------------------------------------------------------------------------------------------|------------------------------------------------------------------------------------------------------------------------------------------------------------------------------------------------------------------------------------------------------------------------------|---|-----|
| hCoV-19/Mexico/CMX-LANGEBIO_IMSS_1117/2021     | EPI_ISL_2671536 | OL461357 | B.1.1.7 | GRY | C241T,C913T,C3037T,C3267T,C5388A,C5986T,C6196T,T6954C,A8848G,C14408T,C15279T,T16176C,A23063T,C23271A,A23403G,C23604A,C23709T,C24370T,T24506G,G24914C,G25212T,G26727T,C27972T,G28048T,A28111G,G28280C,A28281T,T28282A,G28881A,G28882A,G28883C,C241T,C913T,C3037T,C3267T,C4832T,C5388A,C5986T,C6196T,T6954C,A8848G,C10078T,C12747T,C14408T,C14676T,C15279T,T16176C,A23063T,C23271A,A23403G,C23604A,C23709T,T24506G,G24914C,G25212T,G26727T,C27972T,G28048T,A28111G,G28280C,A28281T,T28282A,G2881A,G28882A,G28883C,C28977T,G29175T,C29750T | M:A695,N:D3L,N:R203K,N:G204R,N:S235F,ORF1a:T1001,ORF1a:A1708D,ORF1a:I2230T,ORF1b:P314L,ORF8:Q27*,ORF8:R52I,ORF8:F73C,S:N501Y,S:A570D,S:D614G,S:P681H,S:T716I,S:S982A,S:D1118H,S:M1237I                                                                                       | 6 | 402 |
| hCoV-19/Mexico/CMX-LANGEBIO_IMSS_1122/2021     | EPI_ISL_2671538 | OL461358 | B.1.1.7 | GRY | C913T,A2317T,C2453T,C3037T,C3267T,C5388A,C5986T,C6433T,T6954C,C9611T,C11750T,C14408T,C14676T,C15279T,T16176C,A18517C,C21008T,C21855T,G21974C,A23063T,C23271A,A23403G,C23604A,C23709T,T24506G,G24914C,C27643T,C27972T,T27977C,G28048T,A28111G,G28280C,A28281T,T28282A,G2881A,G28882A,G28883C,C28977T                                                                                                                                                                                                                                     | N:D3L,N:N8D,N:R203K,N:G204R,N:S235F,ORF1a:K684N,ORF1a:L730F,ORF1a:T1001,ORF1a:A1708D,ORF1a:I2230T,ORF1a:L3116F,ORF1a:L3829F,ORF1b:P314L,ORF1b:N1684H,ORF1b:T2514I,ORF7a:P84S,ORF8:Q27*,ORF8:R52I,ORF8:F73C,S:N501Y,S:A570D,S:D614G,S:P681H,S:T716I,S:S982A,S:D1118H,S:M1237I | 6 | 23  |
| hCoV-19/Mexico/CMX-LANGEBIO_IMSS_1461/2021     | EPI_ISL_2942580 | OL461359 | B.1.1.7 | GRY | C241T,C913T,C3037T,C3267T,C5388A,C5986T,T6954C,C7299T,C11750T,C14408T,C14676T,T15096C,C15279T,T16176C,C16222T,A23063T,C23271A,A23403G,C23604A,C23709T,T24506G,G24914C,G25489T,C27972T,G28048T,A28095T,A28111G,G28280C,A28281T,T28282A,G2881A,G28882A,G28883C,G28913A,C28977T                                                                                                                                                                                                                                                            | N:D3L,N:R203K,N:G204R,N:S235F,ORF1a:T1001,ORF1a:A1708D,ORF1a:I2230T,ORF1a:A2345V,ORF1a:L3829F,ORF1b:P314L,ORF1b:H919I,ORF8:F73C,S:N501Y,S:A570D,S:D614G,S:P681H,S:T716I,S:S982A,S:D1118H                                                                                     | 6 | 114 |
| hCoV-19/Mexico/CMX-LANGEBIO_IMSS_1463/2021     | EPI_ISL_2942582 | OL461360 | B.1.1.7 | GRY | T78G,C241T,C913T,C3037T,C3267T,C5388A,C5986T,G6647A,T6954C,A10486G,C14408T,C14676T,T15096C,C15279T,T16176C,C17676T,C18183T,C19524T,A21519C,G2217A,A23063T,C23271A,A23403G,C23604A,C23709T,A24070T,T24506G,G24914C,C25624T,G26918T,T27384C,C27406T,C27972T,G28048T,A28111G,G28280C,A28281T,T28282A,G2881A,G28882A,G28883C,G28913A,C28977T                                                                                                                                                                                                | N:D3L,N:R203K,N:G204R,N:S235F,ORF1a:T1001,ORF1a:A1708D,ORF1a:A2128T,ORF1a:I2230T,ORF1b:P314L,ORF1b:R284S,ORF8a:H78Y,ORF7a:L5F,ORF8:Q27*,ORF8:R52I,ORF8:F73C,S:G2195,S:N501Y,S:A570D,S:D614G,S:P681H,S:T716I,S:Q836H,S:S982A,S:D1118H                                         | 6 | 0   |
| hCoV-19/Mexico/CMX-LANGEBIO_IMSS_1466/2021     | EPI_ISL_2942584 | OL461361 | B.1.1.7 | GRY | C06T,C27972T,G28048T,A28111G,G28280C,A28281T,T28282A,G2881A,G28882A,G28883C,G28913A,C28977T                                                                                                                                                                                                                                                                                                                                                                                                                                             | N:D3L,N:N8D,N:R203K,N:G204R,N:S235F,ORF1a:L730F,ORF1a:T1001,ORF1a:A1708D,ORF1a:I2230T,ORF1a:L3116F,ORF1a:L3829F,ORF1b:P314L,ORF8:Q27*,ORF8:R52I,ORF8:F73C,S:N501Y,S:A570D,S:D614G,S:P681H,S:T716I,S:S982A,S:D1118H,S:M1237I                                                  | 6 | 1   |
| hCoV-19/Mexico/COA_IBT_IMSS_1400/2021          | EPI_ISL_2681095 | OL461362 | B.1.1.7 | GRY | A28295G,G28881A,G28882A,G28883C,C28977T                                                                                                                                                                                                                                                                                                                                                                                                                                                                                                 | N:D3L,N:R203K,N:G204R,N:S235F,ORF1a:T1001,ORF1a:A1708D,ORF1a:I2230T,ORF1a:M2259I,ORF1b:P218L,ORF1b:P314L,ORF8:Q27*,ORF8:R52I,ORF8:F73C,S:N501Y,S:A570D,S:D614G,S:P681H,S:T716I,S:S982A,S:D1118H,S:M1237I                                                                     | 6 | 0   |
| hCoV-19/Mexico/COA_INER_IMSS_1085/2021         | EPI_ISL_2490340 | OL461363 | B.1.1.7 | GRY | C241T,C913T,C2110T,C3037T,C3267T,C5388A,C5986T,T6954C,G7042T,A10195G,C11224T,C13923T,C14120T,C14408T,C14676T,C15279T,T16176C,C20031T,G22131A,A23063T,C23271A,A23403G,C23604A,C23709T,T24506G,G24914C,C27972T,G28048T,A28111G,G28280C,A28281T,T28282A,G2881A,G28882A,G28883C,C28977T                                                                                                                                                                                                                                                     | N:D3L,N:R203K,N:G204R,N:S235F,ORF1a:T1001,ORF1a:A1708D,ORF1a:I2230T,ORF1a:M2259I,ORF1b:P218L,ORF1b:P314L,ORF8:Q27*,ORF8:R52I,ORF8:F73C,S:N501Y,S:A570D,S:D614G,S:P681H,S:T716I,S:S982A,S:D1118H                                                                              | 6 | 0   |
| hCoV-19/Mexico/COA_LANGEBIO_IMSS_0535/2021     | EPI_ISL_2401962 | OL461364 | B.1.1.7 | GRY | C241T,C913T,C2110T,C3037T,C3267T,C5388A,C5986T,T6954C,G7042T,A10195G,C14120T,C14408T,C14676T,C15279T,C15933T,T16176C,A23063T,C23271A,A23403G,C23604A,C23709T,T24506G,G24914C,A27745G,C27972T,G28048T,G28075T,A28095T,A28111G,G28280C,A28281T,T28282A,G2881A,G28882A,G28883C,C28977T                                                                                                                                                                                                                                                     | N:D3L,N:R203K,N:G204R,N:S235F,ORF1a:T1001,ORF1a:A1708D,ORF1a:I2230T,ORF1a:M2259I,ORF1b:P218L,ORF1b:P314L,ORF8:Q27*,ORF8:R52I,ORF8:F73C,S:N501Y,S:A570D,S:D614G,S:P681H,S:T716I,S:S982A,S:D1118H                                                                              | 6 | 331 |
| hCoV-19/Mexico/COA_LANGEBIO_IMSS_0575/2021     | EPI_ISL_2401995 | OL461365 | B.1.1.7 | GRY | C241T,C913T,C2110T,C3037T,C3267T,C5388A,C5986T,T6954C,G7042T,A10195G,C14120T,C14408T,C14676T,C15279T,C15933T,T16176C,C21597T,A23063T,C23271A,A23403G,C23604A,C23709T,T24506G,G24914C,G25855T,A27745G,C27972T,G28048T,G28075T,A28095T,A28111G,G28280C,A28281T,T28282A,G2881A,G28882A,G28883C,C28977T                                                                                                                                                                                                                                     | N:D3L,N:R203K,N:G204R,N:S235F,ORF1a:T1001,ORF1a:A1708D,ORF1a:I2230T,ORF1a:M2259I,ORF1b:P218L,ORF1b:P314L,ORF8:Q27*,ORF8:R52I,ORF8:F73C,S:N501Y,S:A570D,S:D614G,S:P681H,S:T716I,S:S982A,S:D1118H                                                                              | 6 | 1   |
| hCoV-19/Mexico/COA_LANGEBIO_IMSS_0592/2021     | EPI_ISL_2402011 | OL461366 | B.1.1.7 | GRY | C241T,C913T,C3037T,C3267T,C5388A,C5986T,T6954C,C14408T,C14676T,C15279T,T16176C,A21583G,A23063T,C23271A,A23403G,C23604A,C23709T,T24506G,G24914C,C26833T,T27292C,C27972T,G28048T,C28059A,A28111G,G28280C,A28281T,T28282A,G2881A,G28882A,G28883C,C241T,C913T,C2453T,C3037T,C3267T,C5388A,C5986T,T6954C,A9424G,C9611T,C14408T,C14676T,C15279T,T16176C,C21855T,A23063T,C23271A,A23403G,C23604A,C23709T,T24506G,G24914C,G24914C,G24971A,C27972T,G28048T,A28111G,G28280C,A28281T,T28282A,G2881A,G28882A,G28883C,C28977T,C29632T                | N:D3L,N:R203K,N:G204R,N:S235F,ORF1a:T1001,ORF1a:A1708D,ORF1a:I2230T,ORF1a:M2259I,ORF1b:P218L,ORF1b:P314L,ORF8:Q27*,ORF8:R52I,ORF8:F73C,S:N501Y,S:A570D,S:D614G,S:P681H,S:T716I,S:S982A,S:D1118H                                                                              | 6 | 34  |
| hCoV-19/Mexico/COA_LANGEBIO_IMSS_0594/2021     | EPI_ISL_2402013 | OL461367 | B.1.1.7 | GRY | C241T,C913T,C3037T,C3267T,C5388A,C5986T,T6954C,C14408T,C14676T,C15279T,T16176C,A21583G,A23063T,C23271A,A23403G,C23604A,C23709T,T24506G,G24914C,C26833T,T27292C,C27972T,G28048T,C28059A,A28111G,G28280C,A28281T,T28282A,G2881A,G28882A,G28883C,C241T,C913T,C2453T,C3037T,C3267T,C5388A,C5986T,T6954C,A9424G,C9611T,C14408T,C14676T,C15279T,T16176C,C21855T,A23063T,C23271A,A23403G,C23604A,C23709T,T24506G,G24914C,G24914C,G24971A,C27972T,G28048T,A28111G,G28280C,A28281T,T28282A,G2881A,G28882A,G28883C,C28977T,C29632T                | N:D3L,N:N8D,N:R203K,N:G204R,N:S235F,ORF1a:L730F,ORF1a:T1001,ORF1a:A1708D,ORF1a:I2230T,ORF1a:L3116F,ORF1b:P314L,ORF8:Q27*,ORF8:R52I,ORF8:F73C,S:N501Y,S:A570D,S:D614G,S:P681H,S:T716I,S:S982A,S:D1118H                                                                        | 6 | 444 |
| hCoV-19/Mexico/COA_LANGEBIO_IMSS_0595/2021     | EPI_ISL_2402014 | OL461368 | B.1.1.7 | GRY | C4C,C27972T,G28048T,A28111G,G28280C,A28281T,T28282A,A28295G,G2881A,G28882A,G28883C,C28977T                                                                                                                                                                                                                                                                                                                                                                                                                                              | N:D3L,N:R203K,N:G204R,N:S235F,ORF1a:T1001,ORF1a:A1708D,ORF1a:I2230T,ORF1a:M2259I,ORF1b:P218L,ORF1b:P314L,ORF8:Q27*,ORF8:R52I,ORF8:F73C,S:N501Y,S:A570D,S:D614G,S:P681H,S:T716I,S:S982A,S:D1118H                                                                              | 6 | 218 |
| hCoV-19/Mexico/COA_LANGEBIO_IMSS_69504-NC/2021 | EPI_ISL_2969925 | OL461369 | B.1.1.7 | GRY | C241T,C683T,C913T,C3037T,A3255G,C3267T,C5388A,C5986T,T6001C,G6653T,T6954C,A12555G,C14408T,C14676T,C15279T,T16176C,C18348T,A23063T,C23271A,A23403G,C23604A,C23709T,T24506G,G24914C,G24914C,G24971A,C27972T,G28048T,A28111G,G28280C,A28281T,T28282A,G2881A,G28882A,G28883C,C28977T,C29632T                                                                                                                                                                                                                                                | N:D3L,N:R203K,N:G204R,N:S235F,ORF1a:N997S,ORF1a:T1001,ORF1a:A1708D,ORF1a:I2230T,ORF1a:M2259I,ORF1b:P218L,ORF1b:P314L,ORF8:Q27*,ORF8:R52I,ORF8:F73C,S:N501Y,S:A570D,S:D614G,S:P681H,S:T716I,S:S982A,S:D1118H                                                                  | 6 | 986 |
| hCoV-19/Mexico/COA-IBT_IMSS_1820/2021          | EPI_ISL_2801696 | OL461370 | B.1.1.7 | GRY | T78G,C913T,C3037T,C3267T,C5388A,C5986T,T6954C,G7042T,C7765T,A10195G,C12880T,C14120T,C14408T,C14676T,C15279T,C15933T,T16176C,G22104C,A23063T,C23271A,A23403G,C23604A,C23709T,T24506G,G24914C,G24971A,C27972T,G28048T,A28111G,G28280C,A28281T,T28282A,G2881A,G28882A,G28883C,C28977T,C29632T                                                                                                                                                                                                                                              | N:D3L,N:R203K,N:G204R,N:S235F,ORF1a:N997S,ORF1a:T1001,ORF1a:A1708D,ORF1a:I2230T,ORF1a:M2259I,ORF1b:P218L,ORF1b:P314L,ORF8:Q27*,ORF8:R52I,ORF8:F73C,S:N501Y,S:A570D,S:D614G,S:P681H,S:T716I,S:S982A,S:D1118H                                                                  | 6 | 743 |
| hCoV-19/Mexico/COA-LANGEBIO_IMSS_0874/2021     | EPI_ISL_2671546 | OL461371 | B.1.1.7 | GRY | C06T,C27972T,G28048T,A28111G,G28280C,A28281T,T28282A,G2881A,G28882A,G28883C,G28913A,C28977T                                                                                                                                                                                                                                                                                                                                                                                                                                             | N:D3L,N:R203K,N:G204R,N:S235F,ORF1a:N997S,ORF1a:T1001,ORF1a:A1708D,ORF1a:I2230T,ORF1a:M2259I,ORF1b:P218L,ORF1b:P314L,ORF8:Q27*,ORF8:R52I,ORF8:F73C,S:N501Y,S:A570D,S:D614G,S:P681H,S:T716I,S:S982A,S:D1118H                                                                  | 6 | 411 |
| hCoV-19/Mexico/COA-LANGEBIO_IMSS_1345/2021     | EPI_ISL_2942482 | OL461372 | B.1.1.7 | GRY | C913T,C2110T,C3037T,C3267T,C5388A,C5986T,T6954C,G7042T,C7765T,C10156T,A10195G,C11199T,C12880T,C14120T,C14408T,C14676T,C15279T,C15933T,T16176C,G22104C,A23063T,C23271A,A23403G,C23604A,C23709T,T24506G,G24914C,G24971A,C27972T,G28048T,A28111G,G28280C,A28281T,T28282A,G2881A,G28882A,G28883C,C28977T,C29632T                                                                                                                                                                                                                            | N:D3L,N:R203K,N:G204R,N:S235F,ORF1a:N997S,ORF1a:T1001,ORF1a:A1708D,ORF1a:I2230T,ORF1a:M2259I,ORF1b:P218L,ORF1b:P314L,ORF8:Q27*,ORF8:R52I,ORF8:F73C,S:N501Y,S:A570D,S:D614G,S:P681H,S:T716I,S:S982A,S:D1118H                                                                  | 6 | 1   |
| hCoV-19/Mexico/COA-LANGEBIO_IMSS_1377/2021     | EPI_ISL_2942505 | OL461373 | B.1.1.7 | GRY | G94T,C241T,C913T,C3037T,A3255G,C3267T,C5388A,C5986T,T6001C,G6653T,T6954C,A12555G,C12921T,C14408T,C14676T,C15279T,T16176C,C18348T,A23063T,C23271A,A23403G,C23604A,C23709T,T24506G,G24914C,G24971A,C27972T,G28048T,A28111G,G28280C,A28281T,T28282A,G2881A,G28882A,G28883C,C28977T,C29632T                                                                                                                                                                                                                                                 | N:D3L,N:A1525,N:R203K,N:G204R,N:S235F,ORF1a:N997S,ORF1a:T1001,ORF1a:A1708D,ORF1a:I2230T,ORF1a:M2259I,ORF1b:P218L,ORF1b:P314L,ORF8:Q27*,ORF8:R52I,ORF8:F73C,S:N501Y,S:A570D,S:D614G,S:P681H,S:T716I,S:S982A,S:D1118H                                                          | 6 | 266 |
| hCoV-19/Mexico/COA-LANGEBIO_IMSS_1381/2021     | EPI_ISL_2942509 | OL461374 | B.1.1.7 | GRY | T78G,C913T,C3037T,A3255G,C3267T,C5388A,C5986T,T6001C,G6653T,T6954C,A12555G,C14408T,C14676T,C15279T,T16176C,C18348T,C2677T,A23063T,C23271A,A23403G,C23604A,C23709T,T24506G,G24914C,G24971A,C27972T,G28048T,A28111G,G28280C,A28281T,T28282A,G2881A,G28882A,G28883C,C28977T,C29632T                                                                                                                                                                                                                                                        | N:D3L,N:R203K,N:G204R,N:S235F,ORF1a:N997S,ORF1a:T1001,ORF1a:A1708D,ORF1a:I2230T,ORF1a:M2259I,ORF1b:P218L,ORF1b:P314L,ORF8:Q27*,ORF8:R52I,ORF8:F73C,S:N501Y,S:A570D,S:D614G,S:P681H,S:T716I,S:S982A,S:D1118H                                                                  | 6 | 0   |
| hCoV-19/Mexico/COA-LANGEBIO_IMSS_1672/2021     | EPI_ISL_2942765 | OL461375 | B.1.1.7 | GRY | C241T,C913T,C3037T,A3255G,C3267T,C5388A,C5986T,T6001C,G6653T,T6954C,A12555G,C14408T,C14676T,C15279T,T16176C,C18348T,A23063T,C23271A,A23403G,C23604A,C23709T,T24506G,G24914C,G24971A,C27972T,G28048T,A28111G,G28280C,A28281T,T28282A,G2881A,G28882A,G28883C,C28977T,C29632T                                                                                                                                                                                                                                                              | N:D3L,N:R203K,N:G204R,N:S235F,ORF1a:N997S,ORF1a:T1001,ORF1a:A1708D,ORF1a:I2230T,ORF1a:M2259I,ORF1b:P218L,ORF1b:P314L,ORF8:Q27*,ORF8:R52I,ORF8:F73C,S:N501Y,S:A570D,S:D614G,S:P681H,S:T716I,S:S982A,S:D1118H                                                                  | 6 | 489 |
| hCoV-19/Mexico/COA-LANGEBIO_IMSS_1675/2021     | EPI_ISL_2942768 | OL461376 | B.1.1.7 | GRY | C241T,C913T,C3037T,C3267T,C5388A,C5986T,T6954C,G7042T,C7765T,C10156T,A10195G,C11199T,C12880T,C14120T,C14408T,C14676T,C15279T,C15933T,T16176C,G22104C,A23063T,C23271A,A23403G,C23604A,C23709T,T24506G,G24914C,G24971A,C27972T,G28048T,A28111G,G28280C,A28281T,T28282A,G2881A,G28882A,G28883C,C28977T,C29632T                                                                                                                                                                                                                             | N:D3L,N:R203K,N:G204R,N:S235F,ORF1a:N997S,ORF1a:T1001,ORF1a:A1708D,ORF1a:I2230T,ORF1a:M2259I,ORF1b:P218L,ORF1b:P314L,ORF8:Q27*,ORF8:R52I,ORF8:F73C,S:N501Y,S:A570D,S:D614G,S:P681H,S:T716I,S:S982A,S:D1118H                                                                  | 6 | 49  |



|                                            |                 |          |         |     |    |                                                                                                                                                                                                                                                                                                                                                                                                             |  |  |                                                                                                                                                                                                                                            |                                                                                                                                                                                                                                                                |     |
|--------------------------------------------|-----------------|----------|---------|-----|----|-------------------------------------------------------------------------------------------------------------------------------------------------------------------------------------------------------------------------------------------------------------------------------------------------------------------------------------------------------------------------------------------------------------|--|--|--------------------------------------------------------------------------------------------------------------------------------------------------------------------------------------------------------------------------------------------|----------------------------------------------------------------------------------------------------------------------------------------------------------------------------------------------------------------------------------------------------------------|-----|
|                                            |                 |          |         |     |    | C241T,C913T,C1380T,C3037T,A3255G,C3267T,C5388A,C5986T,T6001C,G6653T,T6954C,A12555 G,C14408T,C14676T,C15279T,T16176C,C17745T,C18348T,A23063T,C23271A,A23403G,C23604 A,C23709T,T24506G,G24914C,G24971A,C27972T,G28048T,A28111G,G28280C,A28281T,T2828 A,G28881A,G28882A,G28883C,C28977T,C29952T                                                                                                                |  |  | N:D3L:N:R203K,N:G204R,N:L230F,N:S235F,ORF1a:A372V,ORF1a:N9975,ORF1 a:T1001,ORF1a:A1708D,ORF1aV2130F,ORF1a:2203T,ORF1a:E4097G,ORF1b: P314L,ORF8:Q27*,ORF8:R52I,ORF8:Y73C,S:N501Y,S:A570D,S:D614G,S:P681H,S: T716I,S:S982A,S:D1118H,S:K1191N |                                                                                                                                                                                                                                                                |     |
| hCoV-19/Mexico/COA-LANGEBIO_IMSS_1696/2021 | EPI_ISL_2942785 | OL461377 | B.1.1.7 | GRY | 38 | 202T,C241T,C913T,G1820A,C3037T,C3267T,C5388A,C5986T,T6954C,G9526T,C11747T,A12162 G,C14408T,C14676T,C15279T,C15720T,T16176C,A17615G,T19363C,A21137G,A23063T,C23248 T,C23271A,A23403G,C23604A,C23709T,T24506G,G24914C,G25135T,C27972T,G28048T,A2811 1G,G28280C,A28281T,T28282A,G28881A,G28882A,G28883C,C28977T,C29095T,G29711T                                                                                |  |  | 24                                                                                                                                                                                                                                         | S:P681H,S:T716I,S:S982A,S:D1118H,S:K1191N                                                                                                                                                                                                                      | 137 |
| hCoV-19/Mexico/COL_LANGEBIO_IMSS_0767/2021 | EPI_ISL_2402178 | OL461378 | B.1.1.7 | GRY | 39 | C241T,C673T,C913T,C3037T,C3267T,C5388A,C5986T,T6954C,A12162G,A13169G,C14408T,C146 76T,C15279T,C15720T,T16176C,A17615G,C18747T,C20844T,A21137G,A23063T,C23271A,A234 03G,C23604A,C23709T,T24506G,G24914C,G25135T,C26110T,G26763T,C27972T,G28048T,A28 280C,A28281T,T28282A,G28881A,G28882A,G28883C,C28977T,C29095T,G29711T                                                                                     |  |  | 25                                                                                                                                                                                                                                         | D614G,S:P681H,S:T716I,S:S982A,S:D1118H,S:K1191N                                                                                                                                                                                                                | 1   |
| hCoV-19/Mexico/COL-IBT_IMSS_1847/2021      | EPI_ISL_2801720 | OL461379 | B.1.1.7 | GRY | 41 | C241T,C673T,C913T,C3037T,C3267T,C5388A,C5986T,T6954C,C11514T,A12162G,C12896T,C144 08T,C14676T,C15279T,C15720T,T16176C,A17615G,C18747T,G20683A,C20844T,A21137G,A230 63T,C23271A,A23403G,C23604A,C23709T,T24506G,G24914C,G25135T,C26110T,C27972T,G28                                                                                                                                                          |  |  | 26                                                                                                                                                                                                                                         | C,S:N501Y,S:A570D,S:D614G,S:P681H,S:T716I,S:S982A,S:D1118H,S:K1191N                                                                                                                                                                                            | 0   |
| hCoV-19/Mexico/COL-IBT_IMSS_1868/2021      | EPI_ISL_2801737 | OL461380 | B.1.1.7 | GRY | 41 | O48T,A28111G,G28280C,A28281T,T28282A,G28881A,G28882A,G28883C,C28977T,C29095T C241T,C673T,C913T,C3037T,C3267T,C5388A,C5986T,T6954C,A12162G,C14408T,C14676T,C152 79T,C15720T,T16176C,A17615G,C18747T,C20844T,A21137G,A23063T,C23271A,A23403G,C2 604A,C23709T,T24506G,G24914C,G25135T,C26110T,C27972T,G28048T,A28111G,G2                                                                                       |  |  | 26                                                                                                                                                                                                                                         | C,S:N501Y,S:A570D,S:D614G,S:P681H,S:T716I,S:S982A,S:D1118H,S:K1191N                                                                                                                                                                                            | 0   |
| hCoV-19/Mexico/COL-LANGEBIO_IMSS_1011/2021 | EPI_ISL_2671550 | OL461381 | B.1.1.7 | GRY | 40 | 8280C,A28281T,T28282A,G28881A,G28882A,G28883C,C28977T,C29095T,G29468C C241T,C673T,C913T,C3037T,C3267T,C5388A,C5986T,T6954C,A10323G,A12162G,C14408T,C146 76T,C15279T,C15720T,T16176C,A17615G,C18747T,C20844T,A21137G,A23063T,C23271A,A234 03G,C23604A,C23709T,T24506G,G24914C,G25135T,C26110T,C27972T,G28048T,A28111G,G28                                                                                    |  |  | 25                                                                                                                                                                                                                                         | D614G,S:P681H,S:T716I,S:S982A,S:D1118H,S:K1191N                                                                                                                                                                                                                | 0   |
| hCoV-19/Mexico/COL-LANGEBIO_IMSS_1033/2021 | EPI_ISL_2671554 | OL461382 | B.1.1.7 | GRY | 39 | 280C,A28281T,T28282A,G28881A,G28882A,G28883C,C28977T,C29095T C241T,C673T,C913T,C3037T,C3267T,C5388A,C5986T,T6954C,A12162G,C14408T,C14676T,C152 79T,C15720T,T16176C,A17615G,C18747T,C20844T,A21137G,A23063T,C23271A,A234 03G,C23604A,C23709T,T24506G,G24914C,G25135T,C26110T,C27972T,G28048T,A28111G,G28                                                                                                     |  |  | 24                                                                                                                                                                                                                                         | S:P681H,S:T716I,S:S982A,S:D1118H,S:K1191N                                                                                                                                                                                                                      | 0   |
| hCoV-19/Mexico/COL-LANGEBIO_IMSS_1045/2021 | EPI_ISL_2671556 | OL461383 | B.1.1.7 | GRY | 41 | C241T,C673T,C913T,C3037T,C3267T,C5388A,C5986T,T6954C,C12924T,C14408T,C14676T,C15 279T,C15720T,T16176C,A17615G,C18747T,C20844T,A21137G,A23063T,C23271A,A234 03G,C23604A,C23709T,T24506G,G24914C,G25135T,C26110T,C27972T,G28048T,A28111G,G28                                                                                                                                                                  |  |  | 25                                                                                                                                                                                                                                         | G14G,S:P681H,S:T716I,S:S982A,S:D1118H,S:K1191N                                                                                                                                                                                                                 | 0   |
| hCoV-19/Mexico/COL-LANGEBIO_IMSS_1046/2021 | EPI_ISL_2671557 | OL461384 | B.1.1.7 | GRY | 39 | 280C,A28281T,T28282A,G28881A,G28882A,G28883C,C28977T,C29095T C241T,C673T,C913T,C3037T,C3267T,C5388A,C5986T,T6954C,A12162G,C14408T,C14676T,C152 79T,C15720T,T16176C,A17615G,C18747T,C20844T,A21137G,A23063T,C23271A,A23403G,C2 3604A,C23709T,T24506G,G24914C,G25135T,C26110T,C27972T,G28048T,A28111G,G28                                                                                                     |  |  | 26                                                                                                                                                                                                                                         | C,S:N501Y,S:A570D,S:D614G,S:P681H,S:T716I,S:S982A,S:D1118H,S:K1191N                                                                                                                                                                                            | 0   |
| hCoV-19/Mexico/COL-LANGEBIO_IMSS_1266/2021 | EPI_ISL_2942424 | OL461385 | B.1.1.7 | GRY | 39 | A28281T,T28282A,G28881A,G28882A,G28883C,C28977T,C29095T,G29395T C241T,C913T,C3037T,C3267T,C5388A,C5986T,T6954C,C9611T,C14408T,C14649T,C146 76T,C15279T,T16176C,C18348T,A23063T,C23271A,A23403G,C23604A,C23709T,T24506G,G249 14C,C27972T,G28048T,A28111G,G28280C,A28281T,T28282A,G28881A,G28882A,G28883C,C2 8977T,C29095T,G29395T                                                                            |  |  | 25                                                                                                                                                                                                                                         | D614G,S:P681H,S:T716I,S:S982A,S:D1118H,S:K1191N                                                                                                                                                                                                                | 228 |
| hCoV-19/Mexico/DUR_IBT_IMSS_1409/2021      | EPI_ISL_2681086 | OL461386 | B.1.1.7 | GRY | 37 | C241T,C913T,C2110T,C3037T,C3267T,C5388A,C5986T,T6954C,C10747T,C1412 OT,C14408T,C14676T,C15279T,T16176C,C16323T,C17004T,C17518T,C19390T,A23063T,C23271 A,A23403G,C23604A,C23709T,T24506G,G24914C,G25135T,C26110T,C27972T,G28048T,A2809                                                                                                                                                                       |  |  | 20                                                                                                                                                                                                                                         | N:D3L:N:R203K,N:G204R,N:S235F,ORF1a:T1001,ORF1a:A1708D,ORF1a:2230 T,ORF1a:Q3966R,ORF1b:P314L,ORF1b:K1383R,ORF1b:S2557R,ORF3a:P240S, ORF3a:I246V,ORF8:Q27*,ORF8:R52I,ORF8:Y73C,S:D211L,S:N501Y,S:A570D,S: D614G,S:P681H,S:T716I,S:S982A,S:D1118H,S:K1191N       | 0   |
| hCoV-19/Mexico/DUR_INER_IMSS_1050/2021     | EPI_ISL_2490339 | OL461387 | B.1.1.7 | GRY | 41 | 5T,A28111G,C28146T,G28280C,A28281T,T28282A,G28881A,G28882A,G28883C,C28977T C222T,C241T,C913T,C2110T,C3037T,C3267T,C5388A,C5986T,T6954C,G7042T,C8127T,C14120T, C14408T,G14575T,C14676T,C15279T,T16176C,C17762T,C18060T,A23063T,C23271A,A23403G, C23604A,C23709T,T24506G,G24914C,G25135T,C27972T,G28048T,A28095T,A28111G,G28280 C,A28281T,T28282A,G28881A,G28882A,G28883C,C28977T                             |  |  | 24                                                                                                                                                                                                                                         | G14G,S:P681H,S:T716I,S:S982A,S:D1118H                                                                                                                                                                                                                          | 0   |
| hCoV-19/Mexico/DUR_LANGEBIO_IMSS_0551/2021 | EPI_ISL_2401974 | OL461388 | B.1.1.7 | GRY | 38 | C241T,C913T,C3037T,C3267T,T4711A,C5388A,C5986T,T6954C,C14408T,C14676T,C15279T,T161 76C,C16338T,C21622T,C22120T,A23063T,C23271A,A23403G,C23604A,C23709T,T24506G,G249 14C,C27972T,G28048T,A28111G,G28280C,A28281T,T28282A,G28881A,G28882A,G28883C,C2 8977T,C29095T,G29395T                                                                                                                                    |  |  | 24                                                                                                                                                                                                                                         | N:D3L:N:R203K,N:G204R,N:S235F,ORF1a:T1001,ORF1a:A1708D,ORF1a:2230 T,ORF1a:M2259I,ORF1a:A2621V,ORF1b:P314L,ORF1b:K1383R,ORF1b:V2406I,ORF1 b:K2557R,ORF3a:P240S,ORF8:Q27*,ORF8:R52I,ORF8:Y73C,S:N501Y,S:A570D, S:D614G,S:P681H,S:T716I,S:S982A,S:D1118H,S:K1191N | 12  |
| hCoV-19/Mexico/DUR_LANGEBIO_IMSS_0824/2021 | EPI_ISL_2671558 | OL461389 | B.1.1.7 | GRY | 33 | 06G,G24914C,C27972T,G28048T,A28111G,G28280C,A28281T,T28282A,G28881A,G28882A,G2 8883C,C241T,C913T,C1627T,C2110T,C3037T,C3267T,C5388A,C5986T,T6954C,G7042T,A10195G,C141 20T,C14408T,C14676T,C15279T,T16176C,C17762T,A23063T,C23271A,A23403G,C23604A,A2369 0G,C23709T,T24506G,G24914C,G25785T,T25903G,C27972T,G28048T,G28075T,A28095T,A2811 1G,G28280C,A28281T,T28282A,G28881A,G28882A,G28883C,C28977T,C29200T |  |  | 19                                                                                                                                                                                                                                         | S:P681H,S:T716I,S:S940F,S:S982A,S:D1118H                                                                                                                                                                                                                       | 234 |
| hCoV-19/Mexico/DUR_LANGEBIO_IMSS_0870/2021 | EPI_ISL_2671559 | OL461390 | B.1.1.7 | GRY | 40 | 91T,C2110T,C3037T,C3267T,C5388A,C5986T,T6954C,T7984C,C10747T,C14120T,C14 08T,C14676T,C15279T,T16176C,C16323T,C17004T,C17518T,C19390T,A23063T,C23271A,A234 03G,C23525T,C23604A,C23709T,T24506G,G24914C,C27972T,G28048T,A28111G,C28146T,G28 280C,A28281T,T28282A,G28881A,G28882A,G28883C,C28977T                                                                                                              |  |  | 26                                                                                                                                                                                                                                         | Y:S:A570D,S:D614G,S:P681H,S:N710D,S:T716I,S:S982A,S:D1118H                                                                                                                                                                                                     | 0   |
| hCoV-19/Mexico/DUR_LANGEBIO_IMSS_1371/2021 | EPI_ISL_2942501 | OL461391 | B.1.1.7 | GRY | 38 | C241T,C913T,C3037T,C3267T,C5388A,C5944T,C5986T,G6368A,T6954C,C9967T,C13585T,C1440 8T,C14676T,T15096G,C15279T,T16176C,A19719T,G21901A,C22987T,C22993T,A23063T,C232 71A,A23403G,C23604A,C23709T,T24506G,G24914C,G25440T,C25688T,C27972T,G28048T,A280                                                                                                                                                          |  |  | 23                                                                                                                                                                                                                                         | S:T716I,S:S982A,S:D1118H                                                                                                                                                                                                                                       | 25  |
| hCoV-19/Mexico/GRO-IBT_IMSS_1934/2021      | EPI_ISL_2801799 | OL461392 | B.1.1.7 | GRY | 41 | 95T,A28111G,G28280C,A28281T,T28282A,G28881A,G28882A,G28883C,C28977T C241T,C884T,C913T,C3037T,C3267T,A9394G,C5388A,C5986T,T6954C,A9869G,C11941T,C14408 T,C14676T,C15108T,C15279T,T16176C,T16905C,A17615G,C18032T,T20273A,C22498T,A23063T ,C23271A,A23403G,C23604A,C23709T,T24506G,G24914C,G26730C,C27143T,C27972T,G28048                                                                                     |  |  | 22                                                                                                                                                                                                                                         | A,S:D1118H                                                                                                                                                                                                                                                     | 586 |
| hCoV-19/Mexico/GRO-IBT_IMSS_2023/2021      | EPI_ISL_2801870 | OL461393 | B.1.1.7 | GRY | 41 | T,A28111G,G28280C,A28281T,T28282A,G28603T,G28881A,G28882A,G28883C,C28977T G913T,C2453T,C3037T,C3267T,C3784T,C5388A,C5986T,T6954C,A749G,C9611T,C14408T,C146 76T,C15279T,T16176C,G21372T,C21855T,G21974C,A23063T,C23271A,A23403G,C23604A,C2 709T,T24506G,G24914C,C27972T,G28048T,A28111G,G28280C,A28281T,T28282A,A28295G,G2                                                                                   |  |  | 24                                                                                                                                                                                                                                         | D614G,S:P681H,S:T716I,S:S982A,S:D1118H                                                                                                                                                                                                                         | 0   |
| hCoV-19/Mexico/GRO-IBT_IMSS_1391/2021      | EPI_ISL_2942518 | OL461394 | B.1.1.7 | GRY | 35 | 8881A,G28882A,G28883C,C28977T C241T,C913T,C2110T,C2841T,C3037T,C3267T,C5388A,C5986T,T6954C,G7042T,C14120T,C1440 8T,C14676T,C15279T,T16176C,T17583G,A23063T,C23271A,A23403G,C23604A,C23709T,C2398 7T,T24506G,G24914C,C25624T,C27972T,G28048T,A28095T,A28111G,G28280C,A28281T,T282 82A,G28881A,G28882A,G28883C,C28977T                                                                                        |  |  | 25                                                                                                                                                                                                                                         | D614G,S:P681H,S:T716I,S:S982A,S:D1118H                                                                                                                                                                                                                         | 32  |
| hCoV-19/Mexico/GUA_INER_IMSS_00836/2021    | EPI_ISL_2901287 | OL461395 | B.1.1.7 | GRY | 36 | C241T,C913T,C2453T,C3037T,C3267T,C5388A,C5986T,T6954C,C9611T,C14408T,C14676T,C152 79T,T16176C,C21855T,G21974C,A23063T,C23271A,A23403G,C23604A,C23709T,T24506G,G24 914C,C27972T,G28048T,A28111G,G28280C,A28281T,T28282A,A28295G,G28881A,G28882A,G2                                                                                                                                                           |  |  | 24                                                                                                                                                                                                                                         | S:T716I,S:P8095,S:S982A,S:D1118H                                                                                                                                                                                                                               | 0   |
| hCoV-19/Mexico/GUA_INER_IMSS_00867/2021    | EPI_ISL_2091318 | OL461396 | B.1.1.7 | GRY | 33 | 914C,C27972T,G28048T,A28111G,G28280C,A28281T,T28282A,A28295G,G28881A,G28882A,G2                                                                                                                                                                                                                                                                                                                             |  |  | 23                                                                                                                                                                                                                                         | R:R:Y73C,S:S98F,S:D138H,S:N501Y,S:A570D,S:D614G,S:P681H,S:T716I,S:S982                                                                                                                                                                                         | 0   |

|                                            |                 |          |         |     |    |                                                                                                                                                                                                                                                                                                             |                                                                                                                                                                                                                            |   |     |
|--------------------------------------------|-----------------|----------|---------|-----|----|-------------------------------------------------------------------------------------------------------------------------------------------------------------------------------------------------------------------------------------------------------------------------------------------------------------|----------------------------------------------------------------------------------------------------------------------------------------------------------------------------------------------------------------------------|---|-----|
| hCoV-19/Mexico/GUA-LANGEBIO_IMSS_1001/2021 | EPI_ISL_2671564 | OL461397 | B.1.1.7 | GRY | 34 | C241T,C913T,C2453T,C3037T,C3267T,C3692T,C5388A,C5986T,T6954C,C9611T,C14408T,C14676T,C15279T,T16176C,C21855T,G21974C,A23063T,C23271A,A23403G,C23604A,C23709T,T24506G,G24914C,C27972T,G28048T,A28111G,G28280C,A28281T,T28282A,A28295G,G28881A,G28882A,G28883C,C28977T                                         | N:D3L:N:N8D,N:R203K,N:G204R,N:S235F,ORF1a:1730F,ORF1a:T1001,ORF1a:V1143F,ORF1a:A1708D,ORF1a:I2230T,ORF1a:L3116F,ORF1b:P314L,ORF8:Q27*,ORF8:R52I,ORF8:Y73C,S598F,S:D138H,S:N501Y,S:A570D,S:D614G,S:P681H                    | 6 | 0   |
| hCoV-19/Mexico/GUA-LANGEBIO_IMSS_1003/2021 | EPI_ISL_2671565 | OL461398 | B.1.1.7 | GRY | 34 | C241T,C913T,C2453T,C3037T,C3267T,C3966T,C5388A,C5986T,T6954C,C9611T,C14408T,C14676T,C15279T,T16176C,C21855T,G21974C,A23063T,C23271A,A23403G,C23604A,C23709T,T24506G,G24914C,C27972T,G28048T,A28111G,G28280C,A28281T,T28282A,A28295G,G28881A,G28882A,G28883C,C28977T                                         | N:D3L:N:N8D,N:R203K,N:G204R,N:S235F,ORF1a:1730F,ORF1a:T1001,ORF1a:A1234V,ORF1a:A1708D,ORF1a:I2230T,ORF1a:L3116F,ORF1b:P314L,ORF8:Q27*,ORF8:R52I,ORF8:Y73C,S598F,S:D138H,S:N501Y,S:A570D,S:D614G,S:P681H                    | 6 | 0   |
| hCoV-19/Mexico/GUA-LANGEBIO_IMSS_1013/2021 | EPI_ISL_2671567 | OL461399 | B.1.1.7 | GRY | 34 | C241T,C913T,C2453T,C3037T,C3267T,C3653T,A5311C,C5388A,C5986T,C6196T,T6954C,A8848G,C14408T,T,C14676T,C15279T,T16176C,A23063T,C23271A,A23403G,C23604A,C23709T,T24506G,G24914C,C27972T,G28048T,A28111G,G28280C,A28281T,T28282A,G28881A,G28882A,G28883C,C28977T                                                 | N:D3L:N:R203K,N:G204R,N:S235F,ORF1a:T1001,ORF1a:I1130F,ORF1a:A1708D,ORF1a:I2230T,ORF1b:P314L,ORF8:Q27*,ORF8:R52I,ORF8:Y73C,S598F,S:D138H,S:N501Y,S:A570D,S:D614G,S:P681H                                                   | 6 | 2   |
| hCoV-19/Mexico/HID-LANGEBIO_IMSS_1451/2021 | EPI_ISL_2942571 | OL461400 | B.1.1.7 | GRY | 37 | 2A,A28295G,G28881A,G28882A,G28883C,C28977T                                                                                                                                                                                                                                                                  | N:D3L:N:R203K,N:G204R,N:S235F,ORF1a:T1001,ORF1a:A1708D,ORF1a:I2230T,ORF1b:P314L,ORF8:Q27*,ORF8:R52I,ORF8:Y73C,S598F,S:D138H,S:N501Y,S:A570D,S:D614G,S:P681H                                                                | 6 | 0   |
| hCoV-19/Mexico/JAL_INER_IMSS_00822/2021    | EPI_ISL_2091273 | OL461401 | B.1.1.7 | GRY | 34 | 217T,G26727T,C27972T,G28048T,A28111G,G28280C,A28281T,T28282A,G28881A,G28882A,G28883C,C28977T                                                                                                                                                                                                                | N:D3L:N:R203K,N:G204R,N:S235F,ORF1a:T1001,ORF1a:P1220L,ORF1a:A1708D,ORF1a:I2230T,ORF1b:P314L,ORF8:Q27*,ORF8:R52I,ORF8:Y73C,S598F,S:D138H,S:N501Y,S:A570D,S:D614G,S:P681H                                                   | 6 | 0   |
| hCoV-19/Mexico/JAL_LANGEBIO_IMSS_0755/2021 | EPI_ISL_2042166 | OL461402 | B.1.1.7 | GRY | 38 | 280C,A28281T,T28282A,G28881A,G28882A,G28883C,C28977T                                                                                                                                                                                                                                                        | N:D3L:N:R203K,N:G204R,N:S235F,ORF1a:T1001,ORF1a:A1708D,ORF1a:I2230T,ORF1a:M3087,ORF1a:Q3966G,ORF1b:P314L,ORF1b:K1383R,ORF1b:K2557R,ORF8:Q27*,ORF8:R52I,ORF8:Y73C,S598F,S:D138H,S:N501Y,S:A570D,S:D614G,S:P681H             | 6 | 0   |
| hCoV-19/Mexico/JAL-IBT_IMSS_1852/2021      | EPI_ISL_2801725 | OL461403 | B.1.1.7 | GRY | 40 | C241T,C913T,C2453T,C3037T,C3267T,C3966T,G4499T,T6954C,C14408T,C14676T,C15279T,T16176C,G17280T,A18992G,A23063T,C23271A,A23403G,C23604A,C23709T,T24506G,G24914C,C2553T,C27689T,C27972T,G28048T,A28111G,G28280C,A28281T,T28282A,C28310T,G28881A,G28882A,G28883C,C28977T                                        | N:D3L:N:P135,N:R203K,N:G204R,N:S235F,ORF1a:T1001,ORF1a:A1708D,ORF1a:I2230T,ORF1b:P314L,ORF1b:K1842R,ORF3a:A54V,ORF7a:P99L,ORF8:Q27*,ORF8:R52I,ORF8:Y73C,S598F,S:N501Y,S:A570D,S:D614G,S:P681H                              | 6 | 482 |
| hCoV-19/Mexico/JAL-IBT_IMSS_1881/2021      | EPI_ISL_2801747 | OL461404 | B.1.1.7 | GRY | 35 | C203T,C241T,C913T,G1820A,C3037T,C3267T,C5310T,C5388A,C5986T,T6954C,C7843T,G9526T,G11042T,A12162G,C14408T,C14676T,C15279T,C15720T,T16176C,A17615G,T19363C,A21137G,A23063T,C23248T,G28048T,A28111G,G28280C,A28281T,T28282A,G28881A,G28882A,G28883C,C28977T                                                    | N:D3L:N:R203K,N:G204R,N:S235F,ORF1a:G5195,ORF1a:T1001,ORF1a:A1708D,ORF1a:I2230T,ORF1a:M3087,ORF1a:Q3966G,ORF1b:P314L,ORF1b:K1383R,ORF1b:K2557R,ORF8:Q27*,ORF8:R52I,ORF8:Y73C,S598F,S:D138H,S:N501Y,S:A570D,S:D614G,S:P681H | 6 | 0   |
| hCoV-19/Mexico/JAL-LANGEBIO_IMSS_1009/2021 | EPI_ISL_2671572 | OL461405 | B.1.1.7 | GRY | 41 | T,G28048T,A28111G,G28280C,A28281T,T28282A,G28881A,G28882A,G28883C,C28977T                                                                                                                                                                                                                                   | N:D3L:N:R203K,N:G204R,N:S235F,ORF1a:T1001,ORF1a:A1708D,ORF1a:I2230T,ORF1a:M3087,ORF1a:Q3966G,ORF1b:P314L,ORF1b:K1383R,ORF1b:K2557R,ORF8:Q27*,ORF8:R52I,ORF8:Y73C,S598F,S:D138H,S:N501Y,S:A570D,S:D614G,S:P681H             | 6 | 0   |
| hCoV-19/Mexico/JAL-LANGEBIO_IMSS_1015/2021 | EPI_ISL_2671573 | OL461406 | B.1.1.7 | GRY | 40 | C241T,C913T,C2453T,C3037T,C3267T,T4579A,C5388A,C5986T,T6954C,G9526T,A12162G,C14408T,C14676T,C15279T,C15720T,T16176C,A17615G,T19363C,A21137G,A23063T,C23248T,C23271A,A23403G,C23604A,C23709T,T24506G,G24914C,G25135T,T27053C,C27972T,G28048T,A28111G,G28280C,A28281T,T28282A,G28881A,G28882A,G28883C,C28977T | N:D3L:N:R203K,N:G204R,N:S235F,ORF1a:T1001,ORF1a:A1708D,ORF1a:I2230T,ORF1a:M3087,ORF1a:Q3966G,ORF1b:P314L,ORF1b:K1383R,ORF1b:K2557R,ORF8:Q27*,ORF8:R52I,ORF8:Y73C,S598F,S:D138H,S:N501Y,S:A570D,S:D614G,S:P681H             | 6 | 0   |
| hCoV-19/Mexico/JAL-LANGEBIO_IMSS_1024/2021 | EPI_ISL_2671577 | OL461407 | B.1.1.7 | GRY | 37 | 82A,A28295G,G28881A,G28882A,G28883C,C28977T                                                                                                                                                                                                                                                                 | N:D3L:N:N8D,N:R203K,N:G204R,N:S235F,ORF1a:1730F,ORF1a:T1001,ORF1a:V1262F,ORF1a:I2230T,ORF1b:P314L,ORF1b:K1842R,ORF3a:A54V,ORF7a:P99L,ORF8:Q27*,ORF8:R52I,ORF8:Y73C,S598F,S:N501Y,S:A570D,S:D614G,S:P681H                   | 6 | 5   |
| hCoV-19/Mexico/JAL-LANGEBIO_IMSS_1032/2021 | EPI_ISL_2671581 | OL461408 | B.1.1.7 | GRY | 38 | C241T,C913T,C3037T,C3267T,G5150T,C5388A,C5986T,T6954C,C11750T,C14408T,C14676T,C15279T,T16176C,A23063T,C3086T,C23271A,A23403G,C23604A,C23709T,G24173T,T24506G,G24914C,C26833T,C26873T,C27972T,G28048T,A28111G,G28280C,A28281T,T28282A,G28881A,G28882A,G28883C,C28977T                                        | N:D3L:N:R203K,N:G204R,N:S235F,ORF1a:T1001,ORF1a:A1708D,ORF1a:I2230T,ORF1a:M2259I,ORF1b:T17I,ORF1b:P218L,ORF1b:A1708D,ORF1b:V2686I,ORF8:Q27*,ORF8:R52I,ORF8:Y73C,S598F,S:D138H,S:N501Y,S:A570D,S:D614G,S:P681H              | 6 | 6   |
| hCoV-19/Mexico/JAL-LANGEBIO_IMSS_1247/2021 | EPI_ISL_2942408 | OL461409 | B.1.1.7 | GRY | 35 | 28882A,G28883C,C28977T,C29614T                                                                                                                                                                                                                                                                              | N:A104V,N:D3L:N:R203K,N:G204R,N:S235F,ORF1a:T1001,ORF1a:V1629F,ORF1a:A1708D,ORF1a:I2230T,ORF1a:L3829F,ORF1b:P314L,ORF8:Q27*,ORF8:R52I,ORF8:Y73C,S598F,S:N501Y,S:A570D,S:D614G,S:P681H                                      | 6 | 9   |
| hCoV-19/Mexico/JAL-LANGEBIO_IMSS_1257/2021 | EPI_ISL_2942416 | OL461410 | B.1.1.7 | GRY | 43 | 28883C,C28977T                                                                                                                                                                                                                                                                                              | N:D3L:N:R203K,N:G204R,N:S235F,ORF1a:T1001,ORF1a:A1708D,ORF1a:I2230T,ORF1a:M2259I,ORF1b:T17I,ORF1b:P218L,ORF1b:A1708D,ORF1b:V2686I,ORF8:Q27*,ORF8:R52I,ORF8:Y73C,S598F,S:D138H,S:N501Y,S:A570D,S:D614G,S:P681H              | 6 | 40  |
| hCoV-19/Mexico/JAL-LANGEBIO_IMSS_1281/2021 | EPI_ISL_2942436 | OL461411 | B.1.1.7 | GRY | 44 | 8883C,C28977T,C29619T                                                                                                                                                                                                                                                                                       | N:D3L:N:R203K,N:G204R,N:S235F,ORF1a:T1001,ORF1a:A1708D,ORF1a:I2230T,ORF1a:M2259I,ORF1b:T17I,ORF1b:P218L,ORF1b:A1708D,ORF1b:V2686I,ORF8:Q27*,ORF8:R52I,ORF8:Y73C,S598F,S:D138H,S:N501Y,S:A570D,S:D614G,S:P681H              | 6 | 4   |
| hCoV-19/Mexico/JAL-LANGEBIO_IMSS_1317/2021 | EPI_ISL_2942464 | OL461412 | B.1.1.7 | GRY | 44 | G28048T,A28111G,G28280C,A28281T,T28282A,A28666G,G28881A,G28882A,G28883C,C28977T                                                                                                                                                                                                                             | N:D3L:N:R203K,N:G204R,N:S235F,ORF1a:T1001,ORF1a:A1708D,ORF1a:I2230T,ORF1a:M2259I,ORF1b:T17I,ORF1b:P218L,ORF1b:A1708D,ORF1b:V2686I,ORF8:Q27*,ORF8:R52I,ORF8:Y73C,S598F,S:D138H,S:N501Y,S:A570D,S:D614G,S:P681H              | 6 | 15  |
| hCoV-19/Mexico/JAL-LANGEBIO_IMSS_1621/2021 | EPI_ISL_2942725 | OL461413 | B.1.1.7 | GRY | 43 | 83C,C28977T                                                                                                                                                                                                                                                                                                 | N:D3L:N:R203K,N:G204R,N:S235F,ORF1a:T1001,ORF1a:A1708D,ORF1a:I2230T,ORF1a:M2259I,ORF1b:T17I,ORF1b:P218L,ORF1b:A1708D,ORF1b:V2686I,ORF8:Q27*,ORF8:R52I,ORF8:Y73C,S598F,S:D138H,S:N501Y,S:A570D,S:D614G,S:P681H              | 6 | 485 |
| hCoV-19/Mexico/MEX_IBT_IMSS_1135/2021      | EPI_ISL_2391531 | OL461414 | B.1.1.7 | GRY | 35 | 28882A,G28883C,C28977T,C29642T                                                                                                                                                                                                                                                                              | N:D3L:N:R203K,N:G204R,N:S235F,ORF1a:T1001,ORF1a:A1708D,ORF1a:I2230T,ORF1b:P314L,ORF8:Q27*,ORF8:R52I,ORF8:Y73C,S598F,S:N501Y,S:A570D,S:D614G,S:P681H                                                                        | 6 | 0   |
| hCoV-19/Mexico/MEX_IBT_IMSS_1249/2021      | EPI_ISL_2391647 | OL461415 | B.1.1.7 | GRY | 35 | 8882A,G28883C,C28977T,G29175T                                                                                                                                                                                                                                                                               | N:D3L:N:R203K,N:G204R,N:S235F,ORF1a:T1001,ORF1a:A1708D,ORF1a:I2230T,ORF1b:P314L,ORF8:Q27*,ORF8:R52I,ORF8:Y73C,S598F,S:N501Y,S:A570D,S:D614G,S:P681H                                                                        | 6 | 254 |



|                                                |                 |          |         |     |    |                                                                                                                                                                                                                                                                                                                                                                                                                                            |                                                                                                                                                                                                                                                                                                                                                                                                                                                                                                                                                                                                                                                                                                                                     |                                                                                                                                                                                                                                            |     |     |
|------------------------------------------------|-----------------|----------|---------|-----|----|--------------------------------------------------------------------------------------------------------------------------------------------------------------------------------------------------------------------------------------------------------------------------------------------------------------------------------------------------------------------------------------------------------------------------------------------|-------------------------------------------------------------------------------------------------------------------------------------------------------------------------------------------------------------------------------------------------------------------------------------------------------------------------------------------------------------------------------------------------------------------------------------------------------------------------------------------------------------------------------------------------------------------------------------------------------------------------------------------------------------------------------------------------------------------------------------|--------------------------------------------------------------------------------------------------------------------------------------------------------------------------------------------------------------------------------------------|-----|-----|
| hCoV-19/Mexico/MEX_IBT_IMSS_1512/2021          | EPI_ISL_2681069 | OL461416 | B.1.1.7 | GRY | 39 | C241T,C913T,G1957A,C2189T,A2276G,G2527A,C3037T,A3094T,C3267T,G4136T,C5388A,C5986 T,76954C,C11704T,C14408T,C14676T,C15279T,T16176C,G19542T,G22841A,A23063T,C23271A, A23403G,C23604A,C23709T,T24506G,G24914C,G25954T,C27972T,G28048T,A28111G,G28280 C,A28281T,T28282A,C28744T,G28881A,G28882A,G28883C,C28977T                                                                                                                                | N:D3L:N:R203K,N:G204R,N:S235F,ORF1a:L642F,ORF1a:H671V,ORF1a:T1001,O RFla:V1291F,ORF1a:A1708D,ORF1a:I2230T,ORF1b:P314L,ORF1b:M2025I,OR F3a:G188C,ORF8:Q27*,ORF8:R52I,ORF8:Y73C,S:D427N,S:N501Y,S:A570D,S:D6 14G,S:P681H,S:T716I,S:S982A,S:D1118H                                                                                                                                                                                                                                                                                                                                                                                                                                                                                     | 6                                                                                                                                                                                                                                          | 1   |     |
| hCoV-19/Mexico/MEX_IBT_IMSS_1513/2021          | EPI_ISL_2681215 | OL461417 | B.1.1.7 | GRY | 39 | C241T,C913T,G1957A,C2189T,A2276G,G2527A,C3037T,A3094T,C3267T,G4136T,C5388A,C5986 T,76954C,C11704T,C14408T,C14676T,C15279T,T16176C,G19542T,G22841A,A23063T,C23271A, A23403G,C23604A,C23709T,T24506G,G24914C,G25954T,C27972T,G28048T,A28111G,G28280 C,A28281T,T28282A,C28744T,G28881A,G28882A,G28883C,C28977T                                                                                                                                | N:D3L:N:R203K,N:G204R,N:S235F,ORF1a:L642F,ORF1a:H671V,ORF1a:T1001,O RFla:V1291F,ORF1a:A1708D,ORF1a:I2230T,ORF1b:P314L,ORF1b:M2025I,OR F3a:G188C,ORF8:Q27*,ORF8:R52I,ORF8:Y73C,S:D427N,S:N501Y,S:A570D,S:D6 14G,S:P681H,S:T716I,S:S982A,S:D1118H                                                                                                                                                                                                                                                                                                                                                                                                                                                                                     | 6                                                                                                                                                                                                                                          | 55  |     |
| hCoV-19/Mexico/MEX_IBT_IMSS_1571/2021          | EPI_ISL_2681111 | OL461418 | B.1.1.7 | GRY | 41 | C241T,C913T,G1069A,C1609T,C3037T,T3049C,C3267T,C5388A,G5558A,C5986T,76954C,C8655T A12162G,G14294A,C14408T,C14676T,C15279T,C15720T,T16176C,A17615G,C18329T,A21137 G,A23063T,C23271A,A23403G,C23604A,C23709T,T24506G,G24914C,G25135T,C27972T,G2804 8T,A28111G,G28280C,A28281T,T28282A,G28881A,G28882A,G28883C,G28916A,C28977T                                                                                                                | N:D3L:N:R203K,N:G204R,N:G2155N,S235F,ORF1a:T1001,ORF1a:A1708D,OR F1a:V1765I,ORF1a:I2230T,ORF1a:S2797F,ORF1a:Q3966R,ORF1b:R276H,ORF1 b:P314L,ORF1b:K1383R,ORF1b:T1621I,ORF1b:K2557R,ORF8:Q27*,ORF8:R52I T,ORF8:Y73C,S:N501Y,S:A570D,S:D614G,S:P681H,S:T716I,S:S982A,S:D1118H,S: N:D3L:N:R203K,N:G204R,N:S235F,ORF1a:G519S,ORF1a:T1001,ORF1a:A1708 D,ORF1a:V1887I,ORF1a:I2230T,ORF1a:M3087I,ORF1a:Q3966R,ORF1b:P314L, ORF1b:K1383R,ORF1b:K2557R,ORF8:Q27*,ORF8:R52I,ORF8:Y73C,S:N501Y,S:A 570D,S:D614G,S:P681H,S:T716I,S:S982A,S:D1118H,S:ET9I,N:D3L:N:R203K,N:G204R,N:S235F,ORF1a:T1001,ORF1a:A1708D,ORF1a:I 2230T,ORF1a:I3829F,ORF1b:P314L,ORF1b:Q27*,ORF8:R52I,ORF8:Y73C,S:N501 Y,S:A570D,S:D614G,S:P681H,S:T716I,S:S982A,S:D1118H | 6                                                                                                                                                                                                                                          | 128 |     |
| hCoV-19/Mexico/MEX_IBT_IMSS_1667/2021          | EPI_ISL_2681238 | OL461419 | B.1.1.7 | GRY | 39 | 1G,G28280C,A28281T,T28282A,G28881A,G28882A,G28883C,C28977T                                                                                                                                                                                                                                                                                                                                                                                 | 25                                                                                                                                                                                                                                                                                                                                                                                                                                                                                                                                                                                                                                                                                                                                  | 70D,S:D614G,S:P681H,S:T716I,S:S982A,S:D1118H,S:ET9I,N:D3L:N:R203K,N:G204R,N:S235F,ORF1a:T1001,ORF1a:A1708D,ORF1a:I 2230T,ORF1a:I3829F,ORF1b:P314L,ORF1b:Q27*,ORF8:R52I,ORF8:Y73C,S:N501 Y,S:A570D,S:D614G,S:P681H,S:T716I,S:S982A,S:D1118H | 6   | 0   |
| hCoV-19/Mexico/MEX_INER_IMSS_00690/2021        | EPI_ISL_2091146 | OL461420 | B.1.1.7 | GRY | 31 | 27972T,G28048T,A28111G,G28280C,A28281T,T28282A,G28881A,G28882A,G28883C,C28977T                                                                                                                                                                                                                                                                                                                                                             | 20                                                                                                                                                                                                                                                                                                                                                                                                                                                                                                                                                                                                                                                                                                                                  | Y:S:A570D,S:D614G,S:P681H,S:T716I,S:S982A,S:D1118H                                                                                                                                                                                         | 6   | 0   |
| hCoV-19/Mexico/MEX_LANGEBIO_IMSS_20813-NC/2021 | EPI_ISL_2969962 | OL461421 | B.1.1.7 | GRY | 35 | G2882A,G28883C,C28977T,C29642T                                                                                                                                                                                                                                                                                                                                                                                                             | 22                                                                                                                                                                                                                                                                                                                                                                                                                                                                                                                                                                                                                                                                                                                                  | 118H                                                                                                                                                                                                                                       | 6   | 996 |
| hCoV-19/Mexico/MEX-IBT_IMSS_14917-NC/2021      | EPI_ISL_2801753 | OL461422 | B.1.1.7 | GRY | 36 | 28282A,G28881A,G28882A,G28883C,C28977T                                                                                                                                                                                                                                                                                                                                                                                                     | 23                                                                                                                                                                                                                                                                                                                                                                                                                                                                                                                                                                                                                                                                                                                                  | P681H,S:T716I,S:D1118H                                                                                                                                                                                                                     | 6   | 879 |
| hCoV-19/Mexico/MEX-LANGEBIO_IMSS_1085/2021     | EPI_ISL_2671594 | OL461423 | B.1.1.7 | GRY | 38 | 82A,A28466G,G28881A,G28882A,G28883C,C28977T,C29642T                                                                                                                                                                                                                                                                                                                                                                                        | 23                                                                                                                                                                                                                                                                                                                                                                                                                                                                                                                                                                                                                                                                                                                                  | 82A,S:D1118H                                                                                                                                                                                                                               | 6   | 0   |
| hCoV-19/Mexico/MEX-LANGEBIO_IMSS_1114/2021     | EPI_ISL_2671601 | OL461424 | B.1.1.7 | GRY | 39 | C913T,C3037T,C3267T,C5388A,C5986T,76954C,C14408T,C14676T,C15279T,T16176C,C 18555T,C21639A,A23063T,C23271A,A23403G,C23604A,C23709T,C24374T,T24506G,G24914C, C27972T,G28048T,A28111G,G28280C,A28281T,T28282A,G28881A,G28882A,G28883C,C28977T                                                                                                                                                                                                 | 25                                                                                                                                                                                                                                                                                                                                                                                                                                                                                                                                                                                                                                                                                                                                  | 501Y,S:A570D,S:D614G,S:P681H,S:T716I,S:S982A,S:D1118H                                                                                                                                                                                      | 6   | 1   |
| hCoV-19/Mexico/MEX-LANGEBIO_IMSS_1121/2021     | EPI_ISL_2671605 | OL461425 | B.1.1.7 | GRY | 32 | C27972T,G28048T,A28111G,G28280C,A28281T,T28282A,G28881A,G28882A,G28883C,C28977T                                                                                                                                                                                                                                                                                                                                                            | 25                                                                                                                                                                                                                                                                                                                                                                                                                                                                                                                                                                                                                                                                                                                                  | 501Y,S:A570D,S:D614G,S:P681H,S:T716I,S:S982A,S:D1118H                                                                                                                                                                                      | 6   | 1   |
| hCoV-19/Mexico/MEX-LANGEBIO_IMSS_1474/2021     | EPI_ISL_2942592 | OL461426 | B.1.1.7 | GRY | 28 | 111G,G28280C,A28281T,T28282A,G28881A,G28882A,G28883C,C28977T,C29167T                                                                                                                                                                                                                                                                                                                                                                       | 25                                                                                                                                                                                                                                                                                                                                                                                                                                                                                                                                                                                                                                                                                                                                  | 501Y,S:A570D,S:D614G,S:P681H,S:T716I,S:S982A,S:D1118H                                                                                                                                                                                      | 6   | 1   |
| hCoV-19/Mexico/MEX-LANGEBIO_IMSS_1475/2021     | EPI_ISL_2942593 | OL461427 | B.1.1.7 | GRY | 28 | 111G,G28280C,A28281T,T28282A,G28881A,G28882A,G28883C,C28977T,C29167T                                                                                                                                                                                                                                                                                                                                                                       | 25                                                                                                                                                                                                                                                                                                                                                                                                                                                                                                                                                                                                                                                                                                                                  | 501Y,S:A570D,S:D614G,S:P681H,S:T716I,S:S982A,S:D1118H                                                                                                                                                                                      | 6   | 0   |
| hCoV-19/Mexico/MEX-LANGEBIO_IMSS_1476/2021     | EPI_ISL_2942594 | OL461428 | B.1.1.7 | GRY | 42 | 811T,T28282A,G28881A,G28882A,G28883C,C28977T                                                                                                                                                                                                                                                                                                                                                                                               | 25                                                                                                                                                                                                                                                                                                                                                                                                                                                                                                                                                                                                                                                                                                                                  | 501Y,S:A570D,S:D614G,S:P681H,S:T716I,S:S982A,S:D1118H                                                                                                                                                                                      | 6   | 8   |
| hCoV-19/Mexico/MEX-LANGEBIO_IMSS_1479/2021     | EPI_ISL_2942596 | OL461429 | B.1.1.7 | G   | 34 | 11G,A28804G,C28932T                                                                                                                                                                                                                                                                                                                                                                                                                        | 22                                                                                                                                                                                                                                                                                                                                                                                                                                                                                                                                                                                                                                                                                                                                  | 1H,S:T716I,S:S982A,S:D1118H                                                                                                                                                                                                                | 6   | 2   |
| hCoV-19/Mexico/MEX-LANGEBIO_IMSS_1576/2021     | EPI_ISL_2942687 | OL461430 | B.1.1.7 | GRY | 39 | T28282A,G28881A,G28882A,G28883C,C28977T                                                                                                                                                                                                                                                                                                                                                                                                    | 22                                                                                                                                                                                                                                                                                                                                                                                                                                                                                                                                                                                                                                                                                                                                  | 282A                                                                                                                                                                                                                                       | 6   | 0   |
| hCoV-19/Mexico/MIC_INER_IMSS_1184/2021         | EPI_ISL_2490332 | OL461431 | B.1.1.7 | GRY | 39 | 8280C,A28281T,T28282A,G28881A,G28882A,G28883C,C2891T,C28977T                                                                                                                                                                                                                                                                                                                                                                               | 25                                                                                                                                                                                                                                                                                                                                                                                                                                                                                                                                                                                                                                                                                                                                  | 1H,S:T716I,S:A8455,S:S982A,S:D1118H,S:K1191N                                                                                                                                                                                               | 6   | 1   |
| hCoV-19/Mexico/MOR_IBT_IMSS_1570/2021          | EPI_ISL_2681243 | OL461432 | B.1.1.7 | GRY | 38 | 280C,A28281T,T28282A,G28881A,G28882A,G28883C,C28977T                                                                                                                                                                                                                                                                                                                                                                                       | 25                                                                                                                                                                                                                                                                                                                                                                                                                                                                                                                                                                                                                                                                                                                                  | Y:S:A570D,S:D614G,S:H655Y,S:P681H,S:T716I,S:S982A,S:D1118H                                                                                                                                                                                 | 6   | 253 |
| hCoV-19/Mexico/MOR_LANGEBIO_IMSS_91231-NC/2021 | EPI_ISL_2969986 | OL461433 | B.1.1.7 | GRY | 33 | G26730C,C27972T,G28048T,A28111G,G28280C,A28281T,T28282A,C28603T,G28881A,G28882 C241T,C622T,C913T,C3037T,C3267T,C5388A,C5986T,C6706T,76954C,C8950T,C14408T,C14676T C15279T,T16176C,C16323T,C16750T,G17122A,C19524T,C21234T,C21575T,A21993T,A22834G, A23063T,C23271A,C23403G,C23525T,C23604A,C23709T,T24506G,G24914T,G25526T,G25690 C,A25844T,C25747T,C27972T,G28048T,A28111G,G28280C,A28281T,T28282A,G28881A,G28882A,G28883C,C2891T,C28977T | 21                                                                                                                                                                                                                                                                                                                                                                                                                                                                                                                                                                                                                                                                                                                                  | ORF8:Y73C,S:N501Y,S:A570D,S:D614G,S:P681H,S:T716I,S:S982A,S:D1118H                                                                                                                                                                         | 6   | 979 |
| hCoV-19/Mexico/NAY_IBT_IMSS_1850/2021          | EPI_ISL_2801723 | OL461434 | B.1.1.7 | GR  | 45 | A25844T,C25747T,C27972T,G28048T,A28111G,G28280C,A28281T,T28282A,G28881A,G28882 C241T,C913T,C2110T,C3037T,C3267T,C5175T,C5388A,C5986T,76954C,T7984C,C14120T,C1440 8T,C14676T,C15279T,T16176C,C19390T,T19866C,G21123T,A23063T,C23271A,A23403G,C2360 4A,C23709T,T24506G,G24914C,C27972T,G28048T,A28095T,A28111G,G28280C,A28281T,T282 82A,G28881A,G28882A,G28883C,C28977T                                                                      | 21                                                                                                                                                                                                                                                                                                                                                                                                                                                                                                                                                                                                                                                                                                                                  | ORF1a:I2230T,ORF1b:P314L,ORF1b:K1383R,ORF1b:T1521I,ORF8:Q27*,ORF8:R52I,ORF8:Y73C,S:N501Y,S:A570D,S:D614G,S:P681H,S:T716I,S:S982A,S:D1118H                                                                                                  | 6   | 0   |
| hCoV-19/Mexico/NAY_IBT_IMSS_1851/2021          | EPI_ISL_2801724 | OL461435 | B.1.1.7 | GRY | 36 | 82A,G28881A,G28882A,G28883C,C28977T                                                                                                                                                                                                                                                                                                                                                                                                        | 22                                                                                                                                                                                                                                                                                                                                                                                                                                                                                                                                                                                                                                                                                                                                  | 82A,S:D1118H                                                                                                                                                                                                                               | 6   | 0   |











|                                            |                 |          |         |     |    |                                                                                                                                                                                                                                                                                                                                                                                   |                                                                                                                                                                                                                                                                 |   |     |
|--------------------------------------------|-----------------|----------|---------|-----|----|-----------------------------------------------------------------------------------------------------------------------------------------------------------------------------------------------------------------------------------------------------------------------------------------------------------------------------------------------------------------------------------|-----------------------------------------------------------------------------------------------------------------------------------------------------------------------------------------------------------------------------------------------------------------|---|-----|
| hCoV-19/Mexico/OAX-IBT_IMSS_1980/2021      | EPI_ISL_2801837 | OL461494 | B.1.1.7 | GRY | 38 | C241T,C913T,C2453T,C3037T,C3267T,C5388A,C5986T,C6433T,C6573T,T6954C,C9611T,C14408T,C14676T,C15279T,T16176C,C21008T,C21855T,G21974C,A23063T,C23271A,A23403G,C23604A,C23709T,T24506G,G24914C,C27643T,C27972T,G28048T,A28111G,G28280C,A28281T,T28282A,A28295G,G28713A,G28881A,G28882A,G28883C,C28977T                                                                                | N:D3L:N:N80,N:G147D,N:R203K,N:G204R,N:S235F,ORF1a:1730F,ORF1a:T1001,ORF1a:A1708D,ORF1a:S2103F,ORF1a:I2230T,ORF1a:L3116F,ORF1b:P314L,ORF1b:T2514I,ORF7a:P84S,ORF8:Q27*,ORF8:R52I,ORF8:Y73C,S598F,S5D138H,S5N501Y,S5A70D,S5D614G,S5P681H,S5T716I,S5S982A,S5D1118H | 6 | 1   |
| hCoV-19/Mexico/OAX-IBT_IMSS_1981/2021      | EPI_ISL_2801838 | OL461495 | B.1.1.7 | GRY | 37 | A,A28295G,G2881A,G28882A,G28883C,C28977T<br>C241T,C913T,C2453T,C3037T,C3267T,C5388A,C5986T,T6954C,C9611T,C14408T,C14676T,C15279T,T16176C,C21008T,C21855T,G21974C,A23063T,C23271A,A23403G,C23604A,C23709T,T24506G,G24914C,C27643T,C27972T,G28048T,A28111G,G28280C,A28281T,T28282A,A28295G,G28713A,G28881A,G28882A,G28883C,C28977T                                                  | N:D3L:N:N80,N:R203K,N:G204R,N:S235F,ORF1a:1730F,ORF1a:T1001,ORF1a:A1708D,ORF1a:S2103F,ORF1a:I2230T,ORF1a:L3116F,ORF1b:P314L,ORF1b:T2514I,ORF7a:P84S,ORF8:Q27*,ORF8:R52I,ORF8:Y73C,S598F,S5D138H,S5N501Y,S5A70D,S5D614G,S5P681H,S5T716I,S5S982A,S5D1118H         | 6 | 0   |
| hCoV-19/Mexico/OAX-LANGEBIO_IMSS_1126/2021 | EPI_ISL_2671639 | OL461496 | B.1.1.7 | GRY | 38 | C241T,C913T,C2110T,C3037T,C3267T,C5388A,C5986T,T6954C,G7042T,A10195G,T10816C,C14120T,C14408T,C14676T,C15279T,T16176C,A23063T,C23271A,A23403G,C23604A,C23709T,C23854T,T24506G,G24914C,C25002T,C27513T,C27972T,G28048T,G28075T,A28095T,A28111G,G28280C,A28281T,T28282A,G28881A,G28882A,G28883C,C28977T                                                                              | N:D3L:N:R203K,N:G204R,N:S235F,ORF1a:T1001,ORF1a:A1708D,ORF1a:I2230T,ORF1a:M2259I,ORF1b:P218L,ORF1b:P314L,ORF3a:S74A,ORF8:Q27*,ORF8:R52I,ORF8:K68*,ORF8:Y73C,S5N501Y,S5A70D,S5D614G,S5P681H,S5T716I,S5S982A,S5D1118H                                             | 6 | 21  |
| hCoV-19/Mexico/PUE_IBT_IMSS_1252/2021      | EPI_ISL_2391628 | OL461497 | B.1.1.7 | GRY | 36 | 8282A,G28881A,G28882A,G28883C,C28977T<br>T201A,C241T,C913T,C2110T,C3037T,C3267T,C5388A,C5986T,T6954C,G7042T,C9994T,A10195G,C13329T,C14120T,C14408T,C14676T,C15279T,T16176C,A23063T,C23271A,A23403G,C23604A,C23709T,T24506G,G24914C,C27972T,G28048T,G28075T,A28095T,A28111G,G28280C,A28281T,T28282A,G28881A,G28882A,G28883C,C28977T                                                | N:D3L:N:R203K,N:G204R,N:S235F,ORF1a:T1001,ORF1a:A1708D,ORF1a:I2230T,ORF1a:M2259I,ORF1b:P218L,ORF1b:P314L,ORF3a:S74A,ORF8:Q27*,ORF8:R52I,ORF8:K68*,ORF8:Y73C,S5N501Y,S5A70D,S5D614G,S5P681H,S5T716I,S5S982A,S5D1118H                                             | 6 | 427 |
| hCoV-19/Mexico/PUE_IBT_IMSS_1254/2021      | EPI_ISL_2391580 | OL461498 | B.1.1.7 | GRY | 37 | T28282A,G28881A,G28882A,G28883C,C28977T<br>C241T,C913T,C2449T,C3037T,A3196T,C3267T,C5388A,C5944T,C5986T,C6402T,T6954C,C9166T,A10323G,C14408T,C14676T,T15096C,C15279T,T16176C,A23063T,C23271A,A23403G,C23604A,C23709T,T24506G,G24914C,C27972T,G28048T,A28095T,A28111G,G28280C,A28281T,T28282A,G28881A,G28882A,G28883C,C28977T,T29710C                                              | N:D3L:N:R203K,N:G204R,N:S235F,ORF1a:E977D,ORF1a:T1001,ORF1a:A1708D,ORF1a:P2046L,ORF1a:I2230T,ORF1a:S353R,ORF1b:P314L,ORF8:Q27*,ORF8:R52I,ORF8:K68*,ORF8:Y73C,S5N501Y,S5A70D,S5D614G,S5P681H,S5T716I,S5S982A,S5D1118H                                            | 6 | 0   |
| hCoV-19/Mexico/PUE_IBT_IMSS_1522/2021      | EPI_ISL_2681162 | OL461499 | B.1.1.7 | GRY | 38 | T201A,C241T,C913T,C2110T,C3037T,C3267T,C5388A,C5986T,T6954C,G7042T,A10195G,C14120T,C14408T,C14676T,C15279T,T16176C,A23063T,C23271A,A23403G,C23604A,C23709T,T24506G,G24914C,T25612G,C27972T,G28048T,G28075T,A28095T,A28111G,G28280C,A28281T,T28282A,G28881A,G28882A,G28883C,G28904T,C28977T                                                                                        | N:D3L:N:R203K,N:G204R,N:A211S,N:S235F,ORF1a:T1001,ORF1a:A1708D,ORF1a:I2230T,ORF1a:M2259I,ORF1b:P218L,ORF1b:P314L,ORF3a:S74A,ORF8:Q27*,ORF8:R52I,ORF8:K68*,ORF8:Y73C,S5N501Y,S5A70D,S5D614G,S5P681H,S5T716I,S5S982A,S5D1118H                                     | 6 | 0   |
| hCoV-19/Mexico/PUE_IBT_IMSS_1523/2021      | EPI_ISL_2681191 | OL461500 | B.1.1.7 | GRY | 41 | C241T,T754C,C913T,C3037T,C3267T,C5388A,C5986T,T6954C,C7299T,A13768T,C14408T,C14676T,T15096C,C15279T,T16176C,A19862T,A23063T,C23271A,A23403G,C23604A,C23709T,T24506G,G24914C,C26606T,G27281T,C27972T,G28048T,A28111G,C28153T,G28280C,A28281T,T28282A,A28877T,G28878C,G28881A,G28882A,G28883C,C28977T,A29491G                                                                       | N:D3L:N:R203K,N:G204R,N:S235F,ORF1a:T1001,ORF1a:A1708D,ORF1a:I2230T,ORF1a:A2345V,ORF1b:M101L,ORF1b:P314L,ORF1b:A2132V,ORF6:W27L,ORF8:Q27*,ORF8:R52I,ORF8:K68*,ORF8:Y73C,S5N501Y,S5A70D,S5D614G,S5P681H,S5T716I,S5S982A,S5D1118H                                 | 6 | 704 |
| hCoV-19/Mexico/PUE_IBT_IMSS_1549/2021      | EPI_ISL_2681347 | OL461501 | B.1.1.7 | GRY | 39 | 82A,A28877T,G28878C,G28881A,G28882A,G28883C,C28977T,A29491G<br>C203T,C241T,C913T,G1820A,C3037T,C3267T,C5388A,G5924A,C5986T,T6954C,G9526T,A12162G,C14408T,C14676T,C15279T,T16176C,A17615G,T19363C,A21137G,A23063T,C23248T,C23271A,A23403G,C23604A,C23709T,T24506G,G24914C,G285135T,C27972T,G28048T,A28111G,G28280C,A28281T,T28282A,G28881A,G28882A,G28883C,C28977T                 | N:D3L:N:R203K,N:G204R,N:S235F,ORF1a:G519S,ORF1a:T1001,ORF1a:A1708D,ORF1a:V1887I,ORF1a:I2230T,ORF1a:M3087I,ORF1a:Q3966F,ORF1b:P314L,ORF1b:K1383R,ORF1b:K2557R,ORF8:Q27*,ORF8:R52I,ORF8:Y73C,S5N501Y,S5A70D,S5D614G,S5P681H,S5T716I,S5S982A,S5D1118H,S5K1191N     | 6 | 0   |
| hCoV-19/Mexico/PUE_IBT_IMSS_1676/2021      | EPI_ISL_2681149 | OL461502 | B.1.1.7 | GRY | 39 | T201A,C241T,C913T,C2110T,C3037T,C3267T,C5388A,C5986T,T6954C,G7042T,A10195G,C13329T,C14120T,C14408T,C14676T,C15279T,T16176C,A23063T,C23271A,A23403G,C23604A,C23709T,T24506G,G24914C,T25612G,C27972T,G28048T,G28075T,A28095T,A28111G,G28280C,A28281T,T28282A,G28881A,G28882A,G28883C,C28977T                                                                                        | N:D3L:N:R203K,N:G204R,N:S235F,ORF1a:T1001,ORF1a:A1708D,ORF1a:I2230T,ORF1a:M2259I,ORF1a:T4355I,ORF1b:P218L,ORF1b:P314L,ORF3a:S74A,ORF8:Q27*,ORF8:R52I,ORF8:K68*,ORF8:Y73C,S5N501Y,S5A70D,S5D614G,S5P681H,S5T716I,S5S982A,S5D1118H                                | 6 | 0   |
| hCoV-19/Mexico/PUE_INER_IMSS_1277/2021     | EPI_ISL_2490350 | OL461503 | B.1.1.7 | GRY | 37 | 1T,T28282A,G28881A,G28882A,G28883C,C28977T<br>T201A,C241T,C913T,C2110T,C3037T,C3041T,C3267T,C5388A,C5986T,T6954C,G7042T,C9994T,A10195G,C13329T,C14120T,C14408T,C14676T,C15279T,T16176C,A23063T,C23271A,A23403G,C23604A,C23709T,T24506G,G24914C,T25612G,C27972T,G28048T,G28075T,A28095T,A28111G,G28280C,A28281T,T28282A,G28881A,G28882A,G28883C,C28977T                            | N:D3L:N:R203K,N:G204R,N:S235F,ORF1a:P926S,ORF1a:T1001,ORF1a:A1708D,ORF1a:I2230T,ORF1a:M2259I,ORF1a:T4355I,ORF1b:P218L,ORF1b:P314L,ORF3a:S74A,ORF8:Q27*,ORF8:R52I,ORF8:K68*,ORF8:Y73C,S5N501Y,S5A70D,S5D614G,S5P681H,S5T716I,S5S982A,S5D1118H                    | 6 | 0   |
| hCoV-19/Mexico/PUE_INER_IMSS_1306/2021     | EPI_ISL_2490351 | OL461504 | B.1.1.7 | GRY | 39 | G28280C,A28281T,T28282A,G28881A,G28882A,G28883C,C28977T<br>C241T,C913T,C3037T,C3267T,C5388A,C5986T,T6954C,C7299T,A13768T,C14408T,C14676T,T15096C,C15279T,T16176C,C19862T,A23063T,C23271A,A23403G,C23604A,C23709T,T24506G,G24914C,C26606T,G27281T,C27972T,G28048T,A28095T,A28111G,G28280C,A28281T,T28282A,G28881A,G28882A,G28883C,C28977T                                          | N:D3L:N:R203K,N:G204R,N:S235F,ORF1a:T1001,ORF1a:A1708D,ORF1a:I2230T,ORF1a:T3202M,ORF1a:L3776F,ORF1b:P314L,ORF1b:V1649F,ORF8:Q27*,ORF8:R52I,ORF8:K68*,ORF8:Y73C,S5N501Y,S5A70D,S5D614G,S5P681H,S5T716I,S5S982A,S5D1118H                                          | 6 | 0   |
| hCoV-19/Mexico/PUE_INER_IMSS_1322/2021     | EPI_ISL_2490352 | OL461505 | B.1.1.7 | GRY | 38 | 877T,G28878C,G28881A,G28882A,G28883C,C28977T,A29491G<br>C241T,C913T,C3037T,C3267T,C5388A,C5944T,C5986T,T6954C,C9870T,C9967T,C11591T,C13585T,C14408T,C14676T,T15096C,C15279T,T16176C,G18412T,C19983T,C22987T,A23063T,C23271A,A23403G,C23604A,C23709T,T24506G,G24914C,C27972T,G28048T,A28095T,A28111G,G28280C,A28281T,T28282A,G28881A,G28882A,G28883C,C28977T                       | N:D3L:N:R203K,N:G204P,N:S235F,ORF1a:T1001,ORF1a:A1708D,ORF1a:I2230T,ORF1a:T3202M,ORF1a:L3776F,ORF1b:P314L,ORF1b:V1649F,ORF8:Q27*,ORF8:R52I,ORF8:K68*,ORF8:Y73C,S5N501Y,S5A70D,S5D614G,S5P681H,S5T716I,S5S982A,S5D1118H                                          | 6 | 0   |
| hCoV-19/Mexico/PUE_INER_IMSS_1323/2021     | EPI_ISL_2490353 | OL461506 | B.1.1.7 | GRY | 39 | 0C,A28281T,T28282A,G28881A,G28882A,G28883C,C28977T<br>C241T,C913T,C3037T,C3267T,C5388A,C5944T,C5986T,T6954C,C14408T,C14676T,T15096C,C15279T,T16176C,C17676T,C18183T,C19524T,A21141G,A21519C,G2221V,A23063T,C23271A,A23403G,C23604A,C23709T,T24506G,G24914C,C27972T,G28048T,A28095T,A28111G,G28280C,A28281T,T28282A,G28881A,G28882A,G28883C,C28977T                                | N:D3L:N:R203K,N:G204P,N:S235F,ORF1a:T1001,ORF1a:A1708D,ORF1a:A2128T,ORF1a:I2230T,ORF1b:P314L,ORF1b:R684S,ORF3a:H78Y,ORF8:Q27*,ORF8:R52I,ORF8:K68*,ORF8:Y73C,S5N501Y,S5A70D,S5D614G,S5P681H,S5T716I,S5S982A,S5D1118H                                             | 6 | 0   |
| hCoV-19/Mexico/PUE_LANGEBIO_IMSS_0438/2021 | EPI_ISL_1662170 | OL461507 | B.1.1.7 | GRY | 41 | 095T,A28111G,G28280C,A28281T,T28282A,G28881A,G28882A,G28883C,G28884C,C28977T<br>C241T,C913T,C2110T,G2782T,C3037T,C3267T,C4456T,C5388A,C5986T,T6954C,T9931C,C14120T,C14408T,C14676T,C15279T,T16176C,C16733T,C19390T,T2202C,A23063T,C23271A,A23403G,C23604A,C23709T,T24506G,C24904T,G24914C,C27972T,G28048T,A28095T,A28111G,G28280C,A28281T,T28282A,G28881A,G28882A,G28883C,C28977T | N:D3L:N:R203K,N:G204R,N:S235F,ORF1a:T1001,ORF1a:A1708D,ORF1a:I2230T,ORF1b:P218L,ORF1b:P314L,ORF1b:S1089L,ORF1b:P1975S,ORF8:Q27*,ORF8:R52I,ORF8:K68*,ORF8:Y73C,S5M153T,S5N501Y,S5A70D,S5D614G,S5P681H,S5T716I,S5S982A,S5D1118H                                   | 6 | 0   |
| hCoV-19/Mexico/PUE_LANGEBIO_IMSS_0610/2021 | EPI_ISL_2402028 | OL461508 | B.1.1.7 | GRY | 38 | 0C,A28281T,T28282A,G28881A,G28882A,G28883C,C28977T<br>T201A,C241T,C913T,C2110T,C3037T,C3267T,C3777T,C5388A,C5986T,T6954C,G7042T,C9532T,A10195G,C13329T,C14120T,C14408T,C14676T,C15279T,T16176C,A23063T,C23271A,A23403G,C23604A,C23709T,T24506G,G24914C,T25612G,C27972T,G28048T,G28075T,A28095T,A28111G,G28280C,A28281T,T28282A,G28881A,G28882A,G28883C,C28977T                    | N:D3L:N:R203K,N:G204R,N:S235F,ORF1a:T1001,ORF1a:A1708D,ORF1a:I2230T,ORF1a:M2259I,ORF1a:T4355I,ORF1b:P218L,ORF1b:P314L,ORF3a:S74A,ORF8:Q27*,ORF8:R52I,ORF8:K68*,ORF8:Y73C,S5N501Y,S5A70D,S5D614G,S5P681H,S5T716I,S5S982A,S5D1118H                                | 6 | 177 |
| hCoV-19/Mexico/PUE-IBT_IMSS_1889/2021      | EPI_ISL_2801758 | OL461509 | B.1.1.7 | GRY | 39 | G28280C,A28281T,T28282A,G28881A,G28882A,G28883C,C28977T<br>G149T,C241T,C913T,C3037T,C3267T,G5023A,C5388A,C5986T,T6954C,G10396T,C12513T,C14408T,C14676T,C15279T,T16176C,A17615G,G20962A,C21108T,A23063T,C23271A,A23403G,C23604A,C23709T,T24506G,G24914C,G26730C,C27972T,G28048T,A28111G,G28280C,A28281T,T28282A,C28603T,G28881A,G28882A,G28883C,C28977T,G29440T                    | N:D3L:N:R203K,N:G204R,N:S235F,ORF1a:T1001,ORF1a:A1708D,ORF1a:I2230T,ORF1a:M2259I,ORF1b:P218L,ORF1b:P314L,ORF3a:S74A,ORF8:Q27*,ORF8:R52I,ORF8:K68*,ORF8:Y73C,S5N501Y,S5A70D,S5D614G,S5P681H,S5T716I,S5S982A,S5D1118H                                             | 6 | 171 |
| hCoV-19/Mexico/PUE-IBT_IMSS_1911/2021      | EPI_ISL_2801776 | OL461510 | Q.3     | GRY | 38 | 282A,C28603T,G28881A,G28882A,G28883C,C28977T,G29440T<br>T201A,C241T,C913T,C3037T,C3267T,C5388A,C5986T,T6954C,G7042T,A10195G,C14120T,C14408T,C14676T,C15279T,T16176C,C19536T,A23063T,C23271A,A23403G,C23604A,C23709T,T24506G,G24914C,T25612G,C27972T,G28048T,A28095T,A28111G,G28280C,A28281T,T28282A,G28881A,G28882A,G28883C,C28977T                                               | N:D3L:N:R203K,N:G204R,N:S235F,ORF1a:T1001,ORF1a:A1708D,ORF1a:I2230T,ORF1a:M2259I,ORF1b:P218L,ORF1b:P314L,ORF3a:S74A,ORF8:Q27*,ORF8:R52I,ORF8:K68*,ORF8:Y73C,S5N501Y,S5A70D,S5D614G,S5P681H,S5T716I,S5S982A,S5D1118H                                             | 6 | 190 |
| hCoV-19/Mexico/PUE-IBT_IMSS_1913/2021      | EPI_ISL_2801778 | OL461511 | B.1.1.7 | GRY | 36 | T201A,C241T,C913T,C2110T,C3037T,C3267T,C5388A,C5986T,T6954C,G7042T,A10195G,C14120T,C14408T,C14676T,C15279T,T16176C,C19536T,A22194C,A23063T,C23271A,A23403G,C23604A,C23709T,T24506G,G24914C,T25612G,C27972T,G28048T,G28075T,A28095T,A28111G,G28280C,A28281T,T28282A,G28881A,G28882A,G28883C,C28977T                                                                                | N:D3L:N:R203K,N:G204R,N:S235F,ORF1a:T1001,ORF1a:A1708D,ORF1a:I2230T,ORF1a:M2259I,ORF1b:P218L,ORF1b:P314L,ORF3a:S74A,ORF8:Q27*,ORF8:R52I,ORF8:K68*,ORF8:Y73C,S5N501Y,S5A70D,S5D614G,S5P681H,S5T716I,S5S982A,S5D1118H                                             | 6 | 10  |
| hCoV-19/Mexico/PUE-IBT_IMSS_1944/2021      | EPI_ISL_2801806 | OL461512 | B.1.1.7 | GRY | 38 | 0C,A28281T,T28282A,G28881A,G28882A,G28883C,C28977T<br>T201A,C241T,C913T,C2110T,C3037T,C3267T,C5388A,C5986T,T6954C,G7042T,A10195G,C14120T,C14408T,C14676T,C15279T,T16176C,C19536T,A22194C,A23063T,C23271A,A23403G,C23604A,C23709T,T24506G,G24914C,T25612G,C27972T,G28048T,G28075T,A28095T,A28111G,G28280C,A28281T,T28282A,G28881A,G28882A,G28883C,C28977T                          | N:D3L:N:R203K,N:G204R,N:S235F,ORF1a:T1001,ORF1a:A1708D,ORF1a:I2230T,ORF1a:M2259I,ORF1b:P218L,ORF1b:P314L,ORF3a:S74A,ORF8:Q27*,ORF8:R52I,ORF8:K68*,ORF8:Y73C,S5N501Y,S5A70D,S5D614G,S5P681H,S5T716I,S5S982A,S5D1118H                                             | 6 | 10  |

|                                            |                 |          |         |     |    |                                                                                                                                                                                                                                                                                                        |                                                                                                                                                                                                                                    |     |
|--------------------------------------------|-----------------|----------|---------|-----|----|--------------------------------------------------------------------------------------------------------------------------------------------------------------------------------------------------------------------------------------------------------------------------------------------------------|------------------------------------------------------------------------------------------------------------------------------------------------------------------------------------------------------------------------------------|-----|
| hCoV-19/Mexico/PUE-IBT_IMSS_2022/2021      | EPI_ISL_2801869 | OL461513 | B.1.1.7 | GRY | 41 | T201A,C241T,C913T,C2110T,C3037T,C3267T,T3905C,C5388A,C5986T,T6954C,G7042T,A10195G,C13329T,C14120T,C14408T,C14676T,C15279T,T16176C,G18412T,C21575T,A23063T,C23271A,A23403G,C23604A,C23709T,T24506G,G24914C,G25612G,C27972T,G28048T,G28075                                                               | N:D3L:N:R203K,N:G204R,N:S235F,ORF1a:T1001,ORF1a:F1214L,ORF1a:A1708 D,ORF1a:I2230T,ORF1a:M2259I,ORF1a:T4355I,ORF1b:P218L,ORF1b:P314L,O                                                                                              | 5   |
| hCoV-19/Mexico/PUE-LANGEBIO_IMSS_1091/2021 | EPI_ISL_2671642 | OL461514 | B.1.1.7 | GRY | 38 | C241T,C913T,C3037T,C3267T,C5388A,C5986T,T6954C,A10323G,C11704T,A12162G,C14408T,C14676T,C15279T,C15720T,T16176C,T17009C,A17187G,A17615G,G21063A,A21137G,G23063T,C23271A,A23403G,C23604A,C23709T,T24506G,G24914C,G25612G,C27972T,G28048T,A28111G,G28280C,A28281T,T28282A,G28881A,G28882A,G28883C,G28977T | N:D3L:N:R203K,N:G204R,N:S235F,ORF1a:T1001,ORF1a:F1214L,ORF1a:A1708 D,ORF1a:I2230T,ORF1a:M2259I,ORF1b:P218L,ORF1b:P314L,ORF1b:F314A,ORF8:K68I,C61F,28                                                                               | 5   |
| hCoV-19/Mexico/PUE-LANGEBIO_IMSS_1093/2021 | EPI_ISL_2671644 | OL461515 | B.1.1.7 | GRY | 38 | T201A,C241T,C913T,C1545T,C2110T,C3037T,C3267T,C5388A,C5986T,T6954C,G7042T,A10195G,C14120T,C14408T,C14676T,C15279T,T16176C,C22444T,A23063T,C23271A,A23403G,C23604A,C23709T,T24506G,G24914C,G25612G,C27972T,G28048T,G28075T,A28095T,A28111G,G28280C,A28281T,T28282A,G28881A,G28882A,G28883C,G28977T      | N:D3L:N:R203K,N:G204R,N:S235F,ORF1a:A427V,ORF1a:T1001,ORF1a:A1708 D,ORF1a:I2230T,ORF1a:M2259I,ORF1b:P218L,ORF1b:P314L,ORF1b:F314A,ORF8:K68I,C61F,28                                                                                | 2   |
| hCoV-19/Mexico/PUE-LANGEBIO_IMSS_1153/2021 | EPI_ISL_2671652 | OL461516 | B.1.1.7 | GRY | 38 | C913T,C241T,C2449T,C3037T,A3196T,C3267T,C5388A,C5944T,C5986T,C6402T,T6954C,C9166T,A10323G,C14408T,C14676T,T15096C,C15279T,T16176C,A23063T,C23271A,A23403G,C23604A,C23709T,T24506G,G24914C,C27972T,G28048T,A28095T,A28111G,G28280C,A28281T,T28282A                                                      | N:D3L:N:R203K,N:G204P,N:S235F,ORF1a:E977D,ORF1a:T1001,ORF1a:A1708 D,ORF1a:P2046L,ORF1a:I2230T,ORF1a:K3353R,ORF1b:P314L,ORF8:Q27*,ORF8:R52I,ORF8:K68I,ORF8:Y73C,S:N501Y,S:A570D,S:D614G,S:P681H,S:T716I,S5982A,S:D1118H             | 1   |
| hCoV-19/Mexico/PUE-LANGEBIO_IMSS_1387/2021 | EPI_ISL_2942515 | OL461517 | B.1.1.7 | GRY | 37 | 282A,A28295G,G28881A,G28882A,G28883C,G28977T                                                                                                                                                                                                                                                           | N:D3L:N:R203K,N:G204R,N:S235F,ORF1a:K684N,ORF1a:I730F,ORF1a:T1001,ORF1a:A1708D,ORF1a:I2230T,ORF1a:I3116F,ORF1a:I3829F,ORF1b:P314L,ORF1b:T2514I,ORF7a:P845,ORF8:Q27*,ORF8:R52I,ORF8:Y73C,S598F,S:D1118H                             | 459 |
| hCoV-19/Mexico/PUE-LANGEBIO_IMSS_1853/2021 | EPI_ISL_2942920 | OL461518 | B.1.1.7 | GRY | 41 | C913T,C2449T,C3037T,C3267T,C5388A,C5944T,C5986T,C6402T,G6669T,T6954C,C9166T,A10323G,A12594G,C14408T,C14676T,T15096C,C15279T,T16176C,A23063T,C23271A,A23403G,C23604A,C23709T,T24506G,G24914C,C27972T,G28048T,A28095T,A28111G,G28280C,A28281T,T28282A,G28881A,G28882A,G28883C,G28977T,T29710C            | N:D3L:N:R203K,N:G204P,N:S235F,ORF1a:T1001,ORF1a:A1708D,ORF1a:P2046L,ORF1a:W2135L,ORF1a:I2230T,ORF1a:K3353R,ORF1a:Q110I,ORF1b:P314L,ORF8:Q27*,ORF8:R52I,ORF8:K68I,ORF8:Y73C,S:N501Y,S:A570D,S:D614G,S:P681H,S:T716I,S5982A,S:D1118H | 553 |
| hCoV-19/Mexico/QUE_LANGEBIO_IMSS_0516/2021 | EPI_ISL_2401943 | OL461519 | B.1.1.7 | GRY | 37 | 81T,T28282A,G28881A,G28882A,G28883C,G28977T                                                                                                                                                                                                                                                            | N:D3L:N:R203K,N:G204P,N:S235F,ORF1a:T1001,ORF1a:A1708D,ORF1a:I2230T,ORF1b:P314L,ORF1b:I1293V,ORF1b:V1649F,ORF8:Q27*,ORF8:R52I,ORF8:K68I,ORF8:Y73C,S:N501Y,S:A570D,S:D614G,S:P681H,S:T716I,S5982A,S:D1118H                          | 5   |
| hCoV-19/Mexico/QUE_LANGEBIO_IMSS_0810/2021 | EPI_ISL_2402220 | OL461520 | B.1.1.7 | GRY | 38 | 81T,T28282A,G28881A,G28882A,G28883C,G28884C,C28977T                                                                                                                                                                                                                                                    | N:D3L:N:R203K,N:G204P,N:S235F,ORF1a:T1001,ORF1a:A1708D,ORF1a:I2230T,ORF1b:P314L,ORF1b:I1293V,ORF1b:V1649F,ORF8:Q27*,ORF8:R52I,ORF8:K68I,ORF8:Y73C,S:N501Y,S:A570D,S:D614G,S:P681H,S:T716I,S5982A,S:D1118H                          | 23  |
| hCoV-19/Mexico/QUE_LANGEBIO_IMSS_0811/2021 | EPI_ISL_2402221 | OL461521 | B.1.1.7 | GRY | 37 | 282A,G28881A,G28882A,G28883C,G28884C,C28977T                                                                                                                                                                                                                                                           | N:D3L:N:R203K,N:G204P,N:S235F,ORF1a:T1001,ORF1a:A1708D,ORF1a:I2230T,ORF1b:P314L,ORF1b:I1293V,ORF1b:V1649F,ORF8:Q27*,ORF8:R52I,ORF8:K68I,ORF8:Y73C,S:N501Y,S:A570D,S:D614G,S:P681H,S:T716I,S5982A,S:D1118H                          | 331 |
| hCoV-19/Mexico/QUE-IBT_IMSS_1993/2021      | EPI_ISL_2801848 | OL461522 | B.1.1.7 | GRY | 41 | T,A28111G,G28280C,A28281T,T28282A,G28881A,G28882A,G28883C,G28977T                                                                                                                                                                                                                                      | M:A1715I,N:D3L:N:R203K,N:G204P,N:S235F,ORF1a:T1001,ORF1a:A1708D,ORF1a:I2230T,ORF1b:P314L,ORF1b:V1649F,ORF8:Q27*,ORF8:R52I,ORF8:K68I,ORF8:Y73C,S:N501Y,S:A570D,S:D614G,S:P681H,S:T716I,S5982A,S:D1118H                              | 1   |
| hCoV-19/Mexico/QUE-IBT_IMSS_1994/2021      | EPI_ISL_2801849 | OL461523 | B.1.1.7 | GRY | 40 | G,G28280C,A28281T,T28282A,G28881A,G28882A,G28883C,G28884C,C28977T                                                                                                                                                                                                                                      | N:D3L:N:R203K,N:G204P,N:S235F,ORF1a:T1001,ORF1a:A1708D,ORF1a:I2230T,ORF1b:P314L,ORF1b:V1649F,ORF8:Q27*,ORF8:R52I,ORF8:K68I,ORF8:Y73C,S:N501Y,S:A570D,S:D614G,S:P681H,S:T716I,S5982A,S:D1118H                                       | 9   |
| hCoV-19/Mexico/ROO_IBT_IMSS_1716/2021      | EPI_ISL_2681136 | OL461524 | B.1.1.7 | GRY | 34 | 882A,G28883C,C28977T                                                                                                                                                                                                                                                                                   | N:D3L:N:R203K,N:G204R,N:S235F,ORF1a:I730F,ORF1a:T1001,ORF1a:A1708D,ORF1a:I2230T,ORF1a:I3116F,ORF1a:I3210F,ORF1b:P314L,ORF8:Q27*,ORF8:R52I,ORF8:Y73C,S598F,S:D138H,S:D1118H                                                         | 0   |
| hCoV-19/Mexico/ROO_IBT_IMSS_1729/2021      | EPI_ISL_2681233 | OL461525 | B.1.1.7 | GRY | 37 | 281T,T28282A,G28881A,G28882A,G28883C,C28977T                                                                                                                                                                                                                                                           | N:D3L:N:R203K,N:G204R,N:S235F,ORF1a:K141Q,ORF1a:T1001,ORF1a:A1708 D,ORF1a:I2230T,ORF1b:P218L,ORF1b:P314L,ORF8:Q27*,ORF8:P36L,ORF8:R52I,ORF8:C61F,ORF8:K68I,ORF8:Y73C,S:N501Y,S:A570D,S:D614G,S:P681H,S:T716I,S5982A,S:D1118H       | 197 |
| hCoV-19/Mexico/ROO_IBT_IMSS_1732/2021      | EPI_ISL_2681050 | OL461526 | B.1.1.7 | GRY | 42 | 2T,G28048T,A28111G,G28280C,A28281T,T28282A,A28804G,G28881A,G28882A,G28883C,C28                                                                                                                                                                                                                         | N501Y,S:A570D,S:D614G,S:P681H,S:T716I,S5982A,S:D1118H                                                                                                                                                                              | 0   |
| hCoV-19/Mexico/ROO_IBT_IMSS_1733/2021      | EPI_ISL_2681133 | OL461527 | B.1.1   | GR  | 38 | 8603T,G28881A,G28882A,G28883C,C28977T,T29834A,T29858A                                                                                                                                                                                                                                                  | N:D3L:N:R203K,N:G204R,N:S235F,ORF1a:T1001,ORF1a:A1708D,ORF1a:I2230T,ORF1a:I3210F,ORF1b:P314L,ORF1b:I555I,ORF1b:F314A,ORF8:Q27*,ORF8:R52I,ORF8:Y73C,S598F,S:D138H,S:D1118H                                                          | 0   |
| hCoV-19/Mexico/ROO_IBT_IMSS_1745/2021      | EPI_ISL_2681176 | OL461528 | B.1.1.7 | GRY | 39 | G204T,C241T,C913T,C3037T,C3267T,C5388A,C5986T,T6954C,C9693T,C11572T,C14408T,C14676T,C15279T,T16176C,T23042C,A23063T,C23271A,A23403G,C23604A,C23709T,T24506G,G24914C,G25218T,C2553T,C27615T,C27972T,G28048T,A28095T,A28111G,G28280C,A28281T,T28282A,G28881A,G28882A,G28883C,C28977T                     | N:D3L:N:R203K,N:G204R,N:S235F,ORF1a:T1001,ORF1a:A1708D,ORF1a:I2230T,ORF1a:A3143V,ORF1b:P314L,ORF1b:F314A,ORF8:Q27*,ORF8:R52I,ORF8:K68I,ORF8:Y73C,S5949P,S:N501Y,S:A570D,S:D614G,S:P681H,S:T716I,S5982A,S:D1118H,S:G1219V           | 46  |
| hCoV-19/Mexico/ROO_INER_IMSS_00420/2021    | EPI_ISL_1585428 | OL461529 | B.1.1.7 | GRY | 36 | 2A,G28881A,G28882A,G28883C,C28977T                                                                                                                                                                                                                                                                     | N:D3L:N:R203K,N:G204R,N:S235F,ORF1a:T1001,ORF1a:A1708D,ORF1a:I2230T,ORF1a:M2259I,ORF1b:P218L,ORF1b:P314L,ORF8:Q27*,ORF8:R52I,ORF8:C61F,ORF8:K68I,ORF8:Y73C,S:N501Y,S:A570D,S:D614G,S:P681H,S:T716I,S5982A,S:D1118H                 | 0   |
| hCoV-19/Mexico/ROO_INER_IMSS_00436/2021    | EPI_ISL_1585444 | OL461530 | B.1.1.7 | GRY | 37 | 281T,T28282A,G28881A,G28882A,G28883C,C28977T                                                                                                                                                                                                                                                           | N:D3L:N:R203K,N:G204R,N:S235F,ORF1a:I730F,ORF1a:T1001,ORF1a:A1708D,ORF1a:I2230T,ORF1a:M2259I,ORF1b:P218L,ORF1b:P314L,ORF8:Q27*,ORF8:R52I,ORF8:C61F,ORF8:K68I,ORF8:Y73C,S:N501Y,S:A570D,S:D614G,S:P681H,S:T716I,S5982A,S:D1118H     | 0   |
| hCoV-19/Mexico/ROO_INER_IMSS_00771/2021    | EPI_ISL_2091225 | OL461531 | B.1.1.7 | GRY | 33 | 914C,C27972T,G28048T,A28111G,G28280C,A28281T,T28282A,A28295G,G28881A,G28882A,G                                                                                                                                                                                                                         | N:D3L:N:R203K,N:G204R,N:S235F,ORF1a:T1001,ORF1a:A1708D,ORF1a:I2230T,ORF1a:M2259I,ORF1b:P218L,ORF1b:P314L,ORF8:Q27*,ORF8:R52I,ORF8:C61F,ORF8:K68I,ORF8:Y73C,S:N501Y,S:A570D,S:D614G,S:P681H,S:T716I,S5982A,S:D1118H                 | 0   |



|                                                |                 |          |         |     |                                                                                                                                                                                                                                                                                                                                                                                                                                                                                                                                                  |                                                                                                                                                                                                                                                                                                       |   |      |
|------------------------------------------------|-----------------|----------|---------|-----|--------------------------------------------------------------------------------------------------------------------------------------------------------------------------------------------------------------------------------------------------------------------------------------------------------------------------------------------------------------------------------------------------------------------------------------------------------------------------------------------------------------------------------------------------|-------------------------------------------------------------------------------------------------------------------------------------------------------------------------------------------------------------------------------------------------------------------------------------------------------|---|------|
| hCoV-19/Mexico/ROO_INER_IMSS_00790/2021        | EPI_ISL_2091243 | OL461532 | B.1.1.7 | GRY | C241T,C913T,C2453T,C3037T,C3267T,C5388A,C5986T,T6954C,C9611T,C14408T,C14676T,C15279T,T16176C,C21855T,G21974C,A23063T,C23271A,A23403G,C23604A,C23709T,T24506G,G24914C,C23709T,G28048T,A28111G,G28280C,A28281T,T28282A,G28881A,G28882A,G28883C,C241T,C913T,C2110T,G3004T,C3037T,C3267T,C5388A,C5986T,T6954C,G7042T,C10789T,C14120T,C14408T,C14676T,C15279T,T16176C,G17019T,A23063T,C23271A,A23403G,C23604A,C23709T,T24506G,G24914C,C26110T,C26735T,C27972T,G28048T,A28095T,A28111G,G28280C,A28281T,T28282A,A28804C,G28881A,G28882A,G28883C,C28977T | N:D3L:N:N80,N:R203K,N:G204R,N:S235F,ORF1a:1730F,ORF1a:T1001,ORF1a:A1708D,ORF1a:I2230T,ORF1a:L3116F,ORF1b:P314L,ORF8_Q27*,ORF8_R52I,O                                                                                                                                                                  | 6 | 0    |
| hCoV-19/Mexico/ROO_INER_IMSS_00791/2021        | EPI_ISL_2091244 | OL461533 | B.1.1.7 | GRY | C222T,C241T,C913T,C2110T,C3037T,C3267T,C5388A,C5986T,T6954C,G7042T,C14120T,C14408T,C14676T,C15279T,T16176C,C17762T,A23063T,C23271A,A23403G,C23604A,C23709T,T24506G,G24914C,T25180C,C27972T,G28048T,A28095T,A28111G,G28280C,A28281T,T28282A,G28881A,G28882A,G28883C,C28977T                                                                                                                                                                                                                                                                       | R8:Y73C,S598F,S:D138H,S:N501Y,S:A570D,S:D614G,S:P681H,S:T716I,S5982A,N:D3L:N:R203K,N:G204R,N:S235F,ORF1a:1730F,ORF1a:T1001,ORF1a:A1708D,ORF1a:I2230T,ORF1a:M2259,ORF1b:P218L,ORF1b:P314L,ORF1b:A1432V,ORF8_Q27*,ORF8_R52I,ORF8_K68*,ORF8_Y73C,S:N501Y,S:A570D,S:D614G,S:P681H,S:T716I,S5982A,S:D1118H | 6 | 0    |
| hCoV-19/Mexico/ROO_INER_IMSS_00792/2021        | EPI_ISL_2091245 | OL461534 | B.1.1.7 | GRY | C241T,C466T,C913T,A2270G,C3037T,C3267T,C5388A,C5884T,C5986T,T6954C,C14408T,G14635A,C14676T,C15279T,T16176C,A21027G,C21219T,G22361T,A23063T,C23271A,A23403G,C23604A,C23709T,T24506G,G24914C,G25996A,G26305T,C27879T,C27972T,G28048T,A28111G,G28280C,A28281T,T28282A,G28881A,G28882A,G28883C,C28977T                                                                                                                                                                                                                                               | N:D3L:N:N80,N:R203K,N:G204R,N:S235F,ORF1a:1730F,ORF1a:T1001,ORF1a:A1708D,ORF1a:I2230T,ORF1a:M2259,ORF1b:P218L,ORF1b:P314L,ORF1b:A1432V,ORF8_Q27*,ORF8_R52I,ORF8_K68*,ORF8_Y73C,S:N501Y,S:A570D,S:D614G,S:P681H,S:T716I,S5982A,S:D1118H                                                                | 6 | 0    |
| hCoV-19/Mexico/ROO_INER_IMSS_1130/2021         | EPI_ISL_2490311 | OL461535 | B.1.1.7 | GRY | C241T,C913T,C2453T,C3037T,C3267T,C5388A,C5986T,T6954C,C9611T,C14408T,C14676T,C15279T,T16176C,C21855T,G21974C,A23063T,C23271A,A23403G,C23604A,C23709T,T24506G,G24914C,C25886T,C27972T,G28048T,A28111G,G28280C,A28281T,T28282A,A28295G,G28881A,G28882A,G28883C,C28977T                                                                                                                                                                                                                                                                             | EL21F,N:D3L:N:R203K,N:G204R,N:S235F,ORF1a:K669E,ORF1a:T1001,ORF1a:A1708D,ORF1a:I2230T,ORF1b:P314L,ORF1b:A390T,ORF3a:V202I,ORF7b:H42Y,ORF8_Q27*,ORF8_R52I,ORF8_Y73C,S:V267L,S:N501Y,S:A570D,S:D614G,S:P681H,S:T716I,S5982A,S:D1118H                                                                    | 7 | 0    |
| hCoV-19/Mexico/ROO_INER_IMSS_1152/2021         | EPI_ISL_2490330 | OL461536 | B.1.1.7 | GRY | C222T,C241T,C913T,C2110T,C3037T,C3267T,C5388A,C5986T,T6954C,G7042T,C14120T,C14408T,C14676T,C15279T,T16176C,C17762T,A23063T,C23271A,A23403G,C23604A,C23709T,T24506G,G24914C,T25180C,C27972T,G28048T,A28095T,A28111G,G28280C,A28281T,T28282A,G28881A,G28882A,G28883C,C28977T                                                                                                                                                                                                                                                                       | N:D3L:N:R203K,N:G204R,N:S235F,ORF1a:T1001,ORF1a:A1708D,ORF1a:I2230T,ORF1a:M2259,ORF1b:P218L,ORF1b:P314L,ORF1b:A1432V,ORF1b:A1662V,ORF8_Q27*,ORF8_R52I,ORF8_K68*,ORF8_Y73C,S:N501Y,S:A570D,S:D614G,S:P681H,S:T716I,S5982A,S:D1118H                                                                     | 6 | 1    |
| hCoV-19/Mexico/ROO_INER_IMSS_1162/2021         | EPI_ISL_2490347 | OL461537 | B.1.1.7 | GRY | C913T,C3037T,C3267T,C5388A,C5986T,T6954C,C14120T,C14408T,C14676T,C15279T,T16176C,C17762T,A23063T,C23271A,A23403G,C23604A,C23709T,T24506G,G24914C,G25996A,G26305T,C27879T,C27972T,G28048T,A28095T,A28111G,G28280C,A28281T,T28282A,G28881A,G28882A,G28883C,C28977T                                                                                                                                                                                                                                                                                 | N:D3L:N:R203K,N:G204R,N:S235F,ORF1a:T1001,ORF1a:A1708D,ORF1a:I2230T,ORF1b:P218L,ORF1b:P314L,ORF1b:A1432V,ORF1b:A1662V,ORF8_Q27*,ORF8_R52I,ORF8_K68*,ORF8_Y73C,S:N501Y,S:A570D,S:D614G,S:P681H,S:T716I,S5982A,S:D1118H                                                                                 | 8 | 1078 |
| hCoV-19/Mexico/ROO_LANGEBIO_IMSS_07605-NC/2021 | EPI_ISL_2970025 | OL461538 | B.1.1.7 | GRY | C241T,C913T,G2281A,C3037T,C3267T,C5388A,C5986T,T6954C,C14408T,C14676T,C15279T,T16176C,A17615G,C18747T,C20844T,A21137G,A23063T,C23271A,A23403G,C23604A,C23709T,T24506G,G24914C,G25135T,C26110T,G26282T,C27972T,G28048T,A28111G,G28280C,A28281T,T28282A,G28881A,G28882A,G28883C,C28977T                                                                                                                                                                                                                                                            | N:D3L:N:R203K,N:G204R,N:S235F,ORF1a:T1001,ORF1a:A1708D,ORF1a:I2230T,ORF1a:M2259,ORF1b:P218L,ORF1b:P314L,ORF1b:A1432V,ORF1b:A1662V,ORF8_Q27*,ORF8_R52I,ORF8_K68*,ORF8_Y73C,S:N501Y,S:A570D,S:D614G,S:P681H,S:T716I,S5982A,S:D1118H                                                                     | 6 | 0    |
| hCoV-19/Mexico/ROO_IBT_IMSS_1756/2021          | EPI_ISL_2801655 | OL461539 | B.1.1.7 | GRY | C222T,C241T,C913T,C3037T,C3267T,C4423T,C5388A,C5986T,C6681T,T6954C,G7042T,A10359G,C14120T,C14408T,C14676T,C15279T,T16176C,C17762T,A23063T,C23271A,A23403G,C23604A,G23608T,C23709T,T24506G,G24914C,T25180C,C27972T,G28048T,A28095T,A28111G,G28280C,A28281T,T28282A,G28881A,G28882A,G28883C,C28977T                                                                                                                                                                                                                                                | N:D3L:N:R203K,N:G204R,N:S235F,ORF1a:T1001,ORF1a:A1708D,ORF1a:I2230T,ORF1a:M2259,ORF1b:P218L,ORF1b:P314L,ORF1b:A1432V,ORF1b:A1662V,ORF8_Q27*,ORF8_R52I,ORF8_K68*,ORF8_Y73C,S:N501Y,S:A570D,S:D614G,S:P681H,S:T716I,S5982A,S:D1118H                                                                     | 6 | 606  |
| hCoV-19/Mexico/ROO_IBT_IMSS_1812/2021          | EPI_ISL_2801577 | OL461540 | B.1.1.7 | GRY | C222T,C241T,C913T,C3037T,C3267T,C4423T,C5388A,C5986T,C6681T,T6954C,G7042T,A10359G,C14120T,C14408T,C14676T,C15279T,T16176C,G16207T,C17762T,G18301A,A23063T,C23271A,A23403G,C23604A,G23608T,C23709T,T24506G,G24914C,T25180C,C27972T,G28048T,A28095T,A28111G,G28280C,A28281T,T28282A,G28881A,G28882A,G28883C,C28977T                                                                                                                                                                                                                                | N:D3L:N:R203K,N:G204R,N:S235F,ORF1a:T1001,ORF1a:A1708D,ORF1a:I2230T,ORF1a:M2259,ORF1b:P218L,ORF1b:P314L,ORF1b:A1432V,ORF1b:A1662V,ORF8_Q27*,ORF8_R52I,ORF8_K68*,ORF8_Y73C,S:N501Y,S:A570D,S:D614G,S:P681H,S:T716I,S5982A,S:D1118H                                                                     | 6 | 669  |
| hCoV-19/Mexico/ROO_IBT_IMSS_1825/2021          | EPI_ISL_2801579 | OL461541 | B.1.1.7 | GRY | A28111G,G28280C,A28281T,T28282A,G28881A,G28882A,G28883C,C28977T                                                                                                                                                                                                                                                                                                                                                                                                                                                                                  | N:D3L:N:R203K,N:G204R,N:S235F,ORF1a:T1001,ORF1a:A1708D,ORF1a:I2230T,ORF1a:M2259,ORF1b:P218L,ORF1b:P314L,ORF1b:A1432V,ORF1b:A1662V,ORF8_Q27*,ORF8_R52I,ORF8_K68*,ORF8_Y73C,S:N501Y,S:A570D,S:D614G,S:P681H,S:T716I,S5982A,S:D1118H                                                                     | 6 | 188  |
| hCoV-19/Mexico/ROO_IBT_IMSS_1947/2021          | EPI_ISL_2801592 | OL461542 | B.1.1.7 | GRY | C241T,C913T,C1513T,C3037T,C3267T,C3583T,C5388A,C5944T,C5986T,T6954C,G11138T,G11401T,C12469T,C14408T,C14676T,T15096C,C15279T,T16176C,C17491T,C19862T,A23063T,C23271A,A23403G,C23506T,C23604A,C23709T,T24506G,G24914C,C27972T,G28048T,A28095T,A28111G,G28280C,A28281T,T28282A,G28881A,G28882A,G28883C,C28977T,C29546A                                                                                                                                                                                                                              | N:D3L:N:R203K,N:G204R,N:S235F,ORF1a:T1001,ORF1a:A1708D,ORF1a:I2230T,ORF1a:A3625,ORF1a:M3712I,ORF1b:P314L,ORF1b:P342S,ORF1b:A2132V,ORF8_Q27*,ORF8_R52I,ORF8_K68*,ORF8_Y73C,S:N501Y,S:A570D,S:D614G,S:P681H,S:T716I,S5982A,S:D1118H                                                                     | 6 | 1188 |
| hCoV-19/Mexico/ROO_IBT_IMSS_1969/2021          | EPI_ISL_2801594 | OL461543 | Q.3     | GRY | C241T,C913T,C1150T,C3037T,C3267T,G5023A,C5388A,C5986T,C6568T,T6954C,G8183A,A9529G,G10396T,C14391T,C14408T,C14676T,C15279T,T16176C,G16336A,A17615G,G20962A,T21147C,G22094C,A23063T,C23271A,A23403G,C23604A,C23709T,T24506G,G24914C,G26730C,C27972T,G28048T,A28111G,G28280C,A28281T,T28282A,G28881A,G28882A,G28883C,C28977T                                                                                                                                                                                                                        | M:V70L,N:D3L:N:R203K,N:G204R,N:S235F,ORF1a:T1001,ORF1a:M1586I,ORF1a:A1708D,ORF1a:I2230T,ORF1a:G2640R,ORF1b:P314L,ORF1b:V957I,ORF1b:K1383R,ORF1b:D2499N,ORF8_Q27*,ORF8_R52I,ORF8_Y73C,S:D1178H,S:N501Y,S:A570D,S:D614G,S:P681H,S:T716I,S5982A,S:D1118H                                                 | 6 | 669  |
| hCoV-19/Mexico/ROO_IBT_IMSS_2068/2021          | EPI_ISL_2801619 | OL461544 | B.1.1.7 | GRY | C241T,C913T,C2110T,C2143T,C3037T,G3047T,C3267T,C3429T,C5388A,C5986T,C6730T,C7945T,A10195G,C10834T,C14120T,C14408T,C14676T,C15279T,T16176C,T20445C,A23063T,C23271A,A23403G,C23604A,C23709T,T24506G,G24914C,C27972T,G28048T,G28075T,A28095T,A28111G,G28280C,A28281T,T28282A,G28881A,G28882A,G28883C,C28977T,C296                                                                                                                                                                                                                                   | N:D3L:N:R203K,N:G204R,N:S235F,ORF1a:T1001,ORF1a:A1708D,ORF1a:I2230T,ORF1a:M2259,ORF1b:P218L,ORF1b:P314L,ORF1b:A1432V,ORF1b:A1662V,ORF8_Q27*,ORF8_R52I,ORF8_K68*,ORF8_Y73C,S:N501Y,S:A570D,S:D614G,S:P681H,S:T716I,S5982A,S:D1118H                                                                     | 6 | 64   |
| hCoV-19/Mexico/ROO_IBT_IMSS_2093/2021          | EPI_ISL_2801641 | OL461545 | B.1.1.7 | GRY | C241T,C913T,C1471T,G12144A,C2453T,C3037T,C3267T,C5388A,C5986T,T6954C,C9286T,C9611T,A12547G,C14408T,C14676T,C15279T,T16176C,G18651T,C21855T,G21974C,A23063T,C23271A,A23403G,C23604A,C23709T,T24506G,G24914C,G25996A,G26305T,C27879T,C27972T,G28048T,A28111G,G28280C,A28281T,T28282A,G28881A,G28882A,G28883C,C28977T                                                                                                                                                                                                                               | N:D3L:N:N80,N:R203K,N:G204R,N:S235F,ORF1a:1730F,ORF1a:T1001,ORF1a:I2230T,ORF1a:L3116F,ORF1b:P314L,ORF1b:E1728D,ORF8_Q27*,ORF8_R52I,ORF8_Y73C,S598F,S:D138H,S:N501Y,S:A570D,S:D614G,S:P681H,S:T716I,S5982A,S:D1118H                                                                                    | 6 | 0    |
| hCoV-19/Mexico/ROO_LANGEBIO_IMSS_0900/2021     | EPI_ISL_2671655 | OL461547 | B.1.1.7 | GRY | C241T,C913T,C2453T,C3037T,C3267T,C5388A,C5986T,T6954C,C9611T,C14408T,C14676T,C15279T,A15860G,T16176C,C19488T,G20002T,C21855T,G21974C,A23063T,C23271A,A23403G,C23604A,C23709T,T24506G,G24914C,C27972T,G28048T,A28111G,G28280C,A28281T,T28282A,G2895G,G28881A,G28882A,G28883C,C28977T                                                                                                                                                                                                                                                              | N:D3L:N:N80,N:R203K,N:G204R,N:S235F,ORF1a:1730F,ORF1a:T1001,ORF1a:A1708D,ORF1a:I2230T,ORF1a:L3116F,ORF1b:P314L,ORF1b:K798R,ORF1b:D2179V,ORF8_Q27*,ORF8_R52I,ORF8_Y73C,S598F,S:D138H,S:N501Y,S:A570D,S:D614G,S:P681H,S:T716I,S5982A,S:D1118H                                                           | 6 | 0    |
| hCoV-19/Mexico/ROO_LANGEBIO_IMSS_0907/2021     | EPI_ISL_2671660 | OL461548 | B.1.1.7 | GRY | C222T,C241T,C913T,C2110T,C3037T,C3267T,C5388A,C5986T,T6954C,G7042T,C14120T,C14408T,C14676T,C15279T,T16176C,C17762T,A23063T,C23271A,A23403G,C23604A,C23709T,T24506G,G24914C,T25180C,G25641T,C27972T,G28048T,A28095T,A28111G,G28280C,A28281T,T28282A,G28881A,G28882A,G28883C,C28977T                                                                                                                                                                                                                                                               | N:D3L:N:R203K,N:G204R,N:S235F,ORF1a:T1001,ORF1a:A1708D,ORF1a:I2230T,ORF1a:M2259,ORF1b:P218L,ORF1b:P314L,ORF1b:A1432V,ORF8_Q27*,ORF8_R52I,ORF8_K68*,ORF8_Y73C,S:N501Y,S:A570D,S:D614G,S:P681H,S:T716I,S5982A,S:D1118H                                                                                  | 6 | 0    |
| hCoV-19/Mexico/ROO_LANGEBIO_IMSS_0926/2021     | EPI_ISL_2671671 | OL461549 | B.1.1.7 | GRY | C241T,C913T,C2453T,C3037T,C3267T,A4452G,C5388A,C5986T,T6954C,C9611T,C14408T,C14676T,C15279T,T16176C,G1451A,C21855T,G21974C,A23063T,C23271A,A23403G,C23604A,C23709T,T24506G,G24914C,C25886T,C27972T,G28048T,A28111G,G28280C,A28281T,T28282A,A28295G,G28881A,G28882A,G28883C,C28977T                                                                                                                                                                                                                                                               | N:D3L:N:N80,N:R203K,N:G204R,N:S235F,ORF1a:1730F,ORF1a:T1001,ORF1a:A1708D,ORF1a:I2230T,ORF1a:L3116F,ORF1b:P314L,ORF1b:G2662S,ORF3a:S165F,ORF8_Q27*,ORF8_R52I,ORF8_Y73C,S598F,S:D138H,S:N501Y,S:A570D,S:D614G,S:P681H,S:T716I,S5982A,S:D1118H                                                           | 6 | 2    |
| hCoV-19/Mexico/ROO_LANGEBIO_IMSS_0928/2021     | EPI_ISL_2671673 | OL461550 | B.1.1.7 | GRY | C81A,G28882A,G28883C,C28977T                                                                                                                                                                                                                                                                                                                                                                                                                                                                                                                     | N:D3L:N:N80,N:R203K,N:G204R,N:S235F,ORF1a:1730F,ORF1a:T1001,ORF1a:A1708D,ORF1a:I2230T,ORF1a:L3116F,ORF1b:P314L,ORF3a:S165F,ORF8_Q27*,ORF8_R52I,ORF8_Y73C,S598F,S:D138H,S:N501Y,S:A570D,S:D614G,S:P681H,S:T716I,S5982A,S:D1118H                                                                        | 6 | 4    |





|                                         |                 |          |           |     |    |                                                                                                                                                                                                                                                                                                                                                                                                                                                                                                                                                                                                                                                    |                                                                                                                                                                                                                                                           |    |      |
|-----------------------------------------|-----------------|----------|-----------|-----|----|----------------------------------------------------------------------------------------------------------------------------------------------------------------------------------------------------------------------------------------------------------------------------------------------------------------------------------------------------------------------------------------------------------------------------------------------------------------------------------------------------------------------------------------------------------------------------------------------------------------------------------------------------|-----------------------------------------------------------------------------------------------------------------------------------------------------------------------------------------------------------------------------------------------------------|----|------|
| hCoV-19/Mexico/SIN_C1AD-MZT_HJ1755/2021 | EPI_ISL_2680936 | OL461571 | B.1.1.7   | GR  | 38 | C241T,C913T,C2453T,C3037T,C3267T,C3646T,C5388A,G5516T,C5986T,T6954C,C9611T,C14408T,C14676T,C15279T,T16176C,C18421T,C21855T,G21974C,A23063T,C23271A,A23403G,C23604A,C23709T,T24506G,G24914C,G25273T,C25811T,C27972T,G28048T,A28111G,G28280C,A28281T,T28282A,A28295G,G28881A,G28882A,G28883C,C28977T                                                                                                                                                                                                                                                                                                                                                 | N:D3L:N:N80,N:R203K,N:G204R,N:S235F,ORF1a:L730F,ORF1a:T1001,ORF1a:A1708D,ORF1a:V1751L,ORF1a:I2230T,ORF1a:L3116F,ORF1b:P314L,ORF1b:P1652S,ORF3a:L147F,ORF8:Q27*,ORF8:R52I,ORF8:Y73C,S:N501Y,S:A570D,S:D614G,S:P681H,S:T716I,S:S982A,S:D1118H,S:M1237I      | 3  | 15   |
| hCoV-19/Mexico/SIN_C1AD-MZT_HJ1757/2021 | EPI_ISL_2894554 | OL461572 | P.1.1     | GR  | 39 | C241T,C913T,C2749T,C3037T,C5175T,C5388A,A6319G,A6613G,C7279T,T7984C,C12778T,C12784T,C13860T,C13887T,C14408T,C14676T,C15279T,T16176C,G,C17259T,C19390T,T19866C,C20104T,C216147T,C21621A,C21638T,A23063T,A23403G,C23604A,C24642T,G25088T,G28048T,A28095T,A28111G,G28280C,A28281T,T28282A,G28881A,G28882A,G28883C,C28977T                                                                                                                                                                                                                                                                                                                             | N:D3L:N:R203K,N:G204R,ORF1a:T1637I,ORF1a:A1708D,ORF1b:P314L,ORF1b:E1264D,ORF1b:P1975S,ORF1b:L2213F,ORF8:R52I,ORF8:K68*,ORF8:Y73C,S:L118H,S:P265S,S:N501Y,S:D614G,S:P681H,S:T716I,S:S982A,S:D1118H,S:M1237I                                                | 4  | 0    |
| hCoV-19/Mexico/SIN_C1AD-MZT_HJ1776/2021 | EPI_ISL_2894557 | OL461573 | B.1.1.7   | GRY | 42 | C241T,C913T,G2281A,C3037T,C3267T,C5388A,C5986T,G6094T,T6954C,A12162G,C13665T,C14408T,C14676T,C15279T,T16176C,A17615G,C18747T,C20844T,A21137G,A23063T,C23271A,A23403G,C23604A,C23709T,T24506G,G24914C,G25135T,C26110T,G26828T,C27972T,G27987T,G28048T,A28111G,G28280C,A28281T,T28282A,G28881A,G28882A,G28883C,C28977T,C241T,C913T,C2453T,C3037T,C3267T,C5388A,C5986T,T6954C,C9611T,C14408T,C14676T,C15279T,T16176C,C21855T,G21974C,A22005G,A23063T,C23271A,A23403G,C23604A,C23709T,T24506G,G24914C,G25273T,C27972T,G28048T,A28111G,G28280C,A28281T,T28282A,A28295G,G28881A,G28882A,G28883C,C28977T                                                  | N:D3L:N:R203K,N:G204R,N:S235F,ORF1a:T1001,ORF1a:A1708D,ORF1a:Q1943H,ORF1a:I2230T,ORF1a:Q3966R,ORF1b:P314L,ORF1b:K1383R,ORF1b:K2557R,ORF3a:P240S,ORF8:Q27*,ORF8:V32L,ORF8:R52I,ORF8:Y73C,S:N501Y,S:A570D,S:D614G,S:P681H,S:T716I,S:S982A,S:D1118H,S:K1191N | 25 | 1    |
| hCoV-19/Mexico/SIN_C1AD-MZT_HJ1782/2021 | EPI_ISL_2894558 | OL461574 | B.1.1.7   | GRY | 35 | C241T,C913T,C2110T,C3037T,C3267T,C5175T,C5388A,C5986T,T6954C,T7984C,C14120T,C14408T,C14676T,C15279T,T16176C,C19017T,C19390T,T19866C,G21123T,A23063T,C23271A,A23403G,C23604A,C23709T,T24506G,G24914C,C27972T,G28048T,A28111G,G28280C,A28281T,T28282A,G28881A,G28882A,G28883C,C28977T                                                                                                                                                                                                                                                                                                                                                                | N:D3L:N:N80,N:R203K,N:G204R,N:S235F,ORF1a:L730F,ORF1a:T1001,ORF1a:A1708D,ORF1a:I2230T,ORF1a:L3116F,ORF1b:P314L,ORF8:Q27*,ORF8:R52I,ORF8:Y73C,S:N501Y,S:A570D,S:D614G,S:P681H,S:T716I,S:S982A,S:D1118H,S:M1237I                                            | 25 | 0    |
| hCoV-19/Mexico/SIN_C1AD-MZT_HJ1922/2021 | EPI_ISL_2927976 | OL461575 | B.1.1.7   | GR  | 36 | C241T,C913T,C3037T,C3267T,C5388A,C5986T,G6421T,T6954C,T7204C,C9298T,T11288A,C11289A,T11290G,T11296G,C14408T,C14676T,C15279T,T16176C,A17153G,G18880T,C19554T,C21762G,T21763G,A21764T,A21766C,G22094A,A23063T,C23271A,A23403G,C23604A,C23709T,C24374T,T24506G,G24914C,C27972T,G28048T,A28111G,G28280C,A28281T,T28282A,G28774T,C28241T,C913T,G2281A,C3037T,C3267T,C5388A,C5986T,T6954C,A12162G,C13665T,C14408T,G1676T,C15279T,T16176C,A17615G,C18747T,C20844T,A21137G,A23063T,C23271A,A23403G,C23604A,C23709T,T24506G,G24914C,G25135T,C26110T,G26828T,C27972T,G27987T,G28048T,A28111G,G28280C,A28281T,T28282A,G28881A,G28882A,G28883C,C28977T,C29095T | N:D3L:N:R203K,N:G204R,N:S235F,ORF1a:T1001,ORF1a:A1708D,ORF1a:I2230T,ORF1a:Q3966R,ORF1b:P314L,ORF1b:K1383R,ORF1b:K2557R,ORF3a:P240S,ORF8:Q27*,ORF8:V32L,ORF8:R52I,ORF8:Y73C,S:N501Y,S:A570D,S:D614G,S:P681H,S:T716I,S:S982A,S:D1118H,S:K1191N              | 21 | 8H   |
| hCoV-19/Mexico/SIN_C1AD-MZT_ID2531/2021 | EPI_ISL_2533918 | OL461577 | B.1.1.7   | GR  | 41 | C241T,C913T,C2110T,C3037T,C3267T,C5388A,C5986T,T6954C,T7984C,C14120T,C14408T,C14676T,C15279T,T16176C,C19390T,T19866C,G21123T,A23063T,C23271A,A23403G,C23604A,C23709T,T24506G,G24914C,C27972T,G28048T,A28111G,G28280C,A28281T,T28282A,G28881A,G28882A,G28883C,C28977T                                                                                                                                                                                                                                                                                                                                                                               | N:D3L:N:R203K,N:G204R,N:S235F,ORF1a:T1001,ORF1a:A1708D,ORF1a:I2230T,ORF1a:Q3966R,ORF1b:P314L,ORF1b:K1383R,ORF1b:K2557R,ORF3a:P240S,ORF8:Q27*,ORF8:V32L,ORF8:R52I,ORF8:Y73C,S:N501Y,S:A570D,S:D614G,S:P681H,S:T716I,S:S982A,S:D1118H,S:K1191N              | 24 | 8H,S |
| hCoV-19/Mexico/SIN_C1AD-MZT_ID2728/2021 | EPI_ISL_2927972 | OL461578 | B.1.1.7   | GRY | 35 | 81A,G28882A,G28883C,C28977T                                                                                                                                                                                                                                                                                                                                                                                                                                                                                                                                                                                                                        | N:D3L:N:R203K,N:G204R,N:S235F,ORF1a:T1001,ORF1a:I2230T,ORF1a:Q3966R,ORF1b:P314L,ORF1b:K1383R,ORF1b:K2557R,ORF3a:P240S,ORF8:Q27*,ORF8:V32L,ORF8:R52I,ORF8:Y73C,S:N501Y,S:A570D,S:D614G,S:P681H,S:T716I,S:S982A,S:D1118H,S:K1191N                           | 21 | 8H   |
| hCoV-19/Mexico/SIN_C1AD-MZT_S6810/2021  | EPI_ISL_2533914 | OL461579 | B.1.1.7   | GR  | 38 | C241T,C913T,C2110T,C3037T,C3267T,C5388A,C5986T,T6954C,T7984C,C14120T,C14408T,C14676T,C15279T,T16176C,C19390T,G21123T,A23063T,C23271A,A23403G,C23604A,C23709T,T24506G,G24914C,C26894A,C26895A,C27972T,G28048T,A28095T,A28111G,G28280C,A28281T,T28282A,G28881A,G28882A,G28883C,C28977T                                                                                                                                                                                                                                                                                                                                                               | M:H125N,N:D3L:N:R203K,N:G204R,N:S235F,ORF1a:T1001,ORF1a:A1708D,ORF1a:I2230T,ORF1b:P218L,ORF1b:P314L,ORF1b:P1975S,ORF8:Q27*,ORF8:R52I,ORF8:K68*,ORF8:Y73C,S:N501Y,S:A570D,S:D614G,S:P681H,S:T716I,S:S982A,S:D1118H                                         | 2  | 1    |
| hCoV-19/Mexico/SIN_C1AD-MZT_S6840/2021  | EPI_ISL_2533915 | OL461580 | B.1.1.7   | GR  | 36 | C241T,C913T,C2110T,C3037T,C3267T,C5388A,C5986T,T6954C,T7984C,C14120T,C14408T,C14676T,C15279T,T16176C,C19390T,G21123T,A23063T,C23271A,A23403G,C23604A,C23709T,T24506G,G24914C,C26894A,C26895A,C27972T,G28048T,A28095T,A28111G,G28280C,A28281T,T28282A,G28881A,G28882A,G28883C,C28977T                                                                                                                                                                                                                                                                                                                                                               | M:H125N,N:D3L:N:R203K,N:G204R,N:S235F,ORF1a:T1001,ORF1a:A1708D,ORF1a:I2230T,ORF1b:P218L,ORF1b:P314L,ORF1b:P1975S,ORF8:Q27*,ORF8:R52I,ORF8:K68*,ORF8:Y73C,S:N501Y,S:A570D,S:D614G,S:P681H,S:T716I,S:S982A,S:D1118H                                         | 2  | 14   |
| hCoV-19/Mexico/SIN_C1AD-MZT_S6867/2021  | EPI_ISL_2533916 | OL461581 | B.1.1.7   | GRY | 36 | C241T,C913T,C2110T,C3037T,C3267T,C5388A,C5986T,T6954C,T7984C,C14120T,C14408T,C14676T,C15279T,T16176C,C19390T,G21123T,A23063T,C23271A,A23403G,C23604A,C23709T,T24506G,G24914C,C26894A,C26895A,C27972T,G28048T,A28095T,A28111G,G28280C,A28281T,T28282A,G28881A,G28882A,G28883C,C28977T                                                                                                                                                                                                                                                                                                                                                               | M:H125N,N:D3L:N:R203K,N:G204R,N:S235F,ORF1a:T1001,ORF1a:A1708D,ORF1a:I2230T,ORF1b:P218L,ORF1b:P314L,ORF1b:P1975S,ORF8:Q27*,ORF8:R52I,ORF8:K68*,ORF8:Y73C,S:N501Y,S:A570D,S:D614G,S:P681H,S:T716I,S:S982A,S:D1118H                                         | 22 | 0    |
| hCoV-19/Mexico/SIN_C1AD-MZT_S6921/2021  | EPI_ISL_2533919 | OL461582 | B.1.1.7   | GRY | 35 | 28881A,G28882A,G28883C,C28977T                                                                                                                                                                                                                                                                                                                                                                                                                                                                                                                                                                                                                     | N:D3L:N:N80,N:R203K,N:G204R,N:S235F,ORF1a:L730F,ORF1a:T1001,ORF1a:A1708D,ORF1a:I2230T,ORF1a:L3116F,ORF1b:P314L,ORF8:Q27*,ORF8:R52I,ORF8:Y73C,S:N501Y,S:A570D,S:D614G,S:P681H,S:T716I,S:S982A,S:D1118H,S:M1237I                                            | 25 | 6    |
| hCoV-19/Mexico/SIN_C1AD-MZT_S7016/2021  | EPI_ISL_2680938 | OL461583 | B.1.1.7   | GRY | 36 | C241T,C913T,C3037T,C3267T,C5388A,A5570G,C5986T,T6954C,C9611T,C11235T,C14408T,C14676T,C15279T,T16176C,C21855T,G21974C,A23063T,C23271A,A23403G,C23604A,C23709T,T24506G,G24914C,G25273T,C27972T,G28048T,A28111G,G28280C,A28281T,T28282A,A28295G,G28881A,G28882A,G28883C,C28977T                                                                                                                                                                                                                                                                                                                                                                       | N:D3L:N:N80,N:R203K,N:G204R,N:S235F,ORF1a:L730F,ORF1a:T1001,ORF1a:A1708D,ORF1a:M1769V,ORF1a:I2230T,ORF1a:L3116F,ORF1a:A3657V,ORF1b:P314L,ORF8:Q27*,ORF8:R52I,ORF8:Y73C,S:N501Y,S:A570D,S:D614G,S:P681H,S:T716I,S:S982A,S:D1118H,S:M1237I                  | 26 | 2    |
| hCoV-19/Mexico/SIN_C1AD-MZT_S7028/2021  | EPI_ISL_2680941 | OL461584 | B.1.1.222 | GR  | 32 | 28977T                                                                                                                                                                                                                                                                                                                                                                                                                                                                                                                                                                                                                                             | N:D3L:N:R203K,N:G204R,N:S235F,ORF1a:P959S,ORF1a:A1708D,ORF1a:E2268K,ORF1a:A2344V,ORF1a:T3255I,ORF1a:D3355E,ORF1a:L3829F,ORF1a:T4175I,ORF1b:P314L,ORF8:Q27*,ORF8:R52I,ORF8:Y73C,S:N501Y,S:A570D,S:D614G,S:P681H,S:T732A                                    | 21 | 1498 |
| hCoV-19/Mexico/SIN_C1AD-MZT_S7158/2021  | EPI_ISL_2927974 | OL461585 | B.1.1.7   | GRY | 38 | C241T,C913T,G1245A,C3037T,C3267T,C5388A,C5986T,G6421T,T6954C,T7204C,C9298T,C14408T,C14676T,C15279T,T16176C,A17153G,G18880T,G22094A,A23063T,C23271A,A23403G,C23604A,C23709T,T24506G,G24914C,C24374T,T24506G,G24914C,C27972T,G28048T,A28111G,G28280C,A28281T,T28282A,G28774T,G28881A,G28882A,G28883C,C28977T                                                                                                                                                                                                                                                                                                                                         | N:D3L:N:R203K,N:G204R,N:S235F,ORF1a:T1001,ORF1a:A1708D,ORF1a:I2230T,ORF1b:P218L,ORF1b:P314L,ORF1b:P1975S,ORF8:Q27*,ORF8:R52I,ORF8:K68*,ORF8:Y73C,S:D1178H,S:N501Y,S:A570D,S:D614G,S:P681H,S:T716I,S:S982A,S:D1118H                                        | 25 | 317  |
| hCoV-19/Mexico/SIN_INER_IMSS_1180/2021  | EPI_ISL_2490331 | OL461586 | B.1.1.7   | GRY | 42 | C241T,C913T,C3037T,C3267T,C5388A,G7067A,C7296T,G8017T,C10029T,T10330G,C11750T,C12789T,C14408T,C14676T,C15279T,T16176C,C1306T,A23063T,C23271A,A23403G,C23604A,A23756G,C27972T,G28048T,A28111G,G28280C,A28281T,T28282A,G28881A,G28882A,G28883C,C28977T                                                                                                                                                                                                                                                                                                                                                                                               | N:D3L:N:R203K,N:G204R,N:S235F,ORF1a:T1001,ORF1a:A1708D,ORF1a:I2230T,ORF1b:P314L,ORF8:Q27*,ORF8:R52I,ORF8:Y73C,S:N501Y,S:A570D,S:D614G,S:P681H,S:T716I,S:S982A,S:D1118H,S:Q1201                                                                            | 22 | 1    |
| hCoV-19/Mexico/SIN-CIAD-CLN_D0174/2021  | EPI_ISL_2987687 | OL461587 | B.1.1.7   | GR  | 36 | 8282A,G28881A,G28882A,G28883C,C28977T                                                                                                                                                                                                                                                                                                                                                                                                                                                                                                                                                                                                              | N:D3L:N:R203K,N:G204R,N:S235F,ORF1a:T1001,ORF1a:A1708D,ORF1a:I2230T,ORF1b:P314L,ORF8:Q27*,ORF8:R52I,ORF8:Y73C,S:P265S,S:N501Y,S:A570D,S:D614G,S:P681H,S:T716I,S:S982A,S:D1118H                                                                            | 23 | 7    |
| hCoV-19/Mexico/SIN-CIAD-CLN_F0865/2021  | EPI_ISL_2987694 | OL461588 | B.1.1.7   | GRY | 42 | C241T,C913T,C2110T,A2522G,C3037T,C3267T,A3647G,C5388A,C5986T,T6304G,C6317T,T6954C,G7042T,A7323G,A10195G,T11233A,T11686G,C14120T,C14408T,C14676T,C15279T,T16176C,A23063T,C23271A,A23403G,C23604A,C23709T,T24506G,G24914C,C27972T,G28048T,G28075T,G28085T,A28095T,A28111G,G28280C,A28281T,T28282A,G28881A,G28882A,G28883C,C28977T                                                                                                                                                                                                                                                                                                                    | N:D3L:N:R203K,N:G204R,N:S235F,ORF1a:T1001,ORF1a:A1708D,ORF1a:I2230T,ORF1b:P218L,ORF1b:P314L,ORF8:Q27*,ORF8:R52I,ORF8:Y73C,S:N501Y,S:A570D,S:D614G,S:P681H,S:T716I,S:S982A,S:D1118H,S:Q1201                                                                | 27 | 0    |
| hCoV-19/Mexico/SIN-CIAD-MZT_HJ1803/2021 | EPI_ISL_2987696 | OL461589 | B.1.1.7   | GRY | 40 | C241T,C913T,G2281A,C3037T,C3267T,C5388A,T6954C,A12162G,C13665T,C14408T,C14676T,C15279T,T16176C,A17615G,C18747T,C20844T,A21137G,A23063T,C23271A,A23403G,C23604A,C23709T,T24506G,G24914C,G25135T,C26110T,G26828T,C27972T,G27987T,G28048T,A28111G,G28280C,A28281T,T28282A,G28881A,G28882A,G28883C,C28977T,C29095T                                                                                                                                                                                                                                                                                                                                     | N:D3L:N:R203K,N:G204R,N:S235F,ORF1a:T1001,ORF1a:A1708D,ORF1a:I2230T,ORF1a:Q3966R,ORF1b:P314L,ORF1b:K1383R,ORF1b:K2557R,ORF3a:P240S,ORF8:Q27*,ORF8:V32L,ORF8:R52I,ORF8:Y73C,S:N501Y,S:A570D,S:D614G,S:P681H,S:T716I,S:S982A,S:D1118H,S:K1191N              | 24 | 96   |

|                                            |                 |          |           |     |    |                                                                                                                                                                                                                                                                                                                                                                                                            |                                                                                                                                                                                                                                                  |   |     |
|--------------------------------------------|-----------------|----------|-----------|-----|----|------------------------------------------------------------------------------------------------------------------------------------------------------------------------------------------------------------------------------------------------------------------------------------------------------------------------------------------------------------------------------------------------------------|--------------------------------------------------------------------------------------------------------------------------------------------------------------------------------------------------------------------------------------------------|---|-----|
| hCoV-19/Mexico/SIN-CIAD-MZT_S7079/2021     | EPI_ISL_2987713 | OL461590 | B.1.1.7   | GRY | 38 | C241T,C913T,C3037T,C3267T,C5388A,C5526T,C5986T,G6421T,T6954C,T7204C,C9298T,C14408T,C14676T,C15279T,T16176C,A17153G,G18880T,C19554T,G22094A,A23063T,C23271A,A23403G,G23604A,C23709T,C24374T,T24506G,G24914C,C27972T,G28048T,A28111G,G28280C,A28281T,T28282A,G28774T,G28881A,G28882A,G28883C,C28977T                                                                                                         | N:D3L:N:L167F,N:R203K,N:G204R,N:S235F,ORF1a:T1001,ORF1a:A1708D,ORF1a:T1754I,ORF1a:I2230T,ORF1b:P314L,ORF1b:Y1229C,ORF1b:A1805S,ORF8:Q27*,ORF8:R52I,ORF8:Y73C,S:D178N,S:N501Y,S:A570D,S:D614G,S:P681H,S:T7716I,S:L938F,S:S982A,S:D1118H           | 6 | 0   |
| hCoV-19/Mexico/SIN-CIAD-MZT_S7103/2021     | EPI_ISL_2987717 | OL461591 | B.1.1.7   | GRY | 39 | C241T,C913T,C3037T,C3267T,C5388A,C5526T,C5986T,G6421T,T6954C,C7195T,T7204C,C9298T,C14408T,C14676T,C15279T,T16176C,A17153G,G18880T,C19554T,G22094A,A23063T,C23271A,A23403G,C23604A,C23709T,C24374T,T24506G,G24914C,C27972T,G28048T,A28111G,G28280C,A28281T,T28282A,G28774T,G28881A,G28882A,G28883C,C28977T                                                                                                  | N:D3L:N:L167F,N:R203K,N:G204R,N:S235F,ORF1a:T1001,ORF1a:A1708D,ORF1a:T1754I,ORF1a:I2230T,ORF1b:P314L,ORF1b:Y1229C,ORF1b:A1805S,ORF8:Q27*,ORF8:R52I,ORF8:Y73C,S:D178N,S:N501Y,S:A570D,S:D614G,S:P681H,S:T7716I,S:L938F,S:S982A,S:D1118H           | 6 | 17  |
| hCoV-19/Mexico/SIN-CIAD-MZT_S7104/2021     | EPI_ISL_2987718 | OL461592 | B.1.1.7   | GRY | 39 | C241T,C913T,C3037T,C3267T,C5388A,C5526T,C5986T,G6421T,T6954C,C7195T,T7204C,C9298T,C14408T,C14676T,C15279T,T16176C,A17153G,G18880T,C19554T,G22094A,A23063T,C23271A,A23403G,C23604A,C23709T,C24374T,T24506G,G24914C,C27972T,G28048T,A28111G,G28280C,A28281T,T28282A,G28774T,G28881A,G28882A,G28883C,C28977T                                                                                                  | N:D3L:N:L167F,N:R203K,N:G204R,N:S235F,ORF1a:T1001,ORF1a:A1708D,ORF1a:T1754I,ORF1a:I2230T,ORF1b:P314L,ORF1b:Y1229C,ORF1b:A1805S,ORF8:Q27*,ORF8:R52I,ORF8:Y73C,S:D178N,S:N501Y,S:A570D,S:D614G,S:P681H,S:T7716I,S:L938F,S:S982A,S:D1118H           | 6 | 0   |
| hCoV-19/Mexico/SIN-CIAD-MZT_S7130/2021     | EPI_ISL_2987721 | OL461593 | B.1.1.7   | GRY | 38 | C241T,C913T,C1288T,C2110T,C3037T,C3267T,C5388A,C5869T,C5986T,T6954C,C6997T,G7042T,A10195G,C14120T,C14408T,C14676T,C15279T,T16176C,A23063T,C23271A,A23403G,C23604A,C23709T,C24418T,T24506G,G24914C,C27972T,G28048T,G28075T,A28095T,A28111G,G28280C,A28281T,T28282A,G28774T,G28881A,G28882A,G28883C,C28977T                                                                                                  | N:D3L:N:R203K,N:G204R,N:S235F,ORF1a:T1001,ORF1a:A1708D,ORF1a:I2230T,ORF1a:M2259I,ORF1b:P218L,ORF1b:P314L,ORF8:Q27*,ORF8:R52I,ORF8:K68*1F,ORF8:K68*,ORF8:Y73C,S:N501Y,S:A570D,S:D614G,S:P681H,S:T7716I,S:S982A,S:D1118H                           | 6 | 0   |
| hCoV-19/Mexico/SIN-CIAD-MZT_S7130/2021     | EPI_ISL_2987721 | OL461593 | B.1.1.7   | GRY | 38 | C241T,C913T,C3037T,C3267T,A3492G,C5388A,C5986T,G6901A,T6954C,C14408T,C14676T,A14862G,C15279T,T16176C,C21639A,G22801T,A23063T,C23271A,A23403G,C23604A,C23709T,C24374T,T24506G,G24914C,A25998G,C27972T,G28027T,G28048T,A28111G,G28280C,A28281T,T28282A,G28881A,G28882A,G28883C,C28977T                                                                                                                       | N:D3L:N:R203K,N:G204R,N:S235F,ORF1a:T1001,ORF1a:I2230T,ORF1a:M2259I,ORF1b:P218L,ORF1b:P314L,ORF8:Q27*,ORF8:R52I,ORF8:K68*1F,ORF8:K68*,ORF8:Y73C,S:N501Y,S:A570D,S:D614G,S:P681H,S:T7716I,S:S982A,S:D1118H                                        | 6 | 0   |
| hCoV-19/Mexico/SIN-IBT_IMSS_1832/2021      | EPI_ISL_2801707 | OL461594 | B.1.1.7   | GRY | 36 | 8282A,G28881A,G28882A,G28883C,C28977T                                                                                                                                                                                                                                                                                                                                                                      | N:D3L:N:R203K,N:G204R,N:S235F,ORF1a:T1001,ORF1a:I2230T,ORF1a:M2259I,ORF1b:P218L,ORF1b:P314L,ORF8:Q27*,ORF8:R52I,ORF8:K68*1F,ORF8:K68*,ORF8:Y73C,S:N501Y,S:A570D,S:D614G,S:P681H,S:T7716I,S:S982A,S:D1118H                                        | 6 | 0   |
| hCoV-19/Mexico/SIN-IBT_IMSS_1871/2021      | EPI_ISL_2801739 | OL461595 | B.1.1.7   | GRY | 35 | C241T,C913T,C3037T,C3267T,A3492G,C5388A,C5986T,T6954C,C14408T,C14676T,C15279T,T16176C,C16362T,C21639A,C21846T,A23063T,C23271A,A23403G,C23604A,C23709T,C24374T,T24506G,G24914C,C26164T,C27972T,G28048T,A28111G,G28280C,A28281T,T28282A,G2881A,G28882A,G28883C,C28977T                                                                                                                                       | N:D3L:N:R203K,N:G204R,N:S235F,ORF1a:T1001,ORF1a:I2230T,ORF1a:M2259I,ORF1b:P218L,ORF1b:P314L,ORF8:Q27*,ORF8:R52I,ORF8:K68*1F,ORF8:K68*,ORF8:Y73C,S:N501Y,S:A570D,S:D614G,S:P681H,S:T7716I,S:S982A,S:D1118H                                        | 6 | 0   |
| hCoV-19/Mexico/SIN-IBT_IMSS_1879/2021      | EPI_ISL_2801745 | OL461596 | B.1.1.7   | GRY | 31 | 7972T,G28048T,A28111G,G28280C,A28281T,T28282A,G2881A,G28882A,G28883C,C28977T                                                                                                                                                                                                                                                                                                                               | N:D3L:N:R203K,N:G204R,N:S235F,ORF1a:T1001,ORF1a:I2230T,ORF1a:M2259I,ORF1b:P218L,ORF1b:P314L,ORF8:Q27*,ORF8:R52I,ORF8:K68*1F,ORF8:K68*,ORF8:Y73C,S:N501Y,S:A570D,S:D614G,S:P681H,S:T7716I,S:S982A,S:D1118H                                        | 6 | 0   |
| hCoV-19/Mexico/SIN-LANGEBIO_IMSS_1269/2021 | EPI_ISL_2942427 | OL461597 | B.1.1.7   | GRY | 32 | 27972T,G28048T,A28111G,G28280C,A28281T,T28282A,G2881A,G28882A,G28883C,C28977T,C222T,C241T,C913T,C2110T,C3037T,C3267T,C4423T,C5388A,C5986T,G6681T,T6954C,G7042T,A10359G,C14120T,C14408T,C14676T,C15279T,T16176C,C17762T,A23063T,C23271A,A23403G,C23604A,G23608T,C23709T,T24506G,G24914C,T25180C,T27328C,C27972T,G28048T,A28095T,A28111G,G28280C,A28281T,T28282A,G2881A,G28882A,G28883C,C28977T              | N:D3L:N:R203K,N:G204R,N:S235F,ORF1a:T1001,ORF1a:I2230T,ORF1a:M2259I,ORF1b:P218L,ORF1b:P314L,ORF8:Q27*,ORF8:R52I,ORF8:K68*1F,ORF8:K68*,ORF8:Y73C,S:N501Y,S:A570D,S:D614G,S:P681H,S:T7716I,S:S982A,S:D1118H                                        | 6 | 0   |
| hCoV-19/Mexico/SIN-LANGEBIO_IMSS_1277/2021 | EPI_ISL_2942433 | OL461598 | B.1.1.7   | GRY | 40 | C241T,C913T,C3037T,C3267T,C5388A,C5526T,C5986T,G6421T,T6954C,T7204C,C9298T,A13357G,C14408T,C14676T,C15279T,T16176C,A17153G,G18880T,C19554T,G22094A,A23063T,C23271A,A23403G,C23604A,C23709T,C24374T,T24506G,G24914C,C27972T,C28006T,G28048T,A2811G,G28280C,A28281T,T28282A,G28774T,G28881A,G28882A,G28883C,C28977T                                                                                          | N:D3L:N:L167F,N:R203K,N:G204R,N:S235F,ORF1a:T1001,ORF1a:A1708D,ORF1a:T1754I,ORF1a:I2230T,ORF1b:P314L,ORF1b:Y1229C,ORF1b:A1805S,ORF8:Q27*,ORF8:P38L,ORF8:R52I,ORF8:Y73C,S:D178N,S:N501Y,S:A570D,S:D614G,S:P681H,S:T7716I,S:L938F,S:S982A,S:D1118H | 6 | 16  |
| hCoV-19/Mexico/SIN-LANGEBIO_IMSS_1291/2021 | EPI_ISL_2942444 | OL461599 | B.1.1.7   | GRY | 40 | C241T,C913T,C3037T,C3267T,C5388A,C5986T,T6954C,A8010T,C14408T,C14676T,C15279T,T16176C,T16563A,C16580T,G19101T,A23063T,C23170T,C23271A,A23403G,C23604A,C23709T,T24506G,G24914C,C25626T,G26959A,C27972T,G28048T,A28111G,G28280C,A28281T,T28282A,A28295C,G28881A,G28882A,G28883C,C28977T                                                                                                                      | N:D3L:N:R203K,N:G204R,N:S235F,ORF1a:T1001,ORF1a:I2230T,ORF1a:M2259I,ORF1b:P218L,ORF1b:P314L,ORF8:Q27*,ORF8:R52I,ORF8:K68*1F,ORF8:K68*,ORF8:Y73C,S:N501Y,S:A570D,S:D614G,S:P681H,S:T7716I,S:S982A,S:D1118H                                        | 6 | 16  |
| hCoV-19/Mexico/SIN-LANGEBIO_IMSS_1293/2021 | EPI_ISL_2942445 | OL461600 | B.1.1.7   | GRY | 39 | C241T,C913T,C3037T,C3267T,A3492G,C5388A,C5986T,T6954C,C14408T,C14676T,C15279T,T16176C,C16362T,C21639A,C21846T,A23063T,C23271A,A23403G,C23604A,C23709T,C24374T,T24506G,G24914C,A25164T,C27972T,G28048T,A28111G,G28280C,A28281T,T28282A,G2881A,G28882A,G28883C,C28977T                                                                                                                                       | N:D3L:N:R203K,N:G204R,N:S235F,ORF1a:T1001,ORF1a:I2230T,ORF1a:M2259I,ORF1b:P218L,ORF1b:P314L,ORF8:Q27*,ORF8:R52I,ORF8:K68*1F,ORF8:K68*,ORF8:Y73C,S:N501Y,S:A570D,S:D614G,S:P681H,S:T7716I,S:S982A,S:D1118H                                        | 6 | 14  |
| hCoV-19/Mexico/SIN-LANGEBIO_IMSS_1305/2021 | EPI_ISL_2942455 | OL461601 | B.1.1.7   | GRY | 35 | C241T,C913T,C2110T,C2299T,C3037T,C3267T,C4582T,C5388A,C5986T,T6954C,G7042T,T9379C,A10195G,C11750T,C14120T,C14408T,C14676T,C15279T,T16176C,G20718T,C21036T,A23063T,C23271A,A23403G,C23604A,C23709T,T24506G,G24914C,G26172A,C27972T,G28048T,G28075T,A28095T,A28111G,G28280C,A28281T,T28282A,G2881A,G28882A,G28883C,C28977T                                                                                   | N:D3L:N:R203K,N:G204R,N:S235F,ORF1a:T1001,ORF1a:A1708D,ORF1a:I2230T,ORF1a:M260I,ORF8:Q27*,ORF8:R52I,ORF8:G61F,ORF8:K68*,ORF8:Y73C,S:N501Y,S:A570D,S:D614G,S:P681H,S:T7716I,S:S982A,S:D1118H                                                      | 6 | 83  |
| hCoV-19/Mexico/SLP_IBT_IMSS_1474/2021      | EPI_ISL_2681212 | OL461602 | B.1.1.7   | GRY | 41 | T,A28095T,A28111G,G28280C,A28281T,T28282A,G2881A,G28882A,G28883C,C28977T                                                                                                                                                                                                                                                                                                                                   | N:D3L:N:R203K,N:G204R,N:S235F,ORF1a:T1001,ORF1a:A1708D,ORF1a:I2230T,ORF1a:M2259I,ORF1b:P218L,ORF1b:P314L,ORF8:Q27*,ORF8:R52I,ORF8:K68*1F,ORF8:K68*,ORF8:Y73C,S:N501Y,S:A570D,S:D614G,S:P681H,S:T7716I,S:S982A,S:D1118H                           | 6 | 83  |
| hCoV-19/Mexico/SLP-IBT_IMSS_1823/2021      | EPI_ISL_2801699 | OL461603 | B.1.1.7   | GR  | 26 | C241T,G626A,C913T,C3037T,C3267T,C5388A,C5986T,C6636T,T6954C,G7042T,C10138T,A10195G,C14120T,C14408T,C14676T,C15279T,T16176C,C16260T,C20031T,A23063T,C23271A,A23403G,C23604A,C23709T,T24506G,G24914C,C26176T,C26313T,C2773T,C27972T,G28048T,A28095T,A28111G,G28280C,A28281T,T28282A,G2881A,G28882A,G28883C,C28977T                                                                                           | N:D3L:N:R203K,N:G204R,N:S235F,ORF1a:T1001,ORF1a:A1708D,ORF1a:I2230T,ORF1a:M2259I,ORF1b:P218L,ORF1b:P314L,ORF8:Q27*,ORF8:R52I,ORF8:K68*1F,ORF8:K68*,ORF8:Y73C,S:N501Y,S:A570D,S:D614G,S:P681H,S:T7716I,S:S982A,S:D1118H                           | 6 | 664 |
| hCoV-19/Mexico/SLP-IBT_IMSS_1824/2021      | EPI_ISL_2801700 | OL461604 | B.1.1.7   | GR  | 39 | C241T,C913T,C2110T,C3037T,C3267T,G4300T,G4900T,C5388A,C5986T,G6576T,T6954C,T7984C,C10747T,C14120T,C14408T,C14676T,C15279T,T16176C,C18120T,C19390T,A23063T,C23271A,T2332C,A23403G,C23604A,C23709T,T24506G,G24914C,C26176T,C26313T,C2773T,C27972T,G28048T,A28095T,A28111G,G28280C,A28281T,T28282A,G2881A,G28882A,G28883C,C28977T                                                                             | N:D3L:N:A182S,N:R203K,N:G204R,N:S235F,ORF1a:T1001,ORF1a:A1708D,ORF1a:I2230T,ORF1b:P218L,ORF1b:P314L,ORF8:Q27*,ORF8:R52I,ORF8:K68*1F,ORF8:K68*,ORF8:Y73C,S:N501Y,S:A570D,S:D614G,S:P681H,S:T7716I,S:S982A,S:D1118H                                | 6 | 0   |
| hCoV-19/Mexico/SLP-IBT_IMSS_1830/2021      | EPI_ISL_2801705 | OL461605 | B.1.1.7   | GRY | 45 | G28048T,A28095T,A28111G,G28280C,A28281T,T28282A,G2881A,G28882A,G28883C,C28977T                                                                                                                                                                                                                                                                                                                             | N:D3L:N:R203K,N:G204R,N:S235F,ORF1a:T1001,ORF1a:A1708D,ORF1a:I2230T,ORF1a:M2259I,ORF1b:P218L,ORF1b:P314L,ORF8:Q27*,ORF8:R52I,ORF8:K68*1F,ORF8:K68*,ORF8:Y73C,S:N501Y,S:A570D,S:D614G,S:P681H,S:T7716I,S:S982A,S:D1118H                           | 6 | 0   |
| hCoV-19/Mexico/SLP-LANGEBIO_IMSS_0974/2021 | EPI_ISL_2671700 | OL461606 | B.1.1.7   | GRY | 40 | C241T,C906T,C913T,C1889T,C2147A,C3037T,C3267T,A5111G,C5388A,C5986T,T6954C,A12162G,C14408T,C14676T,C15279T,C15720T,G16122T,T16176C,A171615G,G20578T,A21137G,A23063T,C23271A,A23403G,C23604A,C23709T,T24506G,G24914C,G25135T,C26110T,C27972T,G28048T,A28111G,G28280C,A28281T,T28282A,G2881A,G28882A,G28883C,C28977T                                                                                          | N:D3L:N:R203K,N:G204R,N:S416L,ORF1a:T1001,ORF1a:A1708D,ORF1a:K3353R,ORF1a:T4311I,ORF1b:P218L,ORF1b:P314L,ORF8:Q27*,ORF8:R52I,ORF8:Y73C,S:D138Y,S:E484K,S:N501Y,S:A570D,S:D614G,S:P681H,S:T7716I,S:D1118H                                         | 6 | 91  |
| hCoV-19/Mexico/SLP-LANGEBIO_IMSS_1326/2021 | EPI_ISL_2942471 | OL461607 | B.1.1.291 | GR  | 31 | C27972T,G28048T,A28111G,G28280C,A28281T,T28282A,G2881A,G28882A,G28883C,C295C222T,C241T,C913T,C2110T,A2895G,C3037T,C3267T,C3743T,C5388A,C5986T,T6954C,G7042T,C12733T,C14120T,C14408T,C14676T,A15046G,C15279T,T16176C,C17762T,C21846T,G22630T,A23063T,C23271A,A23403G,C23604A,C23709T,T24506G,G24914C,T25180C,G25311T,C27741T,C27972T,G28048T,A28111G,G28280C,A28281T,T28282A,G2881A,G28882A,G28883C,C28977T | N:D3L:N:R203K,N:G204R,N:S235F,ORF1a:T1001,ORF1a:A1708D,ORF1a:K3353R,ORF1a:T4311I,ORF1b:P218L,ORF1b:P314L,ORF8:Q27*,ORF8:R52I,ORF8:Y73C,S:D138Y,S:E484K,S:N501Y,S:A570D,S:D614G,S:P681H,S:T7716I,S:D1118H                                         | 6 | 0   |
| hCoV-19/Mexico/SLP-LANGEBIO_IMSS_1327/2021 | EPI_ISL_2942472 | OL461608 | B.1.1.7   | GRY | 43 | C27972T,G28048T,A28111G,G28280C,A28281T,T28282A,G2881A,G28882A,G28883C,C28977T                                                                                                                                                                                                                                                                                                                             | N:D3L:N:R203K,N:G204R,N:S235F,ORF1a:T1001,ORF1a:A1708D,ORF1a:K3353R,ORF1a:T4311I,ORF1b:P218L,ORF1b:P314L,ORF8:Q27*,ORF8:R52I,ORF8:Y73C,S:D138Y,S:E484K,S:N501Y,S:A570D,S:D614G,S:P681H,S:T7716I,S:D1118H                                         | 6 | 0   |







|                                                |                 |          |         |     |    |                                                                                                                                                                                                                                                                                                                                                                                                                                                                                                                                                                                                                                                              |                                                                                                                                                                                                                                                                                |    |      |
|------------------------------------------------|-----------------|----------|---------|-----|----|--------------------------------------------------------------------------------------------------------------------------------------------------------------------------------------------------------------------------------------------------------------------------------------------------------------------------------------------------------------------------------------------------------------------------------------------------------------------------------------------------------------------------------------------------------------------------------------------------------------------------------------------------------------|--------------------------------------------------------------------------------------------------------------------------------------------------------------------------------------------------------------------------------------------------------------------------------|----|------|
| hCoV-19/Mexico/VER_IBT_IMSS_1664/2021          | EPI_ISL_2681180 | OL461648 | B.1.1.7 | GRY | 40 | C241T,C913T,C2110T,G3004T,C3037T,C3267T,C5388A,C5986T,T6954C,G7042T,C7609T,C10525 T,C10789T,C14120T,C14408T,C14676T,C15279T,T16176C,A23063T,C23271A,A23403G,G23593 T,C23604A,C23709T,T24506G,G24914C,C26110T,C26735T,C27972T,G28048T,A28095T,A28111 G,G28280C,A28281T,T28282A,A28804G,G28881A,G28882A,G28883C,C28977T                                                                                                                                                                                                                                                                                                                                        | N:D3L:N:R203K,N:G204R,N:S235F,ORF1a:E913D,ORF1a:T1001,ORF1a:A1708 D,ORF1a:I2230T,ORF1a:M2259,ORF1b:P218L,ORF1b:P314L,ORF3a:P240S,ORF8:Q27*,ORF8:R52,ORF8:K68*,ORF8:Y73C,S:N501Y,S:A570D,S:D614G,S:P681H,S,T716I,S:S982A,S:D1118H                                               | 6  | 0    |
| hCoV-19/Mexico/VER_INER_IMSS_00966/2021        | EPI_ISL_2091407 | OL461649 | B.1.1.7 | GRY | 34 | C241T,C913T,C2453T,C3037T,C3267T,C5388A,C5986T,T6954C,C9611T,C14408T,C14676T,C152 79T,T16176C,A23063T,C23271A,A23403G,C23604A,C23709T,T24506G,G24914C,G252 17T,G26727T,C27972T,G28048T,A28111G,G28280C,A28281T,T28282A,G28881A,G28882A,G288 2A,G28883C,C28977T                                                                                                                                                                                                                                                                                                                                                                                               | N:D3L:N:R203K,N:G204R,N:S235F,ORF1a:L730F,ORF1a:T1001,ORF1a: A1708D,ORF1a:I2230T,ORF1a:L3116F,ORF1b:P314L,ORF7a:P84S,ORF8:Q27*, ORF8:R52,ORF8:Y73C,S:S98F,S:D138H,S:N501Y,S:A570D,S:D614G,S:P681H,S, T716I,S:S982A,S:D1118H                                                    | 24 | 789  |
| hCoV-19/Mexico/VER_LANGEBIO_IMSS_0428/2021     | EPI_ISL_1662210 | OL461650 | B.1.1.7 | GRY | 34 | C241T,C913T,C1527T,C3037T,C3267T,C5388A,C5986T,C6196T,T6954C,A8848G,C14408T,C1467 6T,C15279T,T16176C,A23063T,C23271A,A23403G,C23604A,C23709T,T24506G,G24914C,G252 17T,G26727T,C27972T,G28048T,A28111G,G28280C,A28281T,T28282A,G28881A,G28882A,G28 82A,G28883C,C28977T                                                                                                                                                                                                                                                                                                                                                                                        | N:D3L:N:R203K,N:G204R,N:S235F,ORF1a:T436I,ORF1a:T1001,ORF1a: A1708D,ORF1a:I2230T,ORF1b:P314L,ORF8:Q27*,ORF8:R52,ORF8:Y73C,S:N50 1Y,S:A570D,S:D614G,S:P681H,S:T716I,S:S982A,S:D1118H,S:E61219C                                                                                  | 21 | 0    |
| hCoV-19/Mexico/VER_LANGEBIO_IMSS_11722-NC/2021 | EPI_ISL_2970055 | OL461651 | B.1.1.7 | GRY | 39 | C241T,C913T,C15279T,T16176C,C18570T,C21855T,G21974C,A23063T,C23271A,A23403G,C23604 A,C23709T,T24506G,G24914C,C25609T,A27377C,C27972T,G28048T,A28111G,G28280C,A2828 1T,T28282A,A28295G,G28881A,G28882A,G28883C,C28977T,G29041T                                                                                                                                                                                                                                                                                                                                                                                                                                | N:D3L:N:R203K,N:G204R,N:S235F,ORF1a:I2230T,ORF1a:L3116F,ORF1b:P314L,OR F3a:L73F,ORF6:E59A,ORF8:Q27*,ORF8:R52,ORF8:Y73C,S:S98F,S:D138H,S:N5 01Y,S:A570D,S:D614G,S:P681H,S,T716I,S:S982A,S:D1118H                                                                                | 27 | 1047 |
| hCoV-19/Mexico/VER-IBT_IMSS_1892/2021          | EPI_ISL_2801760 | OL461652 | B.1.1.7 | GRY | 36 | 282A,G28881A,G28882A,G28883C,C28977T                                                                                                                                                                                                                                                                                                                                                                                                                                                                                                                                                                                                                         | N:D3L:N:R203K,N:G204R,N:S235F,ORF1a:M519S,ORF1a:T1001,ORF1a:M1586 I,ORF1a:A1708D,ORF1a:V1887T,ORF1a:I2230T,ORF1a:M3087T,ORF1a:Q3966R, ORF1b:P314L,ORF1b:K1383R,ORF1b:K2557R,ORF7a:V93F,ORF8:Q27*,ORF8:R 52,ORF8:Y73C,S:N501Y,S:A570D,S:D614G,S:P681H,S,T716I,S:S982A,S:D1118 H | 24 | 789  |
| hCoV-19/Mexico/VER-IBT_IMSS_1923/2021          | EPI_ISL_2801788 | OL461653 | B.1.1.7 | GRY | 42 | T,C27972T,G28048T,A28111G,G28280C,A28281T,T28282A,G28881A,G28882A,G28883C,C2897 2T,C241T,C913T,A2317T,C2453T,C3037T,C3267T,C5388A,C5986T,C6433T,T6954C,C9611T,C11750 T,C14408T,C14676T,C15279T,T16176C,C21008T,C21855T,G21974C,A23063T,C23271A,A23403G ,C23604A,C23709T,T24506G,G24914C,C27643T,C27972T,G28048T,A28111G,G28280C,A28281 T,T28282A,A28295G,G28881A,G28882A,G28883C,C28977T                                                                                                                                                                                                                                                                     | N:D3L:N:R203K,N:G204R,N:S235F,ORF1a:K684N,ORF1a:L730F,ORF1a: T1001,ORF1a:A1708D,ORF1a:I2230T,ORF1a:L3116F,ORF1a:K3829F,ORF1b:P3 14L,ORF1b:T2514I,ORF7a:P84S,ORF8:Q27*,ORF8:R52,ORF8:Y73C,S:S98F,S:D1 118H                                                                      | 27 | 716  |
| hCoV-19/Mexico/VER-IBT_IMSS_1983/2021          | EPI_ISL_2801841 | OL461654 | B.1.1.7 | GRY | 38 | T,T28282A,A28295G,G28881A,G28882A,G28883C,C28977T                                                                                                                                                                                                                                                                                                                                                                                                                                                                                                                                                                                                            | N:D3L:N:R203K,N:G204R,N:S235F,ORF1a:K684N,ORF1a:L730F,ORF1a: T1001,ORF1a:A1708D,ORF1a:I2230T,ORF1a:L3116F,ORF1a:K3829F,ORF1b:P3 14L,ORF1b:T2514I,ORF7a:P84S,ORF8:Q27*,ORF8:R52,ORF8:Y73C,S:S98F,S:D1 118H                                                                      | 27 | 101  |
| hCoV-19/Mexico/VER-IBT_IMSS_1990/2021          | EPI_ISL_2801847 | OL461655 | B.1.1.7 | GRY | 40 | C241T,C913T,C2453T,C3037T,C3267T,C5388A,C5986T,C6433T,T6954C,C3867T,C9611T, C11235T,C11750T,C14408T,C14676T,C15279T,T16176C,C21008T,C21855T,G21974C,A23063T, C23271A,A23403G,C23604A,C23709T,T24506G,G24914C,C27643T,C27972T,G28048T,A28111 G,G28280C,A28281T,T28282A,A28295G,G28881A,G28882A,G28883C,C28977T                                                                                                                                                                                                                                                                                                                                                | N:D3L:N:R203K,N:G204R,N:S235F,ORF1a:K684N,ORF1a:L730F,ORF1a: T1001,ORF1a:A1708D,ORF1a:I2230T,ORF1a:L3116F,ORF1a:K3829F,ORF1b:P3 14L,ORF1b:T2514I,ORF7a:P84S,ORF8:Q27*,ORF8:R52,ORF8:Y73C,S:S98F,S:D1 118H                                                                      | 28 | 0    |
| hCoV-19/Mexico/VER-IBT_IMSS_1998/2021          | EPI_ISL_2801851 | OL461656 | B.1.1.7 | GRY | 36 | T154C,C241T,C913T,C3037T,C3267T,C5388A,C5944T,C5986T,T6954C,C7564T,C996T,C13585T, C14408T,C14676T,T15096C,C15279T,T16176C,A18184G,C21614T,G21901A,C22987T,A23063T, C23271A,A23403G,C23604A,C23709T,T24506G,G24914C,C25509A,C27972T,G28048T,A28095 T,A28111G,G28280C,A28281T,T28282A,G28881A,G28882A,G28883C,C28977T                                                                                                                                                                                                                                                                                                                                          | N:D3L:N:R203K,N:G204R,N:S235F,ORF1a:T1001,ORF1a:A1708D,ORF1a:I2230 T,ORF1b:P314L,ORF1b:M1573V,ORF8:Q27*,ORF8:R52,ORF8:K68*,ORF8:Y73C ,S:L18F,S:N501Y,S:A570D,S:D614G,S:P681H,S,T716I,S:S982A,S:D1118H                                                                          | 21 | 101  |
| hCoV-19/Mexico/VER-IBT_IMSS_2043/2021          | EPI_ISL_2801877 | OL461657 | B.1.1.7 | GRY | 41 | T,A28111G,G28280C,A28281T,T28282A,G28881A,G28882A,G28883C,C28977T                                                                                                                                                                                                                                                                                                                                                                                                                                                                                                                                                                                            | N:D3L:N:R203K,N:G204R,N:S235F,ORF1a:V270L,ORF1a:L730F,ORF1a:T100 1,ORF1a:A1708D,ORF1a:I2230T,ORF1a:L3116F,ORF1b:P314L,ORF3a:L73F,OR F8:Q27*,ORF8:R52,ORF8:Y73C,S:S98F,S:D138H,S:N501Y,S:A570D,S:D614G,S, P681H,S,T716I,S:S982A,S:D1118H                                        | 25 | 1    |
| hCoV-19/Mexico/VER-LANGEBIO_IMSS_1103/2021     | EPI_ISL_2671737 | OL461658 | B.1.1.7 | GRY | 34 | G28883C,C28977T,G29081T                                                                                                                                                                                                                                                                                                                                                                                                                                                                                                                                                                                                                                      | N:D3L:N:R203K,N:G204R,N:S235F,ORF1a:L730F,ORF1a:T1001,ORF1a: A1708D,ORF1a:S2103F,ORF1a:I2230T,ORF1a:L3116F,ORF1b:P314L,ORF1b:T2 514I,ORF7a:P84S,ORF8:Q27*,ORF8:R52,ORF8:Y73C,S:S98F,S:D138H,S:N501Y, S:A570D,S:D614G,S:P681H,S:T716I,S:S982A,S:D1118H                          | 6  | 6    |
| hCoV-19/Mexico/VER-LANGEBIO_IMSS_1105/2021     | EPI_ISL_2671739 | OL461659 | B.1.1.7 | GRY | 37 | A,A28295G,G28881A,G28882A,G28883C,C28977T                                                                                                                                                                                                                                                                                                                                                                                                                                                                                                                                                                                                                    | N:D3L:N:R203K,N:G204R,N:S235F,ORF1a:G519S,ORF1a:T1001,ORF1a:A1708 D,ORF1a:V1887T,ORF1a:I2230T,ORF1a:M3087T,ORF1a:Q3966R,ORF1b:P314L, ORF1b:K1383R,ORF1b:K2557R,ORF8:Q27*,ORF8:R52,ORF8:Y73C,S:N501Y,S:A 570D,S:D614G,S:P681H,S:T716I,S:S982A,S:D1118H,S:K1191N                 | 25 | 0    |
| hCoV-19/Mexico/VER-LANGEBIO_IMSS_1134/2021     | EPI_ISL_2671744 | OL461660 | B.1.1.7 | GRY | 40 | C241T,C913T,G1820A,C3037T,C3267T,C5388A,G5924A,C5986T,T6954C,G9526T,A12162 G,C14408T,C14676T,C15279T,C15720T,T16176C,A17615G,T19363C,A21137G,A23063T,T23197 C,C23248T,C23271A,A23403G,C23604A,C23709T,T24506G,G24914C,G25135T,C27972T,G2804 8T,A28111G,G28280C,A28281T,T28282A,G28881A,G28882A,G28883C,C28977T                                                                                                                                                                                                                                                                                                                                               | N:D3L:N:R203K,N:G204R,N:S235F,ORF1a:G519S,ORF1a:T1001,ORF1a:A1708 D,ORF1a:V1887T,ORF1a:I2230T,ORF1a:M3087T,ORF1a:Q3966R,ORF1b:P314L, ORF1b:K1383R,ORF1b:K2557R,ORF8:Q27*,ORF8:R52,ORF8:Y73C,S:N501Y,S:A 570D,S:D614G,S:P681H,S:T716I,S:S982A,S:D1118H,S:K1191N                 | 25 | 0    |
| hCoV-19/Mexico/VER-LANGEBIO_IMSS_1424/2021     | EPI_ISL_2942548 | OL461661 | B.1.1.7 | GRY | 39 | 11G,G28280C,A28281T,T28282A,G28881A,G28882A,G28883C,C28977T                                                                                                                                                                                                                                                                                                                                                                                                                                                                                                                                                                                                  | N:D3L:N:R203K,N:G204R,N:S235F,ORF1a:G519S,ORF1a:T1001,ORF1a:M1586 I,ORF1a:A1708D,ORF1a:V1887T,ORF1a:I2230T,ORF1a:M3087T,ORF1a:Q3966R, ORF1b:P314L,ORF1b:K1383R,ORF1b:K2557R,ORF8:Q27*,ORF8:R52,ORF8:Y7 3C,S:N501Y,S:A570D,S:D614G,S:P681H,S,T716I,S:S982A,S:D1118H,S:K1191N    | 26 | 224  |
| hCoV-19/Mexico/VER-LANGEBIO_IMSS_1426/2021     | EPI_ISL_2942550 | OL461662 | B.1.1.7 | GRY | 42 | C241T,C913T,C2110T,G3004T,C3037T,C3267T,C5388A,C5986T,T6954C,G7042T,C9996T,C10525 T,C10789T,C14120T,C14408T,C14676T,C15279T,T16176C,A23063T,C23271A,A23403G,G23593 T,C23604A,C23709T,T24506G,G24914C,C25844T,C26110T,C26735T,C27389T,C27972T,G28048 T,A28095T,A28111G,G28280C,A28281T,T28282A,A28804G,G28881A,G28882A,G28883C,C289 89T,C1613T,C2453T,C3037T,C3267T,C5388A,T6954C,C9611T,C14408T,C14676T,T151 95C,C15279T,T16176C,C21855T,G21974C,A23063T,C23271A,A23403G,C23604A,C23709T,T245 06G,G24914C,G25455T,C27972T,G28048T,A28111G,G28280C,A28281T,T28282A,A28295G,G 28881A,G28882A,G28883C,C28977T                                                   | N:D3L:N:R203K,N:G204R,N:S235F,ORF1a:I2230T,ORF1a:M2259,ORF1a:G5244L,ORF1b:P218L,ORF1b: P314L,ORF3a:T151I,ORF3a:P240S,ORF8:Q27*,ORF8:R52,ORF8:K68*,ORF8:Y73C,S:N501Y, S:A570D,S:D614G,S:P681H,S,T716I,S:S982A,S:D1118H                                                          | 26 | 0    |
| hCoV-19/Mexico/VER-LANGEBIO_IMSS_1428/2021     | EPI_ISL_2942551 | OL461663 | B.1.1.7 | GRY | 35 | 8881A,G28882A,G28883C,C28977T                                                                                                                                                                                                                                                                                                                                                                                                                                                                                                                                                                                                                                | N:D3L:N:R203K,N:G204R,N:S235F,ORF1a:E913D,ORF1a:T1001,ORF1a:A1708 D,ORF1a:I2230T,ORF1a:M2259,ORF1a:S3244L,ORF1b:P218L,ORF1b:P314L,OR F3a:L73F,ORF6:E59A,ORF8:Q27*,ORF8:R52,ORF8:Y73C,S:S98F,S:D138H,S:N501 Y,S:A570D,S:D614G,S:P681H,S,T716I,S:S982A,S:D1118H                  | 26 | 0    |
| hCoV-19/Mexico/VER-LANGEBIO_IMSS_1750/2021     | EPI_ISL_2942831 | OL461664 | B.1.1.7 | GRY | 41 | C241T,C913T,C3004T,C3037T,C3267T,C5388A,C5986T,T6954C,C7765T,C10789T,C14120T,C144 08T,C14676T,G14857T,C15279T,G15672C,C15810T,T16176C,G20679T,T2219C,G22567T,A230 63T,C23271A,A23403G,C23604A,C23709T,T24506G,G24914C,C25731T,C26110T,C26735T,C2 002T,C27972T,G28048T,A28095T,A28111G,G28280C,A28281T,T28282A,A28804G,G28881A,G2 8882A,C241T,C913T,C3037T,C3267T,C5388A,C5986T,T6954C,C7604T,C9693T,C11572T,C11824A,C144 08T,C14676T,T14910C,C15279T,T16176C,G18651A,T2304C,A23063T,C23271A,A23403G,C23 604A,C23709T,T24506G,G24914C,G25218T,C2553T,G25660C,C27615T,C27972T,G28048T,A28 095T,A28111G,G28280C,A28281T,T28282A,G28881A,G28882A,G28883C,C28977T | N:D3L:N:R203K,N:G204R,N:S235F,ORF1a:A1708D,ORF1a:I2230 T,ORF1a:A3143V,ORF1b:P314L,ORF3a:A54V,ORF3a:V90L,ORF8:Q27*,ORF8:R 52,ORF8:K68*,ORF8:Y73C,S:S494P,S:N501Y,S:A570D,S:D614G,S:P681H,S,T716I ,S:S982A,S:D1118H,S:G1219V                                                     | 24 | 655  |





|                                            |                 |          |         |     |    |                                                                                                                                                                                                                                                                                                                                                         |                                                                                                                                                                                                                                                                   |   |     |
|--------------------------------------------|-----------------|----------|---------|-----|----|---------------------------------------------------------------------------------------------------------------------------------------------------------------------------------------------------------------------------------------------------------------------------------------------------------------------------------------------------------|-------------------------------------------------------------------------------------------------------------------------------------------------------------------------------------------------------------------------------------------------------------------|---|-----|
| hCoV-19/Mexico/ZAC_IBT_IMSS_1472/2021      | EPI_ISL_2681092 | OL461684 | B.1.1.7 | GRY | 38 | C241T,C913T,C2453T,C3037T,C3267T,C5388A,C5986T,T6954C,G9611T,C14408T,C14676T,C15279T,T16176C,C18115T,C21855T,G21974C,T2469C,A23063T,C23271A,A23403G,C23604A,C23709T,T24506G,G24914C,C2789T,C27972T,G28048T,A28111G,G28280C,A28281T,T28282A,A28295G,C28348T,G28881A,G28882A,G28883C,C28977T,C29098T                                                      | N:D3L:N:N8D,N:R203K,N:G204R,N:S235F,ORF1a:L730F,ORF1a:T1001,ORF1a:A1708D,ORF1a:I2230T,ORF1a:L3116F,ORF1b:P314L,ORF1b:H1550Y,ORF8:Q27*7*,ORF8:R52I,ORF8:Y73C,ORF9b:A225V,S598F,S:D138H,S:N501Y,S:A570D,S:D614G,S:P681H,S:T716I,S:S982A,S:D1118H                    | 6 | 0   |
| hCoV-19/Mexico/ZAC_IBT_IMSS_1480/2021      | EPI_ISL_2681142 | OL461685 | B.1.1.7 | GRY | 37 | 282A,C28531T,G28881A,G28882A,G28883C,C28977T<br>C241T,C913T,C12110T,C3037T,C3267T,C5388A,C5986T,T6954C,G7042T,C12141A,C12754T,C14120T,C14408T,C14676T,C15279T,T16176C,T17583G,A23063T,C23271A,A23403G,C23604A,C23709T,T24506G,G24914C,C25624T,C27972T,G28048T,A28111G,G28280C,A28281T,T28282A,C28531T,G28881A,G28882A,G28883C,C28977T                   | N:D3L:N:R203K,N:G204R,N:S235F,ORF1a:T1001,ORF1a:A1708D,ORF1a:I2230T,ORF1a:M2259I,ORF1a:T3959N,ORF1b:P218L,ORF1b:P314L,ORF3a:H78Y,ORF8:Q27*7*,ORF8:R52I,ORF8:K68*,ORF8:Y73C,ORF9b:T83I,S:N501Y,S:A570D,S:D614G,S:P681H,S:T716I,S:S982A,S:D1118H                    | 6 | 0   |
| hCoV-19/Mexico/ZAC_IBT_IMSS_1483/2021      | EPI_ISL_2681190 | OL461686 | B.1.1.7 | GRY | 35 | 8282A,G28881A,G28882A,G28883C,C28977T<br>C241T,C913T,C1912T,C3037T,C3267T,A4855G,C5388A,C5986T,T6954C,T9167C,C11344T,T11485C,C14408T,C14676T,C15279T,T16176C,C22498T,A23063T,C23271A,A23403G,C23604A,C23709T,T24506G,G24914C,C26013T,C27972T,G28048T,A28111G,G28280C,A28281T,T28282A,G2881A,G28882A,G28883C,C28977T                                     | N:D3L:N:R203K,N:G204R,N:S235F,ORF1a:T1001,ORF1a:A1708D,ORF1a:I2230T,ORF1a:Y2968H,ORF1b:P314L,ORF8:Q27*7*,ORF8:R52I,ORF8:Y73C,S:N501Y,S:A570D,S:D614G,S:P681H,S:T716I,S:S982A,S:D1118H                                                                             | 6 | 132 |
| hCoV-19/Mexico/ZAC_INER_IMSS_1210/2021     | EPI_ISL_2835939 | OL461687 | B.1.1.7 | GRY | 36 | 8282A,G28881A,G28882A,G28883C,C28977T<br>C241T,C913T,C3037T,C3267T,G6362A,T6954C,C12970T,C13176T,C14408T,C14676T,C15279T,T16176C,G17427T,C17977T,A23063T,C23271A,A23403G,C23604A,C23709T,C24023T,C24054T,T24506G,G24914C,C27972T,G28048T,A28111G,G28209T,G28280C,A28281T,T28282A,G28881A,G28882A,G28883C,C28977T                                        | N:D3L:N:R203K,N:G204R,N:S235F,ORF1a:T1001,ORF1a:A1708D,ORF1a:A2033T,ORF1a:I2230T,ORF1a:T4304I,ORF1b:P314L,ORF1b:L1504F,ORF8:Q27*7*,ORF8:R52I,ORF8:Y73C,ORF8:E106*,S:N501Y,S:A570D,S:D614G,S:P681H,S:T716I,S:S982A,S:D1118H                                        | 6 | 0   |
| hCoV-19/Mexico/ZAC_INER_IMSS_1217/2021     | EPI_ISL_2835941 | OL461688 | B.1.1.7 | GRY | 35 | 8881A,G28882A,G28883C,C28977T<br>C241T,C913T,C3037T,C3267T,C5388A,C5986T,G6362A,T6954C,C12970T,C13176T,C14408T,C14676T,C15279T,T16176C,G17427T,C17977T,A23063T,C23271A,A23403G,C23604A,C23709T,C24023T,C24054T,T24506G,G24914C,C27972T,G28048T,A28111G,G28209T,G28280C,A28281T,T28282A,G28881A,G28882A,G28883C,C28977T                                  | N:D3L:N:R203K,N:G204R,N:S235F,ORF1a:T1001,ORF1a:A1708D,ORF1a:A2033T,ORF1a:I2230T,ORF1a:T4304I,ORF1b:P314L,ORF1b:L1504F,ORF8:Q27*7*,ORF8:R52I,ORF8:Y73C,ORF8:E106*,S:N501Y,S:A570D,S:D614G,S:P681H,S:T716I,S:S982A,S:D1118H                                        | 6 | 0   |
| hCoV-19/Mexico/ZAC_INER_IMSS_1225/2021     | EPI_ISL_2835942 | OL461689 | B.1.1.7 | GRY | 36 | 8282A,G28881A,G28882A,G28883C,C28977T<br>C241T,C913T,C2453T,C3037T,C3267T,G5023T,C5388A,C5986T,T6954C,C8836T,T9445C,C9611T,C14408T,C14676T,C15279T,T16176C,C16293T,G20102T,C21855T,G21974C,A23063T,C23271A,A23403G,C23604A,C23709T,T24506G,G24914C,C27972T,G28048T,A28111G,G28280C,A28281T,T28282A,G28881A,G28882A,G28883C,C28977T                      | N:D3L:N:R203K,N:G204R,N:S235F,ORF1a:L730F,ORF1a:T1001,ORF1a:M1586I,ORF1a:A1708D,ORF1a:I2230T,ORF1a:L3116F,ORF1b:P314L,ORF1b:S2212I,ORF3a:W131C,ORF8:Q27*7*,ORF8:R52I,ORF8:Y73C,S598F,S:D138H,S:N501Y,S:A570D,S:D614G,S:P681H,S:T716I,S:S982A,S:D1118H             | 6 | 0   |
| hCoV-19/Mexico/ZAC_INER_IMSS_1230/2021     | EPI_ISL_2490333 | OL461690 | B.1.1.7 | GRY | 39 | C241T,C913T,C3037T,C3267T,C5388A,C5986T,G6362A,T6954C,C12970T,C13176T,C14408T,C14676T,C15279T,T16176C,C17977T,A23063T,C23271A,A23403G,C23604A,C23709T,C24023T,C24054T,T24506G,G24914C,C27972T,G28048T,A28111G,G28280C,A28281T,T28282A,G28881A,G28882A,G28883C,C28977T                                                                                   | N:D3L:N:R203K,N:G204R,N:S235F,ORF1a:T1001,ORF1a:A1708D,ORF1a:A2033T,ORF1a:I2230T,ORF1a:T4304I,ORF1b:P314L,ORF1b:L1504F,ORF8:Q27*7*,ORF8:R52I,ORF8:Y73C,ORF8:E106*,S:N501Y,S:A570D,S:D614G,S:P681H,S:T716I,S:S982A,S:D1118H                                        | 6 | 0   |
| hCoV-19/Mexico/ZAC_INER_IMSS_1235/2021     | EPI_ISL_2835943 | OL461691 | B.1.1.7 | GRY | 35 | 8881A,G28882A,G28883C,C28977T<br>C241T,C913T,C2110T,C2841T,C3037T,C3267T,C5388A,C5986T,T6954C,G7042T,C12141A,C14120T,C14408T,C14676T,C15279T,T16176C,T17583G,A23063T,C23271A,A23403G,C23604A,C23709T,T24506G,G24914C,C25624T,C27972T,G28048T,A28111G,G28280C,A28281T,T28282A,C28531T,G28881A,G28882A,G28883C,C28977T                                    | N:D3L:N:R203K,N:G204R,N:S235F,ORF1a:A859V,ORF1a:T1001,ORF1a:A1708D,ORF1a:I2230T,ORF1a:M2259I,ORF1a:T3959N,ORF1b:P218L,ORF1b:P314L,ORF3a:H78Y,ORF8:Q27*7*,ORF8:R52I,ORF8:K68*,ORF8:Y73C,ORF9b:T83I,S:N501Y,S:A570D,S:D614G,S:P681H,S:T716I,S:S982A,S:D1118H        | 6 | 0   |
| hCoV-19/Mexico/ZAC_INER_IMSS_1237/2021     | EPI_ISL_2490348 | OL461692 | B.1.1.7 | GRY | 38 | 82A,C28531T,G28881A,G28882A,G28883C,C28977T,G29254T<br>C241T,C913T,C3037T,C3267T,C5388A,C5986T,G6362A,T6954C,A10323G,C12970T,C13176T,C14408T,C14676T,C15279T,T16176C,C17977T,A23063T,C23271A,A23403G,C23604A,C23709T,C24023T,C24054T,T24506G,G24914C,C27972T,G28048T,A28111G,G28280C,A28281T,T28282A,G28881A,G28882A,G28883C,C28977T                    | N:D3L:N:R203K,N:G204R,N:S235F,ORF1a:T1001,ORF1a:A1708D,ORF1a:A2033T,ORF1a:I2230T,ORF1a:T4304I,ORF1b:P314L,ORF1b:L1504F,ORF8:Q27*7*,ORF8:R52I,ORF8:Y73C,ORF8:E106*,S:N501Y,S:A570D,S:D614G,S:P681H,S:T716I,S:S982A,S:D1118H                                        | 6 | 0   |
| hCoV-19/Mexico/ZAC_INER_IMSS_1244/2021     | EPI_ISL_2835945 | OL461693 | B.1.1.7 | GRY | 36 | 8282A,G28881A,G28882A,G28883C,C28977T<br>C241T,C913T,A2410G,C3037T,C3267T,C3777T,C4084T,C5388A,C5986T,G6362A,T6954C,C12970T,C13176T,C14408T,C14676T,C15279T,T16176C,A21367T,A23063T,C23271A,A23403G,C23604A,C23709T,C24023T,C24054T,T24506G,G24914C,C27972T,G28048T,A28111G,G28280C,A28281T,T28282A,G28881A,G28882A,G28883C,C28977T                     | N:D3L:N:R203K,N:G204R,N:S235F,ORF1a:T1001,ORF1a:T1171I,ORF1a:A1708D,ORF1a:A2033T,ORF1a:I2230T,ORF1a:T4304I,ORF1b:P314L,ORF1b:I2634F,ORF8:Q27*7*,ORF8:R52I,ORF8:Y73C,S:N501Y,S:A570D,S:D614G,S:P681H,S:T716I,S:S982A,S:D1118H                                      | 6 | 1   |
| hCoV-19/Mexico/ZAC_LANGEBIO_IMSS_0301/2021 | EPI_ISL_1662226 | OL461694 | B.1.1.7 | GRY | 37 | 1T,T28282A,G28881A,G28882A,G28883C,C28977T<br>C241T,A773G,C913T,C3037T,C3267T,C3777T,C4084T,C5388A,C5986T,G6362A,T6954C,C12970T,C13176T,C14408T,C14676T,C15279T,T16176C,G22627A,A23063T,C23271A,A23403G,C23604A,C23709T,C24023T,C24054T,T24506G,G24914C,C27972T,G28048T,A28111G,G28280C,A28281T,T28282A,G28881A,G28882A,G28883C,C28977T                 | N:D3L:N:R203K,N:G204R,N:S235F,ORF1a:T170A,ORF1a:T1001,ORF1a:T1171I,ORF1a:A1708D,ORF1a:A2033T,ORF1a:I2230T,ORF1a:T4304I,ORF1b:P314L,ORF1b:Q27*7*,ORF8:R52I,ORF8:Y73C,S:N501Y,S:A570D,S:D614G,S:P681H,S:T716I,S:S982A,S:D1118H                                      | 6 | 1   |
| hCoV-19/Mexico/ZAC_LANGEBIO_IMSS_0305/2021 | EPI_ISL_1662230 | OL461695 | B.1.1.7 | GRY | 37 | T28282A,G28881A,G28882A,G28883C,C28977T<br>C241T,C913T,C3037T,C3267T,G5164T,C5388A,C5986T,T6954C,G14055T,C14408T,C14676T,C15279T,T16176C,A23063T,C23271A,A23403G,C23604A,C23709T,T24506G,G24914C,T27384C,T2792T,G28048T,A28111G,G28280C,A28281T,T28282A,G28881A,G28882A,G28883C,C28977T                                                                 | N:D3L:N:R203K,N:G204R,N:S235F,ORF1a:T1001,ORF1a:E1633D,ORF1a:A1708D,ORF1a:I2230T,ORF1b:P314L,ORF8:Q27*7*,ORF8:R52I,ORF8:Y73C,S:N501Y,S:A570D,S:D614G,S:P681H,S:T716I,S:S982A,S:D1118H                                                                             | 6 | 1   |
| hCoV-19/Mexico/ZAC_LANGEBIO_IMSS_0704/2021 | EPI_ISL_2402118 | OL461696 | B.1.1.7 | GRY | 31 | 7972T,G28048T,A28111G,G28280C,A28281T,T28282A,G28881A,G28882A,G28883C,C28977T<br>C241T,C913T,C3037T,C3267T,C5388A,C5986T,T6954C,C12141A,C12754T,C14120T,C14408T,C14676T,C15279T,T16176C,T17583G,A23063T,C23271A,A23403G,C23604A,C23709T,T24506G,G24914C,C25624T,C27972T,G28048T,A28111G,G28280C,A28281T,T28282A,C28531T,G28881A,G28882A,G28883C,C28977T | N:D3L:N:R203K,N:G204R,N:S235F,ORF1a:T1001,ORF1a:A1708D,ORF1a:I2230T,ORF1a:T3959N,ORF1b:P218L,ORF1b:P314L,ORF3a:H78Y,ORF8:Q27*7*,ORF8:R52I,ORF8:K68*,ORF8:Y73C,ORF9b:T83I,S:N501Y,S:A570D,S:D614G,S:P681H,S:T716I,S:S982A,S:D1118H                                 | 6 | 953 |
| hCoV-19/Mexico/ZAC-IBT_IMSS_11154-NC/2021  | EPI_ISL_2801703 | OL461697 | B.1.1.7 | GRY | 35 | G28881A,G28882A,G28883C,C28977T<br>C222T,C241T,C913T,C3037T,C3267T,C5388A,C5986T,T6954C,G7042T,C8127T,C14120T,C14408T,C14676T,C15279T,T16176C,C17762T,A23063T,C23271A,A23403G,C23604A,C23709T,T24506G,G24914C,T25180C,C25782T,G26109T,C28960T,G28048T,A28111G,G28280C,A28281T,T28282A,G28881A,G28882A,G28883C,C28977T                                   | N:D3L:N:R203K,N:G204R,N:S235F,ORF1a:T1001,ORF1a:A1708D,ORF1a:I2230T,ORF1a:M2259I,ORF1a:A2621V,ORF1b:P218L,ORF1b:P314L,ORF1b:A1432V,ORF3a:E239D,ORF8:Q27*7*,ORF8:R52I,ORF8:K68*,ORF8:Y73C,S:N501Y,S:A570D,S:D614G,S:P681H,S:T716I,S:S982A,S:D1118H                 | 6 | 479 |
| hCoV-19/Mexico/ZAC-IBT_IMSS_1821/2021      | EPI_ISL_2801697 | OL461698 | B.1.1.7 | GRY | 24 | S.D614G,S:P681H,S:T716I,S:S982A,S:D1118H<br>C241T,T597C,C913T,C1471T,G2144A,C2453T,C3037T,C3267T,C5388A,C5986T,T6954C,C2826T,C9611T,A12547G,C14408T,C14676T,C15279T,T16176C,G18651T,C21855T,A23063T,C23271A,A23403G,C23604A,C23709T,T24506G,G24914C,C27972T,G28048T,A28111G,G28280C,A28281T,T28282A,A28295G,G28881A,G28882A,G28883C,C28977T             | N:D3L:N:R203K,N:G204R,N:S235F,ORF1a:T1001,ORF1a:A1708D,ORF1a:I2230T,ORF1a:L3116F,ORF1b:P314L,ORF1b:E1728D,ORF8:Q27*7*,ORF8:R52I,ORF8:Y73C,S598F,S:D1118H                                                                                                          | 6 | 0   |
| hCoV-19/Mexico/ZAC-IBT_IMSS_1826/2021      | EPI_ISL_2801701 | OL461699 | B.1.1.7 | GRY | 38 | 2828A,A28295G,G28881A,G28882A,G28883C,C28977T<br>C241T,C913T,C2110T,C3037T,C3267T,C5388A,C5986T,T6954C,G7042T,C12141A,C14120T,G14181A,C14408T,C14676T,C15279T,T16176C,T17583G,G17658T,G22103T,G22104T,A23063T,C23271A,A23403G,C23604A,C23709T,T24506G,G24914C,C25624T,C27972T,G28048T,A28111G,G28280C,A28281T,T28282A,G28881A,G28882A,G28883C,C28977T   | N:D3L:N:R203K,N:G204R,N:S235F,ORF1a:T1001,ORF1a:A1708D,ORF1a:I2230T,ORF1a:M2259I,ORF1a:T3959N,ORF1b:P218L,ORF1b:P314L,ORF1b:M1397I,ORF3a:H78Y,ORF8:Q27*7*,ORF8:R52I,ORF8:K68*,ORF8:Y73C,ORF9b:T83I,S:G181S,N501Y,S:A570D,S:D614G,S:P681H,S:T716I,S:S982A,S:D1118H | 6 | 0   |
| hCoV-19/Mexico/ZAC-IBT_IMSS_1827/2021      | EPI_ISL_2801702 | OL461700 | B.1.1.7 | GRY | 40 | C241T,C913T,C2453T,C3037T,C3267T,C5388A,C5986T,T6954C,C9611T,C10029T,C10714T,C14408T,C14676T,C15279T,T16176C,C21855T,G21974C,A23063T,C23271A,A23403G,C23604A,C23709T,T24506G,G24914C,C27972T,G28048T,A28111G,G28280C,A28281T,T28282A,A28295G,G28881A,G28882A,G28883C,C28977T                                                                            | N:D3L:N:R203K,N:G204R,N:S235F,ORF1a:T1001,ORF1a:A1708D,ORF1a:I2230T,ORF1a:L3116F,ORF1a:L3210F,ORF1a:T235I,ORF1b:P314L,ORF8:Q27*7*,ORF8:R52I,ORF8:Y73C,S598F,S:D138H,S:N501Y,S:A570D,S:D614G,S:P681H,S:T716I,S:S982A,S:D1118H                                      | 6 | 0   |
| hCoV-19/Mexico/ZAC-IBT_IMSS_1831/2021      | EPI_ISL_2801706 | OL461701 | B.1.1.7 | GRY | 37 | 95G,G28881A,G28882A,G28883C,C28977T,G28960T,C28977T<br>C913T,C2110T,C3037T,C3267T,C3294A,C5388A,C5986T,T6954C,C12141A,C14120T,C14408T,C14676T,C15279T,T16176C,T17583G,A23063T,C23271A,A23403G,C23604A,C23709T,T24506G,G24914C,C25624T,C27972T,G28048T,A28111G,G28280C,A28281T,T28282A,C28531T,G28881A,G28882A,G28883C,C28977T,C29007G,G29254T           | N:D3L:N:R203K,N:G204R,N:S235F,ORF1a:T1001,ORF1a:A1708D,ORF1a:I2230T,ORF1a:T3959N,ORF1b:P218L,ORF1b:P314L,ORF1b:H78Y,ORF8:Q27*7*,ORF8:R52I,ORF8:K68*,ORF8:Y73C,ORF9b:T83I,S:N501Y,S:A570D,S:D614G,S:P681H,S:T716I,S:S982A,S:D1118H                                 | 6 | 662 |
| hCoV-19/Mexico/ZAC-LANGEBIO_IMSS_0977/2021 | EPI_ISL_2671760 | OL461702 | B.1.1.7 | GRY | 37 | G28881A,G28882A,G28883C,C28977T,C29007G,G29254T<br>C241T,C913T,C2453T,C3037T,C3267T,C5388A,C5986T,T6954C,C9611T,C10029T,C10714T,C14408T,C14676T,C15279T,T16176C,C21855T,G21974C,A23063T,C23271A,A23403G,C23604A,C23709T,T24506G,G24914C,C25624T,C27972T,G28048T,A28111G,G28280C,A28281T,T28282A,C28531T,G28881A,G28882A,G28883C,C28977T                 | N:D3L:N:R203K,N:G204R,N:S235F,ORF1a:T1001,ORF1a:A1708D,ORF1a:I2230T,ORF1a:L3116F,ORF1a:L3210F,ORF1a:T235I,ORF1b:P314L,ORF8:Q27*7*,ORF8:R52I,ORF8:Y73C,S598F,S:D138H,S:N501Y,S:A570D,S:D614G,S:P681H,S:T716I,S:S982A,S:D1118H                                      | 6 | 28  |

|                                             |                 |         |     |    |                                                                                                                                                                                                                                                                                                                                                                                                                                                                                                                                                                                                                                                                                                                        |                                                                                                                                                                                                                                                                      |   |    |
|---------------------------------------------|-----------------|---------|-----|----|------------------------------------------------------------------------------------------------------------------------------------------------------------------------------------------------------------------------------------------------------------------------------------------------------------------------------------------------------------------------------------------------------------------------------------------------------------------------------------------------------------------------------------------------------------------------------------------------------------------------------------------------------------------------------------------------------------------------|----------------------------------------------------------------------------------------------------------------------------------------------------------------------------------------------------------------------------------------------------------------------|---|----|
| hCoV-19/Mexico/ZAC-INNER-IMSS-00023/2021    | EPI_ISL_1287761 | B.1.1.7 | GRY | 35 | C241T,C913T,C3037T,C3267T,C5388A,C5986T,G6362A,T6954C,C12970T,C13176T,C14408T,C14676T,C15279T,T16176C,C17977T,A20013G,A23063T,C23271A,A23403G,C23604A,C23709T,C24023T,C24054T,T24506G,G24914C,C27972T,G28048T,A28111G,G28280C,A28281T,T28282A,G2881A,G28882A,G28883C,C28977T                                                                                                                                                                                                                                                                                                                                                                                                                                           | N:D3L,N:R203K,N:G204R,N:S235F,ORF1a:T1001,ORF1a:A1708D,ORF1a:A2033T,ORF1a:I2230T,ORF1a:T4304I,ORF1b:P314L,ORF1b:L1504F,ORF8:Q27*,ORF8:R52I,ORF8:Y73C,S:N501Y,S:A570D,S:D614G,S:P681H,S:T716I,S:A831V,S:S982A,S:D1118H                                                | 6 | 0  |
| hCoV-19/Mexico/ZAC-INNER-IMSS-00026/2021    | EPI_ISL_1279265 | B.1.1.7 | GRY | 35 | C241T,C913T,C3037T,C3267T,C5388A,C5986T,G6362A,T6954C,C12970T,C13176T,C14408T,C14676T,C15279T,T16176C,C17977T,A20013G,A23063T,C23271A,A23403G,C23604A,C23709T,C24023T,C24054T,T24506G,G24914C,C27972T,G28048T,A28111G,G28280C,A28281T,T28282A,G2881A,G28882A,G28883C,C28977T                                                                                                                                                                                                                                                                                                                                                                                                                                           | N:D3L,N:R203K,N:G204R,N:S235F,ORF1a:T1001,ORF1a:A1708D,ORF1a:A2033T,ORF1a:I2230T,ORF1a:T4304I,ORF1b:P314L,ORF1b:L1504F,ORF8:Q27*,ORF8:R52I,ORF8:Y73C,S:N501Y,S:A570D,S:D614G,S:P681H,S:T716I,S:A831V,S:S982A,S:D1118H                                                | 6 | 0  |
| hCoV-19/Mexico/ZAC-INNER-IMSS-00050/2021    | EPI_ISL_1287762 | B.1.1.7 | GRY | 35 | C241T,C913T,C3037T,C3267T,C5388A,C5986T,G6362A,T6954C,C12970T,C13176T,C14408T,C14676T,C15279T,T16176C,C17977T,A20013G,A23063T,C23271A,A23403G,C23604A,C23709T,C24023T,C24054T,T24506G,G24914C,C27972T,G28048T,A28111G,G28280C,A28281T,T28282A,G2881A,G28882A,G28883C,C28977T                                                                                                                                                                                                                                                                                                                                                                                                                                           | N:D3L,N:R203K,N:G204R,N:S235F,ORF1a:F31L,ORF1a:T1001,ORF1a:A1708D,ORF1a:A2033T,ORF1a:I2230T,ORF1a:T4304I,ORF1b:P314L,ORF1b:L1504F,ORF8:Q27*,ORF8:R52I,ORF8:Y73C,S:N501Y,S:A570D,S:D614G,S:P681H,S:T716I,S:A831V,S:S982A,S:D1118H                                     | 6 | 0  |
| hCoV-19/Mexico/ZAC-INNER-IMSS-00059/2021    | EPI_ISL_1287763 | B.1.1.7 | GRY | 36 | 82A,G28881A,G28882A,G28883C,C28977T                                                                                                                                                                                                                                                                                                                                                                                                                                                                                                                                                                                                                                                                                    | N:D3L,N:R203K,N:G204R,N:S235F,ORF1a:T1001,ORF1a:D1625E,ORF1a:P1927L,ORF1a:T4304I,ORF1b:P314L,ORF1b:L1504F,ORF8:Q27*,ORF8:R52I,ORF8:Y73C,S:N501Y,S:A570D,S:D614G,S:P681H,S:T716I,S:A831V,S:S982A,S:D1118H                                                             | 6 | 0  |
| hCoV-19/Mexico/ZAC-INNER-IMSS-00078/2021    | EPI_ISL_1287764 | B.1.1.7 | GRY | 35 | C241T,C913T,C3037T,C3267T,C5388A,C5986T,G6362A,T6954C,C12970T,C13176T,C14408T,C14676T,C15279T,T16176C,C17977T,A20013G,A23063T,C23271A,A23403G,C23604A,C23709T,C24023T,C24054T,T24506G,G24914C,C27972T,G28048T,A28111G,G28280C,A28281T,T28282A,G2881A,G28882A,G28883C,C28977T                                                                                                                                                                                                                                                                                                                                                                                                                                           | N:D3L,N:R203K,N:G204R,N:S235F,ORF1a:T1001,ORF1a:A1708D,ORF1a:A2033T,ORF1a:I2230T,ORF1a:T4304I,ORF1b:P314L,ORF1b:L1504F,ORF8:Q27*,ORF8:R52I,ORF8:Y73C,S:N501Y,S:A570D,S:D614G,S:P681H,S:T716I,S:A831V,S:S982A,S:D1118H                                                | 6 | 0  |
| hCoV-19/Mexico/ZAC-INNER-IMSS-00079/2021    | EPI_ISL_1287765 | B.1.1.7 | GRY | 35 | C241T,C913T,C3037T,C3267T,C5388A,C5986T,G6362A,T6954C,C12970T,C13176T,C14408T,C14676T,C15279T,T16176C,C17977T,A20013G,A23063T,C23271A,A23403G,C23604A,C23709T,C24023T,C24054T,T24506G,G24914C,C27972T,G28048T,A28111G,G28280C,A28281T,T28282A,G2881A,G28882A,G28883C,C28977T                                                                                                                                                                                                                                                                                                                                                                                                                                           | N:D3L,N:R203K,N:G204R,N:S235F,ORF1a:T1001,ORF1a:A1708D,ORF1a:A2033T,ORF1a:I2230T,ORF1a:T4304I,ORF1b:P314L,ORF1b:L1504F,ORF8:Q27*,ORF8:R52I,ORF8:Y73C,S:N501Y,S:A570D,S:D614G,S:P681H,S:T716I,S:A831V,S:S982A,S:D1118H                                                | 6 | 0  |
| hCoV-19/Mexico/ZAC-INNER-IMSS-00086/2021    | EPI_ISL_1287767 | B.1.1.7 | GRY | 34 | 054T,T24506G,G24914C,C27972T,G28048T,A28111G,G28280C,A28281T,T28282A,G2881A,G28882A,G28883C,C28977T                                                                                                                                                                                                                                                                                                                                                                                                                                                                                                                                                                                                                    | N:D3L,N:R203K,N:G204R,N:S235F,ORF1a:T1001,ORF1a:A1708D,ORF1a:A2033T,ORF1a:I2230T,ORF1a:T4304I,ORF1b:P314L,ORF1b:L1504F,ORF8:Q27*,ORF8:R52I,ORF8:Y73C,S:N501Y,S:A570D,S:D614G,S:P681H,S:T716I,S:A831V,S:S982A,S:D1118H                                                | 6 | 0  |
| hCoV-19/Mexico/BCN-CICESE-M1409/2021        | EPI_ISL_2455241 | Q.3     | GRY | 39 | 11G,G28280C,A28281T,T28282A,G2881A,G28882A,G28883C,C28977T                                                                                                                                                                                                                                                                                                                                                                                                                                                                                                                                                                                                                                                             | M:V70L,N:D3L,N:R203K,N:G204R,N:S235F,ORF1a:T1001,ORF1a:M1586I,ORF1a:P1708D,ORF1a:I2230T,ORF1b:P314L,ORF1b:L1383R,ORF1b:L2499D,ORF1b:P2405,ORF8:Q27*,ORF8:R52I,ORF8:Y73C,S:D178H,S:N501Y,S:A570D,S:D614G,S:P681H,S:T716I,S:S982A,S:D1118H                             | 6 | 0  |
| hCoV-19/Mexico/BCN-CICESE-M1411/2021        | EPI_ISL_2455242 | Q.3     | GRY | 38 | 28280C,A28281T,T28282A,G2881A,G28882A,G28883C,C28977T                                                                                                                                                                                                                                                                                                                                                                                                                                                                                                                                                                                                                                                                  | 46G,S:P681H,S:T716I,S:S982A,S:D1118H                                                                                                                                                                                                                                 | 6 | 15 |
| hCoV-19/Mexico/BCN-InDRE_FB13738_S1741/2021 | EPI_ISL_2101880 | B.1.1.7 | GRY | 43 | 792T,G28048T,A28111G,G28280C,A28281T,T28282A,G2881A,G28882A,G28883C,C28977T                                                                                                                                                                                                                                                                                                                                                                                                                                                                                                                                                                                                                                            | N:D3L,N:R203K,N:G204R,N:S235F,ORF1a:T1001,ORF1a:A1708D,ORF1a:A2033T,ORF1a:I2230T,ORF1a:T4304I,ORF1b:P314L,ORF1b:L1504F,ORF8:Q27*,ORF8:R52I,ORF8:Y73C,S:N501Y,S:A570D,S:D614G,S:P681H,S:T716I,S:A831V,S:S982A,S:D1118H                                                | 6 | 0  |
| hCoV-19/Mexico/BCN-InDRE_FB16371_S2477/2021 | EPI_ISL_2455998 | B.1.1.7 | GRY | 44 | 04T,G24914C,C27972T,G28048T,A28111G,G28280C,A28281T,T28282A,G2881A,G28882A,G28883C,C28977T                                                                                                                                                                                                                                                                                                                                                                                                                                                                                                                                                                                                                             | N:D3L,N:R203K,N:G204R,N:S235F,ORF1a:K669N,ORF1a:T1001,ORF1a:A1283V,ORF1a:A1708D,ORF1a:I2230T,ORF1b:P314L,ORF1b:L1383R,ORF1b:L1555D,ORF1b:S1089L,ORF1b:P1975S,ORF8:Q27*,ORF8:R52I,ORF8:Y73C,S:D178H,S:N501Y,S:A570D,S:D614G,S:P681H,S:T716I,S:S982A,S:D1118H,S:E1258D | 6 | 0  |
| hCoV-19/Mexico/BCN-InDRE_FB16375_S2478/2021 | EPI_ISL_2455999 | B.1.1.7 | GRY | 41 | 28048T,A28111G,G28280C,A28281T,T28282A,G2881A,G28882A,G28883C,C28977T                                                                                                                                                                                                                                                                                                                                                                                                                                                                                                                                                                                                                                                  | N:D3L,N:R203K,N:G204R,N:S235F,ORF1a:K669N,ORF1a:T1001,ORF1a:A1283V,ORF1a:A1708D,ORF1a:I2230T,ORF1b:P314L,ORF1b:L1383R,ORF1b:L1555D,ORF1b:S1089L,ORF1b:P1975S,ORF8:Q27*,ORF8:R52I,ORF8:Y73C,S:D178H,S:N501Y,S:A570D,S:D614G,S:P681H,S:T716I,S:S982A,S:D1118H,S:E1258D | 6 | 0  |
| hCoV-19/Mexico/BCN-InDRE_FB16376_S2479/2021 | EPI_ISL_2456000 | Q.3     | GRY | 40 | 8048T,A28111G,G28280C,A28281T,T28282A,G2881A,G28882A,G28883C,C28977T                                                                                                                                                                                                                                                                                                                                                                                                                                                                                                                                                                                                                                                   | N:D3L,N:R203K,N:G204R,N:S235F,ORF1a:K669N,ORF1a:T1001,ORF1a:A1283V,ORF1a:A1708D,ORF1a:I2230T,ORF1b:P314L,ORF1b:L1383R,ORF1b:L1555D,ORF1b:S1089L,ORF1b:P1975S,ORF8:Q27*,ORF8:R52I,ORF8:Y73C,S:D178H,S:N501Y,S:A570D,S:D614G,S:P681H,S:T716I,S:S982A,S:D1118H,S:E1258D | 6 | 0  |
| hCoV-19/Mexico/BCN-InDRE_FB17815_S4114/2021 | EPI_ISL_2920685 | B.1.1.7 | GRY | 49 | 4914C,C26882T,C27972T,G28048T,A28111G,G28280C,A28281T,T28282A,G2881A,G28882A,C241T,C841T,C913T,C3037T,C3267T,A4501C,C5388A,C5986T,A6366G,T6954C,C14408T,C14676T,T15096C,C15279T,T16176C,T19541C,C22993A,A23063T,C23271A,A23403G,C23604A,C23709T,T24506G,C24789T,G24914C,T25027A,C25336C,G25855T,G26428C,C27418T,C27972T,G28048T,A28111G,G28280C,A28281T,T28282A,C28606T,G2881A,G28882A,G28883C,G28884C,C28241T,C835T,C913T,A15586G,C2110T,G2272T,G2782T,C3037T,C3267T,C4113T,C4456T,C5388A,C5806T,C5986T,T6954C,G11312A,C14120T,C14408T,C14676T,C15279T,T16176C,C16608T,C16733T,C19390T,G22094T,A23063T,C23271A,A23403G,C23604A,C23709T,T24506G,C24904T,G24914C,G28280C,A28281T,T28282A,G2881A,G28882A,G28883C,C28977T | N:D3L,N:R203K,N:G204R,N:S235F,ORF1a:K669N,ORF1a:T1001,ORF1a:A1283V,ORF1a:A1708D,ORF1a:I2230T,ORF1b:P314L,ORF1b:L1383R,ORF1b:L1555D,ORF1b:S1089L,ORF1b:P1975S,ORF8:Q27*,ORF8:R52I,ORF8:Y73C,S:D178H,S:N501Y,S:A570D,S:D614G,S:P681H,S:T716I,S:S982A,S:D1118H,S:E1258D | 6 | 0  |
| hCoV-19/Mexico/BCN-InDRE_FB18286_S3966/2021 | EPI_ISL_2858980 | B.1.1.7 | GRY | 26 | 8T,A28111G,G28280C,A28281T,T28282A,C28606T,G2881A,G28882A,G28883C,G28884C,C28241T,C835T,C913T,A15586G,C2110T,G2272T,G2782T,C3037T,C3267T,C4113T,C4456T,C5388A,C5806T,C5986T,T6954C,G11312A,C14120T,C14408T,C14676T,C15279T,T16176C,C16608T,C16733T,C19390T,G22094T,A23063T,C23271A,A23403G,C23604A,C23709T,T24506G,C24904T,G24914C,G28280C,A28281T,T28282A,G2881A,G28882A,G28883C,C28977T                                                                                                                                                                                                                                                                                                                              | N:D3L,N:R203K,N:G204R,N:S235F,ORF1a:K669N,ORF1a:T1001,ORF1a:A1283V,ORF1a:A1708D,ORF1a:I2230T,ORF1b:P314L,ORF1b:L1383R,ORF1b:L1555D,ORF1b:S1089L,ORF1b:P1975S,ORF8:Q27*,ORF8:R52I,ORF8:Y73C,S:D178H,S:N501Y,S:A570D,S:D614G,S:P681H,S:T716I,S:S982A,S:D1118H,S:E1258D | 6 | 0  |
| hCoV-19/Mexico/BCS-InDRE_FB17119_S3086/2021 | EPI_ISL_2663353 | B.1.1.7 | GRY | 44 | 4914C,C27972T,G28048T,A28095T,A28111G,G28280C,A28281T,T28282A,G2881A,G28882A,C241T,C913T,C3037T,C3267T,C5388A,C5986T,T6954C,C14408T,C14676T,C15279T,T16176C,G2427T,A23063T,C23271A,A23403G,C23604A,C23709T,T24506G,G24914C,G25690T,C27972T,G28048T,A28111G,G28280C,A28352G,G28396T,G2881A,G28882A,G28883C,C28977T                                                                                                                                                                                                                                                                                                                                                                                                      | N:D3L,N:R203K,N:G204R,N:S235F,ORF1a:T1001,ORF1a:A1708D,ORF1a:A2033T,ORF1a:I2230T,ORF1a:T4304I,ORF1b:P314L,ORF1b:L1504F,ORF8:Q27*,ORF8:R52I,ORF8:Y73C,S:N501Y,S:A570D,S:D614G,S:P681H,S:T716I,S:A831V,S:S982A,S:D1118H                                                | 6 | 0  |
| hCoV-19/Mexico/BCS-InDRE_FB19249_S4501/2021 | EPI_ISL_3033355 | B.1.1.7 | GRY | 25 | 82A,G28881A,G28882A,G28883C,C28977T,G29260T,G29540T                                                                                                                                                                                                                                                                                                                                                                                                                                                                                                                                                                                                                                                                    | M:A104V,N:D3L,N:R203K,N:G204R,N:S235F,ORF1a:T1001,ORF1a:A1708D,ORF1a:I2230T,ORF1a:K2511N,ORF1a:T2825I,ORF1b:P314L,ORF1b:Q2070H,ORF8:Q27*,ORF8:R52I,ORF8:Y73C,S:N501Y,S:A570D,S:D614G,S:P681H,S:T716I,S:S982A,S:D1118H                                                | 6 | 0  |
| hCoV-19/Mexico/BCS-InDRE_FB19255_S4502/2021 | EPI_ISL_3033356 | B.1.1.7 | GRY | 37 | G28881A,G28882A,G28883C,C28977T,C29614T                                                                                                                                                                                                                                                                                                                                                                                                                                                                                                                                                                                                                                                                                | 28A,S:D1118H                                                                                                                                                                                                                                                         | 6 | 0  |













|                                             |                 |         |     |    |                                                                                                                                                                                                                                                                                                                                                              |  |  |                                                                                                                                                                                                                                                                                                     |                                                                         |     |
|---------------------------------------------|-----------------|---------|-----|----|--------------------------------------------------------------------------------------------------------------------------------------------------------------------------------------------------------------------------------------------------------------------------------------------------------------------------------------------------------------|--|--|-----------------------------------------------------------------------------------------------------------------------------------------------------------------------------------------------------------------------------------------------------------------------------------------------------|-------------------------------------------------------------------------|-----|
|                                             |                 |         |     |    | C241T,C913T,C3037T,C3267T,C3966T,C4206T,C5388A,C5986T,T6954C,A12162G,C14408T,C14676T,C15279T,G15594T,C15720T,T16176C,A17615G,G18498T,A21137G,A23063T,G23270T,C23271A,A23403G,C23604A,C23709T,T24506G,G24914C,G25336C,G25337C,G27972T,G28048T,A28111G,G28280C,A28281T,T28048T,G28079T,A28111G,G28280C,A28281T,T28282A,G28881A,G28882A,G28883C,C28977T,G29227T |  |  | N:D3L,N:R203K,N:G204R,N:S235F,ORF1a:T1001,ORF1a:A1234V,ORF1a:A1314V,ORF1a:A1708D,ORF1a:I2230T,ORF1a:Q3966G,ORF1b:P314L,ORF1b:K709N,ORF1b:K1383R,ORF1b:M1677,ORF1b:K2557R,ORF1b:P240S,ORF1b:A210V,ORF1b:Q27*,ORF1b:R52I,ORF1b:Y73C,S:N501Y,S:A570D,S:D614G,S:P681H,S:T716I,S:5982A,S:D1118H,S:E1258D | 6                                                                       | 0   |
| hCoV-19/Mexico/CMX-InDRE_FB16175_S2435/2021 | EPI_ISL_2455959 | B.1.1.7 | GRY | 42 | C241T,C913T,C2110T,C3037T,C3267T,C5388A,C5986T,T6954C,G7042T,A10195G,C10279T,C14120T,C14408T,C14676T,C15279T,T16176C,C21588T,A23063T,C23271A,A23403G,C23604A,C23709T,T24506G,G24914C,G25336C,G25337C,G27972T,G28048T,A28111G,G28280C,A28281T,T28048T,G28881A,G28882A,G28883C,C28977T                                                                         |  |  | 28                                                                                                                                                                                                                                                                                                  |                                                                         |     |
| hCoV-19/Mexico/CMX-InDRE_FB16521_S3061/2021 | EPI_ISL_2663328 | B.1.1.7 | GRY | 36 | C241T,C913T,C2110T,C3037T,C3267T,G3482A,G3728T,C5388A,C5986T,T6954C,T7984C,C14120T,C14408T,C14676T,C15279T,T16176C,C19390T,G21600T,A23063T,C23271A,A23403G,C23604A,C23709T,T24506G,G24914C,A25336C,G25337C,C27972T,G28048T,A28111G,G28280C,A28281T,T28048T,G28881A,G28882A,G28883C,C28977T                                                                   |  |  | 22                                                                                                                                                                                                                                                                                                  | 118H                                                                    | 75  |
| hCoV-19/Mexico/CMX-InDRE_FB16522_S3062/2021 | EPI_ISL_2663329 | B.1.1.7 | GRY | 37 | C241T,C913T,C2110T,C3037T,C3267T,G3482A,G3728T,C5388A,C5986T,T6954C,T7984C,C14120T,C14408T,C14676T,C15279T,T16176C,C19390T,G21600T,A23063T,C23271A,A23403G,C23604A,C23709T,T24506G,G24914C,A25336C,G25337C,C27972T,G28048T,A28111G,G28280C,A28281T,T28048T,G28881A,G28882A,G28883C,C28977T                                                                   |  |  | 25                                                                                                                                                                                                                                                                                                  | S:T716I,S:5982A,S:D1118H,S:E1258D,S:D1259H                              | 0   |
| hCoV-19/Mexico/CMX-InDRE_FB16523_S3063/2021 | EPI_ISL_2663330 | B.1.1.7 | GRY | 37 | C241T,C913T,C2110T,C3037T,C3267T,G3482A,G3728T,C5388A,C5986T,T6954C,T7984C,C14120T,C14408T,C14676T,C15279T,T16176C,C19390T,G21600T,A23063T,C23271A,A23403G,C23604A,C23709T,T24506G,G24914C,A25336C,G25337C,C27972T,G28048T,A28111G,G28280C,A28281T,T28048T,G28881A,G28882A,G28883C,C28977T                                                                   |  |  | 25                                                                                                                                                                                                                                                                                                  | S:T716I,S:5982A,S:D1118H,S:E1258D,S:D1259H                              | 0   |
| hCoV-19/Mexico/CMX-InDRE_FB16969_S3126/2021 | EPI_ISL_2663393 | B.1.1.7 | GRY | 38 | C241T,C913T,C3037T,C3267T,C5388A,C5986T,T6954C,G7272A,C10525T,C11572T,C12933T,C14408T,C14676T,C15279T,T16176C,A21466G,C21843T,T2441A,A23063T,C23271A,A23403G,C23604A,C23709T,T24506G,G24914C,G25336C,G25337C,G27972T,G28048T,A28111G,G28280C,A28281T,T28048T,G28881A,G28882A,G28883C,C28977T,C29272T,C29784T                                                 |  |  | 23                                                                                                                                                                                                                                                                                                  | S:T716I,S:5982A,S:D1118H                                                | 0   |
| hCoV-19/Mexico/CMX-InDRE_FB17954_S3934/2021 | EPI_ISL_2858948 | B.1.1.7 | GRY | 42 | C241T,C913T,C3037T,C3267T,C5388A,C5986T,G6647A,G6936T,T6954C,C14408T,C14621T,C14676T,T15096C,C15279T,T16176C,C17676T,C18183T,C19524T,A21519C,A23063T,C23271A,A23403G,C23604A,C23709T,A24070T,A24092G,T24506G,G24914C,A25020G,C25624T,C27737T,C27972T,G28048T,A28111G,G28280C,A28281T,T28282A,G28881A,G28882A,G28883C,C28977T                                 |  |  | 27                                                                                                                                                                                                                                                                                                  | S:D614G,S:P681H,S:T716I,S:Q836H,S:844Y,S:5982A,S:D1118H,S:D1153G        | 142 |
| hCoV-19/Mexico/CMX-InDRE_FB17958_S3935/2021 | EPI_ISL_2858949 | B.1.1.7 | GRY | 37 | C241T,C913T,C3037T,C3267T,C5388A,C5986T,T6954C,G7042T,C9803T,C14120T,C14408T,C14676T,C15279T,T16176C,A23063T,C23271A,A23403G,C23604A,C23709T,T24506G,G24914C,A25659G,C26110T,C27972T,G28048T,A28111G,G28280C,A28281T,T28282A,G28881A,G28882A,G28883C,C28977T                                                                                                 |  |  | 23                                                                                                                                                                                                                                                                                                  | S:T716I,S:5982A,S:D1118H                                                | 0   |
| hCoV-19/Mexico/CMX-InDRE_FB17960_S3936/2021 | EPI_ISL_2858950 | B.1.1.7 | GRY | 42 | C241T,C913T,C3037T,C3267T,C5388A,C5986T,G6647A,T6954C,A10486G,C14408T,C14676T,T15096C,C15279T,T16176C,C17676T,C18183T,C19524T,A21519C,G22217A,A23063T,C23271A,A23403G,C23604A,C23709T,A24070T,T24506G,G24914C,A25336C,C25624T,G26918T,T27384C,A27972T,G28048T,A28111G,G28280C,A28281T,T28282A,G28881A,G28882A,G28883C,C28977T                                |  |  | 24                                                                                                                                                                                                                                                                                                  | S:H5982A,S:D1118H,S:E1258D                                              | 0   |
| hCoV-19/Mexico/CMX-InDRE_FB17970_S3937/2021 | EPI_ISL_2858951 | B.1.1.7 | GRY | 39 | C241T,C913T,C3037T,C3267T,C5388A,C5986T,G6647A,C9611T,C14408T,C14676T,T15096C,C15279T,T16176C,C18183T,A21519C,A23063T,C23271A,A23403G,C23604A,C23709T,A24092G,T24506G,G24914C,A25336C,C25624T,C27737T,C27972T,G28048T,A28111G,G28280C,A28281T,T28282A,G28881A,G28882A,G28883C,C28977T                                                                        |  |  | 27                                                                                                                                                                                                                                                                                                  | S:D614G,S:P681H,S:T716I,S:Q836H,S:844Y,S:5982A,S:D1118H,S:E1258D        | 0   |
| hCoV-19/Mexico/CMX-InDRE_FB19386_S4507/2021 | EPI_ISL_3033361 | B.1.1.7 | GRY | 39 | OC,A28281T,T28282A,A28295G,G28881A,G28882A,G28883C,C28977T                                                                                                                                                                                                                                                                                                   |  |  | 27                                                                                                                                                                                                                                                                                                  | S:N501Y,S:A570D,S:D614G,S:P681H,S:T716I,S:5982A,S:D1118H                | 0   |
| hCoV-19/Mexico/CMX-InDRE_FB19393_S4508/2021 | EPI_ISL_3046076 | B.1.1.7 | GRY | 39 | C241T,C913T,C2453T,C3037T,C3267T,A3481T,C5388A,C5986T,T6954C,C9611T,C10543T,C14408T,C14676T,C15279T,T16176C,T19305C,C21008T,C21855T,G21974C,A23063T,C23271A,A23403G,C23604A,C23709T,T24506G,G24914C,G25437T,C27643T,C27972T,G28048T,A28111G,G28280C,A28281T,T28282A,A28295G,G28881A,G28882A,G28883C,C28977T                                                  |  |  | 26                                                                                                                                                                                                                                                                                                  | S:A570D,S:D614G,S:P681H,S:T716I,S:5982A,S:D1118H                        | 0   |
| hCoV-19/Mexico/CMX-InDRE_FB19400_S4509/2021 | EPI_ISL_3033362 | B.1.1.7 | GRY | 39 | C241T,C913T,A2317T,C2453T,C3037T,C3267T,C5388A,C5986T,C6433T,T6954C,C9611T,C11750T,C14408T,C14676T,C15279T,T16176C,C21008T,C21855T,G21974C,A23063T,C23271A,A23403G,C23604A,C23709T,T24506G,G24914C,C27643T,C27972T,T2797G,G28048T,A28111G,G28280C,A28281T,T28282A,A28295G,G28881A,G28882A,G28883C,C28977T                                                    |  |  | 24                                                                                                                                                                                                                                                                                                  | S:H5982A,S:D1118H,S:E1258D                                              | 0   |
| hCoV-19/Mexico/CMX-InDRE_FB45086_S1508/2021 | EPI_ISL_1805486 | B.1.1.7 | GRY | 40 | 111G,G28280C,A28281T,T28282A,G28881A,G28882A,G28883C,C28977T                                                                                                                                                                                                                                                                                                 |  |  | 24                                                                                                                                                                                                                                                                                                  | S982A,S:D1118H,S:E1258D,S:D1259H                                        | 22  |
| hCoV-19/Mexico/CMX-InDRE_FB49735_S1767/2021 | EPI_ISL_2101906 | B.1.1.7 | GRY | 34 | C241T,C913T,C1943T,C2110T,C3037T,C3267T,C5388A,C5986T,T6954C,T7984C,C14120T,C14408T,C14676T,C15279T,T16176C,C19390T,A23063T,C23271A,A23403G,C23604A,C23709T,T24506G,G24914C,A25336C,G25337C,C27972T,G28048T,A28111G,G28280C,A28281T,T28282A,A28295G,G28881A,G28882A,G28883C,C28977T                                                                          |  |  | 20                                                                                                                                                                                                                                                                                                  | S:P681H,S:T716I,S:5982A,S:D1118H,S:G1219C,S:E1258D                      | 0   |
| hCoV-19/Mexico/CMX-InDRE_FB54664_S1768/2021 | EPI_ISL_2101907 | B.1.1.7 | GRY | 66 | G24914C,C25207T,C27972T,G28048T,A28111G,G28280C,A28281T,T28282A,G28881A,G28882A,C14120T,C14408T,C14676T,C15279T,T16176C,C19390T,A23063T,C23271A,A23403G,C23604A,C23709T,A24070T,T24506G,G24914C,A25336C,G25337C,C27972T,G28048T,A28111G,G28280C,A28281T,T28282A,A28295G,G28881A,G28882A,G28883C,C28977T                                                      |  |  | 21                                                                                                                                                                                                                                                                                                  | R52I,ORF8:Y73C,S:N501Y,S:A570D,S:D614G,S:P681H,S:T716I,S:5982A,S:D1118H | 0   |
| hCoV-19/Mexico/CMX-InDRE_FB54888_S1769/2021 | EPI_ISL_2101908 | B.1.1.7 | GRY | 40 | 111G,G28280C,A28281T,T28282A,G28881A,G28882A,G28883C,C28977T                                                                                                                                                                                                                                                                                                 |  |  | 25                                                                                                                                                                                                                                                                                                  | S:T716I,S:Q836H,S:5982A,S:D1118H,S:E1258D                               | 18  |
| hCoV-19/Mexico/CMX-InDRE_FB55350_S1770/2021 | EPI_ISL_2101909 | B.1.1.7 | GRY | 36 | 881A,G28882A,G28883C,C28977T,C29642T                                                                                                                                                                                                                                                                                                                         |  |  | 23                                                                                                                                                                                                                                                                                                  | S:D1118H,S:E1258D                                                       | 0   |
| hCoV-19/Mexico/CMX-InDRE_FB57542_S1771/2021 | EPI_ISL_2101910 | B.1.1.7 | GRY | 39 | 280C,A28281T,T28282A,G28881A,G28882A,G28883C,C28977T                                                                                                                                                                                                                                                                                                         |  |  | 23                                                                                                                                                                                                                                                                                                  | A5,S:D1118H,S:E1258D                                                    | 311 |
| hCoV-19/Mexico/CMX-InDRE_FB58317_S1772/2021 | EPI_ISL_2101911 | B.1.1.7 | GRY | 38 | 8281T,T28282A,G28881A,G28882A,G28883C,C28977T                                                                                                                                                                                                                                                                                                                |  |  | 23                                                                                                                                                                                                                                                                                                  | A5,S:D1118H,S:E1258D                                                    | 81  |







|                                           |                 |         |     |    |                                                                                                                                                                                                                                                                                                                                                                                                                                                                                                                         |                                                                                                                                                                                                                                          |    |      |
|-------------------------------------------|-----------------|---------|-----|----|-------------------------------------------------------------------------------------------------------------------------------------------------------------------------------------------------------------------------------------------------------------------------------------------------------------------------------------------------------------------------------------------------------------------------------------------------------------------------------------------------------------------------|------------------------------------------------------------------------------------------------------------------------------------------------------------------------------------------------------------------------------------------|----|------|
| hCoV-19/Mexico/CMX-INMEGEN-04-05-72/2021  | EPI_ISL_1711299 | B.1.1.7 | GRY | 35 | C241T,C913T,C2453T,C3037T,C3267T,C5388A,C5986T,T6954C,G9611T,C14408T,C14676T,C15279T,T16176C,C21855T,G21974C,A23063T,C23271A,A23403G,A23503G,C23604A,C23709T,T24506G,G24914C,G25440T,C27972T,G28048T,A28111G,G28280C,A28281T,T28282A,A28295G,G28881A,G28882A,G28883C,C28977T                                                                                                                                                                                                                                            | N:D3L:N:N8D,N:R203K,N:G204R,N:S235F,ORF1a:1730F,ORF1a:T1001,ORF1a:A1708D,ORF1a:I2230T,ORF1a:L3116F,ORF1b:P314L,ORF3a:K16N,ORF8:Q27*,ORF8:R52I,ORF8:Y73C,S:598F,S:D138H,S:N501Y,S:A570D,S:D614G,S:P681H,S:T716I,S:S982A,S:D1118H          | 6  | 0    |
| hCoV-19/Mexico/CMX-INMEGEN-04-06-38/2021  | EPI_ISL_1807344 | B.1.1.7 | GR  | 41 | C241T,C913T,C3037T,C3267T,C5388A,C5944T,C5986T,G6647A,T6954C,G8021T,C14408T,C14676T,T15096C,C15279T,T16176C,C17676T,C18183T,C19524T,G21255T,A21519C,C23271A,A23403G,C23604A,C23709T,T24506G,G24914C,G25440T,C27972T,G28048T,A28095T,A28111G,G28280C,A28281T,T28282A,G28881A,G28882A,G28883C,C28977T                                                                                                                                                                                                                     | N:D3L:N:N8D,N:R203K,N:G204R,N:S235F,ORF1a:T1001,ORF1a:A1708D,ORF1a:A2128T,ORF1a:I2230T,ORF1a:V2586F,ORF1b:P314L,ORF1b:R2684S,ORF3a:H78Y,O:R8:Q27*,ORF8:R52I,ORF8:K68*,ORF8:Y73C,S:A570D,S:D614G,S:P681H,S:T716I,S:Q836H,S:S982A,S:D1118H | 6  | 774  |
| hCoV-19/Mexico/CMX-INMEGEN-04-06-73/2021  | EPI_ISL_1807363 | B.1.1.7 | GRY | 35 | C241T,C913T,C3037T,C3267T,C5388A,C5986T,T6954C,C9611T,C14408T,C14676T,C15279T,T16176C,C21855T,G21974C,A23063T,C23271A,A23403G,A23503G,C23604A,C23709T,T24506G,G24914C,G25440T,C27972T,G28048T,A28111G,G28280C,A28281T,T28282A,A28295G,G28881A,G28882A,G28883C,C28977T                                                                                                                                                                                                                                                   | N:D3L:N:N8D,N:R203K,N:G204R,N:S235F,ORF1a:1730F,ORF1a:T1001,ORF1a:A1708D,ORF1a:I2230T,ORF1a:L3116F,ORF1b:P314L,ORF3a:K16N,ORF8:Q27*,ORF8:R52I,ORF8:Y73C,S:598F,S:D138H,S:N501Y,S:A570D,S:D614G,S:P681H,S:T716I,S:S982A,S:D1118H          | 24 | 29   |
| hCoV-19/Mexico/CMX-INMEGEN-04-07-195/2021 | EPI_ISL_2080627 | B.1.1.7 | G   | 26 | C241T,C913T,C3037T,C3267T,C5388A,C5986T,T6954C,G7761T,C14408T,C14676T,C15279T,T16176C,C23271A,A23403G,C23604A,C23709T,T24506G,G24914C,G25217T,A25601T,G26727T,C2048T,A28111G,G28280C,A28281T,T28282A                                                                                                                                                                                                                                                                                                                    | N:D3L:ORF1a:T1001,ORF1a:P1640H,ORF1a:A1708D,ORF1a:I2230T,ORF1a:G2499V,ORF1b:P314L,ORFb:W27*,ORF8:Q27*,ORF8:R52I,ORF8:Y73C,S:A570D,S:D614G,S:P681H,S:T716I,S:S982A,S:D1118H                                                               | 17 | 6705 |
| hCoV-19/Mexico/CMX-INMEGEN-04-07-230/2021 | EPI_ISL_2080647 | B.1.1.7 | GR  | 33 | C241T,C913T,C3037T,C3267T,C5388A,C5986T,T6954C,C9611T,C14408T,C14676T,C15279T,T16176C,C23271A,A23403G,C23604A,C23709T,T24506G,G24914C,G25217T,A25601T,G26727T,C27923T,C27972T,G28048T,A28111G,G28280C,A28281T,T28282A,A28436T,G28881A,G28882A,G28883C,C28977T                                                                                                                                                                                                                                                           | N:D3L:N:N8D,N:R203K,N:G204R,N:S235F,ORF1a:T1001,ORF1a:A1708D,ORF1a:I2230T,ORF1b:P314L,ORFb:W27*,ORF8:Q27*,ORF8:R52I,ORF8:Y73C,S:A570D,S:D614G,S:P681H,S:T716I,S:S982A,S:D1118H                                                           | 23 | 397  |
| hCoV-19/Mexico/CMX-INMEGEN-04-07-243/2021 | EPI_ISL_2080658 | B.1.1.7 | GR  | 34 | C241T,C913T,C3037T,C3267T,C4900T,C5388A,C5986T,T6954C,A12162G,C13994T,C14408T,C14676T,C15279T,T16176C,T17499C,A17615G,A21137G,C23271A,A23403G,C23604A,C23709T,T24506G,G24914C,G25135T,C27972T,G28048T,A28111G,G28280C,A28281T,T28282A,G28881A,G28882A,G28883C,C28977T,G29715T                                                                                                                                                                                                                                           | M:A69S,N:D3L:N:A55S,N:R203K,N:G204R,N:S235F,ORF1a:T1001,ORF1a:A1708D,ORF1a:I2230T,ORF1b:P314L,ORFb:W27*,ORF8:Q27*,ORF8:R52I,ORF8:Y73C,S:A570D,S:D614G,S:P681H,S:T716I,S:S982A,S:D1118H,S:G1219C                                          | 21 | 2913 |
| hCoV-19/Mexico/CMX-INMEGEN-04-07-292/2021 | EPI_ISL_2080689 | B.1.1.7 | GR  | 35 | C241T,C913T,C3037T,C3267T,C5388A,C5986T,T6954C,A12162G,C13994T,C14408T,C14676T,C15279T,T16176C,T17499C,A17615G,A21137G,C23271A,A23403G,C23604A,C23709T,T24506G,G24914C,G25135T,C27972T,G28048T,A28111G,G28280C,A28281T,T28282A,G28881A,G28882A,G28883C,C28977T                                                                                                                                                                                                                                                          | N:D3L:N:R203K,N:G204R,N:S235F,ORF1a:T1001,ORF1a:A1708D,ORF1a:I2230T,ORF1a:Q3966R,ORF1b:A176V,ORF1b:P314L,ORF1b:K1383R,ORF1b:K2557R,ORF8:Q27*,ORF8:R52I,ORF8:Y73C,S:A570D,S:D614G,S:P681H,S:T716I,S:S982A,S:D1118H,S:K191N                | 22 | 1731 |
| hCoV-19/Mexico/CMX-INMEGEN-05-01-108/2021 | EPI_ISL_2230864 | B.1.1.7 | GRY | 33 | C241T,C913T,C3037T,C3267T,C5388A,C5944T,C5986T,T6954C,A8848G,C14408T,C14676T,C15279T,T16176C,T19624C,C22987T,A23063T,C23271A,A23403G,C23604A,C23709T,T24506G,G24914C,G25135T,C27972T,G28048T,A28111G,G28280C,A28281T,T28282A,G28881A,G28882A,G28883C,C28977T                                                                                                                                                                                                                                                            | N:D3L:N:R203K,N:G204R,N:S235F,ORF1a:T1001,ORF1a:A1708D,ORF1a:I2230T,ORF1b:P314L,ORF8:Q27*,ORF8:R52I,ORF8:Y73C,S:N501Y,S:A570D,S:D614G,S:P681H,S:T716I,S:S982A,S:D1118H                                                                   | 18 | 0    |
| hCoV-19/Mexico/CMX-INMEGEN-05-01-177/2021 | EPI_ISL_2230880 | B.1.1.7 | GRY | 38 | C241T,C913T,C3037T,C3267T,C5388A,C5944T,C5986T,T6954C,C967T,C13585T,C14408T,C14676T,C15279T,T16176C,A17344G,G18412T,C22987T,A23063T,C23271A,A23403G,C23604A,C23709T,T24506G,G24914C,G25135T,C27972T,G28048T,A28095T,A28111G,G28280C,A28281T,T28282A,G28881A,G28882A,G28883C,C28977T                                                                                                                                                                                                                                     | N:D3L:N:R203K,N:G204R,N:S235F,ORF1a:T1001,ORF1a:A1708D,ORF1a:I2230T,ORF1b:P314L,ORF1b:I293V,ORF1b:V164F,ORF8:Q27*,ORF8:R52I,ORF8:K68*,ORF8:Y73C,S:N501Y,S:A570D,S:D614G,S:P681H,S:T716I,S:S982A,S:D1118H                                 | 21 | 0    |
| hCoV-19/Mexico/CMX-INMEGEN-05-01-191/2021 | EPI_ISL_2230820 | B.1.1.7 | GR  | 34 | 8882A,G28883C,C28977T                                                                                                                                                                                                                                                                                                                                                                                                                                                                                                   | N:D3L:N:R203K,N:G204R,N:S235F,ORF1a:T1001,ORF1a:A1708D,ORF1a:I2230T,ORF1b:P314L,ORF8:Q27*,ORF8:R52I,ORF8:Y73C,S:N501Y,S:A570D,S:D614G,S:P681H,S:T716I,S:S982A,S:D1118H                                                                   | 22 | 818  |
| hCoV-19/Mexico/CMX-INMEGEN-05-01-192/2021 | EPI_ISL_2105723 | B.1.1.7 | GR  | 32 | G174C,C241T,C913T,C3037T,C3267T,C5388A,C5986T,C6196T,T6954C,C11750T,C14408T,C14676T,C15279T,T16176C,C23271A,A23403G,C23604A,C23709T,T24506G,G24914C,C27972T,G28048T,A28111G,G28280C,A28281T,T28282A,G28881A,G28882A,G28883C,C28977T,C29521T,C241T,C913T,C3037T,C3267T,C3784T,C5388A,C5986T,T6954C,A4779G,C9611T,C14408T,C14676T,C15279T,T16176C,C21855T,G21974C,A23063T,C23271A,A23403G,C23604A,C23709T,T24506G,G24914C,G25440T,C27972T,G28048T,A28111G,G28280C,A28281T,T28282A,A28295G,G28881A,G28882A,G28883C,C28977T | N:D3L:N:R203K,N:G204R,N:S235F,ORF1a:T1001,ORF1a:A1708D,ORF1a:I2230T,ORF1b:P314L,ORF1b:I293V,ORF1b:V164F,ORF8:Q27*,ORF8:R52I,ORF8:K68*,ORF8:Y73C,S:N501Y,S:A570D,S:D614G,S:P681H,S:T716I,S:S982A,S:D1118H,S:K191N                         | 20 | 829  |
| hCoV-19/Mexico/CMX-INMEGEN-05-01-221/2021 | EPI_ISL_2105741 | B.1.1.7 | GRY | 35 | 1A,G28882A,G28883C,C28977T                                                                                                                                                                                                                                                                                                                                                                                                                                                                                              | N:D3L:N:R203K,N:G204R,N:S235F,ORF1a:T1001,ORF1a:A1708D,ORF1a:I2230T,ORF1a:Q3966R,ORF1b:A176V,ORF1b:P314L,ORF1b:K1383R,ORF1b:K2557R,ORF8:Q27*,ORF8:R52I,ORF8:Y73C,S:A570D,S:D614G,S:P681H,S:T716I,S:S982A,S:D1118H                        | 24 | 1188 |
| hCoV-19/Mexico/CMX-INMEGEN-05-01-226/2021 | EPI_ISL_2105746 | B.1.1.7 | GR  | 36 | C241T,C913T,C3037T,C3267T,C4900T,C5388A,C5986T,T6954C,A12162G,C13994T,C14408T,C14676T,C15279T,C15371T,C15720T,T16176C,T17499C,A17615G,A21137G,C23271A,A23403G,C23604A,C23709T,T24506G,G24914C,G25135T,C27972T,G28048T,A28111G,G28280C,A28281T,T28282A,G28881A,G28882A,G28883C,C28977T                                                                                                                                                                                                                                   | N:D3L:N:R203K,N:G204R,N:S235F,ORF1a:T1001,ORF1a:A1708D,ORF1a:I2230T,ORF1a:C3766F,ORF1b:P314L,ORF8:Q27*,ORF8:R52I,ORF8:K68*,ORF8:Y73C,S:N501Y,S:A570D,S:D614G,S:P681H,S:T716I,S:S982A,S:D1118H                                            | 23 | 960  |
| hCoV-19/Mexico/CMX-INMEGEN-05-01-228/2021 | EPI_ISL_2105748 | B.1.1.7 | GRY | 36 | 8881A,G28882A,G28883C,C28977T                                                                                                                                                                                                                                                                                                                                                                                                                                                                                           | M:A69S,N:D3L:N:R203K,N:G204R,N:S235F,ORF1a:T1001,ORF1a:A1708D,ORF1a:I2230T,ORF1b:P314L,ORF8:Q27*,ORF8:R52I,ORF8:Y73C,S:N501Y,S:A570D,S:D614G,S:P681H,S:T716I,S:S982A,S:D1118H                                                            | 21 | 258  |
| hCoV-19/Mexico/CMX-INMEGEN-05-01-229/2021 | EPI_ISL_2105749 | B.1.1.7 | GRY | 33 | C241T,C913T,C3037T,C3267T,C5388A,C5986T,T6954C,A8848G,C14408T,C14676T,C15279T,T16176C,A23063T,C23271A,A23403G,C23604A,C23709T,T24506G,G24914C,G25440T,C27972T,G28048T,A28111G,G28280C,A28281T,T28282A,G28881A,G28882A,G28883C,C28977T                                                                                                                                                                                                                                                                                   | N:D3L:N:R203K,N:G204R,N:S235F,ORF1a:T1001,ORF1a:A1708D,ORF1a:I2230T,ORF1b:P314L,ORF8:Q27*,ORF8:R52I,ORF8:Y73C,S:N501Y,S:A570D,S:D614G,S:P681H,S:T716I,S:S982A,S:D1118H,S:G1219C                                                          | 20 | 0    |
| hCoV-19/Mexico/CMX-INMEGEN-05-01-260/2021 | EPI_ISL_2105773 | B.1.1.7 | GRY | 37 | 28282A,G28881A,G28882A,G28883C,C28977T                                                                                                                                                                                                                                                                                                                                                                                                                                                                                  | N:D3L:N:R203K,N:G204R,N:S235F,ORF1a:T1001,ORF1a:A1708D,ORF1a:I2230T,ORF1a:A3625S,ORF1a:M3712I,ORF1a:P314L,ORF1a:S26L,ORF1b:A43V,ORF8:Q27*,ORF8:R52I,ORF8:Y73C,S:G181V,S:N501Y,S:A570D,S:D614G,S:P681H,S:T716I,S:S982A,S:D1118H           | 23 | 1628 |
| hCoV-19/Mexico/CMX-INMEGEN-05-01-262/2021 | EPI_ISL_2105775 | B.1.1.7 | GRY | 37 | T28282A,G28881A,G28882A,G28883C,C28977T                                                                                                                                                                                                                                                                                                                                                                                                                                                                                 | N:D3L:N:R203K,N:G204R,N:S235F,ORF1a:T1001,ORF1a:A1708D,ORF1a:I2230T,ORF1a:A3625S,ORF1a:M3712I,ORF1a:P314L,ORF1a:S26L,ORF1b:A43V,ORF8:Q27*,ORF8:R52I,ORF8:Y73C,S:G181V,S:N501Y,S:A570D,S:D614G,S:P681H,S:T716I,S:S982A,S:D1118H           | 23 | 1628 |
| hCoV-19/Mexico/CMX-INMEGEN-05-01-272/2021 | EPI_ISL_2105784 | B.1.1.7 | GR  | 39 | 1T,T28282A,G28881A,G28882A,G28883C,C28977T,C29546T                                                                                                                                                                                                                                                                                                                                                                                                                                                                      | N:D3L:N:R203K,N:G204R,N:S235F,ORF1a:T1001,ORF1a:A1708D,ORF1a:I2230T,ORF1a:L3606F,ORF1b:P314L,ORF8:Q27*,ORF8:R52I,ORF8:Y73C,S:P26A,S:N501Y,S:A570D,S:D614G,S:P681H,S:T716I,S:S982A,S:D1118H                                               | 21 | 8375 |
| hCoV-19/Mexico/CMX-INMEGEN-05-01-301/2021 | EPI_ISL_2105810 | B.1.1.7 | GRY | 34 | C241T,C913T,C3037T,C3267T,C5388A,C5944T,C5986T,T6954C,A8848G,G11083T,C14408T,C14676T,C15279T,T16176C,C21638G,A23063T,C23271A,A23403G,C23604A,C23709T,T24506G,G24914C,G27641T,C27972T,G28048T,A28111G,G28280C,A28281T,T28282A,G28881A,G28882A,G28883C,C28977T,C14408T,C14676T,C15279T,T16176C,C23271A,A23403G,C23604A,C23709T,T24506G,G24914C,G25217T,G26727T,C27972T,G28048T,A28111G,G28280C,A28281T,T28282A,G29715T,G29825T                                                                                            | M:A69S,N:D3L:ORF1a:A1708D,ORF1b:P314L,ORF8:Q27*,ORF8:R52I,ORF8:Y73C,S:A570D,S:D614G,S:P681H,S:T716I,S:S982A,S:D1118H,S:G1219C                                                                                                            | 14 | 8375 |

|                                           |                 |         |     |    |                                                                                                                                                                                                                                                                                                                                                                                                                                                                                                                                                                                                                                                                                                                                                      |    |                                                                                                                                                                                                                                       |      |
|-------------------------------------------|-----------------|---------|-----|----|------------------------------------------------------------------------------------------------------------------------------------------------------------------------------------------------------------------------------------------------------------------------------------------------------------------------------------------------------------------------------------------------------------------------------------------------------------------------------------------------------------------------------------------------------------------------------------------------------------------------------------------------------------------------------------------------------------------------------------------------------|----|---------------------------------------------------------------------------------------------------------------------------------------------------------------------------------------------------------------------------------------|------|
| hCoV-19/Mexico/CMX-INMEGEN-05-01-319/2021 | EPI_ISL_2105826 | B.1.1.7 | GR  | 36 | C241T,C913T,C2110T,C3037T,C3267T,C5388A,C5986T,T6954C,G7042T,A10195G,C10279T,C14120T,C14408T,C14676T,C15279T,T16176C,C21588T,C23271A,A23403G,C23604A,C23709T,T24506G,T24565C,G24914C,C27972T,G28048T,G28075T,A28095T,A28111G,G28280C,A28281T,G28282A,G28882A,G28883C,C28977T                                                                                                                                                                                                                                                                                                                                                                                                                                                                         | 22 | N:D3L:N:R203K,N:G204R,N:S235F,ORF1a:T1001,ORF1a:A1708D,ORF1a:I2230T,ORF1a:M2259,ORF1b:P218L,ORF1b:P314L,ORF8:Q27*,ORF8:R52J,ORF8:C61F,ORF8:K68*,ORF8:Y73C,S:P91S,AS70D,S:D614G,S:P681H,S:T716I,S:S982A,S:D1118H                       | 431  |
| hCoV-19/Mexico/CMX-INMEGEN-05-01-42/2021  | EPI_ISL_2230892 | B.1.1.7 | GR  | 32 | C913T,C2453T,C3037T,C3267T,C5388A,C5986T,T6954C,C9611T,C14408T,C14676T,C15279T,T16176C,C21855T,G21974C,C23271A,A23403G,C23604A,C23709T,T24506G,G24914C,G25440T,C27972T,G28048T,A28111G,G28280C,A28281T,T28282A,A28295G,G28881A,G28882A,G28883C,C28977T                                                                                                                                                                                                                                                                                                                                                                                                                                                                                               | 23 | N:D3L:N:N8D,N:R203K,N:G204R,N:S235F,ORF1a:L730F,ORF1a:T1001,ORF1a:A1708D,ORF1a:I2230T,ORF1a:L3116F,ORF1b:P314L,ORF3a:K16N,ORF8:Q27*,ORF8:R52J,ORF8:Y73C,S:S98F,S:D138H,S:A570D,S:D614G,S:P681H,S:T716I,S:S982A,S:D1118H               | 1629 |
| hCoV-19/Mexico/CMX-INMEGEN-05-01-74/2021  | EPI_ISL_2277643 | B.1.1.7 | G   | 30 | C913T,C1612T,C2453T,C3037T,C3267T,C5388A,C5986T,C8964T,C9611T,C14408T,C14676T,C15279T,T16176C,C21855T,G21974C,C23271A,A23403G,C23604A,C23709T,T24506G,G24914C,G25440T,C27972T,G28048T,A28111G,G28280C,A28281T,T28282A,A28295G,C28977T                                                                                                                                                                                                                                                                                                                                                                                                                                                                                                                | 20 | N:D3L:N:N8D,N:R203K,N:G204R,N:S235F,ORF1a:L730F,ORF1a:T1001,ORF1a:A1708D,ORF1a:I2230T,ORF1a:L3116F,ORF1b:P314L,ORF3a:K16N,ORF8:Q27*,ORF8:R52J,ORF8:Y73C,S:S98F,S:D138H,S:A570D,S:D614G,S:P681H,S:T716I,S:S982A,S:D1118H               | 8795 |
| hCoV-19/Mexico/CMX-INMEGEN-05-01-87/2021  | EPI_ISL_2277644 | B.1.1.7 | G   | 29 | C913T,C1612T,C2453T,C3037T,C3267T,C5388A,C5986T,C8964T,C9611T,C14408T,C14676T,C15279T,T16176C,C21855T,G21974C,C23271A,A23403G,C23604A,C23709T,T24506G,G24914C,G25440T,C27972T,G28048T,A28111G,G28280C,A28281T,T28282A                                                                                                                                                                                                                                                                                                                                                                                                                                                                                                                                | 18 | N:D3L:N:R203K,N:G204R,N:S235F,ORF1a:T1001,ORF1a:A1708D,ORF1a:I2230T,ORF1b:P314L,ORF8:Q27*,ORF8:R52J,ORF8:Y73C,S:A570D,S:D614G,S:P681H,S:T716I,S:S982A,S:D1118H                                                                        | 5914 |
| hCoV-19/Mexico/CMX-INMEGEN-05-01-98/2021  | EPI_ISL_2230863 | B.1.1.7 | GRY | 32 | C241T,C913T,C3037T,C3267T,C5388A,C5986T,C6196T,T6954C,A8848G,C14408T,C14676T,C15279T,T16176C,T19624C,A23063T,C23271A,A23403G,C23604A,C23709T,T24506G,G24914C,C27972T,G28048T,A28111G,G28280C,A28281T,T28282A,G28881A,G28882A,G28883C,C28977T                                                                                                                                                                                                                                                                                                                                                                                                                                                                                                         | 18 | N:D3L:N:R203K,N:G204R,N:S235F,ORF1a:T1001,ORF1a:A1708D,ORF1a:I2230T,ORF1b:P314L,ORF8:Q27*,ORF8:R52J,ORF8:Y73C,S:A570D,S:D614G,S:P681H,S:T716I,S:S982A,S:D1118H                                                                        | 0    |
| hCoV-19/Mexico/CMX-INMEGEN-05-02-101/2021 | EPI_ISL_2230870 | B.1.1.7 | GRY | 35 | C823T,C913T,C2110T,G3004T,C3037T,C3267T,C5388A,C5986T,T6954C,G7042T,C14120T,C14408T,C14676T,C14928T,C15279T,T16176C,C23271A,A23403G,C23604A,C23709T,T24506G,G24914C,C26110T,C27972T,G28048T,A28095T,A28111G,G28280C,A28281T,T28282A,C28977T                                                                                                                                                                                                                                                                                                                                                                                                                                                                                                          | 24 | N:D3L:N:S235F,ORF1a:E913D,ORF1a:T1001,ORF1a:A1708D,ORF1a:I2230T,ORF1a:M2259,ORF1b:P218L,ORF1b:P314L,ORF8:Q27*,ORF8:R52J,ORF8:K68*,ORF8:Y73C,S:A570D,S:D614G,S:P681H,S:T716I,S:S982A,S:D1118H                                          | 0    |
| hCoV-19/Mexico/CMX-INMEGEN-05-02-107/2021 | EPI_ISL_2881754 | B.1.1.7 | G   | 31 | C913T,C3037T,C3267T,C5388A,C5986T,C6196T,T6954C,A8848G,C14408T,C14676T,C15279T,T16176C,C23271A,T23332C,A23403G,C23604A,C23709T,T24506G,G24914C,G25217T,G26727T,C27972T,G28048T,A28111G,G28280C,A28281T,T28282A,G28881A,G28882A,G28883C,C28977T                                                                                                                                                                                                                                                                                                                                                                                                                                                                                                       | 20 | N:D3L:N:R203K,N:G204R,N:S235F,ORF1a:T1001,ORF1a:A1708D,ORF1a:I2230T,ORF1b:P314L,ORF8:Q27*,ORF8:R52J,ORF8:Y73C,S:A570D,S:D614G,S:P681H,S:T716I,S:S982A,S:D1118H,S:G1219C                                                               | 2158 |
| hCoV-19/Mexico/CMX-INMEGEN-05-02-108/2021 | EPI_ISL_2230830 | B.1.1.7 | GR  | 32 | C241T,C913T,C2453T,C3037T,C3267T,C5388A,C5986T,C6196T,T6954C,A8848G,C9073T,C14408T,C14676T,C15279T,T16176C,T19624C,A23063T,C23271A,A23403G,C23604A,C23709T,T24506G,G24914C,C27972T,G28048T,A28111G,G28280C,A28281T,T28282A,G28881A,G28882A,G28883C,C28977T                                                                                                                                                                                                                                                                                                                                                                                                                                                                                           | 19 | N:D3L:N:R203K,N:G204R,N:S235F,ORF1a:T1001,ORF1a:A1708D,ORF1a:I2230T,ORF1b:P314L,ORF8:Q27*,ORF8:R52J,ORF8:Y73C,S:N501Y,S:A570D,S:D614G,S:P681H,S:T716I,S:S982A,S:D1118H                                                                | 609  |
| hCoV-19/Mexico/CMX-INMEGEN-05-02-109/2021 | EPI_ISL_2230872 | B.1.1.7 | GRY | 34 | G:G24914C,C27972T,G28048T,A28111G,G28280C,A28281T,T28282A,G28881A,G28882A,G28883C,C241T,C913T,C3037T,C3267T,C5388A,C5986T,C6196T,T6954C,A8848G,C14408T,C14676T,C15279T,T16176C,T19624C,A23063T,C23271A,A23403G,C23604A,C23709T,T24506G,G24914C,G25217T,C27972T,G28048T,A28111G,G28280C,A28281T,T28282A,G28881A,G28882A,G28883C,C28977T                                                                                                                                                                                                                                                                                                                                                                                                               | 18 | N:D3L:N:R203K,N:G204R,N:S235F,ORF1a:T1001,ORF1a:A1708D,ORF1a:I2230T,ORF1b:P314L,ORF8:Q27*,ORF8:R52J,ORF8:Y73C,S:N501Y,S:A570D,S:D614G,S:P681H,S:T716I,S:S982A,S:D1118H                                                                | 0    |
| hCoV-19/Mexico/CMX-INMEGEN-05-02-122/2021 | EPI_ISL_2230873 | B.1.1.7 | GRY | 32 | C241T,C913T,C3037T,C3267T,C5388A,C5986T,C6196T,T6954C,A8848G,C14408T,C14676T,C15279T,T16176C,T19624C,A23063T,C23271A,A23403G,C23604A,C23709T,T24506G,G24914C,G25217T,C27972T,G28048T,A28111G,G28280C,A28281T,T28282A,G28881A,G28882A,G28883C,C28977T                                                                                                                                                                                                                                                                                                                                                                                                                                                                                                 | 20 | N:D3L:N:A1195N,R203K,N:G204R,N:S235F,ORF1a:T1001,ORF1a:A1708D,ORF1a:I2230T,ORF1a:A1708D,ORF1a:I2230T,ORF1a:L3606F,ORF1b:P314L,ORF7b:A43V,ORF8:Q27*,ORF8:R52J,ORF8:Y73C,S:A570D,S:D614G,S:P681H,S:T716I,S:S982A,S:D1118H               | 28   |
| hCoV-19/Mexico/CMX-INMEGEN-05-02-123/2021 | EPI_ISL_2230875 | B.1.1.7 | GRY | 38 | C241T,C913T,C2110T,G3004T,C3037T,C3267T,C456T,C5388A,C5986T,T6954C,A12850G,C14120T,C14408T,C14676T,C15279T,T16176C,C16733T,C19390T,G20578T,A23063T,C23271A,A23403G,C23604A,C23683T,C23709T,T24506G,C24904T,G24914C,C27972T,G28048T,A28095T,A28111G,G28280C,A28281T,T28282A,A28467G,C28977T                                                                                                                                                                                                                                                                                                                                                                                                                                                           | 21 | N:D3L:N:K65R,N:S235F,ORF1a:T1001,ORF1a:A1708D,ORF1a:I2230T,ORF1b:P218L,ORF1b:P314L,ORF1b:S1089,ORF1b:P1975,ORF1b:V2371L,ORF8:Q27*,ORF8:R52J,ORF8:K68*,ORF8:Y73C,ORF8b:IN62D,S:N501Y,S:A570D,S:D614G,S:P681H,S:T716I,S:S982A,S:D1118H  | 239  |
| hCoV-19/Mexico/CMX-INMEGEN-05-02-159/2021 | EPI_ISL_2230882 | B.1.1.7 | G   | 31 | C241T,C913T,C2110T,G3004T,C3037T,C3267T,C5388A,C5986T,T6954C,G7042T,C10728T,A10729G,A10730T,C14120T,C14408T,C14676T,C15279T,T16176C,C19602T,A23063T,C23271A,A23403G,C23604A,C23709T,T24506G,G24914C,C27689T,C27972T,G28001T,G28048T,A28095T,A28111G,G28280C,A28281T,T28282A,G28881A,G28882A,G28883C,C28977T                                                                                                                                                                                                                                                                                                                                                                                                                                          | 25 | N:D3L:N:R203K,N:G204R,N:S235F,ORF1a:T1001,ORF1a:A1708D,ORF1a:I2230T,ORF1b:P314L,ORF7a:P99L,ORF8:Q27*,ORF8:R52J,ORF8:K68*,ORF8:Y73C,S:N501Y,S:A570D,S:D614G,S:P681H,S:T716I,S:S982A,S:D1118H                                           | 266  |
| hCoV-19/Mexico/CMX-INMEGEN-05-02-172/2021 | EPI_ISL_2230884 | B.1.1.7 | GRY | 31 | C241T,C913T,C3037T,C3267T,C5388A,C5986T,C6196T,T6954C,A8848G,C14408T,C14676T,C15279T,T16176C,T19624C,A23063T,C23271A,A23403G,C23604A,C23709T,T24506G,G24914C,G25217T,C27972T,G28048T,A28111G,G28280C,A28281T,T28282A,G28881A,G28882A,G28883C,C28977T                                                                                                                                                                                                                                                                                                                                                                                                                                                                                                 | 19 | N:D3L:N:R203K,N:G204R,N:S235F,ORF1a:T1001,ORF1a:A1708D,ORF1a:I2230T,ORF1b:P314L,ORF8:Q27*,ORF8:R52J,ORF8:Y73C,S:N501Y,S:A570D,S:D614G,S:P681H,S:T716I,S:S982A,S:D1118H,S:G1219C                                                       | 161  |
| hCoV-19/Mexico/CMX-INMEGEN-05-02-29/2021  | EPI_ISL_2230868 | B.1.1.7 | GRY | 32 | C241T,C913T,C2453T,C3037T,C3267T,T4159C,C5388A,C5986T,T6954C,G8653T,C9611T,C9907T,C14408T,C14676T,C15279T,T16176C,C21855T,G21974C,A23063T,C23271A,A23403G,C23604A,C23709T,T24506G,G24914C,C25609T,G27758T,C27972T,G28048T,A28111G,G28280C,A28281T,T28282A,A28295G,G28881A,G28882A,G28883C,C28977T                                                                                                                                                                                                                                                                                                                                                                                                                                                    | 28 | N:D3L:N:N8D,N:R203K,N:G204R,N:S235F,ORF1a:L730F,ORF1a:P943L,ORF1a:T1001,ORF1a:A1708D,ORF1a:I2230T,ORF1a:M2796,ORF1a:L3116F,ORF1b:P314L,ORF3a:L73F,ORF7a:*I22L,ORF7b:M1I,ORF8:Q27*,ORF8:R52J,ORF8:Y73C                                 | 117  |
| hCoV-19/Mexico/CMX-INMEGEN-05-02-35/2021  | EPI_ISL_2230869 | B.1.1.7 | GRY | 34 | C241T,C913T,C3037T,C3267T,C5388A,C5944T,C5986T,G6647A,T6954C,C12003T,C14408T,C14676T,T15096C,C15279T,T16176C,C17502T,C17676T,C18183T,C19524T,A21519C,A23063T,C23271A,A23403G,C23604A,C23709T,A24070T,A24092G,T24506G,G24914C,C25624T,C27737T,C27972T,G28048T,A28095T,A28111G,G28280C,A28281T,T28282A,G28881A,G28882A,G28883C,C28977T                                                                                                                                                                                                                                                                                                                                                                                                                 | 26 | N:D3L:N:R203K,N:G204P,N:S235F,ORF1a:T1001,ORF1a:A1708D,ORF1a:I2230T,ORF1a:L3116F,ORF1b:P314L,ORF1b:I293V,ORF1b:V1649F,ORF8:Q27*,ORF8:R52J,ORF8:K68*,ORF8:Y73C,S:N501Y,S:A570D,S:D614G,S:P681H,S:T716I,S:S982A,S:D1118H                | 32   |
| hCoV-19/Mexico/CMX-INMEGEN-05-03-104/2021 | EPI_ISL_2319256 | B.1.1.7 | GRY | 43 | C241T,C913T,C3037T,C3267T,C5388A,C5944T,C5986T,T6954C,C9967T,C10868T,C13585T,C14408T,C14676T,T15096C,C15279T,T16176C,A17344G,G18412T,C22987T,A23063T,C23271A,A23403G,C23604A,C23709T,T24506G,G24914C,C27972T,G28048T,A28095T,A28111G,G28280C,A28281T,T28282A,G28881A,G28882A,G28883C,C28977T                                                                                                                                                                                                                                                                                                                                                                                                                                                         | 21 | N:D3L:N:R203K,N:G204R,N:S235F,ORF1a:L04I,ORF1a:T1001,ORF1a:A1708D,ORF1a:I2230T,ORF1b:P314L,ORF1b:P1001S,ORF1b:K1383R,ORF7a:C23F,ORF8:Q27*,ORF8:R52J,ORF8:Y73C,S:SF5K,S:F150T,S:N501Y,S:A570D,S:D614G,S:P681H,S:T716I,S:S982A,S:D1118H | 1    |
| hCoV-19/Mexico/CMX-INMEGEN-05-03-3/2021   | EPI_ISL_2319294 | B.1.1.7 | GRY | 38 | C241T,C913T,C3037T,C3267T,C5388A,C5986T,T6954C,C9967T,C10868T,C13585T,C14408T,C14676T,T15096C,C15279T,T16176C,A17344G,G18412T,C22987T,A23063T,C23271A,A23403G,C23604A,C23709T,T24506G,G24914C,C27972T,G28048T,A28095T,A28111G,G28280C,A28281T,T28282A,G28881A,G28882A,G28883C,C28977T                                                                                                                                                                                                                                                                                                                                                                                                                                                                | 24 | N:D3L:N:R203K,N:G204R,N:S235F,ORF1a:L04I,ORF1a:T1001,ORF1a:A1708D,ORF1a:I2230T,ORF1b:P314L,ORF1b:P1001S,ORF1b:K1383R,ORF7a:C23F,ORF8:Q27*,ORF8:R52J,ORF8:Y73C,S:SF5K,S:F150T,S:N501Y,S:A570D,S:D614G,S:P681H,S:T716I,S:S982A,S:D1118H | 673  |
| hCoV-19/Mexico/CMX-INMEGEN-05-03-342/2021 | EPI_ISL_2319403 | B.1.1.7 | GRY | 38 | C241T,C913T,C3037T,C3267T,T5260A,C5388A,C5986T,C14408T,C14676T,C15279T,T16176C,C16468T,A17615G,A22011C,C23271A,A23403G,C23604A,C23709T,T24506G,G24914C,G26110T,C27972T,G28048T,A28111G,G28280C,A28281T,T28282A,G28881A,G28882A,G28883C,C28977T                                                                                                                                                                                                                                                                                                                                                                                                                                                                                                       | 24 | N:D3L:N:S235F,ORF1a:L104I,ORF1a:T1001,ORF1a:A1708D,ORF1b:P314L,ORF1b:P1001S,ORF1b:K1383R,ORF7a:C23F,ORF8:Q27*,ORF8:R52J,ORF8:Y73C,S:SF5K,S:F150T,S:N501Y,S:A570D,S:D614G,S:P681H,S:T716I,S:S982A,S:D1118H                             | 1412 |
| hCoV-19/Mexico/CMX-INMEGEN-05-03-350/2021 | EPI_ISL_2319405 | B.1.1.7 | G   | 37 | G27461T,C27972T,G28048T,A28111G,G28280C,A28281T,T28282A,C28977T                                                                                                                                                                                                                                                                                                                                                                                                                                                                                                                                                                                                                                                                                      | 19 | N:D3L:N:R203K,N:G204R,N:S235F,ORF1a:T1001,ORF1a:A1708D,ORF1a:I2230T,ORF1a:S3950F,ORF1b:P314L,ORF8:Q27*,ORF8:R52J,ORF8:Y73C,S:A570D,S:D614G,S:P681H,S:T716I,S:S982A,S:D1118H                                                           | 2294 |
| hCoV-19/Mexico/CMX-INMEGEN-05-03-351/2021 | EPI_ISL_2319406 | B.1.1.7 | GR  | 38 | C913T,C2788T,C3037T,C3267T,T5260A,C5388A,C5986T,C6196T,A8848G,C11812A,C14408T,C14676T,C15279T,T16176C,C23271A,A23403G,C23604A,C23709T,T24506G,G24914C,G25217T,G2727T,C27972T,G28048T,A28111G,G28280C,A28281T,T28282A,G28881A,G28882A,G28883C,C913T,C3037T,C3267T,C5388A,C5986T,T6954C,T8569C,A13768T,C14408T,C14676T,T15096C,C15279T,T16176C,C19862T,C23271A,A23403G,C23604A,C23709T,T24506G,G24914C,G25234T,C26606T,G27281T,G28048T,A28095T,A28111G,G28280C,A28281T,T28282A,G28881A,G28882A,G28883C,C913T,C3037T,C3267T,C5388A,C5986T,C6196T,T6954C,A8848G,C12114T,C14408T,C14676T,C15279T,T16176C,T19624C,C23271A,A23403G,C23604A,C23709T,G24173A,T24506G,G24914C,G25217T,C27972T,G28048T,A28111G,G28280C,A28281T,T28282A,G28881A,G28882A,G28883C, | 18 | N:D3L:N:R203K,N:G204P,N:S235F,ORF1a:T1001,ORF1a:A1708D,ORF1a:I2230T,ORF1b:M101L,ORF1b:P314L,ORF1b:A2132V,ORF3a:W48F,ORF6:W27F,ORF8:Q27*,ORF8:R52J,ORF8:K68*,ORF8:Y73C,S:A570D,S:D614G,S:P681H,S:T716I,S:S982A,S:D1118H                | 1874 |
| hCoV-19/Mexico/CMX-INMEGEN-05-03-51/2021  | EPI_ISL_2319210 | B.1.1.7 | G   | 32 | C26606T,G27281T,G28048T,A28095T,A28111G,G28280C,A28281T,T28282A,G28881A,G28882A,G28883C,C913T,C3037T,C3267T,C5388A,C5986T,C6196T,T6954C,A8848G,C12114T,C14408T,C14676T,C15279T,T16176C,T19624C,C23271A,A23403G,C23604A,C23709T,G24173A,T24506G,G24914C,G25217T,C27972T,G28048T,A28111G,G28280C,A28281T,T28282A,G28881A,G28882A,G28883C,                                                                                                                                                                                                                                                                                                                                                                                                              | 6  | N:D3L:N:R203K,N:G204R,N:S235F,ORF1a:T1001,ORF1a:A1708D,ORF1a:I2230T,ORF1a:S3950F,ORF1b:P314L,ORF8:Q27*,ORF8:R52J,ORF8:Y73C,S:A570D,S:D614G,S:P681H,S:T716I,S:S982A,S:D1118H,S:G1219C                                                  | 1465 |
| hCoV-19/Mexico/CMX-INMEGEN-05-03-53/2021  | EPI_ISL_2319212 | B.1.1.7 | O   | 35 |                                                                                                                                                                                                                                                                                                                                                                                                                                                                                                                                                                                                                                                                                                                                                      |    |                                                                                                                                                                                                                                       |      |



|                                           |                 |         |     |    |                                                                                                                                                                                                                                                                                                                                                                                                                                                                                                                                                                                                                                                                                                                                                                                                                        |                                                                                                                                                                                                                               |      |
|-------------------------------------------|-----------------|---------|-----|----|------------------------------------------------------------------------------------------------------------------------------------------------------------------------------------------------------------------------------------------------------------------------------------------------------------------------------------------------------------------------------------------------------------------------------------------------------------------------------------------------------------------------------------------------------------------------------------------------------------------------------------------------------------------------------------------------------------------------------------------------------------------------------------------------------------------------|-------------------------------------------------------------------------------------------------------------------------------------------------------------------------------------------------------------------------------|------|
| hCoV-19/Mexico/CMX-INMEGEN-05-03-54/2021  | EPI_ISL_2319213 | B.1.1.7 | GR  | 35 | C913T,C2110T,C3037T,C3267T,C5388A,C5986T,T6954C,G7042T,A10195G,C10279T,C14120T,C14408T,C14676T,C15279T,T16176C,C16887T,G17427T,C23271A,A23403G,C23604A,C23709T,T24506G,G24914C,C27972T,G28048T,G28075T,A28111G,G28280C,A28281T,T28282A,G28881A,G28882A,G28883C,C28977T                                                                                                                                                                                                                                                                                                                                                                                                                                                                                                                                                 | N:D3L,N:R203K,N:G204R,N:S235F,ORF1a:T1001,ORF1a:A1708D,ORF1a:I2230,ORF1a:M2259,ORF1b:P218L,ORF1b:P314L,ORF8:Q27*,ORF8:R52I,ORF8:K68*,ORF8:Y73C,S:A570D,S:D614G,S:P681H,S:T716I,S:S982A,S:D1118H                               | 628  |
| hCoV-19/Mexico/CMX-INMEGEN-05-03-61/2021  | EPI_ISL_2881761 | B.1.1.7 | G   | 35 | C913T,C3037T,C3267T,C5388A,C5986T,T6954C,C9521T,C10036T,C10116T,C14408T,C14676T,C15279T,T16176C,A17615G,A19079G,C19854T,C21008T,T21579C,C23271A,A23403G,C23604A,C23709T,T24506G,G24914C,G26305T,C26326T,T6954C,C27972T,G28048T,A28111G,G28280C,A28281T,T28282A,G28280C,A28281T,T28282A,C28977T                                                                                                                                                                                                                                                                                                                                                                                                                                                                                                                         | N:D3L,N:R203K,N:G204R,N:S235F,ORF1a:T1001,ORF1a:A1708D,ORF1a:I2230,ORF1a:J230T,ORF1a:K1383R,ORF1b:E1871G,ORF1b:T2514I,ORF8:Q27*,ORF8:R52I,ORF8:Y73C,ORF8:Y11H,S:V6A,S:A570D,S:D614G,S:D1118H                                  | 3321 |
| hCoV-19/Mexico/CMX-INMEGEN-05-03-64/2021  | EPI_ISL_2319221 | B.1.1.7 | GRY | 20 | C913T,C3037T,C3267T,C5388A,C5986T,C6196T,T6954C,A8848G,C9803T,T11135C,C14408T,C14676T,C15279T,T16176C,A23063T,C23271A,A23403G,C23604A,C23709T,G24095T,T24506G,G24914C,C27972T,G28048T,A28111G,G28280C,A28281T,T28282A,G28881A,G28882A,G28883C,C241T,C913T,C3037T,C3267T,C5388A,C5986T,C6255T,T6954C,G10157T,C14408T,C14676T,C15279T,T16176C,C18162T,G22093C,A23063T,C23271A,A23403G,G23420A,C23604A,C23709T,T24506G,G24914C,G26520T,C27972T,G28048T,A28111G,G28280C,A28281T,T28282A,G28881A,C241T,C913T,C2110T,C3037T,C3267T,C4093T,C5388A,C5986T,T6954C,G7042T,C11541T,T13521C,C14120T,C14408T,C14676T,C15279T,T16176C,C16293T,C17762T,C18877T,A23063T,C23271A,A23403G,C23604A,C23709T,T24506G,G24914C,G26520T,G26202T,T6954C,C27972T,G28048T,A28095T,A28111G,G28280C,A28281T,T28282A,G28881A,G28882A,G28883C,C28977T | N:D3L,N:R203K,N:G204R,N:S235F,ORF1a:T1001,ORF1a:A1708D,ORF1a:I2230,ORF1a:F3624L,ORF1b:P314L,ORF8:Q27*,ORF8:R52I,ORF8:Y73C,S:N501Y,S:A570D,S:D614G,S:P681H,S:T716I,S:A845,S:S982A,S:D1118H                                     | 6    |
| hCoV-19/Mexico/CMX-INMEGEN-05-03-68/2021  | EPI_ISL_2319225 | B.1.1.7 | GRY | 34 | C913T,C3037T,C3267T,C5388A,C5986T,T6954C,C7299T,C11750T,C14408T,C14676T,T15096C,C15279T,T16176C,A23063T,C23271A,A23403G,C23604A,C23709T,T24506G,G24914C,G25489T,C27972T,G28048T,A28095T,A28111G,G28280C,A28281T,T28282A,G28881A,C241T,C913T,C3037T,C3267T,C5388A,C5986T,T6954C,G7042T,C11541T,T13521C,C14120T,C14408T,C14676T,C15279T,T16176C,C16293T,C17762T,C18877T,A23063T,C23271A,A23403G,C23604A,C23709T,T24506G,G24914C,G26520T,G26202T,T6954C,C27972T,G28048T,A28095T,A28111G,G28280C,A28281T,T28282A,G28881A,G28882A,G28883C,C28977T                                                                                                                                                                                                                                                                           | N:D3L,N:R203K,N:G204R,N:S235F,ORF1a:T1001,ORF1a:A1708D,ORF1a:I2230,ORF1a:M2259I,ORF1a:T3750I,ORF1b:P218L,ORF1b:P314L,ORF8:Q27*,ORF8:R52I,ORF8:Y73C,S:N501Y,S:A570D,S:D614G,S:P681H,S:T716I,S:S982A,S:D1118H                   | 88   |
| hCoV-19/Mexico/CMX-INMEGEN-05-03-8/2021   | EPI_ISL_2319177 | B.1.1.7 | GRY | 40 | 5T,A28111G,G28280C,A28281T,T28282A,G28881A,G28882A,G28883C,C28977T                                                                                                                                                                                                                                                                                                                                                                                                                                                                                                                                                                                                                                                                                                                                                     | N:D3L,N:R203K,N:G204R,N:S235F,ORF1a:T1001,ORF1a:A1708D,ORF1a:I2230,ORF1a:J230T,ORF1a:K1383R,ORF1b:E1871G,ORF1b:T2514I,ORF8:Q27*,ORF8:R52I,ORF8:Y73C,S:N501Y,S:A570D,S:D614G,S:P681H,S:T716I,S:A871T,S:S982A,S:D1118H,S:G1219C | 0    |
| hCoV-19/Mexico/CMX-INMEGEN-05-04-15/2021  | EPI_ISL_2349893 | B.1.1.7 | GRY | 36 | 881A,G28882A,G28883C,C28977T,G29715T                                                                                                                                                                                                                                                                                                                                                                                                                                                                                                                                                                                                                                                                                                                                                                                   | N:D3L,N:R203K,N:G204R,N:S235F,ORF1a:T1001,ORF1a:A1708D,ORF1a:I2230,ORF1a:A2345V,ORF1a:L3829F,ORF1b:P314L,ORF8:Q27*,ORF8:R52I,ORF8:Y73C,S:N501Y,S:A570D,S:D614G,S:P681H,S:T716I,S:A871T,S:S982A,S:D1118H                       | 54   |
| hCoV-19/Mexico/CMX-INMEGEN-05-04-170/2021 | EPI_ISL_2350004 | B.1.1.7 | GRY | 34 | 8883C,G28913A,C28977T                                                                                                                                                                                                                                                                                                                                                                                                                                                                                                                                                                                                                                                                                                                                                                                                  | N:D3L,N:R203K,N:G204R,N:S235F,ORF1a:T1001,ORF1a:A1708D,ORF1a:I2230,ORF1a:A2345V,ORF1a:L3829F,ORF1b:P314L,ORF8:Q27*,ORF8:R52I,ORF8:Y73C,S:N501Y,S:A570D,S:D614G,S:P681H,S:T716I,S:S982A,S:D1118H                               | 584  |
| hCoV-19/Mexico/CMX-INMEGEN-05-04-172/2021 | EPI_ISL_2350006 | B.1.1.7 | GRY | 36 | 81A,G28882A,G28883C,C28977T,G29715T                                                                                                                                                                                                                                                                                                                                                                                                                                                                                                                                                                                                                                                                                                                                                                                    | N:D3L,N:R203K,N:G204R,N:S235F,ORF1a:T1001,ORF1a:A1708D,ORF1a:I2230,ORF1a:M2259I,ORF1b:P218L,ORF1b:P314L,ORF8:Q27*,ORF8:R52I,ORF8:Y73C,S:N501Y,S:A570D,S:D614G,S:P681H,S:T716I,S:S982A,S:D1118H,S:G1219C                       | 310  |
| hCoV-19/Mexico/CMX-INMEGEN-05-04-177/2021 | EPI_ISL_2350009 | B.1.1.7 | GRY | 42 | A28111G,G28280C,A28281T,T28282A,G28881A,G28882A,G28883C,C28977T,C2954C,C241T,C913T,C2453T,C3037T,C3267T,C5388A,C5986T,T6954C,C9611T,C11344T,C14408T,C14676T,C15279T,T16176C,C21855T,G21974C,A23063T,C23271A,A23403G,C23604A,C23709T,T24506G,G24914C,G26774T,G27754T,C27972T,T27984C,G28048T,A28111G,G28280C,A28281T,T28282A,A28295G,G28881A,G28882A,G28883C,C28977T                                                                                                                                                                                                                                                                                                                                                                                                                                                    | M:M84I,N:D3L,N:N8D,N:R203K,N:G204R,N:S235F,ORF1a:L730F,ORF1a:T1001,ORF1a:A1708D,ORF1a:I2230T,ORF1a:L3116F,ORF1b:P314L,ORF8:Q27*,ORF8:R52I,ORF8:Y73C,S:N501Y,S:A570D,S:D614G,S:P681H,S:T716I,S:S982A,S:D1118H                  | 170  |
| hCoV-19/Mexico/CMX-INMEGEN-05-04-179/2021 | EPI_ISL_2350010 | B.1.1.7 | GRY | 37 | 282A,A28295G,G28881A,G28882A,G28883C,C28977T                                                                                                                                                                                                                                                                                                                                                                                                                                                                                                                                                                                                                                                                                                                                                                           | N:D3L,N:R203K,N:G204R,N:S235F,ORF1a:T1001,ORF1a:A1708D,ORF1a:I2230,ORF1a:M2259I,ORF1b:P218L,ORF1b:P314L,ORF8:Q27*,ORF8:R52I,ORF8:Y73C,S:N501Y,S:A570D,S:D614G,S:P681H,S:T716I,S:S982A,S:D1118H                                | 341  |
| hCoV-19/Mexico/CMX-INMEGEN-05-04-18/2021  | EPI_ISL_2349896 | B.1.1.7 | GRY | 34 | 8882A,G28883C,C28977T                                                                                                                                                                                                                                                                                                                                                                                                                                                                                                                                                                                                                                                                                                                                                                                                  | N:D3L,N:R203K,N:G204R,N:S235F,ORF1a:T1001,ORF1a:A1708D,ORF1a:I2230,ORF1a:M2259I,ORF1b:P218L,ORF1b:P314L,ORF8:Q27*,ORF8:R52I,ORF8:Y73C,S:N501Y,S:A570D,S:D614G,S:P681H,S:T716I,S:S982A,S:D1118H                                | 32   |
| hCoV-19/Mexico/CMX-INMEGEN-05-04-215/2021 | EPI_ISL_2350035 | B.1.1.7 | GR  | 37 | 8282A,G28881A,G28882A,G28883C,C28977T                                                                                                                                                                                                                                                                                                                                                                                                                                                                                                                                                                                                                                                                                                                                                                                  | N:D3L,N:R203K,N:G204R,N:S235F,ORF1a:T1001,ORF1a:A1708D,ORF1a:I2230,ORF1a:M2259I,ORF1b:P218L,ORF1b:P314L,ORF8:Q27*,ORF8:R52I,ORF8:Y73C,S:A570D,S:D614G,S:P681H,S:T716I,S:S982A,S:D1118H                                        | 272  |
| hCoV-19/Mexico/CMX-INMEGEN-05-04-217/2021 | EPI_ISL_2350036 | B.1.1.7 | GR  | 40 | 28111G,G28280C,A28281T,T28282A,G28881A,G28882A,G28883C,C28977T,C29095T                                                                                                                                                                                                                                                                                                                                                                                                                                                                                                                                                                                                                                                                                                                                                 | N:D3L,N:R203K,N:G204R,N:S235F,ORF1a:T1001,ORF1a:A1708D,ORF1a:I2230,ORF1a:Q3966R,ORF1b:P314L,ORF1b:K1383R,ORF1b:K2557R,ORF8:Q27*,ORF8:R52I,ORF8:Y73C,S:A570D,S:D614G,S:P681H,S:T716I,S:S982A,S:D1118H                          | 538  |
| hCoV-19/Mexico/CMX-INMEGEN-05-04-234/2021 | EPI_ISL_2350048 | B.1.1.7 | GRY | 39 | 4914C,C27972T,G28048T,A28111G,G28280C,A28281T,T28282A,G28881A,G28882A,G28883C,C913T,C3037T,C3267T,C5388A,C5986T,T6954C,A11983G,C14408T,C14676T,C15279T,T16176C,C23271A,A23403G,C23604A,C23709T,T24506G,G24914C,G26520T,G26202T,T6954C,C27972T,G28048T,A28111G,G28280C,A28281T,T28282A,G28881A,G28882A,G28883C,C28977T                                                                                                                                                                                                                                                                                                                                                                                                                                                                                                  | N:D3L,N:R203K,N:G204R,N:S235F,ORF1a:T1001,ORF1a:A1708D,ORF1a:I2230,ORF1b:P314L,ORF8:Q27*,ORF8:R52I,ORF8:Y73C,S:A570D,S:D614G,S:P681H,S:T716I,S:S982A,S:D1118H                                                                 | 90   |
| hCoV-19/Mexico/CMX-INMEGEN-05-04-300/2021 | EPI_ISL_2350092 | B.1.1.7 | G   | 26 | G28280C,A28281T,T28282A,C28977T,G29715T                                                                                                                                                                                                                                                                                                                                                                                                                                                                                                                                                                                                                                                                                                                                                                                | N:D3L,N:R203K,N:G204R,N:S235F,ORF1a:T1001,ORF1a:I2230,ORF1a:J230T,ORF1a:K1383R,ORF1b:E1871G,ORF1b:T2514I,ORF8:Q27*,ORF8:R52I,ORF8:Y73C,S:A570D,S:D614G,S:P681H,S:T716I,S:S982A,S:D1118H                                       | 3122 |
| hCoV-19/Mexico/CMX-INMEGEN-05-04-321/2021 | EPI_ISL_2350105 | B.1.1.7 | GR  | 41 | 8048T,A28111G,G28280C,A28281T,T28282A,G28881A,G28882A,G28883C,C28977T,C29095T                                                                                                                                                                                                                                                                                                                                                                                                                                                                                                                                                                                                                                                                                                                                          | N:D3L,N:R203K,N:G204R,N:S235F,ORF1a:T1001,ORF1a:A1708D,ORF1a:I2230,ORF1a:Q3966R,ORF1b:P314L,ORF1b:K1383R,ORF1b:K2557R,ORF8:Q27*,ORF8:R52I,ORF8:Y73C,S:A570D,S:D614G,S:P681H,S:T716I,S:S982A,S:D1118H                          | 2598 |
| hCoV-19/Mexico/CMX-INMEGEN-05-04-364/2021 | EPI_ISL_2350131 | B.1.1.7 | GRY | 33 | 4914C,C27972T,G28048T,A28111G,G28280C,A28281T,T28282A,G28881A,G28882A,G28883C,C241T,C913T,C2453T,C3037T,C3267T,C5388A,C5986T,T6954C,C9611T,C11344T,C14408T,C14676T,C15279T,T16176C,C18555T,C21639A,A23063T,C23271A,A23403G,C23604A,C23709T,C24374T,T24506G,G24914C,C27972T,G28048T,A28111G,G28280C,A28281T,T28282A,G28881A,G28882A,G28883C,C241T,C913T,C2453T,C3037T,C3267T,C5388A,C5986T,T6954C,C9611T,C11344T,C14408T,C14676T,C15279T,T16176C,C18555T,G21974C,A23063T,C23271A,A23403G,C23604A,C23709T,T24506G,G24914C,G26520T,G26202T,T6954C,C27972T,G28048T,A28111G,G28280C,A28281T,T28282A,G28881A,G28882A,G28883C,C28977T                                                                                                                                                                                         | N:D3L,N:R203K,N:G204R,N:S235F,ORF1a:T1001,ORF1a:A1708D,ORF1a:I2230,ORF1a:Q3966R,ORF1b:P314L,ORF1b:K1383R,ORF1b:K2557R,ORF8:Q27*,ORF8:R52I,ORF8:Y73C,S:A570D,S:D614G,S:P681H,S:T716I,S:S982A,S:D1118H                          | 24   |
| hCoV-19/Mexico/CMX-INMEGEN-05-04-40/2021  | EPI_ISL_2349916 | B.1.1.7 | GRY | 23 | 8977T                                                                                                                                                                                                                                                                                                                                                                                                                                                                                                                                                                                                                                                                                                                                                                                                                  | N:D3L,N:R203K,N:G204R,N:S235F,ORF1a:T1001,ORF1a:A1708D,ORF1a:I2230,ORF1a:J230T,ORF1a:K1383R,ORF1b:E1871G,ORF1b:T2514I,ORF8:Q27*,ORF8:R52I,ORF8:Y73C,S:A570D,S:D614G,S:P681H,S:T716I,S:S982A,S:D1118H                          | 274  |
| hCoV-19/Mexico/CMX-INMEGEN-05-04-64/2021  | EPI_ISL_2349930 | B.1.1.7 | GR  | 32 | 7972T,G28048T,A28111G,G28280C,A28281T,T28282A,G28881A,G28882A,G28883C,C28977T,C2110T,C913T,C3037T,C3267T,C5388A,A12162G,C14408T,C14676T,C15279T,T16176C,A17615G,C18747T,C20844T,A21137G,C23271A,A23403G,C23604A,C23709T,T24506G,G24914C,G25135T,C26110T,C26521T,G26828T,C27972T,G28048T,A28111G,G28280C,A28281T,T28282A,G28881A,G28882A,G28883C,C28977T,C29095T                                                                                                                                                                                                                                                                                                                                                                                                                                                        | N:D3L,N:R203K,N:G204R,N:S235F,ORF1a:T1001,ORF1a:A1708D,ORF1a:I2230,ORF1a:M2259I,ORF1b:P218L,ORF1b:P314L,ORF8:Q27*,ORF8:R52I,ORF8:Y73C,S:A570D,S:D614G,S:P681H,S:T716I,S:S982A,S:D1118H                                        | 6    |
| hCoV-19/Mexico/CMX-INMEGEN-05-04-75/2021  | EPI_ISL_2349939 | B.1.1.7 | G   | 30 | T626828T,C27972T,G28048T,A28111G,G28280C,A28281T,T28282A,C28977T,C29095T                                                                                                                                                                                                                                                                                                                                                                                                                                                                                                                                                                                                                                                                                                                                               | N:D3L,N:R203K,N:G204R,N:S235F,ORF1a:T1001,ORF1a:A1708D,ORF1a:I2230,ORF1a:K1383R,ORF1b:E1871G,ORF1b:T2514I,ORF8:Q27*,ORF8:R52I,ORF8:Y73C,S:A570D,S:D614G,S:P681H,S:T716I,S:S982A,S:D1118H                                      | 8667 |
| hCoV-19/Mexico/CMX-INMEGEN-05-04-78/2021  | EPI_ISL_2349941 | B.1.1.7 | GRY | 40 | A28111G,G28280C,A28281T,T28282A,G28881A,G28882A,G28883C,C28977T                                                                                                                                                                                                                                                                                                                                                                                                                                                                                                                                                                                                                                                                                                                                                        | N:D3L,N:R203K,N:G204R,N:S235F,ORF1a:T1001,ORF1a:A1708D,ORF1a:I2230,ORF1a:M2259I,ORF1b:T17I,ORF1b:P218L,ORF1b:P314L,ORF8:Q27*,ORF8:R52I,ORF8:Y73C,S:N501Y,S:A570D,S:D614G,S:P681H,S:T716I,S:S982A,S:D1118H                     | 495  |

|                                           |                 |         |     |    |                                                                                                                                                                                                                                                                                                                                                                                                                                                                                                                                 |                                                                                                                                                                                                                                                                                              |   |      |
|-------------------------------------------|-----------------|---------|-----|----|---------------------------------------------------------------------------------------------------------------------------------------------------------------------------------------------------------------------------------------------------------------------------------------------------------------------------------------------------------------------------------------------------------------------------------------------------------------------------------------------------------------------------------|----------------------------------------------------------------------------------------------------------------------------------------------------------------------------------------------------------------------------------------------------------------------------------------------|---|------|
| hCoV-19/Mexico/CMX-INMEGEN-05-04-80/2021  | EPI_ISL_2349943 | B.1.1.7 | GRY | 35 | C241T,C913T,C2453T,C3037T,C3267T,C5388A,C5986T,T6954C,C1966T,C9611T,C14408T,C14676T,C15279T,T16176C,C21855T,G21974C,A23063T,C23271A,A23403G,C23604A,C23709T,C24198T,T24506G,G24914C,C27643T,C27972T,G28048T,A28111G,G28280A,A28295G,C28728T,G2881A,G28882A,G28883C,C28977T                                                                                                                                                                                                                                                      | N:N8D,N:A152V,N:R203K,N:G204R,N:S235F,ORF1a:L730F,ORF1a:T1001I,ORF1a:I2230T,ORF1a:I2230T,ORF1a:L316F,ORF1b:P314L,ORF7a:P84S,ORF8:Q27*,ORF8:R52I,ORF8:Y73C,S:N501Y,S:A570D,S:D614G,S:P681H,S:T716I,S:S982A,S:D1118H                                                                           | 6 | 394  |
| hCoV-19/Mexico/CMX-INMEGEN-05-05-111/2021 | EPI_ISL_2881801 | B.1.1.7 | GR  | 32 | C241T,C913T,C3037T,C3267T,C5388A,C5986T,C6196T,T6954C,A8848G,C14408T,C14676T,C15279T,T16176C,T19624C,C23271A,A23403G,C23604A,C23709T,T24506G,G24914C,G25217T,C27972T,G28048T,A28111G,G28280A,A28281T,T28282A,G28881A,G28882A,G28883C,C28977T,G2882A,G28883C,C28977T                                                                                                                                                                                                                                                             | N:D3L,N:R203K,N:G204R,N:S235F,ORF1a:T1001I,ORF1a:A1708D,ORF1a:I2230T,ORF1b:P314L,ORF8:Q27*,ORF8:R52I,ORF8:Y73C,S:A570D,S:D614G,S:P681H,S:T716I,S:S982A,S:D1118H,S:G1219C                                                                                                                     | 6 | 626  |
| hCoV-19/Mexico/CMX-INMEGEN-05-05-130/2021 | EPI_ISL_2444478 | B.1.1.7 | GRY | 35 | 8882A,G28883C,C28977T,G29715T                                                                                                                                                                                                                                                                                                                                                                                                                                                                                                   | N:D3L,N:R203K,N:G204R,N:S235F,ORF1a:T1001I,ORF1a:A1708D,ORF1a:I2230T,ORF1a:P3624L,ORF1b:P314L,ORF3a:T271A,ORF8:Q27*,ORF8:R52I,ORF8:Y73C,S:N501Y,S:A570D,S:D614G,S:P681H,S:T716I,S:A8455,S:S982A,S:D1118H                                                                                     | 6 | 2    |
| hCoV-19/Mexico/CMX-INMEGEN-05-05-15/2021  | EPI_ISL_2444407 | B.1.1.7 | GRY | 34 | C241T,C913T,C3037T,C3267T,A3492G,C4331T,C5388A,C5986T,T6954C,C14408T,C14676T,C15279T,T16176C,C18555T,C21639A,A23063T,C23271A,A23403G,C23604A,C23709T,C24374T,T24506G,G24914C,C27972T,G28048T,A28111G,G28280A,C28281T,T28282A,G28881A,G28882A,G2882A,C241T,T899C,C913T,C3037T,C3267T,C5388A,C5986T,T6954C,T8815C,G12070T,C14408T,C14676T,T15096C,C15279T,T16176C,T16476C,G18907T,C19290T,A23063T,C23271A,A23403G,C23604A,C23709T,T24506G,G24914C,C27972T,G28048T,A28095T,A28111G,G28280A,A28281T,T28282A,G28881A,G28883C,C28977T | N:D3L,N:R203K,N:G204R,N:S235F,ORF1a:T1001I,ORF1a:A1708D,ORF1a:I2230T,ORF1b:P314L,ORF8:Q27*,ORF8:R52I,ORF8:Y73C,S:P26H,S:N210Y,S:A570D,S:D614G,S:P681H,S:T716I,S:L938F,S:S982A,S:D1118H                                                                                                       | 6 | 2    |
| hCoV-19/Mexico/CMX-INMEGEN-05-05-155/2021 | EPI_ISL_2444493 | B.1.1.7 | GRY | 36 | 82A,G28881A,G28882A,G28883C,C28977T                                                                                                                                                                                                                                                                                                                                                                                                                                                                                             | N:D3L,N:R203K,N:G204R,N:S235F,ORF1a:T1001I,ORF1a:A1708D,ORF1a:I2230T,ORF1b:P314L,ORF1b:I814F,ORF8:Q27*,ORF8:R52I,ORF8:Y73C,S:P26H,S:N210Y,S:A570D,S:D614G,S:P681H,S:T716I,S:L938F,S:S982A,S:D1118H                                                                                           | 6 | 2    |
| hCoV-19/Mexico/CMX-INMEGEN-05-05-165/2021 | EPI_ISL_2881805 | B.1.1.7 | GRY | 38 | C241T,C913T,G1957A,A2276G,G2527A,C3037T,A3094T,C3267T,G4136T,C5388A,C5986T,T6954C,C11704T,C14408T,C14676T,C15279T,T16176C,G19542T,G22841A,A23063T,C23271A,A23403G,C23604A,C23709T,T24506G,G24914C,G25954T,C27972T,G28048T,A28111G,G28280A,A28282A,C28744T,G28881A,G28882A,G28883C,C28977T                                                                                                                                                                                                                                       | N:D3L,N:R203K,N:G204R,N:S235F,ORF1a:I671V,ORF1a:T1001I,ORF1a:V1291F,ORF1a:A1708D,ORF1a:I2230T,ORF1b:P314L,ORF1b:M2025I,ORF8:Q27*,ORF8:R52I,ORF8:Y73C,S:D427C,S:D427C,S:D427C,S:N501Y,S:A570D,S:D614G,S:P681H,S:T716I,S:S982A,S:D1118H                                                        | 6 | 216  |
| hCoV-19/Mexico/CMX-INMEGEN-05-05-167/2021 | EPI_ISL_2444501 | B.1.1.7 | GRY | 34 | T,G24914C,C27972T,G28048T,A28095T,A28111G,G28280A,C28281T,T28282A,G28881A,G28882A,C241T,C913T,C2110T,C3037T,C3267T,T5278C,C5388A,C5986T,T6954C,G7042T,A8879G,C14120T,C14408T,C14676T,C15279T,T16176C,A23063T,C23271A,A23403G,C23604A,C23709T,G24415T,G24914C,C27972T,G28048T,A28095T,A28111G,G28280A,A28281T,T28282A,G28881A,G28882A,G28883C,C28977T                                                                                                                                                                            | N:D3L,N:R203K,N:G204R,N:S235F,ORF1a:T1001I,ORF1a:A1708D,ORF1a:I2230T,ORF1a:M2259I,ORF1a:T2872A,ORF1b:P218L,ORF1b:P314L,ORF8:Q27*,ORF8:R52I,ORF8:K68*,ORF8:Y73C,S:N501Y,S:A570D,S:D614G,S:P681H,S:T716I,S:D8R52I,ORF8:K68*,ORF8:Y73C,S:N501Y,S:A570D,S:D614G,S:P681H,S:T716I,S:S982A,S:D1118H | 6 | 169  |
| hCoV-19/Mexico/CMX-INMEGEN-05-05-182/2021 | EPI_ISL_2444508 | B.1.1.7 | GRY | 35 | 1A,G28882A,G28883C,C28977T                                                                                                                                                                                                                                                                                                                                                                                                                                                                                                      | N:D3L,N:R203K,N:G204R,N:S235F,ORF1a:T1001I,ORF1a:A1708D,ORF1a:I2230T,ORF1b:P314L,ORF8:Q27*,ORF8:R52I,ORF8:Y73C,S:P26H,S:70D,S:D614G,S:P681H,S:T716I,S:L938F,S:S982A,S:D1118H                                                                                                                 | 6 | 16   |
| hCoV-19/Mexico/CMX-INMEGEN-05-05-19/2021  | EPI_ISL_2444411 | B.1.1.7 | GR  | 32 | 27972T,G28048T,A28111G,G28280A,A28281T,T28282A,G28881A,G28882A,G28883C,C28977T,C203T,C241T,C913T,G1820A,C3037T,G3251T,C3267T,C5388A,C5986T,C6525T,T6954C,G9526T,A12162G,C14408T,C14676T,C15279T,T16176C,A17615G,T19363C,A21137G,C23248T,C23271A,A23403G,C23604A,C23709T,T24506G,G24914C,G25135T,C27972T,G28048T,A28111G,G28280A,C28281T,T28282A,G28881A,G28882A,G28883C,C28977T                                                                                                                                                 | N:D3L,N:R203K,N:G204R,N:S235F,ORF1a:G5195,ORF1a:D996V,ORF1a:T1001I,ORF1a:A1708D,ORF1a:T2087I,ORF1a:I2230T,ORF1a:M3087I,ORF1a:Q3966Q,ORF1b:P314L,ORF1b:K1383R,ORF1b:K2557R,ORF8:Q27*,ORF8:R52I,ORF8:Y73C,S:A570D,S:D614G,S:P681H,S:T716I,S:L938F,S:S982A,S:D1118H,S:K1191N                    | 6 | 1468 |
| hCoV-19/Mexico/CMX-INMEGEN-05-05-206/2021 | EPI_ISL_2550753 | B.1.1.7 | GRY | 39 | C241T,C913T,C3037T,C3267T,C5388A,C5986T,T6954C,A8848G,C14408T,C14676T,C15279T,T16176C,G19816T,A23063T,C23271A,A23403G,C23604A,C23709T,T24506G,G24914C,G25217T,G26727T,T27285C,C27972T,G28048T,A28111G,G28280A,A28281T,T28282A,G28881A,G28882A,G28883C,C28977T                                                                                                                                                                                                                                                                   | M:A695,N:D3L,N:R203K,N:G204R,N:S235F,ORF1a:T1001I,ORF1a:A1708D,ORF1a:I2230T,ORF1b:P314L,ORF1b:V2117L,ORF8:Q27*,ORF8:R52I,ORF8:Y73C,S:N501Y,S:A570D,S:D614G,S:P681H,S:T716I,S:S982A,S:D1118H,S:G1219C                                                                                         | 6 | 0    |
| hCoV-19/Mexico/CMX-INMEGEN-05-05-21/2021  | EPI_ISL_2444412 | B.1.1.7 | GRY | 35 | 8882A,G28883C,C28977T,G29715T                                                                                                                                                                                                                                                                                                                                                                                                                                                                                                   | N:D3L,N:R203K,N:G204R,N:S235F,ORF1a:T1001I,ORF1a:A1708D,ORF1a:I2230T,ORF1b:P314L,ORF8:Q27*,ORF8:R52I,ORF8:Y73C,S:P26H,S:70D,S:D614G,S:P681H,S:T716I,S:L938F,S:S982A,S:D1118H                                                                                                                 | 6 | 126  |
| hCoV-19/Mexico/CMX-INMEGEN-05-05-232/2021 | EPI_ISL_2444538 | B.1.1.7 | GRY | 34 | C241T,C913T,C2453T,C3037T,C3267T,C5388A,C5986T,A6575T,T6954C,A7432G,C9611T,C14408T,C14676T,C15279T,T16176C,G19999T,C20930T,C21855T,G21974C,C23271A,A23403G,C23604A,C23709T,T24506G,G24914C,C27972T,G28048T,A28111G,G28280A,A28281T,T28282A,A28295G,G28881A,G28882A,G28883C,C28977T                                                                                                                                                                                                                                              | N:D3L,N:R203K,N:G204R,N:S235F,ORF1a:L730F,ORF1a:T1001I,ORF1a:A1708D,ORF1a:S2104C,ORF1a:I2230T,ORF1a:L3116F,ORF1b:P314L,ORF1b:V2178F,ORF1b:T2488M,ORF8:Q27*,ORF8:R52I,ORF8:Y73C,S:S982A,S:D138H,S:A570D,S:D614G,S:P681H,S:T716I,S:S982A,S:D1118H                                              | 6 | 482  |
| hCoV-19/Mexico/CMX-INMEGEN-05-05-280/2021 | EPI_ISL_2444559 | B.1.1.7 | GRY | 37 | 81T,T28282A,G28881A,G28882A,G28883C,C28977T                                                                                                                                                                                                                                                                                                                                                                                                                                                                                     | N:D3L,N:R203K,N:G204R,N:S235F,ORF1a:S212P,ORF1a:T1001I,ORF1a:A1708D,ORF1a:I2230T,ORF1b:P314L,ORF1b:I814F,ORF8:Q27*,ORF8:R52I,ORF8:Y73C,S:P26H,S:N210Y,S:A570D,S:D614G,S:P681H,S:T716I,S:L938F,S:S982A,S:D1118H                                                                               | 6 | 381  |
| hCoV-19/Mexico/CMX-INMEGEN-05-05-29/2021  | EPI_ISL_2444417 | B.1.1.7 | GRY | 41 | A28095T,A28111G,G28280A,A28281T,T28282A,G28881A,G28882A,G28883C,C28977T                                                                                                                                                                                                                                                                                                                                                                                                                                                         | N:D3L,N:R203K,N:G204R,N:S235F,ORF1a:T1001I,ORF1a:A1708D,ORF1a:I2230T,ORF1a:P3613L,ORF1a:I4182F,ORF1b:P218L,ORF1b:P314L,ORF8:Q27*,ORF8:R52I,ORF8:K68*,ORF8:Y73C,S:N501Y,S:A570D,S:D614G,S:P681H,S:T716I,S:S982A,S:D1118H                                                                      | 6 | 0    |
| hCoV-19/Mexico/CMX-INMEGEN-05-05-92/2021  | EPI_ISL_2444459 | B.1.1.7 | GR  | 38 | 280C,A28281T,T28282A,G28881A,G28882A,G28883C,C28977T                                                                                                                                                                                                                                                                                                                                                                                                                                                                            | N:D3L,N:R203K,N:G204R,N:S235F,ORF1a:T1001I,ORF1a:A1708D,ORF1a:I2230T,ORF1b:P314L,ORF1b:V2117L,ORF8:Q27*,ORF8:R52I,ORF8:Y73C,S:P26H,S:70D,S:D614G,S:P681H,S:T716I,S:L938F,S:S982A,S:D1118H                                                                                                    | 6 | 1421 |
| hCoV-19/Mexico/CMX-INMEGEN-05-05-97/2021  | EPI_ISL_2444461 | B.1.1.7 | GR  | 32 | 7972T,G28048T,A28111G,G28280A,A28281T,T28282A,G28881A,G28882A,G28883C,C28977T,C241T,C913T,C3037T,C3267T,C5388A,C5986T,C6196T,T6954C,A8848G,C14408T,C14676T,C15279T,T16176C,C18555T,C21639A,C23271A,A23403G,C23604A,C23709T,C24374T,T24506G,G24914C,C27972T,G28048T,A28111G,G28280A,A28281T,T28282A,G28881A,G28882A,G28883C,C28977T                                                                                                                                                                                              | M:A695,N:D3L,N:R203K,N:G204R,N:S235F,ORF1a:T1001I,ORF1a:A1708D,ORF1a:I2230T,ORF1b:P314L,ORF1b:V2117L,ORF8:Q27*,ORF8:R52I,ORF8:Y73C,S:N501Y,S:A570D,S:D614G,S:P681H,S:T716I,S:L938F,S:S982A,S:D1118H,S:G1219C                                                                                 | 6 | 331  |
| hCoV-19/Mexico/CMX-INMEGEN-05-06-172/2021 | EPI_ISL_2603665 | B.1.1.7 | GRY | 35 | 8882A,G28883C,C28977T,G29715T                                                                                                                                                                                                                                                                                                                                                                                                                                                                                                   | M:A695,N:D3L,N:R203K,N:G204R,N:S235F,ORF1a:T1001I,ORF1a:A1708D,ORF1a:I2230T,ORF1b:P314L,ORF1b:V2117L,ORF8:Q27*,ORF8:R52I,ORF8:Y73C,S:N501Y,S:A570D,S:D614G,S:P681H,S:T716I,S:L938F,S:S982A,S:D1118H,S:G1219C                                                                                 | 6 | 84   |
| hCoV-19/Mexico/CMX-INMEGEN-05-06-184/2021 | EPI_ISL_2603675 | B.1.1.7 | GRY | 38 | A28281T,T28282A,G28881A,G28882A,G28883C,C28977T                                                                                                                                                                                                                                                                                                                                                                                                                                                                                 | M:A2V,N:D3L,N:R203K,N:G204R,N:S235F,ORF1a:T1001I,ORF1a:I209D,ORF1a:A1708D,ORF1a:I2230T,ORF1a:P3359V,ORF1b:P314L,ORF1b:V2117L,ORF8:Q27*,ORF8:R52I,ORF8:Y73C,S:N501Y,S:A570D,S:D614G,S:P681H,S:T716I,S:S982A,S:D1118H,S:V1228L                                                                 | 6 | 497  |
| hCoV-19/Mexico/CMX-INMEGEN-05-06-185/2021 | EPI_ISL_2603676 | B.1.1.7 | GRY | 36 | 881A,G28882A,G28883C,C28977T,G29715T                                                                                                                                                                                                                                                                                                                                                                                                                                                                                            | N:D3L,N:R203K,N:G204R,N:S235F,ORF1a:T753I,ORF1a:T1001I,ORF1a:A1708D,ORF1a:I2230T,ORF1b:P314L,ORF1b:V2117L,ORF8:Q27*,ORF8:R52I,ORF8:Y73C,S:N501Y,S:A570D,S:D614G,S:P681H,S:T716I,S:L938F,S:S982A,S:D1118H,S:G1219C                                                                            | 6 | 179  |

|                                           |                 |         |     |    |                                                                                                                                                                                                                                                                                                                    |                                                                                                                                                                                                                                                                                                                                                                                                                                                                                                      |      |
|-------------------------------------------|-----------------|---------|-----|----|--------------------------------------------------------------------------------------------------------------------------------------------------------------------------------------------------------------------------------------------------------------------------------------------------------------------|------------------------------------------------------------------------------------------------------------------------------------------------------------------------------------------------------------------------------------------------------------------------------------------------------------------------------------------------------------------------------------------------------------------------------------------------------------------------------------------------------|------|
| hCoV-19/Mexico/CMX-INMEGEN-05-06-187/2021 | EPI_ISL_2603677 | B.1.1.7 | GRY | 36 | C241T,C913T,C2061T,C3037T,C3267T,C5388A,C5986T,T6954C,C12115T,A12162G,C14408T,C14676T,C15279T,T16176C,A17615G,G20275T,G22346T,A23063T,C23271A,A23403G,C23604A,C23709T,A24322G,T24506G,G24914C,C27855A,C27972T,G28048T,A28111G,G28280C,A28281T,T28282A,G28881A,G28882A,G28883C,C28977T                              | N:D3L:N:R203K,N:G204R,N:S235F,ORF1a:A599V,ORF1a:T001,ORF1a:A1708D,ORF1a:I2230T,ORF1a:Q396R,ORF1b:P314L,ORF1b:K1383R,ORF1b:D2270T,ORF1b:L34M,ORF8:Q27*,ORF8:R52,ORF8:K68*,ORF8:Y73C,S:N501Y,SA570D,S:D614G,S:P681H,S:T716I,S:S982A,S:D1118H                                                                                                                                                                                                                                                           | 88   |
| hCoV-19/Mexico/CMX-INMEGEN-05-06-200/2021 | EPI_ISL_2603689 | B.1.1.7 | GRY | 37 | C222T,C241T,C913T,C2110T,C3037T,C3267T,C5388A,C5986T,T6954C,G7042T,C14120T,C14408T,C14676T,C15279T,T16176C,C17762T,A23063T,C23271A,A23403G,C23604A,C23709T,T24506G,G24914C,T25180C,G25641T,C25672T,C27972T,G28048T,A28095T,A28111G,G28280C,A28281T,T28282A,G28881A,G28882A,G28883C,C28977T                         | N:D3L:N:R203K,N:G204R,N:S235F,ORF1a:T001,ORF1a:A1708D,ORF1a:I2230T,ORF1a:M2259I,ORF1b:P218L,ORF1b:P314L,ORF1b:A1432V,ORF3a:L83F,ORF3a:I94F,ORF8:Q27*,ORF8:R52,ORF8:K68*,ORF8:Y73C,S:N501Y,SA570D,S:D614G,S:P681H,S:T716I,S:S982A,S:D1118H                                                                                                                                                                                                                                                            | 143  |
| hCoV-19/Mexico/CMX-INMEGEN-05-06-202/2021 | EPI_ISL_2603691 | B.1.1.7 | GRY | 35 | C241T,C913T,C2453T,C3037T,C3267T,C5388A,C5934T,C5986T,T6954C,C9611T,C14408T,C14676T,C15279T,T16176C,C20946T,C21855T,G21974C,A23063T,C23271A,A23403G,C23604A,C23709T,T24506G,G24914C,C27972T,G28048T,A28111G,G28280C,A28281T,T28282A,A28295G,G2881A,G28882A,G28883C,C28977T                                         | N:D3L:N:N8D,N:R203K,N:G204R,N:S235F,ORF1a:L730F,ORF1a:T1001,ORF1a:A1708D,ORF1a:T1890I,ORF1a:I2230T,ORF1a:I3116F,ORF1b:P314L,ORF1b:Q27*,ORF8:R52,ORF8:Y73C,S:S98F,S:D138H,S:N501Y,SA570D,S:D614G,S:P681H,S:T716I,S:S982A,S:D1118H                                                                                                                                                                                                                                                                     | 54   |
| hCoV-19/Mexico/CMX-INMEGEN-05-06-22/2021  | EPI_ISL_2603611 | B.1.1.7 | GR  | 34 | C241T,C913T,C3037T,C3267T,C5388A,C5986T,T6954C,C14408T,C14676T,C15279T,T16176C,C21639A,A23063T,C23271A,A23403G,C23604A,C23709T,C24374T,G24720T,G24914C,C27972T,G28048T,A28111G,G28280C,A28281T,T28282A,G28881A,G28882A,G28883C,C28977T                                                                             | M:A69S,N:D3L:N:R203K,N:G204R,N:S235F,ORF1a:T001,ORF1a:A1708D,ORF1a:I2230T,ORF1b:P314L,ORF1b:V2117L,ORF8:Q27*,ORF8:R52,ORF8:Y73C,SA570D,S:D614G,S:P681H,S:T716I,S:S982A,S:D1118H,S:G1219C                                                                                                                                                                                                                                                                                                             | 574  |
| hCoV-19/Mexico/CMX-INMEGEN-05-06-267/2021 | EPI_ISL_2603737 | B.1.1.7 | GRY | 31 | C241T,C913T,C2453T,C3037T,C3267T,C5388A,C5934T,C5986T,T6954C,C9611T,C14408T,C14676T,C15279T,T16176C,C20946T,C21855T,G21974C,A23063T,C23271A,A23403G,C23604A,C23709T,T24506G,G24914C,C27972T,G28048T,A28111G,G28280C,A28281T,T28282A,A28295G,G2881A,G28882A,G28883C,C28977T                                         | N:D3L:N:R203K,N:G204R,N:S235F,ORF1a:T001,ORF1a:I2230T,ORF1b:P314L,ORF8:Q27*,ORF8:R52,ORF8:Y73C,S:P26H,S:N501Y,SA570D,S:D614G,S:P681H,S:T716I,S:S982A,S:D1118H                                                                                                                                                                                                                                                                                                                                        | 311  |
| hCoV-19/Mexico/CMX-INMEGEN-05-06-273/2021 | EPI_ISL_2603742 | B.1.1.7 | GRY | 35 | C222T,C241T,C913T,C2110T,C3037T,C3267T,C5388A,C5986T,T6954C,G7042T,C14120T,C14408T,C14676T,C15279T,T16176C,C17762T,A23063T,C23271A,C23277T,A23403G,C23604A,C23709T,T24506G,G24914C,T25180C,G25641T,C25672T,C27972T,G28048T,A28095T,A28111G,G28280C,A28281T,T28282A,G28881A,G28882A,G28883C,C28977T                 | N:D3L:N:R203K,N:G204R,N:S235F,ORF1a:T001,ORF1a:A1708D,ORF1a:I2230T,ORF1a:M2259I,ORF1b:P218L,ORF1b:P314L,ORF1b:A1432V,ORF3a:L83F,ORF3a:I94F,ORF8:Q27*,ORF8:R52,ORF8:K68*,ORF8:Y73C,S:N501Y,SA570D,S:D614G,S:P681H,S:T716I,S:S982A,S:D1118H                                                                                                                                                                                                                                                            | 0    |
| hCoV-19/Mexico/CMX-INMEGEN-05-06-279/2021 | EPI_ISL_2603748 | B.1.1.7 | GRY | 38 | C241T,C913T,C1201T,C3037T,C3267T,C5388A,C5986T,C6196T,T6954C,A8848G,C14408T,C14676T,C15279T,T16176C,G19816T,C23271A,A23403G,C23604A,C23709T,T24506G,G24914C,G25217T,G26727T,T2785C,C27972T,G28048T,A28111G,G28280C,A28281T,T28282A,G28881A,G28882A,G28883C,C28977T                                                 | M:A69S,N:D3L:N:R203K,N:G204R,N:S235F,ORF1a:T001,ORF1a:A1708D,ORF1a:I2230T,ORF1b:P314L,ORF1b:V2117L,ORF8:Q27*,ORF8:R52,ORF8:Y73C,SA570D,S:D614G,S:P681H,S:T716I,S:S982A,S:D1118H                                                                                                                                                                                                                                                                                                                      | 0    |
| hCoV-19/Mexico/CMX-INMEGEN-05-06-28/2021  | EPI_ISL_2603615 | B.1.1.7 | GR  | 35 | C241T,C913T,C2110T,G3004T,C3037T,C3267T,C5388A,C5986T,T6954C,G7042T,C9996T,C10525T,C10789T,C14120T,C14408T,C14676T,C15279T,T16176C,A23063T,C23271A,A23403G,G23593T,C23604A,C23709T,T24506G,G24914C,C25844T,C26110T,C26735T,C27972T,G28048T,A28095T,A28111G,G28280C,A28281T,T28282A,G28881A,G28882A,G28883C,C28977T | N:D3L:N:R203K,N:G204R,N:S235F,ORF1a:E913D,ORF1a:T001,ORF1a:A1708D,ORF1a:I2230T,ORF1a:M2259I,ORF1b:P218L,ORF1b:P314L,ORF1b:A1432V,ORF3a:L83F,ORF3a:I94F,ORF8:Q27*,ORF8:R52,ORF8:K68*,ORF8:Y73C,S:N501Y,SA570D,S:D614G,S:P681H,S:T716I,S:S982A,S:D1118H                                                                                                                                                                                                                                                | 679  |
| hCoV-19/Mexico/CMX-INMEGEN-05-06-280/2021 | EPI_ISL_2603749 | B.1.1.7 | GRY | 41 | T,A28111G,G28280C,A28281T,T28282A,G28804G,G28881A,G28882A,G28883C,C28977T                                                                                                                                                                                                                                          | N:D3L:N:R203K,N:G204R,N:S235F,ORF1a:T001,ORF1a:A1708D,ORF1a:I2230T,ORF1a:M2259I,ORF1b:P218L,ORF1b:P314L,ORF1b:A1432V,ORF3a:L83F,ORF3a:I94F,ORF8:Q27*,ORF8:R52,ORF8:K68*,ORF8:Y73C,S:N501Y,SA570D,S:D614G,S:P681H,S:T716I,S:S982A,S:D1118H                                                                                                                                                                                                                                                            | 224  |
| hCoV-19/Mexico/CMX-INMEGEN-05-06-281/2021 | EPI_ISL_2603750 | B.1.1.7 | GRY | 39 | C241T,C913T,C3037T,C3267T,C3695T,C4683T,C5388A,C5986T,T6954C,C7749T,A12162G,C14408T,C14676T,C15279T,C15720T,T16176C,C16985T,A17615G,A21137G,A23063T,C23271A,A23403G,C23604A,C23709T,T24506G,G24914C,G24959T,G25135T,C26110T,C27972T,G28048T,A28111G,G28280C,A28281T,T28282A,G28881A,G28882A,G28883C,C28977T        | N:D3L:N:R203K,N:G204R,N:S235F,ORF1a:T001,ORF1a:A1708D,ORF1a:I2230T,ORF1a:T495I,ORF1a:Q396R,ORF1b:P314L,ORF1b:T173T,ORF1b:K1383R,ORF1b:K2557R,ORF3a:P240S,ORF8:Q27*,ORF8:R52,ORF8:Y73C,S:N501Y,SA570D,S:D614G,S:P681H,S:T716I,S:S982A,S:D1118H,S:V1133F,S:N:Q7K,N:N8D,N:R203K,N:G204R,N:S235F,ORF1a:L730F,ORF1a:T001,ORF1a:A1708D,ORF1a:M1769V,ORF1a:I2230T,ORF1a:I3116F,ORF1b:P314L,ORF1b:M1573I,*ORF8:R52,ORF8:Y73C,S:S98F,S:D138H,S:N501Y,SA570D,S:D614G,S:P681H,S:T716I,S:S982A,S:D1118H,S:M1237I | 194  |
| hCoV-19/Mexico/CMX-INMEGEN-05-06-286/2021 | EPI_ISL_2603754 | B.1.1.7 | GRY | 35 | 1A,G28882A,G28883C,C28977T                                                                                                                                                                                                                                                                                         | N:D3L:N:R203K,N:G204R,N:S235F,ORF1a:T001,ORF1a:A1708D,ORF1a:I2230T,ORF1b:P314L,ORF8:Q27*,ORF8:R52,ORF8:Y73C,S:P26H,S:N501Y,SA570D,S:D614G,S:P681H,S:T716I,S:S982A,S:D1118H                                                                                                                                                                                                                                                                                                                           | 0    |
| hCoV-19/Mexico/CMX-INMEGEN-05-06-296/2021 | EPI_ISL_2603760 | B.1.1.7 | GRY | 34 | C241T,C913T,C3037T,C3267T,A3492G,C4331T,C5388A,C5986T,T6954C,C14408T,C14676T,C15279T,T16176C,C18555T,C21639A,A23063T,C23271A,A23403G,C23604A,C23709T,T24506G,G24914C,C27855A,C27972T,G28048T,A28111G,G28280C,A28281T,T28282A,G28881A,G28882A,G28883C,C28977T                                                       | N:D3L:N:R203K,N:G204R,N:S235F,ORF1a:E913D,ORF1a:T001,ORF1a:A1708D,ORF1a:I2230T,ORF1b:P314L,ORF8:Q27*,ORF8:R52,ORF8:Y73C,S:P26H,S:N501Y,SA570D,S:D614G,S:P681H,S:T716I,S:S982A,S:D1118H                                                                                                                                                                                                                                                                                                               | 0    |
| hCoV-19/Mexico/CMX-INMEGEN-05-06-298/2021 | EPI_ISL_2603762 | B.1.1.7 | GRY | 37 | T28282A,G28881A,G28882A,G28883C,C28977T                                                                                                                                                                                                                                                                            | N:D3L:N:R203K,N:G204R,N:S235F,ORF1a:T001,ORF1a:A1708D,ORF1a:I2230T,ORF1a:M2259I,ORF1b:P218L,ORF1b:P314L,ORF1b:A1432V,ORF3a:L83F,ORF3a:I94F,ORF8:Q27*,ORF8:R52,ORF8:K68*,ORF8:Y73C,S:N501Y,SA570D,S:D614G,S:P681H,S:T716I,S:S982A,S:D1118H                                                                                                                                                                                                                                                            | 0    |
| hCoV-19/Mexico/CMX-INMEGEN-05-06-332/2021 | EPI_ISL_2603786 | Q.3     | GR  | 38 | C241T,C913T,C3037T,C3267T,G5023A,C5388A,C5986T,C6568T,T6954C,A9529G,G10396T,C14408T,C14676T,C15279T,T16176C,A17615G,C18131T,G18984T,G20962A,G22094C,C23271A,A23403G,C23604A,C23709T,C24378T,T24506G,G24914C,G26730C,C27972T,G28048T,A28111G,G28280C,A28281T,T28282A,G28881A,G28882A,G28883C,C28977T                | M:V70L,N:D3L:N:R203K,N:G204R,N:S235F,ORF1a:T001,ORF1a:M1586I,ORF1a:A1708D,ORF1a:I2230T,ORF1b:P314L,ORF1b:K1383R,ORF1b:T1555I,ORF1b:M1839I,ORF1b:D2499N,ORF8:Q27*,ORF8:R52,ORF8:Y73C,S:D178H,SA570D,S:D614G,S:P681H,S:T716I,S:S939F,S:S982A,S:D1118H                                                                                                                                                                                                                                                  | 999  |
| hCoV-19/Mexico/CMX-INMEGEN-05-06-369/2021 | EPI_ISL_2603813 | B.1.1.7 | GRY | 38 | C241T,C913T,G1820A,C2574T,C3037T,C3267T,A3492G,C5388A,C5986T,T6954C,T9642C,C11674T,C14408T,C14676T,C15279T,T16176C,C18555T,C21639A,A23063T,C23271A,A23403G,C23604A,C23709T,C24374T,T24506G,G24914C,C27972T,G28048T,A28111G,G28280C,A28281T,T28282A,G28881A,G28882A,G28883C,C28977T                                 | N:D3L:N:R203K,N:G204R,N:S235F,ORF1a:G519S,ORF1a:T770I,ORF1a:T1001I,ORF1a:N1076S,ORF1a:A1708D,ORF1a:I2230T,ORF1a:I316F,ORF1b:P314L,ORF8:Q27*,ORF8:R52,ORF8:Y73C,S:P26H,S:N501Y,SA570D,S:D614G,S:P681H,S:T716I,S:S982A,S:D1118H                                                                                                                                                                                                                                                                        | 0    |
| hCoV-19/Mexico/CMX-INMEGEN-05-06-342/2021 | EPI_ISL_2603793 | B.1.1.7 | GRY | 37 | 2A,G28881A,G28882A,G28883C,C28977T,C29732T                                                                                                                                                                                                                                                                         | N:D3L:N:R203K,N:G204R,N:S235F,ORF1a:T001,ORF1a:D1547Y,ORF1a:A1708D,ORF1a:I2230T,ORF1a:M2259I,ORF1b:P218L,ORF1b:P314L,ORF1b:A181G,ORF8:Q27*,ORF8:R52,ORF8:K68*,ORF8:Y73C,S:N501Y,SA570D,S:D614G,S:P681H,S:T716I,S:S982A,S:D1118H                                                                                                                                                                                                                                                                      | 0    |
| hCoV-19/Mexico/CMX-INMEGEN-05-06-368/2021 | EPI_ISL_2603831 | B.1.1.7 | GRY | 38 | C241T,C913T,C1598A,C2453T,C3037T,C3267T,C5388A,C5986T,T6954C,C9611T,C14408T,C14676T,C15279T,T16176C,C21008T,C21855T,G21974C,A23063T,C23271A,A23403G,C23604A,C23709T,T24506G,G24914C,C27643T,C27972T,G28048T,A28111G,T28149A,G28280C,A28281T,T28282A,A28295G,G28881A,G28882A,G28883C,C28977T                        | N:D3L:N:N8D,N:R203K,N:G204R,N:S235F,ORF1a:G445S,ORF1a:L730F,ORF1a:T1001,ORF1a:A1708D,ORF1a:I2230T,ORF1a:I3116F,ORF1b:P314L,ORF1b:T2514I,ORF1b:P84S,ORF8:Q27*,ORF8:R52,ORF8:Y73C,ORF8:Y73C,S:S98F,S:D138H,S:N501Y,SA570D,S:D614G,S:P681H,S:T716I,S:S982A,S:D1118H                                                                                                                                                                                                                                     | 53   |
| hCoV-19/Mexico/CMX-INMEGEN-05-06-40/2021  | EPI_ISL_2603625 | B.1.1.7 | GRY | 42 | C241T,T754C,C913T,C3037T,C3267T,C5388A,C5986T,T6954C,C7299T,A13768T,C14408T,C14676T,C15096G,C15279T,T16176C,C19862T,C23271A,A23403G,C23604A,C23709T,T24506G,G24914C,C26606T,G27281T,C27972T,G28048T,A28111G,C28153T,G28280C,A28281T,T28282A,C28977T                                                                | N:D3L:N:S235F,ORF1a:T001,ORF1a:A1708D,ORF1a:I2230T,ORF1a:A2345V,ORF1b:M101I,ORF1b:P314L,ORF1b:A2132G,ORF8:W2L,ORF8:Q27*,ORF8:R52,ORF8:Y73C,S:N501Y,SA570D,S:D614G,S:P681H,S:T716I,S:S982A,S:D1118H                                                                                                                                                                                                                                                                                                   | 1111 |
| hCoV-19/Mexico/CMX-INMEGEN-05-06-47/2021  | EPI_ISL_2603630 | B.1.1.7 | G   | 43 | C,C26606T,G27281T,C27972T,G28048T,A28111G,C28153T,G28280C,A28281T,T28282A,C28977T                                                                                                                                                                                                                                  | N:D3L:N:N8D,N:R203K,N:G204R,N:S235F,ORF1a:L730F,ORF1a:P943I,ORF1a:T1001,ORF1a:A1708D,ORF1a:I2230T,ORF1a:M2796I,ORF1a:I3116F,ORF1b:P314L,ORF1b:R230I,ORF1b:A173F,ORF7a:T122L,ORF7b:M1I,ORF8:Q27*,ORF8:R52,ORF8:Y73C,S:S98F,S:D138H,S:N501Y,SA570D,S:D614G,S:P681H,S:T716I,S:S982A,S:D1118H                                                                                                                                                                                                            | 0    |
| hCoV-19/Mexico/CMX-INMEGEN-05-06-55/2021  | EPI_ISL_2603634 | B.1.1.7 | GRY | 39 | A28281T,T28282A,A28295G,G28881A,G28882A,G28883C,C28977T                                                                                                                                                                                                                                                            | M:A69S,N:D3L:N:R203K,N:G204R,N:S235F,ORF1a:T001,ORF1a:A1708D,ORF1a:I2230T,ORF1b:P314L,ORF1b:V2117L,ORF8:Q27*,ORF8:R52,ORF8:Y73C,SA570D,S:D614G,S:P681H,S:T716I,S:S982A,S:D1118H                                                                                                                                                                                                                                                                                                                      | 1563 |
| hCoV-19/Mexico/CMX-INMEGEN-05-06-61/2021  | EPI_ISL_2603636 | B.1.1.7 | GR  | 35 | 82A,G28883C,C28977T,G29715T                                                                                                                                                                                                                                                                                        |                                                                                                                                                                                                                                                                                                                                                                                                                                                                                                      |      |





|                                           |                 |         |     |    |                                                                                                                                                                                                                                                                                                                                                                                                                                                                                                                                                                                                                                        |                                                                                                                                                                                                                                                                        |    |      |
|-------------------------------------------|-----------------|---------|-----|----|----------------------------------------------------------------------------------------------------------------------------------------------------------------------------------------------------------------------------------------------------------------------------------------------------------------------------------------------------------------------------------------------------------------------------------------------------------------------------------------------------------------------------------------------------------------------------------------------------------------------------------------|------------------------------------------------------------------------------------------------------------------------------------------------------------------------------------------------------------------------------------------------------------------------|----|------|
| hCoV-19/Mexico/CMX-INMEGEN-06-02-203/2021 | EPI_ISL_2692715 | B.1.1.7 | GRY | 43 | C241T,C913T,C2110T,C2453T,G3004T,C3037T,C3267T,C5388A,C5986T,T6954C,G7042T,C9996T,C10525T,C10789T,C14120T,C14408T,C14676T,C15279T,T16176C,A23063T,C23271A,A23403G,G23593T,C23604A,C23709T,T24506G,G24914C,C25844T,C26110T,C26735T,C27389T,C27972T,G28048T,A28095T,A28111G,G28280C,A28281T,T28282A,G28881A,G28882A,G28883C241T,C913T,C1480T,C3037T,C3267T,G5023A,C5301T,C5388A,C5986T,C6568T,T6954C,G8183A,A9529G,C996T,G10396T,C14408T,C14676T,C15279T,T16176C,A17615G,G20962A,G22094C,A23063T,C23271A,A23403G,C23604A,C23709T,T24506G,G24914C,G26730C,C27972T,G28048T,A28111G,G28280C,A28281T,T28282A,G28881A,G28882A,G28883C,C28977T | N:D3L,N:R203K,N:G204R,N:S235F,ORF1a:I730F,ORF1a:E913D,ORF1a:T1001I,ORF1a:A1708D,ORF1a:I2230T,ORF1a:M2259I,ORF1a:S3244L,ORF1b:P218L,ORF1b:P314L,ORF3a:T151I,ORF3b:P240S,ORF8:Q27*,ORF8:R52I,ORF8:Y73C,S:N501Y,S:A570D,S:D614G,S:P681H,S:T716I,S:S982A,S:D1118H,S:Q1201L | 6  | 0    |
| hCoV-19/Mexico/CMX-INMEGEN-06-02-228/2021 | EPI_ISL_2692739 | Q.3     | GRY | 40 | G28048T,A28095T,A28111G,G28280C,A28281T,T28282A,G28881A,G28882A,G28883C241T,C913T,C1480T,C3037T,C3267T,G5023A,C5301T,C5388A,C5986T,C6568T,T6954C,G8183A,A9529G,C996T,G10396T,C14408T,C14676T,C15279T,T16176C,A17615G,G20962A,G22094C,A23063T,C23271A,A23403G,C23604A,C23709T,T24506G,G24914C,G26730C,C27972T,G28048T,A28111G,G28280C,A28281T,T28282A,G28881A,G28882A,G28883C,C28977T                                                                                                                                                                                                                                                   | M:V70L,N:D3L,N:R203K,N:G204R,N:S235F,ORF1a:T1001I,ORF1a:M1586I,ORF1a:I708D,ORF1a:I2230T,ORF1a:G2640R,ORF1b:P314L,ORF1b:K1383R,ORF1b:D2499N,ORF3a:V55F,ORF8:Q27*,ORF8:R52I,ORF8:Y73C,S:D1118H,S:N501Y,S:A570D,S:D614G,S:P681H,S:T716I,S:S982A,S:D1118H                  | 25 | 572  |
| hCoV-19/Mexico/CMX-INMEGEN-06-02-246/2021 | EPI_ISL_2692754 | Q.3     | GRY | 40 | C241T,C913T,C3037T,C3267T,G5023A,C5031T,C5388A,C5986T,T6954C,G8183A,A9529G,G10396T,G11365T,C14408T,C14676T,C15279T,T16176C,A17615G,G20962A,G22094C,A23063T,C23271A,A23403G,C23604A,C23709T,T24506G,G24914C,G25555T,G26730C,C27972T,G28048T,A28111G,G28280C,A28281T,T28282A,G28881A,G28882A,G28883C,C28977T                                                                                                                                                                                                                                                                                                                             | N:D3L,N:R203K,N:G204R,N:S235F,ORF1a:T1001I,ORF1a:M1076S,ORF1a:A1708D,ORF1a:I2230T,ORF1b:P314L,ORF8:Q27*,ORF8:R52I,ORF8:Y73C,S:N501Y,S:A570D,S:D614G,S:P681H,S:T716I,S:S982A,S:D1118H                                                                                   | 26 | 221  |
| hCoV-19/Mexico/CMX-INMEGEN-06-02-304/2021 | EPI_ISL_2692795 | B.1.1.7 | GRY | 34 | C241T,C913T,C3037T,C3267T,A3492G,C4331T,C5388A,C5986T,T6954C,C14408T,C14676T,C15279T,T16176C,C18555T,C21639A,A23063T,C23271A,A23403G,C23604A,C23709T,C24374T,T24506G,G24914C,C27972T,G28048T,A28111G,G28280C,A28281T,T28282A,G28881A,G28882A,G28883C,C28977T                                                                                                                                                                                                                                                                                                                                                                           | N:D3L,N:R203K,N:G204R,N:S235F,ORF1a:T1001I,ORF1a:M1076S,ORF1a:A1708D,ORF1a:I2230T,ORF1b:P314L,ORF8:Q27*,ORF8:R52I,ORF8:Y73C,S:N501Y,S:A570D,S:D614G,S:P681H,S:T716I,S:S982A,S:D1118H                                                                                   | 21 | 39   |
| hCoV-19/Mexico/CMX-INMEGEN-06-02-305/2021 | EPI_ISL_2692796 | B.1.1.7 | GR  | 35 | C241T,C913T,C3037T,C3267T,A3492G,C4331T,C5388A,C5986T,T6954C,C14408T,C14676T,C15279T,T16176C,C18555T,C21639A,A23063T,C23271A,A23403G,C23604A,C23709T,C24374T,T24506G,G24914C,C27972T,G28048T,A28111G,G28280C,A28281T,T28282A,G28881A,G28882A,G28883C,C28977T                                                                                                                                                                                                                                                                                                                                                                           | N:D3L,N:R203K,N:G204R,N:S235F,ORF1a:T1001I,ORF1a:M1076S,ORF1a:A1708D,ORF1a:I2230T,ORF1b:P314L,ORF8:Q27*,ORF8:R52I,ORF8:Y73C,S:N501Y,S:A570D,S:D614G,S:P681H,S:T716I,S:S982A,S:D1118H                                                                                   | 22 | 305  |
| hCoV-19/Mexico/CMX-INMEGEN-06-02-308/2021 | EPI_ISL_2692798 | B.1.1.7 | GRY | 37 | 882A,G28883C,C28977T,C29732T                                                                                                                                                                                                                                                                                                                                                                                                                                                                                                                                                                                                           | N:D3L,N:R203K,N:G204R,N:S235F,ORF1a:T1001I,ORF1a:M1586I,ORF1a:I708D,ORF1a:I2230T,ORF1b:P314L,ORF1b:K1383R,ORF1b:D2499N,ORF3a:V55F,ORF8:Q27*,ORF8:R52I,ORF8:Y73C,S:D1118H                                                                                               | 23 | 0    |
| hCoV-19/Mexico/CMX-INMEGEN-06-03-138/2021 | EPI_ISL_2810128 | B.1.1.7 | GRY | 35 | 282A,G28881A,G28882A,G28883C,C28977T,C29732T                                                                                                                                                                                                                                                                                                                                                                                                                                                                                                                                                                                           | N:D3L,N:R203K,N:G204R,N:S235F,ORF1a:T1001I,ORF1a:M1586I,ORF1a:I708D,ORF1a:I2230T,ORF1b:P314L,ORF1b:K1383R,ORF1b:D2499N,ORF3a:V55F,ORF8:Q27*,ORF8:R52I,ORF8:Y73C,S:D1118H                                                                                               | 21 | 13   |
| hCoV-19/Mexico/CMX-INMEGEN-06-03-147/2021 | EPI_ISL_2810137 | Q.3     | GRY | 39 | C241T,C913T,C3037T,C3267T,G5023A,C5031T,C5388A,C5986T,C6568T,T6954C,G8183A,A9529G,G10396T,C14408T,C14676T,C15279T,T16176C,A17615G,G20962A,G22094C,A23063T,C23271A,A23403G,C23604A,C23709T,T24506G,G24914C,G25555T,G26730C,C27972T,G28048T,A28111G,G28280C,A28281T,T28282A,G28881A,G28882A,G28883C,C28977T                                                                                                                                                                                                                                                                                                                              | M:V70L,N:D3L,N:R203K,N:G204R,N:S235F,ORF1a:T1001I,ORF1a:M1586I,ORF1a:I708D,ORF1a:I2230T,ORF1a:G2640R,ORF1b:P314L,ORF1b:K1383R,ORF1b:D2499N,ORF3a:V55F,ORF8:Q27*,ORF8:R52I,ORF8:Y73C,S:D1118H,S:N501Y,S:A570D,S:D614G,S:P681H,S:T716I,S:S982A,S:D1118H                  | 26 | 37   |
| hCoV-19/Mexico/CMX-INMEGEN-06-03-150/2021 | EPI_ISL_2810140 | B.1.1.7 | GRY | 36 | C241T,C913T,C3037T,C3267T,A3492G,C4331T,C5388A,C5986T,T6954C,C14408T,C14676T,C15279T,T16176C,C18555T,C21639A,A23063T,C23271A,A23403G,C23604A,C23709T,C24374T,T24506G,G24914C,C27972T,G28048T,A28111G,G28280C,A28281T,T28282A,G28881A,G28882A,G28883C,C28977T                                                                                                                                                                                                                                                                                                                                                                           | N:D3L,N:R203K,N:G204R,N:S235F,ORF1a:T1001I,ORF1a:M1076S,ORF1a:A1708D,ORF1a:I2230T,ORF1b:P314L,ORF8:Q27*,ORF8:R52I,ORF8:Y73C,S:N501Y,S:A570D,S:D614G,S:P681H,S:T716I,S:S982A,S:D1118H                                                                                   | 23 | 708  |
| hCoV-19/Mexico/CMX-INMEGEN-06-03-155/2021 | EPI_ISL_2810143 | Q.3     | GRY | 37 | 881A,G28882A,G28883C,C28977T,C29732T                                                                                                                                                                                                                                                                                                                                                                                                                                                                                                                                                                                                   | M:V70L,N:D3L,N:R203K,N:G204R,N:S235F,ORF1a:T1001I,ORF1a:M1586I,ORF1a:I708D,ORF1a:I2230T,ORF1a:G2640R,ORF1b:P314L,ORF1b:K1383R,ORF1b:D2499N,ORF3a:V55F,ORF8:Q27*,ORF8:R52I,ORF8:Y73C,S:D1118H                                                                           | 26 | 68   |
| hCoV-19/Mexico/CMX-INMEGEN-06-03-163/2021 | EPI_ISL_2810149 | B.1.1.7 | GRY | 40 | C241T,C913T,C3037T,C3267T,A3492G,C4331T,C5388A,C5986T,T6954C,C14408T,C14676T,C15279T,T16176C,C18555T,C21639A,A23063T,C23271A,A23403G,C23604A,C23709T,C24374T,T24506G,G24914C,C27972T,G28048T,A28111G,G28280C,A28281T,T28282A,G28881A,G28882A,G28883C,C28977T                                                                                                                                                                                                                                                                                                                                                                           | N:D3L,N:R203K,N:G204R,N:S235F,ORF1a:T1001I,ORF1a:M1076S,ORF1a:A1708D,ORF1a:I2230T,ORF1b:P314L,ORF8:Q27*,ORF8:R52I,ORF8:Y73C,S:N501Y,S:A570D,S:D614G,S:P681H,S:T716I,S:S982A,S:D1118H                                                                                   | 28 | 530  |
| hCoV-19/Mexico/CMX-INMEGEN-06-03-189/2021 | EPI_ISL_2842783 | B.1.1.7 | GR  | 31 | 7972T,G28048T,A28111G,G28280C,A28281T,T28282A,G28881A,G28882A,G28883C,C28977T                                                                                                                                                                                                                                                                                                                                                                                                                                                                                                                                                          | N:D3L,N:R203K,N:G204R,N:S235F,ORF1a:T1001I,ORF1a:M1076S,ORF1a:A1708D,ORF1a:I2230T,ORF1b:P314L,ORF8:Q27*,ORF8:R52I,ORF8:Y73C,S:N501Y,S:A570D,S:D614G,S:P681H,S:T716I,S:S982A,S:D1118H                                                                                   | 21 | 650  |
| hCoV-19/Mexico/CMX-INMEGEN-06-03-212/2021 | EPI_ISL_2842785 | B.1.1.7 | GRY | 42 | C241T,C913T,C3037T,C3267T,A24092G,G24914C,C25110T,C27643T,C27972T,G28048T,A28111G,G28280C,A28281T,T28282A,G28881A,G28882A,G28883C,C28977T                                                                                                                                                                                                                                                                                                                                                                                                                                                                                              | N:D3L,N:R203K,N:G204R,N:S235F,ORF1a:T1001I,ORF1a:M1076S,ORF1a:A1708D,ORF1a:I2230T,ORF1b:P314L,ORF1b:K1383R,ORF1b:D2499N,ORF3a:V55F,ORF8:Q27*,ORF8:R52I,ORF8:Y73C,S:N501Y,S:A570D,S:D614G,S:P681H,S:T716I,S:S982A,S:D1118H                                              | 26 | 49   |
| hCoV-19/Mexico/CMX-INMEGEN-06-03-228/2021 | EPI_ISL_2842803 | B.1.1.7 | GRY | 37 | 881A,G28882A,G28883C,C28977T,C29732T                                                                                                                                                                                                                                                                                                                                                                                                                                                                                                                                                                                                   | N:D3L,N:R203K,N:G204R,N:S235F,ORF1a:T1001I,ORF1a:M1076S,ORF1a:A1708D,ORF1a:I2230T,ORF1b:P314L,ORF8:Q27*,ORF8:R52I,ORF8:Y73C,S:N501Y,S:A570D,S:D614G,S:P681H,S:T716I,S:S982A,S:D1118H                                                                                   | 23 | 19   |
| hCoV-19/Mexico/CMX-INMEGEN-06-03-284/2021 | EPI_ISL_2810246 | B.1.1.7 | GRY | 36 | 882A,G28881A,G28882A,G28883C,C28977T                                                                                                                                                                                                                                                                                                                                                                                                                                                                                                                                                                                                   | N:D3L,N:R203K,N:G204R,N:S235F,ORF1a:T1001I,ORF1a:M1076S,ORF1a:A1708D,ORF1a:I2230T,ORF1b:P314L,ORF8:Q27*,ORF8:R52I,ORF8:Y73C,S:N501Y,S:A570D,S:D614G,S:P681H,S:T716I,S:S982A,S:D1118H                                                                                   | 25 | 9    |
| hCoV-19/Mexico/CMX-INMEGEN-06-03-319/2021 | EPI_ISL_2810277 | B.1.1.7 | GRY | 36 | 881A,G28882A,G28883C,C28977T,C29732T                                                                                                                                                                                                                                                                                                                                                                                                                                                                                                                                                                                                   | N:D3L,N:R203K,N:G204R,N:S235F,ORF1a:T1001I,ORF1a:M1076S,ORF1a:A1708D,ORF1a:I2230T,ORF1b:P314L,ORF1b:K1383R,ORF1b:D2499N,ORF3a:V55F,ORF8:Q27*,ORF8:R52I,ORF8:Y73C,S:N501Y,S:A570D,S:D614G,S:P681H,S:T716I,S:S982A,S:D1118H                                              | 21 | 2    |
| hCoV-19/Mexico/CMX-INMEGEN-06-03-32/2021  | EPI_ISL_2810050 | B.1.1.7 | GRY | 35 | 881A,G28882A,G28883C,C28977T                                                                                                                                                                                                                                                                                                                                                                                                                                                                                                                                                                                                           | N:D3L,N:R203K,N:G204R,N:S235F,ORF1a:T1001I,ORF1a:M1076S,ORF1a:A1708D,ORF1a:I2230T,ORF1b:P314L,ORF1b:K1383R,ORF1b:D2499N,ORF3a:V55F,ORF8:Q27*,ORF8:R52I,ORF8:Y73C,S:N501Y,S:A570D,S:D614G,S:P681H,S:T716I,S:S982A,S:D1118H                                              | 24 | 0    |
| hCoV-19/Mexico/CMX-INMEGEN-06-03-33/2021  | EPI_ISL_2810051 | B.1.1.7 | GR  | 37 | 881A,G28882A,G28883C,C28977T                                                                                                                                                                                                                                                                                                                                                                                                                                                                                                                                                                                                           | M:A69S,N:D3L,N:R203K,N:G204R,N:S235F,ORF1a:G353C,ORF1a:T1001I,ORF1a:I708D,ORF1a:I2230T,ORF1b:P314L,ORF1b:K1383R,ORF1b:D2499N,ORF3a:V55F,ORF8:Q27*,ORF8:R52I,ORF8:Y73C,S:N501Y,S:A570D,S:D614G,S:P681H,S:T716I,S:S982A,S:D1118H                                         | 22 | 1544 |
| hCoV-19/Mexico/CMX-INMEGEN-06-03-38/2021  | EPI_ISL_2810055 | B.1.1.7 | G   | 17 | 3604A,C23709T,C24034T,T24506G,G24914C,G28246G,G28280C,A28281T,T28282A,G28881A,G28882A,G28883C,C28977T                                                                                                                                                                                                                                                                                                                                                                                                                                                                                                                                  | N:D3L,N:R203K,N:G204R,N:S235F,ORF1a:T1001I,ORF1a:M1076S,ORF1a:A1708D,ORF1a:I2230T,ORF1b:P314L,ORF1b:K1383R,ORF1b:D2499N,ORF3a:V55F,ORF8:Q27*,ORF8:R52I,ORF8:Y73C,S:N501Y,S:A570D,S:D614G,S:P681H,S:T716I,S:S982A,S:D1118H                                              | 17 | 399  |
| hCoV-19/Mexico/CMX-INMEGEN-06-03-39/2021  | EPI_ISL_2810056 | B.1.1.7 | GR  | 34 | 4C,G27852T,C27972T,G28048T,A28111G,G28280C,A28281T,T28282A,G28881A,G28882A,G28883C,C28977T                                                                                                                                                                                                                                                                                                                                                                                                                                                                                                                                             | N:D3L,N:R203K,N:G204R,N:S235F,ORF1a:T1001I,ORF1a:M1076S,ORF1a:A1708D,ORF1a:I2230T,ORF1b:P314L,ORF1b:K1383R,ORF1b:D2499N,ORF3a:V55F,ORF8:Q27*,ORF8:R52I,ORF8:Y73C,S:N501Y,S:A570D,S:D614G,S:P681H,S:T716I,S:S982A,S:D1118H                                              | 19 | 546  |

|                                                 |                 |         |     |    |                                                                                                                                                                                                                                                                                                                                                                                                                                                                                                                                                                                                                    |                                                                                                                                                                                                                                                                                                                                                                                                                                                                                                                 |   |      |
|-------------------------------------------------|-----------------|---------|-----|----|--------------------------------------------------------------------------------------------------------------------------------------------------------------------------------------------------------------------------------------------------------------------------------------------------------------------------------------------------------------------------------------------------------------------------------------------------------------------------------------------------------------------------------------------------------------------------------------------------------------------|-----------------------------------------------------------------------------------------------------------------------------------------------------------------------------------------------------------------------------------------------------------------------------------------------------------------------------------------------------------------------------------------------------------------------------------------------------------------------------------------------------------------|---|------|
| hCoV-19/Mexico/CMX-INMEGEN-06-03-41/2021        | EPI_ISL_2810058 | B.1.1.7 | GRY | 38 | C241T,C913T,G1322T,C3037T,C3267T,C5388A,C5986T,C6196T,T6954C,A8848G,C14408T,C14676T,C15279T,T16176C,G18169T,T18573C,G21724T,A23063T,C23271A,A23403G,C23604A,C23709T,T24506G,G24914C,G25217T,G2727T,C27972T,G28048T,A28111G,G28280C,A28281T,T28282A,G28881A,G28882A,G28883C,C28977T,C29686T,G29715T                                                                                                                                                                                                                                                                                                                 | M:A695,N:D3L,N:R203K,N:G204R,N:S235F,ORF1a:G353C,ORF1a:T1001,ORF1a:A1708D,ORF1a:I2230T,ORF1b:P314L,ORF1b:G1568R,ORF8:Q27*,ORF8:RS51,ORF8:Y73C,S1545F,SN501Y,SA570D,S0614G,S0681H,S,T7161,S5982A,S,D118H,S,G1219C                                                                                                                                                                                                                                                                                                | 6 | 217  |
| hCoV-19/Mexico/CMX-INMEGEN-06-03-65/2021        | EPI_ISL_2810074 | B.1.1.7 | GRY | 37 | C241T,C913T,C2453T,C3037T,C3267T,C5388A,C5986T,T6954C,C9611T,C14408T,C14676T,C15279T,T16176C,C19343T,G21451A,C21855T,G21974C,A23063T,C23271A,A23403G,C23604A,C23709T,C23934T,T24506G,G24914C,G25217T,G2727T,C27972T,G28048T,A28111G,G28280C,A28281T,T28282A,A28295G,G28881A,G28882A,G28883C,C28977T                                                                                                                                                                                                                                                                                                                | N:D3L,N:N8D,N:R203K,N:G204R,N:S235F,ORF1a:L730F,ORF1a:T1001,ORF1a:A1708D,ORF1a:I2230T,ORF1a:L3116F,ORF1b:P314L,ORF1b:A1959V,ORF1b:G2662S,ORF3a:S165F,ORF8:Q27*,ORF8:RS2,ORF8:Y73C,S598F,S0138H,S,N501Y,SA570D,S0614G,S0681H,S,T7161,S5982A,S,D1118H                                                                                                                                                                                                                                                             | 6 | 203  |
| hCoV-19/Mexico/CMX-INMEGEN-06-04-107/2021       | EPI_ISL_2894237 | B.1.1.7 | GRY | 45 | C241T,C913T,T1177C,T1537G,C2110T,G2528A,C3037T,C3267T,C4296T,C5142T,C5388A,C5986T,T6954C,G7042T,C10789T,C14120T,C14408T,C14676T,C15279T,T16176C,C17375T,A19950G,C20470A,A23063T,C23271A,A23403G,C23604A,C23709T,G23749A,T24506G,G24914C,C25452T,G25471T,C27972T,G28048T,A28095T,A28111G,G28280C,A28281T,T28282A,G28881A,G28882A,C222T,C241T,C913T,C2110T,C3037T,C3267T,C5388A,C5986T,T6954C,G7042T,C14120T,C14408T,C14676T,C15279T,T16176C,C17762T,A23063T,C23271A,A23403G,C23604A,C23709T,T24506G,G24914C,T25180C,G25641T,C25672T,C27972T,G28048T,A28095T,A28111G,G28280C,A28282A,G28881A,G28882A,G28883C,C28977T | N:D3L,N:R203K,N:G204R,N:S235F,ORF1a:E755K,ORF1a:T1001,ORF1a:T1344L,ORF1a:T162G,ORF1a:A1708D,ORF1a:I2230T,ORF1a:M2259I,ORF1b:P218L,ORF1b:P314L,ORF1b:T1303I,ORF1b:Q2335K,ORF3a:D27Y,ORF8:Q27*,ORF8:RS2,ORF8:K68*,ORF8:Y73C,S,N501Y,SA570D,S0614G,S0681H,S,T7161,S5982A,S,N:D3L,N:R203K,N:G204R,N:S235F,ORF1a:T1001,ORF1a:A1708D,ORF1a:I2230T,ORF1a:M2259I,ORF1b:P218L,ORF1b:P314L,ORF1b:A1432V,ORF3a:I83F,ORF3a:I94F,ORF8:Q27*,ORF8:RS2,ORF8:K68*,ORF8:Y73C,S,N501Y,SA570D,S0614G,S0681H,S,T7161,S5982A,S,D1118H | 6 | 200  |
| hCoV-19/Mexico/CMX-INMEGEN-06-04-191/2021       | EPI_ISL_2894261 | B.1.1.7 | GRY | 37 | T1T28282A,G28881A,G28882A,G28883C,C28977T                                                                                                                                                                                                                                                                                                                                                                                                                                                                                                                                                                          | N:D3L,N:R203K,N:G204R,N:S235F,ORF1a:E37D,ORF1a:T1001,ORF1a:A1708D,ORF1a:I2230T,ORF1b:P314L,ORF1b:I649F,ORF1b:V1649F,ORF8:Q27*,ORF8:RS2,ORF8:K68*,ORF8:Y73C,S,N501Y,SA570D,S0614G,S0681H,S,T7161,S5982A,S,D1118H                                                                                                                                                                                                                                                                                                 | 6 | 0    |
| hCoV-19/Mexico/CMX-INMEGEN-06-04-208/2021       | EPI_ISL_2894273 | B.1.1.7 | GRY | 41 | 1G,G28280C,A28281T,T28282A,G28881A,G28882A,G28883C,G28884C,C28977T,A28984G                                                                                                                                                                                                                                                                                                                                                                                                                                                                                                                                         | N:N8D,N:R203K,N:G204R,N:S235F,ORF1a:L730F,ORF1a:T1001,ORF1a:A1708D,ORF1a:I2230T,ORF1a:L3116F,ORF1a:3210F,ORF1b:P314L,ORF8:Q27*,ORF8:RS2,ORF8:Y73C,S598F,S0138H,S,N501Y,SA570D,S0614G,S0681H,S,T7161,S5982A,S,N:D3L,N:R203K,N:G204R,N:S235F,ORF1a:T1001,ORF1a:A1708D,ORF1a:I2230T,ORF1a:F3624L,ORF1b:P314L,ORF8:Q27*,ORF8:RS2,ORF8:Y73C,S,SA570D,S0614G,S0681H,S,T7161,S5982A,S,D1118H                                                                                                                           | 6 | 274  |
| hCoV-19/Mexico/CMX-INMEGEN-06-04-209/2021       | EPI_ISL_2894274 | B.1.1.7 | GR  | 33 | 6G,G24914C,C25509T,C27972T,G28048T,A28111G,T28282A,A28295G,G28881A,G28882A,G28883C,C23271A,A23403G,C23604A,C23709T,T24506G,G24914C,C241T,C913T,C3037T,C3267T,C5388A,C5986T,C6196T,T6954C,A8848G,T11135C,C14408T,C14676T,C15279T,T16176C,C23271A,A23403G,C23604A,C23709T,T24506G,G24914C,C27972T,G28048T,A28111G,G28280C,A28281T,T28282A,G28881A,G28882A,G28883C,C28977T                                                                                                                                                                                                                                            | N:D3L,N:R203K,N:G204R,N:S235F,ORF1a:T1001,ORF1a:A1708D,ORF1a:I2230T,ORF1a:F3624L,ORF1b:P314L,ORF8:Q27*,ORF8:RS2,ORF8:Y73C,S,SA570D,S0614G,S0681H,S,T7161,S5982A,S,D1118H                                                                                                                                                                                                                                                                                                                                        | 6 | 948  |
| hCoV-19/Mexico/CMX-INMEGEN-06-04-66/2021        | EPI_ISL_2894210 | B.1.1.7 | GRY | 35 | 82A,G28883C,C28977T,G29715T                                                                                                                                                                                                                                                                                                                                                                                                                                                                                                                                                                                        | N:D3L,N:R203K,N:G204R,N:S235F,ORF1a:T1001,ORF1a:A1708D,ORF1a:I2230T,ORF1b:P314L,ORF1b:A1714L,ORF8:Q27*,ORF8:RS2,ORF8:Y73C,S,N501Y,SA570D,S0614G,S0681H,S,T7161,S5982A,S,D1118H                                                                                                                                                                                                                                                                                                                                  | 6 | 274  |
| hCoV-19/Mexico/CMX-INMEGEN-16-21/2021           | EPI_ISL_2978376 | B.1.1.7 | GRY | 36 | 282A,G28881A,G28882A,G28883C,C28977T                                                                                                                                                                                                                                                                                                                                                                                                                                                                                                                                                                               | N:D3L,N:R203K,N:G204R,N:S235F,ORF1a:T1001,ORF1a:A1708D,ORF1a:I2230T,ORF1a:M2259I,ORF1b:P218L,ORF1b:P314L,ORF1b:R2684S,ORF3a:H78Y,ORF8:Q27*,ORF8:RS2,ORF8:C61F,ORF8:Y73C,S,N501Y,SA570D,S0614G,S0681H,S,T7161,S5982A,S,D1118H                                                                                                                                                                                                                                                                                    | 6 | 238  |
| hCoV-19/Mexico/CMX-INMEGEN-16-75/2021           | EPI_ISL_2978423 | B.1.1.7 | GRY | 43 | C110T,C241T,C913T,C2110T,C3037T,C3267T,C3543T,C4900T,C5388A,C5986T,T6954C,G7042T,A10195G,C10341T,C14120T,C14408T,C14676T,C15108T,C15279T,T16176C,C16376T,C22792T,A23063T,C23271A,A23403G,C23604A,C23709T,T24506G,G24914C,C26645T,C27804T,C27972T,G28048T,G28075T,A28111G,G28280C,A28281T,T28282A,G28881A,G28882A,G28883C,C28977T                                                                                                                                                                                                                                                                                   | N:D3L,N:R203K,N:G204R,N:S235F,ORF1a:T1001,ORF1a:T1093I,ORF1a:A1708D,ORF1a:I2230T,ORF1a:M2259I,ORF1b:P218L,ORF1b:P314L,ORF1b:R2684S,ORF3a:H78Y,ORF8:Q27*,ORF8:RS2,ORF8:Y73C,S,N501Y,SA570D,S0614G,S0681H,S,T7161,S5982A,S,D1118H                                                                                                                                                                                                                                                                                 | 6 | 19   |
| hCoV-19/Mexico/CMX-INMEGEN-INDRE-04-04-99/2021  | EPI_ISL_1628598 | B.1.1.7 | GRY | 30 | 048T,A28111G,G28280C,A28281T,T28282A,G28881A,G28882A,G28883C,C28977T                                                                                                                                                                                                                                                                                                                                                                                                                                                                                                                                               | N:D3L,N:R203K,N:G204R,N:S235F,ORF1a:T1001,ORF1a:A1708D,ORF1a:I2230T,ORF1b:P314L,ORF8:Q27*,ORF8:RS2,ORF8:Y73C,S,SA570D,S0614G,S0681H,S,T7161,S5982A,S,D1118H                                                                                                                                                                                                                                                                                                                                                     | 6 | 7    |
| hCoV-19/Mexico/CMX-INMEGEN-INDRE-04-06-165/2021 | EPI_ISL_1810898 | B.1.1.7 | GRY | 41 | 095T,A28111G,G28280C,A28281T,T28282A,G28881A,G28882A,G28883C,C28977T                                                                                                                                                                                                                                                                                                                                                                                                                                                                                                                                               | N:D3L,N:R203K,N:G204R,N:S235F,ORF1a:T1001,ORF1a:A1708D,ORF1a:A212I,ORF1a:I2230T,ORF1b:P314L,ORF1b:R2684S,ORF3a:H78Y,ORF8:Q27*,ORF8:RS2,ORF8:K68*,ORF8:Y73C,S,G2195,S,N501Y,SA570D,S0614G,S0681H,S,T7161,S0836H,S5982A,S,D1118H                                                                                                                                                                                                                                                                                  | 6 | 118  |
| hCoV-19/Mexico/CMX-INMEGEN-INDRE-04-06-166/2021 | EPI_ISL_1810899 | B.1.1.7 | GRY | 40 | 111G,G28280C,A28281T,T28282A,G28881A,G28882A,G28883C,G28884C,C28977T                                                                                                                                                                                                                                                                                                                                                                                                                                                                                                                                               | N:D3L,N:R203K,N:G204R,N:S235F,ORF1a:T1001,ORF1a:A1708D,ORF1a:A212I,ORF1a:I2230T,ORF1b:P314L,ORF1b:R2684S,ORF3a:H78Y,ORF8:Q27*,ORF8:RS2,ORF8:K68*,ORF8:Y73C,S,G2195,S,N501Y,SA570D,S0614G,S0681H,S,T7161,S0836H,S5982A,S,D1118H                                                                                                                                                                                                                                                                                  | 6 | 0    |
| hCoV-19/Mexico/CMX-INMEGEN-INDRE-04-06-175/2021 | EPI_ISL_1810908 | B.1.1.7 | GRY | 40 | 111G,G28280C,A28281T,T28282A,G28881A,G28882A,G28883C,C28977T                                                                                                                                                                                                                                                                                                                                                                                                                                                                                                                                                       | N:D3L,N:R203K,N:G204R,N:S235F,ORF1a:T1001,ORF1a:A1708D,ORF1a:I2230T,ORF1a:M2259I,ORF1b:P218L,ORF1b:P314L,ORF1b:R2684S,ORF3a:H78Y,ORF8:Q27*,ORF8:RS2,ORF8:K68*,ORF8:Y73C,S,G2195,S,N501Y,SA570D,S0614G,S0681H,S,T7161,S0836H,S5982A,S,D1118H                                                                                                                                                                                                                                                                     | 6 | 19   |
| hCoV-19/Mexico/CMX-INMEGEN-INDRE-04-06-182/2021 | EPI_ISL_1810915 | B.1.1.7 | GR  | 39 | C,A28281T,T28282A,G28881A,G28882A,G28883C,C28977T,C29218T                                                                                                                                                                                                                                                                                                                                                                                                                                                                                                                                                          | N:D3L,N:R203K,N:G204R,N:S235F,ORF1a:P971L,ORF1a:T1001,ORF1a:A1708D,ORF1a:I2230T,ORF1a:S224F,ORF1a:I2230T,ORF1b:P314L,ORF1b:N734I,ORF7a:V24I                                                                                                                                                                                                                                                                                                                                                                     | 6 | 1576 |
| hCoV-19/Mexico/CMX-INMEGEN-INDRE-05-03-195/2021 | EPI_ISL_2319317 | B.1.1.7 | GR  | 30 | T24506G,G24914C,G27463T,G28881A,G28882A,G28883C,C28977T,C29580T                                                                                                                                                                                                                                                                                                                                                                                                                                                                                                                                                    | N:R203K,N:G204R,N:S235F,ORF1a:P971L,ORF1a:T1001,ORF1a:A1708D,ORF1a:I2230T,ORF1a:S224F,ORF1a:I2230T,ORF1b:P314L,ORF1b:N734I,ORF7a:V24I                                                                                                                                                                                                                                                                                                                                                                           | 6 | 1121 |
| hCoV-19/Mexico/CMX-INMEGEN-INDRE-05-03-209/2021 | EPI_ISL_2319330 | B.1.1.7 | GR  | 18 | T,C24374T,T24506G,G24914C,G27463T,G28167A,C28977T                                                                                                                                                                                                                                                                                                                                                                                                                                                                                                                                                                  | N:S235F,ORF1a:P971L,ORF1a:T1001,ORF1a:L1110I,ORF1a:A1708D,ORF1a:S224F,ORF1a:I2230T,ORF1a:F3785V,ORF1b:P314L,ORF1b:N734I,ORF7a:V24I                                                                                                                                                                                                                                                                                                                                                                              | 6 | 1637 |
| hCoV-19/Mexico/CMX-INMEGEN-INDRE-05-03-211/2021 | EPI_ISL_2319331 | B.1.1.7 | GR  | 37 | T1T28282A,G28881A,G28882A,G28883C,C28977T                                                                                                                                                                                                                                                                                                                                                                                                                                                                                                                                                                          | N:D3L,N:R203K,N:G204R,N:S235F,ORF1a:T1001,ORF1a:A1708D,ORF1a:I2230T,ORF1a:M2259I,ORF1b:P218L,ORF1b:P314L,ORF1b:A1432V,ORF3a:G224C,ORF8:Q27*,ORF8:RS2,ORF8:K68*,ORF8:Y73C,S,SA570D,S0614G,S0681H,S,T7161,S5982A,S,D1118H                                                                                                                                                                                                                                                                                         | 6 | 1147 |
| hCoV-19/Mexico/CMX-INMEGEN-INDRE-05-03-212/2021 | EPI_ISL_2319332 | B.1.1.7 | GR  | 20 | D241T,C913T,C3037T,C3267T,C5388A,C5944T,C5986T,G6647A,T6954C,C9996T,A10486G,C14408T,C14676T,T15096C,C15279T,T16176C,C17676T,C18183T,C19524T,A21519C,G22217A,A23063T,C23271A,A23403G,C23604A,C23709T,T24506G,G24914C,G25217T,G2727T,G28048T,A28095T,A28111G,G28280C,A28282A,G28881A,G28882A,G28883C,C28977T                                                                                                                                                                                                                                                                                                         | N:D3L,N:R203K,N:G204R,N:S235F,ORF1a:T1001,ORF1a:A1708D,ORF1a:I2230T,ORF1b:P314L,ORF1b:A1715I,ORF8:Q27*,ORF8:RS2,ORF8:Y73C,S,N501Y,SA570D,S0614G,S0681H,S,T7161,S5982A,S,D1118H                                                                                                                                                                                                                                                                                                                                  | 6 | 0    |
| hCoV-19/Mexico/CMX-INMEGEN-INDRE-05-03-233/2021 | EPI_ISL_2319347 | B.1.1.7 | GRY | 44 | 84C,C27972T,G28048T,A28095T,A28111G,G28280C,A28281T,T28282A,G28881A,G28882A,G28883C,C28977T                                                                                                                                                                                                                                                                                                                                                                                                                                                                                                                        | N:D3L,N:R203K,N:G204R,N:S235F,ORF1a:T1001,ORF1a:A1708D,ORF1a:I2230T,ORF1b:P314L,ORF1b:A1715I,ORF8:Q27*,ORF8:RS2,ORF8:Y73C,S,N501Y,SA570D,S0614G,S0681H,S,T7161,S0836H,S5982A,S,D1118H                                                                                                                                                                                                                                                                                                                           | 6 | 0    |



|                                                 |                 |         |     |    |                                                                                                                                                                                                                                                                                                                                                                                                                                                                                                                                                                                                                                                                                                |  |  |  |                                                                                                                                                                                                                                   |                                                                                                                                                                                                                                        |      |     |
|-------------------------------------------------|-----------------|---------|-----|----|------------------------------------------------------------------------------------------------------------------------------------------------------------------------------------------------------------------------------------------------------------------------------------------------------------------------------------------------------------------------------------------------------------------------------------------------------------------------------------------------------------------------------------------------------------------------------------------------------------------------------------------------------------------------------------------------|--|--|--|-----------------------------------------------------------------------------------------------------------------------------------------------------------------------------------------------------------------------------------|----------------------------------------------------------------------------------------------------------------------------------------------------------------------------------------------------------------------------------------|------|-----|
|                                                 |                 |         |     |    | C241T,C913T,C2453T,C3037T,C3267T,C5388A,C5986T,A6575T,T6954C,C9611T,C14408T,C14676T,C15279T,T16176C,C20930T,C21855T,G21974C,A23063T,C23271A,A23403G,C23604A,C23709T,G24914C,G2506G,G24914C,C27972T,G28048T,A28111G,G28280C,A28295G,G28881A,G28882A,G28883C,C28977T                                                                                                                                                                                                                                                                                                                                                                                                                             |  |  |  | N:N8D,N:R203K,N:G204R,N:S235F,ORF1a:1730F,ORF1a:T1001,ORF1a:A1708D,ORF1a:S2104C,ORF1a:I2230T,ORF1a:K1316F,ORF1b:P314L,ORF1b:T2488M,ORF8:Q27*,ORF8:R52I,ORF8:Y73C,S:N501Y,S:A570D,S:D614G,S:P681H,S:T716I,S:V772A,S:5982A,S:D1118H | 6                                                                                                                                                                                                                                      | 9    |     |
| hCoV-19/Mexico/CMX-INMEGEN-INDRE-05-03-249/2021 | EPI_ISL_2319359 | B.1.1.7 | GRY | 34 | 82A,G28883C,C28977T                                                                                                                                                                                                                                                                                                                                                                                                                                                                                                                                                                                                                                                                            |  |  |  | 25                                                                                                                                                                                                                                | S:P681H,S:T716I,S:V772A,S:5982A,S:D1118H                                                                                                                                                                                               | 6    | 9   |
| hCoV-19/Mexico/CMX-INMEGEN-INDRE-05-03-253/2021 | EPI_ISL_2319363 | B.1.1.7 | G   | 32 | C241T,C913T,C3037T,C3267T,C5388A,C5986T,T6954C,C7299T,A13768T,C14408T,C14676T,T15096C,C15279T,T16176C,C19862T,C23271A,A23403G,C23604A,C23709T,T24506G,G24914C,C26606T,G27281T,C27972T,G28048T,A28095T,A28111G,G28280C,A28281T,T28282A,C28977T,A29C241T,C878T,C913T,C3037T,C3267T,C5388A,C5986T,T6954C,A12162G,C12400T,C14408T,C14676T,C15279T,C15720T,T16176C,A17615G,A21137G,A23063T,C23271A,A23403G,C23604A,C23709T,G24095T,T24506G,G24914C,G25135T,G26998T,C27972T,G28048T,A28111G,G28280C,A28281T,T28282A,G28881A,G28882A,G28883C,C28977T                                                                                                                                                  |  |  |  | N:D3L,N:S235F,ORF1a:T1001,ORF1a:A1708D,ORF1a:I2230T,ORF1a:A2345V,O,RF1b:M101L,ORF1b:P314L,ORF1b:A2132V,ORF6:W27L,ORF8:Q27*,ORF8:R52I,ORF8:K68*,ORF8:Y73C,S:A570D,S:D614G,S:P681H,S:T716I,S:5982A,S:D1118H                         | 20                                                                                                                                                                                                                                     | 970  |     |
| hCoV-19/Mexico/CMX-INMEGEN-INDRE-05-03-271/2021 | EPI_ISL_2319371 | B.1.1.7 | GRY | 37 | 8281T,T28282A,G28881A,G28882A,G28883C,C28977T                                                                                                                                                                                                                                                                                                                                                                                                                                                                                                                                                                                                                                                  |  |  |  | 24                                                                                                                                                                                                                                | 8455,S:5982A,S:D1118H,S:K1191N                                                                                                                                                                                                         | 6    | 0   |
| hCoV-19/Mexico/CMX-INMEGEN-INDRE-05-03-275/2021 | EPI_ISL_2319375 | B.1.1.7 | G   | 32 | C241T,C913T,C2110T,C3037T,C3267T,C5388A,C5986T,T6954C,G7042T,C7834T,A10195G,C14120T,C14408T,C14676T,C15279T,T16176C,C16833T,C23271A,A23403G,C23604A,C23709T,T24506G,G24914C,C27972T,G28048T,G28075T,A28095T,A28111G,G28280C,A28281T,T28282A,C289C241T,C913T,C2453T,C3037T,C3267T,C5388A,C5986T,T6954C,C9611T,C14408T,C14676T,C15279T,T16176C,C21855T,G21974C,A23063T,C23271A,A23403G,C23604A,C23709T,T24506G,G24914C,G25344A,C3037T,C3267T,C5388A,C5986T,T6954C,G7042T,A10195G,C11020T,C14120T,C14408T,C14676T,C15279T,T16176C,A23063T,C23271A,A23403G,C23604A,C23709T,T24506G,G24914C,C26936T,C27972T,G28048T,G28075T,A28095T,A28111G,G28280C,A28281T,T28282A,G28881A,G28882A,G28883C,C28977T |  |  |  | N:D3L,N:S235F,ORF1a:T1001,ORF1a:A1708D,ORF1a:I2230T,ORF1a:M2259I,ORF1b:P218L,ORF1b:P314L,ORF8:Q27*,ORF8:R52I,ORF8:C61F,ORF8:K68*,ORF8:Y73C,S:A570D,S:D614G,S:P681H,S:T716I,S:5982A,S:D1118H                                       | 19                                                                                                                                                                                                                                     | 2273 |     |
| hCoV-19/Mexico/COA-InDRE_FB13031_S1493/2021     | EPI_ISL_1805471 | B.1.1.7 | G   | 34 | 494A,C25710T,C27294T,C27972T,G28048T,A28111G,G28280C,A28281T,T28282A,G28881A,G28882A,G28883C,C28977T                                                                                                                                                                                                                                                                                                                                                                                                                                                                                                                                                                                           |  |  |  | 21                                                                                                                                                                                                                                | D138H,S:N501Y,S:A570D,S:D614G,S:P681H,S:T716I,S:5982A,S:D1118H                                                                                                                                                                         | 6    | 890 |
| hCoV-19/Mexico/COA-InDRE_FB14127_S1762/2021     | EPI_ISL_2101901 | B.1.1.7 | GRY | 37 | 281T,T28282A,G28881A,G28882A,G28883C,C28977T                                                                                                                                                                                                                                                                                                                                                                                                                                                                                                                                                                                                                                                   |  |  |  | 23                                                                                                                                                                                                                                | 716I,S:5982A,S:D1118H                                                                                                                                                                                                                  | 6    | 274 |
| hCoV-19/Mexico/COA-InDRE_FB16336_S2737/2021     | EPI_ISL_2533763 | Q.3     | GRY | 38 | C241T,C913T,C3037T,C3267T,G5023A,C5388A,C5986T,C6568T,C6848T,T6954C,A9529G,G10396T,C14408T,C14676T,C15279T,T16176C,A17615G,G20962A,G22094C,A23063T,C23271A,A23403G,C23604A,C23709T,T24506G,G24914C,C25433T,G26730C,C27972T,G28048T,A28111G,G28280C,A28281T,T28282A,G28881A,G28882A,G28883C,C28977T                                                                                                                                                                                                                                                                                                                                                                                             |  |  |  | 25                                                                                                                                                                                                                                | A570D,S:D614G,S:P681H,S:T716I,S:5982A,S:D1118H                                                                                                                                                                                         | 6    | 0   |
| hCoV-19/Mexico/COA-InDRE_FB16772_S2777/2021     | EPI_ISL_2533803 | Q.3     | GRY | 38 | C241T,C913T,C3037T,C3267T,G5023A,C5388A,C5986T,C6568T,C6848T,T6954C,A9529G,G10396T,C14408T,C14676T,C15279T,T16176C,A17615G,G20962A,G22094C,A23063T,C23271A,A23403G,C23604A,C23709T,T24506G,G24914C,C25433T,G26730C,C27972T,G28048T,A28111G,G28280C,A28281T,T28282A,G28881A,G28882A,G28883C,C28977T                                                                                                                                                                                                                                                                                                                                                                                             |  |  |  | 25                                                                                                                                                                                                                                | A570D,S:D614G,S:P681H,S:T716I,S:5982A,S:D1118H                                                                                                                                                                                         | 6    | 0   |
| hCoV-19/Mexico/COA-InDRE_FB17411_S3519/2021     | EPI_ISL_2779034 | B.1.1.7 | GRY | 34 | 494A,C25710T,C27294T,C27972T,G28048T,A28111G,G28280C,A28281T,T28282A,G28881A,G28882A,G28883C,C28977T                                                                                                                                                                                                                                                                                                                                                                                                                                                                                                                                                                                           |  |  |  | 19                                                                                                                                                                                                                                | A570D,S:D614G,S:P681H,S:T716I,S:5982A,S:D1118H                                                                                                                                                                                         | 6    | 0   |
| hCoV-19/Mexico/COA-InDRE_FB17711_S4112/2021     | EPI_ISL_2920683 | B.1.1.7 | GRY | 36 | 2A,G28881A,G28882A,G28883C,C28977T                                                                                                                                                                                                                                                                                                                                                                                                                                                                                                                                                                                                                                                             |  |  |  | 21                                                                                                                                                                                                                                | D3L,N:R203K,N:G204R,N:S235F,ORF1a:T1001,ORF1a:A1708D,ORF1a:I2230T,ORF1a:K1383R,ORF1b:D2499N,ORF3a:T14I,ORF8:Q27*,ORF8:R52I,ORF8:Y73C,S:D178H,S:N501Y,S:A570D,S:D614G,S:P681H,S:T716I,S:5982A,S:D1118H                                  | 6    | 0   |
| hCoV-19/Mexico/COA-InDRE_FB18231_S4134/2021     | EPI_ISL_2920705 | B.1.1.7 | GRY | 38 | 0C,A28281T,T28282A,G28881A,G28882A,G28883C,C28977T                                                                                                                                                                                                                                                                                                                                                                                                                                                                                                                                                                                                                                             |  |  |  | 22                                                                                                                                                                                                                                | 982A,S:D1118H                                                                                                                                                                                                                          | 6    | 0   |
| hCoV-19/Mexico/COL-InDRE_FB15039_S2055/2021     | EPI_ISL_2283697 | B.1.1.7 | GRY | 41 | 280C,A28281T,T28282A,G28881A,G28882A,G28883C,C28977T,C29095T,G29862T,A29866C                                                                                                                                                                                                                                                                                                                                                                                                                                                                                                                                                                                                                   |  |  |  | 23                                                                                                                                                                                                                                | I:5982A,S:D1118H,S:K1191N                                                                                                                                                                                                              | 6    | 0   |
| hCoV-19/Mexico/COL-InDRE_FB16092_S2459/2021     | EPI_ISL_2455980 | B.1.1.7 | GRY | 42 | 72T,G28048T,A28111G,G28280C,A28281T,T28282A,G28881A,G28882A,G28883C,C28977T,C29C241T,C913T,C3037T,C3267T,C5388A,C5986T,T6954C,G9190T,A12162G,C13665T,C14408T,C14676T,C15279T,C15720T,T16176C,A17615G,C18747T,C20844T,A21137G,A23063T,C23271A,A23403G,C23604A,C23709T,T24506G,G24914C,G25135T,A25336C,C25578T,C26110T,C27972T,G28048T,A28111G,G28280C,A28281T,T28282A,G28881A,G28882A,G28883C,C28977T                                                                                                                                                                                                                                                                                           |  |  |  | 24                                                                                                                                                                                                                                | S:P681H,S:T716I,S:5982A,S:D1118H,S:K1191N                                                                                                                                                                                              | 6    | 0   |
| hCoV-19/Mexico/COL-InDRE_FB16093_S3078/2021     | EPI_ISL_2663345 | B.1.1.7 | GRY | 35 | 8881A,G28882A,G28883C,C28977T                                                                                                                                                                                                                                                                                                                                                                                                                                                                                                                                                                                                                                                                  |  |  |  | 19                                                                                                                                                                                                                                | N:D3L,N:R203K,N:G204R,N:S235F,ORF1a:T1001,ORF1a:EI633D,ORF1a:A1708D,ORF1a:I2230T,ORF1a:Q3966R,ORF1b:P314L,ORF1b:K1383R,ORF1b:K2557R,ORF3a:P240S,ORF8:Q27*,ORF8:R52I,ORF8:Y73C,S:N501Y,S:A570D,S:D614G,S:P681H,S:T716I,S:5982A,S:D1118H | 6    | 0   |
| hCoV-19/Mexico/COL-InDRE_FB16402_S2480/2021     | EPI_ISL_2456001 | B.1.1.7 | GRY | 42 | 72T,G28048T,A28111G,G28280C,A28281T,T28282A,G28881A,G28882A,G28883C,C28977T,C29C241T,C913T,G1836A,G2281A,C3037T,C3267T,C5388A,C5986T,T6954C,A12162G,C14408T,C14676T,C15279T,C15720T,T16176C,A17615G,C18698T,C18747T,C20844T,A21137G,A23063T,C23271A,A23403G,C23604A,C23709T,T24506G,G24914C,G25135T,A25336C,G25337C,G26110T,C27972T,G28048T,A28111G,G28280C,A28281T,T28282A,G28881A,G28882A,G28883C,C28977T                                                                                                                                                                                                                                                                                    |  |  |  | 27                                                                                                                                                                                                                                | 70D,S:D614G,S:P681H,S:T716I,S:5982A,S:D1118H,S:K1191N,S:EI258D,S:D1118H                                                                                                                                                                | 6    | 0   |
| hCoV-19/Mexico/DUR-InDRE_FB17381_S3478/2021     | EPI_ISL_2778993 | B.1.1.7 | GRY | 44 | A25336C,G25337C,C27972T,G28048T,A28111G,G28280C,A28281T,T28282A,G28881A,G28882A,G28883C,C28977T                                                                                                                                                                                                                                                                                                                                                                                                                                                                                                                                                                                                |  |  |  | 23                                                                                                                                                                                                                                | 501Y,S:A570D,S:D614G,S:P681H,S:T716I,S:5982A,S:D1118H,S:EI258D                                                                                                                                                                         | 6    | 0   |
| hCoV-19/Mexico/DUR-InDRE_FB17382_S3479/2021     | EPI_ISL_2778994 | B.1.1.7 | GRY | 44 | A25336C,G25337C,C27972T,G28048T,A28111G,G28280C,A28281T,T28282A,G28881A,G28882A,G28883C,C28977T                                                                                                                                                                                                                                                                                                                                                                                                                                                                                                                                                                                                |  |  |  | 23                                                                                                                                                                                                                                | 501Y,S:A570D,S:D614G,S:P681H,S:T716I,S:5982A,S:D1118H,S:EI258D                                                                                                                                                                         | 6    | 0   |
| hCoV-19/Mexico/DUR-InDRE_FB17386_S3481/2021     | EPI_ISL_2778996 | B.1.1.7 | GRY | 34 | 14C,A25336C,G25337C,C27972T,G28048T,A28111G,G28280C,A28281T,T28282A,G28881A,G28882A,G28883C,C28977T                                                                                                                                                                                                                                                                                                                                                                                                                                                                                                                                                                                            |  |  |  | 23                                                                                                                                                                                                                                | 501Y,S:A570D,S:D614G,S:P681H,S:T716I,S:5982A,S:D1118H,S:EI258D                                                                                                                                                                         | 6    | 0   |
| hCoV-19/Mexico/DUR-InDRE_FB17390_S3485/2021     | EPI_ISL_2779000 | B.1.1.7 | GRY | 34 | 14C,A25336C,G25337C,C27972T,G28048T,A28111G,G28280C,A28281T,T28282A,G28881A,G28882A,G28883C,C28977T                                                                                                                                                                                                                                                                                                                                                                                                                                                                                                                                                                                            |  |  |  | 23                                                                                                                                                                                                                                | 501Y,S:A570D,S:D614G,S:P681H,S:T716I,S:5982A,S:D1118H,S:EI258D                                                                                                                                                                         | 6    | 0   |
| hCoV-19/Mexico/GRO-InDRE_F48G_S568/2021         | EPI_ISL_1334381 | B.1.1.7 | GRY | 32 | 27972T,G28048T,A28111G,G28280C,A28281T,T28282A,C28603T,G28881A,G28882A,G28883C,                                                                                                                                                                                                                                                                                                                                                                                                                                                                                                                                                                                                                |  |  |  | 21                                                                                                                                                                                                                                | ORF8:Y73C,S:N501Y,S:A570D,S:D614G,S:P681H,S:T716I,S:5982A,S:D1118H                                                                                                                                                                     | 6    | 706 |

|                                             |                 |         |     |    |                                                                                                                                                                                                                                                                                    |                                                                                                                                                                                                                                                                                             |    |      |
|---------------------------------------------|-----------------|---------|-----|----|------------------------------------------------------------------------------------------------------------------------------------------------------------------------------------------------------------------------------------------------------------------------------------|---------------------------------------------------------------------------------------------------------------------------------------------------------------------------------------------------------------------------------------------------------------------------------------------|----|------|
| hCoV-19/Mexico/GUA-InDRE_FB10833_S574/2021  | EPI_ISL_1334386 | B.1.1.7 | GRY | 35 | C241T,C913T,C3037T,C3267T,C5388A,C5986T,T6954C,C9693T,C14408T,C14676T,C15279T,T16176C,C22716A,T22716C,T23042C,A23063T,C23271A,A23403G,C23604A,C23709T,T24506G,G24914C,G25218T,G2553T,C27615T,C27972T,G28048T,A28111G,G28280C,A28281T,T28282A,G2881A,G28882A,G28883C,C28977T        | N:D3L:N:R203K,N:G204R,N:S235F,ORF1a:T1001,ORF1a:A1708D,ORF1a:I2230T,ORF1a:A3143V,ORF1b:P314L,ORF3a:A54V,ORF8:Q27*,ORF8:R52I,ORF8:Y73C,S:T385N,S:S494P,S:N501Y,S:A570D,S:D614G,S:P681H,S:T716I,S:S5982A,S:D1118H,S:G1219V                                                                    | 6  | 147  |
| hCoV-19/Mexico/GUA-InDRE_FB12716_S1202/2021 | EPI_ISL_1626809 | B.1.1.7 | GRY | 36 | C241T,C913T,C2110T,C2841T,C3037T,C3267T,C5388A,C5986T,T6954C,G7042T,C14120T,C14408T,C14676T,C15279T,T16176C,T17583G,A23063T,C23271A,A23403G,C23604A,C23709T,T24506G,G24914C,A25336C,G25337C,G25624T,C27972T,G28048T,A28111G,G28280C,A28281T,T28282A,G2881A,G28882A,G28883C,C28977T | N:D3L:N:R203K,N:G204R,N:S235F,ORF1a:A859V,ORF1a:T1001,ORF1a:A1708D,ORF1a:I2230T,ORF1a:M2259I,ORF1b:P218L,ORF1b:P314L,ORF3a:H78Y,ORF8:Q27*,ORF8:R52I,ORF8:Y73C,S:N501Y,S:A570D,S:D614G,S:P681H,S:T716I,S:S5982A,S:D1118H,S:E1258D,S:D1259H                                                   | 6  | 0    |
| hCoV-19/Mexico/GUA-InDRE_FB13877_S2078/2021 | EPI_ISL_2283718 | B.1.1.7 | GRY | 34 | C241T,C913T,C2453T,C3037T,C3267T,C5388A,C5986T,T6954C,C9611T,C14408T,C14676T,C15279T,T16176C,C21855T,G21974C,A23063T,C23271A,A23403G,C23604A,C23709T,T24506G,G24914C,G25273T,C27972T,G28048T,A28111G,G28280C,A28281T,T28282A,A28295G,C28737T,G28881A,G28882A,G28883C,C28977T       | N:D3L:N:N8D,N:A155V,N:R203K,N:G204R,N:S235F,ORF1a:I730F,ORF1a:T1001,ORF1a:A1708D,ORF1a:I2230T,ORF1a:L3116F,ORF1b:P314L,ORF8:Q27*,ORF8:R52I,ORF8:Y73C,S:S98F,S:D138H,S:N501Y,S:A570D,S:D614G,S:P681H,S:716I,S:S5982A,S:D1118H                                                                | 6  | 411  |
| hCoV-19/Mexico/GUA-InDRE_FB13881_S1754/2021 | EPI_ISL_2101893 | B.1.1.7 | GRY | 35 | 81A,G28882A,G28883C,C28977T                                                                                                                                                                                                                                                        | N:D3L:N:N8D,N:R203K,N:G204R,N:S235F,ORF1a:E37D,ORF1a:I730F,ORF1a:T1001,ORF1a:A1708D,ORF1a:I2230T,ORF1a:L3116F,ORF1b:P314L,ORF8:Q27*,ORF8:R52I,ORF8:Y73C,S:S98F,S:D138H,S:N501Y,S:A570D,S:D614G,S:P681H,S:716I,S:S5982A,S:D1118H,S:M1237I                                                    | 6  | 0    |
| hCoV-19/Mexico/GUA-InDRE_FB13904_S2077/2021 | EPI_ISL_2283717 | B.1.1.7 | GRY | 34 | 882A,G28883C,C28977T                                                                                                                                                                                                                                                               | N:D3L:N:N8D,N:R203K,N:G204R,N:S235F,ORF1a:I730F,ORF1a:T1001,ORF1a:A1708D,ORF1a:I2230T,ORF1a:L3116F,ORF1b:P314L,ORF8:Q27*,ORF8:R52I,ORF8:Y73C,S:S98F,S:D138H,S:N501Y,S:A570D,S:D614G,S:P681H,S:716I,S:S5982A,S:D1118H                                                                        | 6  | 0    |
| hCoV-19/Mexico/GUA-InDRE_FB13907_S1755/2021 | EPI_ISL_2101894 | B.1.1.7 | GRY | 34 | 882A,G28883C,C28977T                                                                                                                                                                                                                                                               | N:D3L:N:N8D,N:R203K,N:G204R,N:S235F,ORF1a:I730F,ORF1a:T1001,ORF1a:A1708D,ORF1a:I2230T,ORF1a:L3116F,ORF1b:P314L,ORF8:Q27*,ORF8:R52I,ORF8:Y73C,S:S98F,S:D138H,S:N501Y,S:A570D,S:D614G,S:P681H,S:716I,S:S5982A,S:D1118H                                                                        | 6  | 0    |
| hCoV-19/Mexico/GUA-InDRE_FB14636_S2081/2021 | EPI_ISL_2295590 | B.1.1.7 | GRY | 34 | 882A,G28883C,C28977T                                                                                                                                                                                                                                                               | N:D3L:N:R203K,N:G204R,N:S235F,ORF1a:T1001,ORF1a:A1708D,ORF1a:I2230T,ORF1a:C379F,ORF1a:K3861R,ORF1a:Q3966R,ORF1b:P314L,ORF1b:K1383R,ORF1b:K2557R,ORF3a:S74F,ORF3a:P240S,ORF8:Q27*,ORF8:R52I,ORF8:Y73C,S:T191S,N501Y,S:A570D,S:D614G,S:P681H,S:T716I,S:S5982A,S:D1118H,S:K119S                | 12 | 0    |
| hCoV-19/Mexico/GUA-InDRE_FB14800_S2082/2021 | EPI_ISL_2283721 | B.1.1.7 | GRY | 20 | C241T,C913T,C3037T,C3267T,C3653T,A5311C,C5388A,C5986T,C6196T,T6954C,A8848G,C14408T,C14676T,C15279T,T16176C,A23063T,C23271A,A23403G,C23604A,C23709T,T24506G,G24914C,G27754T,C27972T,G28048T,A28111G,G28280C,A28281T,T28282A,G2881A,G28882A,G28883C,C28977T                          | N:D3L:N:R203K,N:G204R,N:S235F,ORF1a:T1001,ORF1a:A1708D,ORF1a:I2230T,ORF1a:M2259I,ORF1b:P218L,ORF1b:P314L,ORF7a:102F,ORF7a:T15I,ORF8:Q27*,ORF8:R52I,ORF8:Y73C,S:T61S,N501Y,S:A570D,S:D614G,S:P681H,S:T716I,S:D1118H                                                                          | 6  | 0    |
| hCoV-19/Mexico/GUA-InDRE_FB14824_S2083/2021 | EPI_ISL_2283722 | B.1.1.7 | GRY | 34 | 882A,G28883C,C28977T                                                                                                                                                                                                                                                               | N:D3L:N:R203K,N:G204R,N:S235F,ORF1a:P804L,ORF1a:T1001,ORF1a:G1119S,ORF1a:A1708D,ORF1a:I2230T,ORF1a:M2259I,ORF1b:P218L,ORF1b:P314L,ORF7a:102F,ORF7a:T15I,ORF8:Q27*,ORF8:R52I,ORF8:Y73C,S:T61S,N501Y,S:A570D,S:D614G,S:P681H,S:T716I,S:D1118H                                                 | 6  | 0    |
| hCoV-19/Mexico/GUA-InDRE_FB14826_S2470/2021 | EPI_ISL_2455991 | B.1.1.7 | GRY | 36 | 82A,G28883C,C28977T,G29294A,G29715T                                                                                                                                                                                                                                                | N:D3L:N:R203K,N:G204R,N:S235F,ORF1a:T1001,ORF1a:P1284S,ORF1a:A1708D,ORF1a:I2230T,ORF1b:P314L,ORF1b:T1896F,ORF1b:E121*,ORF8:Q27*,ORF8:R52I,ORF8:Y73C,S:N501Y,S:A570D,S:D614G,S:P681H,S:T716I,S:S5982A,S:D1118H,S:E1258D                                                                      | 6  | 0    |
| hCoV-19/Mexico/GUA-InDRE_FB14832_S3059/2021 | EPI_ISL_2663326 | B.1.1.7 | GRY | 24 | 1A,G28882A,G28883C,C28977T                                                                                                                                                                                                                                                         | N:D3L:N:R203K,N:G204R,N:S235F,N:D341N,ORF1a:T1001,ORF1a:P1284S,ORF1a:A1708D,ORF1a:M2036T,ORF1a:I2230T,ORF1b:P314L,ORF1b:K1383R,ORF1b:H2285Y,ORF1b:P2313S,ORF1b:K2557R,ORF3a:P240S,ORF8:Q27*,ORF8:R52I,ORF8:Y73C,S:N501Y,S:A570D,S:D614G,S:P681H,S:T716I,S:S5982A,S:D1118H,S:E1258D          | 6  | 1064 |
| hCoV-19/Mexico/GUA-InDRE_FB14839_S2469/2021 | EPI_ISL_2455990 | B.1.1.7 | GRY | 28 | 2A,G28881A,G28882A,G28883C,C28977T,G29294A,G29715T                                                                                                                                                                                                                                 | N:D3L:N:R203K,N:G204R,N:S235F,ORF1a:A690V,ORF1a:T1001,ORF1a:A1708D,ORF1a:I2230T,ORF1a:Q3966R,ORF1b:P314L,ORF1b:K1383R,ORF1b:H2285Y,ORF1b:P2313S,ORF1b:K2557R,ORF3a:P240S,ORF8:Q27*,ORF8:R52I,ORF8:Y73C,S:N501Y,S:A570D,S:D614G,S:P681H,S:T716I,S:S5982A,S:D1118H,S:K1191N,S:G1219V,S:E1258D | 6  | 0    |
| hCoV-19/Mexico/GUA-InDRE_FB16209_S2465/2021 | EPI_ISL_2455986 | B.1.1.7 | GRY | 42 | 29095T                                                                                                                                                                                                                                                                             | N:D3L:N:N8D,N:R203K,N:G204R,N:S235F,ORF1a:E37D,ORF1a:I730F,ORF1a:T1001,ORF1a:A1708D,ORF1a:I2230T,ORF1a:L3116F,ORF1b:P314L,ORF1b:P2256S,ORF8:Q27*,ORF8:R52I,ORF8:Y73C,S:S98F,S:D138H,S:N501Y,S:A570D,S:D614G,S:P681H,S:T716I,S:S5982A,S:D1118H,S:M1237I,S:E1258D                             | 6  | 54   |
| hCoV-19/Mexico/GUA-InDRE_FB16216_S2466/2021 | EPI_ISL_2455987 | B.1.1.7 | GRY | 40 | G28280C,A28281T,T28282A,A28295G,G28881A,G28882A,G28883C,C28977T                                                                                                                                                                                                                    | N:D3L:N:N8D,N:R203K,N:G204R,N:S235F,ORF1a:I730F,ORF1a:T1001,ORF1a:A1708D,ORF1a:I2230T,ORF1a:L3116F,ORF1b:P314L,ORF8:Q27*,ORF8:R52I,ORF8:Y73C,S:S98F,S:D138H,S:N501Y,S:A570D,S:D614G,S:P681H,S:T716I,S:S5982A,S:D1118H,S:K1191N,S:E1258D                                                     | 6  | 0    |
| hCoV-19/Mexico/GUA-InDRE_FB16219_S2467/2021 | EPI_ISL_2455988 | B.1.1.7 | GRY | 36 | 295G,G28881A,G28882A,G28883C,C28977T                                                                                                                                                                                                                                               | N:D3L:N:N8D,N:R203K,N:G204R,N:S235F,ORF1a:I730F,ORF1a:T1001,ORF1a:A1708D,ORF1a:I2230T,ORF1a:L3116F,ORF1b:P314L,ORF1b:K1383R,ORF1b:H2285Y,ORF1b:P2313S,ORF1b:K2557R,ORF3a:P240S,ORF8:Q27*,ORF8:R52I,ORF8:Y73C,S:N501Y,S:A570D,S:D614G,S:P681H,S:T716I,S:S5982A,S:D1118H,S:K1191N,S:E1258D    | 6  | 0    |
| hCoV-19/Mexico/GUA-InDRE_FB16459_S3475/2021 | EPI_ISL_2778990 | B.1.1.7 | GRY | 38 | 8281T,T28282A,A28295G,G28881A,G28882A,G28883C,C28977T                                                                                                                                                                                                                              | N:D3L:N:N8D,N:R203K,N:G204R,N:S235F,ORF1a:I730F,ORF1a:T1001,ORF1a:A1708D,ORF1a:I2230T,ORF1a:L3116F,ORF1b:P314L,ORF8:Q27*,ORF8:R52I,ORF8:Y73C,S:N501Y,S:A570D,S:D614G,S:P681H,S:T716I,S:S5982A,S:D1118H,S:K1191N,S:E1258D                                                                    | 6  | 0    |
| hCoV-19/Mexico/GUA-InDRE_FB16460_S3779/2021 | EPI_ISL_2779281 | B.1.1.7 | GRY | 40 | G28280C,A28281T,T28282A,A28295G,G28881A,G28882A,G28883C,C28977T                                                                                                                                                                                                                    | N:D3L:N:N8D,N:R203K,N:G204R,N:S235F,ORF1a:E37D,ORF1a:I730F,ORF1a:T1001,ORF1a:A1708D,ORF1a:I2230T,ORF1a:L3116F,ORF1b:P314L,ORF1b:P2256S,ORF8:Q27*,ORF8:R52I,ORF8:Y73C,S:S98F,S:D138H,S:N501Y,S:A570D,S:D614G,S:P681H,S:T716I,S:S5982A,S:D1118H,S:M1237I,S:E1258D,S:D1259H                    | 6  | 71   |
| hCoV-19/Mexico/GUA-InDRE_FB16463_S3476/2021 | EPI_ISL_2778991 | B.1.1.7 | GRY | 39 | A28281T,T28282A,A28295G,G28881A,G28882A,G28883C,C28977T                                                                                                                                                                                                                            | N:D3L:N:N8D,N:R203K,N:G204R,N:S235F,ORF1a:I730F,ORF1a:T1001,ORF1a:A1708D,ORF1a:I2230T,ORF1a:L3116F,ORF1b:P314L,ORF8:Q27*,ORF8:R52I,ORF8:Y73C,S:S98F,S:N501Y,S:A570D,S:D614G,S:P681H,S:T716I,S:S5982A,S:D1118H,S:M1237I,S:E1258D,S:D1259H                                                    | 6  | 0    |
| hCoV-19/Mexico/GUA-InDRE_FB16465_S3477/2021 | EPI_ISL_2778992 | B.1.1.7 | GRY | 20 | 754T,C27972T,G28048T,A28111G,G28280C,A28281T,T28282A,G2881A,G28882A,G28883C,C2                                                                                                                                                                                                     | N:D3L:N:R203K,N:G204R,N:S235F,ORF1a:T1001,ORF1a:A1708D,ORF1a:I2230T,ORF1a:74304I,ORF1b:P314L,ORF7a:E121*,ORF8:Q27*,ORF8:R52I,ORF8:Y73C,S:N501Y,S:A570D,S:D614G,S:P681H,S:T716I,S:S5982A,S:D1118H                                                                                            | 6  | 671  |

|                                             |                 |         |     |    |                                                                                                                                                                                                                                                                                                              |                                                                                                                                                                                                                                                           |   |     |
|---------------------------------------------|-----------------|---------|-----|----|--------------------------------------------------------------------------------------------------------------------------------------------------------------------------------------------------------------------------------------------------------------------------------------------------------------|-----------------------------------------------------------------------------------------------------------------------------------------------------------------------------------------------------------------------------------------------------------|---|-----|
| hCoV-19/Mexico/GUA-IndRE_FB16466_S3504/2021 | EPI_ISL_2779019 | B.1.1.7 | GRY | 35 | C241T,C913T,C3037T,C3267T,C5388A,C5986T,T6954C,A8848G,C13176T,C14408T,C14676T,C15279T,T16176C,A23063T,C23271A,A23403G,C23604A,C23709T,T24506G,G24914C,A25336C,G25337C,G2754T,C27972T,G28048T,A28111G,G28280C,A28281T,T28282A,G28881A,G28882A,G28883C,C28977T,C29296T,G29715T                                 | N:D3L,N:R203K,N:G204R,N:S235F,ORF1a:T1001,ORF1a:A1708D,ORF1a:I2230T,ORF1a:T4304I,ORF1b:P314L,ORF7b:E121T,ORF8:Q27*,ORF8:R52I,ORF8:Y73C,S:N501Y,SA570D,SD614G,SP681H,S:T716I,SS982A,SD1118H,S:E1258D,SD1259H                                               | 6 | 63  |
| hCoV-19/Mexico/GUA-IndRE_FB16891_S3116/2021 | EPI_ISL_2663383 | B.1.1.7 | GRY | 36 | C241T,C913T,G2227T,C3037T,C3267T,C5388A,C5986T,G6196T,A6350G,T6954C,A8848G,C14408T,C14676T,C15279T,T16176C,A23063T,C23271A,A23403G,C23604A,C23709T,T24506G,G24914C,G25217T,G26727T,T27570C,C27972T,G28048T,A28111G,G28280C,A28281T,T28282A,G28881A,G28882A,G28883C,C28977T,G29715T                           | M:A695,N:D3L,N:R203K,N:G204R,N:S235F,ORF1a:K669N,ORF1a:T1001,ORF1a:A1708D,ORF1a:K2029E,ORF1a:I2230T,ORF1b:P314L,ORF8:Q27*,ORF8:R52I,ORF8:Y73C,S:N501Y,SA570D,SD614G,SP681H,S:T716I,SS982A,SD1118H,S:G21219C                                               | 6 | 0   |
| hCoV-19/Mexico/GUA-IndRE_FB16894_S3117/2021 | EPI_ISL_2663384 | B.1.1.7 | GRY | 39 | C241T,C913T,C2110T,C3037T,C3267T,C5388A,C5986T,T6954C,G7042T,A10195G,C14120T,C14408T,C14676T,C15279T,T16176C,G18379A,C21575T,A23063T,C23271A,A23403G,C23604A,C23709T,T24506G,G24914C,G25987A,G27604A,T27645C,C27972T,G28048T,G28075T,A28095T,A28111G,G28280C,A28281T,T28282A,G28881A,G28882A,G28883C,C28977T | N:D3L,N:R203K,N:G204R,N:S235F,ORF1a:T1001,ORF1a:A1708D,ORF1a:I2230T,ORF1a:M2259I,ORF1b:P218L,ORF1b:P314L,ORF1b:G1638S,ORF3a:D199N,O RF7a:V71I,ORF8:Q27*,ORF8:R52I,ORF8:C61F,ORF8:K68*,ORF8:Y73C,S:L5F,S:N501Y,SA570D,SD614G,SP681H,S:T716I,SS982A,SD1118H | 6 | 0   |
| hCoV-19/Mexico/GUA-IndRE_FB16899_S3118/2021 | EPI_ISL_2663385 | B.1.1.7 | GRY | 37 | A28295G,G28881A,G28882A,G28883C,C28977T                                                                                                                                                                                                                                                                      | N:D3L,N:N8D,N:R203K,N:G204R,N:S235F,ORF1a:E37D,ORF1a:Q332L,ORF1a:610L,ORF1a:L730F,ORF1a:T1001,ORF1a:A1708D,ORF1a:I2230T,ORF1a:L3116F,ORF1b:P314L,ORF8:Q27*,ORF8:R52I,ORF8:Y73C,SS98F,S:D138H,S:N501Y,S:AS70D,SD614G,SP681H,S:T716I,SS982A,SD1118H,SM1237I | 6 | 0   |
| hCoV-19/Mexico/GUA-IndRE_FB16904_S3119/2021 | EPI_ISL_2663386 | B.1.1.7 | GRY | 23 | C241T,C913T,C3037T,C3267T,C4878T,C5388A,C5986T,T6954C,G11083T,C14408T,C14676T,C15279T,T16176C,G19075A,C20436T,A23063T,C23271A,A23403G,C23604A,C23709T,T24506G,G24914C,C27005T,C27972T,G28048T,G28077A,A28111G,G28280C,A28281T,T28282A,G28881A,G28882A,G28883C,C28977T,C29095T                                | N:D3L,N:R203K,N:G204R,N:A208V,N:S235F,ORF1a:T1001,ORF1a:I538H,ORF1a:A1708D,ORF1a:I2230T,ORF1a:L316F,ORF1b:P314L,ORF8:Q27*,ORF8:R52I,ORF8:V62M,ORF8:Y73C,S:N501Y,SA570D,SD614G,SP681H,S:T716I,SS982A,SD1118H                                               | 6 | 87  |
| hCoV-19/Mexico/GUA-IndRE_FB16908_S3120/2021 | EPI_ISL_2663387 | B.1.1.7 | GRY | 34 | 28882A,G28883C,C28896T,C28977T,C29095T                                                                                                                                                                                                                                                                       | N:D3L,N:R203K,N:G204R,N:S235F,ORF1a:T1001,ORF1a:I091T,ORF1a:A1708D,ORF1a:I2230T,ORF1b:P314L,ORF8:Q27*,ORF8:R52I,ORF8:Y73C,S:N501Y,SA570D,S:N603K,SD614G,SP681H,S:T716I,SS98F,SS982A,SD1118H                                                               | 6 | 0   |
| hCoV-19/Mexico/GUA-IndRE_FB16911_S3121/2021 | EPI_ISL_2663388 | B.1.1.7 | GRY | 36 | 06G,G24914C,C27972T,G28048T,A28111G,G28280C,A28281T,T28282A,G28881A,G28882A,G28883C,C28977T,C29095T                                                                                                                                                                                                          | N:D3L,N:R203K,N:G204R,N:S235F,ORF1a:L580F,ORF1a:T1001,ORF1a:A1708D,ORF1a:I2230T,ORF1a:T4304I,ORF1b:P314L,ORF3a:G224C,ORF7a:E121T,ORF8:Q27*,ORF8:R52I,ORF8:Y73C,S:N501Y,SA570D,SD614G,SP681H,S:T716I,SS982A,SD1118H                                        | 6 | 0   |
| hCoV-19/Mexico/GUA-IndRE_FB17325_S3532/2021 | EPI_ISL_2779047 | B.1.1.7 | GRY | 40 | C241T,C913T,C2453T,C3037T,C3267T,T5152C,C5388A,C5986T,T6954C,C9611T,C14408T,C14676T,C15279T,T16176C,C21855T,G21974C,A23063T,C23271A,A23403G,C23604A,C23709T,T24506G,G24914C,G25273T,A25336C,T25711C,C28882T,C27972T,G27996A,G28048T,A28111G,G28280C,A28281T,T28282A,A28295G,C28977T,C29750T                  | N:D3L,N:N8D,N:R203K,N:G204R,N:S235F,ORF1a:L730F,ORF1a:T1001,ORF1a:A1708D,ORF1a:I2230T,ORF1a:L316F,ORF1b:P314L,ORF8:Q27*,ORF8:R52I,ORF8:Y73C,SS98F,S:D138H,S:N501Y,SA570D,SD614G,SP681H,S:T716I,SS982A,SD1118H,SM1237I,SE1258D                             | 6 | 0   |
| hCoV-19/Mexico/GUA-IndRE_FB17346_S3533/2021 | EPI_ISL_2779048 | B.1.1.7 | GRY | 33 | C241T,C913T,C2110T,C3037T,C3267T,C5388A,C5986T,G7745A,C14120T,C14408T,C14676T,C15279T,T16176C,C21855T,A23063T,C23271A,A23403G,C23604A,C23709T,T24506G,G24914C,C27972T,G28048T,A28111G,G28280C,A28281T,T28282A,G28881A,G28882A,G28883C,C28977T,C29095T                                                        | N:D3L,N:R203K,N:G204R,N:S235F,ORF1a:T1001,ORF1a:A1708D,ORF1a:I2230T,ORF1a:T4304I,ORF1b:P314L,ORF8:Q27*,ORF8:R52I,ORF8:Y73C,S:N501Y,SA570D,SD614G,SP681H,S:T716I,SS982A,SD1118H                                                                            | 6 | 351 |
| hCoV-19/Mexico/HID-IndRE_F12574_S1201/2021  | EPI_ISL_1628808 | B.1.1.7 | GRY | 37 | C241T,C913T,C3037T,C3267T,T5152C,C5388A,C5986T,T6954C,C9611T,C14408T,C14676T,C15279T,T16176C,C21855T,G21974C,A23063T,C23271A,A23403G,C23604A,C23709T,T24506G,G24914C,A25336C,C27972T,G28048T,A28111G,G28280C,A28281T,T28282A,G28282A,C28977T,G28881A,G28882A,G28883C,C28977T                                 | N:D3L,N:G5E,N:P155,N:R203K,N:G204P,N:S235F,ORF1a:T1001,ORF1a:B70D,ORF1a:I2230T,ORF1b:P314L,ORF8:Q27*,ORF8:R52I,ORF8:Y73C,ORF9a:D128I,S:N501Y,SA570D,SD614G,SP681H,S:T716I,SS982A,SD1118H,S:E1258D                                                         | 6 | 0   |
| hCoV-19/Mexico/HID-IndRE_FB13039_S1505/2021 | EPI_ISL_1805483 | B.1.1.7 | GRY | 35 | 8724T,G28881A,G28882A,G28883C,C28977T                                                                                                                                                                                                                                                                        | N:D3L,N:N8D,N:R203K,N:G204R,N:S235F,ORF1a:L730F,ORF1a:T1001,ORF1a:A1708D,ORF1a:I2230T,ORF1a:N2405S,ORF1a:L3116F,ORF1b:P314L,ORF8:Q27*,ORF8:R52I,ORF8:Y73C,SS98F,S:D138H,S:N501Y,SA570D,SD614G,SP681H,S:T716I,SS982A,SD1118H,SE1258D                       | 6 | 0   |
| hCoV-19/Mexico/HID-IndRE_FB13996_S2048/2021 | EPI_ISL_2283690 | B.1.1.7 | GRY | 36 | C241T,C913T,C2453T,C3037T,C3267T,C5388A,C5986T,T6954C,A7479G,C9611T,C14408T,C14676T,C15279T,T16176C,C21855T,G21974C,A23063T,C23271A,A23403G,C23604A,C23709T,T24506G,G24914C,C27972T,G28048T,A28111G,G28280C,A28281T,T28282A,A28295G,G28881A,G28882A,G28883C,C28977T                                          | N:D3L,N:N8D,N:R203K,N:G204R,N:S235F,ORF1a:L730F,ORF1a:T1001,ORF1a:I017I,ORF1a:A1708D,ORF1a:I2230T,ORF1a:N2405S,ORF1a:L3116F,ORF1b:P314L,ORF8:Q27*,ORF8:R52I,ORF8:Y73C,SS98F,S:D138H,S:N501Y,SA570D,SD614G,SP681H,S:T716I,SS982A,SD1118H                   | 6 | 3   |
| hCoV-19/Mexico/HID-IndRE_FB14798_S2046/2021 | EPI_ISL_2283688 | B.1.1.7 | GRY | 31 | C241T,C913T,C3037T,C3267T,C3411T,C5388A,C5986T,T6954C,C11408C,C14408T,C14676T,C15279T,T16176C,A23063T,C23271A,A23403G,C23604A,C23709T,T24506G,G24914C,C27972T,G28048T,A28111G,G28280C,A28281T,T28282A,G28881A,G28882A,G28883C,C28977T                                                                        | N:D3L,N:R203K,N:G204R,N:S235F,ORF1a:T1001,ORF1a:A1049V,ORF1a:A1708D,ORF1a:I2230T,ORF1b:P314L,ORF8:Q27*,ORF8:R52I,ORF8:Y73C,S:N501Y,S:AS70D,SD614G,SP681H,S:T716I,SS982A,SD1118H                                                                           | 6 | 0   |
| hCoV-19/Mexico/HID-IndRE_FB17212_S3094/2021 | EPI_ISL_2663361 | B.1.1.7 | GRY | 35 | 881A,G28882A,G28883C,C28977T                                                                                                                                                                                                                                                                                 | N:D3L,N:N8D,N:R203K,N:G204R,N:S235F,ORF1a:V627I,ORF1a:L730F,ORF1a:T1001,ORF1a:A1708D,ORF1a:I2230T,ORF1a:L3116F,ORF1b:P314L,ORF1b:E1728D,ORF8:Q27*,ORF8:R52I,ORF8:Y73C,SS98F,S:D138H,S:N501Y,SA570D,SD614G,SP681H,S:T716I,SS982A,SD1118H                   | 6 | 0   |
| hCoV-19/Mexico/HID-IndRE_FB17213_S3095/2021 | EPI_ISL_2663362 | B.1.1.7 | GRY | 36 | C241T,C913T,C2453T,C3037T,C3267T,C3784T,C5388A,C5986T,T6954C,A7479G,C9611T,C14408T,C14676T,C15279T,T16176C,G18651T,C21855T,G21974C,A23063T,C23271A,A23403G,C23604A,C23709T,T24506G,G24914C,C27972T,G28048T,A28111G,G28280C,A28281T,T28282A,A28295G,G28881A,G28882A,G28883C,C28977T                           | N:D3L,N:N8D,N:R203K,N:G204R,N:S235F,ORF1a:L730F,ORF1a:T1001,ORF1a:A1708D,ORF1a:I2230T,ORF1a:N2405S,ORF1a:L3116F,ORF1b:P314L,ORF8:Q27*,ORF8:R52I,ORF8:Y73C,SS98F,S:D138H,S:N501Y,SA570D,SD614G,SP681H,S:T716I,SS982A,SD1118H                               | 6 | 0   |
| hCoV-19/Mexico/HID-IndRE_FB17214_S3096/2021 | EPI_ISL_2663363 | B.1.1.7 | GRY | 35 | 1A,G28882A,G28883C,C28977T                                                                                                                                                                                                                                                                                   | N:D3L,N:N8D,N:R203K,N:G204R,N:S235F,ORF1a:V627I,ORF1a:L730F,ORF1a:T1001,ORF1a:A1708D,ORF1a:I2230T,ORF1a:L3116F,ORF1b:P314L,ORF8:Q27*,ORF8:R52I,ORF8:Y73C,SS98F,S:D138H,S:N501Y,SA570D,SD614G,SP681H,S:T716I,SS982A,SD1118H                                | 6 | 0   |
| hCoV-19/Mexico/HID-IndRE_FB17221_S3097/2021 | EPI_ISL_2663364 | B.1.1.7 | GRY | 37 | C241T,C913T,C2110T,C3037T,C3267T,C5388A,C5986T,T6954C,C9611T,C14408T,C14676T,C15279T,T16176C,C18555T,C21639A,A23063T,C23271A,A23403G,C23604A,C23709T,C24374T,T24506G,G24914C,C27972T,G28048T,A28111G,G28280C,A28281T,T28282A,G28881A,G28882A,G28883C,C28977T                                                 | N:D3L,N:R203K,N:G204R,N:S235F,ORF1a:T1001,ORF1a:A1708D,ORF1a:I2230T,ORF1a:I3038H,ORF1b:P218L,ORF1b:P314L,ORF1b:P1975S,ORF8:Q27*,ORF8:R52I,ORF8:K68*,ORF8:Y73C,S:N501Y,SA570D,SD614G,SP681H,S:T716I,SS982A,SD1118H                                         | 6 | 0   |
| hCoV-19/Mexico/HID-IndRE_FB17223_S3098/2021 | EPI_ISL_2663365 | B.1.1.7 | GRY | 21 | 5G,G28881A,G28882A,G28883C,C28977T                                                                                                                                                                                                                                                                           | N:D3L,N:R203K,N:G204R,N:S235F,ORF1a:T1001,ORF1a:A1708D,ORF1a:I2230T,ORF1a:M2259I,ORF1b:P218L,ORF1b:P314L,ORF1b:G1638S,ORF3a:D199N,O RF7a:V71I,ORF8:Q27*,ORF8:R52I,ORF8:C61F,ORF8:K68*,ORF8:Y73C,S:L5F,S:N501Y,SA570D,SD614G,SP681H,S:T716I,SS982A,SD1118H | 6 | 0   |
| hCoV-19/Mexico/HID-IndRE_FB17224_S3099/2021 | EPI_ISL_2663366 | B.1.1.7 | GRY | 31 | 048T,A28111G,G28280C,A28281T,T28282A,G28881A,G28882A,G28883C,C28977T,G29715T                                                                                                                                                                                                                                 | N:D3L,N:R203K,N:G204R,N:S235F,ORF1a:T1001,ORF1a:A1708D,ORF1a:I2230T,ORF1a:I3038H,ORF1b:P218L,ORF1b:P314L,ORF1b:P1975S,ORF8:Q27*,ORF8:R52I,ORF8:K68*,ORF8:Y73C,S:N501Y,SA570D,SD614G,SP681H,S:T716I,SS982A,SD1118H                                         | 6 | 0   |

|                                             |                 |         |     |    |                                                                                                                                                                                                                                                                                                                                                                                                                                                                                                                                                                                                           |                                                                                                                                                                                                                                                            |     |
|---------------------------------------------|-----------------|---------|-----|----|-----------------------------------------------------------------------------------------------------------------------------------------------------------------------------------------------------------------------------------------------------------------------------------------------------------------------------------------------------------------------------------------------------------------------------------------------------------------------------------------------------------------------------------------------------------------------------------------------------------|------------------------------------------------------------------------------------------------------------------------------------------------------------------------------------------------------------------------------------------------------------|-----|
| hCoV-19/Mexico/HID-INdRE_FB17225_S3100/2021 | EPI_ISL_2663367 | B.1.1.7 | GRY | 37 | C241T,C913T,C2453T,C3037T,C3267T,C3784T,C5388A,C5986T,T6954C,A7479G,C9611T,C12439 T,C14408T,C14676T,C15279T,T16176C,C21855T,G21974C,A23063T,C23271A,A23403G,C23604 A,C23709T,T24506G,G24914C,C27213T,C27972T,G28048T,A28111G,G28280C,A28281T,T2828 2A,A28295G,G28881A,G28882A,G28883C,C28977T                                                                                                                                                                                                                                                                                                             | N:D3L,N:N8D,N:R203K,N:G204R,N:S235F,ORF1a:1730F,ORF1a:T1001,ORF1a: A1708D,ORF1a:I2230T,ORF1a:N2405S,ORF1a:L3116F,ORF1b:P314L,ORF8:Q2 7*,ORF8:R52I,ORF8:Y73C,S598F,S:D138H,S:N501Y,S:A570D,S:D614G,S:P681H                                                  | 0   |
| hCoV-19/Mexico/HID-INdRE_FB17226_S3101/2021 | EPI_ISL_2663368 | B.1.1.7 | GRY | 37 | C241T,C913T,C2453T,C3037T,C3267T,C3784T,C5388A,C5986T,T6954C,A7479G,C9611T,C12439 T,C14408T,C14676T,C15279T,T16176C,C21855T,G21974C,A23063T,C23271A,A23403G,C23604 A,C23709T,T24506G,G24914C,C27213T,C27972T,G28048T,A28111G,G28280C,A28281T,T2828 2A,A28295G,G28881A,G28882A,G28883C,C28977T                                                                                                                                                                                                                                                                                                             | N:D3L,N:N8D,N:R203K,N:G204R,N:S235F,ORF1a:1730F,ORF1a:T1001,ORF1a: A1708D,ORF1a:I2230T,ORF1a:N2405S,ORF1a:L3116F,ORF1b:P314L,ORF8:Q2 7*,ORF8:R52I,ORF8:Y73C,S598F,S:D138H,S:N501Y,S:A570D,S:D614G,S:P681H                                                  | 0   |
| hCoV-19/Mexico/HID-INdRE_FB17234_S3102/2021 | EPI_ISL_2663369 | B.1.1.7 | GRY | 35 | C241T,C913T,G2144A,C2453T,C3037T,C3267T,C5388A,C5986T,T6954C,C9611T,C14408T,C1467 6T,C15279T,T16176C,G18651T,C21855T,G21974C,A23063T,C23271A,A23403G,C23604A,C237 09T,T24506G,G24914C,C27972T,G28048T,A28111G,G28280C,A28281T,T28282A,A28295G,G28 881A,G28882A,G28883C,C28977T                                                                                                                                                                                                                                                                                                                            | N:D3L,N:N8D,N:R203K,N:G204R,N:S235F,ORF1a:V627I,ORF1a:L730F,ORF1a:T 1001,ORF1a:A1708D,ORF1a:I2230T,ORF1a:L3116F,ORF1b:P314L,ORF1b:E17 28D,ORF8:Q27*,ORF8:R52I,ORF8:Y73C,S598F,S:D138H,S:N501Y,S:A570D,S D614G,S:P681H,S:T716I,S5982A,S:D1118H              | 6   |
| hCoV-19/Mexico/HID-INdRE_FB17235_S3103/2021 | EPI_ISL_2663370 | B.1.1.7 | GRY | 35 | C241T,C913T,G2144A,C2453T,C3037T,C3267T,C5388A,C5986T,T6954C,C9611T,C14408T,C1467 6T,C15279T,T16176C,G18651T,C21855T,G21974C,A23063T,C23271A,A23403G,C23604A,C237 09T,T24506G,G24914C,C27972T,G28048T,A28111G,G28280C,A28281T,T28282A,A28295G,G28 881A,G28882A,G28883C,C28977T                                                                                                                                                                                                                                                                                                                            | N:D3L,N:N8D,N:R203K,N:G204R,N:S235F,ORF1a:V627I,ORF1a:L730F,ORF1a:T 1001,ORF1a:A1708D,ORF1a:I2230T,ORF1a:L3116F,ORF1b:P314L,ORF1b:E17 28D,ORF8:Q27*,ORF8:R52I,ORF8:Y73C,S598F,S:D138H,S:N501Y,S:A570D,S D614G,S:P681H,S:T716I,S5982A,S:D1118H              | 6   |
| hCoV-19/Mexico/HID-INdRE_FB17239_S3104/2021 | EPI_ISL_2663371 | B.1.1.7 | GRY | 37 | A28295G,G28881A,G28882A,G28883C,C28977T                                                                                                                                                                                                                                                                                                                                                                                                                                                                                                                                                                   | N:D3L,N:N8D,N:R203K,N:G204R,N:S235F,ORF1a:V627I,ORF1a:L730F,ORF1a:T 1001,ORF1a:I2230T,ORF1a:N2405S,ORF1a:L3116F,ORF1b:P314L,ORF8:Q2 7*,ORF8:R52I,ORF8:Y73C,S598F,S:D138H,S:N501Y,S:A570D,S:D614G,S:P681H                                                   | 6   |
| hCoV-19/Mexico/HID-INdRE_FB17241_S3105/2021 | EPI_ISL_2663372 | B.1.1.7 | GRY | 38 | C241T,C913T,G2144A,C2453T,C3037T,C3267T,A5139G,C5388A,C5986T,T6954C,C9611T,C14408 T,C14676T,C15279T,T16176C,G18651T,C21855T,G21974C,G22471T,A23063T,C23271A,A23403 G,C23604A,C23709T,T24506G,G24914C,C25810T,C27972T,G28048T,A28111G,G28280C,A2828 1T,T28282A,A28295G,G28881A,G28882A,G28883C,C28977T                                                                                                                                                                                                                                                                                                     | N:D3L,N:N8D,N:R203K,N:G204R,N:S235F,ORF1a:V627I,ORF1a:L730F,ORF1a:T 1001,ORF1a:I2230T,ORF1a:N2405S,ORF1a:L3116F,ORF1b:P314L,ORF1b:E17 28D,ORF8:Q27*,ORF8:R52I,ORF8:Y73C,S598F,S:D138H,S:N501Y,S:A570D,S D614G,S:P681H,S:T716I,S5982A,S:D1118H              | 6   |
| hCoV-19/Mexico/HID-INdRE_FB17242_S3106/2021 | EPI_ISL_2663373 | B.1.1.7 | GRY | 38 | C241T,C913T,G2144A,C2453T,C3037T,C3267T,A5139G,C5388A,C5986T,T6954C,C9611T,C14408 T,C14676T,C15279T,T16176C,G18651T,C21855T,G21974C,G22471T,A23063T,C23271A,A23403 G,C23604A,C23709T,T24506G,G24914C,C25810T,C27972T,G28048T,A28111G,G28280C,A2828 1T,T28282A,A28295G,G28881A,G28882A,G28883C,C28977T                                                                                                                                                                                                                                                                                                     | N:D3L,N:N8D,N:R203K,N:G204R,N:S235F,ORF1a:V627I,ORF1a:L730F,ORF1a:T 1001,ORF1a:I2230T,ORF1a:N2405S,ORF1a:L3116F,ORF1b:P314L,ORF1b:E17 28D,ORF8:Q27*,ORF8:R52I,ORF8:Y73C,S598F,S:D138H,S:N501Y,S:A570D,S D614G,S:P681H,S:T716I,S5982A,S:D1118H              | 6   |
| hCoV-19/Mexico/HID-INdRE_FB17245_S3107/2021 | EPI_ISL_2663374 | B.1.1.7 | GRY | 38 | C241T,C913T,G2144A,C2453T,C3037T,C3267T,A5139G,C5388A,C5986T,T6954C,C9611T,C14408 T,C14676T,C15279T,T16176C,G18651T,C21855T,G21974C,G22471T,A23063T,C23271A,A23403 G,C23604A,C23709T,T24506G,G24914C,C25810T,C27972T,G28048T,A28111G,G28280C,A2828 1T,T28282A,A28295G,G28881A,G28882A,G28883C,C28977T                                                                                                                                                                                                                                                                                                     | N:D3L,N:N8D,N:R203K,N:G204R,N:S235F,ORF1a:V627I,ORF1a:L730F,ORF1a:T 1001,ORF1a:I2230T,ORF1a:N2405S,ORF1a:L3116F,ORF1b:P314L,ORF1b:E17 28D,ORF8:Q27*,ORF8:R52I,ORF8:Y73C,S598F,S:D138H,S:N501Y,S:A570D,S D614G,S:P681H,S:T716I,S5982A,S:D1118H              | 6   |
| hCoV-19/Mexico/HID-INdRE_FB17246_S3108/2021 | EPI_ISL_2663375 | B.1.1.7 | GRY | 40 | C241T,C913T,C2453T,C3037T,C3267T,G4207T,C5388A,C5986T,T6954C,A7479G,C9611T,G14202 A,C14408T,C14676T,C15279T,T16176C,C21855T,G21974C,C23271A,A23403G,C23604A,C2370 9T,T24506G,G24914C,C27972T,G28048T,A28111G,G28280C,A28281T,T28282A,A28295G,G288 81A,G28882A,G28883C,C28977T                                                                                                                                                                                                                                                                                                                             | N:D3L,N:N8D,N:R203K,N:G204R,N:S235F,ORF1a:1730F,ORF1a:T1001,ORF1a: A1708D,ORF1a:I2230T,ORF1a:N2405S,ORF1a:L3116F,ORF1b:P314L,ORF8:Q2 7*,ORF8:R52I,ORF8:Y73C,S598F,S:D138H,S:N501Y,S:A570D,S:D614G,S:P681H,S:T716I,S5982A,S:D1118H                          | 324 |
| hCoV-19/Mexico/HID-INdRE_FB17887_S3933/2021 | EPI_ISL_2858947 | B.1.1.7 | GR  | 35 | C241T,C913T,C2110T,C2453T,G3004T,C3037T,C3267T,C5388A,C5986T,T6954C,G7042T,C9996T, C10525T,C10789T,C14120T,C14408T,C14676T,C15279T,T16176C,C17850T,C21855T,G21974C,A23063T C23271A,A23403G,C23604A,C23709T,T24506G,G24914C,C25844T,C26110T,C26735T,C27389T,C27972T, G28048T,A28095T,A28111G,G28280C,A28281T,T28282A,A28804G,G28881A,G28882A,G28883 C,C28977T,C913T,C2453T,C3037T,C3267T,C3784T,C5388A,C5986T,T6954C,A7479G,C9611T,T9787C, G14202A,C14408T,C14676T,C15279T,T16176C,C21855T,G21974C,A23063T,C23271A,A23403G,C 23604A,C23709T,T24506G,G24914C,C27972T,G28048T,A28111G,G28280C,A28281T,T28282 | N:D3L,N:N8D,N:R203K,N:G204R,N:S235F,ORF1a:1730F,ORF1a:E913D,ORF1a:T1001, ORF1a:A1708D,ORF1a:I2230T,ORF1a:N2405S,ORF1a:L3116F,ORF1b:P314L,ORF8:Q2 7*,ORF8:R52I,ORF8:Y73C,S598F,S:D138H,S:N501Y,S:A570D,S:D614G,S:P681H,S:T716I,S5982A,S:D1118H              | 0   |
| hCoV-19/Mexico/HID-INdRE_FB19125_S4493/2021 | EPI_ISL_3033347 | B.1.1.7 | GRY | 43 | A28295G,G28881A,G28882A,G28883C,C28977T                                                                                                                                                                                                                                                                                                                                                                                                                                                                                                                                                                   | N:D3L,N:N8D,N:R203K,N:G204R,N:S235F,ORF1a:1730F,ORF1a:T1001,ORF1a: A1708D,ORF1a:I2230T,ORF1a:N2405S,ORF1a:L3116F,ORF1b:P314L,ORF8:Q2 7*,ORF8:R52I,ORF8:Y73C,S598F,S:D138H,S:N501Y,S:A570D,S:D614G,S:P681H                                                  | 0   |
| hCoV-19/Mexico/HID-INdRE_FB19127_S4494/2021 | EPI_ISL_3033348 | B.1.1.7 | GRY | 43 | A28295G,G28881A,G28882A,G28883C,C28977T                                                                                                                                                                                                                                                                                                                                                                                                                                                                                                                                                                   | N:D3L,N:N8D,N:R203K,N:G204R,N:S235F,ORF1a:1730F,ORF1a:T1001,ORF1a: A1708D,ORF1a:I2230T,ORF1a:N2405S,ORF1a:L3116F,ORF1b:P314L,ORF8:Q2 7*,ORF8:R52I,ORF8:Y73C,S598F,S:D138H,S:N501Y,S:A570D,S:D614G,S:P681H                                                  | 0   |
| hCoV-19/Mexico/HID-INdRE_FB19128_S4495/2021 | EPI_ISL_3033349 | B.1.1.7 | GRY | 43 | A28295G,G28881A,G28882A,G28883C,C28977T                                                                                                                                                                                                                                                                                                                                                                                                                                                                                                                                                                   | N:D3L,N:N8D,N:R203K,N:G204R,N:S235F,ORF1a:1730F,ORF1a:T1001,ORF1a: A1708D,ORF1a:I2230T,ORF1a:N2405S,ORF1a:L3116F,ORF1b:P314L,ORF8:Q2 7*,ORF8:R52I,ORF8:Y73C,S598F,S:D138H,S:N501Y,S:A570D,S:D614G,S:P681H                                                  | 0   |
| hCoV-19/Mexico/HID-INdRE_FB19136_S4496/2021 | EPI_ISL_3033350 | B.1.1.7 | GRY | 39 | 81T,T28282A,A28295G,G28881A,G28882A,G28883C,C28977T,G29751T                                                                                                                                                                                                                                                                                                                                                                                                                                                                                                                                               | N:D3L,N:N8D,N:R203K,N:G204R,N:S235F,ORF1a:1730F,ORF1a:T1001,ORF1a: A1708D,ORF1a:I2230T,ORF1a:N2405S,ORF1a:L3116F,ORF1b:P314L,ORF8:Q2 7*,ORF8:R52I,ORF8:Y73C,S598F,S:D138H,S:N501Y,S:A570D,S:D614G,S:P681H                                                  | 0   |
| hCoV-19/Mexico/HID-INdRE_FB19137_S4497/2021 | EPI_ISL_3033351 | B.1.1.7 | GRY | 37 | A28295G,G28881A,G28882A,G28883C,C28977T                                                                                                                                                                                                                                                                                                                                                                                                                                                                                                                                                                   | N:D3L,N:N8D,N:R203K,N:G204R,N:S235F,ORF1a:1730F,ORF1a:T1001,ORF1a: A1708D,ORF1a:I2230T,ORF1a:N2405S,ORF1a:L3116F,ORF1b:P314L,ORF8:Q2 7*,ORF8:R52I,ORF8:Y73C,S598F,S:D138H,S:N501Y,S:A570D,S:D614G,S:P681H                                                  | 0   |
| hCoV-19/Mexico/HID-INdRE_FB19139_S4498/2021 | EPI_ISL_3033352 | B.1.1.7 | GRY | 43 | G28048T,A28095T,A28111G,G28280C,A28281T,T28282A,A28804G,G28881A,G28882A,G28883 C,C28977T,C913T,C2453T,C3037T,C3267T,C3784T,C5388A,C5986T,T6954C,A7479G,C9611T,C14408 T,C14676T,C15279T,T16176C,C21855T,G21974C,A23063T,C23271A,A23403G,C23604A,C23709 T,T24506G,G24914C,C27972T,G28048T,A28111G,G28280C,A28281T,T28282A,A28295G,G288 81A,G28882A,G28883C,C28977T                                                                                                                                                                                                                                          | N:D3L,N:N8D,N:R203K,N:G204R,N:S235F,ORF1a:1730F,ORF1a:T1001,ORF1a: A1708D,ORF1a:I2230T,ORF1a:N2405S,ORF1a:L3116F,ORF1b:P314L,ORF8:Q2 7*,ORF8:R52I,ORF8:Y73C,S598F,S:D138H,S:N501Y,S:A570D,S:D614G,S:P681H                                                  | 0   |
| hCoV-19/Mexico/HID-INMEGEN-05-02-116/2021   | EPI_ISL_2230873 | B.1.1.7 | GRY | 35 | 1A,G28882A,G28883C,C28977T                                                                                                                                                                                                                                                                                                                                                                                                                                                                                                                                                                                | N:D3L,N:N8D,N:R203K,N:G204R,N:S235F,ORF1a:1730F,ORF1a:T1001,ORF1a: P1220L,ORF1a:A1708D,ORF1a:I2230T,ORF1a:N2405S,ORF1a:L3116F,ORF1b:P 314L,ORF3a:I35T,ORF8:Q27*,ORF8:R52I,ORF8:Y73C,S598F,S:D138H,S:N501Y, S:A570D,S:D614G,S:P681H,S:T716I,S5982A,S:D1118H | 6   |
| hCoV-19/Mexico/HID-INMEGEN-05-02-154/2021   | EPI_ISL_2230876 | B.1.1.7 | GRY | 37 | A28295G,G28881A,G28882A,G28883C,C28977T                                                                                                                                                                                                                                                                                                                                                                                                                                                                                                                                                                   | N:D3L,N:N8D,N:R203K,N:G204R,N:S235F,ORF1a:1730F,ORF1a:T1001,ORF1a: P1220L,ORF1a:A1708D,ORF1a:I2230T,ORF1a:N2405S,ORF1a:L3116F,ORF1b:P 314L,ORF3a:I35T,ORF8:Q27*,ORF8:R52I,ORF8:Y73C,S598F,S:D138H,S:N501Y, S:A570D,S:D614G,S:P681H,S:T716I,S5982A,S:D1118H | 6   |
| hCoV-19/Mexico/HID-INMEGEN-05-02-171/2021   | EPI_ISL_2230878 | B.1.1.7 | GRY | 40 | G28280C,A28281T,T28282A,A28295G,G28881A,G28882A,G28883C,C28977T                                                                                                                                                                                                                                                                                                                                                                                                                                                                                                                                           | N:D3L,N:N8D,N:R203K,N:G204R,N:S235F,ORF1a:1730F,ORF1a:T1001,ORF1a: P1220L,ORF1a:A1708D,ORF1a:I2230T,ORF1a:N2405S,ORF1a:L3116F,ORF1b:P 314L,ORF3a:I35T,ORF8:Q27*,ORF8:R52I,ORF8:Y73C,S598F,S:D138H,S:N501Y, S:A570D,S:D614G,S:P681H,S:T716I,S5982A,S:D1118H | 2   |



|                                             |                 |         |     |    |                                                                                                                                                                                                                                                                                                                                                                                                                                                                                                                                   |    |                                                                                                                                                                                                                                                                         |   |      |
|---------------------------------------------|-----------------|---------|-----|----|-----------------------------------------------------------------------------------------------------------------------------------------------------------------------------------------------------------------------------------------------------------------------------------------------------------------------------------------------------------------------------------------------------------------------------------------------------------------------------------------------------------------------------------|----|-------------------------------------------------------------------------------------------------------------------------------------------------------------------------------------------------------------------------------------------------------------------------|---|------|
| hCoV-19/Mexico/HID-INMEGEN-05-02-179/2021   | EPI_ISL_2230885 | B.1.1.7 | GRY | 37 | C241T,C913T,G1400A,C2110T,C3037T,C3267T,C5388A,C5986T,T6954C,G7042T,G9929A,A10195G,C14210T,C14408T,C14676T,C15279T,T16176C,A23063T,C23271A,A23403G,C23604A,C23709T,T24506G,G24914C,C27972T,G28048T,G2805T,A28095T,A28111G,G28280C,A28281T,T28282A,T28282A,G28881A,G28882A,G28883C,C28977T                                                                                                                                                                                                                                         | 24 | N:D3L:N:R203K,N:G204R,N:S235F,ORF1a:G379R,ORF1a:T1001,ORF1a:A1708D,ORF1a:I2230T,ORF1a:M2259,ORF1a:K322N,ORF1b:P218L,ORF1b:P314L,ORF8:Q27*,ORF8:R52I,ORF8:C61F,ORF8:K68*,ORF8:Y73C,S:N501Y,S:A570D,S:D614G,S:P681H,S:T716I,S:S982A,S:D1118H                              | 6 | 0    |
| hCoV-19/Mexico/HID-INMEGEN-05-03-156/2021   | EPI_ISL_2319289 | B.1.1.7 | GRY | 39 | C241T,C913T,C3037T,C3267T,C3704T,C5388A,C5986T,T6954C,G6986A,A12162G,C14408T,C14676T,C15279T,C15270T,T16176C,A17615G,A21137G,T22020C,A23063T,C23271A,A23403G,C23604A,C23709T,T24506G,G24914C,G25135T,A27003G,C27972T,G28048T,A28111G,G28280C,A28281T,T28282A,G28881A,G28882A,G28883C,C28977T,C29280T                                                                                                                                                                                                                              | 27 | M:H161V,N:D3L:N:R203K,N:G204R,N:S235F,N:A336V,ORF1a:T1001,ORF1a:P147S,ORF1a:A1708D,ORF1a:I2230T,ORF1a:G2241S,ORF1a:Q3966R,ORF1b:P314L,ORF1b:K1383R,ORF1b:K2557R,ORF8:Q27*,ORF8:R52I,ORF8:Y73C,S:M151T,S:N501Y,S:A570D,S:D614G,S:P681H,S:T716I,S:S982A,S:D1118H,S:K1191N | 6 | 94   |
| hCoV-19/Mexico/HID-INMEGEN-05-03-157/2021   | EPI_ISL_2319290 | B.1.1.7 | GR  | 37 | C241T,C913T,C3037T,C3267T,C3704T,C5388A,C5986T,T6954C,G6986A,A12162G,C14408T,C14676T,C15279T,C15720T,T16176C,A17615G,A21137G,T22020C,C23271A,A23403G,C23604A,C23709T,T24506G,G24904A,G24914C,G25135T,A27003G,C27972T,G28048T,A28111G,G28280C,A28281T,T28282A,G28881A,G28882A,G28883C,C28977T,C29280T                                                                                                                                                                                                                              | 26 | M:H161V,N:D3L:N:R203K,N:G204R,N:S235F,N:A336V,ORF1a:T1001,ORF1a:P147S,ORF1a:A1708D,ORF1a:I2230T,ORF1a:G2241S,ORF1a:Q3966R,ORF1b:P314L,ORF1b:K1383R,ORF1b:K2557R,ORF8:Q27*,ORF8:R52I,ORF8:Y73C,S:M151T,S:A570D,S:D614G,S:P681H,S:T716I,S:S982A,S:D1118H,S:K1191N         | 4 | 2993 |
| hCoV-19/Mexico/HID-INMEGEN-05-03-160/2021   | EPI_ISL_2319293 | B.1.1.7 | GR  | 36 | C241T,C913T,C3037T,C3267T,C5388A,C5986T,C6196T,C6730T,A8848G,A11477C,C14408T,C14676T,C15279T,T16176C,C23271A,A23403G,C23604A,C23709T,T24506G,G24914C,G2517T,G25489C,C26464T,G26727T,C27972T,G28048T,A28111G,G28280C,A28281T,T28282A,G2881A,G28882A,G28883C,C28977T,G29715T                                                                                                                                                                                                                                                        | 20 | M:A695,N:D3L:N:R203K,N:G204R,N:S235F,ORF1a:T1001,ORF1a:A1708D,ORF1a:I2230T,ORF1b:P314L,ORF1b:A33P,ORF8:Q27*,ORF8:R52I,ORF8:Y73C,S:A570D,S:D614G,S:P681H,S:T716I,S:S982A,S:D1118H,S:G1219C                                                                               | 6 | 1328 |
| hCoV-19/Mexico/HID-INMEGEN-05-03-29/2021    | EPI_ISL_2319191 | B.1.1.7 | GRY | 38 | C241T,C913T,C3037T,C3267T,C5388A,C5944T,C5986T,C6026T,T6954C,C9967T,C13585T,C14408T,C14676T,T15096C,C15279T,T16176C,G18412T,C19983T,C22987T,A23063T,C23271A,A23403G,C23604A,C23709T,T24506G,G24914C,C27972T,G28048T,A28095T,A28111G,G28280C,A28281T,T28282A,G28881A,G28882A,G28883C,C28977T                                                                                                                                                                                                                                       | 21 | N:D3L:N:R203K,N:G204R,N:S235F,ORF1a:T1001,ORF1a:A1708D,ORF1a:P1921S,ORF1a:I2230T,ORF1b:P314L,ORF1b:V1649F,ORF8:Q27*,ORF8:R52I,ORF8:K68*,ORF8:Y73C,S:N501Y,S:A570D,S:D614G,S:P681H,S:T716I,S:S982A,S:D1118H                                                              | 6 | 80   |
| hCoV-19/Mexico/HID-INMEGEN-05-03-32/2021    | EPI_ISL_2319193 | B.1.1.7 | G   | 26 | A82111G,G28280C,A28281T,T28282A,C28977T                                                                                                                                                                                                                                                                                                                                                                                                                                                                                           | 17 | N:D3L:N:S235F,ORF1a:T1001,ORF1a:A1708D,ORF1a:I2230T,ORF1b:P314L,ORF1b:V1649F,ORF8:Q27*,ORF8:R52I,ORF8:K68*,ORF8:Y73C,S:A570D,S:D614G,S:P681H,S:T716I,S:S982A,S:D1118H                                                                                                   | 6 | 2595 |
| hCoV-19/Mexico/HID-INMEGEN-05-04-25/2021    | EPI_ISL_2349903 | B.1.1.7 | GRY | 38 | C241T,C913T,C2453T,C3037T,C3267T,C3784T,C3924T,C5388A,C5986T,T6954C,A7479G,C9611T,C14408T,C14676T,C15279T,T16176C,C21855T,G21974C,A23063T,C23271A,A23403G,C23604A,C23709T,T24506G,G24914C,G25496C,C27972T,C28011T,G28048T,A28111G,G28280C,A28281T,T28282A,A28295G,G28881A,G28882A,G28883C,C28977T                                                                                                                                                                                                                                 | 27 | N:N8D,N:A156S,N:R203K,N:G204R,N:S235F,ORF1a:1730F,ORF1a:T1001,ORF1a:P1220L,ORF1a:A1708D,ORF1a:I2230T,ORF1a:N2405S,ORF1a:K3116F,ORF1b:P314L,ORF3a:I35T,ORF8:Q27*,ORF8:H40Y,ORF8:R52I,ORF8:Y73C,S:S98F,S:D138H,S:N501Y,S:A570D,S:D614G,S:P681H,S:T716I,S:S982A,S:D1118H   | 6 | 235  |
| hCoV-19/Mexico/HID-INMEGEN-05-04-37/2021    | EPI_ISL_2349913 | B.1.1.7 | GRY | 37 | G28739T,G2881A,G28882A,G28883C,C28977T                                                                                                                                                                                                                                                                                                                                                                                                                                                                                            | 27 | N:N8D,N:A156S,N:R203K,N:G204R,N:S235F,ORF1a:1730F,ORF1a:T1001,ORF1a:P1220L,ORF1a:A1708D,ORF1a:I2230T,ORF1a:N2405S,ORF1a:K3116F,ORF1b:P314L,ORF3a:I35T,ORF8:Q27*,ORF8:H40Y,ORF8:R52I,ORF8:Y73C,S:S98F,S:D138H,S:N501Y,S:A570D,S:D614G,S:P681H,S:T716I,S:S982A,S:D1118H   | 6 | 3    |
| hCoV-19/Mexico/HID-INMEGEN-05-05-14/2021    | EPI_ISL_2444484 | B.1.1.7 | GRY | 36 | C241T,C913T,C2453T,C3037T,C3267T,C3784T,C5388A,C5986T,T6954C,A7479G,C9611T,C14408T,C14676T,C15279T,T16176C,C18959T,C21855T,G21974C,A23063T,C23271A,A23403G,C23604A,C23709T,T24506G,G24914C,C27972T,G28048T,A28111G,G28280C,A28281T,T28282A,A28295G,G28881A,G28882A,G28883C,C28977T                                                                                                                                                                                                                                                | 25 | N:D3L:N:N8D,N:R203K,N:G204R,N:S235F,ORF1a:1730F,ORF1a:T1001,ORF1a:I2230T,ORF1b:P314L,ORF3a:I35T,ORF8:Q27*,ORF8:H40Y,ORF8:R52I,ORF8:Y73C,S:S98F,S:D138H,S:N501Y,S:A570D,S:D614G,S:P681H,S:T716I,S:S982A,S:D1118H                                                         | 6 | 0    |
| hCoV-19/Mexico/HID-INMEGEN-05-05-71/2021    | EPI_ISL_2444449 | B.1.1.7 | G   | 30 | T2972T,G28048T,A28095T,A28111G,G28280C,A28281T,T28282A,G28300T,C28977T                                                                                                                                                                                                                                                                                                                                                                                                                                                            | 20 | A570D,S:D614G,S:A653Y,S:P681H,S:T716I,S:S982A,S:D1118H                                                                                                                                                                                                                  | 6 | 1237 |
| hCoV-19/Mexico/HID-INMEGEN-05-06-37/2021    | EPI_ISL_2603814 | B.1.1.7 | GRY | 34 | C241T,C913T,C3037T,C3267T,A3492G,C5388A,C5986T,T6954C,C14408T,C14676T,C15279T,T16176C,C18555T,C21639A,A23063T,C23271A,A23403G,C23604A,C23709T,C24374T,T24506G,G24616T,G24914C,C27972T,G28048T,A28111G,G28280C,A28281T,T28282A,G28881A,G28882A,C241T,C913T,C2110T,C3037T,C3267T,G4300A,C5388A,C5986T,T6954C,T7984C,C10450T,C14120T,C14408T,C14676T,C15279T,T16176C,C19390T,A23063T,C23271A,A23403G,C23604A,C23709T,T24506G,G24914C,A27237G,C27972T,G28048T,A28095T,A28111G,G28280C,A28281T,T28282A,G28881A,G28882A,G28883C,C28977T | 21 | S01Y,S:A570D,S:D614G,S:P681H,S:T716I,S:S98F,S:S982A,S:D1118H                                                                                                                                                                                                            | 6 | 0    |
| hCoV-19/Mexico/HID-INMEGEN-06-03-153/2021   | EPI_ISL_2928491 | B.1.1.7 | GRY | 36 | 82A,G28881A,G28882A,G28883C,C28977T                                                                                                                                                                                                                                                                                                                                                                                                                                                                                               | 22 | N:D3L:N:R203K,N:G204R,N:S235F,ORF1a:T1001,ORF1a:A1708D,ORF1a:I2230T,ORF1b:P218L,ORF1b:P314L,ORF8:Q27*,ORF8:R52I,ORF8:K68*,ORF8:Y73C,O:R8:F120L,S:N501Y,S:A570D,S:D614G,S:P681H,S:T716I,S:S982A,S:D1118H                                                                 | 6 | 389  |
| hCoV-19/Mexico/HID-INMEGEN-06-03-173/2021   | EPI_ISL_2928492 | B.1.1.7 | GRY | 35 | G91T,C241T,C913T,C2453T,C3037T,C3267T,C3784T,C5388A,C5986T,T6954C,A7479G,C9611T,C12439T,C14408T,C14676T,C15279T,T16176C,C21855T,G21974C,A23063T,C23271A,A23403G,C23604A,C23709T,T24506G,G24914C,C27972T,G28048T,A28095T,A28111G,G28280C,A28281T,T28282A,A28295G,G28881A,G28882A,G28883C,C28977T                                                                                                                                                                                                                                   | 25 | N:D3L:N:N8D,N:R203K,N:G204R,N:S235F,N:V392L,ORF1a:1730F,ORF1a:T1001,ORF1a:A1708D,ORF1a:I2230T,ORF1a:N2405S,ORF1a:K3116F,ORF1b:P314L,ORF8:Q27*,ORF8:R52I,ORF8:Y73C,S:S98F,S:D138H,S:N501Y,S:A570D,S:D614G,S:P681H,S:T716I,S:S982A,S:D1118H                               | 6 | 1169 |
| hCoV-19/Mexico/HID-INMEGEN-06-03-186/2021   | EPI_ISL_2810168 | B.1.1.7 | GRY | 38 | 28295G,G2881A,G28882A,G28883C,C28977T,G29447T                                                                                                                                                                                                                                                                                                                                                                                                                                                                                     | 24 | N:D3L:N:A119P,N:R203K,N:G204R,N:S235F,ORF1a:T1001,ORF1a:A1708D,ORF1a:I2230T,ORF1a:Q3966R,ORF1b:P314L,ORF1b:K1383R,ORF1b:K2557R,ORF3a:P240S,ORF8:Q27*,ORF8:R52I,ORF8:Y73C,S:N501Y,S:A570D,S:D614G,S:P681H,S:T716I,S:S982A,S:D1118H,S:K1191N                              | 6 | 0    |
| hCoV-19/Mexico/JAL-INdRE_F11689_S895/2021   | EPI_ISL_1423505 | B.1.1.7 | GRY | 35 | G28881A,G28882A,G28883C,C28977T                                                                                                                                                                                                                                                                                                                                                                                                                                                                                                   | 24 | N:D3L:N:R203K,N:G204R,N:S235F,ORF1a:1730F,ORF1a:T1001,ORF1a:A1708D,ORF1a:I2230T,ORF1a:M2259,ORF1b:P218L,ORF1b:P314L,ORF3a:P240S,ORF8:Q27*,ORF8:R52I,ORF8:Y73C,S:S98F,S:D138H,S:N501Y,S:A570D,S:D614G,S:P681H,S:T716I,S:S982A,S:D1118H                                   | 6 | 0    |
| hCoV-19/Mexico/JAL-INdRE_FB13392_S1763/2021 | EPI_ISL_2101902 | B.1.1.7 | GRY | 36 | G28881A,G28882A,G28883C,C28977T                                                                                                                                                                                                                                                                                                                                                                                                                                                                                                   | 24 | 614G,S:P681H,S:T716I,S:S982A,S:D1118H                                                                                                                                                                                                                                   | 6 | 0    |
| hCoV-19/Mexico/JAL-INdRE_FB13396_S1730/2021 | EPI_ISL_2101869 | B.1.1.7 | GRY | 36 | 28882A,G28881A,G28883C,C28977T                                                                                                                                                                                                                                                                                                                                                                                                                                                                                                    | 25 | N:D3L:N:A90S,N:R203K,N:G204R,N:G212V,N:L219F,N:S235F,ORF1a:T1001,ORF1a:A1708D,ORF1a:I2230T,ORF1a:V3748I,ORF1a:P314L,ORF3a:P104S,ORF8:Q27*,ORF8:R52I,ORF8:Y73C,ORF8b:86G,S:N501Y,S:A570D,S:D614G,S:P681H,S:T716I,S:S982A,S:D1118H,S:E1258D                               | 6 | 176  |
| hCoV-19/Mexico/JAL-INdRE_FB13967_S1756/2021 | EPI_ISL_2101895 | B.1.1.7 | GRY | 34 | 8882A,G28883C,C28977T                                                                                                                                                                                                                                                                                                                                                                                                                                                                                                             | 24 | N:D3L:N:N8D,N:R203K,N:G204R,N:S235F,ORF1a:1730F,ORF1a:T1001,ORF1a:A1708D,ORF1a:I2230T,ORF1a:K3116F,ORF1b:P314L,ORF7a:P84S,ORF8:Q27*,ORF8:R52I,ORF8:Y73C,S:S98F,S:D138H,S:N501Y,S:A570D,S:D614G,S:P681H,S:T716I,S:S982A,S:D1118H                                         | 6 | 0    |
| hCoV-19/Mexico/JAL-INdRE_FB13972_S1752/2021 | EPI_ISL_2101891 | B.1.1.7 | GRY | 35 | 8881A,G28882A,G28883C,C28977T                                                                                                                                                                                                                                                                                                                                                                                                                                                                                                     | 24 | T716I,S:S982A,S:D1118H                                                                                                                                                                                                                                                  | 6 | 0    |
| hCoV-19/Mexico/JAL-INdRE_FB14113_S1761/2021 | EPI_ISL_2101900 | B.1.1.7 | GRY | 35 | 881A,G28882A,G28883C,C28977T                                                                                                                                                                                                                                                                                                                                                                                                                                                                                                      | 24 | N:D3L:N:N8D,N:R203K,N:G204R,N:S235F,ORF1a:1730F,ORF1a:T1001,ORF1a:A1708D,ORF1a:I2230T,ORF1a:K3116F,ORF1b:P314L,ORF7a:P84S,ORF8:Q27*,ORF8:R52I,ORF8:Y73C,S:S98F,S:D138H,S:N501Y,S:A570D,S:D614G,S:P681H,S:T716I,S:S982A,S:D1118H                                         | 6 | 0    |



|                                           |                 |         |     |    |                                                                                                                                                                                                                                                                                                                                                                                                                                                                                                         |                                                                                                                                                                                                                                                                            |    |      |
|-------------------------------------------|-----------------|---------|-----|----|---------------------------------------------------------------------------------------------------------------------------------------------------------------------------------------------------------------------------------------------------------------------------------------------------------------------------------------------------------------------------------------------------------------------------------------------------------------------------------------------------------|----------------------------------------------------------------------------------------------------------------------------------------------------------------------------------------------------------------------------------------------------------------------------|----|------|
| hCoV-19/Mexico/MEX-INMEGEN-05-01-366/2021 | EPI_ISL_2105867 | B.1.1.7 | GR  | 40 | C241T,C913T,C2110T,C2918T,C3037T,C3267T,C5388A,C5986T,T6954C,G7042T,T9519C,A10195 G,C10279T,C11514T,C14120T,C14408T,C14676T,C15279T,T16176C,G16887T,G17427T,C20313 T,C23271A,A23403G,C23604A,C23709T,T24506G,G24914C,C27972T,G28048T,G28075T,A2809 5T,A28111G,G28280C,A28281T,T28282A,G28881A,G28882A,G28883C,C28977T                                                                                                                                                                                   | N:D3L:N:R203K,N:G204R,N:S235F,ORF1a:P8855,ORF1a:T1001,ORF1a:A1708 D,ORF1a:I2230T,ORF1a:M2259,ORF1a:F3085,ORF1a:T3750,ORF1b:P218L,OR F1b:P314L,ORF8:Q27*,ORF8:R52I,ORF8:G61F,ORF8:K68*,ORF8:Y73C,S:A570                                                                     | 6  | 550  |
| hCoV-19/Mexico/MEX-INMEGEN-05-02-1/2021   | EPI_ISL_2230865 | B.1.1.7 | GRY | 42 | G174T,G210T,C241T,C913T,C1420T,C2453T,C3037T,C3267T,C5388A,C5986T,C6445T,T6954C,T9 016C,C9661T,C10125T,G13514A,C14408T,T14565C,C14676T,C15279T,T16176C,T17803G,G217 7T,A23063T,C23271A,A23403G,C23604A,C23709T,T24506G,G24914C,C27883T,C27972T,G28 048T,A28111G,G28280C,A28281T,T28282A,G28881A,G28882A,G28883C,C28977T,G29212T                                                                                                                                                                         | N:D3L:N:R203K,N:G204R,N:S235F,ORF1a:I2230T,ORF1a:T3750,ORF1a:T1001,ORF1a:A1708 D,ORF1a:I2230T,ORF1a:T3287I,ORF1b:G16D,ORF1b:P314L,ORF1b:S1446A,OR F7b:A43V,ORF8:Q27*,ORF8:R52I,ORF8:Y73C,S:G72Y,S:N501Y,S:A570D,S:D614G,S:P681H,S:T716I,S:S982A,S:D1118H                   | 24 | 0    |
| hCoV-19/Mexico/MEX-INMEGEN-05-02-104/2021 | EPI_ISL_2230871 | B.1.1.7 | GRY | 36 | C241T,C913T,C3037T,C3267T,C5388A,C5986T,C6196T,T6954C,A8848G,C14408T,C1467 6T,C15279T,T16176C,C19017T,A23063T,C23271A,A23403G,C23604A,C23709T,T24506G,G2491 4C,G25217T,G26727T,C27972T,G28048T,A28111G,G28280C,A28281T,T28282A,G28881A,G288 82A,G28883C,C28977T,G29260T,G29715T                                                                                                                                                                                                                         | M:A69S,N:D3L:N:R203K,N:G204R,N:S235F,ORF1a:T1001,ORF1a:A1708D,ORF 1a:I2230T,ORF1b:P314L,ORF8:Q27*,ORF8:R52I,ORF8:Y73C,S:N501Y,S:A570D, S:D614G,S:P681H,S:T716I,S:S982A,S:D1118H,S:G1219C                                                                                   | 6  | 24   |
| hCoV-19/Mexico/MEX-INMEGEN-05-02-135/2021 | EPI_ISL_2230832 | B.1.1.7 | GRY | 34 | C241T,C913T,C3037T,C3267T,G4261A,C4423T,C5025T,C5388A,C5986T,T6954C,C14408T,C1467 6T,T15096C,C15279T,T16176C,G21604T,A23063T,C23271A,A23403G,C23604A,C23709T,T2450 6G,G24914C,C27972T,G28048T,A28095T,A28111G,G28280C,A28281T,T28282A,G28881A,G28 82A,C241T,C913T,C3037T,C3267T,C5388A,C5944T,C5986T,T6954C,C9967T,C13585T,C14408T,C146 76T,T15096C,C15279T,T16176C,A17344G,G18412T,C2987T,A23063T,C23271A,A23403G,C236 04A,C23709T,T24506G,G24914C,C27972T,G28048T,A28095T,A28111G,G28280C,A28281T,T28 | N:D3L:N:R203K,N:G204R,N:S235F,ORF1a:T1001,ORF1a:S1587I,ORF1a:A1708 D,ORF1a:I2230T,ORF1b:P314L,ORF7a:F63H,ORF8:Q27*,ORF8:R52I,ORF8:K68* 8*,ORF8:Y73C,S:Q14H,S:N501Y,S:A570D,S:D614G,S:P681H,S:T716I,S:S982A,S:D1                                                            | 6  | 573  |
| hCoV-19/Mexico/MEX-INMEGEN-05-02-162/2021 | EPI_ISL_2230883 | B.1.1.7 | GRY | 37 | 282A,G28881A,G28882A,G28883C,G28884C,C28977T                                                                                                                                                                                                                                                                                                                                                                                                                                                            | N:D3L:N:R203K,N:G204P,N:S235F,ORF1a:T1001,ORF1a:A1708D,ORF1a:I2230 T,ORF1b:P314L,ORF1b:I1293V,ORF1b:V1649F,ORF8:Q27*,ORF8:R52I,ORF8:K6 8*,ORF8:Y73C,S:N501Y,S:A570D,S:D614G,S:P681H,S:T716I,S:S982A,S:D1118H                                                               | 21 | 0    |
| hCoV-19/Mexico/MEX-INMEGEN-05-02-166/2021 | EPI_ISL_2230877 | B.1.1.7 | GRY | 36 | 8436T,G28881A,G28882A,G28883C,C28977T                                                                                                                                                                                                                                                                                                                                                                                                                                                                   | N:D3L:N:N8D,N:A55S,N:R203K,N:G204R,N:S235F,ORF1a:I730F,ORF1a:T1001I, ORF1a:A1708D,ORF1a:I2230T,ORF1a:L3116F,ORF1b:P314L,ORF3a:S165F,ORF 8:Q27*,ORF8:R52I,ORF8:Y73C,S:S98F,S:D138H,S:N501Y,S:A570D,S:D614G,S,P 681H,S:T716I,S:S982A,S:D1118H                                | 25 | 14   |
| hCoV-19/Mexico/MEX-INMEGEN-05-02-168/2021 | EPI_ISL_2230806 | B.1.1.7 | GR  | 23 | 28881A,G28882A,G28883C,C28977T,C29642T                                                                                                                                                                                                                                                                                                                                                                                                                                                                  | EV58F,N:D3L:N:R203K,N:G204R,N:S235F,ORF1a:T1001,ORF1a:A1708D,ORF1 a:I2230T,ORF1b:P314L,ORF3a:W131C,ORF7a:T810F,ORF8:Q27*,ORF8:R52I,ORF 8:K68*,ORF8:Y73C,S:A570D,S:D614G,S:P681H,S:T716I,S:S982A,S:D1                                                                       | 23 | 1299 |
| hCoV-19/Mexico/MEX-INMEGEN-05-02-175/2021 | EPI_ISL_2230825 | B.1.1.7 | GR  | 37 | A28295G,G28881A,G28882A,G28883C,C28977T                                                                                                                                                                                                                                                                                                                                                                                                                                                                 | N:D3L:N:N8D,N:R203K,N:G204R,N:S235F,ORF1a:I730F,ORF1a:T1001I,ORF1a: P1220L,ORF1a:A1708D,ORF1a:I2230T,ORF1a:N2405S,ORF1a:L3116F,ORF1b:P 314L,ORF3a:I35T,ORF8:Q27*,ORF8:H40Y,ORF8:R52I,ORF8:Y73C,S:S98F,S:D138 H,S:A570D,S:D614G,S:P681H,S:T716I,S:S982A,S:D1118H            | 26 | 722  |
| hCoV-19/Mexico/MEX-INMEGEN-05-02-187/2021 | EPI_ISL_2230879 | B.1.1.7 | GRY | 39 | G174T,G210T,C241T,C913T,C1420T,C2453T,C3037T,C3267T,C5388A,C5986T,T6954C,T9016C,C9 661T,C14408T,T14565C,C14676T,C15279T,T16176C,T17803G,G20931T,A23063T,C23271A,A23 403G,C23604A,C23709T,T24506G,G24914C,C27883T,C27972T,G28048T,A28111G,G28280C,A2 8281T,T28282A,G28272T,G28881A,G28882A,G28883C,C28977T                                                                                                                                                                                               | N:D3L:N:A152S,N:R203K,N:G204R,N:S235F,ORF1a:I730F,ORF1a:T1001I,ORF1 a:A1708D,ORF1a:I2230T,ORF1b:P314L,ORF1b:S1446A,ORF7b:A43V,ORF8:Q2 7*,ORF8:R52I,ORF8:Y73C,S:N501Y,S:A570D,S:D614G,S:P681H,S:T716I,S:S982A,S                                                             | 6  | 1    |
| hCoV-19/Mexico/MEX-INMEGEN-05-02-2/2021   | EPI_ISL_2230866 | B.1.1.7 | GRY | 36 | C241T,C913T,C3037T,C3267T,C5388A,C5986T,C6196T,T6954C,A8848G,C14408T,C14676T,C152 79T,T16176C,C18568T,G19656T,A23063T,C23271A,A23403G,C23604A,C23709T,T24506G,G24 914C,G25217T,G26428T,G26727T,C27972T,G28048T,A28111G,G28280C,A28281T,T28282A,G                                                                                                                                                                                                                                                        | N:A69S,N:D3L:N:R203K,N:G204R,N:S235F,ORF1a:T1001,ORF1a:A170 8D,ORF1a:I2230T,ORF1b:P314L,ORF8:Q27*,ORF8:R52I,ORF8:Y73C,S:N501Y,S:A570D,S:D614G,S:P681H,S:T716I,S:S982A,S                                                                                                    | 23 | 0    |
| hCoV-19/Mexico/MEX-INMEGEN-05-02-23/2021  | EPI_ISL_2230841 | B.1.1.7 | GRY | 33 | G217T,G25538A,G26727T,C27972T,G28048T,A28111G,G28280C,A28281T,T28282A,G28881A,G28 882A,G28883C,C28977T                                                                                                                                                                                                                                                                                                                                                                                                  | M:V70L,N:D3L:N:R203K,N:G204R,N:S235F,ORF1a:T1001,ORF1a:P1640S,ORF 1a:A1708D,ORF1a:I2230T,ORF1a:A220V,ORF1b:P314L,ORF1b:L1383R,ORF1 b:A1662V,ORF1b:D2499N,ORF1b:K2553F,ORF3a:W131C,ORF8:Q27*,ORF8:R 52I,ORF8:Y73C,S:N501Y,S:A570D,S:D614G,S:P681H,S:T716I,S:S982A,S:D1118 H | 20 | 521  |
| hCoV-19/Mexico/MEX-INMEGEN-05-02-24/2021  | EPI_ISL_2230867 | B.1.1.7 | GRY | 35 | C241T,C913T,C3037T,C3267T,C5388A,C5986T,T6954C,G8102A,C14408T,C14676 T,T15096C,C15279T,T16176C,C19164T,C20104T,G21893A,A23063T,C23271A,A23403G,C23604 A,C23709T,T24506G,G24914C,C25096T,G25437C,G27375A,C27972T,G28048T,A28095T,A281 1G,G28280C,A28281T,T28282A,G28881A,G28882A,G28883C,C28977T                                                                                                                                                                                                         | N:D3L:N:R203K,N:G204R,N:S235F,ORF1a:R232H,ORF1a:T592I,ORF1a:T1001I, ORF1a:A1708D,ORF1a:I2230T,ORF1a:V2613I,ORF1b:P314L,ORF1b:L2213F,OR F3a:L15F,ORF6:MS8I,ORF8:Q27*,ORF8:R52I,ORF8:K68*,ORF8:Y73C,S:D111N,S, S:N501Y,S:A570D,S:D614G,S:P681H,S:T716I,S:S982A,S:D1118H      | 6  | 38   |
| hCoV-19/Mexico/MEX-INMEGEN-05-02-47/2021  | EPI_ISL_2230881 | B.1.1.7 | GRY | 39 | C203T,C241T,C355T,C913T,C3037T,C3267T,C5183T,C5388A,C5986T,T6954C,T8053C,C9924T,C1 4408T,C14676T,C15279T,C15933T,T16176C,A17615G,C18452T,G20962A,A21137G,A23063T,C 3271A,A23403G,C23604A,C23709T,T24506G,G24914C,G25785T,G26730C,C26768T,C27972T,G                                                                                                                                                                                                                                                      | M:V70L,N:D3L:N:R203K,N:G204R,N:S235F,ORF1a:T1001,ORF1a:P1640S,ORF 1a:A1708D,ORF1a:I2230T,ORF1a:A220V,ORF1b:P314L,ORF1b:L1383R,ORF1 b:A1662V,ORF1b:D2499N,ORF1b:K2553F,ORF3a:W131C,ORF8:Q27*,ORF8:R 52I,ORF8:Y73C,S:N501Y,S:A570D,S:D614G,S:P681H,S:T716I,S:S982A,S:D1118 H | 6  | 0    |
| hCoV-19/Mexico/MEX-INMEGEN-05-03-103/2021 | EPI_ISL_2319255 | Q.3     | GRY | 41 | 28048T,A28111G,G28280C,A28281T,T28282A,G28881A,G28882A,G28883C,C28977T                                                                                                                                                                                                                                                                                                                                                                                                                                  | M:A69S,N:D3L:N:R203K,N:G204R,N:S235F,ORF1a:T1001,ORF1a:A17 08D,ORF1a:I2230T,ORF1b:P314L,ORF3a:G49D,ORF8:Q27*,ORF8:R52I,ORF8:Y 73C,S:N501Y,S:A570D,S:D614G,S:P681H,S:T716I,S:S982A,S:D1118H,S:G1219 C                                                                       | 22 | 144  |
| hCoV-19/Mexico/MEX-INMEGEN-05-03-118/2021 | EPI_ISL_2319264 | B.1.1.7 | GRY | 35 | 8882A,G28883C,C28977T,G29506T                                                                                                                                                                                                                                                                                                                                                                                                                                                                           | N:D3L:N:R185P,N:R203K,N:G204R,N:S235F,ORF1a:T1001,ORF1a:D1639A,OR F1a:A1708D,ORF1a:I2230T,ORF1a:T4175I,ORF1b:P218L,ORF1b:P314L,ORF1b: Y1321H,ORF1b:P1975S,ORF8:Q27*,ORF8:R52I,ORF8:K68*,ORF8:Y73C,S:V3271                                                                  | 6  | 0    |
| hCoV-19/Mexico/MEX-INMEGEN-05-03-127/2021 | EPI_ISL_2319273 | B.1.1.7 | GRY | 42 | 48T,A28095T,A28111G,G28280C,A28281T,T28282A,G28827C,G28881A,G28882A,G28883C,C2 8977T,C241T,C913T,C2110T,C3037T,C3267T,C5388A,C5986T,T6954C,G7042T,A10195G,C14120T,C14 08T,C14676T,C15279T,T16176C,C23271A,A23403G,C23604A,A23690G,C23709T,T24506G,G2 914C,C27972T,G28048T,G28075T,A28095T,A28111G,G28280C,A28281T,T28282A,G28881A,G2                                                                                                                                                                    | N:D3L:N:R203K,N:G204R,N:S235F,ORF1a:T1001,ORF1a:A1708D,ORF1a:I2230 T,ORF1a:M2259,ORF1b:P218L,ORF1b:P314L,ORF8:Q27*,ORF8:R52I,ORF8:CG 1F,ORF8:K68*,ORF8:Y73C,S:A570D,S:D614G,S:P681H,S:N710D,S:T716I,S:S982 A,S:D1118H                                                      | 22 | 574  |
| hCoV-19/Mexico/MEX-INMEGEN-05-03-15/2021  | EPI_ISL_2319183 | B.1.1.7 | GR  | 35 | 913T,C3037T,C3267T,C5388A,C5986T,G6647A,T6954C,C14408T,C14676T,C15279T,T16176C,C 17676T,C18183T,A21519C,C23271A,A23403G,C23604A,C23709T,A24070T,T24506G,G24914C,                                                                                                                                                                                                                                                                                                                                        | M:M109I,N:D3L,ORF1a:T1001,ORF1a:A1708D,ORF1a:A2128T,ORF1a:I2230T, ORF1b:P314L,ORF1b:R2684S,ORF3a:H78R,ORF8:Q27*,ORF8:R52I,ORF8:K68*,                                                                                                                                       | 20 | 2754 |
| hCoV-19/Mexico/MEX-INMEGEN-05-03-153/2021 | EPI_ISL_2341033 | B.1.1.7 | G   | 31 | C25624T,G26849T,C27972T,G28048T,A28095T,A28111G,G28280C,A28281T,T28282A,C28977T                                                                                                                                                                                                                                                                                                                                                                                                                         | N:D3L:N:R203K,N:G204R,N:S235F,ORF1a:P971I,ORF1a:T1001I,ORF1a:L1110I, ORF1a:A1708D,ORF1a:S2224F,ORF1a:I2230T,ORF1b:P314L,ORF8:Q27*,ORF8:R 52I,ORF8:Y73C,S:A570D,S:D614G,S:P681H,S:T716I,S:Q836H,S:S982A,S:D1118H                                                            | 7  | 1485 |
| hCoV-19/Mexico/MEX-INMEGEN-05-03-167/2021 | EPI_ISL_2319298 | B.1.1.7 | GRY | 34 | T,C24374T,T24506G,G24914C,G27463T,A28254C,G28280C,A28281T,T28282A,G28881A,G2888 82A,C241T,C913T,C2110T,C3037T,C3267T,C5388A,C5986T,T6954C,C9611T,C10252T,C140 8T,C14676T,C15279T,T16176C,G18651T,C21855T,G21974C,C23271A,A23403G,C23604A,C237 09T,T24506G,G24914C,C27972T,G28048T,A28111G,G28280C,A28281T,T28282A,A28295G,G28                                                                                                                                                                           | N:D3L:N:N8D,N:R203K,N:G204R,N:S235F,ORF1a:V627I,ORF1a:L730F,ORF1a: I2230T,ORF1a:A1708D,ORF1a:I2230T,ORF1a:L3116F,ORF1b:P314L,ORF1b:E1 70D,ORF8:Q27*,ORF8:R52I,ORF8:Y73C,S:S98F,S:D138H,S:A570D,S:D614G,S,P 681H,S:T716I,S:S982A,S:D1118H                                   | 24 | 979  |

|                                           |                  |         |     |    |                                                                                                                                                                                                                                                                                                                                                                                                                                                                                                                                                   |                                                                                                                                                                                                                                                                          |      |
|-------------------------------------------|------------------|---------|-----|----|---------------------------------------------------------------------------------------------------------------------------------------------------------------------------------------------------------------------------------------------------------------------------------------------------------------------------------------------------------------------------------------------------------------------------------------------------------------------------------------------------------------------------------------------------|--------------------------------------------------------------------------------------------------------------------------------------------------------------------------------------------------------------------------------------------------------------------------|------|
| hCoV-19/Mexico/MEX-INMEGEN-05-03-292/2021 | EPI_ISL_2319385  | B.1.1.7 | GR  | 35 | C913T,C2110T,C3037T,C3267T,C5388A,C5986T,T6954C,G7042T,A10195G,C10279T,C14120T,C14408T,C14676T,C15279T,T16176C,C16887T,G17427T,C23271A,A23403G,C23604A,C23709T,T24506G,G24914C,C27972T,G28048T,G28075T,A28095T,A28111G,G28280C,A28281T,T28282A,G28881A,G28882A,G28883C,C28977T                                                                                                                                                                                                                                                                    | N:D3L,N:R203K,N:G204R,N:S235F,ORF1a:T1001,ORF1a:A1708D,ORF1a:I2230T,ORF1a:M2259,ORF1b:P218L,ORF1b:P314L,ORF8_Q27*,ORF8_R52I,ORF8_K68I,ORF8_K68*,ORF8_Y73C,S:A570D,S:D614G,S:P681H,S:T716I,S:S982A,S:D1118H                                                               | 1588 |
| hCoV-19/Mexico/MEX-INMEGEN-05-03-300/2021 | EPI_ISL_2881779  | B.1.1.7 | G   | 27 | C913T,G2144A,C2453T,C3037T,C3267T,C5388A,C5986T,C9611T,C10252T,C14408T,C14676T,C15279T,T16176C,G18651T,C12855T,G21974C,C23271A,A23403G,C23604A,C23709T,T24506G,G24914C,C27972T,G28048T,A28111G,A28295G,C28977T                                                                                                                                                                                                                                                                                                                                    | N:N8D,N:S235F,ORF1a:V627I,ORF1a:V730F,ORF1a:T1001,ORF1a:A1708D,ORF1a:I2230T,ORF1b:P314L,ORF1b:E1728D,ORF8_Q27*,ORF8_R52I,ORF8_Y73C,S:598F,S:D138H,S:A570D,S:D614G,S:P681H,S:T716I,S:S982A,S:D1118H                                                                       | 4959 |
| hCoV-19/Mexico/MEX-INMEGEN-05-03-328/2021 | EPI_ISL_2319396  | B.1.1.7 | GR  | 31 | C913T,C3037T,C3267T,C5388A,C5986T,C6196T,T6954C,A8848G,C14408T,C14676T,C15279T,T16176C,T19624C,C23271A,A23403G,C23604A,C23709T,T24506G,G24914C,G25217T,C27972T,G28048T,A28111G,G28280C,A28281T,T28282A,G28881A,G28882A,G28883C,C28977T,G29715T,C241T,C913T,G960A,C2040T,C3037T,C3267T,C5388A,C5986T,G8102A,C14408T,C14676T,T1509G,C15279T,T16176C,C19164T,C20104T,G21893A,A23063T,C23271A,A23403G,C23604A,C23709T,T24506G,G24914C,C25096T,G25437C,G27375A,C27972T,G28048T,A28095T,A28111G,G28280C,A28281T,T28282A,G28881A,G28882A,G28883C,C28977T | N:D3L,N:R203K,N:G204R,N:S235F,ORF1a:R232H,ORF1a:T592I,ORF1a:T1001I,ORF1a:A1708D,ORF1a:V2613I,ORF1b:P314L,ORF1b:L2213F,ORF3a:L155F,ORF6_M58I,ORF8_Q27*,ORF8_R52I,ORF8_K68*,ORF8_Y73C,S:D111H,S:N501Y,S:A570D,S:D614G,S:P681H,S:T716I,S:S982A,S:D1118H,S:G1219C            | 1247 |
| hCoV-19/Mexico/MEX-INMEGEN-05-03-332/2021 | EPI_ISL_2319400  | B.1.1.7 | GRY | 38 | C913T,C3037T,C3177T,C3267T,C3593A,C5388A,C5986T,C6936T,T6954C,C7420T,C14408T,C14676T,C15279T,A15668T,T16176C,C20844T,C23271A,A23403G,C23604A,C23709T,C24374T,T24506G,G24914C,G27463T,G28881A,G28882A,G28883C,C28977T                                                                                                                                                                                                                                                                                                                              | N:R203K,N:G204R,N:S235F,ORF1a:P971I,ORF1a:T1001I,ORF1a:I1110I,ORF1a:A1708D,ORF1a:S224F,ORF1a:I2230T,ORF1b:P314L,ORF1b:N734I,ORF7a:V24I,S:A570D,S:D614G,S:P681H,S:T716I,S:A4368F,S:S982A,S:D1118H                                                                         | 909  |
| hCoV-19/Mexico/MEX-INMEGEN-05-03-340/2021 | EPI_ISL_2319402  | B.1.1.7 | GR  | 28 | C913T,A1643T,T16176C,C3037T,C3267T,T5260A,C5388A,C5986T,C6128T,G10907A,C14408T,C14676T,C15279T,T16176C,C23271A,A23403G,C23604A,C23709T,T24506G,G24914C,C27972T,G28048T,A28095T,A28111G,G28280C,A28281T,T28282A,G28881A,G28882A,G28883C,C28977T                                                                                                                                                                                                                                                                                                    | N:D3L,N:R203K,N:G204R,N:S235F,ORF1a:N960F,ORF1a:T1001I,ORF1a:A1708D,ORF1a:I2230T,ORF1a:V2613I,ORF1b:P314L,ORF1b:L2213F,ORF3a:L155F,ORF6_M58I,ORF8_Q27*,ORF8_R52I,ORF8_K68*,ORF8_Y73C,S:D111H,S:N501Y,S:A570D,S:D614G,S:P681H,S:T716I,S:S982A,S:D1118H                    | 2204 |
| hCoV-19/Mexico/MEX-INMEGEN-05-03-347/2021 | EPI_ISL_2341034  | B.1.1.7 | GR  | 32 | C913T,C3037T,C3267T,C5388A,C5986T,T6954C,C9611T,C14408T,C14676T,C15279T,T16176C,C12855T,G21974C,C23271A,A23403G,C23604A,C23709T,T24506G,G24914C,C27972T,G28048T,A28111G,G28280C,A28281T,T28282A,G28881A,G28882A,G28883C,C28977T                                                                                                                                                                                                                                                                                                                   | D:ORF1a:I2230T,ORF1a:I3116F,ORF1b:P314L,ORF8_Q27*,ORF8_R52I,ORF8_Y73C,S:598F,S:D138H,S:A570D,S:D614G,S:P681H,S:T716I,S:S982A,S:D1118H                                                                                                                                    | 2165 |
| hCoV-19/Mexico/MEX-INMEGEN-05-03-360/2021 | EPI_ISL_2319411  | B.1.1.7 | GR  | 30 | C913T,C3037T,C3267T,C5388A,C5944T,C5986T,T6954C,C9967T,C10868T,C13585T,C14408T,C14676T,T15096C,C15279T,T16176C,A17344G,G18412T,A23063T,C23271A,A23403G,C23604A,C23709T,T24506G,G24914C,C27972T,G28048T,A28095T,A28111G,G28280C,A28281T,T28282A,G28881A,G28882A,G28883C,C28977T                                                                                                                                                                                                                                                                    | N:D3L,N:R203K,N:G204P,N:S235F,ORF1a:T1001I,ORF1a:A1708D,ORF1a:I2230T,ORF1b:P314L,ORF1b:I293V,ORF1b:V1649F,ORF8_Q27*,ORF8_R52I,ORF8_K68I,ORF8_Y73C,S:N501Y,S:A570D,S:D614G,S:P681H,S:T716I,S:S982A,S:D1118H                                                               | 1251 |
| hCoV-19/Mexico/MEX-INMEGEN-05-03-368/2021 | EPI_ISL_2319412  | B.1.1.7 | GRY | 36 | C241T,C913T,C2110T,C2918T,C3037T,C3267T,C5388A,C5986T,T6954C,G7042T,T9519C,A10195G,C10279T,C11514T,C14120T,C14408T,C14676T,C15279T,T16176C,C16887T,G17427T,C20313T,C23271A,A23403G,C23604A,C23709T,T24506G,G24914C,C27972T,G28048T,G28075T,A28095T,A28111G,G28280C,A28281T,T28282A,G28881A,G28882A,G28883C,C28977T                                                                                                                                                                                                                                | N:D3L,N:R203K,N:G204R,N:S235F,ORF1a:P885F,ORF1a:T1001I,ORF1a:A1708D,ORF1a:I2230T,ORF1a:M2259,ORF1a:F3085,ORF1a:I3750I,ORF1a:T32013I,ORF1b:P314L,ORF1b:Q27*,ORF8_R52I,ORF8_K68I,ORF8_Y73C,S:A570D,S:D614G,S:P681H,S:T716I,S:S982A,S:D1118H                                | 237  |
| hCoV-19/Mexico/MEX-INMEGEN-05-03-4/2021   | EPI_ISL_2319174  | B.1.1.7 | GR  | 40 | 5T,A28111G,G28280C,A28281T,T28282A,G28881A,G28882A,G28883C,C28977T                                                                                                                                                                                                                                                                                                                                                                                                                                                                                | N:D3L,N:R203K,N:G204R,N:S235F,ORF1a:T1001I,ORF1a:A1708D,ORF1a:I2230T,ORF1a:M2259,ORF1a:T4355I,ORF1b:P218L,ORF1b:P314L,ORF3a:574A,ORF8_Q27*,ORF8_R52I,ORF8_K68I,ORF8_Y73C,S:A570D,S:D614G,S:P681H,S:T716I,S:S982A,S:D1118H                                                | 490  |
| hCoV-19/Mexico/MEX-INMEGEN-05-03-43/2021  | EPI_ISL_2319202  | B.1.1.7 | GR  | 36 | C241T,C913T,G1957A,A2276G,G2527A,C3037T,A3094T,C3267T,G4136T,C5388A,C5986T,T6954C,C11704T,C14408T,C14676T,C15279T,T16176C,G19542T,A21866G,G22841A,A23063T,C23271A,A23403G,C23604A,C23709T,T24506G,G24914C,G25954T,C27972T,G28048T,A28111G,G28280C,A28281T,T28282A,G28881A,G28882A,G28883C,C28977T                                                                                                                                                                                                                                                 | N:D3L,N:R203K,N:G204R,N:S235F,ORF1a:V671V,ORF1a:T1001I,ORF1a:V1291F,ORF1a:A1708D,ORF1a:I2230T,ORF1b:P314L,ORF1b:M2025I,ORF3a:G188C,ORF8_Q27*,ORF8_R52I,ORF8_Y73C,S:R102G,S:D427N,S:N501Y,S:A570D,S:D614G,G28280C,A28281T,T28282A,G28881A,G28882A,G28883C,C28977T         | 196  |
| hCoV-19/Mexico/MEX-INMEGEN-05-03-46/2021  | EPI_ISL_2319205  | B.1.1.7 | GRY | 39 | C241T,C913T,C3037T,C3267T,C5388A,C5986T,C6196T,T6954C,A8848G,C14408T,C14676T,C15279T,T16176C,T19624C,A23063T,C23271A,A23403G,C23604A,C23709T,T24506G,G24914C,G25217T,C27972T,G28048T,A28111G,G28280C,A28281T,T28282A,G28881A,G28882A,G28883C,C28977T                                                                                                                                                                                                                                                                                              | N:D3L,N:R203K,N:G204R,N:S235F,ORF1a:T1001I,ORF1a:A1708D,ORF1a:I2230T,ORF1b:P314L,ORF8_Q27*,ORF8_R52I,ORF8_Y73C,S:N501Y,S:A570D,S:D614G,S:P681H,S:T716I,S:S982A,S:D1118H                                                                                                  | 0    |
| hCoV-19/Mexico/MEX-INMEGEN-05-03-5/2021   | EPI_ISL_2319175  | B.1.1.7 | GRY | 32 | C241T,C913T,C3037T,C3267T,C5388A,C5986T,C6196T,T6954C,A8848G,C14408T,C14676T,C15279T,T16176C,A23063T,C23271A,T23332C,A23403G,C23604A,C23709T,T24506G,G24914C,G25217T,G25938A,G26727T,C27972T,G28048T,A28111G,G28280C,A28281T,T28282A,G28881A,G28882A,G28883C,C28977T,G29506T,G29715T                                                                                                                                                                                                                                                              | N:D3L,N:R203K,N:G204R,N:S235F,ORF1a:T1001I,ORF1a:A1708D,ORF1a:I2230T,ORF1b:P314L,ORF3a:G49D,ORF8_Q27*,ORF8_R52I,ORF8_Y73C,S:N501Y,S:A570D,S:D614G,S:P681H,S:T716I,S:S982A,S:D1118H,S:G1219C                                                                              | 249  |
| hCoV-19/Mexico/MEX-INMEGEN-05-03-69/2021  | EPI_ISL_2319226  | B.1.1.7 | GRY | 36 | 882A,G28883C,C28977T,G29506T,G29715T                                                                                                                                                                                                                                                                                                                                                                                                                                                                                                              | N:D3L,N:R203K,N:G204R,N:S235F,ORF1a:T1001I,ORF1a:P14975,ORF1a:A1708D,ORF1a:I2230T,ORF1a:M2259,ORF1b:P218L,ORF1b:P314L,ORF1b:A1432V,ORF1b:A1662V,ORF8_Q27*,ORF8_R52I,ORF8_K68*,ORF8_Y73C,S:N501Y,S:A570D,S:D614G,S:P681H,S:T716I,S:S982A,S:D1118H                         | 11   |
| hCoV-19/Mexico/MEX-INMEGEN-05-03-72/2021  | EPI_ISL_2319229  | B.1.1.7 | GRY | 38 | C241T,C913T,C2788T,C3037T,C3267T,C5388A,C5986T,C6196T,T6954C,A8848G,C14408T,C14676T,C15279T,T16176C,C17762T,C18452T,C19263T,A23063T,C23271A,A23403G,C23604A,C23709T,T24506G,G24914C,T25180C,C27972T,G28048T,A28095T,A28111G,G28280C,A28281T,T28282A,G28881A,G28882A,G28883C,C28977T                                                                                                                                                                                                                                                               | M:A695,N:D3L,N:R203K,N:G204R,N:S235F,ORF1a:T1001I,ORF1a:A1708D,ORF1a:I2230T,ORF1b:P314L,ORF8_Q27*,ORF8_R52I,ORF8_Y73C,S:N501Y,S:A570D,S:D614G,S:P681H,S:T716I,S:S982A,S:D1118H,S:G1219C                                                                                  | 0    |
| hCoV-19/Mexico/MEX-INMEGEN-05-03-73/2021  | EPI_ISL_2319230  | B.1.1.7 | GRY | 34 | 17T,G26727T,C27972T,G28048T,A28111G,G28280C,A28281T,T28282A,G28881A,G28882A,G28883C,C241T,C913T,G1957A,A2276G,G2527A,C3037T,A3094T,C3267T,G4136T,C5388A,C5986T,T6954C,C14408T,C14676T,C15279T,T16176C,G19542T,G22841A,A23063T,C23271A,A23403G,C23604A,C23709T,T24506G,G24914C,G25954T,C27972T,G28048T,A28111G,G28280C,A28281T,T28282A,G28881A,G28882A,G28883C,C28977T                                                                                                                                                                             | N:D3L,N:R203K,N:G204R,N:S235F,ORF1a:V671V,ORF1a:T1001I,ORF1a:V1291F,ORF1a:A1708D,ORF1a:I2230T,ORF1b:P314L,ORF1b:M2025I,ORF3a:G188C,ORF8_Q27*,ORF8_R52I,ORF8_Y73C,S:D427N,S:N501Y,S:A570D,S:D614G,S:P681H,S:T716I,S:S982A,S:D1118H                                        | 249  |
| hCoV-19/Mexico/MEX-INMEGEN-05-03-91/2021  | EPI_ISL_2319245  | B.1.1.7 | GRY | 37 | 82A,C28744T,G28881A,G28882A,G28883C,C28977T                                                                                                                                                                                                                                                                                                                                                                                                                                                                                                       | M:V70L,N:D3L,N:R203K,N:G204R,N:S235F,ORF1a:T1001I,ORF1a:P16405,ORF1a:A1708D,ORF1a:I2230T,ORF1a:A3220V,ORF1b:P314L,ORF1b:K1383R,ORF1b:A1662V,ORF1b:D2499N,ORF1b:K2557R,ORF3a:W131C,ORF8_Q27*,ORF8_R52I,ORF8_Y73C,S:N501Y,S:A570D,S:D614G,S:P681H,S:T716I,S:S982A,S:D1118H | 219  |
| hCoV-19/Mexico/MEX-INMEGEN-05-04-100/2021 | EPI_ISL_23439957 | Q.3     | GRY | 21 | 28048T,A28111G,G28280C,A28281T,T28282A,G28881A,G28882A,G28883C,C28977T                                                                                                                                                                                                                                                                                                                                                                                                                                                                            | N:D3L,N:R203K,N:G204R,N:S235F,ORF1a:G519S,ORF1a:T1001I,ORF1a:A1708D,ORF1a:I2230T,ORF1a:V1877I,ORF1a:I2230T,ORF1a:M3074I,ORF1a:Q3966F,ORF1b:P314L,ORF1b:K1383R,ORF1b:K2557R,ORF8_Q27*,ORF8_R52I,ORF8_Y73C,S:A570D,S:D614G,S:P681H,S:T716I,S:S982A,S:D1118H                | 1878 |
| hCoV-19/Mexico/MEX-INMEGEN-05-04-103/2021 | EPI_ISL_2349960  | B.1.1.7 | GR  | 32 | C28977T                                                                                                                                                                                                                                                                                                                                                                                                                                                                                                                                           | N:D3L,N:R203K,N:G204R,N:S235F,ORF1a:T1001I,ORF1a:A1708D,ORF1a:I2230T,ORF1a:M2259I,ORF1b:P218L,ORF1b:P314L,ORF1b:A1432V,ORF3a:585B,ORF7a:598F,ORF8_Q27*,ORF8_R52I,ORF8_K68*,ORF8_Y73C,S:A570D,S:D614G,S:P681H,S:T716I,S:S982A,S:D1118H                                    | 916  |
| hCoV-19/Mexico/MEX-INMEGEN-05-04-105/2021 | EPI_ISL_2349961  | B.1.1.7 | GR  | 35 | 28881A,G28882A,G28883C,C28977T                                                                                                                                                                                                                                                                                                                                                                                                                                                                                                                    | N:D3L,N:R203K,N:G204R,N:S235F,ORF1a:T1001I,ORF1a:A1708D,ORF1a:I2230T,ORF1a:F3624L,ORF1b:P314L,ORF8_Q27*,ORF8_R52I,ORF8_Y73C,S:N501Y,S:A570D,S:D614G,S:P681H,S:T716I,S:A8455,S:S982A,S:D1118H                                                                             | 219  |
| hCoV-19/Mexico/MEX-INMEGEN-05-04-110/2021 | EPI_ISL_2349965  | B.1.1.7 | GRY | 35 | 882A,G28883C,C28977T,G29715T                                                                                                                                                                                                                                                                                                                                                                                                                                                                                                                      | N:D3L,N:R203K,N:G204R,N:S235F,ORF1a:G519S,ORF1a:T1001I,ORF1a:A1708D,ORF1a:I2230T,ORF1a:V1877I,ORF1a:I2230T,ORF1a:M3074I,ORF1a:Q3966F,ORF1b:P314L,ORF1b:K1383R,ORF1b:K2557R,ORF8_Q27*,ORF8_R52I,ORF8_Y73C,S:A570D,S:D614G,S:P681H,S:T716I,S:S982A,S:D1118H,S:K1191N       | 1484 |
| hCoV-19/Mexico/MEX-INMEGEN-05-04-112/2021 | EPI_ISL_2349966  | B.1.1.7 | GR  | 35 | G28881A,G28882A,G28883C,C28977T                                                                                                                                                                                                                                                                                                                                                                                                                                                                                                                   |                                                                                                                                                                                                                                                                          |      |







|                                           |                 |         |    |    |                                                                                                                                                                                                                                                                                                                                                                                                                                                                                                                                                                                                                                                                                                                                                                                                                                                                                                                                                                                                                                                                                                                                                                                                                                                                                                                                                                                                                                                                                                                                                                                                                                                                                                                                                                                                                                                                                                                                                                                                                                                                                                                                                                                                                                                                                                                                                                                                                                                                                                                                                                                                                                                                                                                                                                                                                                                                                                                                                                                                                                                                                                                                                                                                                                                                                                                                                                                                                                                                                                                                                                                                                                                                                                                                                                                                                                                                                                                                                                                                                                                                                                                                                                                                                                                                                                                                                                                                                                                                                                                                                                                                                                                                                                                                                                                                                                                                                                                                                                                                                                                                                                                                                                                                                                                                                                                                                                                                                                                                                                                                                                                                                                                                                                                                                                                                                                                                                                                                                                                                         |                                                                                                                                                                                                                                                                                                                                                                                                                                                                                                                                                                                                                                                                                                                                                                                                                                                                                                                                                                                                                                                                                                                                                                                                                                                                                                                                                                                                                                                                                                                                                                                                                                                                                                                                                                                                                                                                                                                                                                                                                                                                                                                                                                                                                                                                                                                                                                                                                                                                                                                                                                                                                                                                                                                                                                                                                                                                                                                                                                                                                                                                                                                                                                                                                                                                                                                                                                                                                                                                                                                                                                                                                                                                                                                                                                                                                                                                                                                                                                                                                                                                                                                                                                                                                                                                                                                                                                                                                                                                                                                                                                                                                                                                                                                                                                                                                                                                                                                                                                                     |
|-------------------------------------------|-----------------|---------|----|----|---------------------------------------------------------------------------------------------------------------------------------------------------------------------------------------------------------------------------------------------------------------------------------------------------------------------------------------------------------------------------------------------------------------------------------------------------------------------------------------------------------------------------------------------------------------------------------------------------------------------------------------------------------------------------------------------------------------------------------------------------------------------------------------------------------------------------------------------------------------------------------------------------------------------------------------------------------------------------------------------------------------------------------------------------------------------------------------------------------------------------------------------------------------------------------------------------------------------------------------------------------------------------------------------------------------------------------------------------------------------------------------------------------------------------------------------------------------------------------------------------------------------------------------------------------------------------------------------------------------------------------------------------------------------------------------------------------------------------------------------------------------------------------------------------------------------------------------------------------------------------------------------------------------------------------------------------------------------------------------------------------------------------------------------------------------------------------------------------------------------------------------------------------------------------------------------------------------------------------------------------------------------------------------------------------------------------------------------------------------------------------------------------------------------------------------------------------------------------------------------------------------------------------------------------------------------------------------------------------------------------------------------------------------------------------------------------------------------------------------------------------------------------------------------------------------------------------------------------------------------------------------------------------------------------------------------------------------------------------------------------------------------------------------------------------------------------------------------------------------------------------------------------------------------------------------------------------------------------------------------------------------------------------------------------------------------------------------------------------------------------------------------------------------------------------------------------------------------------------------------------------------------------------------------------------------------------------------------------------------------------------------------------------------------------------------------------------------------------------------------------------------------------------------------------------------------------------------------------------------------------------------------------------------------------------------------------------------------------------------------------------------------------------------------------------------------------------------------------------------------------------------------------------------------------------------------------------------------------------------------------------------------------------------------------------------------------------------------------------------------------------------------------------------------------------------------------------------------------------------------------------------------------------------------------------------------------------------------------------------------------------------------------------------------------------------------------------------------------------------------------------------------------------------------------------------------------------------------------------------------------------------------------------------------------------------------------------------------------------------------------------------------------------------------------------------------------------------------------------------------------------------------------------------------------------------------------------------------------------------------------------------------------------------------------------------------------------------------------------------------------------------------------------------------------------------------------------------------------------------------------------------------------------------------------------------------------------------------------------------------------------------------------------------------------------------------------------------------------------------------------------------------------------------------------------------------------------------------------------------------------------------------------------------------------------------------------------------------------------------------------------|-------------------------------------------------------------------------------------------------------------------------------------------------------------------------------------------------------------------------------------------------------------------------------------------------------------------------------------------------------------------------------------------------------------------------------------------------------------------------------------------------------------------------------------------------------------------------------------------------------------------------------------------------------------------------------------------------------------------------------------------------------------------------------------------------------------------------------------------------------------------------------------------------------------------------------------------------------------------------------------------------------------------------------------------------------------------------------------------------------------------------------------------------------------------------------------------------------------------------------------------------------------------------------------------------------------------------------------------------------------------------------------------------------------------------------------------------------------------------------------------------------------------------------------------------------------------------------------------------------------------------------------------------------------------------------------------------------------------------------------------------------------------------------------------------------------------------------------------------------------------------------------------------------------------------------------------------------------------------------------------------------------------------------------------------------------------------------------------------------------------------------------------------------------------------------------------------------------------------------------------------------------------------------------------------------------------------------------------------------------------------------------------------------------------------------------------------------------------------------------------------------------------------------------------------------------------------------------------------------------------------------------------------------------------------------------------------------------------------------------------------------------------------------------------------------------------------------------------------------------------------------------------------------------------------------------------------------------------------------------------------------------------------------------------------------------------------------------------------------------------------------------------------------------------------------------------------------------------------------------------------------------------------------------------------------------------------------------------------------------------------------------------------------------------------------------------------------------------------------------------------------------------------------------------------------------------------------------------------------------------------------------------------------------------------------------------------------------------------------------------------------------------------------------------------------------------------------------------------------------------------------------------------------------------------------------------------------------------------------------------------------------------------------------------------------------------------------------------------------------------------------------------------------------------------------------------------------------------------------------------------------------------------------------------------------------------------------------------------------------------------------------------------------------------------------------------------------------------------------------------------------------------------------------------------------------------------------------------------------------------------------------------------------------------------------------------------------------------------------------------------------------------------------------------------------------------------------------------------------------------------------------------------------------------------------------------------------------------------------------|
| hCoV-19/Mexico/MEX-INMEGEN-05-05-156/2021 | EPI_ISL_2444494 | B.1.1.7 | GR | 41 | C241T,C913T,T1177C,T1537G,C2110T,G2528A,C3037T,C3267T,C4296T,C5142T,C5388A,C5986T, T6954C,G7042T,C10789T,C14120T,C14408T,C14676T,C15279T,T16176C,C20470A,C23271A,C2 3403G,C23604A,C23709T,T24506G,G24914C,C25452T,G25471T,C27972T,G28048T,A28095T,A 28111G,G28280C,A28281T,T28282A,G28881A,G28882A,G28883C,C28977T,C29167T C913T,C2110T,C3037T,C3267T,C3393T,C5388A,C5986T,T6954C,G7042T,C7834T,A10195G,C141 20T,C14408T,C14676T,C15279T,T16176C,C16833T,C19152A,C23271A,A23403G,C23604A,C23 09T,T24506G,G24914C,C27972T,G28048T,G28075T,A28095T,A28111G,G28280C,A28281T,T2 8281T,C913T,C3037T,C3267T,C5388A,C5986T,C6196T,T6954C,A8848G,C14408T,C14676T,C15 279T,T16176C,C23271A,A23403G,C23604A,C23709T,T24506G,G24914C,G25217T,G26272T,C2 972T,G28048T,A28111G,G28280C,A28281T,T28282A,G28881A,G28882A,G28883C,C28977T,G C241T,C913T,C2110T,C3037T,C3267T,C3393T,G3728T,C5388A,C5986T,T6954C,G7042T,C7834T, A10195G,C14120T,C14408T,C14676T,C15279T,T16176C,C16833T,C19152A,C23247T,A23063T, C23271A,A23403G,C23604A,C23709T,T24506G,G24914C,C27972T,G28048T,G28075T,A28095 T,A28111G,G28280C,A28281T,T28282A,G28881A,G28882A,G28883C,C28977T C241T,C913T,C3037T,C3267T,A3492G,C4331T,C5388A,C5986T,T6954C,C14408T,C14676T,C152 79T,T16176C,C18555T,C21639A,A23063T,C23271A,A23403G,C23604A,C23709T,C24374T,T245 06G,G24914C,C27972T,G28048T,A28111G,G28280C,A28281T,T28282A,G28881A,G28882A,G2 241T,C913T,C3037T,C3267T,C5388A,C5986T,T6954C,A13768T,C14408T,C14676T,T15096C,C1 5279T,T16176C,C23271A,A23403G,C23520T,C23604A,C23709T,T24506G,G24914C,C26606T,C 27972T,G28048T,A28095T,A28111G,G28280C,A28281T,T28282A,G28300T,C28977T C22T,C241T,C913T,C2110T,C3037T,C3267T,C5388A,C5986T,T6954C,G7042T,C8389T,C12115T, C13517T,C14120T,C14408T,C14676T,C15279T,T16176C,C16900T,C17762T,A23063T,C23271A, A23403G,C23604A,C23709T,T24506G,G24914C,T25180C,G26416T,C27972T,G28048T,A28095T A28111G,G28280C,A28281T,T28282A,G28881A,G28882A,G28883C,C28977T C203T,C241T,C913T,G1820A,C3037T,C3267T,G5023T,C5388A,G5924A,C5986T,T6954C,G9526T, A12162G,C14408T,C14676T,C15279T,C15720T,T16176C,A17615G,T19363C,A21137G,A23063T, C23248T,C23271A,A23403G,C23604A,C23709T,T24506G,G24914C,G25135T,C27972T,G28048 T,A28111G,G28280C,A28281T,T28282A,G28881A,G28882A,G28883C,C28977T C241T,C913T,G229A,C3037T,C3267T,G5023A,C5388A,C5986T,T6954C,A9529G,G1039 6T,C14408T,C14676T,C15279T,T16176C,A17615G,C18131T,G18984T,G20962A,G22094C,A230 63T,C23271A,A23403G,C23604A,C23709T,C24378T,T24506G,G24914C,G26730C,C27972T,G28 048T,A28111G,G28280C,A28281T,T28282A,G28881A,G28882A,G28883C,C28977T C241T,C913T,C1426T,G2281A,C3037T,C3267T,C5388A,C5986T,T6954C,A12162G,C13665T,C144 08T,C14676T,C15279T,C15720T,T16176C,A17615G,C18747T,C20844T,A21137G,A23063T,C232 71A,A23403G,C23604A,C23709T,T24506G,G24914C,G25135T,C26110T,C26521T,G26282T,C2 972T,G28048T,A28111G,G28280C,A28281T,T28282A,G28881A,G28882A,G28883C,C28977T,C2 C241T,C913T,C3037T,C3267T,C4206T,C4900T,C5388A,C5986T,T6954C,C6982T,C11941T,A1216 2G,C13824T,C14230T,C14408T,C14676T,C15279T,C15720T,T16176C,A17615G,A21137G,C2327 1A,A23403G,C23604A,C23709T,G24047T,T24506G,G24914C,G25135T,G25302T,G27014T,C27 972T,G28048T,A28111G,G28280C,A28281T,T28282A,C28791T,G28881A,G28882A,G28883C,C28 201A,C241T,C913T,C2110T,C2675T,A2693T,C3037T,C3267T,C5388A,C5986T,T6954C,G7042T,A 10195G,C13329T,C14120T,C14408T,C14676T,C15279T,T16176C,C21811T,T22679C,C23271A, A23403G,C23604A,C23709T,T24506G,G24914C,C25046G,C25708T,C26270T,C27972T,G28048T, G28075T,A28095T,A28111G,G28280C,A28281T,T28282A,G28881A,G28882A,G28883C,C2897 7T,C241T,C913T,C3037T,C3267T,A3492G,C4331T,C5388A,C5986T,T6954C,C14408T,C14676T,C152 79T,T16176C,C18555T,C21639A,A23063T,C23271A,A23403G,C23604A,C23709T,C24374T,T245 06G,G24914C,C27972T,G28048T,A28111G,G28280C,A28281T,T28282A,G28881A,G28882A,G2 241T,A435G,C913T,G1957A,C2189T,A2276G,G2527A,C3037T,A3094T,C3267T,G4136T,C5388A ,C5986T,T6954C,C11704T,C11750T,C14408T,C14676T,C15279T,T16176C,G19542T,G22841A,A2 3063T,C23271A,A23403G,C23604A,C23709T,T24506G,G24914C,G25954T,C27972T,G28048T,A 28111G,G28280C,A28281T,T28282A,C28744T,G28881A,G28882A,G28883C,C28977T C241T,C913T,C3037T,C3267T,C5388A,C5986T,T6954C,G2997T,A13768T,C14408T,C14676T,T150 96C,C15279T,T16176C,T16728C,A18262G,A23063T,C23271A,A23403G,C23520T,C23604A,C23 709T,T24506G,G24914C,C26606T,C27972T,G28048T,A28095T,A28111G,G28280C,A28281T,T2 8282A,G28300T,A28977T,C28977T C241T,C913T,G1069A,C1609T,C3037T,T0349C,C3267T,C5388A,G5558A,C5986T,T6954C,C8655T A12162G,G14294A,C14408T,C14676T,C15279T,C15720T,T16176C,A17615G,C18329T,A21137 G,C22636T,A23063T,C23271A,A23403G,C23604A,C23709T,T24506G,G24914C,G25135T,C279 2T,G28048T,A28111G,G28280C,A28281T,T28282A,G28881A,G28882A,G28883C,G28916A,C28 C241T,C913T,C2937T,C3037T,C3267T,C5388A,C5986T,C6196T,T6954C,A8848G,A11898G,C1440 8T,C14676T,C15279T,T16176C,T19624C,A23063T,C23271A,A23403G,C23604A,C23709T,T2450 6G,G24914C,G25217T,C26270T,C27972T,G28048T,A28111G,G28280C,A28281T,T28282A,G28 81A,G28882A,G28883C,C28977T,G29715T C241T,C913T,G1487T,C2110T,C3037T,C3267T,C3393T,C5388A,C5986T,T6954C,G7042T,C7834T, A10195G,C14120T,C14408T,C14676T,C15279T,T16176C,C16833T,C19152A,A23063T,C23271A, A23403G,C23604A,C23709T,T24506G,G24914C,C27972T,G28048T,G28075T,A28095T,A28111 G,G28280C,A28281T,T28282A,G28881A,G28882A,G28883C,C28977T C241T,C815T,C913T,C3037T,C3267T,C5388A,C5986T,T6954C,G8513A,C9491T,A12162G,C13051 T,C14408T,C14676T,C15279T,C15720T,T16176C,A17615G,A21137G,A23063T,C23271A,A23403 G,C23604A,C23709T,T24506G,G24914C,G25135T,C27903T,C27972T,G28048T,A28111G,G2828 0C,A28281T,T28282A,G28881A,G28882A,G28883C,C28977T G174T,G210T,C241T,C913T,C2453T,C3037T,C3267T,C5388A,C5986T,T6954C,A8588G,T9016C,T 14408T,C14676T,C15279T,T16176C,G21867T,A23063T,C23271A,A23403G,C23604A,C23709T,T 24506G,G24914C,C25916T,C27883T,C27972T,G28048T,A28111G,G28280C,A28281T,T28282A, C28453T,G28881A,G28882A,G28883C,C28977T | N:D3L,N:R203K,N:G204R,N:S235F,ORF1a:E755K,ORF1a:T1001,ORF1a:T1344I, ORF1a:T1626I,ORF1a:A1708D,ORF1a:I2230T,ORF1a:M2259I,ORF1b:P218L,ORF1 b:P314L,ORF1b:Q2335K,ORF3a:D227,ORF8:Q277,ORF8:R52I,ORF8:X68I,OR F8:Y73C,S:AS70D,S:D614G,S:P681H,S:T716I,S:S982A,S:D1118H 6 509 N:D3L,N:S235F,ORF1a:T1001,ORF1a:A1043V,ORF1a:I2230T,OR F1a:M2259I,ORF1b:P218L,ORF1b:P314L,ORF8:Q277,ORF8:R52I,ORF8:C61F, 8 2555 ORF8:K68I,ORF8:Y73C,S:AS70D,S:D614G,S:P681H,S:T716I,S:S982A,S:D1118H M:A695,N:D3L,N:R203K,N:G204R,N:S235F,ORF1a:T2207,ORF8:Q277,ORF8:R52I,ORF1a:I2230T,ORF1b:P314L,ORF8:Q277,ORF8:R52I,ORF8:Y73C,S:AS70D,S:D614G, 6 379 S:P681H,S:T716I,S:S982A,S:D1118H,S:G1219C N:D3L,N:R203K,N:G204R,N:S235F,ORF1a:T1001,ORF1a:A1043V,ORF1a:G115 5C,ORF1a:A1708D,ORF1a:I2230T,ORF1a:M2259I,ORF1b:P218L,ORF1b:P314L, ORF8:Q277,ORF8:R52I,ORF8:C61F,ORF8:K68I,ORF8:Y73C,S:AS70D,S:N501Y,S: 25 A570D,S:D614G,S:P681H,S:T716I,S:S982A,S:D1118H N:D3L,N:R203K,N:G204R,N:S235F,ORF1a:T1001,ORF1a:N10765,ORF1a:A170 8D,ORF1a:I2230T,ORF1b:P314L,ORF8:Q277,ORF8:R52I,ORF8:Y73C,S:P26H,S:N 6 76 S01Y,S:AS70D,S:D614G,S:P681H,S:T716I,S:I938F,S:S982A,S:D1118H N:D3L,N:Q9H,N:S235F,ORF1a:T1001,ORF1a:Q9H,ORF1a:I2230T,ORF1b:M 101I,ORF1b:P314L,ORF8:Q277,ORF8:R52I,ORF8:K68I,ORF8:Y73C,ORF9b:S6I,S 6 1503 A570D,S:D614G,S:A653V,S:P681H,S:T716I,S:S982A,S:D1118H EVS8F,N:D3L,N:R203K,N:G204R,N:S235F,ORF1a:T1001,ORF1a:A1708D,ORF1 a:I2230T,ORF1a:M2259I,ORF1b:T17,ORF1b:P218L,ORF1b:P314L,ORF1b:G11 45C,ORF1b:A1432V,ORF8:Q277,ORF8:R52I,ORF8:K68I,ORF8:Y73C,S:N501Y S: 25 A570D,S:D614G,S:P681H,S:T716I,S:S982A,S:D1118H N:D3L,N:R203K,N:G204R,N:S235F,ORF1a:G5195,ORF1a:T1001,ORF1a:M1586 I,ORF1a:A1708D,ORF1a:I887I,ORF1a:I2230T,ORF1a:M3087I,ORF1a:Q3966F, ORF1b:P314L,ORF1b:K1383R,ORF1b:K2557R,ORF8:Q277,ORF8:R52I,ORF8:Y73C, 26 54 S:N501Y,S:AS70D,S:D614G,S:P681H,S:T716I,S:S982A,S:D1118H,S:K1191N M:V20L,N:D3L,N:R203K,N:G204R,N:S235F,ORF1a:C655Y,ORF1a:T1001,ORF1a :M1586I,ORF1a:A1708D,ORF1a:I2230T,ORF1b:P314L,ORF1b:K1383R,ORF1b:T 1555I,ORF1b:M1839I,ORF1b:D2499N,ORF8:Q277,ORF8:R52I,ORF8:Y73C,S:D1 27 169 H,S:N501Y,S:AS70D,S:D614G,S:P681H,S:T716I,S:S939F,S:S982A,S:D1118H N:D3L,N:R203K,N:G204R,N:S235F,ORF1a:T1001,ORF1a:A1708D,ORF1a:I2230 T,ORF1a:Q3966F,ORF1b:P314L,ORF1b:K1383R,ORF1b:K2557R,ORF3a:P240S, ORF8:Q277,ORF8:R52I,ORF8:Y73C,S:N501Y,S:AS70D,S:D614G,S:P681H,S:T716I, 23 I:S982A,S:D1118H,S:K1191N N:D3L,N:A173V,N:R203K,N:G204R,N:S235F,ORF1a:T1001,ORF1a:A1314V,OR F1a:A1708D,ORF1a:I2230T,ORF1a:Q3966F,ORF1b:P2555,ORF1b:P314L,ORF1 b:K1383R,ORF1b:K2557R,ORF8:Q277,ORF8:R52I,ORF8:Y73C,S:AS70D,S:D614 26 764 G,S:P681H,S:T716I,S:A8295,S:S982A,S:D1118H,S:K1191N E:T9I,N:D3L,N:R203K,N:G204R,N:S235F,ORF1a:P804S,ORF1a:N810Y,ORF1a:T1 001,ORF1a:A1708D,ORF1a:I2230T,ORF1a:Q3966F,ORF1a:T4355I,ORF1b:P21 8L,ORF1b:P314L,ORF3a:I106F,ORF8:Q277,ORF8:R52I,ORF8:C61F,ORF8:K68I, 28 895 ORF8:Y73C,S:S373P,S:A570D,S:D614G,S:P681H,S:T716I,S:S982A,S:D1118H,S P N:D3L,N:R203K,N:G204R,N:S235F,ORF1a:T1001,ORF1a:N10765,ORF1a:A170 8D,ORF1a:I2230T,ORF1b:P314L,ORF8:Q277,ORF8:R52I,ORF8:Y73C,S:P26H,S:N 21 S01Y,S:AS70D,S:D614G,S:P681H,S:T716I,S:I938F,S:S982A,S:D1118H N:D3L,N:R203K,N:G204R,N:S235F,ORF1a:E57G,ORF1a:L642F,ORF1a:I671V,OR F1a:T1001,ORF1a:V1291F,ORF1a:A1708D,ORF1a:I2230T,ORF1a:L3829F,ORF1 b:P314L,ORF1b:M2025I,ORF3a:G188C,ORF8:Q277,ORF8:R52I,ORF8:Y73C,S:D 26 514 427N,S:N501Y,S:AS70D,S:D614G,S:P681H,S:T716I,S:S982A,S:D1118H N:D3L,N:Q9H,N:S235F,ORF1a:T1001,ORF1a:A1708D,ORF1a:I2230T,ORF1a:A2 345V,ORF1b:M101I,ORF1b:P314L,ORF1b:Q3878R,ORF1b:P314L,ORF8:Q277,OR F8:Y73C,S:N501Y,S:AS70D,S:D614G,S:P681H,S:T716I,S:S982A,S:D1118H,S:G1 23 6 716I,S:S982A,S:D1118H N:D3L,N:R203K,N:G204R,N:G2155N,S235F,ORF1a:T1001,ORF1a:A1708D,OR F1a:V1765I,ORF1a:I2230T,ORF1a:S2797F,ORF1a:Q3966F,ORF1b:R276H,ORF1 b:P314L,ORF1b:K1383R,ORF1b:T1621I,ORF1b:K2557R,ORF8:Q277,ORF8:R52I 27 32 ,ORF8:Y73C,S:N501Y,S:AS70D,S:D614G,S:P681H,S:T716I,S:S982A,S:D1118H,S E:T9I,N:D3L,N:R203K,N:G204R,N:S235F,ORF1a:T891I,ORF1a:T1001,ORF1a:A1 708D,ORF1a:I2230T,ORF1a:Q3878R,ORF1b:P314L,ORF8:Q277,ORF8:R52I,ORF 8:Y73C,S:N501Y,S:AS70D,S:D614G,S:P681H,S:T716I,S:S982A,S:D1118H,S:G1 24 9C N:D3L,N:R203K,N:G204R,N:S235F,ORF1a:G408C,ORF1a:T1001,ORF1a:A1043 V,ORF1a:A1708D,ORF1a:I2230T,ORF1a:M2259I,ORF1b:P218L,ORF1b:P314L,O RF8:Q277,ORF8:R52I,ORF8:C61F,ORF8:K68I,ORF8:Y73C,S:N501Y,S:AS70D,S 24 614G,S:P681H,S:T716I,S:S982A,S:D1118H N:D3L,N:R203K,N:G204R,N:S235F,ORF1a:T1001,ORF1a:A1708 D,ORF1a:I2230T,ORF1a:V2750I,ORF1a:H3076Y,ORF1a:Q3966F,ORF1b:P314L, ORF1b:K1383R,ORF1b:K2557R,ORF8:L4F,ORF8:Q277,ORF8:R52I,ORF8:Y73C,S: 26 156 N501Y,S:AS70D,S:D614G,S:P681H,S:T716I,S:S982A,S:D1118H,S:K1191N N:D3L,N:R203K,N:G204R,N:S235F,ORF1a:P310F,ORF1a:T1001,ORF1a:A1708 D,ORF1a:I2230T,ORF1a:K277E,ORF1b:Q374L,ORF3a:A173V,ORF8:Q277,ORF8:R52I,ORF8:Y73C,ORF9b:A57V,S:R102I,S:N501Y,S:AS70D,S:D614G, 6 56 S:P681H,S:T716I,S:S982A,S:D1118H |
|-------------------------------------------|-----------------|---------|----|----|---------------------------------------------------------------------------------------------------------------------------------------------------------------------------------------------------------------------------------------------------------------------------------------------------------------------------------------------------------------------------------------------------------------------------------------------------------------------------------------------------------------------------------------------------------------------------------------------------------------------------------------------------------------------------------------------------------------------------------------------------------------------------------------------------------------------------------------------------------------------------------------------------------------------------------------------------------------------------------------------------------------------------------------------------------------------------------------------------------------------------------------------------------------------------------------------------------------------------------------------------------------------------------------------------------------------------------------------------------------------------------------------------------------------------------------------------------------------------------------------------------------------------------------------------------------------------------------------------------------------------------------------------------------------------------------------------------------------------------------------------------------------------------------------------------------------------------------------------------------------------------------------------------------------------------------------------------------------------------------------------------------------------------------------------------------------------------------------------------------------------------------------------------------------------------------------------------------------------------------------------------------------------------------------------------------------------------------------------------------------------------------------------------------------------------------------------------------------------------------------------------------------------------------------------------------------------------------------------------------------------------------------------------------------------------------------------------------------------------------------------------------------------------------------------------------------------------------------------------------------------------------------------------------------------------------------------------------------------------------------------------------------------------------------------------------------------------------------------------------------------------------------------------------------------------------------------------------------------------------------------------------------------------------------------------------------------------------------------------------------------------------------------------------------------------------------------------------------------------------------------------------------------------------------------------------------------------------------------------------------------------------------------------------------------------------------------------------------------------------------------------------------------------------------------------------------------------------------------------------------------------------------------------------------------------------------------------------------------------------------------------------------------------------------------------------------------------------------------------------------------------------------------------------------------------------------------------------------------------------------------------------------------------------------------------------------------------------------------------------------------------------------------------------------------------------------------------------------------------------------------------------------------------------------------------------------------------------------------------------------------------------------------------------------------------------------------------------------------------------------------------------------------------------------------------------------------------------------------------------------------------------------------------------------------------------------------------------------------------------------------------------------------------------------------------------------------------------------------------------------------------------------------------------------------------------------------------------------------------------------------------------------------------------------------------------------------------------------------------------------------------------------------------------------------------------------------------------------------------------------------------------------------------------------------------------------------------------------------------------------------------------------------------------------------------------------------------------------------------------------------------------------------------------------------------------------------------------------------------------------------------------------------------------------------------------------------------------------------------------------------------|-------------------------------------------------------------------------------------------------------------------------------------------------------------------------------------------------------------------------------------------------------------------------------------------------------------------------------------------------------------------------------------------------------------------------------------------------------------------------------------------------------------------------------------------------------------------------------------------------------------------------------------------------------------------------------------------------------------------------------------------------------------------------------------------------------------------------------------------------------------------------------------------------------------------------------------------------------------------------------------------------------------------------------------------------------------------------------------------------------------------------------------------------------------------------------------------------------------------------------------------------------------------------------------------------------------------------------------------------------------------------------------------------------------------------------------------------------------------------------------------------------------------------------------------------------------------------------------------------------------------------------------------------------------------------------------------------------------------------------------------------------------------------------------------------------------------------------------------------------------------------------------------------------------------------------------------------------------------------------------------------------------------------------------------------------------------------------------------------------------------------------------------------------------------------------------------------------------------------------------------------------------------------------------------------------------------------------------------------------------------------------------------------------------------------------------------------------------------------------------------------------------------------------------------------------------------------------------------------------------------------------------------------------------------------------------------------------------------------------------------------------------------------------------------------------------------------------------------------------------------------------------------------------------------------------------------------------------------------------------------------------------------------------------------------------------------------------------------------------------------------------------------------------------------------------------------------------------------------------------------------------------------------------------------------------------------------------------------------------------------------------------------------------------------------------------------------------------------------------------------------------------------------------------------------------------------------------------------------------------------------------------------------------------------------------------------------------------------------------------------------------------------------------------------------------------------------------------------------------------------------------------------------------------------------------------------------------------------------------------------------------------------------------------------------------------------------------------------------------------------------------------------------------------------------------------------------------------------------------------------------------------------------------------------------------------------------------------------------------------------------------------------------------------------------------------------------------------------------------------------------------------------------------------------------------------------------------------------------------------------------------------------------------------------------------------------------------------------------------------------------------------------------------------------------------------------------------------------------------------------------------------------------------------------------------------------------------------------------------------|

|                                           |                 |         |     |    |                                                                                                                                                                                                                                                                                                                                                                                                                                                                                                                                                                                                                                                                                                                                                                                                                                                                                                                                                                                                                                                                                                                                                                                                                                   |                                                                                                                                                                                                                                                                                                |      |
|-------------------------------------------|-----------------|---------|-----|----|-----------------------------------------------------------------------------------------------------------------------------------------------------------------------------------------------------------------------------------------------------------------------------------------------------------------------------------------------------------------------------------------------------------------------------------------------------------------------------------------------------------------------------------------------------------------------------------------------------------------------------------------------------------------------------------------------------------------------------------------------------------------------------------------------------------------------------------------------------------------------------------------------------------------------------------------------------------------------------------------------------------------------------------------------------------------------------------------------------------------------------------------------------------------------------------------------------------------------------------|------------------------------------------------------------------------------------------------------------------------------------------------------------------------------------------------------------------------------------------------------------------------------------------------|------|
| hCoV-19/Mexico/MEX-INMEGEN-05-05-50/2021  | EPI_ISL_2444432 | B.1.1.7 | GRY | 35 | C241T,C913T,C3037T,C3267T,C5388A,C5986T,C6196T,T6954C,A8848G,C14408T,C14676T,C15279T,T16176C,G19816T,A23063T,C23271A,A23403G,C23604A,C23709T,T24506G,G24914C,G25217T,G26727T,T27285C,C27972T,G28048T,A28111G,G28280C,A28281T,T28282A,G28881A,G25882A,G28883C,C28977T,G29715T                                                                                                                                                                                                                                                                                                                                                                                                                                                                                                                                                                                                                                                                                                                                                                                                                                                                                                                                                      | M:A695,N:D3L,N:R203K,N:G204R,N:S235F,ORF1a:T1001,ORF1a:A1708D,ORF1a:I2230T,ORF1b:P314L,ORF1b:V2117L,ORF8:Q27*,ORF8:R52I,ORF8:Y73C,S:N501Y,S:A570D,S:D614G,S:P681H,S:T716I,S:S982A,S:D1118H,S:G1219C                                                                                            | 20   |
| hCoV-19/Mexico/MEX-INMEGEN-05-05-58/2021  | EPI_ISL_2444438 | B.1.1.7 | GRY | 44 | C203T,C241T,C913T,G1820A,G2588A,C3037T,C3267T,C4456T,G2588A,C5986T,T6954C,A12162G,C14408T,C14676T,C15279T,C15720T,T16176C,C16338T,A17615G,A21137G,C22858T,A23063T,C23248T,C23271A,A23403G,C23604A,G23608T,C23709T,T24506G,A24568T,G24914C,G2513T,C27972T,G28001A,G28048T,A28111G,G28280C,A28281T,T28282A,G28881A,G28882A,G28241T,C913T,C2110T,C3037T,C3267T,C5388A,C5986T,T6954C,G7042T,A10195G,C14120T,C14408T,C14676T,C15279T,T16176C,C23271A,A23403G,C23604A,A23690G,C23709T,T24506G,G2914C,C27972T,G28048T,G28075T,A28095T,A28111G,G28280C,A28281T,T28282A,C28977T,C241T,C913T,C1722T,G1957A,A2276G,G2527A,C3037T,A3094T,C3267T,G4136T,C5388A,C5986T,T6954C,C10681T,C12357T,C14408T,C14599T,C14676T,C15279T,G15372T,T16176C,G19542T,G22841A,C23271A,A23403G,C23604A,C23709T,T24506G,G24914C,G25954T,C27972T,G28048T,A28111G,G28280C,A28281T,T28282A,G28881A,G28882A,G28883C,C28977T                                                                                                                                                                                                                                                                                                                                           | N:D3L,N:R203K,N:G204R,N:S235F,ORF1a:A1708D,ORF1a:I2230T,ORF1a:Q3966R,ORF1b:P314L,ORF1b:K1383R,ORF1b:K2557R,ORF8:Q27*,ORF8:R52I,ORF8:Y73C,ORF8:N501Y,S:A570D,S:D614G,S:P681H,S:T716I,S:S982A,S:D102H,S:D1118H,S:K1191N                                                                          | 381  |
| hCoV-19/Mexico/MEX-INMEGEN-05-05-72/2021  | EPI_ISL_2444450 | B.1.1.7 | G   | 20 | C241T,C913T,C1722T,G1957A,A2276G,G2527A,C3037T,A3094T,C3267T,G4136T,C5388A,C5986T,T6954C,C10681T,C12357T,C14408T,C14599T,C14676T,C15279T,G15372T,T16176C,G19542T,G22841A,C23271A,A23403G,C23604A,C23709T,T24506G,G24914C,G25954T,C27972T,G28048T,A28111G,G28280C,A28281T,T28282A,G28881A,G28882A,G28883C,C28977T                                                                                                                                                                                                                                                                                                                                                                                                                                                                                                                                                                                                                                                                                                                                                                                                                                                                                                                  | N:D3L,N:S235F,ORF1a:T1001,ORF1a:A1708D,ORF1a:I2230T,ORF1a:M2259I,ORF1b:P218L,ORF1b:P314L,ORF8:Q27*,ORF8:R52I,ORF8:Y73C,ORF8:K68*,ORF8:Y73C,S:A570D,S:D614G,S:P681H,S:N710D,S:T716I,S:S982A,S:D1118H                                                                                            | 1539 |
| hCoV-19/Mexico/MEX-INMEGEN-05-05-96/2021  | EPI_ISL_2550741 | B.1.1.7 | GR  | 40 | C241T,C913T,C2110T,C3037T,C3267T,C3623T,T5278C,C5388A,C5986T,T6954C,G7042T,A8879G,G11083T,C14120T,C14408T,C14676T,C15279T,T16176C,G21578T,C23271A,A23403G,C23604A,C23709T,G24415T,G24914C,G25906T,C26058T,C27972T,G28048T,A28095T,A28111G,G28280C,A28281T,T28282A,G28881A,G28882A,G28883C,C28977T                                                                                                                                                                                                                                                                                                                                                                                                                                                                                                                                                                                                                                                                                                                                                                                                                                                                                                                                 | N:D3L,N:R203K,N:G204R,N:S235F,ORF1a:A486V,ORF1a:I671V,ORF1a:T1001I,ORF1a:V1291F,ORF1a:A1708D,ORF1a:I2230T,ORF1a:T4031,ORF1b:P314L,ORF1b:M2025I,ORF3a:G188C,ORF8:Q27*,ORF8:R52I,ORF8:Y73C,S:D427N,S:A570D,S:D614G,S:P681H,S:T716I,S:S982A,S:D1118H                                              | 470  |
| hCoV-19/Mexico/MEX-INMEGEN-05-06-193/2021 | EPI_ISL_2603682 | B.1.1.7 | GR  | 38 | C,A28281T,T28282A,G28881A,G28882A,G28883C,C28977T                                                                                                                                                                                                                                                                                                                                                                                                                                                                                                                                                                                                                                                                                                                                                                                                                                                                                                                                                                                                                                                                                                                                                                                 | M:A695,N:D3L,N:S235F,ORF1a:T1001,ORF1a:A1708D,ORF1a:I2230T,ORF1b:P314L,ORF1b:V2117L,ORF8:Q27*,ORF8:R52I,ORF8:Y73C,S:A570D,S:D614G,S:P681H,S:T716I,S:S982A,S:D1118H                                                                                                                             | 603  |
| hCoV-19/Mexico/MEX-INMEGEN-05-06-218/2021 | EPI_ISL_2881838 | B.1.1.7 | G   | 31 | C241T,C913T,C3037T,C3267T,C5388A,C5986T,T6954C,A8848G,C14408T,C14676T,C15279T,T16176C,G19816T,C23271A,A23403G,C23604A,C23709T,T24506G,G24914C,G25217T,G26727T,T27285C,C27972T,G28048T,A28111G,G28280C,A28281T,T28282A,C28977T,G29715T                                                                                                                                                                                                                                                                                                                                                                                                                                                                                                                                                                                                                                                                                                                                                                                                                                                                                                                                                                                             | M:A695,N:D3L,N:S235F,ORF1a:T1001,ORF1a:A1708D,ORF1a:I2230T,ORF1b:P314L,ORF1b:V2117L,ORF8:Q27*,ORF8:R52I,ORF8:Y73C,S:A570D,S:D614G,S:P681H,S:T716I,S:S982A,S:D1118H,S:G1219C                                                                                                                    | 1908 |
| hCoV-19/Mexico/MEX-INMEGEN-05-06-234/2021 | EPI_ISL_2603715 | B.1.1.7 | GRY | 42 | C241T,C913T,C2110T,C3037T,C3267T,G4160T,C5388A,C5986T,T6954C,C7299T,C11074T,C11750T,C14408T,C14676T,C15096C,C15279T,T16176C,C17977T,C18252T,T21820C,A23063T,C23271A,A23403G,C23604A,C23709T,T24506G,G24914C,G25489T,T26149C,C27972T,G28048T,G28075T,A28111G,G28280C,A28281T,T28282A,C28807T,G28881A,G28882A,G28883C,C2897241T,C913T,C2061T,C3037T,C3267T,C5388A,C5986T,T6954C,C12115T,A12162G,C14408T,T4506G,G24914C,C27855A,C27972T,G28048T,A28111G,G28280C,A28281T,T28282A,G28881A,G28882A,G28883C,C28977T                                                                                                                                                                                                                                                                                                                                                                                                                                                                                                                                                                                                                                                                                                                      | N:D3L,N:R203K,N:G204R,N:S235F,ORF1a:I92I,ORF1a:T1001I,ORF1a:V1299L,ORF1a:A1708D,ORF1a:I2230T,ORF1a:A2345V,ORF1a:K3829F,ORF1b:P314L,ORF1b:K1383R,ORF1b:K2557R,ORF3a:A33S,ORF3a:S253P,ORF8:Q27*,ORF8:R52I,ORF8:Y73C,ORF8:K68*,ORF8:Y73C,S:N501Y,S:A570D,S:D614G,S:P681H,S:T716I,S:S982A,S:D1118H | 15   |
| hCoV-19/Mexico/MEX-INMEGEN-05-06-235/2021 | EPI_ISL_2603716 | B.1.1.7 | GRY | 34 | 28882A,G28883C,C28977T                                                                                                                                                                                                                                                                                                                                                                                                                                                                                                                                                                                                                                                                                                                                                                                                                                                                                                                                                                                                                                                                                                                                                                                                            | N:D3L,N:R203K,N:G204R,N:S235F,ORF1a:A599V,ORF1a:T1001I,ORF1a:A1708D,ORF1b:K1383R,ORF1b:D2270Y,ORF1b:L34M,ORF8:Q27*,ORF8:R52I,ORF8:Y73C,S:N501Y,S:A570D,S:D614G,S:P681H,S:T716I,S:S982A,S:D1118H                                                                                                | 339  |
| hCoV-19/Mexico/MEX-INMEGEN-05-06-250/2021 | EPI_ISL_2603723 | B.1.1.7 | GR  | 20 | C241T,C913T,C3037T,C3267T,C5388A,C5986T,T6954C,A8848G,C14408T,C14676T,C15279T,T16176C,G19816T,C23271A,A23403G,C23604A,C23709T,T24506G,G24914C,G25217T,G26727T,T27285C,C27972T,G28048T,A28111G,G28280C,A28281T,T28282A,G28881A,G28882A,G28883C,C28977T,G29715T                                                                                                                                                                                                                                                                                                                                                                                                                                                                                                                                                                                                                                                                                                                                                                                                                                                                                                                                                                     | M:A695,N:D3L,N:R203K,N:G204R,N:S235F,ORF1a:T1001I,ORF1a:A1708D,ORF1a:I2230T,ORF1b:P218L,ORF1b:P314L,ORF1b:V2117L,ORF8:Q27*,ORF8:R52I,ORF8:Y73C,S:A570D,S:D614G,S:P681H,S:T716I,S:S982A,S:D1118H,S:G1219C                                                                                       | 1247 |
| hCoV-19/Mexico/MEX-INMEGEN-05-06-310/2021 | EPI_ISL_2603772 | B.1.1.7 | GRY | 34 | 06G,G24914C,C27972T,G28048T,A28111G,G28280C,A28281T,T28282A,G28881A,G28882A,G28883C,C241T,C913T,C3037T,C3267T,G4392G,C4331T,C5388A,C5986T,T6954C,C14408T,C14676T,C15279T,T16176C,C18555T,C21639A,A23063T,C23271A,A23403G,C23604A,C23709T,C24374T,T24506G,G24914C,C27972T,G28048T,A28111G,G28280C,A28281T,T28282A,G28881A,G28882A,G28883C,C241T,C913T,C3037T,C3267T,G4392G,C4331T,C5388A,C5986T,T6954C,C14408T,C14676T,C15279T,T16176C,C18555T,C21639A,A23063T,C23271A,A23403G,C23604A,C23709T,C24374T,T24506G,G24914C,C27972T,G28048T,A28111G,G28280C,A28281T,T28282A,G28881A,G28882A,G28883C,C241T,C913T,C2453T,C3037T,C3267T,C3695T,C5388A,C5986T,T6954C,C9611T,C9693T,C14408T,C14676T,C15279T,T16176C,C21008T,C21855T,G21974C,A23063T,C23271A,A23403G,C23604A,C23709T,T24506G,G24914C,C27643T,C27972T,G28048T,A28111G,G28282A,A28295G,G28881A,G28882A,G28883C,C28977T                                                                                                                                                                                                                                                                                                                                                          | N:D3L,N:R203K,N:G204R,N:S235F,ORF1a:A1708D,ORF1a:I2230T,ORF1b:P314L,ORF8:Q27*,ORF8:R52I,ORF8:Y73C,S:P26H,S:N501Y,S:A570D,S:D614G,S:P681H,S:T716I,S:S982A,S:D1118H                                                                                                                              | 262  |
| hCoV-19/Mexico/MEX-INMEGEN-05-06-340/2021 | EPI_ISL_2603791 | B.1.1.7 | GRY | 25 | A,G28882A,G28883C,C28977T                                                                                                                                                                                                                                                                                                                                                                                                                                                                                                                                                                                                                                                                                                                                                                                                                                                                                                                                                                                                                                                                                                                                                                                                         | N:D3L,N:R203K,N:G204R,N:S235F,ORF1a:T1001I,ORF1a:A1708D,ORF1a:I2230T,ORF1b:P218L,ORF1b:P314L,ORF1b:L1351F,ORF1b:P1975S,ORF8:Q27*,ORF8:R52I,ORF8:K68*,ORF8:Y73C,ORF8:P855S,S:N501Y,S:A570D,S:D614G,S:P681H,S:T716I,S:S982A,S:D1118H                                                             | 3    |
| hCoV-19/Mexico/MEX-INMEGEN-05-06-345/2021 | EPI_ISL_2603796 | B.1.1.7 | GRY | 42 | T,A12964G,C14120T,C14408T,C14676T,C15279T,T16176C,C16323T,C16575T,C17004T,C17518T,C19390T,A23063T,C23271A,A23403G,C23604A,C23709T,T24506G,G24914C,C27972T,G28048T,A28095T,A28111G,C28146T,G28280C,A28281T,T28282A,G28881A,G28882A,G28883C,C2897241T,C913T,G1264A,C2110T,C3037T,C3267T,C5388A,C5986T,T6954C,T7984C,T9508C,C10747A,I2964G,C14120T,C14408T,C14676T,C15279T,T16176C,C16323T,C16575T,C17004T,C17518T,C19390T,A23063T,C23271A,A23403G,C23604A,C23709T,T24506G,G24914C,C27972T,G28048T,A28095T,A28111G,C28146T,G28280C,A28281T,T28282A,G28881A,G28882A,G28883C,C2897241T,C913T,G1264A,C2110T,C3037T,C3267T,C5388A,C5986T,T6954C,T7984C,T9508C,C10747A,I2964G,C14120T,C14408T,C14676T,C15279T,T16176C,C16323T,C16575T,C17004T,C17518T,C19390T,A23063T,C23271A,A23403G,C23604A,C23709T,T24506G,G24914C,C27972T,G28048T,A28095T,A28111G,C28146T,G28280C,A28281T,T28282A,G28881A,G28882A,G28883C,C2897241T,C913T,T1177C,T1537G,C2110T,G2528A,C3037T,C3267T,C4296T,C5142T,C5388A,C5986T,T6954C,G7042T,C10789T,C14120T,C14408T,C14676T,C15279T,T16176C,C20470A,C23271A,A23403G,C23604A,C23709T,T24506G,G24914C,G25354T,C26606T,G27281T,G27827T,C27972T,G28048T,A28111G,G28280C,A28281T,T28282A,A28877T,C28977T,A29491G,C29769T | N:D3L,N:R203K,N:G204R,N:S235F,ORF1a:T1001I,ORF1a:A1708D,ORF1a:I2230T,ORF1b:P218L,ORF1b:P314L,ORF1b:L1351F,ORF1b:P1975S,ORF8:Q27*,ORF8:R52I,ORF8:K68*,ORF8:Y73C,ORF8:P855S,S:N501Y,S:A570D,S:D614G,S:P681H,S:T716I,S:S982A,S:D1118H                                                             | 262  |
| hCoV-19/Mexico/MEX-INMEGEN-05-06-356/2021 | EPI_ISL_2603803 | B.1.1.7 | GRY | 42 | T,A28095T,A28111G,C28146T,G28280C,A28281T,T28282A,G28881A,G28882A,G28883C,C2897241T,C913T,T1177C,T1537G,C2110T,G2528A,C3037T,C3267T,C4296T,C5142T,C5388A,C5986T,T6954C,G7042T,C10789T,C14120T,C14408T,C14676T,C15279T,T16176C,C20470A,C23271A,A23403G,C23604A,C23709T,T24506G,G24914C,G25354T,C26606T,G27281T,G27827T,C27972T,G28048T,A28111G,G28280C,A28281T,T28282A,A28877T,C28977T,A29491G,C29769T                                                                                                                                                                                                                                                                                                                                                                                                                                                                                                                                                                                                                                                                                                                                                                                                                             | N:D3L,N:S235F,ORF1a:E755K,ORF1a:T1001I,ORF1a:I1344I,ORF1a:I1626I,ORF1a:A1708D,ORF1a:I2230T,ORF1a:M2259I,ORF1b:P218L,ORF1b:P314L,ORF1b:Q2335K,ORF3a:D27Y,ORF8:Q27*,ORF8:R52I,ORF8:Y73C,S:A570D,S:D614G,S:P681H,S:T716I,S:S982A,S:D1118H                                                         | 16   |
| hCoV-19/Mexico/MEX-INMEGEN-05-06-357/2021 | EPI_ISL_2603804 | B.1.1.7 | G   | 38 | 28111G,G28280C,A28281T,T28282A,C28977T,C29167T                                                                                                                                                                                                                                                                                                                                                                                                                                                                                                                                                                                                                                                                                                                                                                                                                                                                                                                                                                                                                                                                                                                                                                                    | N:D3L,N:S235F,ORF1a:E755K,ORF1a:T1001I,ORF1a:I1344I,ORF1a:I1626I,ORF1a:A1708D,ORF1a:I2230T,ORF1a:M2259I,ORF1b:P218L,ORF1b:P314L,ORF1b:Q2335K,ORF3a:D27Y,ORF8:Q27*,ORF8:R52I,ORF8:Y73C,S:A570D,S:D614G,S:P681H,S:T716I,S:S982A,S:D1118H                                                         | 937  |
| hCoV-19/Mexico/MEX-INMEGEN-06-01-10/2021  | EPI_ISL_2616828 | B.1.1.7 | GRY | 31 | 217T,G26727T,G28280C,A28281T,T28282A,G28881A,G28882A,G28883C,C28977T,G29715T                                                                                                                                                                                                                                                                                                                                                                                                                                                                                                                                                                                                                                                                                                                                                                                                                                                                                                                                                                                                                                                                                                                                                      | M:A695,N:D3L,N:R203K,N:G204R,N:S235F,ORF1a:T1001I,ORF1a:A1708D,ORF1a:I2230T,ORF1b:P314L,S:N501Y,S:A570D,S:D614G,S:P681H,S:T716I,S:S982A,S:D1118H,S:G1219C                                                                                                                                      | 1058 |
| hCoV-19/Mexico/MEX-INMEGEN-06-01-117/2021 | EPI_ISL_2616849 | B.1.1.7 | GR  | 24 | C241T,C913T,T1177C,T1537G,C2110T,G2528A,C3037T,C3267T,C4296T,C5142T,C5388A,C5986T,T6954C,G7042T,C10789T,C14120T,C14408T,C14676T,C15279T,T16176C,A19950G,C20470A,C23271A,A23403G,C23604A,C23709T,G23749A,T24506G,G24914C,C25452T,G25471T,C27972T,G28048T,A28111G,G28280C,A28281T,T28282A,G28881A,G28882A,G28883C,C28977T,C29167T                                                                                                                                                                                                                                                                                                                                                                                                                                                                                                                                                                                                                                                                                                                                                                                                                                                                                                   | N:D3L,N:S235F,ORF1a:L454F,ORF1a:T1001I,ORF1a:A1708D,ORF1a:I2230T,ORF1a:A2345V,ORF1b:M101I,ORF1b:P314L,ORF1b:A2132V,ORF1b:P218L,ORF1b:P314L,ORF1b:M24I,ORF8:Q27*,ORF8:R52I,ORF8:Y73C,S:N501Y,S:A570D,S:D614G,S:P681H,S:T716I,S:S982A,S:D1118H                                                   | 882  |
| hCoV-19/Mexico/MEX-INMEGEN-06-01-148/2021 | EPI_ISL_2616949 | B.1.1.7 | G   | 22 | A28111G,G28280C,A28281T,T28282A,A28877T,C28977T,A29491G,C29769T                                                                                                                                                                                                                                                                                                                                                                                                                                                                                                                                                                                                                                                                                                                                                                                                                                                                                                                                                                                                                                                                                                                                                                   | N:D3L,N:R203K,N:G204R,N:S235F,ORF1a:T1001I,ORF1a:A1708D,ORF1a:I2230T,ORF1a:A2345V,ORF1a:K3829F,ORF1b:P314L,ORF1b:A2345V,ORF1b:K3829F,ORF1b:K2557R,ORF8:Q27*,ORF8:R52I,ORF8:Y73C,S:A570D,S:D614G,S:P681H,S:T716I,S:S982A,S:D1118H                                                               | 366  |
| hCoV-19/Mexico/MEX-INMEGEN-06-01-154/2021 | EPI_ISL_2616888 | B.1.1.7 | GR  | 37 | 8282A,C28807T,G28881A,G28882A,G28883C,C28977T                                                                                                                                                                                                                                                                                                                                                                                                                                                                                                                                                                                                                                                                                                                                                                                                                                                                                                                                                                                                                                                                                                                                                                                     | N:D3L,N:R203K,N:G204R,N:S235F,ORF1a:T1001I,ORF1a:A1708D,ORF1a:I2230T,ORF1a:A2345V,ORF1a:K3829F,ORF1b:P314L,ORF1b:A2345V,ORF1b:K3829F,ORF1b:K2557R,ORF8:Q27*,ORF8:R52I,ORF8:Y73C,S:A570D,S:D614G,S:P681H,S:T716I,S:S982A,S:D1118H                                                               | 680  |
| hCoV-19/Mexico/MEX-INMEGEN-06-01-25/2021  | EPI_ISL_2616824 | B.1.1.7 | GR  | 37 | 281T,T28282A,G28881A,G28882A,G28883C,C28977T                                                                                                                                                                                                                                                                                                                                                                                                                                                                                                                                                                                                                                                                                                                                                                                                                                                                                                                                                                                                                                                                                                                                                                                      | N:D3L,N:R203K,N:G204R,N:S235F,ORF1a:G5195,ORF1a:T1001I,ORF1a:A1708D,ORF1a:I1887I,ORF1a:I2230T,ORF1a:M3087I,ORF1a:Q3966R,ORF1b:P314L,ORF1b:K1383R,ORF1b:K2557R,ORF8:Q27*,ORF8:R52I,ORF8:Y73C,S:A570D,S:D614G,S:P681H,S:T716I,S:S982A,S:D1118H,S:K1191N                                          | 1066 |



|                                              |                 |         |     |    |                                                                                                                                                                                                                                                                                                                               |                                                                                                                                                                                                                                                                  |    |      |
|----------------------------------------------|-----------------|---------|-----|----|-------------------------------------------------------------------------------------------------------------------------------------------------------------------------------------------------------------------------------------------------------------------------------------------------------------------------------|------------------------------------------------------------------------------------------------------------------------------------------------------------------------------------------------------------------------------------------------------------------|----|------|
| hCoV-19/Mexico/MEX-INMEGEN-06-01-34/2021     | EPI_ISL_2618978 | B.1.1.7 | GR  | 41 | C241T,C913T,G1069A,C1609T,C3037T,T3049C,C3267T,C5388A,G5558A,C5986T,T6954C,A12162 G,G14294A,C14408T,C14676T,C15279T,C15450T,C15720T,T16176C,A17615G,C18329T,A21137 G,C22636T,C23271A,A23403G,C23604A,C23709T,T24506G,G24914C,G25135T,C27972T,G2804 8T,A28111G,G28280C,A28281T,T28282A,G28881A,G28882A,G28883C,G28916A,C28977T | N:D3L,N:R203K,N:G204R,N:G215S,N:S235F,ORF1a:T1001,ORF1a:A1708D,OR F1a:V1765,ORF1a:I2230T,ORF1a:Q3966R,ORF1b:P314L,ORF1b:K1383R,ORF1b:K2557R,ORF8:Q27*,ORF8:R52I,ORF8:Y73C,S:A570D,S:D614G,S:P681H,S:T716I,S:S982A,S:D1118H,S:K1191N                              | 25 | 2595 |
| hCoV-19/Mexico/MEX-INMEGEN-06-01-77/2021     | EPI_ISL_2616998 | B.1.1.7 | GR  | 41 | C241T,C913T,G2281A,C3037T,A3061G,C3267T,C5388A,C5986T,T6954C,A12162G,C13665T,C14 408T,C14676T,C15279T,C15720T,T16176C,A17615G,C18747T,C20844T,A21137G,C23271A,A23 403G,C23604A,C23709T,T24506G,G24914C,G25135T,C26521T,G26282T,C27972T,G2 8048T,A28111G,G28280C,A28281T,T28282A,G28881A,G28882A,G28883C,C28977T,C29095T       | N:D3L,N:R203K,N:G204R,N:G215S,N:S235F,ORF1a:T1001,ORF1a:A1708D,ORF1a:I2230 T,ORF1a:Q3966R,ORF1b:P314L,ORF1b:K1383R,ORF1b:K2557R,ORF3a:P240S, ORF8:Q27*,ORF8:R52I,ORF8:Y73C,S:A570D,S:D614G,S:P681H,S:T716I,S:S982A                                               | 22 | 1663 |
| hCoV-19/Mexico/MEX-INMEGEN-06-01-9/2021      | EPI_ISL_2616850 | B.1.1.7 | G   | 26 | 727T,C27874T,G28881T,C28977T,G29715T                                                                                                                                                                                                                                                                                          | M:A69S,N:R203M,N:S235F,ORF1a:T1001,ORF1a:A1708D,ORF1a:P2046L,OR F1a:I2230T,ORF1b:P314L,ORF7b:T401S,A570D,S:D614G,S:P681H,S:T716I,S:S98 2A,S:D1118H,S:G1219C                                                                                                      | 8  | 882  |
| hCoV-19/Mexico/MEX-INMEGEN-06-02-194/2021    | EPI_ISL_2778956 | B.1.1.7 | GR  | 82 | C241T,C913T,C2453T,C3037T,C3267T,A3481T,C5388A,C5986T,T6954C,C9611T,C10543T,C1440 8T,C14676T,C15279T,T16176C,C21008T,C21855T,G21974C,C23271A,A23403G,C23604A,C2370 9T,T24506G,G24914C,G25437T,C27643T,C27972T,G28048T,A28111G,G28280C,A28281T,T28 282A,A28295G,G28881A,G28882A,G28883C,C28977T                                | N:D3L,N:N8D,N:R203K,N:G204R,N:S235F,ORF1a:T730F,ORF1a:T1001,ORF1a: A1708D,ORF1a:I2230T,ORF1a:L3116F,ORF1b:P314L,ORF1b:T2514I,ORF3a:L1 5F,ORF7a:P84S,ORF8:Q27*,ORF8:R52I,ORF8:Y73C,S:S98F,S:D138H,S:A570D,S: D614G,S:P681H,S:T716I,S:S982A,S:D1118H               | 6  | 1653 |
| hCoV-19/Mexico/MEX-INMEGEN-06-02-240/2021    | EPI_ISL_2692750 | B.1.1.7 | GRY | 40 | T28280C,A28281T,T28282A,G28881A,G28882A,G28883C,C28977T                                                                                                                                                                                                                                                                       | N:D3L,N:R203K,N:G204R,N:S235F,ORF1a:T1001,ORF1a:M1586 I,ORF1a:A1708D,ORF1a:V1887I,ORF1a:I2230T,ORF1a:M3087I,ORF1a:Q3966R, ORF1b:P314L,ORF1b:K1383R,ORF1b:K2557R,ORF8:Q27*,ORF8:R52I,ORF8:Y7 3C,S:N501Y,S:A570D,S:D614G,S:P681H,S:T716I,S:S982A,S:D1118H,S:K1191N | 6  | 413  |
| hCoV-19/Mexico/MEX-INMEGEN-06-02-293/2021    | EPI_ISL_2692787 | B.1.1.7 | GR  | 39 | G28280C,A28281T,T28282A,G28881A,G28882A,G28883C,C28977T                                                                                                                                                                                                                                                                       | N:D3L,N:R203K,N:G204R,N:S235F,ORF1a:T1001,ORF1a:A1708D,ORF1a:I2230 T,ORF1a:P3613I,ORF1a:I218F,ORF1b:K1383R,ORF1b:P314L,ORF8:Q27*,ORF8 :R52I,ORF8:Y73C,S:A570D,S:D614G,S:P681H,S:T716I,S:S982A,S:D1118H                                                           | 20 | 370  |
| hCoV-19/Mexico/MEX-INMEGEN-06-03-129/2021    | EPI_ISL_2810121 | B.1.1.7 | GRY | 36 | 881A,G28882A,G28883C,C28977T,G29715T                                                                                                                                                                                                                                                                                          | M:A69S,N:D3L,N:R203K,N:G204R,N:S235F,ORF1a:T1001,ORF1a:A1708D,OR F1a:I2230T,ORF1b:P314L,ORF1b:P976S,ORF8:Q27*,ORF8:R52I,OR F8:Y73C,S:N501Y,S:A570D,S:D614G,S:P681H,S:T716I,S:S982A,S:D1118H,S:G 1219C                                                            | 22 | 892  |
| hCoV-19/Mexico/MEX-INMEGEN-06-03-135/2021    | EPI_ISL_2810126 | B.1.1.7 | GRY | 36 | 81A,G28882A,G28883C,C28977T,G29715T                                                                                                                                                                                                                                                                                           | M:A69S,N:D3L,N:R203K,N:G204R,N:S235F,ORF1a:S279F,ORF1a:T1001,ORF1a :A1708D,ORF1a:I2230T,ORF1b:P314L,ORF1b:M1137I,ORF8:Q27*,ORF8:R52I,O RF8:Y73C,S:N501Y,S:A570D,S:D614G,S:P681H,S:T716I,S:S982A,S:D1118H,S:G 1219C                                               | 22 | 0    |
| hCoV-19/Mexico/MEX-INMEGEN-06-03-136/2021    | EPI_ISL_2810207 | B.1.1.7 | GR  | 42 | 7972T,G28048T,A28111G,G28280C,A28281T,T28282A,G28881A,G28882A,G28883C,C28977T,C                                                                                                                                                                                                                                               | N:D3L,N:R203K,N:G204R,N:S235F,ORF1a:T1001,ORF1a:A1708D,ORF1a:I2230 T,ORF1a:Q3966R,ORF1b:P314L,ORF1b:K1383R,ORF1b:K2557R,ORF3a:P240S, ORF8:Q27*,ORF8:R52I,ORF8:Y73C,S:N501Y,S:A570D,S:D614G,S:P681H,S:T716 I,S:S982A,S:D1118H,S:K1191N                            | 23 | 126  |
| hCoV-19/Mexico/Mexico-INMEGEN-06-03-159/2021 | EPI_ISL_2810146 | B.1.1.7 | GRY | 42 | 7972T,G28048T,A28111G,G28280C,A28281T,T28282A,G28881A,G28882A,G28883C,C28977T,C                                                                                                                                                                                                                                               | N:D3L,N:R203K,N:G204R,N:S235F,ORF1a:T1001,ORF1a:A1708D,ORF1a:I2230 T,ORF1a:Q3966R,ORF1b:P314L,ORF1b:K1383R,ORF1b:K2557R,ORF3a:P240S, ORF8:Q27*,ORF8:R52I,ORF8:Y73C,S:N501Y,S:A570D,S:D614G,S:P681H,S:T716 I,S:S982A,S:D1118H,S:K1191N                            | 23 | 1258 |
| hCoV-19/Mexico/MEX-INMEGEN-06-03-160/2021    | EPI_ISL_2810147 | B.1.1.7 | GRY | 37 | 281T,T28282A,G28881A,G28882A,G28883C,C28977T                                                                                                                                                                                                                                                                                  | N:D3L,N:N8D,N:R203K,N:G204R,N:S235F,ORF1a:L730F,ORF1a:A1708D,ORF1a:T 1001,ORF1a:A1708D,ORF1a:I2230T,ORF1b:P314L,ORF1b:K1383R,ORF1b:K2557R,ORF3a:P240S, ORF8:Q27*,ORF8:R5 2I,ORF8:Y73C,S:S98F,S:D138H,S:N501Y,S:A570D,S:D614G,S:P681H,S:T716I,S: S982A,S:D1118H   | 6  | 16   |
| hCoV-19/Mexico/MEX-INMEGEN-06-03-185/2021    | EPI_ISL_2810167 | B.1.1.7 | GRY | 40 | G28280C,A28281T,T28282A,G28295G,G28881A,G28882A,G28883C,C28977T                                                                                                                                                                                                                                                               | N:D3L,N:R203K,N:G204R,N:S235F,ORF1a:T1001,ORF1a:A1708D,ORF1a:I2230 T,ORF1a:Q3966R,ORF1b:P314L,ORF1b:K1383R,ORF1b:K2557R,ORF3a:P240S, ORF8:Q27*,ORF8:R52I,ORF8:Y73C,S:S98F,S:D138H,S:N501Y,S:A570D,S:D614G,S: P681H,S:T716I,S:S982A,S:D1118H                      | 29 | 774  |
| hCoV-19/Mexico/MEX-INMEGEN-06-03-193/2021    | EPI_ISL_2810174 | B.1.1.7 | GR  | 39 | 82A,A284666,G28881A,G28882A,G28883C,C28977T,C29642T                                                                                                                                                                                                                                                                           | N:D3L,N:K65E,N:R203K,N:G204R,N:S235F,ORF1a:T1001,ORF1a:A1708D,ORF 1a:I2230T,ORF1b:P314L,ORF3a:W131C,ORF7a:T28I,ORF7a:P34L,ORF8:E19*,O RF8:Q27*,ORF8:R52I,ORF8:K68*,ORF8:Y73C,S:A570D,S:D614G,S:P681H,S:T71 6I,S:S982A,S:D1118H                                   | 23 | 1796 |
| hCoV-19/Mexico/MEX-INMEGEN-06-03-62/2021     | EPI_ISL_2810072 | B.1.1.7 | GRY | 37 | 281T,T28282A,G28881A,G28882A,G28883C,C28977T                                                                                                                                                                                                                                                                                  | N:D3L,N:R203K,N:G204R,N:S235F,ORF1a:T1001,ORF1a:A1708D,ORF1a:I2230 T,ORF1a:M2259I,ORF1b:P218L,ORF1b:P314L,ORF7a:R118G,ORF8:Q27*,ORF8: R52I,ORF8:Y73C,S:N501Y,S:A570D,S:D614G,S:P681H,S:G1219C                                                                    | 23 | 2    |
| hCoV-19/Mexico/MEX-INMEGEN-06-03-69/2021     | EPI_ISL_2810078 | B.1.1.7 | GRY | 32 | 77T                                                                                                                                                                                                                                                                                                                           | N:R203K,N:G204R,N:S235F,ORF1a:P971I,ORF1a:T1001,ORF1a:A1708D,ORF1 a:H1738Q,ORF1a:I2230T,ORF1a:E2268R,ORF1b:P314L,ORF7b:H42V,ORF8:Q2 7*,ORF8:R52I,ORF8:Y73C,S:N501Y,S:A570D,S:D614G,S:P681H,S:T716I,S:S982A                                                       | 22 | 21   |
| hCoV-19/Mexico/MEX-INMEGEN-06-04-375/2021    | EPI_ISL_2894414 | B.1.1.7 | GRY | 36 | 282A,G28881A,G28882A,G28883C,C28977T                                                                                                                                                                                                                                                                                          | N:D3L,N:R203K,N:G204R,N:S235F,ORF1a:T1001,ORF1a:A1708D,ORF1a:I2230 T,ORF1a:M2259I,ORF1b:P218L,ORF1b:P314L,ORF7a:R118G,ORF8:Q27*,ORF8: R52I,ORF8:Y73C,S:N501Y,S:A570D,S:D614G,S:P681H,S:G1219C                                                                    | 23 | 170  |
| hCoV-19/Mexico/MEX-INMEGEN-16-260/2021       | EPI_ISL_2978574 | B.1.1.7 | GRY | 43 | 2T,G28048T,A28095T,A28111G,G28280C,A28281T,T28282A,G28881A,G28882A,G28883C,C289 77T,C29167T,C29642T                                                                                                                                                                                                                           | N:D3L,N:R203K,N:G204R,N:S235F,ORF1a:T1001,ORF1a:A1708D,ORF1a:I2230 T,ORF1a:M2259I,ORF1b:P218L,ORF1b:P314L,ORF7a:R118G,ORF8:Q27*,ORF8: R52I,ORF8:Y73C,S:N501Y,S:A570D,S:D614G,S:P681H,S:T716I,S:S982A,S:D1118 H                                                   | 27 | 48   |
| hCoV-19/Mexico/MEX-INMEGEN-16-262/2021       | EPI_ISL_2978576 | B.1.1.7 | GRY | 43 | T28280C,A28281T,T28282A,G28881A,G28882A,G28883C,C28977T                                                                                                                                                                                                                                                                       | N:D3L,N:R203K,N:G204R,N:S235F,ORF1a:T1001,ORF1a:A1708D,ORF1a:I2230 T,ORF1a:M2259I,ORF1b:P218L,ORF1b:P314L,ORF7a:R118G,ORF8:Q27*,ORF8: R52I,ORF8:Y73C,S:N501Y,S:A570D,S:D614G,S:P681H,S:T716I,S:S982A,S:D1118 H                                                   | 28 | 208  |
| hCoV-19/Mexico/MEX-INMEGEN-16-263/2021       | EPI_ISL_2978577 | B.1.1.7 | GRY | 39 | 1G,G28280C,A28281T,T28282A,G28881A,G28882A,G28883C,C28977T                                                                                                                                                                                                                                                                    | N:D3L,N:R203K,N:G204R,N:S235F,ORF1a:T1001,ORF1a:A1708D,ORF1a:I2230 T,ORF1a:M2259I,ORF1b:P218L,ORF1b:P314L,ORF7a:R118G,ORF8:Q27*,ORF8: R52I,ORF8:Y73C,S:N501Y,S:A570D,S:D614G,S:P681H,S:T716I,S:S982A,S:D1118 H                                                   | 24 | 205  |



| Accession                                   | Country/Region | Local ID        | Date | Genome Type | NCBI RefSeq ID | NCBI RefSeq Description | NCBI RefSeq Accession                                                                                                                                                                                                                                                          | NCBI RefSeq Description                                                                                                                                                                                                                                                           | NCBI RefSeq Accession | NCBI RefSeq Description | NCBI RefSeq Accession | NCBI RefSeq Description |
|---------------------------------------------|----------------|-----------------|------|-------------|----------------|-------------------------|--------------------------------------------------------------------------------------------------------------------------------------------------------------------------------------------------------------------------------------------------------------------------------|-----------------------------------------------------------------------------------------------------------------------------------------------------------------------------------------------------------------------------------------------------------------------------------|-----------------------|-------------------------|-----------------------|-------------------------|
| hCoV-19/Mexico/NLE-IndRE_FB16950_S3122/2021 | Mexico         | EPI_ISL_2663389 | 2021 | B.1.1.7     | GRY            | 38                      | T,28280A,28295G,G28881A,G28882A,G28883C,C28977T                                                                                                                                                                                                                                | N:D3L,N:N8D,N:R203K,N:G204R,N:S235F,ORF1a:1730F,ORF1a:T1001,ORF1a:A1708D,ORF1a:I2230T,ORF1a:S2242F,ORF1a:L3116F,ORF1b:P314L,ORF3a:S165F,ORF8:Q277,ORF8:R52I,ORF8:Y73C,ORF8:Y73S,ORF8:S2138H,SN501Y,S:A570D,S:D614G,S:P681H,S:T716I,S:S982A,S:D1118H                               | 6                     | 0                       |                       |                         |
| hCoV-19/Mexico/NLE-IndRE_FB16953_S3123/2021 | Mexico         | EPI_ISL_2663390 | 2021 | B.1.1.7     | GRY            | 39                      | G,28280C,A28281T,T28282A,G28881A,G28882A,G28883C,C28977T                                                                                                                                                                                                                       | N:D3L,N:R203K,N:G204R,N:S235F,ORF1a:T1001,ORF1a:I2230T,ORF1a:A1708D,ORF1a:P2079S,ORF1a:I2230T,ORF1a:M2259I,ORF1b:P218L,ORF1b:P314L,ORF8:Q277,ORF8:R52I,ORF8:C61F,ORF8:K68*F,ORF8:Y73C,ORF8:Y73S,ORF8:S2262V,SN501Y,S:A570D,S:D614G,S:P681H,S:T716I,S:S982A,S:D1118H               | 6                     | 83                      |                       |                         |
| hCoV-19/Mexico/NLE-IndRE_FB16961_S3124/2021 | Mexico         | EPI_ISL_2663391 | 2021 | B.1.1.7     | GRY            | 40                      | G,28280C,A28281T,T28282A,G28881A,G28882A,G28883C,C28977T                                                                                                                                                                                                                       | N:D3L,N:R203K,N:G204R,N:S235F,ORF1a:T1001,ORF1a:D1547Y,ORF1a:A1708D,ORF1a:E2020V,ORF1a:I2230T,ORF1a:M2259I,ORF1a:L3116F,ORF1b:P218L,ORF1b:P314L,ORF7a:R118G,ORF8:Q277,ORF8:R52I,ORF8:C61F,ORF8:K68*O                                                                              | 6                     | 0                       |                       |                         |
| hCoV-19/Mexico/NLE-IndRE_FB16964_S3125/2021 | Mexico         | EPI_ISL_2663392 | 2021 | B.1.1.7     | GRY            | 41                      | T,28280C,A28281T,T28282A,T28688C,G28881A,G28882A,G28883C,C28977T                                                                                                                                                                                                               | N:D3L,N:R203K,N:G204R,N:S235F,ORF1a:P971L,ORF1a:T1001,ORF1a:T1542I,ORF1a:A1708D,ORF1a:I2230T,ORF1a:M2259I,ORF1a:D3222N,ORF1a:T4159I,ORF1b:P218L,ORF1b:P314L,ORF8:Q277,ORF8:P36G,ORF8:R52I,ORF8:C61F,ORF8:K68*O                                                                    | 6                     | 0                       |                       |                         |
| hCoV-19/Mexico/NLE-IndRE_FB17360_S3921/2021 | Mexico         | EPI_ISL_2858935 | 2021 | Q.3         | GRY            | 37                      | 282A,G28881A,G28882A,G28883C,C28977T,G29440T                                                                                                                                                                                                                                   | N:D3L,N:R203K,N:G204R,N:S235F,ORF1a:P971L,ORF1a:T1001,ORF1a:T1542I,ORF1a:A1708D,ORF1a:I2230T,ORF1a:M2259I,ORF1a:D3222N,ORF1a:T4159I,ORF1b:P218L,ORF1b:P314L,ORF8:Q277,ORF8:P36G,ORF8:R52I,ORF8:C61F,ORF8:Y73C,SN501Y,S:A570D,S:D614G,S:P681H,S:T716I,S:S982A,S:D1118H             | 6                     | 0                       |                       |                         |
| hCoV-19/Mexico/NLE-IndRE_FB17366_S3922/2021 | Mexico         | EPI_ISL_2858936 | 2021 | B.1.1.7     | GRY            | 42                      | T,28280C,A28281T,T28282A,T28688C,G28881A,G28882A,G28883C,C28977T                                                                                                                                                                                                               | N:D3L,N:R203K,N:G204R,N:S235F,ORF1a:P971L,ORF1a:T1001,ORF1a:T1542I,ORF1a:A1708D,ORF1a:I2230T,ORF1a:M2259I,ORF1a:D3222N,ORF1a:T4159I,ORF1b:P218L,ORF1b:P314L,ORF8:Q277,ORF8:P36G,ORF8:R52I,ORF8:C61F,ORF8:Y73C,SN501Y,S:A570D,S:D614G,S:P681H,S:T716I,S:S982A,S:D1118H             | 6                     | 0                       |                       |                         |
| hCoV-19/Mexico/NLE-IndRE_FB17368_S3923/2021 | Mexico         | EPI_ISL_2858937 | 2021 | B.1.1.7     | GRY            | 41                      | T,28280C,A28281T,T28282A,T28688C,G28881A,G28882A,G28883C,C28977T                                                                                                                                                                                                               | N:D3L,N:R203K,N:G204R,N:S235F,ORF1a:P971L,ORF1a:T1001,ORF1a:T1542I,ORF1a:A1708D,ORF1a:I2230T,ORF1a:M2259I,ORF1a:D3222N,ORF1a:T4159I,ORF1b:P218L,ORF1b:P314L,ORF8:Q277,ORF8:P36G,ORF8:R52I,ORF8:C61F,ORF8:Y73C,SN501Y,S:A570D,S:D614G,S:P681H,S:T716I,S:S982A,S:D1118H             | 6                     | 0                       |                       |                         |
| hCoV-19/Mexico/NLE-IndRE_FB18082_S4116/2021 | Mexico         | EPI_ISL_2920687 | 2021 | B.1.1.7     | GRY            | 42                      | T,28280C,A28281T,T28282A,T28688C,G28881A,G28882A,G28883C,C28977T                                                                                                                                                                                                               | N:D3L,N:R203K,N:G204R,N:S235F,ORF1a:P971L,ORF1a:T1001,ORF1a:T1542I,ORF1a:A1708D,ORF1a:I2230T,ORF1a:M2259I,ORF1a:D3222N,ORF1a:T4159I,ORF1b:P218L,ORF1b:P314L,ORF8:Q277,ORF8:P36G,ORF8:R52I,ORF8:C61F,ORF8:Y73C,SN501Y,S:A570D,S:D614G,S:P681H,S:T716I,S:S982A,S:D1118H,S:E1258D    | 6                     | 0                       |                       |                         |
| hCoV-19/Mexico/NLE-IndRE_FB18085_S4117/2021 | Mexico         | EPI_ISL_2920688 | 2021 | B.1.1.7     | GRY            | 44                      | T,28280C,A28281T,T28282A,T28688C,G28881A,G28882A,G28883C,C28977T                                                                                                                                                                                                               | N:D3L,N:P80Q,N:R203K,N:G204R,N:S235F,ORF1a:A2675F,ORF1a:T1001,ORF1a:A1708D,ORF1a:I2230T,ORF1a:M2259I,ORF1a:I2230T,ORF1b:P218L,ORF1b:P314L,ORF1b:S2338L,ORF7a:R118G,ORF8:Q277,ORF8:R52I,ORF8:C61F,ORF8:Y73C,ORF8:P971Q77K,SN501Y,S:A570D,S:D614G,S:P681H,S:T716I,S:T721S,S982A,S,D | 29                    | 0                       |                       |                         |
| hCoV-19/Mexico/NLE-IndRE_FB18090_S4118/2021 | Mexico         | EPI_ISL_2920689 | 2021 | B.1.1.7     | GRY            | 46                      | 2A,G28881A,G28882A,G28883C,C28977T                                                                                                                                                                                                                                             | N:D3L,N:R203K,N:G204R,N:S235F,ORF1a:P971L,ORF1a:T1001,ORF1a:T1542I,ORF1a:A1708D,ORF1a:I2230T,ORF1a:M2259I,ORF1a:D3222N,ORF1a:T4159I,ORF1b:P218L,ORF1b:P314L,ORF8:Q277,ORF8:P36G,ORF8:R52I,ORF8:C61F,ORF8:Y73C,SN501Y,S:A570D,S:D614G,S:P681H,S:T716I,S:S982A,S:D1118H,S:E1259H    | 6                     | 0                       |                       |                         |
| hCoV-19/Mexico/NLE-IndRE_FB18093_S4119/2021 | Mexico         | EPI_ISL_2920690 | 2021 | B.1.1.7     | GRY            | 44                      | G,28280C,A28281T,T28282A,T28688C,G28881A,G28882A,G28883C,C28977T                                                                                                                                                                                                               | N:D3L,N:R203K,N:G204R,N:S235F,ORF1a:P971L,ORF1a:T1001,ORF1a:T1542I,ORF1a:A1708D,ORF1a:I2230T,ORF1a:M2259I,ORF1a:D3222N,ORF1a:T4159I,ORF1b:P218L,ORF1b:P314L,ORF8:Q277,ORF8:P36G,ORF8:R52I,ORF8:C61F,ORF8:Y73C,SN501Y,S:A570D,S:D614G,S:P681H,S:T716I,S:S982A,S:D1118H,S:E1259H    | 6                     | 0                       |                       |                         |
| hCoV-19/Mexico/NLE-IndRE_FB18094_S4120/2021 | Mexico         | EPI_ISL_2920691 | 2021 | B.1.1.7     | GRY            | 43                      | G,28280C,A28281T,T28282A,T28688C,G28881A,G28882A,G28883C,C28977T                                                                                                                                                                                                               | N:D3L,N:R203K,N:G204R,N:S235F,ORF1a:P971L,ORF1a:T1001,ORF1a:T1542I,ORF1a:A1708D,ORF1a:I2230T,ORF1a:M2259I,ORF1a:D3222N,ORF1a:T4159I,ORF1b:P218L,ORF1b:P314L,ORF8:Q277,ORF8:P36G,ORF8:R52I,ORF8:C61F,ORF8:Y73C,SN501Y,S:A570D,S:D614G,S:P681H,S:T716I,S:S982A,S:D1118H,S:E1258D    | 6                     | 0                       |                       |                         |
| hCoV-19/Mexico/NLE-IndRE_FB18095_S4121/2021 | Mexico         | EPI_ISL_2920692 | 2021 | B.1.1.7     | GRY            | 42                      | 28075T,A28111G,G28280C,A28281T,T28282A,G28881A,G28882A,G28883C,C28977T                                                                                                                                                                                                         | N:D3L,N:P13T,N:R203K,N:G204R,N:S235F,ORF1a:P971L,ORF1a:T1001,ORF1a:T1542I,ORF1a:A1708D,ORF1a:I2230T,ORF1a:M2259I,ORF1a:P3162R,ORF1a:D3222N,ORF1b:P218L,ORF1b:P314L,ORF8:Q277,ORF8:R52I,ORF8:C61F,ORF8:Y73C,ORF8b:H9                                                               | 25                    | 0                       |                       |                         |
| hCoV-19/Mexico/NLE-IndRE_FB18317_S3969/2021 | Mexico         | EPI_ISL_2858983 | 2021 | B.1.1.7     | GRY            | 42                      | T,28280C,A28281T,T28282A,T28688C,G28881A,G28882A,G28883C,C28977T                                                                                                                                                                                                               | N:D3L,N:N8H,N:A152V,N:R203K,N:G204R,ORF1a:T1001,ORF1a:I2230T,ORF1b:P314L,ORF8:Q277,ORF8:R52I,ORF8:Y73C,ORF8b:K4N,SN501Y,S:A570D,S:D614G,S:P681H,S:T716I,S:S982A,S:D1118H                                                                                                          | 6                     | 0                       |                       |                         |
| hCoV-19/Mexico/NLE-LESPNL-2021040701/2021   | Mexico         | EPI_ISL_1911302 | 2021 | B.1.1.7     | O              | 37                      | 7972T,G28048T,A28111G,G28280C,A28281T,T28282A,A28295C,C28728T,G28881A,G28882A,G28883C,C28977T                                                                                                                                                                                  | N:D3L,N:N8D,N:R203K,N:G204R,N:S235F,ORF1a:T1001,ORF1a:I2230T,ORF1a:L3116F,ORF1b:P314L,ORF8:Q277,ORF8:R52I,ORF8:Y73C,ORF8b:K68*O,SN501Y,S:A570D,S:D614G,S:P681H,S:T716I,S:S982A                                                                                                    | 3                     | 940                     |                       |                         |
| hCoV-19/Mexico/NLE-LESPNL-20210512-417/2021 | Mexico         | EPI_ISL_2102612 | 2021 | B.1.576     | O              | 19                      | C3037T,C3267T,G28954C,G9445C,C9611T,C14408T,C14676T,T16176C,A17153G,C19554T,A23063T,C23271A,A23403G,C23709T,T24506G,G24914C,A25336G,G25337C,G25650T,C27972T                                                                                                                    | N:D3L,N:N8D,N:R203K,N:G204R,N:S235F,ORF1a:T1001,ORF1a:I2230T,ORF1a:L3116F,ORF1b:P314L,ORF8:Q277,ORF8:R52I,ORF8:Y73C,ORF8b:K68*O,SN501Y,S:A570D,S:D614G,S:P681H,S:T716I,S:S982A,S:D1118H                                                                                           | 1                     | 2643                    |                       |                         |
| hCoV-19/Mexico/NLE-LESPNL-20210512-431/2021 | Mexico         | EPI_ISL_2102626 | 2021 | B.1.1       | O              | 21                      | A,23403G,C23604A,C23709T,G24914C,C27972T,G28774T,G28881A,G28882A,G28883C,C28937T,C3267T,C5986T,G6954C,C9611T,C14408T,C14676T,T16176C,A23063T,C23271A,C23403G,C23709T,T24506G,G24914C,A25336G,G25337C,G25650T,C27972T                                                           | N:D3L,N:N8D,N:R203K,N:G204R,N:S235F,ORF1a:T1001,ORF1a:I2230T,ORF1a:L3116F,ORF1b:P314L,ORF8:Q277,ORF8:R52I,ORF8:Y73C,ORF8b:K68*O,SN501Y,S:A570D,S:D614G,S:P681H,S:T716I,S:S982A,S:D1118H                                                                                           | 0                     | 1728                    |                       |                         |
| hCoV-19/Mexico/NLE-LESPNL-20210512-433/2021 | Mexico         | EPI_ISL_2102628 | 2021 | B.1.1.7     | O              | 22                      | 9T,G24914C,C27972T,G28048T,A28111G,G28280C,A28281T,T28282A,A28295C,G28881A,G28882A,G28883C,C3037T,C3267T,G6954C,C8318T,C11497T,C11750T,C14408T,C14676T,T15096T,C16176C,G16975T,C23271A,A23403G,C23604A,C23709T,T24506G,C27972T,A28095T,A28111G,G28280C,A28281T,T28282A,C28977T | N:D3L,N:N8D,N:R203K,N:G204R,N:S235F,ORF1a:T1001,ORF1a:I2230T,ORF1a:L3116F,ORF1b:P314L,ORF8:Q277,ORF8:R52I,ORF8:Y73C,ORF8b:K68*O,SN501Y,S:A570D,S:D614G,S:P681H,S:T716I,S:S982A                                                                                                    | 3                     | 1835                    |                       |                         |
| hCoV-19/Mexico/NLE-LESPNL-20210512-435/2021 | Mexico         | EPI_ISL_2102630 | 2021 | B.1.1.7     | G              | 37                      | C3037T,C3267T,G28954C,G9445C,C9611T,C14408T,C14676T,T16176C,C21855T,C23271A,A23403G,C23604A,C23709T,T24506G,G24914C,C27972T,A28111G,G28280C,A28281T,T28282A,A28295C,G28881A,G28882A,G28883C,C28977T                                                                            | N:D3L,N:N8D,N:R203K,N:G204R,N:S235F,ORF1a:T1001,ORF1a:I2230T,ORF1a:L3116F,ORF1b:P314L,ORF8:Q277,ORF8:R52I,ORF8:Y73C,ORF8b:K68*O,SN501Y,S:A570D,S:D614G,S:P681H,S:T716I,S:S982A,S:D1118H                                                                                           | 18                    | 1899                    |                       |                         |
| hCoV-19/Mexico/NLE-LESPNL-20210512-439/2021 | Mexico         | EPI_ISL_2102633 | 2021 | B.1.1.7     | O              | 25                      | 5G,G28881A,G28882A,G28883C,C28977T                                                                                                                                                                                                                                             | N:D3L,N:R203K,N:G204R,N:S235F,ORF1a:T1001,ORF1b:P314L,ORF1b:M226I,ORF1b:P314L,ORF8:Q277,ORF8:R52I,ORF8:Y73C,ORF8b:K68*O,SN501Y,S:A570D,S:D614G,S:P681H,S:T716I,S:S982A,S:D1118H                                                                                                   | 0                     | 1899                    |                       |                         |
| hCoV-19/Mexico/NLE-LESPNL-20210512-453/2021 | Mexico         | EPI_ISL_2102645 | 2021 | B.1.1.7     | O              | 27                      | C,222T,C241T,C3037T,C3267T,C5986T,C14408T,C15279T,T16176C,G20274T,A23063T,C23271A,C23604A,C23709T,T24506G,G24914C,T25180C,C27972T,G28048T,A28095T,A28111G,G28280C,A28281T,T28282A,G28881A,G28882A,G28883C,C28977T                                                              | N:D3L,N:R203K,N:G204R,N:S235F,ORF1a:T1001,ORF1b:P314L,ORF1b:M226I,ORF1b:P314L,ORF8:Q277,ORF8:R52I,ORF8:Y73C,ORF8b:K68*O,SN501Y,S:A570D,S:D614G,S:P681H,S:T716I,S:S982A,S:D1118H                                                                                                   | 3                     | 2145                    |                       |                         |

|                                             |                 |         |     |                                                                                                                                                                                                                                                                                                                                                                                 |                                                                                                                                                                                                                                                 |    |                                                                                                                                                                                     |    |                           |   |   |
|---------------------------------------------|-----------------|---------|-----|---------------------------------------------------------------------------------------------------------------------------------------------------------------------------------------------------------------------------------------------------------------------------------------------------------------------------------------------------------------------------------|-------------------------------------------------------------------------------------------------------------------------------------------------------------------------------------------------------------------------------------------------|----|-------------------------------------------------------------------------------------------------------------------------------------------------------------------------------------|----|---------------------------|---|---|
| hCoV-19/Mexico/NLE-LESPNL-20210512-454/2021 | EPI_ISL_2102646 | B.1.576 | O   | 222T,C241T,C913T,C2110T,C3267T,C8127T,C14408T,C14676T,C15279T,T16176C,C17762T,G20274T,A23063T,C23271A,A23403G,C23604A,G24914C,C27972T,A28095T,A28111G,G28280C,A292T,C2156T,C3037T,C3267T,T6954C,C14408T,C14676T,C15279T,T16176C,T16563A,C16580T,G19101T,C23170T,C23271A,C23604A,G24914C,C25626T,C27972T,A28111G,G28280C,A28281T,T28282A,G28295C,G28881A,G28882A,G28883C,C28977T | N:D3L,ORF1a:T1001,ORF1a:A2621V,ORF1b:P314L,ORF1b:A1432V,ORF1b:M2                                                                                                                                                                                | 14 | 269I,ORF8:Q27*,ORF8:K68*,ORF8:Y73C,S:N501Y,S:A570D,S:D614G,S:P681H,S                                                                                                                | 1  | 2406                      |   |   |
| hCoV-19/Mexico/NLE-LESPNL-20210512-455/2021 | EPI_ISL_2102647 | B.1.1   | O   | 27 T17282A,G28295C,G28881A,G28882A,G28883C,C28977T                                                                                                                                                                                                                                                                                                                              | N:D3L,N:R203K,N:G204R,N:S235F,ORF1a:T1001,ORF1a:1230T,ORF1a:2230T,ORF1b:P314L,ORF1b:T10381,ORF1b:Q1878H,ORF8:Q27*,ORF8:Y73C,O                                                                                                                   | 5  | R29b:K4N,S:A570D,S:P681H,S:D1118H                                                                                                                                                   | 5  | 1547                      |   |   |
| hCoV-19/Mexico/NLE-LESPNL-20210512-458/2021 | EPI_ISL_2102650 | B.1.1.1 | O   | C913T,C3037T,C3267T,C5986T,T6954C,G8222A,T9445C,C14676T,C15279T,T16176C,C23063T,C23271A,C23709T,G24914C,C27972T,A28111G,G28295C,G28881A,G28882A,G28883C,C28977T                                                                                                                                                                                                                 | N:N8D,N:R203K,N:G204R,N:S235F,ORF1a:T1001,ORF1a:1230T,ORF1a:2230T,ORF1b:P314L,ORF1b:T10381,ORF1b:Q1878H,ORF8:Q27*,ORF8:Y73C,S:N501Y,S:A570D,S:D1118H                                                                                            | 3  | M:A69S,N:D3L,N:R203K,N:G204R,N:S235F,ORF1a:T1001,ORF1a:1230T,ORF1a:2230T,ORF1b:P314L,ORF1b:T10381,ORF1b:Q1878H,ORF8:Q27*,ORF8:Y73C,S:N501Y,S:A570D,S:D614G,S:P681H,S                | 1  | 2509                      |   |   |
| hCoV-19/Mexico/NLE-LESPNL-20210512-460/2021 | EPI_ISL_2102652 | B.1.1   | O   | 24 A,G28882A,G28883C,C28977T                                                                                                                                                                                                                                                                                                                                                    | N:D3L,N:R203K,N:G204R,N:S235F,ORF1a:T1001,ORF1a:A1708D,ORF1a:1230T,ORF1a:Q3966R,ORF1b:P314L,ORF1b:K1383R,ORF1b:K2557R,ORF8:Q27*,ORF8:R52I,ORF8:Y73C,S:N501Y,S:A570D,S:D614G,S:P681H,S,T716I,S                                                   | 15 | S5982A                                                                                                                                                                              | 1  | 2841                      |   |   |
| hCoV-19/Mexico/NLE-UANL-067/2021            | EPI_ISL_1789696 | B.1.1.7 | GRY | 28282A,C28603T,G28881A,G28882A,G28883C,A28967G,C28977T,G29711T                                                                                                                                                                                                                                                                                                                  | N:D3L,N:R203K,N:G204R,N:S235F,ORF1a:T1001,ORF1a:A1708D,ORF1a:1230T,ORF1a:Q3966R,ORF1b:P314L,ORF1b:K1383R,ORF1b:K2557R,ORF8:Q27*,ORF8:R52I,ORF8:Y73C,S:N501Y,S:A570D,S:D614G,S:P681H,S,T716I,S                                                   | 23 | 982A,S:D1118H,S:K1191N                                                                                                                                                              | 6  | 0                         |   |   |
| hCoV-19/Mexico/NLE-UANL-068/2021            | EPI_ISL_1789697 | B.1.1.7 | GRY | 38 28282A,G28881A,G28882A,G28883C,A28967G,C28977T,G29711T                                                                                                                                                                                                                                                                                                                       | N:D3L,N:R203K,N:G204R,N:S235F,ORF1a:T1001,ORF1a:A1708D,ORF1a:1230T,ORF1a:Q3966R,ORF1b:P314L,ORF1b:K1383R,ORF1b:K2557R,ORF8:Q27*,ORF8:R52I,ORF8:Y73C,S:N501Y,S:A570D,S:D614G,S:P681H,S,T716I,S                                                   | 23 | 982A,S:D1118H,S:K1191N                                                                                                                                                              | 6  | 0                         |   |   |
| hCoV-19/Mexico/NLE-UANL-075/2021            | EPI_ISL_1789699 | B.1.1.7 | GRY | 36 688C,G28881A,G28882A,G28883C,C28977T                                                                                                                                                                                                                                                                                                                                         | N:D3L,N:R203K,N:G204R,N:S235F,ORF1a:T1001,ORF1a:A1708D,ORF1a:1230T,ORF1a:M2259I,ORF1a:D322N,ORF1b:P218I,ORF1b:P314L,ORF8:Q27*,ORF8:R52I,ORF8:Y73C,S:N501Y,S:A570D,S:D614G,S:P681H,S,T716I,S                                                     | 23 | S:T716I,S:5982A,S:D1118H                                                                                                                                                            | 6  | 0                         |   |   |
| hCoV-19/Mexico/OAX-IndRE_FB13216_S1507/2021 | EPI_ISL_1805485 | B.1.1.7 | GRY | 35 G28882A,G28883C,C28977T,G29715T                                                                                                                                                                                                                                                                                                                                              | N:D3L,N:R203K,N:G204R,N:S235F,ORF1a:T1001,ORF1a:A1708D,ORF1a:1230T,ORF1b:P314L,ORF1b:A5398L,ORF1b:P314L,ORF8:Q27*,ORF8:R52I,ORF8:Y73C,S:N501Y,S:A570D,S:D614G,S:P681H,S,T716I,S                                                                 | 23 | 8D,S:D1259H                                                                                                                                                                         | 6  | 0                         |   |   |
| hCoV-19/Mexico/OAX-IndRE_FB13300_S1504/2021 | EPI_ISL_1805482 | B.1.1.7 | GRY | 34 6C,G27641T,C27972T,G28048T,A28111G,G28280C,A28281T,T28282A,G28881A,G28882A,G28883C,C241T,C913T,C3037T,C3267T,C5388A,C5986T,T6954C,C7299T,A13768T,C14408T,C14676T,T15096C,C15279T,T16176C,A23063T,C23271A,A23403G,C23604A,C23709T,T24506G,G24914C,G25217T,A25336C,G25337C,G26727T,C27972T,G28048T,A28111G,G28280C,A28281T,T28282A,G28881A,G28882A,G28883C,C28977T,G29715T     | N:D3L,N:R203K,N:G204R,N:S235F,ORF1a:T1001,ORF1a:A1708D,ORF1a:1230T,ORF1b:P314L,ORF1b:A5398L,ORF1b:P314L,ORF8:Q27*,ORF8:R52I,ORF8:Y73C,S:N501Y,S:A570D,S:D614G,S:P681H,S,T716I,S                                                                 | 21 | 1Y,S:A570D,S:D614G,S:P681H,S,T716I,S:5982A,S:D1118H,S,E1258D                                                                                                                        | 6  | 139                       |   |   |
| hCoV-19/Mexico/OAX-IndRE_FB14523_S2037/2021 | EPI_ISL_2283681 | B.1.1.7 | GRY | 35 8881A,G28882A,G28883C,C28977T                                                                                                                                                                                                                                                                                                                                                | N:D3L,N:R203K,N:G204R,N:S235F,ORF1a:T1001,ORF1a:A1708D,ORF1a:1230T,ORF1a:A2345V,ORF1b:M101L,ORF1b:P314L,ORF8:Q27*,ORF8:R52I,ORF8:Y73C,S:N501Y,S:A570D,S:D614G,S:P681H,S,T716I,S                                                                 | 21 | 8*,ORF8:Y73C,S:N501Y,S:A570D,S:D614G,S:P681H,S,T716I,S                                                                                                                              | 6  | 0                         |   |   |
| hCoV-19/Mexico/OAX-IndRE_FB14526_S2038/2021 | EPI_ISL_2283682 | B.1.1.7 | GRY | 33 727T,C27972T,G28048T,A28111G,G28280C,A28281T,T28282A,G28881A,G28882A,G28883C,C241T,C913T,C3037T,C3267T,C5388A,C5986T,T6954C,C7299T,A13768T,C14408T,C14676T,T15096C,C15279T,T16176C,A23063T,C23271A,A23403G,C23604A,C23709T,T24506G,G24914C,G25217T,A25336C,G25337C,G26727T,C27972T,G28048T,A28111G,G28280C,A28281T,T28282A,G28881A,G28882A,G28883C,C28977T,G29715T           | M:A69S,N:D3L,N:R203K,N:G204R,N:S235F,ORF1a:T1001,ORF1a:A1708D,ORF1a:1230T,ORF1b:P314L,ORF8:Q27*,ORF8:R52I,ORF8:Y73C,S:N501Y,S:A570D,S:D614G,S:P681H,S,T716I,S                                                                                   | 20 | S:D614G,S:P681H,S:T716I,S:5982A,S:D1118H,S:G1219C                                                                                                                                   | 6  | 4                         |   |   |
| hCoV-19/Mexico/OAX-IndRE_FB14528_S2039/2021 | EPI_ISL_2283683 | B.1.1.7 | GRY | 32 727T,C27972T,G28048T,A28111G,G28280C,A28281T,T28282A,G28881A,G28882A,G28883C,C241T,C913T,C3037T,C3267T,C5388A,C5986T,T6954C,C7299T,A13768T,C14408T,C14676T,T15096C,C15279T,T16176C,A23063T,C23271A,A23403G,C23604A,C23709T,T24506G,G24914C,G25217T,A25336C,G25337C,G26727T,C27972T,G28048T,A28111G,G28280C,A28281T,T28282A,G28881A,G28882A,G28883C,C28977T,G29715T           | M:A69S,N:D3L,N:R203K,N:G204R,N:S235F,ORF1a:T1001,ORF1a:A1708D,ORF1a:1230T,ORF1b:P314L,ORF8:Q27*,ORF8:R52I,ORF8:Y73C,S:N501Y,S:A570D,S:D614G,S:P681H,S,T716I,S                                                                                   | 20 | S:D614G,S:P681H,S:T716I,S:5982A,S:D1118H,S:G1219C                                                                                                                                   | 6  | 0                         |   |   |
| hCoV-19/Mexico/OAX-IndRE_FB14529_S2040/2021 | EPI_ISL_2283684 | B.1.1.7 | GRY | 30 8111G,G28280C,A28281T,T28282A,G28881A,G28882A,G28883C,C28977T,G29715T                                                                                                                                                                                                                                                                                                        | N:D3L,N:R203K,N:G204R,N:S235F,ORF1a:T1001,ORF1a:A1708D,ORF1a:1230T,ORF1b:P314L,ORF8:Q27*,ORF8:R52I,ORF8:Y73C,S:N501Y,S:A570D,S:D614G,S:P681H,S,T716I,S                                                                                          | 18 | S:P681H,S:T716I,S:5982A,S:D1118H                                                                                                                                                    | 6  | 180                       |   |   |
| hCoV-19/Mexico/OAX-IndRE_FB14532_S2042/2021 | EPI_ISL_2283685 | B.1.1.7 | GRY | 40 241T,C913T,C3037T,C3267T,C5388A,G5924T,C5986T,T6954C,A8848G,C14408T,C14676T,C15279T,T16176C,C18568T,G19656T,C19862T,G21255C,A23063T,C23271A,A23403G,C23604A,C23709T,T24506G,G24914C,G25217T,G26428T,G26727T,C27972T,G28048T,A28111G,G28280C,A28877T,G28878C,G28881A,G28882A,G28883C,C28977T,G29392C,A29491G                                                                  | N:D3L,N:R203K,N:G204R,N:S235F,ORF1a:T1001,ORF1a:A1708D,ORF1a:1230T,ORF1a:A2345V,ORF1b:M101L,ORF1b:P314L,ORF8:Q27*,ORF8:R52I,ORF8:Y73C,S:N501Y,S:A570D,S:D614G,S:P681H,S,T716I,S                                                                 | 25 | 4G,S:P681H,S:T716I,S:5982A,S:D1118H,S:V1228L                                                                                                                                        | 6  | 10                        |   |   |
| hCoV-19/Mexico/OAX-IndRE_FB14970_S2052/2021 | EPI_ISL_2283694 | B.1.1.7 | GRY | 39 80C,A28281T,T28282A,G28881A,G28882A,G28883C,C28977T,G29715T                                                                                                                                                                                                                                                                                                                  | E:V62F,M:A69S,N:D3L,N:R203K,N:G204R,N:S235F,ORF1a:T1001,ORF1a:A1708D,ORF1a:1230T,ORF1b:P314L,ORF1b:V1887F,ORF1a:1230T,ORF1b:P314L,ORF1b:1701F,ORF1b:K2063N,ORF1b:A2132V,ORF8:Q27*,ORF8:R52I,ORF8:Y73C,S:N501Y,S:A570D,S:D614G,S:P681H,S,T716I,S | 25 | 82A,S:D1118H,S:E1258D,S:D1259H                                                                                                                                                      | 6  | 6                         |   |   |
| hCoV-19/Mexico/OAX-IndRE_FB15918_S2397/2021 | EPI_ISL_2455922 | B.1.1.7 | GRY | 42 2T,G28048T,A28111G,G28280C,A28281T,T28282A,G28881A,G28882A,G28883C,C28977T,G29715T                                                                                                                                                                                                                                                                                           | N:D3L,N:R203K,N:G204R,N:S235F,ORF1a:T1001,ORF1a:A1708D,ORF1a:1230T,ORF1a:A2345V,ORF1b:M101L,ORF1b:P314L,ORF1b:A2132V,ORF6:W27L,ORF8:Q27*,ORF8:R52I,ORF8:K68*,ORF8:Y73C,S:N501Y,S:A570D,S:D614G,S:P681H,S,T716I,S                                | 23 | H,S:T716I,S:5982A,S:D1118H                                                                                                                                                          | 6  | 0                         |   |   |
| hCoV-19/Mexico/OAX-IndRE_FB17118_S3085/2021 | EPI_ISL_2663352 | B.1.1.7 | GRY | 36 8881A,G28882A,G28883C,C28977T,A29491G                                                                                                                                                                                                                                                                                                                                        | N:D3L,N:R203K,N:G204R,N:S235F,ORF1a:T1001,ORF1a:N1076S,ORF1a:A1708D,ORF1a:1230T,ORF1a:R4387S,ORF1b:P314L,ORF8:Q27*,ORF8:R52I,ORF8:Y73C,S:P26H,S:N501Y,S:A570D,S:D614G,S:5654A,S:P681H,S:T716I,S                                                 | 25 | S:A570D,S:D614G,S:P681H,S:T716I,S:5982A,S:D1118H,S:5982A,S:D1118H                                                                                                                   | 6  | 0                         |   |   |
| hCoV-19/Mexico/OAX-IndRE_FB18623_S4153/2021 | EPI_ISL_2920724 | B.1.1.7 | GRY | 40 111G,G28280C,A28281T,T28282A,G28881A,G28882A,G28883C,C28977T,C29732T                                                                                                                                                                                                                                                                                                         | N:D3L,N:R203K,N:G204R,N:S235F,ORF1a:T1001,ORF1a:A1708D,ORF1a:1230T,ORF1a:M2259I,ORF1a:T4355I,ORF1b:P314L,ORF8:Q27*,ORF8:R52I,ORF8:Y73C,S:N501Y,S:A570D,S:D614G,S:P681H,S,T716I,S                                                                | 21 | R5I,S:5982A,S:D1118H                                                                                                                                                                | 6  | 0                         |   |   |
| hCoV-19/Mexico/PUE-IndRE_FB16502_S2472/2021 | EPI_ISL_2455993 | B.1.1.7 | GRY | 36 2A,G28881A,G28882A,G28883C,C28977T                                                                                                                                                                                                                                                                                                                                           | N:D3L,N:R203K,N:G204R,N:S235F,ORF1a:T1001,ORF1a:A1708D,ORF1a:1230T,ORF1a:M2259I,ORF1a:T4355I,ORF1b:P314L,ORF8:Q27*,ORF8:R52I,ORF8:Y73C,S:N501Y,S:A570D,S:D614G,S:P681H,S,T716I,S                                                                | 21 | M:A69S,N:R203K,N:G204R,N:S235F,ORF1a:T1001,ORF1a:A1708D,ORF1a:1230T,ORF1a:Q3966R,ORF1b:P314L,ORF1b:V1649F,ORF8:Q27*,ORF8:R52I,ORF8:K68*,ORF8:Y73C,S:N501Y,S:A570D,S:D614G,S:P681H,S | 17 | S,T716I,S:D1118H,S:G1219C | 3 | 0 |
| hCoV-19/Mexico/PUE-IndRE_FB16507_S2473/2021 | EPI_ISL_2455994 | B.1.1.7 | GRY | 38 0C,A28281T,T28282A,G28881A,G28882A,G28883C,C28977T                                                                                                                                                                                                                                                                                                                           | N:D3L,N:R203K,N:G204R,N:S235F,ORF1a:T1001,ORF1a:A1708D,ORF1a:1230T,ORF1a:M2259I,ORF1a:T4355I,ORF1b:P314L,ORF8:Q27*,ORF8:R52I,ORF8:Y73C,S:N501Y,S:A570D,S:D614G,S:P681H,S,T716I,S                                                                | 23 | S:T716I,S:5982A,S:D1118H                                                                                                                                                            | 6  | 46                        |   |   |
| hCoV-19/Mexico/PUE-IndRE_FB17005_S3132/2021 | EPI_ISL_2663399 | B.1.1.7 | GRY | 37 881A,G2882A,G2883C,G2884C,C28977T,G29162T                                                                                                                                                                                                                                                                                                                                    | N:D3L,N:R203K,N:G204R,N:S235F,ORF1a:T1001,ORF1a:A1708D,ORF1a:1230T,ORF1a:M2259I,ORF1a:T4355I,ORF1b:P314L,ORF8:Q27*,ORF8:R52I,ORF8:Y73C,S:N501Y,S:A570D,S:D614G,S:P681H,S                                                                        | 21 | M:A69S,N:R203K,N:G204R,N:S235F,ORF1a:T1001,ORF1a:A1708D,ORF1a:1230T,ORF1a:Q3966R,ORF1b:P314L,ORF1b:V1649F,ORF8:Q27*,ORF8:R52I,ORF8:K68*,ORF8:Y73C,S:N501Y,S:A570D,S:D614G,S:P681H,S | 17 | S,T716I,S:D1118H,S:G1219C | 3 | 0 |
| hCoV-19/Mexico/PUE-IndRE_FB17749_S3520/2021 | EPI_ISL_2779035 | B.1.1.7 | GRY | 25 28882A,G28883C,C28977T,G29715T                                                                                                                                                                                                                                                                                                                                               | N:D3L,N:R203K,N:G204R,N:S235F,ORF1a:T1001,ORF1a:A1708D,ORF1a:1230T,ORF1a:M2259I,ORF1a:T4355I,ORF1b:P314L,ORF8:Q27*,ORF8:R52I,ORF8:Y73C,S:N501Y,S:A570D,S:D614G,S:P681H,S                                                                        | 17 | S,T716I,S:D1118H,S:G1219C                                                                                                                                                           | 3  | 0                         |   |   |

|                                             |                 |         |     |                                                                                                                                                                                                                                                                                                                                                                                                                                                                                                                                                                        |  |  |                                                                                                                                                                                                                                                                 |   |    |
|---------------------------------------------|-----------------|---------|-----|------------------------------------------------------------------------------------------------------------------------------------------------------------------------------------------------------------------------------------------------------------------------------------------------------------------------------------------------------------------------------------------------------------------------------------------------------------------------------------------------------------------------------------------------------------------------|--|--|-----------------------------------------------------------------------------------------------------------------------------------------------------------------------------------------------------------------------------------------------------------------|---|----|
|                                             |                 |         |     | C241T,C913T,C2449T,C3037T,C3267T,C5388A,C5944T,C5986T,C6402T,T6954C,C9166T,A10323<br>G,C14408T,C14676T,T15096C,C15279T,T16176C,A23063T,C23271A,A23403G,C23604A,C23709<br>T,T24506G,G24914C,C27972T,G28048T,T28053C,A28095T,A28111G,G28280C,A28281T,T2828<br>2A,G28881A,G28882A,G28883C,G28884C,C28977T,T29710C,G29759T                                                                                                                                                                                                                                                 |  |  | N:D3L:N:R203K,N:G204P,N:S235F,ORF1a:T1001,ORF1a:A1708D,ORF1a:P204<br>6L,ORF1a:I2230T,ORF1a:K3353R,ORF1b:P314L,ORF8:Q27*,ORF8:R52I,ORF8:S<br>54P,ORF8:K68*,ORF8:Y73C,S:N501Y,SA570D,S:D614G,SP681H,S:T716I,S5982A,S:D1118H                                       | 6 | 0  |
| hCoV-19/Mexico/PUE-InDRE_FB17750_S3521/2021 | EPI_ISL_2779036 | B.1.1.7 | GRY | C241T,C913T,C3037T,C3267T,C4331T,C5388A,C5986T,T6954C,C14408T,C14676T,T15096C,C15<br>2797T,T16176C,C19164T,A23063T,C23271A,A23403G,C23604A,C23709T,T24506G,G24<br>914C,C25096T,G27459T,C27972T,G28048T,A28095T,A28111G,G28280C,A28281T,T28282A,G2<br>8881A,G28882A,G28883C,C28977T                                                                                                                                                                                                                                                                                     |  |  | N:D3L:N:R203K,N:G204R,N:A211S,N:S235F,ORF1a:T1001,ORF1a:A1708D,ORF1a:I2230<br>T,ORF1b:P314L,ORF8a:E22D,ORF8:Q27*,ORF8:R52I,ORF8:K68*,ORF8:Y73C,S:N<br>501Y,SA570D,S:D614G,SP681H,S:T716I,S5982A,S:D1118H                                                        | 6 | 0  |
| hCoV-19/Mexico/PUE-InDRE_FB17754_S3522/2021 | EPI_ISL_2779037 | B.1.1.7 | GRY | T201A,C241T,C913T,C2110T,C3037T,C3267T,C5388A,C5986T,T6954C,G7042T,A10195G,C13329<br>T,C14120T,C14408T,C14676T,C15279T,T16176C,A23063T,C23271A,A23403G,C23604A,C23709<br>T,T24506G,G24914C,T25612G,C27972T,G28048T,G28075T,A28095T,A28111G,G28280C,A2828<br>1T,T28282A,G28881A,G28882A,G28883C,G28904T,C28977T                                                                                                                                                                                                                                                         |  |  | N:D3L:N:R203K,N:G204R,N:A211S,N:S235F,ORF1a:T1001,ORF1a:A1708D,ORF1a:I2230T,ORF1a:M2259I,ORF1a:T4355I,ORF1b:P218L,ORF1b:P314L,ORF3a:574A,ORF8:Q27*,ORF8:R52I,ORF8:C61F,ORF8:K68*,ORF8:Y73C,S:N501Y,SA570D,S:D614G,SP681H,S:T716I,S5982A,S:D1118H                | 6 | 0  |
| hCoV-19/Mexico/PUE-InDRE_FB17755_S3523/2021 | EPI_ISL_2779038 | B.1.1.7 | GRY | T201A,C241T,C913T,C2110T,C3037T,C3267T,C5388A,C5986T,T6954C,G7042T,A10195G,C13329<br>T,C14120T,C14408T,C14676T,C15279T,T16176C,A23063T,C23271A,A23403G,C23604A,C23709<br>T,T24506G,G24914C,T25612G,C27972T,G28048T,G28075T,A28095T,A28111G,G28280C,A2828<br>1T,T28282A,G28881A,G28882A,G28883C,G28904T,C28977T                                                                                                                                                                                                                                                         |  |  | N:D3L:N:R203K,N:G204R,N:A211S,N:S235F,ORF1a:T1001,ORF1a:A1708D,ORF1a:I2230T,ORF1a:M2259I,ORF1a:T4355I,ORF1b:P218L,ORF1b:P314L,ORF3a:574A,ORF8:Q27*,ORF8:R52I,ORF8:C61F,ORF8:K68*,ORF8:Y73C,S:N501Y,SA570D,S:D614G,SP681H,S:T716I,S5982A,S:D1118H                | 6 | 0  |
| hCoV-19/Mexico/PUE-InDRE_FB17756_S3524/2021 | EPI_ISL_2779039 | B.1.1.7 | GRY | C241T,C913T,C3037T,C3267T,C5388A,C5986T,C6196T,T6954C,A8848G,C14408T,C14676<br>T,C15279T,T16176C,A23063T,C23271A,T2332C,A23403G,C23604A,C23709T,T24506G,G24914<br>C,G25217T,G25538A,G26727T,C27972T,G28048T,A28111G,G28280C,A28281T,T28282A,G2888<br>8A,G28882A,G28883C,C28977T,G29715T                                                                                                                                                                                                                                                                                |  |  | M:A69S,N:D3L:N:R203K,N:G204R,N:S235F,ORF1a:R43C,ORF1a:T1001,ORF1a:A1708D,ORF1a:I2230T,ORF1b:P314L,ORF8:Q27*,ORF8:R52I,ORF8:Y73C,S:N501Y,SA570D,S:D614G,SP681H,S:T716I,S5982A,S:D1118H,S:G12<br>22 19C                                                           | 6 | 0  |
| hCoV-19/Mexico/PUE-InDRE_FB17764_S3525/2021 | EPI_ISL_2779040 | B.1.1.7 | GRY | T201A,C241T,C913T,C2110T,C3037T,C3267T,C5388A,C5986T,T6954C,G7042T,A10195G,C13329<br>T,C14120T,C14408T,C14676T,C15279T,T16176C,A23063T,C23271A,A23403G,C23604A,C23709<br>T,A23709T,T24506G,G24914C,T25612G,C27972T,G28048T,G28075T,A28095T,A28111G,G2828<br>0C,A28281T,T28282A,G28881A,G28882A,G28883C,C28977T                                                                                                                                                                                                                                                         |  |  | N:D3L:N:R203K,N:G204R,N:A211S,N:S235F,ORF1a:T1001,ORF1a:A1708D,ORF1a:I2230<br>T,ORF1a:M2259I,ORF1a:T4355I,ORF1b:P218L,ORF1b:P314L,ORF3a:574A,ORF8:<br>Q27*,ORF8:R52I,ORF8:C61F,ORF8:K68*,ORF8:Y73C,S:N501Y,SA570D,S:D61<br>24 4G,SP681H,S:T716I,S5982A,S:D1118H | 6 | 0  |
| hCoV-19/Mexico/PUE-InDRE_FB17766_S3526/2021 | EPI_ISL_2779041 | B.1.1.7 | GRY | T201A,C241T,C913T,C2110T,C3037T,C3267T,C5388A,C5986T,T6954C,G7042T,A10195G,C13329<br>T,C14120T,C14408T,C14676T,C15279T,T16176C,A23063T,C23271A,A23403G,C23604A,C23709<br>T,T24506G,G24914C,T25612G,C27972T,G28048T,G28075T,A28095T,A28111G,G28280C,A2828<br>1T,T28282A,G28881A,G28882A,G28883C,G28904T,C28977T                                                                                                                                                                                                                                                         |  |  | N:D3L:N:R203K,N:G204R,N:A211S,N:S235F,ORF1a:T1001,ORF1a:A1708D,ORF1a:I2230T,ORF1a:M2259I,ORF1a:T4355I,ORF1b:P218L,ORF1b:P314L,ORF3a:574A,ORF8:Q27*,ORF8:R52I,ORF8:C61F,ORF8:K68*,ORF8:Y73C,S:N501Y,SA570D,S:D614G,SP681H,S:T716I,S5982A,S:D1118H                | 6 | 0  |
| hCoV-19/Mexico/PUE-InDRE_FB17767_S3527/2021 | EPI_ISL_2779042 | B.1.1.7 | GRY | C241T,C913T,C3037T,C3267T,C5388A,C5526T,C5986T,C6196T,T6954C,A8848G,C10138T,C1235<br>7T,C14408T,C14676T,C15279T,T16176C,C21618G,C21727T,A23063T,C23114T,C23271A,A2340<br>3G,C23604A,C23709T,T24506G,G24914C,C27972T,G28048T,A28111G,G28881T,C28977T,G297<br>C241T,C913T,C2453T,C3037T,C3267T,C5388A,C5986T,T6954C,C9611T,C14408T,C14676T,C152<br>79T,T16176C,C16616T,C21855T,G21974C,A23063T,C23271A,A23403G,C23604A,C23709T,T245<br>06G,G24914C,C25609T,C27972T,G28048T,A28111G,G28280C,A28281T,T28282A,A28295G,G2<br>8881A,G28882A,G28883C,C28977T                   |  |  | N:R203M,N:S235F,ORF1a:T1001,ORF1a:A1708D,ORF1a:I2230T,ORF1a:R43C,ORF1a:T1001,ORF1a:A1708D,ORF1a:I2230T,ORF1a:M2259I,ORF1a:T4355I,ORF1b:P218L,ORF1b:P314L,ORF3a:574A,ORF8:Q27*,ORF8:R52I,ORF8:Y73C,S:N501Y,SA570D,S:D614G,SP681H,S:T716I,S5982A,S:D1118H         | 6 | 0  |
| hCoV-19/Mexico/PUE-InDRE_FB19607_S4512/2021 | EPI_ISL_3033365 | B.1.1.7 | G   | C241T,C913T,C3037T,C3267T,C5388A,C5526T,C5986T,C6196T,T6954C,A8848G,C10138T,C1235<br>7T,C14408T,C14676T,C15279T,T16176C,C21618G,C21727T,A23063T,C23114T,C23271A,A2340<br>3G,C23604A,C23709T,T24506G,G24914C,C27972T,G28048T,A28111G,G28881T,C28977T,G297<br>C241T,C913T,C2453T,C3037T,C3267T,C5388A,C5986T,T6954C,C9611T,C14408T,C14676T,C152<br>79T,T16176C,C16616T,C21855T,G21974C,A23063T,C23271A,A23403G,C23604A,C23709T,T245<br>06G,G24914C,C25609T,C27972T,G28048T,A28111G,G28280C,A28281T,T28282A,A28295G,G2<br>8881A,G28882A,G28883C,C28977T                   |  |  | C:S:T19R,S:N501Y,SA570D,S:D614G,SP681H,S:T716I,S5982A,S:D1118H                                                                                                                                                                                                  | 6 | 0  |
| hCoV-19/Mexico/PUE-InDRE_FB19622_S4513/2021 | EPI_ISL_3033366 | B.1.1.7 | GRY | C241T,C913T,C3037T,C3267T,C5388A,C5526T,C5986T,C6196T,T6954C,A8848G,C10138T,C1235<br>7T,C14408T,C14676T,C15279T,T16176C,C21618G,C21727T,A23063T,C23114T,C23271A,A2340<br>3G,C23604A,C23709T,T24506G,G24914C,C27972T,G28048T,A28111G,G28881T,C28977T,G297<br>C241T,C913T,C2453T,C3037T,C3267T,C5388A,C5986T,T6954C,C9611T,C14408T,C14676T,C152<br>79T,T16176C,C16616T,C21855T,G21974C,A23063T,C23271A,A23403G,C23604A,C23709T,T245<br>06G,G24914C,C25609T,C27972T,G28048T,A28111G,G28280C,A28281T,T28282A,A28295G,G2<br>8881A,G28882A,G28883C,C28977T                   |  |  | N:D3L:N:R203K,N:G204R,N:S235F,ORF1a:T1001,ORF1a:A1708D,ORF1a:I2230T,ORF1a:M2259I,ORF1a:T4355I,ORF1b:P218L,ORF1b:P314L,ORF3a:574A,ORF8:Q27*,ORF8:R52I,ORF8:C61F,ORF8:K68*,ORF8:Y73C,S:N501Y,SA570D,S:D614G,SP681H,S:T716I,S5982A,S:D1118H                        | 6 | 0  |
| hCoV-19/Mexico/PUE-InDRE_FB19629_S4514/2021 | EPI_ISL_3033367 | B.1.1.7 | GRY | C4C,C27972T,G28048T,A28111G,G28280C,A28281T,T28282A,G28881A,G28882A,G28883C,C28<br>C241T,C913T,C3037T,C3267T,C5388A,C5526T,C5986T,C6196T,T6954C,A8848G,C10138T,C1235<br>7T,C14408T,C14676T,C15279T,T16176C,C21727T,A23063T,C23114T,C23271A,A23403G,C2360<br>4A,C23709T,T24506G,G24914C,C27972T,G28048T,A28111G,G28280C,A28281T,T28282A,G288<br>8A,G28882A,G28883C,C28977T                                                                                                                                                                                              |  |  | N:D3L:N:R203K,N:G204R,N:A211S,N:S235F,ORF1a:T1001,ORF1a:A1708D,ORF1a:I2230T,ORF1a:M2259I,ORF1a:T4355I,ORF1b:P218L,ORF1b:P314L,ORF3a:574A,ORF8:Q27*,ORF8:R52I,ORF8:C61F,ORF8:K68*,ORF8:Y73C,S:N501Y,SA570D,S:D614G,SP681H,S:T716I,S5982A,S:D1118H                | 6 | 0  |
| hCoV-19/Mexico/PUE-InDRE_FB19630_S4515/2021 | EPI_ISL_3033368 | B.1.1.7 | GRY | 81A,G28882A,G28883C,C28977T                                                                                                                                                                                                                                                                                                                                                                                                                                                                                                                                            |  |  | N:D3L:N:R203K,N:G204R,N:S235F,ORF1a:T1001,ORF1a:A1708D,ORF1a:I2230T,ORF1a:M2259I,ORF1a:T4355I,ORF1b:P218L,ORF1b:P314L,ORF3a:574A,ORF8:Q27*,ORF8:R52I,ORF8:Y73C,S:N501Y,SA570D,S:D614G,SP681H,S:T716I,S5982A,S:D1118H                                            | 6 | 0  |
| hCoV-19/Mexico/PUE-InDRE_FB11371_S903/2021  | EPI_ISL_1423513 | B.1.1.7 | GRY | C241T,C913T,C3037T,C3267T,C5388A,C5986T,T6954C,G7393T,G8525A,G8600T,C1440<br>8T,C14676T,C15279T,T16176C,C17007C,A17615G,G22484T,A23063T,C23271A,A23403G,C2360<br>4A,C23709T,C24026T,C4378T,T24506G,G24914C,C25587T,C25624T,C27972T,G28048T,A2811<br>1G,G28280C,A28281T,T28282A,G28881A,G28882A,G28883C,C28977T,G29648T                                                                                                                                                                                                                                                 |  |  | N:D3L:N:R203K,N:G204R,N:S235F,ORF1a:T1001,ORF1a:E1024D,ORF1a:A1708D,ORF1a:I2230T,ORF1a:V2754I,ORF1a:V2779L,ORF1b:P314L,ORF1b:K1383R,ORF3a:H78Y,ORF8:Q27*,ORF8:R52I,ORF8:Y73C,S:V308L,S:N501Y,SA570D,S:D614G,SP681H,S:T716I,S5982A,S:D1118H                      | 6 | 0  |
| hCoV-19/Mexico/QUE-InDRE_FB12849_S1487/2021 | EPI_ISL_1805465 | B.1.1.7 | GRY | C241T,C913T,C3037T,C3267T,C5388A,C5986T,C6026T,T6954C,C11750T,C14408T,C14676T,C15<br>2797T,T16176C,C18647T,A23063T,C23271A,A23403G,C23604A,C23709T,T24506G,G24914C,C2<br>7972T,G28048T,A28111G,G28280C,A28281T,T28282A,G28881A,G28882A,G28883C,C28977T,C<br>C241T,C913T,C3037T,C3267T,C5388A,C5986T,G6647A,T6954C,C14408T,C14676T,T15096C,C15<br>2797T,T16176C,C17676T,C18183T,C19524T,A21519C,A23063T,C23271A,A23403G,C23604A,C23<br>709T,A24070T,T24506G,G24914C,C25624T,C27972T,G28048T,A28111G,G28280C,A28281T,T2<br>8282A,G28881A,G28882A,G28883C,C28977T,G29742T |  |  | N:D3L:N:R203K,N:G204R,N:S235F,ORF1a:T1001,ORF1a:A1708D,ORF1a:I2230T,ORF1a:M2259I,ORF1a:T4355I,ORF1b:P218L,ORF1b:P314L,ORF3a:574A,ORF8:Q27*,ORF8:R52I,ORF8:Y73C,S:N501Y,SA570D,S:D614G,SP681H,S:T716I,S5982A,S:D1118H                                            | 6 | 11 |
| hCoV-19/Mexico/QUE-InDRE_FB14548_S2468/2021 | EPI_ISL_2455989 | B.1.1.7 | GRY | C241T,C913T,C3037T,C3267T,C5388A,C5986T,G6647A,T6954C,C14408T,C14676T,T15096C,C15<br>2797T,T16176C,C17676T,C18183T,C19524T,A21519C,A23063T,C23271A,A23403G,C23604A,C23<br>709T,A24070T,T24506G,G24914C,C25624T,C27972T,G28048T,A28111G,G28280C,A28281T,T2<br>8282A,G28881A,G28882A,G28883C,C28977T,G29742T                                                                                                                                                                                                                                                             |  |  | N:D3L:N:R203K,N:G204P,N:S235F,ORF1a:T1001,ORF1a:A1708D,ORF1a:A212<br>8T,ORF1a:I2230T,ORF1b:P314L,ORF1b:R2684S,ORF3a:H78Y,ORF8:Q27*,ORF8:<br>R52I,ORF8:Y73C,S:N501Y,SA570D,S:D614G,SP681H,S:T716I,S5982A,S:D1118H                                                | 6 | 0  |
| hCoV-19/Mexico/QUE-InDRE_FB14550_S2080/2021 | EPI_ISL_2283720 | B.1.1.7 | GRY | 8282A,G28881A,G28882A,G28883C,C28977T,G29742T                                                                                                                                                                                                                                                                                                                                                                                                                                                                                                                          |  |  | A:S,D1118H                                                                                                                                                                                                                                                      | 6 | 0  |
| hCoV-19/Mexico/QUE-InDRE_FB15517_S2371/2021 | EPI_ISL_2455896 | Q.3     | GRY | C241T,C913T,C3037T,C3267T,C5388A,C5986T,C6568T,T6954C,A9529G,G10396T,C144<br>08T,C14676T,C15279T,T16176C,A17615G,T19301C,A19302T,G20962A,G22094C,A23063T,C232<br>71A,A23403G,C23604A,C23709T,T24506G,G24914C,A25336C,G26730C,C27972T,G28048T,A28<br>11G,G28280C,A28281T,T28282A,G28881A,G28882A,G28883C,C28977T                                                                                                                                                                                                                                                        |  |  | M:V70L,N:D3L:N:R203K,N:G204R,N:S235F,ORF1a:T1001,ORF1a:M1586I,ORF1a:I2230T,ORF1b:P314L,ORF1b:K1383R,ORF1b:P1945A,ORF1b:D2499N,ORF8:Q27*,ORF8:R52I,ORF8:Y73C,S:D1738F,S:N501Y,SA570D,S:D614G,SP681H,S:T716I,S5982A,S:D1118H,S:E1258D                             | 6 | 27 |
| hCoV-19/Mexico/QUE-InDRE_FB15562_S2372/2021 | EPI_ISL_2455897 | B.1.1.7 | GRY | C241T,C913T,C3037T,C3267T,C5388A,C5986T,T6954C,C9611T,C14408T,C14676T,C152<br>79T,T16176C,C21855T,A23063T,C23271A,A23403G,C23604A,C23709T,T24506G,G24914C,A25<br>336C,C27972T,G28048T,A28111G,G28280C,A28281T,T28282A,G28881A,G28882A,G28883C,C28<br>C241T,C913T,C3037T,C3267T,C5388A,C5986T,T6954C,C14408T,C14676T,C15279T,T16<br>176C,C21639A,A23063T,C23271A,A23403G,C23604A,C23709T,C4374T,T24506G,G24914C,G2<br>5164T,A25336C,C26801T,C27972T,G28048T,A28111G,G28280C,A28281T,T28282A,G28881A,G<br>28882A,G28883C,C28977T,C29754T                                 |  |  | N:D3L:N:R203K,N:G204P,N:S235F,ORF1a:T1001,ORF1a:A1708D,ORF1a:A212<br>8T,ORF1a:I2230T,ORF1b:P314L,ORF1b:R2684S,ORF3a:H78Y,ORF8:Q27*,ORF8:<br>R52I,ORF8:Y73C,S:N501Y,SA570D,S:D614G,SP681H,S:T716I,S5982A,S:D1118H,S:Q1201                                        | 6 | 10 |
| hCoV-19/Mexico/QUE-InDRE_FB15604_S2373/2021 | EPI_ISL_2455898 | B.1.1.7 | GRY | C241T,C913T,C3037T,C3267T,C5388A,C5986T,C6196T,T6954C,A8848G,C9803T,T11135C,C1440<br>8T,C14676T,C15279T,T16176C,A23063T,C23114T,C23271A,A23403G,C23604A,C23709T,G249<br>5T,T24506G,G24914C,A25336C,C27972T,G28048T,A28111G,G28280C,A28281T,T28282A,G288<br>8A,G28882A,G28883C,C28977T,G29715T,C29754T                                                                                                                                                                                                                                                                  |  |  | N:D3L:N:R203K,N:G204R,N:S235F,ORF1a:T1001,ORF1a:A1708D,ORF1a:I2230T,ORF1a:P3624I,ORF1b:P314L,ORF8:Q27*,ORF8:R52I,ORF8:Y73C,S:N501Y,SA570D,S:D614G,SP681H,S:T716I,S5982A,S:D1118H,S:E1258D                                                                       | 6 | 0  |
| hCoV-19/Mexico/QUE-InDRE_FB15641_S2374/2021 | EPI_ISL_2455899 | B.1.1.7 | GRY | C241T,C913T,C2102T,C3037T,C3267T,C5388A,C5986T,G6647A,T6954C,C12789T,C14408T,C146<br>76T,T15096C,C15279T,T16176C,C17676T,C18183T,C19524T,A21519C,A23063T,C23271A,A234<br>03G,C23604A,C23709T,A24070T,T24506G,G24914C,A25336C,C25624T,C27972T,G28048T,A28<br>11G,G28280C,A28281T,T28282A,G28881A,G28882A,G28883C,C28977T,G29742T                                                                                                                                                                                                                                        |  |  | N:D3L:N:R203K,N:G204P,N:S235F,ORF1a:T1001,ORF1a:A1708D,ORF1a:I2230T,ORF1a:P3624I,ORF1b:P314L,ORF8:Q27*,ORF8:R52I,ORF8:Y73C,S:N501Y,SA570D,S:D614G,SP681H,S:T716I,S5982A,S:D1118H,S:E1258D                                                                       | 6 | 0  |
| hCoV-19/Mexico/QUE-InDRE_FB15653_S2375/2021 | EPI_ISL_2455900 | B.1.1.7 | GRY |                                                                                                                                                                                                                                                                                                                                                                                                                                                                                                                                                                        |  |  | Q836H,S5982A,S:D1118H,S:E1258D                                                                                                                                                                                                                                  | 6 | 0  |



|                                             |                 |         |     |    |                                                                                                                                                                                                                                                                                                                                                                            |                                                                                                                                                                                                                                                            |   |    |
|---------------------------------------------|-----------------|---------|-----|----|----------------------------------------------------------------------------------------------------------------------------------------------------------------------------------------------------------------------------------------------------------------------------------------------------------------------------------------------------------------------------|------------------------------------------------------------------------------------------------------------------------------------------------------------------------------------------------------------------------------------------------------------|---|----|
| hCoV-19/Mexico/QUE-IndRE_FB15659_S2376/2021 | EPI_ISL_2455901 | B.1.1.7 | GRY | 34 | C241T,C913T,C2453T,C3037T,C3267T,C5388A,C5986T,T6954C,C7165T,C9611T,C14408T,C14676T,C15279T,T16176C,C21855T,A23063T,C23271A,A23403G,C23604A,C23709T,T24506G,G24914C,A25336C,C27972T,G28048T,A28111G,G28280C,A28281T,T28282A,A28295G,G28881A,G28882A,G28883C,C28977T                                                                                                        | N:D3L:N:R203K,N:G204R,N:S235F,ORF1a:1730F,ORF1a:T1001,ORF1a:A1708D,ORF1a:I2230T,ORF1a:L3116F,ORF1b:P314L,ORF8:Q27*,ORF8:R52I,ORF8:Y73C,S598F,S:N501Y,S:A570D,S:D614G,S:P681H,S:T716I,S:S982A,S:D1118H,S:E1258D                                             | 6 | 0  |
| hCoV-19/Mexico/QUE-IndRE_FB15667_S2377/2021 | EPI_ISL_2455902 | B.1.1.7 | GRY | 38 | C241T,C913T,C2453T,C3037T,C3267T,C5388A,C5986T,T6954C,C9611T,C9679T,C14408T,C14676T,C15279T,C15981T,T16176C,C17304T,C21855T,A23063T,C23271A,A23403G,C23604A,C23709T,T24506G,G24914C,A25336C,G27754T,C27972T,G28048T,A28111G,G28280C,A28281T,T28282A,A28295G,G28881A,G28882A,G28883C,C28977T                                                                                | N:D3L:N:R203K,N:G204R,N:S235F,ORF1a:1730F,ORF1a:T1001,ORF1a:A1708D,ORF1a:I2230T,ORF1a:L3116F,ORF1b:P314L,ORF7a:E121*,ORF8:Q27*,ORF8:R52I,ORF8:Y73C,S598F,S:D138H,S:N501Y,S:A570D,S:D614G,S:P681H,S:T716I,S:S982A,S:D1118H,S:E1258D                         | 6 | 25 |
| hCoV-19/Mexico/QUE-IndRE_FB15699_S2378/2021 | EPI_ISL_2455903 | B.1.1.7 | GRY | 37 | C241T,C913T,C2453T,C3037T,C3267T,C5388A,C5986T,T6954C,C14408T,C14676T,T15096C,C15279T,T16176C,C17676T,C18183T,C19524T,A21519C,A23063T,C23271A,A23403G,C23604A,C23709T,A24070T,T24506G,G24914C,A25336C,C25624T,C27972T,G28048T,A28111G,G28280C,A28281T,T28282A,G28881A,G28882A,G28883C,C28977T                                                                              | N:D3L:N:R203K,N:G204P,N:S235F,ORF1a:T1001,ORF1a:A1708D,ORF1a:A2128T,ORF1a:I2230T,ORF1b:P314L,ORF1b:R2684S,ORF3a:H78Y,ORF8:Q27*,ORF8:R52I,ORF8:Y73C,S598F,S:N501Y,S:A570D,S:D614G,S:P681H,S:T716I,S:S982A,S:D1118H,S:E1258D                                 | 6 | 24 |
| hCoV-19/Mexico/QUE-IndRE_FB15700_S2379/2021 | EPI_ISL_2455904 | B.1.1.7 | GRY | 39 | C241T,C913T,C2453T,C3037T,C3267T,C5388A,C5986T,T6954C,T7984C,A9048G,C14120T,C14408T,C14676T,C15279T,T16176C,A19302T,C20629T,A23063T,C23271A,A23403G,C23601T,C23604A,G23678T,C23709T,T24506G,G24914C,A25336C,C27972T,G28048T,A28111G,G28280C,A28281T,T28282A,G28881A,G28882A,G28883C,C28977T                                                                                | N:D3L:N:R203K,N:G204R,N:S235F,ORF1a:T1001,ORF1a:A1708D,ORF1a:D1939G,ORF1a:I2230T,ORF1a:K2928R,ORF1b:P218L,ORF1b:P314L,ORF1b:H2388Y,ORF8:Q27*,ORF8:R52I,ORF8:Y73C,S598F,S:N501Y,S:A570D,S:D614G,S5680F,S:P681H,S:A7065,S:T716I,S:S982A,S:D1118H,S:E1258D    | 6 | 23 |
| hCoV-19/Mexico/QUE-IndRE_FB15725_S2380/2021 | EPI_ISL_2455905 | B.1.1.7 | GRY | 38 | C241T,C913T,C2453T,C3037T,C3267T,T3745C,C5388A,C5986T,T6954C,C9611T,C14408T,C14676T,C15279T,T16176C,C21855T,G21974C,A23063T,C23271A,A23403G,C23604A,C23709T,T24506G,G24914C,A25336C,G26153T,C27972T,G28048T,A28111G,G28280C,A28281T,T28282A,A28295G,G28881A,G28882A,G28883C,C28977T                                                                                        | N:D3L:N:R203K,N:G204R,N:S235F,ORF1a:1730F,ORF1a:T1001,ORF1a:A1708D,ORF1a:I2230T,ORF1a:L3116F,ORF1b:P314L,ORF3a:G254V,ORF8:Q27*,ORF8:R52I,ORF8:Y73C,S598F,S:D138H,S:N501Y,S:A570D,S:D614G,S:P681H,S:T716I,S:S982A,S:D1118H,S:E1258D                         | 6 | 25 |
| hCoV-19/Mexico/QUE-IndRE_FB15757_S2381/2021 | EPI_ISL_2455906 | B.1.1.7 | GRY | 36 | C241T,C913T,C2453T,C3037T,C3267T,C5388A,C5986T,T6954C,C9611T,C14408T,C14676T,C15279T,T16176C,C21008T,C21855T,A23063T,C23271A,A23403G,C23604A,C23709T,T24506G,G24914C,A25271G,A25336C,C27643T,C27972T,G28048T,A28111G,G28280C,A28281T,T28282A,A28295G,G28881A,G28882A,G28883C,C28977T                                                                                       | N:D3L:N:R203K,N:G204R,N:S235F,ORF1a:1730F,ORF1a:T1001,ORF1a:A1708D,ORF1a:I2230T,ORF1a:L3116F,ORF1b:P314L,ORF7a:W29*,ORF8:Q27*,ORF8:R52I,ORF8:Y73C,S598F,S:N501Y,S:A570D,S:D614G,S:P681H,S:T716I,S:S982A,S:D1118H,S:E1258D                                  | 6 | 25 |
| hCoV-19/Mexico/QUE-IndRE_FB15774_S2382/2021 | EPI_ISL_2455907 | B.1.1.7 | GRY | 36 | C241T,C913T,C2453T,C3037T,C3267T,C5388A,C5986T,T6954C,G7042T,T10123C,C14120T,C14408T,C14676T,C15279T,T16176C,T17583G,A23063T,C23271A,G23401T,A23403G,C23604A,C23709T,T24506G,G24914C,A25336C,C25624T,G25690T,C27972T,G28048T,A28111G,G28280C,A28281T,T28282A,G28881A,G28882A,G28883C,C28977T                                                                               | N:D3L:N:R203K,N:G204R,N:S235F,ORF1a:A859V,ORF1a:T1001,ORF1a:A1708D,ORF1a:I2230T,ORF1a:M2509I,ORF1b:P314L,ORF1b:R2684S,ORF3a:H78Y,ORF3a:G100C,ORF8:Q27*,ORF8:R52I,ORF8:Y73C,S598F,S:N501Y,S:A570D,S:Q613H,S:D614G,S:P681H,S:T716I,S:S982A,S:D1118H,S:E1258D | 6 | 26 |
| hCoV-19/Mexico/QUE-IndRE_FB15777_S2383/2021 | EPI_ISL_2455908 | B.1.1.7 | GRY | 39 | 80C,A28281T,T28282A,G28846T,G28881A,G28882A,G28883C,C28977T                                                                                                                                                                                                                                                                                                                | N:D3L:N:R203K,N:G204R,N:S235F,ORF1a:1730F,ORF1a:T1001,ORF1a:A1708D,ORF1a:I2230T,ORF1a:N2405S,ORF1a:L3116F,ORF1b:P314L,ORF8:Q27*,ORF8:R52I,ORF8:Y73C,S598F,S:N501Y,S:A570D,S:D614G,S:P681H,S:T716I,S:S982A,S:D1118H,S:E1258D                                | 6 | 25 |
| hCoV-19/Mexico/QUE-IndRE_FB15789_S2384/2021 | EPI_ISL_2455909 | B.1.1.7 | GRY | 34 | C241T,C913T,C2453T,C3037T,C3267T,C5388A,C5986T,T6954C,A7479G,C9611T,C14408T,C14676T,C15279T,T16176C,C21855T,A23063T,C23271A,A23403G,C23604A,C23709T,T24506G,G24914C,A25336C,C27972T,G28048T,A28111G,G28280C,A28281T,T28282A,A28295G,G28881A,G28882A,G28883C,C28977T                                                                                                        | N:D3L:N:R203K,N:G204R,N:S235F,ORF1a:1730F,ORF1a:T1001,ORF1a:A1708D,ORF1a:I2230T,ORF1a:N2405S,ORF1a:L3116F,ORF1b:P314L,ORF8:Q27*,ORF8:R52I,ORF8:Y73C,S598F,S:N501Y,S:A570D,S:D614G,S:P681H,S:T716I,S:S982A,S:D1118H,S:E1258D                                | 6 | 24 |
| hCoV-19/Mexico/QUE-IndRE_FB15790_S2385/2021 | EPI_ISL_2455910 | B.1.1.7 | GRY | 34 | C241T,C913T,C1191T,C2453T,C3037T,C3267T,C5388A,C5986T,T6954C,A7479G,C9611T,C11339T,C14408T,C14676T,C15279T,T16176C,C21855T,A23063T,C23271A,A23403G,C23604A,C23709T,T24506G,G24914C,A25336C,C27972T,G28048T,A28111G,G28280C,A28281T,T28282A,A28295G,G28881A,G28882A,G28883C,C28977T                                                                                         | N:D3L:N:R203K,N:G204R,N:S235F,ORF1a:P309L,ORF1a:1730F,ORF1a:T1001,ORF1a:A1708D,ORF1a:I2230T,ORF1a:N2405S,ORF1a:L3116F,ORF1b:P314L,ORF8:Q27*,ORF8:R52I,ORF8:Y73C,S598F,S:N501Y,S:A570D,S:D614G,S:P681H,S:T716I,S:S982A,S:D1118H,S:E1258D                    | 6 | 24 |
| hCoV-19/Mexico/QUE-IndRE_FB15807_S2386/2021 | EPI_ISL_2455911 | B.1.1.7 | GRY | 36 | 5G,G28881A,G28882A,G28883C,C28977T                                                                                                                                                                                                                                                                                                                                         | N:D3L:N:R203K,N:G204R,N:S235F,ORF1a:P626T,ORF1a:T1001,ORF1a:A1708D,ORF1a:I2230T,ORF1a:N2405S,ORF1a:L3116F,ORF1b:P314L,ORF8:Q27*,ORF8:R52I,ORF8:Y73C,S598F,S:N501Y,S:A570D,S:D614G,S:P681H,S:T716I,S:S982A,S:D1118H,S:E1258D                                | 6 | 25 |
| hCoV-19/Mexico/QUE-IndRE_FB15808_S2387/2021 | EPI_ISL_2455912 | B.1.1.7 | GRY | 37 | T28282A,G28881A,G28882A,G28883C,C28977T                                                                                                                                                                                                                                                                                                                                    | N:D3L:N:R203K,N:G204R,N:S235F,ORF1a:1730F,ORF1a:T1001,ORF1a:A1708D,ORF1a:I2230T,ORF1a:L3116F,ORF1b:P314L,ORF7b:W29*,ORF8:Q27*,ORF8:R52I,ORF8:Y73C,S598F,S:N501Y,S:A570D,S:D614G,S:P681H,S:T716I,S:S982A,S:D1118H,S:E1258D                                  | 6 | 24 |
| hCoV-19/Mexico/QUE-IndRE_FB16146_S2439/2021 | EPI_ISL_2455963 | B.1.1.7 | GRY | 35 | 881A,G28882A,G28883C,C28977T                                                                                                                                                                                                                                                                                                                                               | N:D3L:N:R203K,N:G204R,N:S235F,ORF1a:P309L,ORF1a:1730F,ORF1a:T1001,ORF1a:A1708D,ORF1a:I2230T,ORF1a:N2405S,ORF1a:L3116F,ORF1b:P314L,ORF8:Q27*,ORF8:R52I,ORF8:Y73C,S598F,S:N501Y,S:A570D,S:D614G,S:P681H,S:T716I,S:S982A,S:D1118H,S:E1258D                    | 6 | 24 |
| hCoV-19/Mexico/QUE-IndRE_FB16154_S2438/2021 | EPI_ISL_2455962 | B.1.1.7 | GRY | 35 | 81A,G28882A,G28883C,C28977T                                                                                                                                                                                                                                                                                                                                                | N:D3L:N:R203K,N:G204R,N:S235F,ORF1a:T1001,ORF1a:N1076S,ORF1a:A1708D,ORF1a:I2230T,ORF1b:P314L,ORF8:Q27*,ORF8:R52I,ORF8:Y73C,S598F,S:N501Y,S:A570D,S:D614G,S:P681H,S:T716I,S:S982A,S:D1118H,S:E1258D                                                         | 6 | 25 |
| hCoV-19/Mexico/QUE-IndRE_FB16156_S2437/2021 | EPI_ISL_2455961 | B.1.1.7 | GRY | 34 | 4914C,A25164T,A25336C,C27972T,G28048T,A28111G,G28280C,A28281T,T28282A,G28881A,G28882A,C2784T,C913T,C2710T,C3037T,C3267T,A3492G,C5388A,C5986T,T6954C,C14408T,C14676T,C15279T,T16176C,C20148T,C21639A,A23063T,C23271A,A23403G,C23604A,C23709T,T24506G,G24914C,A25336C,G2914C,A25164T,A25336C,C27972T,G28048T,A28111G,G28280C,A28281T,T28282A,G28881A,G28882A,G28883C,C28977T | N:D3L:N:R203K,N:G204R,N:S235F,ORF1a:T1001,ORF1a:N1076S,ORF1a:A1708D,ORF1a:I2230T,ORF1b:P314L,ORF8:Q27*,ORF8:R52I,ORF8:Y73C,S598F,S:N501Y,S:A570D,S:D614G,S:P681H,S:T716I,S:S982A,S:D1118H,S:E1258D                                                         | 6 | 23 |
| hCoV-19/Mexico/QUE-IndRE_FB16157_S2436/2021 | EPI_ISL_2455960 | B.1.1.7 | GRY | 36 | 2A,G28881A,G28882A,G28883C,C28977T                                                                                                                                                                                                                                                                                                                                         | N:D3L:N:R203K,N:G204R,N:S235F,ORF1a:1730F,ORF1a:T1001,ORF1a:A1708D,ORF1a:I2230T,ORF1a:N2405S,ORF1a:L3116F,ORF1b:P314L,ORF8:Q27*,ORF8:R52I,ORF8:Y73C,S598F,S:N501Y,S:A570D,S:D614G,S:P681H,S:T716I,S:S982A,S:D1118H,S:E1258D                                | 6 | 25 |
| hCoV-19/Mexico/QUE-IndRE_FB16164_S2460/2021 | EPI_ISL_2455981 | B.1.1.7 | GRY | 35 | 881A,G28882A,G28883C,C28977T                                                                                                                                                                                                                                                                                                                                               | N:D3L:N:R203K,N:G204R,N:S235F,ORF1a:T1001,ORF1a:A1708D,ORF1a:I2230T,ORF1a:N2405S,ORF1a:L3116F,ORF1b:P314L,ORF8:Q27*,ORF8:R52I,ORF8:Y73C,S598F,S:N501Y,S:A570D,S:D614G,S:P681H,S:T716I,S:S982A,S:D1118H,S:E1258D                                            | 6 | 25 |
| hCoV-19/Mexico/QUE-IndRE_FB16431_S2481/2021 | EPI_ISL_2456002 | B.1.1.7 | GRY | 40 | C241T,C913T,C1191T,C2453T,C3037T,C3267T,C5388A,C5986T,T6954C,T7984C,T9508C,A12964G,C14120T,C14408T,C14676T,C15279T,T16176C,C16323T,C16575T,C17004T,C17518T,C19390T,A23063T,C23271A,A23403G,C23604A,C23709T,T24506G,G24914C,C27972T,G28048T,A28111G,G28280C,A28281T,T28282A,G28881A,G28882A,G28883C,C28977T                                                                 | N:D3L:N:R203K,N:G204R,N:S235F,ORF1a:T1001,ORF1a:A1708D,ORF1a:I2230T,ORF1b:P218L,ORF1b:P314L,ORF1b:L1351F,ORF1b:P1975S,ORF8:Q27*,ORF8:R52I,ORF8:Y73C,ORF8:P855S,S:N501Y,S:A570D,S:D614G,S:P681H,S:T716I,S:S982A,S:D1118H,S:E1258D                           | 6 | 25 |
| hCoV-19/Mexico/QUE-IndRE_FB16434_S2738/2021 | EPI_ISL_2533764 | B.1.1.7 | GRY | 41 | 8048T,A28111G,G28280C,A28281T,T28282A,G28881A,G28882A,G28883C,G28884C,C28977T                                                                                                                                                                                                                                                                                              | N:D3L:N:R203K,N:G204P,N:S235F,ORF1a:T1001,ORF1a:A1708D,ORF1a:A2128T,ORF1a:I2230T,ORF1b:P314L,ORF1b:R2684S,ORF3a:H78Y,ORF8:Q27*,ORF8:R52I,ORF8:Y73C,S598F,S:N501Y,S:A570D,S:D614G,S:P681H,S:T716I,S:S982A,S:D1118H,S:E1258D                                 | 6 | 26 |



|                                             |                 |         |     |    |                                                                                                                                                                                                                                                                                                                                                                                             |                                                                                                                                                                                                                                                         |    |      |
|---------------------------------------------|-----------------|---------|-----|----|---------------------------------------------------------------------------------------------------------------------------------------------------------------------------------------------------------------------------------------------------------------------------------------------------------------------------------------------------------------------------------------------|---------------------------------------------------------------------------------------------------------------------------------------------------------------------------------------------------------------------------------------------------------|----|------|
| hCoV-19/Mexico/ROO-INdRE_FB17190_S0389/2021 | EPI_ISL_2663356 | B.1.1.7 | GRY | 39 | C222T,C241T,C913T,C2110T,C3037T,C3267T,C4423T,C5388A,C5986T,C6681T,T6954C,G7042T,A10359G,C14120T,C14408T,C14676T,C15279T,T16176C,C17762T,A23063T,C23271A,A23403G,C23604A,G23608T,C23709T,T24506G,G24914C,T25180C,C27972T,G28048T,A28095T,A28111G,G28280C,A28281T,T28282A,G28881A,G28882A,G28883C,C28977T                                                                                    | N:D3L:N:R203K,N:G204R,N:S235F,ORF1a:T1001,ORF1a:A1708D,ORF1a:A2139V,ORF1a:I2230T,ORF1a:M2259I,ORF1a:K3365R,ORF1b:P218L,ORF1b:P314L,ORF1b:A1432V,ORF8:Q27*,ORF8:R52I,ORF8:K68*,ORF8:Y73C,S:N501Y,SA570D,S:D614G,S:P681H,S:T716I,S:S982A,S:D1118H         | 6  | 0    |
| hCoV-19/Mexico/ROO-INdRE_FB17192_S0390/2021 | EPI_ISL_2663357 | B.1.1.7 | GRY | 34 | C241T,T287A,C913T,G2144A,C2453T,C3037T,C3267T,C4534T,C5388A,C5986T,T6954C,C9611T,C14408T,C14676T,C15279T,T16176C,G18651T,C21812T,C21855T,G21974C,A23063T,C23271A,A23403G,C23604A,G23608T,C23709T,T24506G,G24914C,A26206G,C27972T,G28048T,A28111G,G28280C,G28883C,C28977T                                                                                                                    | N:D3L:N:R203K,N:G204R,N:S235F,ORF1a:F8I,ORF1a:V627I,ORF1a:L730F,ORF1a:T1001,ORF1a:A1708D,ORF1a:I2230T,ORF1a:L3116F,ORF1b:P314L,ORF1b:E1728D,ORF8:Q27*,ORF8:R52I,ORF8:Y73C,S:S98F,S:D138H,S:N501Y,SA570D,S:D614G,S:P681H,S:T716I,S:S982A,S:D1118H        | 6  | 0    |
| hCoV-19/Mexico/ROO-INdRE_FB19165_S4499/2021 | EPI_ISL_3033353 | B.1.1.7 | GRY | 39 | C241T,T287A,C913T,G2144A,C2453T,C3037T,C3267T,C5388A,C5986T,T6954C,C9286T,C9611T,A12547G,C14408T,C14676T,C15279T,T16176C,G18651T,C21855T,G21974C,C23271A,A23403G,C23604A,C23709T,T24506G,G24914C,C27972T,G28048T,A28111G,G28280C,A28281T,T28282A,A28295G,G28881A,G28882A,G28883C,C28977T                                                                                                    | N:D3L:N:R203K,N:G204R,N:S235F,ORF1a:V111A,ORF1a:V627I,ORF1a:L730F,ORF1a:T1001,ORF1a:A1708D,ORF1a:I2230T,ORF1a:L3116F,ORF1b:P314L,ORF1b:E1728D,ORF8:Q27*,ORF8:R52I,ORF8:Y73C,S:S98F,S:D138H,SA570D,S:D614G,S:P681H,S:T716I,S:S982A,S:D1118H              | 6  | 0    |
| hCoV-19/Mexico/ROO-INMEGEN-05-06-205/2021   | EPI_ISL_2603694 | B.1.1.7 | GR  | 38 | C241T,C823T,C913T,C1758T,C2110T,G3004T,C3037T,C3267T,C5388A,C5986T,T6954C,G7042T,C9559T,C14120T,C14408T,C14676T,C15279T,T16176C,C23271A,A23403G,C23604A,C23709T,C24208T,T24506G,G24914C,C26110T,C27972T,G28048T,A28095T,A28111G,G28280C,A28281T,T28282A,G28881A,G28882A,G28883C,C28977T                                                                                                     | N:D3L:N:R203K,N:G204R,N:S235F,ORF1a:A913D,ORF1a:E913D,ORF1a:T1001,ORF1a:A1708D,ORF1a:I2230T,ORF1a:M2259I,ORF1a:P218L,ORF1b:P314L,ORF1b:P240S,ORF8:Q27*,ORF8:R52I,ORF8:K68*,ORF8:Y73C,SA570D,S:D614G,S:P681H,S:T716I,S:S982A,S:D1118H                    | 6  | 329  |
| hCoV-19/Mexico/ROO-INMEGEN-05-06-212/2021   | EPI_ISL_2603700 | B.1.1.7 | GR  | 37 | C241T,C913T,C2110T,G3004T,C3037T,C3267T,C5388A,C5986T,T6954C,G7042T,C10525T,C10789T,C14120T,C14408T,C14676T,C15279T,T16176C,C23271A,A23403G,G23593T,C23604A,C23709T,T24506G,G24914C,C26110T,C26735T,G27281T,C27972T,G28048T,A28095T,A28111G,G28280C,A28281T,T28282A,G28881A,G28882A,G28883C,C28977T                                                                                         | N:D3L:N:R203K,N:G204R,N:S235F,ORF1a:E913D,ORF1a:T1001,ORF1a:A1708D,ORF1a:I2230T,ORF1a:M2259I,ORF1b:P218L,ORF1b:P314L,ORF1b:P240S,ORF8:Q27*,ORF8:R52I,ORF8:K68*,ORF8:Y73C,SA570D,S:D614G,S:P681H,S:T716I,S:S982A,S:D1118H                                | 6  | 1569 |
| hCoV-19/Mexico/ROO-INMEGEN-05-06-268/2021   | EPI_ISL_2603738 | B.1.1.7 | GR  | 40 | C222T,C241T,C913T,C2110T,C3037T,C3267T,C5388A,C5986T,T6954C,G7042T,C8389T,C9979T,G11029T,C12115T,C14120T,C14408T,C14676T,C15279T,T16176C,G16900T,C17762T,C23271A,A23403G,C23604A,C23709T,T24506G,G24914C,T25180C,G26416T,G27664T,C27972T,G28048T,A28111G,G28280C,A28281T,T28282A,G28881A,G28882A,G28883C,C28977T                                                                            | N:D3L:N:R203K,N:G204R,N:S235F,ORF1a:T1001,ORF1a:A1708D,ORF1a:I2230T,ORF1a:M2259I,ORF1a:L3588F,ORF1b:P218L,ORF1b:P314L,ORF1b:G1145C,ORF1b:A1432V,ORF7a:E91*,ORF8:Q27*,ORF8:R52I,ORF8:Y73C,SA570D,S:D614G,S:P681H,S:T716I,S:S982A,S:D1118H                | 6  | 403  |
| hCoV-19/Mexico/ROO-INMEGEN-06-01-197/2021   | EPI_ISL_2616800 | B.1.1.7 | GR  | 40 | T99C,C241T,C913T,C3037T,C3267T,C5284T,C5388A,C5986T,T6954C,A9238G,C10369T,C14408T,C14676T,C15279T,T16176C,C17004T,A17615G,G20056A,A23063T,C23271A,A23403G,C23604A,C23709T,T24506G,G24914C,C25413T,G26062T,G26065T,C27972T,G28048T,A28111G,G28280C,A28281T,T28282A,G28881A,G28882A,G28883C,C28977T                                                                                           | N:D3L:N:R203K,N:G204R,N:S235F,ORF1a:T1001,ORF1a:A1708D,ORF1a:I2230T,ORF1b:P314L,ORF1b:K1383R,ORF1b:L2197S,ORF3a:G224C,ORF3a:V225F,ORF8:Q27*,ORF8:R52I,ORF8:Y73C,S:N501Y,SA570D,S:D614G,S:P681H,S:T716I,S:S982A,S:D1118H                                 | 6  | 1234 |
| hCoV-19/Mexico/ROO-INMEGEN-06-01-205/2021   | EPI_ISL_2616938 | B.1.1.7 | GRY | 39 | C222T,C241T,C913T,C2110T,C3037T,C3267T,C4423T,C5388A,C5986T,C6681T,T6954C,G7042T,A10359G,C14120T,C14408T,C14676T,C15279T,T16176C,C17762T,A23063T,C23271A,A23403G,C23604A,G23608T,C23709T,T24506G,G24914C,T25180C,C27972T,G28048T,A28095T,A28111G,G28280C,A28281T,T28282A,G28881A,G28882A,G28883C,C28977T                                                                                    | N:D3L:N:R203K,N:G204R,N:S235F,ORF1a:T1001,ORF1a:A1708D,ORF1a:A2139V,ORF1a:I2230T,ORF1a:M2259I,ORF1a:K3365R,ORF1b:P218L,ORF1b:P314L,ORF1b:A1432V,ORF8:Q27*,ORF8:R52I,ORF8:K68*,ORF8:Y73C,S:N501Y,SA570D,S:D614G,S:P681H,S:T716I,S:S982A,S:D1118H         | 6  | 410  |
| hCoV-19/Mexico/ROO-INMEGEN-06-01-212/2021   | EPI_ISL_2616851 | B.1.1.7 | GRY | 40 | C241T,C913T,C3037T,C3267T,G5023A,C5388A,C5986T,C6568T,T6954C,G8183A,A9529G,G10396T,C14408T,C14676T,C15279T,T16176C,A17615G,G17721T,G20962A,G22094C,C23271A,A23403G,C23604A,C23709T,T24506G,G24914C,G26730C,C27972T,G28048T,A28111G,G28280C,A28281T,T28282A,G28881A,G28882A,G28883C,C28977T                                                                                                  | N:D3L:N:R203K,N:G204R,N:S235F,ORF1a:E972K,ORF1a:T1001,ORF1a:J1586I,ORF1a:A1708D,ORF1a:I2230T,ORF1a:G2640R,ORF1b:P218L,ORF1b:P314L,ORF1b:K1383R,ORF1b:D2499N,ORF8:Q27*,ORF8:R52I,ORF8:Y73C,S:D178H,SA570D,S:D614G,S:P681H,S:T716I,S:S982A,S:D1118H       | 6  | 873  |
| hCoV-19/Mexico/ROO-INMEGEN-06-01-220/2021   | EPI_ISL_2616979 | Q.3     | GR  | 38 | C241T,C913T,C3037T,C3267T,A3350G,C5388A,T6954C,G14202A,C14408T,C14676T,C15279T,T16176C,C17002T,A17615G,G22081A,C23271A,A23403G,C23604A,C23709T,T24506G,G24914C,G27972T,G28048T,A28095T,A28111G,G28280C,A28281T,T28282A,G28881A,G28882A,G28883C,C28977T                                                                                                                                      | N:D3L:N:R203K,N:G204R,N:S235F,ORF1a:T1001,ORF1a:S1029G,ORF1a:A1708D,ORF1a:I2230T,ORF1b:P314L,ORF1b:L1179F,ORF1b:K1383R,ORF1b:R2570A,ORF8:Q27*,ORF8:R52I,ORF8:Y73C,SA570D,S:D614G,S:P681H,S:T716I,S:S982A,S:D1118H                                       | 6  | 2592 |
| hCoV-19/Mexico/ROO-INMEGEN-06-01-224/2021   | EPI_ISL_2616981 | B.1.1.7 | GR  | 32 | G27467C,T27972T,G28048T,A28111G,G28280C,A28281T,T28282A,G28881A,G28882A,G28883C,C241T,C913T,C3037T,C3267T,G3431T,C4752T,C5388A,C5986T,T6954C,C9693T,C11572T,C14408T,C14676T,C15279T,T16176C,G18651A,C18788T,T23042C,A23063T,C23271A,A23403G,C23604A,C23709T,T24506G,G24914C,G25218T,C25553T,G25660C,C27615T,C27972T,G28048T,A28111G,G28280C,A28281T,T28282A,G28881A,G28882A,G28883C,C28977T | N:D3L:N:R203K,N:G204R,N:S235F,ORF1a:T1001,ORF1a:V1056L,ORF1a:T1496I,ORF1a:A1708D,ORF1a:I2230T,ORF1a:A3143V,ORF1b:P314L,ORF1b:L7740R,ORF3a:A54V,ORF3a:V90L,ORF8:Q27*,ORF8:R52I,ORF8:Y73C,S:S494P,S:N501Y,SA570D,S:D614G,S:P681H,S:T716I,S:S982A,S:D1118H | 6  | 2367 |
| hCoV-19/Mexico/ROO-INMEGEN-06-01-233/2021   | EPI_ISL_2616887 | B.1.1.7 | GRY | 39 | C241T,C913T,C2110T,C2143T,C3037T,G3047T,C3267T,C5388A,C5986T,C6730T,C7945T,A10195G,C10834T,C14120T,C14408T,C14676T,C15279T,T16176C,T20445C,A23063T,C23271A,A23403G,C23604A,C23709T,T24506G,G24914C,C27972T,G28048T,G28075T,A28111G,C28236T,G28280C,A28281T,T28282A,G28881A,G28882A,G28883C,C28977T,C29642T                                                                                  | N:D3L:N:R203K,N:G204R,N:A208G,N:S235F,ORF1a:D928T,ORF1a:T1001,ORF1a:A1708D,ORF1b:P218L,ORF1b:P314L,ORF8:Q27*,ORF8:R52I,ORF8:Y73C,ORF8:CG1F,ORF8:Y73C,ORF8:R115C,S:N501Y,SA570D,S:D614G,S:P681H,S:T716I,S:S982A,S:D1118H                                 | 22 | 756  |
| hCoV-19/Mexico/ROO-INMEGEN-06-01-241/2021   | EPI_ISL_2616867 | B.1.1.7 | GRY | 40 | C241T,C913T,G2281A,C3037T,C3267T,C5388A,C5986T,T6954C,A12162G,C13665T,C14408T,C14676T,C15279T,C15720T,T16176C,A17615G,C18747T,C20844T,A21137G,A23063T,C23271A,A23403G,C23604A,C23709T,T24506G,G24914C,G25135T,C26110T,G26828T,C27972T,G28048T,A28111G,G28280C,A28281T,T28282A,G28881A,G28882A,G28883C,C28977T,C29095T                                                                       | N:D3L:N:R203K,N:G204R,N:S235F,ORF1a:T1001,ORF1a:A1708D,ORF1a:I2230T,ORF1a:M2259I,ORF1a:L3588F,ORF1b:P218L,ORF1b:P314L,ORF1b:G1145C,ORF1b:A1432V,ORF7a:E91*,ORF8:Q27*,ORF8:R52I,ORF8:Y73C,SA570D,S:D614G,S:P681H,S:T716I,S:S982A,S:D1118H                | 6  | 631  |
| hCoV-19/Mexico/ROO-INMEGEN-06-01-253/2021   | EPI_ISL_2616989 | B.1.1.7 | GRY | 40 | 8111G,G28280C,A28281T,T28282A,G28881A,G28882A,G28883C,C28977T,C29095T,C222T,C241T,C913T,C2110T,C3037T,C3267T,C5388A,C5986T,T6954C,G7042T,C8389T,C9979T,G11029T,C12115T,C14120T,C14408T,C14676T,C15279T,T16176C,G16900T,C17762T,C23271A,A23403G,C23604A,C23709T,T24506G,G24914C,T25180C,G26416T,G27664T,C27972T,G28048T,A28111G,G28280C,A28281T,T28282A,G28881A,G28882A,G28883C,C28977T      | N:D3L:N:R203K,N:G204R,N:S235F,ORF1a:T1001,ORF1a:A1708D,ORF1a:I2230T,ORF1a:M2259I,ORF1a:K3365R,ORF1b:P218L,ORF1b:P314L,ORF1b:G1145C,ORF1b:A1432V,ORF7a:E91*,ORF8:Q27*,ORF8:R52I,ORF8:Y73C,SA570D,S:D614G,S:P681H,S:T716I,S:S982A,S:D1118H                | 6  | 1720 |
| hCoV-19/Mexico/ROO-INMEGEN-06-01-268/2021   | EPI_ISL_2616994 | B.1.1.7 | GR  | 40 | A28111G,G28280C,A28281T,T28282A,G28881A,G28882A,G28883C,C28977T                                                                                                                                                                                                                                                                                                                             | N:D3L:N:R203K,N:G204R,N:S235F,ORF1a:T1001,ORF1a:A1708D,ORF1a:A2139V,ORF1a:I2230T,ORF1a:M2259I,ORF1a:K3365R,ORF1b:P218L,ORF1b:P314L,ORF1b:A1432V,ORF8:Q27*,ORF8:R52I,ORF8:K68*,ORF8:Y73C,S:N501Y,SA570D,S:D614G,S:P681H,S:T716I,S:S982A,S:D1118H         | 24 | 103  |
| hCoV-19/Mexico/ROO-INMEGEN-06-01-301/2021   | EPI_ISL_2616969 | B.1.1.7 | GRY | 40 | C222T,C241T,C913T,C2110T,C3037T,C3267T,C4423T,C5388A,C5986T,C6681T,T6954C,G7042T,A10359G,C14120T,C14408T,C14676T,C15279T,T16176C,C17762T,C21622T,C23271A,A23403G,C23604A,G23608T,C23709T,T24506G,G24914C,T25180C,C27972T,G28048T,A28095T,A28111G,G28280C,A28281T,T28282A,G28881A,G28882A,G28883C,C28977T                                                                                    | N:D3L:N:R203K,N:G204R,N:S235F,ORF1a:T1001,ORF1a:A1708D,ORF1a:A2139V,ORF1a:I2230T,ORF1a:M2259I,ORF1a:K3365R,ORF1b:P218L,ORF1b:P314L,ORF1b:A1432V,ORF8:Q27*,ORF8:R52I,ORF8:K68*,ORF8:Y73C,SA570D,S:D614G,S:P681H,S:T716I,S:S982A,S:D1118H                 | 24 | 941  |
| hCoV-19/Mexico/ROO-INMEGEN-06-01-309/2021   | EPI_ISL_2616841 | B.1.1.7 | GR  | 39 | G28280C,A28281T,T28282A,G28881A,G28882A,G28883C,C28977T                                                                                                                                                                                                                                                                                                                                     | N:D3L:N:R203K,N:G204R,N:S235F,ORF1a:L730F,ORF1a:T1001,ORF1a:A1708D,ORF1a:I2230T,ORF1a:L3116F,ORF1b:P314L,ORF8:Q27*,ORF8:R52I,ORF8:Y73C,S:S98F,S:D138H,S:N501Y,SA570D,S:D614G,S:P681H,S:T716I,S:S982A,S:D1118H                                           | 23 | 4    |
| hCoV-19/Mexico/ROO-INMEGEN-06-01-322/2021   | EPI_ISL_2616965 | B.1.1.7 | GRY | 34 | C222T,C241T,C913T,C2110T,C3037T,C3267T,C4423T,C5388A,C5986T,C6681T,T6954C,G7042T,A10359G,C14120T,C14408T,C14676T,C15279T,T16176C,C17762T,A23063T,C23271A,A23403G,C23604A,G23608T,C23709T,T24506G,G24914C,T25180C,C27972T,G28048T,A28095T,A28111G,G28280C,A28281T,T28282A,G28881A,G28882A,G28883C,C28977T,C29733T                                                                            | N:D3L:N:R203K,N:G204R,N:S235F,ORF1a:T1001,ORF1a:A1708D,ORF1a:A2139V,ORF1a:I2230T,ORF1a:M2259I,ORF1a:K3365R,ORF1b:P218L,ORF1b:P314L,ORF1b:A1432V,ORF8:Q27*,ORF8:R52I,ORF8:K68*,ORF8:Y73C,S:N501Y,SA570D,S:D614G,S:P681H,S:T716I,S:S982A,S:D1118H         | 6  | 302  |
| hCoV-19/Mexico/ROO-INMEGEN-06-01-342/2021   | EPI_ISL_2616963 | B.1.1.7 | GRY | 40 | C222T,C241T,C913T,C2110T,C3037T,C3267T,C4423T,C5388A,C5986T,C6681T,T6954C,G7042T,A10359G,C14120T,C14408T,C14676T,C15279T,T16176C,C17762T,A23063T,C23271A,A23403G,C23604A,G23608T,C23709T,T24506G,G24914C,T25180C,C27972T,G28048T,A28095T,A28111G,G28280C,A28281T,T28282A,G28881A,G28882A,G28883C,C28977T,C29733T                                                                            | N:D3L:N:R203K,N:G204R,N:S235F,ORF1a:T1001,ORF1a:A1708D,ORF1a:A2139V,ORF1a:I2230T,ORF1a:M2259I,ORF1a:K3365R,ORF1b:P218L,ORF1b:P314L,ORF1b:A1432V,ORF8:Q27*,ORF8:R52I,ORF8:K68*,ORF8:Y73C,S:N501Y,SA570D,S:D614G,S:P681H,S:T716I,S:S982A,S:D1118H         | 6  | 302  |

|                                           |                 |         |     |    |                                                                                                                                                                                                                                                                                                                                                                                                                                                                                                                                                                                                                                                                                                                                                                                                                                                                                                                                                                                 |                                                                                                                                                                                                                                                       |   |      |
|-------------------------------------------|-----------------|---------|-----|----|---------------------------------------------------------------------------------------------------------------------------------------------------------------------------------------------------------------------------------------------------------------------------------------------------------------------------------------------------------------------------------------------------------------------------------------------------------------------------------------------------------------------------------------------------------------------------------------------------------------------------------------------------------------------------------------------------------------------------------------------------------------------------------------------------------------------------------------------------------------------------------------------------------------------------------------------------------------------------------|-------------------------------------------------------------------------------------------------------------------------------------------------------------------------------------------------------------------------------------------------------|---|------|
| hCoV-19/Mexico/ROO-INMEGEN-06-01-353/2021 | EPI_ISL_2616971 | B.1.1.7 | GRY | 43 | C241T,C913T,C2110T,C2143T,C3037T,G3047T,C3267T,C5388A,C5986T,C6730T,C7945T,A10195 G,C10834T,C14120T,C14408T,C14676T,C15279T,T16176C,T20445C,A23063T,C23271A,A23403 G,C23604A,C23709T,T24506G,G24914C,T27384C,C27972T,G28048T,G28075T,A28095T,A2811 G,C28236T,G28280C,A28281T,T28282A,G28307A,G28881A,G28882A,G28883C,C28896G,C28 241T,C913T,C2453T,C3037T,C3177T,C3267T,C5388A,C5986T,T6954C,C9611T,C9893T,C14408T ,C14676T,C15279T,T16176C,C21855T,G21974C,A23063T,C23271A,A23403G,C23604A,C23709T ,T24506G,G24914C,C27972T,G28048T,A28111G,G28280C,A28281T,T28282A,A28295G,C28775 T,G28881A,G28882A,G28883C,C28977T                                                                                                                                                                                                                                                                                                                                                           | N:D3L:N:A12T,N:R203K,N:G204R,N:A208G,N:S235F,ORF1a:D928Y,ORF1a:T10 01,ORF1a:A1708D,ORF1b:P218L,ORF1b:P314L,ORF8:Q27*,ORF8:R52,ORF8:R52,ORF8:K68*,ORF8:Y73C,ORF8:R115C,ORF8b:M81,S:N501Y,SA570D,SD614G,SD614G,S:P681H,S:T716I,S:S982A,S:D1118H         | 6 | 176  |
| hCoV-19/Mexico/ROO-INMEGEN-06-02-104/2021 | EPI_ISL_2692631 | B.1.1.7 | GRY | 36 | C222T,C241T,C913T,C2110T,C3037T,C3267T,C4423T,C5388A,C5986T,C6681T,T6954C,G7042T,C 9693T,A10359G,C14120T,C14408T,C14676T,C15279T,T16176C,C17762T,A23063T,C23271A,A2 3403G,C23604A,G23608T,C23709T,T24506G,G24914C,T25180C,C27972T,G28048T,A28095T,A 28111G,G28280C,A28281T,T28282A,G28881A,G28882A,G28883C,C28977T                                                                                                                                                                                                                                                                                                                                                                                                                                                                                                                                                                                                                                                              | N:D3L:N:N8D,N:P168S,N:R203K,N:G204R,N:S235F,ORF1a:L730F,ORF1a:P971 L,ORF1a:T1001,ORF1a:A1708D,ORF1a:I2230T,ORF1a:L3116F,ORF1a:L3210F, ORF1b:P314L,ORF8:Q27*,ORF8:R52,ORF8:Y73C,S:S98F,S:D138H,S:N501Y,SA 570D,SD614G,S:P681H,S:T716I,S:S982A,S:D1118H | 6 | 0    |
| hCoV-19/Mexico/ROO-INMEGEN-06-02-106/2021 | EPI_ISL_2692633 | B.1.1.7 | GRY | 40 | C241T,C913T,C1314T,C1912T,C3037T,C3177T,C3267T,C5388A,C5986T,T6954C,C10252T,C1440 8T,C14676T,C15279T,T15795C,T16176C,A23063T,C23271A,A23403G,C23604A,C23709T,T245 06G,G24914C,C27879T,C27972T,G28048T,A28111G,G28280C,A28281T,T28282A,G28881A,G28 222T,C241T,C913T,C2110T,C3037T,C3267T,C4423T,C5388A,C5986T,C6681T,T6954C,G7042T,A 10359G,C14120T,C14408T,C14676T,C15279T,T16176C,C17762T,A23063T,C23271A,A23403G,C 23604A,G23608T,C23709T,T24506G,G24914C,T25180C,C27972T,G28048T,A28095T,A28111G, G28280C,A28281T,T28282A,G28881A,G28882A,G28883C,C28977T                                                                                                                                                                                                                                                                                                                                                                                                                    | N:D3L:N:R203K,N:G204R,N:S235F,ORF1a:T1001,ORF1a:A1708D,ORF1a:A213 9V,ORF1a:I2230T,ORF1a:M2259I,ORF1a:P314L,ORF1b:P218L,ORF1b:P314L,ORF8:Q27*,ORF8:R52,ORF8:Y73C,S:N501Y,SA570D,SD614G,S:P681H,S:T716I,S:S982A,S:D1118H                                | 6 | 0    |
| hCoV-19/Mexico/ROO-INMEGEN-06-02-130/2021 | EPI_ISL_2692651 | B.1.1.7 | GRY | 34 | C241T,C913T,C1314T,C1912T,C3037T,C3177T,C3267T,C5388A,C5986T,T6954C,C10252T,C1440 8T,C14676T,C15279T,T15795C,T16176C,A23063T,C23271A,A23403G,C23604A,C23709T,T245 06G,G24914C,C27879T,C27972T,G28048T,A28111G,G28280C,A28281T,T28282A,G28881A,G28 222T,C241T,C913T,C2110T,C3037T,C3267T,C4423T,C5388A,C5986T,C6681T,T6954C,G7042T,A 10359G,C14120T,C14408T,C14676T,C15279T,T16176C,C17762T,A23063T,C23271A,A23403G,C 23604A,G23608T,C23709T,T24506G,G24914C,T25180C,C27972T,G28048T,A28095T,A28111G, G28280C,A28281T,T28282A,G28881A,G28882A,G28883C,C28977T                                                                                                                                                                                                                                                                                                                                                                                                                    | N:D3L:N:R203K,N:G204R,N:S235F,ORF1a:T350I,ORF1a:P971,ORF1a:T1001,O RF1a:A1708D,ORF1a:I2230T,ORF1b:P314L,ORF7b:H42Y,ORF8:Q27*,ORF8:R52 1,ORF8:Y73C,S:N501Y,SA570D,SD614G,S:P681H,S:T716I,S:S982A,S:D1118H                                              | 6 | 2    |
| hCoV-19/Mexico/ROO-INMEGEN-06-02-146/2021 | EPI_ISL_2692665 | B.1.1.7 | GRY | 39 | G28280C,A28281T,T28282A,G28881A,G28882A,G28883C,C28977T                                                                                                                                                                                                                                                                                                                                                                                                                                                                                                                                                                                                                                                                                                                                                                                                                                                                                                                         | N:D3L:N:R203K,N:G204R,N:S235F,ORF1a:T1001,ORF1a:A1708D,ORF1a:I2230 T,ORF1a:K335R,ORF1a:Q3966F,ORF1a:P314L,ORF1b:K338R,ORF1b:K218R ,ORF3a:P240S,ORF8:Q27*,ORF8:R52,ORF8:Y73C,S:N501Y,SA570D,SD614G, S:P681H,S:T716I,S:S982A,S:D1118H,S:K119N           | 6 | 0    |
| hCoV-19/Mexico/ROO-INMEGEN-06-02-183/2021 | EPI_ISL_2692696 | B.1.1.7 | GRY | 40 | G11G,G28280C,A28281T,T28282A,G28881A,G28882A,G28883C,C28977T,C29095T                                                                                                                                                                                                                                                                                                                                                                                                                                                                                                                                                                                                                                                                                                                                                                                                                                                                                                            | N:D3L:N:R203K,N:G204R,N:S235F,ORF1a:T1001,ORF1a:A1314V,ORF1a:A170 8D,ORF1a:I2230T,ORF1a:M2259I,ORF1a:P314L,ORF1b:P218L,ORF1b:P314L, ORF1b:A1432V,ORF8:Q27*,ORF8:R52,ORF8:Y73C,S:N501Y,SA570D,SD614G, S:P681H,S:T716I,S:S982A,S:D1118H,S:K119N         | 6 | 411  |
| hCoV-19/Mexico/ROO-INMEGEN-06-02-320/2021 | EPI_ISL_2692807 | B.1.1.7 | GRY | 37 | G28280C,A28281T,T28282A,G28881A,G28882A,G28883C,C28977T                                                                                                                                                                                                                                                                                                                                                                                                                                                                                                                                                                                                                                                                                                                                                                                                                                                                                                                         | N:D3L:N:R203K,N:G204R,N:S235F,ORF1a:T1001,ORF1a:A1708D,ORF1a:A213 9V,ORF1a:I2230T,ORF1a:M2259I,ORF1a:K3365R,ORF1b:P218L,ORF1b:P314L, ORF1b:A1432V,ORF8:Q27*,ORF8:R52,ORF8:Y73C,S:N501Y,SA570D,SD614G, S:P681H,S:T716I,S:S982A,S:D1118H                | 6 | 58   |
| hCoV-19/Mexico/ROO-INMEGEN-06-02-40/2021  | EPI_ISL_2692575 | B.1.1.7 | GRY | 33 | C241T,C913T,C2453T,C3037T,C3267T,C5388A,C5986T,T6954C,C9611T,C9893T,C14408T,C1467 6T,C15279T,T16176C,A17342G,C21855T,G21974C,C23271A,A23403G,C23604A,C23709T,T245 06G,G24914C,G25906T,C27972T,G28048T,A28111G,G28280C,A28281T,T28282A,A28295G,G2 8881A,G28882A,G28883C,C28977T                                                                                                                                                                                                                                                                                                                                                                                                                                                                                                                                                                                                                                                                                                  | N:D3L:N:N8D,N:R203K,N:G204R,N:S235F,ORF1a:L730F,ORF1a:T1001,ORF1a: A1708D,ORF1a:I2230T,ORF1a:L3116F,ORF1a:L3210F,ORF1b:P218L,ORF1b: D129Z,ORF3a:G172C,ORF8:Q27*,ORF8:R52,ORF8:Y73C,S:S98F,S:D138H,SA57 0D,SD614G,S:P681H,S:T716I,S:S982A,S:D1118H     | 6 | 21   |
| hCoV-19/Mexico/ROO-INMEGEN-06-02-58/2021  | EPI_ISL_2692591 | B.1.1.7 | GR  | 35 | C222T,C241T,C913T,C2110T,C3037T,C3267T,C5388A,C5986T,T6954C,G7042T,C8389T,C12115T, C13517T,C14120T,C14408T,C14676T,C15279T,T16176C,G16900T,C17762T,C21077T,A23063T,C 23271A,A23403G,C23604A,C23709T,T24506G,G24914C,T25180C,C25665T,G25785T,G26416T, C27972T,G28048T,A28095T,A28111G,G28280C,A28281T,T28282A,G28881A,G28882A,G28883C,C2 8977T,G28048T,A28095T,A28111G,G28280C,A28281T,T28282A,G28881A,G28882A,G28883C,C28 222T,C241T,C913T,C2110T,C3037T,C3267T,C4423T,C5388A,C5986T,C6681T,T6954C,G7042T,A 10359G,C14120T,C14408T,C14676T,C15279T,T16176C,G16207T,C17762T,A23063T,C23271A,A 23403G,C23604A,G23608T,C23709T,T24506G,G24914C,T25180C,C27972T,G28048T,A28095T, A28111G,G28280C,A28281T,T28282A,G28881A,G28882A,G28883C,C28977T                                                                                                                                                                                                                                    | N:D3L:N:R203K,N:G204R,N:S235F,ORF1a:T1001,ORF1a:A1708D,ORF1a:I2230 T,ORF1b:P314L,ORF8:Q27*,ORF8:R52,ORF8:Y73C,S:N501Y,SA570D,SD614G, S:P681H,S:T716I,S:S982A,S:D1118H                                                                                 | 6 | 2033 |
| hCoV-19/Mexico/ROO-INMEGEN-06-02-66/2021  | EPI_ISL_2692598 | B.1.1.7 | GRY | 43 | C27972T,G28048T,A28095T,A28111G,G28280C,A28281T,T28282A,G28881A,G28882A,G28883C,C2 8977T,G28048T,A28095T,A28111G,G28280C,A28281T,T28282A,G28881A,G28882A,G28883C,C28 222T,C241T,C913T,C2110T,C3037T,C3267T,C4423T,C5388A,C5986T,C6681T,T6954C,G7042T,A 10359G,C14120T,C14408T,C14676T,C15279T,T16176C,G16207T,C17762T,A23063T,C23271A,A 23403G,C23604A,G23608T,C23709T,T24506G,G24914C,T25180C,C27972T,G28048T,A28095T, A28111G,G28280C,A28281T,T28282A,G28881A,G28882A,G28883C,C28977T                                                                                                                                                                                                                                                                                                                                                                                                                                                                                         | N:D3L:N:R203K,N:G204R,N:S235F,ORF1a:T1001,ORF1a:A1314V,ORF1a:A170 8D,ORF1a:I2230T,ORF1a:M2259I,ORF1a:P314L,ORF1b:P218L,ORF1b:P314L, ORF1b:A1432V,ORF8:Q27*,ORF8:R52,ORF8:Y73C,S:N501Y,SA570D,SD614G, S:P681H,S:T716I,S:S982A,S:D1118H                 | 6 | 704  |
| hCoV-19/Mexico/ROO-INMEGEN-06-02-69/2021  | EPI_ISL_2692601 | B.1.1.7 | GRY | 40 | A28111G,G28280C,A28281T,T28282A,G28881A,G28882A,G28883C,C28977T                                                                                                                                                                                                                                                                                                                                                                                                                                                                                                                                                                                                                                                                                                                                                                                                                                                                                                                 | N:D3L:N:R203K,N:G204R,N:S235F,ORF1a:T1001,ORF1a:A1708D,ORF1a:A213 9V,ORF1a:I2230T,ORF1a:M2259I,ORF1a:K3365R,ORF1b:P218L,ORF1b:P314L, ORF1b:A914S,ORF1b:A1432V,ORF8:Q27*,ORF8:R52,ORF8:Y73C,S:N501Y,SA570D,SD614G,S:P681H,S:T716I,S:S982A,S:D1118H     | 6 | 675  |
| hCoV-19/Mexico/ROO-INMEGEN-06-02-77/2021  | EPI_ISL_2692545 | B.1.1.7 | GRY | 35 | C241T,C913T,C2453T,C3037T,C3267T,C5388A,C5986T,T6954C,C9611T,C9893T,C14408T,C1467 6T,C15279T,T16176C,C21855T,G21974C,C23271A,A23403G,C23604A,C23709T,T2450 6G,G24914C,C27972T,G28048T,A28111G,G28280C,A28281T,T28282A,A28295G,C28775T,G28 81A,G28882A,G28883C,C28977T                                                                                                                                                                                                                                                                                                                                                                                                                                                                                                                                                                                                                                                                                                           | N:D3L:N:N8D,N:P168S,N:R203K,N:G204R,N:S235F,ORF1a:L730F,ORF1a:T100 1,ORF1a:A1708D,ORF1a:I2230T,ORF1a:L3116F,ORF1a:L3210F,ORF1b:P314L, ORF8:Q27*,ORF8:R52,ORF8:Y73C,S:S98F,S:D138H,S:N501Y,SA570D,SD614G                                               | 6 | 541  |
| hCoV-19/Mexico/ROO-INMEGEN-06-02-77/2021  | EPI_ISL_2692607 | B.1.1.7 | GRY | 43 | C241T,C913T,C2110T,C2143T,C3037T,G3047T,C3267T,C5388A,C5986T,C6730T,G7042T,C7945T, A10195G,C10834T,C14120T,C14408T,C14676T,C15279T,T16176C,T20445C,A23063T,C23271A, A23403G,C23604A,C23709T,T24506G,G24914C,C27972T,G28048T,G28075T,A28095T,A2811 G,C28236T,G28280C,A28281T,T28282A,G28881A,G28882A,G28883C,C28896G,C28977T,C296 G,C241T,C913T,C3037T,C2453T,C3037T,C3267T,C5388A,C5986T,T6954C,C9611T,C9893T,C14408T ,C14676T,C15279T,T16176C,A17027T,C21855T,G21974C,A23063T,C23271A,A23403G,C23604 A,C23709T,T24506G,G24914C,C27972T,G28048T,A28111G,G28280C,A28281T,T28282A,A2829 5G,G24914C,G27467C,C27972T,G28048T,A28111G,G28280C,A28281T,T28282A,G28881A,G28 822T,C241T,C913T,C2110T,C3037T,C3267T,C4423T,C5388A,C5986T,C6681T,T6954C,G7042T, A10359G,C14120T,C14408T,C14676T,C15279T,T16176C,C17762T,A23063T,C23271A,A23403G, C23604A,G23608T,C23709T,T24506G,G24914C,T25180C,C27972T,G28048T,A28095T,A28111G, G28280C,A28281T,T28282A,G28881A,G28882A,G28883C,C28977T | N:D3L:N:R203K,N:G204R,N:S235F,ORF1a:T1001,ORF1a:A1708D,ORF1a:I2230 T,ORF1b:P314L,ORF8:Q27*,ORF8:R52,ORF8:Y73C,S:N501Y,SA570D,SD614G, S:P681H,S:T716I,S:S982A,S:D1118H                                                                                 | 6 | 120  |
| hCoV-19/Mexico/ROO-INMEGEN-06-02-82/2021  | EPI_ISL_2692612 | B.1.1.7 | GRY | 34 | G28882A,G28883C,C28977T                                                                                                                                                                                                                                                                                                                                                                                                                                                                                                                                                                                                                                                                                                                                                                                                                                                                                                                                                         | N:D3L:N:R203K,N:G204R,N:S235F,ORF1a:T1001,ORF1a:A1708D,ORF1a:I2230 T,ORF1b:P314L,ORF7b:E39*,ORF8:Q27*,ORF8:R52,ORF8:Y73C,S:A570D,SD61 4G,S:P681H,S:T716I,S:S982A,S:D1118H                                                                             | 6 | 1891 |
| hCoV-19/Mexico/ROO-INMEGEN-06-02-99/2021  | EPI_ISL_2692627 | B.1.1.7 | GRY | 43 | C23271A,A23403G,C23604A,C23709T,T24506G,G24914C,C27972T,G28048T,G28075T,A28095T, A28111G,C28236T,G28280C,A28281T,T28282A,G28881A,G28882A,G28883C,C28896G,C28977T C241T,C673T,C913T,C2453T,C3037T,C3267T,C5388A,C5986T,T6954C,C9611T,C9893T,C14408T, C14676T,C15279T,T16176C,G17027T,C21855T,G21974C,A23063T,C23271A,A23403G,C23604A ,C23709T,T24506G,G24914C,C27972T,G28048T,A28111G,G28280C,A28281T,T28282A,A28295 T,G24914C,G27467C,C27972T,G28048T,A28111G,G28280C,A28281T,T28282A,G28881A,G28 822T,C241T,C913T,C2110T,C3037T,C3267T,C4423T,C5388A,C5986T,C6681T,T6954C,G7042T, A10359G,C14120T,C14408T,C14676T,C15279T,T16176C,C17762T,A23063T,C23271A,A23403G, C23604A,G23608T,C23709T,T24506G,G24914C,T25180C,C27972T,G28048T,A28095T,A28111G, G28280C,A28281T,T28282A,G28881A,G28882A,G28883C,C28977T                                                                                                                                                                    | N:D3L:N:N8D,N:R203K,N:G204R,N:S235F,ORF1a:L730F,ORF1a:T1001,ORF1a: A1708D,ORF1a:I2230T,ORF1a:L3116F,ORF1a:L3210F,ORF1b:P314L,ORF1b: S187I,ORF8:Q27*,ORF8:R52,ORF8:Y73C,S:S98F,S:D138H,S:N501Y,SA570D,SD 614G,S:P681H,S:T716I,S:S982A,S:D1118H         | 6 | 42   |
| hCoV-19/Mexico/ROO-INMEGEN-06-03-289/2021 | EPI_ISL_2810251 | B.1.1.7 | GRY | 36 | G28881A,G28882A,G28883C,C28977T                                                                                                                                                                                                                                                                                                                                                                                                                                                                                                                                                                                                                                                                                                                                                                                                                                                                                                                                                 | N:D3L:N:N8D,N:R203K,N:G204R,N:S235F,ORF1a:L730F,ORF1a:T1001,ORF1a: A1708D,ORF1a:I2230T,ORF1a:L3116F,ORF1a:L3210F,ORF1b:P314L,ORF1b: S187I,ORF8:Q27*,ORF8:R52,ORF8:Y73C,S:S98F,S:D138H,S:N501Y,SA570D,SD 614G,S:P681H,S:T716I,S:S982A,S:D1118H         | 6 | 478  |
| hCoV-19/Mexico/ROO-INMEGEN-06-03-296/2021 | EPI_ISL_2810258 | B.1.1.7 | GR  | 56 | G28881A,G28882A,G28883C,C28977T                                                                                                                                                                                                                                                                                                                                                                                                                                                                                                                                                                                                                                                                                                                                                                                                                                                                                                                                                 | N:D3L:N:N8D,N:R203K,N:G204R,N:S235F,ORF1a:L730F,ORF1a:T1001,ORF1a: A1708D,ORF1a:I2230T,ORF1a:L3116F,ORF1a:L3210F,ORF1b:P314L,ORF1b: Q27*,ORF8:R52,ORF8:Y73C,S:S98F,S:D138H,S:A570D,SD614G,S:P681H,S:T716I,S S982A,S:D1118H                            | 6 | 436  |
| hCoV-19/Mexico/ROO-INMEGEN-06-03-320/2021 | EPI_ISL_2810278 | B.1.1.7 | GRY | 38 | A28281T,T28282A,G28881A,G28882A,G28883C,C28977T                                                                                                                                                                                                                                                                                                                                                                                                                                                                                                                                                                                                                                                                                                                                                                                                                                                                                                                                 | N:D3L:N:R203K,N:G204R,N:S235F,ORF1a:T1001,ORF1a:A1708D,ORF1a:A213 9V,ORF1a:I2230T,ORF1a:M2259I,ORF1a:K3365R,ORF1b:P218L,ORF1b:P314L, ORF1b:A1432V,ORF8:Q27*,ORF8:R52,ORF8:Y73C,S:N501Y,SA570D,SD614G, S:P681H,S:T716I,S:S982A,S:D1118H                | 6 | 12   |
| hCoV-19/Mexico/ROO-INMEGEN-06-04-14/2021  | EPI_ISL_2894164 | B.1.1.7 | GR  | 29 | O48T,A28111G,C23271A,A23403G,C23604A,C23709T,T24506G,G24914C,G27870T,C27972T,G28 241T,C673T,C913T,C2453T,C3037T,C3267T,C5388A,C5986T,T6954C,C9611T,C9893T,C14408T, C14676T,C15279T,T16176C,G17027T,C21855T,G21974C,A23063T,C23271A,A23403G,C23604 A,C23709T,T24506G,G24914C,C27972T,G28048T,A28111G,G28280C,A28281T,T28282A,A28295 G,G28881A,G28882A,G28883C,C28977T                                                                                                                                                                                                                                                                                                                                                                                                                                                                                                                                                                                                            | N:D3L:N:N8D,N:R203K,N:G204R,N:S235F,ORF1a:L730F,ORF1a:T1001,ORF1a: A1708D,ORF1a:I2230T,ORF1a:L3116F,ORF1a:L3210F,ORF1b:P314L,ORF1b: S187I,ORF8:Q27*,ORF8:R52,ORF8:Y73C,S:S98F,S:D138H,S:N501Y,SA570D,SD 614G,S:P681H,S:T716I,S:S982A,S:D1118H         | 6 | 412  |
| hCoV-19/Mexico/ROO-INMEGEN-06-04-313/2021 | EPI_ISL_2894360 | B.1.1.7 | GRY | 36 | G28881A,G28882A,G28883C,C28977T                                                                                                                                                                                                                                                                                                                                                                                                                                                                                                                                                                                                                                                                                                                                                                                                                                                                                                                                                 | N:D3L:N:R203K,N:G204R,N:S235F,ORF1a:L730F,ORF1a:T1001,ORF1a:A213 9V,ORF1a:I2230T,ORF1a:M2259I,ORF1a:K3365R,ORF1b:P218L,ORF1b:P314L, ORF1b:A1432V,ORF8:Q27*,ORF8:R52,ORF8:Y73C,S:S98F,S:D138H,S:N501Y,SA570D,SD 614G,S:P681H,S:T716I,S:S982A,S:D1118H  | 6 | 16   |

|                                           |                 |         |     |                                                                                                                                                                                                                                                                                                                                                                                                                                                     |  |  |                                                                                                                                                                                                                                                                          |   |     |
|-------------------------------------------|-----------------|---------|-----|-----------------------------------------------------------------------------------------------------------------------------------------------------------------------------------------------------------------------------------------------------------------------------------------------------------------------------------------------------------------------------------------------------------------------------------------------------|--|--|--------------------------------------------------------------------------------------------------------------------------------------------------------------------------------------------------------------------------------------------------------------------------|---|-----|
|                                           |                 |         |     | C241T,C913T,C2110T,C3037T,C3267T,C5388A,C5986T,T6954C,G7042T,A10195G,C10279T,C14120T,C14408T,C14676T,C15279T,T16176C,C16887T,G17427T,A19892G,A23063T,C23271A,A23403G,C23604A,C23709T,T24506G,G24914C,G27364T,A27943G,C27972T,G28048T,G28075T,A28111G,G28280C,A28281T,T28282A,G28881A,G28882A,G28883C,C28977T,G29977T                                                                                                                                |  |  | N:D3L,N:R203K,N:G204R,N:S235F,ORF1a:T1001,ORF1a:A1708D,ORF1a:I2230T,ORF1a:M2259,ORF1b:P218L,ORF1b:P314L,ORF1b:D2142G,ORF7a:R80L,ORF8:H17R,ORF8:Q27*,ORF8:R52I,ORF8:C61F,ORF8:K68*,ORF8:Y73C,S:N501Y,S:5A570D,S:D614G,S:P681H,S:T716I,S:S982A,S:D1118H                    | 6 | 0   |
| hCoV-19/Mexico/ROO-INMEGEN-06-04-316/2021 | EPI_ISL_2894363 | B.1.1.7 | GRY | 40 T99C,C241T,C913T,C3037T,C3267T,C5284T,C5388A,C5986T,T6954C,A9238G,C10369T,C14408T,C14676T,C15279T,T16176C,C17004T,A17615G,G20056A,A21276G,A23063T,C23271A,A23403G,C23604A,C23709T,T24506G,G24914C,C25413T,G26062T,G26065T,C27972T,G28048T,A28111G,G28280C,A28281T,T28282A,G28881A,G28882A,G28883C,C28977T,G29977T                                                                                                                                |  |  | 25 N:D3L,N:R203K,N:G204R,N:S235F,ORF1a:T1001,ORF1a:A1708D,ORF1a:I2230T,ORF1b:P314L,ORF1b:K1383R,ORF1b:G2197S,ORF3a:G224C,ORF3a:V225F,ORF8:Q27*,ORF8:R52I,ORF8:Y73C,S:N501Y,S:5A570D,S:D614G,S:P681H,S:T716I,S:S982A,S:D1118H                                             | 6 | 56  |
| hCoV-19/Mexico/ROO-INMEGEN-06-04-317/2021 | EPI_ISL_2894364 | B.1.1.7 | GRY | 40 C241T,C913T,C2110T,C2143T,C3037T,G3047T,C3267T,C5388A,C5986T,C6730T,C7945T,A10195G,G10834T,C14120T,C14408T,C14676T,C15279T,T16176C,T20445C,A23063T,C23271A,A23403G,C23604A,C23709T,T24506G,G24914C,C27972T,G28048T,G28075T,A28095T,A28111G,C28236T,G28280C,A28281T,T28282A,G28881A,G28882A,G28883C,C28977T,C29642T                                                                                                                               |  |  | 22 N:D3L,N:R203K,N:G204R,N:A208G,N:S235F,ORF1a:D928T,ORF1a:T1001,ORF1a:A1708D,ORF1b:P218L,ORF1b:P314L,ORF1b:Q27*,ORF8:R52I,ORF8:C61F,ORF8:K68*,ORF8:Y73C,ORF8:R115C,S:N501Y,S:5A570D,S:D614G,S:P681H,S:T716I,S:S982A,S:D1118H                                            | 6 | 138 |
| hCoV-19/Mexico/ROO-INMEGEN-06-04-320/2021 | EPI_ISL_2894366 | B.1.1.7 | GRY | 41 C222T,C241T,C715T,C913T,A977G,C2110T,C3037T,C3267T,C4423T,C5388A,C5986T,C6681T,T6954C,G7042T,A10359G,C14120T,C14408T,C14676T,C15279T,T16176C,C17762T,A23063T,C23271A,A23403G,C23604A,G23608T,C23709T,T24506G,G24914C,T25180C,C27972T,G28048T,A28011G,G28280C,A28281T,T28282A,G28881A,G28882A,G28883C,C28977T                                                                                                                                     |  |  | 23 N:D3L,N:R203K,N:G204R,N:S235F,ORF1a:I238V,ORF1a:T1001,ORF1a:A1708D,ORF1a:A2139V,ORF1a:I230T,ORF1a:M2259,ORF1a:K3365R,ORF1b:P218L,ORF1b:P314L,ORF1b:A1432V,ORF8:Q27*,ORF8:R52I,ORF8:K68*,ORF8:Y73C,S:N501Y,S:5A570D,S:D614G,S:P681H,S:T716I,S:S982A,S:D1118H           | 6 | 4   |
| hCoV-19/Mexico/ROO-INMEGEN-06-04-321/2021 | EPI_ISL_2894367 | B.1.1.7 | GRY | 41 C64T,C241T,C841T,C913T,C3037T,C3267T,A3946G,C5388A,C5986T,T6954C,C8320T,C1158T,C12400T,A12507G,C14408T,C14676T,C15279T,T16176C,T20733C,C21812T,A23063T,C23271A,A23403G,C23604A,C23709T,T24506G,G24914C,C25511T,C27972T,G28048T,A28111G,G28280C,A28281T,T28282A,G28881A,G28882A,G28883C,C28977T,C29732T                                                                                                                                           |  |  | 20 N:D3L,N:R203K,N:G204R,N:S235F,ORF1a:T1003,ORF1a:A1708D,ORF1a:I2230T,ORF1a:K4081R,ORF1b:P314L,ORF3a:S40L,ORF8:Q27*,ORF8:R52I,ORF8:Y73C,S:N501Y,S:5A570D,S:D614G,S:P681H,S:T716I,S:S982A,S:D1118H                                                                       | 6 | 0   |
| hCoV-19/Mexico/ROO-INMEGEN-06-04-322/2021 | EPI_ISL_2894368 | B.1.1.7 | GRY | 39 C241T,C913T,C2110T,C2143T,C3037T,G3047T,C3267T,C5388A,C5986T,C6636T,C6730T,C7945T,A10195G,C10834T,C14120T,C14408T,C14676T,C15279T,T16176C,C18458T,T20445C,A23063T,C23271A,A23403G,C23604A,C23709T,T24506G,G24914C,C27972T,G28048T,G28075T,A28095T,A28111G,C28236T,A28111G,C28236T,G28280C,A28281T,T28282A,G28881A,G28882A,G28883C,C28977T,C29642T                                                                                                |  |  | 25 OD,S:D614G,S:P681H,S:T716I,S:S982A,S:D1118H                                                                                                                                                                                                                           | 6 | 173 |
| hCoV-19/Mexico/ROO-INMEGEN-06-04-323/2021 | EPI_ISL_2894369 | B.1.1.7 | GRY | 40 C241T,C913T,A2105G,C2110T,C3037T,C3267T,C5388A,C5986T,T6954C,G7042T,A10195G,C10279T,C14120T,C14408T,C14676T,C15279T,T16176C,C16887T,G17427T,A23063T,C23271A,A23403G,C23604A,C23709T,T24506G,G24914C,C27972T,C28000T,G28048T,G28075T,A28095T,A28111G,G28280C,A28281T,T28282A,G28881A,G28882A,G28883C,C28977T                                                                                                                                      |  |  | 24 N:D3L,N:R203K,N:G204R,N:S235F,ORF1a:T614A,ORF1a:T1001,ORF1a:A1708D,ORF1a:I2230T,ORF1a:M2259,ORF1b:P218L,ORF1b:P314L,ORF1b:Q27*,ORF8:P36L,ORF8:R52I,ORF8:C61F,ORF8:K68*,ORF8:Y73C,S:N501Y,S:5A570D,S:D614G,S:P681H,S:T716I,S:S982A,S:D1118H                            | 6 | 5   |
| hCoV-19/Mexico/ROO-INMEGEN-06-04-54/2021  | EPI_ISL_2894198 | B.1.1.7 | GRY | 39 C241T,C913T,C2110T,C3037T,C3267T,C5388A,C5986T,T6954C,G7042T,C113T,A13947G,C14120T,C14408T,C14676T,C15279T,T16176C,C17762T,A23063T,T23071C,C23271A,A23403G,C23604A,C23709T,T24506G,G24914C,A25718G,G26020T,C27972T,G28048T,A28095T,A28111G,C28240T,G28280C,A28281T,T28282A,G28881A,G28882A,G28883C,C28977T,C29367T                                                                                                                               |  |  | 27 Y73C,ORF8:S103L,S:N501Y,S:5A570D,S:D614G,S:P681H,S:T716I,S:S982A,S:D1118H                                                                                                                                                                                             | 6 | 193 |
| hCoV-19/Mexico/ROO-INMEGEN-06-04-62/2021  | EPI_ISL_2894206 | B.1.1.7 | GRY | 40 C222T,C241T,C913T,A977G,C2110T,C3037T,C3267T,C4423T,C5388A,C5986T,C6681T,T6954C,G7042T,A10359G,C14120T,C14408T,C14676T,C15279T,T16176C,C17762T,C23271A,A23403G,C23604A,G23608T,C23709T,T24506G,G24914C,G25012T,T25180C,C27972T,G28048T,A28095T,A28111G,G28280C,A28281T,T28282A,G28881A,G28882A,G28883C,C28977T                                                                                                                                   |  |  | 25 N:D3L,N:R203K,N:G204R,N:S235F,ORF1a:I238V,ORF1a:T1001,ORF1a:A1708D,ORF1a:A2139V,ORF1a:I230T,ORF1a:M2259,ORF1a:K3365R,ORF1b:P218L,ORF1b:P314L,ORF1b:A1432V,ORF8:Q27*,ORF8:R52I,ORF8:K68*,ORF8:Y73C,S:N501Y,S:5A570D,S:D614G,S:P681H,S:T716I,S:S982A,S:D1118H           | 6 | 393 |
| hCoV-19/Mexico/ROO-INMEGEN-06-04-7/2021   | EPI_ISL_2894157 | B.1.1.7 | GR  | 40 C222T,C241T,C913T,C2110T,C3037T,C3267T,C5388A,C5986T,T6954C,A7933G,T9127C,C9891T,C12809T,C14120T,C14408T,C14676T,C15279T,T16176C,C23271A,A23403G,T23425C,C23604A,C23709T,C24099T,T24506G,G24914C,G27364C,C27972T,G28048T,A28111G,G28280C,A28281T,T28282A,C28291T,G28881A,G28882A,G28883C,C28977T                                                                                                                                                 |  |  | 24 N:D3L,N:R203K,N:G204R,N:S235F,ORF1a:T1001,ORF1a:A1708D,ORF1a:I2230T,ORF1a:A3209V,ORF1a:I4182F,ORF1b:P218L,ORF1b:P314L,ORF1b:V464F,ORF1b:E735D,ORF3a:P2405,ORF8:Q27*,ORF8:R52I,ORF8:K68*,ORF8:Y73C,S:5F5A570D,S:D614G,S:P681H,S:T716I,S:S982A,S:D1118H                 | 6 | 852 |
| hCoV-19/Mexico/ROO-INMEGEN-16-288/2021    | EPI_ISL_2978599 | B.1.1.7 | GR  | 38 C222T,C241T,C913T,C2110T,C3037T,C3267T,C5388A,C5986T,T6954C,A7933G,T9127C,C9891T,C12809T,C14120T,C14408T,C14676T,C15279T,T16176C,C2216A,T2717C,A23063T,C23271A,A23403G,T23425C,C23604A,C23709T,C24099T,T24506G,G24914C,A27345C,G27364C,C27972T,G28048T,A28095T,A28111G,G28280C,A28281T,T28282A,G28881A,G28882A,G28883C,C28977T                                                                                                                   |  |  | 23 N:D3L,N:R203K,N:G204R,N:S235F,ORF1a:T1001,ORF1a:A1708D,ORF1a:I2230T,ORF1a:A3209V,ORF1a:I4182F,ORF1b:P218L,ORF1b:P314L,ORF1b:V464F,ORF1b:E735D,ORF3a:P2405,ORF8:Q27*,ORF8:R52I,ORF8:K68*,ORF8:Y73C,S:5F5A570D,S:D614G,S:P681H,S:T716I,S:S982A,S:D1118H                 | 6 | 0   |
| hCoV-19/Mexico/ROO-INMEGEN-16-295/2021    | EPI_ISL_2978606 | B.1.1.7 | GRY | 43 G28048T,A28095T,A28111G,G28280C,A28281T,T28282A,C28291T,G28881A,G28882A,G28883C,C241T,C913T,C2110T,G3004T,C3037T,C3267T,C5388A,C5986T,A6823G,T6954C,G7042T,C7765T,C10789T,C14120T,C14408T,C14676T,G14857T,C15279T,G15672C,C15810T,T16176C,G20679T,T2219C,G22567T,C23271A,A23403G,C23604A,C23709T,T24506G,G24914C,C25731T,C26110T,C26735T,C27002T,C27972T,G28048T,A28095T,A28111G,G28280C,A28281T,T28282A,A28804G,G28881A,G28882A,G28883C,C28977T |  |  | 27 501Y,S:5A570D,S:D614G,S:P681H,S:T716I,S:S982A,S:D1118H                                                                                                                                                                                                                | 6 | 0   |
| hCoV-19/Mexico/ROO-INMEGEN-16-319/2021    | EPI_ISL_2978626 | B.1.1.7 | GR  | 46 C241T,C823T,C913T,T1104C,C2094T,C2453T,C3037T,C3267T,C5388A,C5986T,T6954C,C9611T,C14408T,C14676T,C15279T,T16176C,T17009C,C21855T,G21974C,A23063T,C23271A,A23403G,C23604A,C23709T,C24374T,T24506G,G24914C,C27972T,G28048T,A28111G,G28280C,A28281T,T28282A,A28295G,G28881A,G28882A,G28883C,C28977T,C29144T                                                                                                                                         |  |  | 25 N:D3L,N:N8D,N:R203K,N:G204R,N:S235F,ORF1a:I280T,ORF1a:S610L,ORF1a:730F,ORF1a:T1001,ORF1a:A1708D,ORF1a:I2230T,ORF1a:I230T,ORF1a:I3116F,ORF1b:P314L,ORF1b:I1181T,ORF8:Q27*,ORF8:R52I,ORF8:Y73C,S:S98F,S:D138H,S:N501Y,S:5A570D,S:D614G,S:P681H,S:T716I,S:S982A,S:D1118H | 6 | 0   |
| hCoV-19/Mexico/ROO-INMEGEN-16-350/2021    | EPI_ISL_2978654 | B.1.1.7 | GRY | 39 C241T,C913T,C3037T,C3267T,C5388A,C5986T,T6954C,C14408T,C14676T,C15279T,T16176C,A23063T,C23271A,A23403G,C23604A,C23709T,T24506G,G24914C,C27972T,G28048T,A28111G,G28280C,A28281T,T28282A,G28881A,G28882A,G28883C,C28977T                                                                                                                                                                                                                           |  |  | 23 N:D3L,N:N27D,N:R203K,N:G204R,N:S235F,ORF1a:T1001,ORF1a:A1708D,ORF1a:I2230T,ORF1b:P314L,ORF3a:G100C,ORF3a:V112F,ORF8:Q27*,ORF8:R52I,ORF8:Y73C,ORF9b:G38V,S:N501Y,S:5A570D,S:D614G,S:P681H,S:T716I,S:S982A,S:D1118H                                                     | 6 | 0   |
| hCoV-19/Mexico/SEARCH-101109/2021         | EPI_ISL_2329458 | B.1.1.7 | GRY | 32 C241T,C913T,C3037T,C3267T,C5388A,C5986T,T6954C,C11580T,C14408T,C14676T,C15279T,T16176C,A23063T,C23271A,A23403G,C23604A,C23709T,T24506G,G24914C,G26730C,C27972T,G28048T,A28111G,G28280C,A28281T,T28282A,G28881A,G28882A,G28883C,C28977T,G29440T                                                                                                                                                                                                   |  |  | 22 N:D3L,N:N27D,N:R203K,N:G204R,N:S235F,ORF1a:T1001,ORF1a:A1708D,ORF1a:I2230T,ORF1a:T3771T,ORF1b:P314L,ORF3a:G100C,ORF3a:V112F,ORF8:Q27*,ORF8:R52I,ORF8:Y73C,ORF9b:G38V,S:N501Y,S:5A570D,S:D614G,S:P681H,S:T716I,S:S982A,S:D1118H                                        | 6 | 0   |
| hCoV-19/Mexico/SEARCH-101405/2021         | EPI_ISL_2422818 | B.1.1.7 | GRY | 33 G149T,C241T,G347A,C913T,C3037T,C3267T,G5023A,C5388A,C5986T,T6954C,G10396T,C14408T,C14676T,C15279T,T16176C,A17615G,G20962A,C21108T,A23063T,C23271A,A23403G,C23604A,C23709T,T24506G,G24914C,G26730C,C27972T,G28048T,A28111G,G28280C,A28281T,T28282A,G28881A,G28882A,G28883C,C28977T,G29440T                                                                                                                                                        |  |  | 24 G,S:P681H,S:T716I,S:S982A,S:D1118H                                                                                                                                                                                                                                    | 6 | 0   |
| hCoV-19/Mexico/SEARCH-101440/2021         | EPI_ISL_2422832 | Q.3     | GRY | 37 C241T,C913T,C3037T,C3267T,C5388A,C5986T,T6954C,C9298T,C14408T,C14676T,C15279T,T16176C,A17153G,C19554T,G22094A,A23063T,C23271A,A23403G,C23604A,C23709T,C24374T,T24506G,G24914C,C27972T,G28048T,A28111G,G28280C,A28281T,T28282A,G28774T,G28881A,G28882A,G28883C,C28977T                                                                                                                                                                            |  |  | 22 N:D3L,N:L167F,N:R203K,N:G204R,N:S235F,ORF1a:T1001,ORF1a:A1708D,ORF1a:I2230T,ORF1b:P314L,ORF1b:Y1229C,ORF8:Q27*,ORF8:R52I,ORF8:Y73C,S:D178N,S:N501Y,S:5A570D,S:D614G,S:P681H,S:T716I,S:L938F,S:S982A,S:D1118H                                                          | 6 | 57  |
| hCoV-19/Mexico/SIN_CIAD_HJ1385/2021       | EPI_ISL_2026411 | B.1.1.7 | GRY | 34 28882A,G28883C,C28977T                                                                                                                                                                                                                                                                                                                                                                                                                           |  |  | 22 N:D3L,N:L167F,N:R203K,N:G204R,N:S235F,ORF1a:T1001,ORF1a:A1708D,ORF1a:I2230T,ORF1b:P314L,ORF1b:Y1229C,ORF8:Q27*,ORF8:R52I,ORF8:Y73C,S:D178N,S:N501Y,S:5A570D,S:D614G,S:P681H,S:T716I,S:L938F,S:S982A,S:D1118H                                                          | 6 | 0   |
| hCoV-19/Mexico/SIN_CIAD_HJ1490/2021       | EPI_ISL_2026413 | B.1.1.7 | GRY | 34 C241T,C913T,C3037T,C3267T,C5388A,C5986T,T6954C,C9298T,C14408T,C14676T,C15279T,T16176C,A17153G,C19554T,G22094A,A23063T,C23271A,A23403G,C23604A,C23709T,C24374T,T24506G,G24914C,C27972T,G28048T,A28111G,G28280C,A28281T,T28282A,G28774T,G28881A,G28882A,G28883C,C28977T                                                                                                                                                                            |  |  | 22 N:D3L,N:L167F,N:R203K,N:G204R,N:S235F,ORF1a:T1001,ORF1a:A1708D,ORF1a:I2230T,ORF1b:P314L,ORF1b:Y1229C,ORF8:Q27*,ORF8:R52I,ORF8:Y73C,S:D178N,S:N501Y,S:5A570D,S:D614G,S:P681H,S:T716I,S:L938F,S:S982A,S:D1118H                                                          | 6 | 0   |
| hCoV-19/Mexico/SIN_CIAD_HJ1500/2021       | EPI_ISL_2026415 | B.1.1.7 | GRY | 34 28882A,G28883C,C28977T                                                                                                                                                                                                                                                                                                                                                                                                                           |  |  | 22 N:D3L,N:L167F,N:R203K,N:G204R,N:S235F,ORF1a:T1001,ORF1a:A1708D,ORF1a:I2230T,ORF1b:P314L,ORF1b:Y1229C,ORF8:Q27*,ORF8:R52I,ORF8:Y73C,S:D178N,S:N501Y,S:5A570D,S:D614G,S:P681H,S:T716I,S:L938F,S:S982A,S:D1118H                                                          | 6 | 0   |



|                                             |                 |         |     |    |                                                                                                                                                                                                                                                                                                                                                                                                       |                                                                                                                                                                                                                                                                                                               |    |      |
|---------------------------------------------|-----------------|---------|-----|----|-------------------------------------------------------------------------------------------------------------------------------------------------------------------------------------------------------------------------------------------------------------------------------------------------------------------------------------------------------------------------------------------------------|---------------------------------------------------------------------------------------------------------------------------------------------------------------------------------------------------------------------------------------------------------------------------------------------------------------|----|------|
| hCoV-19/Mexico/SIN_C1AD_HJ1512/2021         | EPI_ISL_2026417 | B.1.1.7 | GRY | 34 | C241T,C913T,C3037T,C3267T,C5388A,C5986T,T6954C,C9298T,C14408T,C14676T,C15279T,T16176C,A17153G,C19554T,A23063T,C23271A,A23403G,C23604A,C23709T,C24374T,T24506G,G24914C,C27972T,G28048T,A28111G,G28280C,A28281T,T28282A,G28274T,G28881A,G28882A,G28883C,C28977T                                                                                                                                         | N:D3L,N:L167F,N:R203K,N:G204R,N:S235F,ORF1a:T1001,ORF1a:A1708D,ORF1a:I2230T,ORF1b:P314L,ORF1b:Y1229C,ORF8:Q27*,ORF8:R52I,ORF8:Y73C,S:D178N,S:N501Y,S:A570D,S:D614G,S:P681H,S:T716I,S:L938F,S:S982A,S:D1118H                                                                                                   | 6  | 156  |
| hCoV-19/Mexico/SIN_C1AD_HJ1592/2021         | EPI_ISL_2249239 | B.1.1.7 | GRY | 33 | C241T,C913T,C2453T,C3037T,C3267T,C5388A,T6954C,C9611T,C14408T,C14676T,C15279T,T16176C,C21855T,G21974C,A23063T,C23271A,A23403G,C23604A,C23709T,T24506G,G24914C,G25273T,C27972T,G28048T,A28111G,G28280C,A28281T,T28282A,A28295G,G28881A,G28882A,G28883C,C28977T                                                                                                                                         | N:D3L,N:N8D,N:R203K,N:G204R,N:S235F,ORF1a:I2230T,ORF1a:L730F,ORF1a:T1001,ORF1a:A1708D,ORF1a:I2230T,ORF1a:L3116F,ORF1b:P314L,ORF8:Q27*,ORF8:R52I,O RF8:Y73C,S:S98F,S:D138H,S:N501Y,S:A570D,S:D614G,S:P681H,S:T716I,S:S982A,S:D1118H,S:M1237I                                                                   | 24 | 462  |
| hCoV-19/Mexico/SIN_C1AD_HJ1599/2021         | EPI_ISL_2249241 | B.1.1.7 | GRY | 36 | C241T,C913T,C3037T,C3267T,C5388A,C5986T,G6421T,T6954C,T7204C,C9298T,C14408T,C14676T,C15279T,T16176C,A17153G,C19554T,G22094A,A23063T,C23271A,A23403G,C23604A,C23709T,C24374T,T24506G,G24914C,C27972T,G28048T,A28111G,G28280C,A28281T,T28282A,G28274T,G28881A,G28882A,G28883C,C28977T                                                                                                                   | N:D3L,N:L167F,N:R203K,N:G204R,N:S235F,ORF1a:T1001,ORF1a:A1708D,ORF1a:I2230T,ORF1b:P314L,ORF1b:Y1229C,ORF8:Q27*,ORF8:R52I,ORF8:Y73C,S:D178N,S:N501Y,S:A570D,S:D614G,S:P681H,S:T716I,S:L938F,S:S982A,S:D1118H                                                                                                   | 22 | 0    |
| hCoV-19/Mexico/SIN_C1AD_HJ1602/2021         | EPI_ISL_2249242 | B.1.1.7 | GRY | 20 | C241T,C913T,C3037T,C3267T,C5388A,C5986T,T6954C,C10748T,C14408T,C14649T,C14676T,C15279T,T16176C,C18348T,A28111G,G28280C,G28881A,G28882A,G28883C,G28908T,C241T,C913T,C3037T,C3267T,C5388A,C5986T,T6954C,C10748T,C14408T,C14649T,C14676T,C15279T,T16176C,C18348T,A23063T,C23271A,A23403G,C23604A,C23709T,T24506G,G24914C,C27972T,G28048T,A28111G,G28280C,A28281T,T28282A,G28881A,G28882A,G28883C,G28908T | N:D3L,N:R203K,N:G204R,N:G212V,N:S235F,ORF1a:T1001,ORF1a:A1708D,ORF1a:I2230T,ORF1a:L3495F,ORF1b:P314L,ORF8:Q27*,ORF8:R52I,ORF8:Y73C,S:N501Y,S:A570D,S:D614G,S:P681H,S:T716I,S:S982A,S:D1118H                                                                                                                   | 20 | 11   |
| hCoV-19/Mexico/SIN_C1AD_HJ1603/2021         | EPI_ISL_2249243 | B.1.1.7 | GRY | 32 | C241T,C913T,C3037T,C3267T,C5388A,C5986T,T6954C,C10748T,C14408T,C14649T,C14676T,C15279T,T16176C,C18348T,A23063T,C23271A,A23403G,C23604A,C23709T,T24506G,G24914C,C27972T,G28048T,A28111G,G28280C,A28281T,T28282A,G28881A,G28882A,G28883C,G28908T                                                                                                                                                        | N:D3L,N:R203K,N:G204R,N:G212V,N:S235F,ORF1a:T1001,ORF1a:A1708D,ORF1a:I2230T,ORF1a:L3495F,ORF1b:P314L,ORF8:Q27*,ORF8:R52I,ORF8:Y73C,S:N501Y,S:A570D,S:D614G,S:P681H,S:T716I,S:S982A,S:D1118H                                                                                                                   | 20 | 1    |
| hCoV-19/Mexico/SIN_C1AD_HJ1616/2021         | EPI_ISL_2249254 | B.1.1.7 | GRY | 38 | C241T,C913T,C3037T,C3267T,C5388A,C5986T,T6954C,C9298T,C14408T,C14676T,C15279T,T16176C,A17153G,C19554T,G22094A,A23063T,C23271A,A23403G,C23604A,C23709T,C24374T,T24506G,G24914C,C27972T,G28048T,A28111G,G28280C,A28281T,T28282A,G28274T,G28881A,G28882A,G28883C,C28977T                                                                                                                                 | N:D3L,N:L167F,N:R203K,N:G204R,N:S235F,ORF1a:T1001,ORF1a:A1708D,ORF1a:I2230T,ORF1b:P314L,ORF1b:Y1229C,ORF8:Q27*,ORF8:R52I,ORF8:Y73C,S:D178N,S:N501Y,S:A570D,S:D614G,S:P681H,S:T716I,S:L938F,S:S982A,S:D1118H                                                                                                   | 23 | 2    |
| hCoV-19/Mexico/SIN_C1AD_I2D302/2021         | EPI_ISL_2249234 | B.1.1.7 | GRY | 33 | C241T,C913T,C3037T,C3267T,T4861C,C5388A,C5986T,T6954C,C9166T,C9611T,T11288A,G11291A,T11296G,C14408T,C14676T,C15279T,T16176C,C18387T,A21766C,C21767T,A21768C,G21770A,C21855T,T21992G,A21993T,A23063T,C23271A,A23403G,C23604A,C23709T,T24506G,G24914C,T27215C,C27643T,C27972T,G28048T,A28111G,G28280C,A28281T,T28282A,A28295G,G28881A,G28882A,G28883C,C28977T                                           | N:D3L,N:N8D,N:R203K,N:G204R,N:S235F,ORF1a:L730F,ORF1a:T1001,ORF1a:G1331C,ORF1a:L507P,ORF1a:A1708D,ORF1a:I2230T,ORF1a:L3110S,ORF1b:P314L,ORF8:Q27*,ORF8:R52I,ORF8:Y73C,S:S98F,S:N501Y,S:A570D,S:D614G,S:P681H,S:T716I,S:S982A,S:D1118H,S:M1237I                                                                | 25 | 2864 |
| hCoV-19/Mexico/SIN_C1AD_S6572/2021          | EPI_ISL_2026422 | B.1.1.7 | GR  | 38 | C241T,C913T,C3037T,C3267T,G5023A,C5388A,C5986T,G6539T,T6954C,G10396T,C14117T,C14408T,C14676T,C15279T,T16176C,A17153G,G20962A,A23063T,C23271A,A23403G,C23604A,C23709T,T24506G,G24914C,G26730C,C27972T,G28048T,A28111G,G28280C,A28281T,T28282A,G2881A,G28882A,G28883C,T28902C,C28977T                                                                                                                   | M:V70L,N:D3L,N:R203K,N:G204R,N:M210T,N:S235F,ORF1a:T1001,ORF1a:M1586I,ORF1a:A1708D,ORF1a:H2092Y,ORF1a:I2230T,ORF1b:T217M,ORF1b:P314L,ORF1b:K1383R,ORF1b:D2499N,ORF8:Q27*,ORF8:R52I,ORF8:Y73C                                                                                                                  | 18 | 0    |
| hCoV-19/Mexico/SIN_C1AD_S6600/2021          | EPI_ISL_2026432 | Q.3     | GR  | 36 | 8881A,G28882A,G28883C,T28902C,C28977T                                                                                                                                                                                                                                                                                                                                                                 | N:D3L,N:N8D,N:R203K,N:G204R,N:S235F,ORF1a:L730F,ORF1a:T1001,ORF1a:A1708D,ORF1a:I2230T,ORF1a:L3116F,ORF1b:P314L,ORF1b:A53675T,ORF1a:G36765,ORF1a:F3677L,ORF1b:P314L,ORF1b:V5A,ORF1b:F84S,ORF8:Q27*,ORF8:R52I,ORF8:Y73C,C,S:H695,S:V70I,S:S98F,S:Y144V,S:N501Y,S:A570D,S:D614G,S:P681H,S:T716I,S:5982A,S:D1118H | 30 | 43   |
| hCoV-19/Mexico/SIN_C1AD_S6625/2021          | EPI_ISL_2026420 | B.1.1.7 | GR  | 46 | 5G,G28881A,G28882A,G28883C,C28977T                                                                                                                                                                                                                                                                                                                                                                    | N:D3L,N:N8D,N:R203K,N:G204R,N:S235F,ORF1a:L730F,ORF1a:T1001,ORF1a:A1708D,ORF1a:I2230T,ORF1a:L3116F,ORF1b:P314L,ORF1b:A53675T,ORF1a:G36765,ORF1a:F3677L,ORF1b:P314L,ORF1b:V5A,ORF1b:F84S,ORF8:Q27*,ORF8:R52I,ORF8:Y73C,C,S:H695,S:V70I,S:S98F,S:Y144V,S:N501Y,S:A570D,S:D614G,S:P681H,S:T716I,S:5982A,S:D1118H | 30 | 43   |
| hCoV-19/Mexico/SIN_C1AD_S6643/2021          | EPI_ISL_2026418 | B.1.1.7 | GRY | 36 | 95G,G28881A,G28882A,G28883C,C28977T                                                                                                                                                                                                                                                                                                                                                                   | N:D3L,N:N8D,N:R203K,N:G204R,N:S235F,ORF1a:L730F,ORF1a:T1001,ORF1a:A1708D,ORF1a:I2230T,ORF1a:L3116F,ORF1b:P314L,ORF1b:A53675T,ORF1a:G36765,ORF1a:F3677L,ORF1b:P314L,ORF1b:V5A,ORF1b:F84S,ORF8:Q27*,ORF8:R52I,ORF8:Y73C,S:H695,S:V70I,S:S98F,S:Y144V,S:N501Y,S:A570D,S:D614G,S:P681H,S:T716I,S:5982A,S:D1118H   | 24 | 33   |
| hCoV-19/Mexico/SIN_C1AD_S6662/2021          | EPI_ISL_2249230 | B.1.1.7 | GRY | 36 | 295G,G28881A,G28882A,G28883C,C28977T                                                                                                                                                                                                                                                                                                                                                                  | N:D3L,N:N8D,N:R203K,N:G204R,N:S235F,ORF1a:L730F,ORF1a:T1001,ORF1a:A1708D,ORF1a:I2230T,ORF1a:L3116F,ORF1b:P314L,ORF1b:A53675T,ORF1a:G36765,ORF1a:F3677L,ORF1b:P314L,ORF1b:V5A,ORF1b:F84S,ORF8:Q27*,ORF8:R52I,ORF8:Y73C,S:H695,S:V70I,S:S98F,S:Y144V,S:N501Y,S:A570D,S:D614G,S:P681H,S:T716I,S:5982A,S:D1118H   | 6  | 0    |
| hCoV-19/Mexico/SIN_C1AD_S6698/2021          | EPI_ISL_2249236 | B.1.1.7 | GRY | 36 | 8878C,G28881A,G28882A,G28883C,C28977T                                                                                                                                                                                                                                                                                                                                                                 | N:D3L,N:N8D,N:R203K,N:G204R,N:S235F,ORF1a:L730F,ORF1a:T1001,ORF1a:A1708D,ORF1a:I2230T,ORF1a:L3116F,ORF1b:P314L,ORF1b:A53675T,ORF1a:G36765,ORF1a:F3677L,ORF1b:P314L,ORF1b:V5A,ORF1b:F84S,ORF8:Q27*,ORF8:R52I,ORF8:Y73C,S:H695,S:V70I,S:S98F,S:Y144V,S:N501Y,S:A570D,S:D614G,S:P681H,S:T716I,S:5982A,S:D1118H   | 24 | 82   |
| hCoV-19/Mexico/SIN_C1AD_S6699/2021          | EPI_ISL_2277642 | B.1.1.7 | GRY | 36 | 8878C,G28881A,G28882A,G28883C,C28977T                                                                                                                                                                                                                                                                                                                                                                 | N:D3L,N:N8D,N:R203K,N:G204R,N:S235F,ORF1a:L730F,ORF1a:T1001,ORF1a:A1708D,ORF1a:I2230T,ORF1a:L3116F,ORF1b:P314L,ORF1b:A53675T,ORF1a:G36765,ORF1a:F3677L,ORF1b:P314L,ORF1b:V5A,ORF1b:F84S,ORF8:Q27*,ORF8:R52I,ORF8:Y73C,S:H695,S:V70I,S:S98F,S:Y144V,S:N501Y,S:A570D,S:D614G,S:P681H,S:T716I,S:5982A,S:D1118H   | 24 | 48   |
| hCoV-19/Mexico/SIN_C1AD_S6706/2021          | EPI_ISL_2249240 | B.1.1.7 | GRY | 36 | 774T,G28881A,G28882A,G28883C,C28977T                                                                                                                                                                                                                                                                                                                                                                  | N:D3L,N:L167F,N:R203K,N:G204R,N:S235F,ORF1a:T1001,ORF1a:A1708D,ORF1a:I2230T,ORF1b:P314L,ORF1b:Y1229C,ORF8:Q27*,ORF8:R52I,ORF8:Y73C,S:D178N,S:N501Y,S:A570D,S:D614G,S:P681H,S:T716I,S:L938F,S:S982A,S:D1118H                                                                                                   | 22 | 1    |
| hCoV-19/Mexico/SIN_C1AD_S6741/2021          | EPI_ISL_2249251 | B.1.1.7 | GRY | 40 | A28295G,A28877T,G28878C,G28881A,G28882A,G28883C,C28977T,A29796T                                                                                                                                                                                                                                                                                                                                       | N:D3L,N:N8D,N:R203K,N:G204R,N:S235F,ORF1a:H83Y,ORF1a:L730F,ORF1a:E754D,ORF1a:T1001,ORF1a:T1242I,ORF1a:A1708D,ORF1a:I2230T,ORF1a:L3116F,ORF1b:P314L,ORF1b:V5A,ORF1b:F84S,ORF8:Q27*,ORF8:R52I,ORF8:Y73C,S:S98F,S:D138H,S:N501Y,S:A570D,S:D614G,S:P681H,S:T716I,S:S982A,S:D1118H,S:M1237I                        | 27 | 50   |
| hCoV-19/Mexico/SIN-InDRE_FB14031_S2069/2021 | EPI_ISL_2283709 | B.1.1.7 | GRY | 21 | 7972T,G28048T,A28111G,G28280C,A28281T,T28282A,G28881A,G28882A,G28883C,C28977T                                                                                                                                                                                                                                                                                                                         | N:D3L,N:R203K,N:G204R,N:S235F,ORF1a:T1001,ORF1a:N1076S,ORF1a:A1708D,ORF1a:I2230T,ORF1b:P314L,ORF8:Q27*,ORF8:R52I,ORF8:Y73C,S:P26H,S:N501Y,S:A570D,S:D614G,S:P681H,S:T716I,S:L938F,S:S982A,S:D1118H                                                                                                            | 21 | 0    |
| hCoV-19/Mexico/SIN-InDRE_FB14032_S2070/2021 | EPI_ISL_2283710 | B.1.1.7 | GRY | 31 | 7972T,G28048T,A28111G,G28280C,A28281T,T28282A,G28881A,G28882A,G28883C,C28977T                                                                                                                                                                                                                                                                                                                         | N:D3L,N:R203K,N:G204R,N:S235F,ORF1a:T1001,ORF1a:A1708D,ORF1a:I2230T,ORF1b:P314L,ORF1b:Y1229C,ORF8:Q27*,ORF8:R52I,ORF8:Y73C,S:P26H,S:N501Y,S:A570D,S:D614G,S:P681H,S:T716I,S:L938F,S:S982A,S:D1118H                                                                                                            | 6  | 0    |
| hCoV-19/Mexico/SIN-InDRE_FB14033_S1757/2021 | EPI_ISL_2101896 | B.1.1.7 | GRY | 37 | 7476T,C27972T,G28048T,A28095T,A28111G,G28280C,A28281T,T28282A,G28881A,G28882A,G28883C,C28977T                                                                                                                                                                                                                                                                                                         | M:F28L,N:D3L,N:R203K,N:G204R,N:S235F,ORF1a:T760I,ORF1a:T1001,ORF1a:A1708D,ORF1a:I2230T,ORF1a:L4182F,ORF1b:P314L,ORF1b:A1708D,ORF1b:P314L,ORF8:Q27*,ORF8:R52I,ORF8:Y73C,S:N501Y,S:A570D,S:D614G,S:P681H,S:T716I,S:S982A,S:D1118H                                                                               | 23 | 7    |
| hCoV-19/Mexico/SIN-InDRE_FB15070_S2058/2021 | EPI_ISL_2283700 | B.1.1.7 | GRY | 37 | 281T,T28282A,G28881A,G28882A,G28883C,C28977T                                                                                                                                                                                                                                                                                                                                                          |                                                                                                                                                                                                                                                                                                               | 6  | 0    |

|                                             |                 |         |     |                                                                                                                                                                                                                                                                                                     |                                                                                                                                                                                                                                                                                                                                                                                                                                                                                 |  |                                                                                                                                                                                                                   |  |  |
|---------------------------------------------|-----------------|---------|-----|-----------------------------------------------------------------------------------------------------------------------------------------------------------------------------------------------------------------------------------------------------------------------------------------------------|---------------------------------------------------------------------------------------------------------------------------------------------------------------------------------------------------------------------------------------------------------------------------------------------------------------------------------------------------------------------------------------------------------------------------------------------------------------------------------|--|-------------------------------------------------------------------------------------------------------------------------------------------------------------------------------------------------------------------|--|--|
|                                             |                 |         |     | C241T,C913T,C2453T,G2967A,C3037T,C3267T,C5388A,C5986T,T6954C,C9611T,C12415T,C14408T,C14676T,C15279T,T16176C,G20580A,C21855T,G21974C,A23063T,C23271A,A23403G,C23604A,C23709T,T24506G,G24914C,G27972T,G28048T,A28111G,G28280C,A28281T,T28282A,A28295G,C28977T,G28882A,G28883C,C28977T,G29862T,A29866C |                                                                                                                                                                                                                                                                                                                                                                                                                                                                                 |  | N:D3L:N:N80,N:R203K,N:G204R,N:S235F,ORF1a:1730F,ORF1a:5901N,ORF1a:T1001,ORF1a:A1708D,ORF1a:I2230T,ORF1a:L3116F,ORF1b:P314L,ORF8:Q27*,ORF8:R52I,ORF8:Y73C,S:N501Y,S:A570D,S:D614G,S:P681H,S:T716I,S:S982A,S:D1118H |  |  |
| hCoV-19/Mexico/SIN-INdRE_FB15071_S2059/2021 | EPI_ISL_2283701 | B.1.1.7 | GRY | 24                                                                                                                                                                                                                                                                                                  | 241T,C913T,C2453T,C3037T,C3267T,C5388A,C5986T,T6954C,C9611T,C12415T,C14408T,C14676T,C15279T,T16176C,G20580A,C21855T,G21974C,A23063T,C23271A,A23403G,C23604A,C23709T,T24506G,G24914C,G27972T,G28048T,A28111G,G28280C,A28281T,T28282A,A28295G,C28977T,G28882A,G28883C,C28977T                                                                                                                                                                                                     |  |                                                                                                                                                                                                                   |  |  |
| hCoV-19/Mexico/SIN-INdRE_FB15074_S2060/2021 | EPI_ISL_2283702 | B.1.1.7 | GRY | 23                                                                                                                                                                                                                                                                                                  | 241T,C913T,C3037T,C3267T,C5388A,C5986T,T6954C,C8950T,C14408T,C14676T,C15279T,T16176C,C19524T,C12324T,C21575T,A23063T,C23271A,A23403G,C23604A,C23709T,T24506G,G24914C,G25336C,G25337C,C27972T,G28048T,A28111G,G28280C,A28281T,T28282A,G2881A,G28882A,G28883C,C28977T,T29524C                                                                                                                                                                                                     |  |                                                                                                                                                                                                                   |  |  |
| hCoV-19/Mexico/SIN-INdRE_FB15075_S2061/2021 | EPI_ISL_2283703 | B.1.1.7 | GRY | 22                                                                                                                                                                                                                                                                                                  | 241T,C913T,G1306T,C3037T,C3267T,A3492G,C5388A,C5986T,G6901A,T6954C,C14408T,C14676T,C15279T,T16176C,C21639A,G22801T,A23063T,C23271A,A23403G,C23604A,C23709T,C24374T,T24506G,G24914C,A25336C,A25998G,C27972T,G28048T,A28111G,G28280C,A28281T,T28282A,G2881A,G28882A,G28883C,C28977T                                                                                                                                                                                               |  |                                                                                                                                                                                                                   |  |  |
| hCoV-19/Mexico/SIN-INdRE_FB16917_S3067/2021 | EPI_ISL_2663333 | B.1.1.7 | GRY | 23                                                                                                                                                                                                                                                                                                  | 241T,C706T,C913T,C3037T,C3267T,A3492G,C5388A,C5986T,T6954C,C10834T,C14408T,C14676T,C15279T,T16176C,C21639A,C21846T,A23063T,C23271A,A23403G,C23604A,C23709T,C24374T,T24506G,G24914C,A25164T,C27972T,G28048T,A28111G,G28280C,A28281T,T28282A,G2881A,G28882A,G28883C,C28977T                                                                                                                                                                                                       |  |                                                                                                                                                                                                                   |  |  |
| hCoV-19/Mexico/SIN-INdRE_FB16918_S3068/2021 | EPI_ISL_2663334 | B.1.1.7 | GRY | 35                                                                                                                                                                                                                                                                                                  | 241T,C706T,C913T,C3037T,C3267T,A3492G,C5388A,C5986T,T6954C,C10834T,C14408T,C14676T,C15279T,T16176C,C21639A,C21846T,A23063T,C23271A,A23403G,C23604A,C23709T,C24374T,T24506G,G24914C,A25164T,C27972T,G28048T,A28111G,G28280C,A28281T,T28282A,G2881A,G28882A,G28883C,C28977T                                                                                                                                                                                                       |  |                                                                                                                                                                                                                   |  |  |
| hCoV-19/Mexico/SIN-INdRE_FB17388_S3483/2021 | EPI_ISL_2778998 | B.1.1.7 | GRY | 35                                                                                                                                                                                                                                                                                                  | 241T,C913T,C3037T,C3267T,C5388A,C5986T,C6525T,T6954C,C9298T,A10807G,G13385T,C14408T,C14676T,C15279T,T16176C,A18802G,A23063T,C23271A,A23403G,C23604A,C23709T,C24374T,T24506G,G24914C,G25336C,G25337C,T26486C,C27972T,G28048T,A28111G,G28280C,A28281T,T28282A,G2881A,G28882A,G28883C,C28977T                                                                                                                                                                                      |  |                                                                                                                                                                                                                   |  |  |
| hCoV-19/Mexico/SIN-INdRE_FB17473_S3490/2021 | EPI_ISL_2779005 | B.1.1.7 | GRY | 38                                                                                                                                                                                                                                                                                                  | 241T,C913T,C3037T,C3267T,C5388A,C5986T,T6954C,C9298T,A10807G,G13385T,C14408T,C14676T,C15279T,T16176C,C21639A,C23063T,C23271A,A23403G,C23604A,C23709T,C24374T,T24506G,G24914C,A25336C,G25337C,T26486C,C27972T,G28048T,A28111G,G28280C,A28281T,T28282A,G2881A,G28882A,G28883C,C28977T                                                                                                                                                                                             |  |                                                                                                                                                                                                                   |  |  |
| hCoV-19/Mexico/SIN-INdRE_FB17477_S3491/2021 | EPI_ISL_2779006 | B.1.1.7 | GRY | 39                                                                                                                                                                                                                                                                                                  | 241T,C913T,C3037T,C3267T,C5388A,C5986T,T6954C,C10332T,C14408T,C14676T,C15279T,T16176C,C21639A,C23063T,C23271A,A23403G,C23604A,C23709T,C24374T,T24506G,G24914C,A25164T,A25336C,G25337C,T26486C,C27972T,G28048T,A28111G,G28280C,A28281T,T28282A,G2881A,G28882A,G28883C,C28977T                                                                                                                                                                                                    |  |                                                                                                                                                                                                                   |  |  |
| hCoV-19/Mexico/SIN-INdRE_FB17478_S3492/2021 | EPI_ISL_2779007 | B.1.1.7 | GRY | 35                                                                                                                                                                                                                                                                                                  | 241T,C913T,C3037T,C3267T,C5388A,C5986T,T6954C,C9298T,A10807G,G13385T,C14408T,C14676T,C15279T,T16176C,C21855T,G21974C,A23063T,C23271A,A23403G,C23604A,C23709T,T24506G,G24914C,G25273T,C27972T,G28048T,A28111G,G28280C,A28281T,T28282A,A28295G,G2881A,G28882A,G28883C,C28977T                                                                                                                                                                                                     |  |                                                                                                                                                                                                                   |  |  |
| hCoV-19/Mexico/SIN-INdRE_FB18120_S3959/2021 | EPI_ISL_2858973 | B.1.1.7 | GRY | 35                                                                                                                                                                                                                                                                                                  | 241T,C913T,C3037T,C3267T,C5388A,C5986T,T6954C,C14408T,C14676T,C15279T,T16176C,G1977T,A23063T,C23271A,A23403G,C23604A,C23709T,T24506G,G24914C,G25273T,C27972T,G28048T,A28111G,G28280C,A28281T,T28282A,A28295G,G2881A,G28882A,G28883C,C28977T                                                                                                                                                                                                                                     |  |                                                                                                                                                                                                                   |  |  |
| hCoV-19/Mexico/SIN-INdRE_FB19379_S4505/2021 | EPI_ISL_3033359 | B.1.1.7 | GRY | 32                                                                                                                                                                                                                                                                                                  | 27972T,G28048T,A28111G,G28280C,A28281T,T28282A,G2881A,G28882A,G28883C,C28977T,C241T,C913T,C3037T,C3267T,A3492G,C5388A,C5986T,T6954C,T1186C,C14408T,C14676T,C15279T,T16176C,C21639A,C23063T,C23271A,A23403G,C23604A,C23709T,T24506G,G24914C,G25273T,C27972T,G28048T,A28111G,G28280C,A28281T,T28282A,A28295G,G2881A,G28882A,G28883C,C28977T                                                                                                                                       |  |                                                                                                                                                                                                                   |  |  |
| hCoV-19/Mexico/SIN-INdRE_FB19380_S4506/2021 | EPI_ISL_3033360 | B.1.1.7 | GRY | 30                                                                                                                                                                                                                                                                                                  | 241T,C913T,C3037T,C3267T,C5388A,C5986T,T6954C,C10332T,C14408T,C14676T,C15279T,T16176C,C21639A,C23063T,C23271A,A23403G,C23604A,C23709T,C24374T,T24506G,G24914C,G25273T,C27972T,G28048T,A28111G,G28280C,A28281T,T28282A,A28295G,G2881A,G28882A,G28883C,C28977T                                                                                                                                                                                                                    |  |                                                                                                                                                                                                                   |  |  |
| hCoV-19/Mexico/SLP-INdRE_FB16030_S2429/2021 | EPI_ISL_2455953 | B.1.1.7 | GRY | 40                                                                                                                                                                                                                                                                                                  | 241T,C751T,C913T,C2110T,C3037T,C3267T,C5388A,C5986T,T6954C,G7042T,G9929A,A10195G,C14120T,C14408T,C14676T,C15279T,T16176C,A23063T,C23271A,A23403G,C23604A,C23709T,T24506G,G24914C,G25336C,G25855T,A27745G,C27762T,C27972T,G28048T,G28048T,A28111G,G28280C,A28281T,T28282A,G2881A,G28882A,G28883C,C28977T                                                                                                                                                                         |  |                                                                                                                                                                                                                   |  |  |
| hCoV-19/Mexico/SLP-INdRE_FB16823_S2780/2021 | EPI_ISL_2533806 | B.1.1.7 | GRY | 36                                                                                                                                                                                                                                                                                                  | 241T,G896A,C913T,C3037T,C3267T,C5388A,C5986T,C6706T,T6954C,C10279T,C12295T,C14408T,C14676T,C15279T,T16176C,C16468T,C16887T,A17615G,G18891T,A23063T,C23271A,A23403G,C23604A,C23709T,T24506G,G24914C,C25904T,G27703T,C27972T,G28048T,A28111G,G28280C,A28281T,T28282A,G2881A,G28882A,G28883C,C28977T,C29409T                                                                                                                                                                       |  |                                                                                                                                                                                                                   |  |  |
| hCoV-19/Mexico/SLP-INdRE_FB18337_S3973/2021 | EPI_ISL_2858987 | B.1.1.7 | GRY | 39                                                                                                                                                                                                                                                                                                  | 241T,G896A,C913T,C3037T,C3267T,C5388A,C5986T,C6706T,T6954C,C10279T,C12295T,C14408T,C14676T,C15279T,T16176C,C16468T,C16887T,A17615G,G18891T,A23063T,C23271A,A23403G,C23604A,C23709T,T24506G,G24914C,A25336C,C25904T,G27703T,C27972T,G28048T,A28111G,G28280C,A28281T,T28282A,G2881A,G28882A,G28883C,C28977T,C29409T                                                                                                                                                               |  |                                                                                                                                                                                                                   |  |  |
| hCoV-19/Mexico/SLP-INdRE_FB18338_S3974/2021 | EPI_ISL_2858988 | B.1.1.7 | GRY | 40                                                                                                                                                                                                                                                                                                  | 241T,C913T,C2110T,C3037T,C3267T,C5388A,C5986T,C6120T,T6954C,G7042T,A10195G,C14120T,C14408T,C14676T,C15279T,C15933T,T16176C,C21597T,A23063T,C23271A,A23403G,C23604A,C23709T,T24506G,G24914C,A25336C,G25855T,A27745G,C27762T,C27972T,G28048T,G28048T,A28111G,G28280C,A28281T,T28282A,G2881A,G28882A,G28883C,C28977T                                                                                                                                                               |  |                                                                                                                                                                                                                   |  |  |
| hCoV-19/Mexico/SLP-INdRE_FB18343_S3975/2021 | EPI_ISL_2858989 | B.1.1.7 | GRY | 40                                                                                                                                                                                                                                                                                                  | 241T,C906T,C913T,C2147A,C3037T,C3267T,A5111G,C5388A,C5986T,T6954C,A12162G,C14408T,C14676T,C15279T,C15720T,G16122T,T16176C,A17615G,G20578T,A21137G,A23063T,C23271A,A23403G,C23604A,C23709T,T24506G,G24914C,G25135T,A25336C,C26110T,C27972T,G28048T,A28111G,G28280C,A28281T,T28282A,G2881A,G28882A,G28883C,C28977T                                                                                                                                                                |  |                                                                                                                                                                                                                   |  |  |
| hCoV-19/Mexico/SLP-INdRE_FB18344_S3976/2021 | EPI_ISL_2858990 | B.1.1.7 | GRY | 40                                                                                                                                                                                                                                                                                                  | 241T,C913T,C3037T,C3267T,C5388A,C6525T,A10807G,C14408T,C14676T,C15279T,T16176C,C23271A,A23403G,C23709T,C24374T,T24506G,G24914C,A28111G,G28280C,A28281T,T28282A,C203T,C241T,C913T,G1820A,C3037T,C3267T,C5388A,C5986T,T6954C,G9526T,C1117T,A12162G,C14408T,C14676T,C15279T,C15720T,T16176C,A17615G,T19363C,A21137G,A23063T,C23271A,A23403G,C23604A,C23709T,T24506G,G24914C,G25135T,A25336C,G25337C,C27972T,G28048T,A28111G,G28280C,A28281T,T28282A,G2881A,G28882A,G28883C,C28977T |  |                                                                                                                                                                                                                   |  |  |
| hCoV-19/Mexico/SON-H-3296/2021              | EPI_ISL_2894601 | B.1.1.7 | G   | 22                                                                                                                                                                                                                                                                                                  | 23271A,A23403G,C23709T,C24374T,T24506G,G24914C,A28111G,G28280C,A28281T,T28282A,C203T,C241T,C913T,G1820A,C3037T,C3267T,C5388A,C5986T,T6954C,G9526T,C1117T,A12162G,C14408T,C14676T,C15279T,C15720T,T16176C,A17615G,T19363C,A21137G,A23063T,C23271A,A23403G,C23604A,C23709T,T24506G,G24914C,G25135T,A25336C,G25337C,C27972T,G28048T,A28111G,G28280C,A28281T,T28282A,G2881A,G28882A,G28883C,C28977T                                                                                 |  |                                                                                                                                                                                                                   |  |  |
| hCoV-19/Mexico/SON-INdRE_FB13111_S1494/2021 | EPI_ISL_1805472 | B.1.1.7 | GRY | 21                                                                                                                                                                                                                                                                                                  | 2T,G28048T,A28111G,G28280C,A28281T,T28282A,G2881A,G28882A,G28883C,C28977T                                                                                                                                                                                                                                                                                                                                                                                                       |  |                                                                                                                                                                                                                   |  |  |

|                                              |                 |         |     |                                                                                                                                                                                                                                                                                                                                                                                                                                                                                                                                                    |                                                                                                                                                                                                                                                                                                                                                                                                                                                                                         |   |
|----------------------------------------------|-----------------|---------|-----|----------------------------------------------------------------------------------------------------------------------------------------------------------------------------------------------------------------------------------------------------------------------------------------------------------------------------------------------------------------------------------------------------------------------------------------------------------------------------------------------------------------------------------------------------|-----------------------------------------------------------------------------------------------------------------------------------------------------------------------------------------------------------------------------------------------------------------------------------------------------------------------------------------------------------------------------------------------------------------------------------------------------------------------------------------|---|
| hCoV-19/Mexico/SOIN-INDRE_FB14085_S1758/2021 | EPI_ISL_2101897 | B.1.1.7 | GRY | <p>C241T,C913T,C3037T,C3267T,C5388A,C5986T,C6525T,T6954C,C9298T,C14408T,C14676T,C15279T,T16176C,A23063T,C23271A,A23403G,C23604A,C23709T,C24374T,T24506G,G24914C,T26486C,C27972T,G28048T,A28111G,G28280C,A28281T,T28282A,G28881A,G28882A,G28883C,C241T,C913T,C3037T,C3267T,C5388A,C5986T,T6954C,C14408T,C14649T,C14676T,C15279T,T16176C,C16997T,C18348T,A23063T,C23271A,A23403G,C23604A,C23709T,T24506G,G24914C,A25336C,G25337C,G25767T,C27944T,C27972T,G28001T,G28048T,A28111G,G28280C,A28281T,T28282A,G28881A,G28882A,G28883C,C28977T,C29451T</p> | <p>N:D3L:N:R203K,N:G204R,N:S235F,ORF1a:T1001,ORF1a:A1708D,ORF1a:T2087,ORF1a:I2230T,ORF1b:P314L,ORF8:Q27*,ORF8:R52,ORF8:Y73C,S:N501Y,S:A570D,S:D614G,S:P681H,S:T716I,S:L938F,S:S982A,S:D1118H</p>                                                                                                                                                                                                                                                                                        | 6 |
| hCoV-19/Mexico/SOIN-INDRE_FB16350_S3474/2021 | EPI_ISL_2778989 | B.1.1.7 | GRY | <p>C203T,C241T,C913T,G1820A,C3037T,G3251T,C3267T,C5388A,C5986T,T6954C,G9526T,A12162G,C14408T,C14676T,C15279T,C15720T,T16176C,A17615G,T19363C,A21137G,A23063T,C23280T,C23271A,A23403G,C23604A,C23709T,T24506G,G24914C,G25135T,T26861C,C27972T,G28048T,A28111G,G28280C,A28281T,T28282A,G28881A,G28882A,G28883C,C28977T</p>                                                                                                                                                                                                                           | <p>N:D3L:N:R203K,N:G204R,N:S235F,ORF1a:T1001,ORF1a:A1708D,ORF1a:I2230T,ORF1b:P314L,ORF8:Q27*,ORF8:R52,ORF8:Y73C,S:N501Y,S:A570D,S:D614G,S:P681H,S:T716I,S:L938F,S:S982A,S:D1118H,S:E1258D</p>                                                                                                                                                                                                                                                                                           | 6 |
| hCoV-19/Mexico/SOIN-INDRE_FB17150_S136/2021  | EPI_ISL_2663403 | B.1.1.7 | GRY | <p>C203T,C241T,C913T,G1820A,C3037T,G3251T,C3267T,C5388A,C5986T,T6954C,G9526T,A12162G,C14408T,C14676T,C15279T,C15720T,T16176C,A17615G,T19363C,G20635C,A21137G,A23063T,C23248T,C23271A,A23403G,C23604A,C23709T,T24506G,G24914C,G25135T,C27972T,G28048T,A28111G,G28280C,A28281T,T28282A,G28881A,G28882A,G28883C,C28977T</p>                                                                                                                                                                                                                           | <p>N:D3L:N:R203K,N:G204R,N:S235F,ORF1a:T1001,ORF1a:A1708D,ORF1a:I2230T,ORF1b:P314L,ORF8:Q27*,ORF8:R52,ORF8:Y73C,S:N501Y,S:A570D,S:D614G,S:P681H,S:T716I,S:L938F,S:S982A,S:D1118H,S:K1191N</p>                                                                                                                                                                                                                                                                                           | 6 |
| hCoV-19/Mexico/SOIN-INDRE_FB17167_S3092/2021 | EPI_ISL_2663359 | B.1.1.7 | GRY | <p>C241T,C913T,C3037T,C3267T,C5388A,C5986T,T6954C,C7765T,A8848G,C14408T,C14676T,C15279T,T16176C,C16750T,G19816T,G22901A,C23063T,C23271A,A23403G,C23604A,C23709T,T24506G,G24914C,G25217T,G26727T,T2785C,C27972T,G28048T,A28111G,G28280C,A28281T,T28282A,G28881A,G28882A,G28883C,C28977T</p>                                                                                                                                                                                                                                                         | <p>N:D3L:N:R203K,N:G204R,N:S235F,ORF1a:T1001,ORF1a:A1708D,ORF1a:I2230T,ORF1b:P314L,ORF8:Q27*,ORF8:R52,ORF8:Y73C,S:N501Y,S:A570D,S:D614G,S:P681H,S:T716I,S:L938F,S:S982A,S:D1118H,S:G1219C</p>                                                                                                                                                                                                                                                                                           | 6 |
| hCoV-19/Mexico/SOIN-INDRE_FB17171_S3087/2021 | EPI_ISL_2663354 | B.1.1.7 | GRY | <p>C241T,C913T,C3037T,C3267T,A3845G,C5388A,C5986T,C6525T,T6954C,C9298T,C14408T,C14676T,C15279T,T16176C,A23063T,C23271A,A23403G,C23604A,C23709T,C24374T,T24506G,G24914C,T26486C,C27972T,G28048T,A28111G,G28280C,A28281T,T28282A,G28881A,G28882A,G28883C,C28977T</p>                                                                                                                                                                                                                                                                                 | <p>N:D3L:N:R203K,N:G204R,N:S235F,ORF1a:T1001,ORF1a:K1194E,ORF1a:A1708D,ORF1a:I2230T,ORF1b:P314L,ORF8:Q27*,ORF8:R52,ORF8:Y73C,S:N501Y,S:A570D,S:D614G,S:P681H,S:T716I,S:L938F,S:S982A,S:D1118H</p>                                                                                                                                                                                                                                                                                       | 6 |
| hCoV-19/Mexico/SOIN-INDRE_FB17175_S3088/2021 | EPI_ISL_2663355 | B.1.1.7 | GRY | <p>C241T,C913T,C3037T,C3267T,C5388A,C5986T,C6525T,T6954C,C9298T,C14408T,C14676T,C15279T,T16176C,A23063T,C23271A,A23403G,C23604A,C23709T,T24506G,G24914C,G25135T,C27972T,G28048T,A28111G,G28280C,A28281T,T28282A,G28881A,G28882A,G28883C,C28977T</p>                                                                                                                                                                                                                                                                                                | <p>N:D3L:N:R203K,N:G204R,N:S235F,ORF1a:T1001,ORF1a:A1708D,ORF1a:I2230T,ORF1b:P314L,ORF8:Q27*,ORF8:R52,ORF8:Y73C,S:N501Y,S:A570D,S:D614G,S:P681H,S:T716I,S:L938F,S:S982A,S:D1118H,S:J1258D,S:D1258D</p>                                                                                                                                                                                                                                                                                  | 6 |
| hCoV-19/Mexico/SOIN-INDRE_FB18023_S3947/2021 | EPI_ISL_2858961 | B.1.1.7 | GRY | <p>C241T,C913T,C3037T,C3267T,C5388A,C5986T,T6954C,G7042T,G9929A,A10195G,C12741T,C14120T,C14408T,C14676T,C15279T,T16176C,G22104T,A23063T,C23271A,A23403G,C23604A,C23709T,T24506G,G24914C,C27972T,C28000A,G28048T,G28075T,A28095T,A28111G,G28280C,A28281T,T28282A,G28881A,G28882A,G28883C,C28977T</p>                                                                                                                                                                                                                                                | <p>N:D3L:N:R203K,N:G204R,N:S235F,ORF1a:P9711,ORF1a:T1001,ORF1a:I1542J,ORF1a:A1708D,ORF1a:I2230T,ORF1a:M2259I,ORF1a:D3222N,ORF1a:I47519I,ORF1b:P218L,ORF8:Q27*,ORF8:P36F,ORF8:R52,ORF8:C61F,ORF8:K68* ,ORF8:Y73C,S:N501Y,S:A570D,S:D614G,S:P681H,S:T716I,S:S982A,S:D1118H,S:M70L,N:D3L:N:R203K,N:G204R,N:S235F,ORF1a:T1001,ORF1a:M1586I,ORF1a:I1708D,ORF1a:I2230T,ORF1b:P314L,ORF8:Q27*,ORF8:R52,ORF8:Y73C,S:N501Y,S:A570D,S:D614G,S:P681H,S:T716I,S:L938F,S:S982A,S:D1118H,S:E1258D</p> | 6 |
| hCoV-19/Mexico/SOIN-INDRE_FB18291_S3967/2021 | EPI_ISL_2858981 | Q.3     | GRY | <p>C241T,C913T,C3037T,C3267T,A3492G,C5388A,C5986T,T6954C,C14408T,C14676T,C15279T,T16176C,C18804T,C21639A,A23063T,C23271A,A23403G,C23604A,C23709T,C24374T,T24506G,G24914C,A25164T,C27972T,G28048T,A28111G,G28280C,A28281T,T28282A,G28881A,G28882A,G28883C,C28977T</p>                                                                                                                                                                                                                                                                               | <p>N:D3L:N:R203K,N:G204R,N:S235F,ORF1a:T1001,ORF1a:N1076S,ORF1a:A1708D,ORF1a:I2230T,ORF1b:P314L,ORF8:Q27*,ORF8:R52,ORF8:Y73C,S:P28H,S:Q120I,S:Q120I,S:A570D,S:D614G,S:P681H,S:T716I,S:L938F,S:S982A,S:D1118H,S:Q120I</p>                                                                                                                                                                                                                                                                | 6 |
| hCoV-19/Mexico/SOIN-INDRE_FB18293_S3968/2021 | EPI_ISL_2858982 | B.1.1.7 | GRY | <p>C241T,C913T,C3037T,C3267T,C5388A,C5986T,T6954C,G7042T,A10195G,C10279T,C14120T,C14408T,C14676T,C15279T,T16176C,C16887T,G17427T,A23063T,C23271A,A23403G,C23604A,C23709T,T24506G,G24914C,G25052T,C27972T,G28048T,G28075T,A28111G,G28280C,A28281T,T28282A,G28881A,G28882A,G28883C,C28977T</p>                                                                                                                                                                                                                                                       | <p>N:D3L:N:R203K,N:G204R,N:S235F,ORF1a:T1001,ORF1a:A1708D,ORF1a:I2230T,ORF1a:M2259I,ORF1b:P218L,ORF1b:P314L,ORF8:Q27*,ORF8:R52,ORF8:C61F,ORF8:K68* ,ORF8:Y73C,S:N501Y,S:A570D,S:D614G,S:P681H,S:T716I,S:L938F,S:S982A,S:D1118H,S:V1164F</p>                                                                                                                                                                                                                                             | 6 |
| hCoV-19/Mexico/TAB-INDRE_FB16513_S2742/2021  | EPI_ISL_2533768 | B.1.1.7 | GRY | <p>C241T,C913T,C3037T,C3267T,C5388A,C5986T,T6954C,G7042T,A10195G,C10279T,C14120T,C14408T,C14676T,C15279T,T16176C,C16887T,G17427T,A23063T,C23271A,A23403G,C23604A,C23709T,T24506G,G24914C,C27972T,G28048T,G28075T,A28111G,G28280C,A28281T,T28282A,G28881A,G28882A,G28883C,C28977T</p>                                                                                                                                                                                                                                                               | <p>N:D3L:N:R203K,N:G204R,N:S235F,ORF1a:T1001,ORF1a:A1708D,ORF1a:I2230T,ORF1a:M2259I,ORF1b:P218L,ORF1b:P314L,ORF8:Q27*,ORF8:R52,ORF8:C61F,ORF8:Y73C,S:N501Y,S:A570D,S:D614G,S:P681H,S:T716I,S:L938F,S:S982A,S:D1118H</p>                                                                                                                                                                                                                                                                 | 6 |
| hCoV-19/Mexico/TAB-INDRE_FB16514_S2743/2021  | EPI_ISL_2533769 | B.1.1.7 | GRY | <p>C241T,C913T,C3037T,C3267T,C5388A,C5986T,T6954C,G7042T,G8174A,A10195G,C10279T,C14120T,C14408T,C14676T,C15279T,T16176C,C16887T,G17427T,A23063T,C23271A,A23403G,C23604A,C23709T,T24506G,G24914C,A25097G,A25336C,G25337C,C27972T,G28048T,G28075T,A28111G,G28280C,A28281T,T28282A,G28881A,G28882A,G28883C,C28977T,A29700G</p>                                                                                                                                                                                                                        | <p>N:D3L:N:R203K,N:G204R,N:S235F,ORF1a:T1001,ORF1a:A1708D,ORF1a:I2230T,ORF1a:M2259I,ORF1a:A2637T,ORF1b:P218L,ORF1b:P314L,ORF8:Q27*,ORF8:R52,ORF8:C61F,ORF8:Y73C,S:N501Y,S:A570D,S:D614G,S:P681H,S:T716I,S:S982A,S:D1118H,S:E1258D</p>                                                                                                                                                                                                                                                   | 6 |
| hCoV-19/Mexico/TAB-INDRE_FB16926_S3069/2021  | EPI_ISL_2663336 | B.1.1.7 | GRY | <p>C241T,C913T,C3037T,C3267T,C5388A,C5986T,T6954C,G7042T,A8031G,A10195G,C10279T,C14120T,C14408T,C14676T,C15279T,T16176C,C16887T,G17427T,A23063T,C23271A,A23403G,C23604A,C23709T,T24506G,G24914C,G25052T,A25336C,C27972T,G28048T,G28075T,A28111G,G28280C,A28281T,T28282A,G28881A,G28882A,G28883C,C28977T,C29085T</p>                                                                                                                                                                                                                                | <p>N:D3L:N:R203K,N:G204R,N:S235F,ORF1a:T1001,ORF1a:A1708D,ORF1a:I2230T,ORF1a:M2259I,ORF1a:A2637T,ORF1b:P218L,ORF1b:P314L,ORF8:Q27*,ORF8:R52,ORF8:C61F,ORF8:Y73C,S:N501Y,S:A570D,S:D614G,S:P681H,S:T716I,S:L938F,S:S982A,S:D1118H,S:V1164F</p>                                                                                                                                                                                                                                           | 6 |
| hCoV-19/Mexico/TAB-INDRE_FB16929_S3070/2021  | EPI_ISL_2663337 | B.1.1.7 | GRY | <p>C241T,C913T,C3037T,C3267T,C5388A,C5986T,T6954C,G7042T,A10195G,C10279T,C14120T,C14408T,C14676T,C15279T,T16176C,T17007C,A17615G,A23063T,A23118G,C23271A,A23403G,C23604A,C23709T,C24378T,T24506G,G24914C,A25336C,G25494T,C25587T,C25624T,G26167T,G26849T,C27972T,G28048T,A28111G,G28280C,A28281T,T28282A,G28881A,G28882A,G28883C,C28977T</p>                                                                                                                                                                                                       | <p>N:D3L:N:R203K,N:G204R,N:S235F,ORF1a:T1001,ORF1a:A1708D,ORF1a:I2230T,ORF1a:M2259I,ORF1b:P218L,ORF1b:P314L,ORF8:Q27*,ORF8:R52,ORF8:C61F,ORF8:Y73C,S:N501Y,S:A570D,S:D614G,S:P681H,S:T716I,S:L938F,S:S982A,S:D1118H</p>                                                                                                                                                                                                                                                                 | 6 |
| hCoV-19/Mexico/TAB-INDRE_FB16931_S3071/2021  | EPI_ISL_2663338 | B.1.1.7 | GRY | <p>T78G,C241T,C913T,C2110T,C3037T,C3267T,C5388A,C5986T,T6954C,G7042T,A10195G,C10279T,C14120T,C14408T,C14676T,C15279T,T16176C,C16887T,G17427T,A23063T,C23271A,A23403G,C23604A,C23709T,T24506G,G24914C,C27972T,G28048T,G28075T,A28111G,G28280C,A28281T,T28282A,G28881A,G28882A,G28883C,C28977T</p>                                                                                                                                                                                                                                                   | <p>N:D3L:N:R203K,N:G204R,N:S235F,ORF1a:T1001,ORF1a:A1708D,ORF1a:I2230T,ORF1a:M2259I,ORF1b:P218L,ORF1b:P314L,ORF8:Q27*,ORF8:R52,ORF8:C61F,ORF8:Y73C,S:N501Y,S:A570D,S:D614G,S:P681H,S:T716I,S:L938F,S:S982A,S:D1118H</p>                                                                                                                                                                                                                                                                 | 6 |
| hCoV-19/Mexico/TAB-INDRE_FB16944_S3072/2021  | EPI_ISL_2663339 | B.1.1.7 | GRY | <p>C241T,C913T,C3037T,C3267T,C5388A,C5986T,T6954C,C7564T,C9967T,C11195T,C14408T,C14676T,T15096C,C15279T,T16176C,G21901A,C22987T,A23063T,C23271A,A23403G,C23604A,C23709T,T24506G,G24914C,C27972T,G28048T,A28111G,G28280C,A28281T,T28282A,G28881A,G28882A,G28883C,C28977T</p>                                                                                                                                                                                                                                                                        | <p>N:D3L:N:R203K,N:G204P,N:S235F,ORF1a:T1001,ORF1a:A1708D,ORF1a:I2230T,ORF1a:L3644F,ORF1b:P314L,ORF8:Q27*,ORF8:R52,ORF8:Y73C,S:N501Y,S:A570D,S:D614G,S:P681H,S:T716I,S:L938F,S:S982A,S:D1118H,S:E1258D</p>                                                                                                                                                                                                                                                                              | 6 |
| hCoV-19/Mexico/TAB-INDRE_FB16947_S3073/2021  | EPI_ISL_2663340 | B.1.1.7 | GRY | <p>C241T,C913T,C3037T,C3267T,C5388A,C5986T,T6954C,C8848G,C14408T,C14676T,C15279T,T16176C,A23063T,C23271A,A23403G,C23604A,C23709T,T24506G,G24914C,G25336C,G25337C,C27972T,G28048T,G28075T,A28111G,G28280C,A28281T,T28282A,G28881A,G28882A,G28883C,C28977T</p>                                                                                                                                                                                                                                                                                       | <p>N:D3L:N:R203K,N:G204R,N:S235F,ORF1a:T1001,ORF1a:A1708D,ORF1a:I2230T,ORF1b:P314L,ORF8:Q27*,ORF8:R52,ORF8:Y73C,S:N501Y,S:A570D,S:D614G,S:P681H,S:T716I,S:L938F,S:S982A,S:D1118H</p>                                                                                                                                                                                                                                                                                                    | 6 |
| hCoV-19/Mexico/TAB-INDRE_FB16948_S3074/2021  | EPI_ISL_2663341 | B.1.1.7 | GRY | <p>C241T,C913T,C3037T,C3267T,C5388A,C5986T,T6954C,G7042T,A10195G,C10279T,C14120T,C14408T,C14676T,C15180T,C15279T,T16176C,C16887T,G17427T,A23063T,C23271A,A23403G,C23604A,C23709T,T24506G,G24914C,G25395T,A27943G,C27972T,G28048T,G28075T,A28075T,A28111G,G28280C,A28281T,T28282A,G28881A,G28882A,G28883C,C28977T</p>                                                                                                                                                                                                                               | <p>N:D3L:N:R203K,N:G204R,N:S235F,ORF1a:T554J,ORF1a:T1001,ORF1a:A1708D,ORF1a:I2230T,ORF1a:M2259I,ORF1b:P218L,ORF1b:P314L,ORF8:Q27*,ORF8:R52,ORF8:C61F,ORF8:K68* ,ORF8:Y73C,S:N501Y,S:A570D,S:D614G,S:P681H,S:T716I,S:L938F,S:S982A,S:D1118H</p>                                                                                                                                                                                                                                          | 6 |
| hCoV-19/Mexico/TAB-INDRE_FB17013_S3079/2021  | EPI_ISL_2663346 | B.1.1.7 | GRY | <p>C241T,C913T,C3037T,C3267T,C5388A,C5986T,T6954C,G7042T,A10195G,C10279T,C14120T,C14408T,C14676T,C15279T,T16176C,C16887T,G17427T,A23063T,C23271A,A23403G,C23604A,C23709T,T24506G,G24914C,G25395T,A27943G,C27972T,G28048T,G28075T,A28075T,A28111G,G28280C,A28281T,T28282A,G28881A,G28882A,G28883C,C28977T</p>                                                                                                                                                                                                                                       | <p>N:D3L:N:R203K,N:G204R,N:S235F,ORF1a:T1001,ORF1a:A1708D,ORF1a:I2230T,ORF1a:M2259I,ORF1b:P218L,ORF1b:P314L,ORF8:Q27*,ORF8:R52,ORF8:C61F,ORF8:K68* ,ORF8:Y73C,S:N501Y,S:A570D,S:D614G,S:P681H,S:T716I,S:L938F,S:S982A,S:D1118H</p>                                                                                                                                                                                                                                                      | 6 |
| hCoV-19/Mexico/TAB-INDRE_FB17014_S3080/2021  | EPI_ISL_2663347 | B.1.1.7 | GRY | <p>95T,A28111G,G28280C,A28281T,T28282A,G28881A,G28882A,G28883C,C28977T</p>                                                                                                                                                                                                                                                                                                                                                                                                                                                                         | <p>N:D3L:N:R203K,N:G204R,N:S235F,ORF1a:T1001,ORF1a:A1708D,ORF1a:I2230T,ORF1a:M2259I,ORF1b:P218L,ORF1b:P314L,ORF8:Q27*,ORF8:R52,ORF8:C61F,ORF8:K68* ,ORF8:Y73C,S:N501Y,S:A570D,S:D614G,S:P681H,S:T716I,S:L938F,S:S982A,S:D1118H</p>                                                                                                                                                                                                                                                      | 6 |













|                                             |                 |         |     |    |                                                                                                                                                                                                                                                                                                                                                                                                                                                                                                                                                                                                                                                     |                                                                                                                                                                                                                                                                       |     |
|---------------------------------------------|-----------------|---------|-----|----|-----------------------------------------------------------------------------------------------------------------------------------------------------------------------------------------------------------------------------------------------------------------------------------------------------------------------------------------------------------------------------------------------------------------------------------------------------------------------------------------------------------------------------------------------------------------------------------------------------------------------------------------------------|-----------------------------------------------------------------------------------------------------------------------------------------------------------------------------------------------------------------------------------------------------------------------|-----|
| hCoV-19/Mexico/TAM-InDRE_FB15942_S2406/2021 | EPI_ISL_2455930 | B.1.1.7 | GRY | 41 | C241T,C913T,C2110T,C3037T,C3267T,C5388A,C5986T,C6651T,T6954C,G7042T,A10195G,C12855T,C14120T,C14408T,C14676T,C15279T,C15933T,T16176C,G19872T,A23063T,C23271A,A23403G,C23604A,C23709T,T24506G,G24914C,A25336C,T25171G,C26936T,A27745G,C27972T,G28075T,G28075T,A28111G,G28280C,A28281T,T28282A,G28881A,G28882A,G28883C,C28977T                                                                                                                                                                                                                                                                                                                         | N:D3L:N:R203K,N:G204R,N:S235F,ORF1a:T1001,ORF1a:A1708D,ORF1a:A2129V,ORF1a:I2230T,ORF1a:M2259I,ORF1a:P4817R,ORF1a:P218L,ORF1a:P314L,ORF3a:Y109D,ORF7a:R118G,ORF8:Q27*,ORF8:R52I,ORF8:G61F,ORF8:Y73C,S:N501Y,S:A570D,S:D614G,S:P681H,S:T716I,S:S982A,S:D1118H,S:E1258D  | 29  |
| hCoV-19/Mexico/TAM-InDRE_FB15943_S2407/2021 | EPI_ISL_2455931 | B.1.1.7 | GRY | 42 | C110T,C241T,C913T,C2110T,C3037T,C3267T,C3543T,C5388A,C5986T,C6762T,T6954C,G7042T,A10195G,C10341T,C14120T,C14408T,C14676T,C15279T,T16176C,A23063T,C23271A,A23403G,C23604A,C23709T,T24506G,G24914C,A25336C,C26645T,C27804T,C27972T,G28048T,G28075T,A28111G,G28280C,A28281T,T28282A,G28881A,G28882A,G28883C,C28977T,G29751T,C241T,C292T,C913T,G1820A,C3037T,C3267T,A3963G,C5388A,C5986T,T6954C,C14408T,C14676T,C15279T,T16176C,T16563A,G22249A,A23063T,C23170T,C23271A,A23403G,C23604A,C23709T,T24506G,G24914C,A25336C,C25626T,G26506T,A26612G,C27972T,G28048T,A28111G,G28111T,G28280C,A28281T,T28282A,A28295C,C28657T,G28881A,G28882A,G28883C,C28977T | N:D3L:N:R203K,N:G204R,N:S235F,ORF1a:T1001,ORF1a:A1708D,ORF1a:I2230T,ORF1a:M2259I,ORF1a:P3359L,ORF1b:P218L,ORF1b:P314L,ORF8:Q27*,ORF8:R52I,ORF8:G61F,ORF8:Y73C,S:N501Y,S:A570D,S:D614G,S:P681H,S:T716I,S:S982A,S:D1118H,S:E1258D                                       | 29  |
| hCoV-19/Mexico/TAM-InDRE_FB15944_S2408/2021 | EPI_ISL_2455932 | B.1.1.7 | GRY | 41 | C241T,C913T,C2110T,C3037T,C3267T,C5388A,C5986T,T6954C,G7042T,A10195G,C10279T,C14120T,C14408T,C14676T,C15279T,T16176C,C16887T,G17427T,G21624T,A23063T,C23271A,A23403G,C23604A,C23709T,T24506G,G24914C,A25336C,C27972T,G28048T,G28075T,A28111G,G28280C,A28281T,T28282A,G28881A,G28882A,G28883C,C28977T                                                                                                                                                                                                                                                                                                                                                | N:D3L:N:R203K,N:G204R,N:S235F,ORF1a:T1001,ORF1a:A1708D,ORF1a:I2230T,ORF1a:M2259I,ORF1b:P218L,ORF1b:P314L,ORF8:Q27*,ORF8:R52I,ORF8:G61F,ORF8:Y73C,S:N501Y,S:A570D,S:D614G,S:P681H,S:T716I,S:S982A,S:D1118H,S:E1258D                                                    | 14  |
| hCoV-19/Mexico/TAM-InDRE_FB15955_S2409/2021 | EPI_ISL_2455933 | B.1.1.7 | GRY | 38 | 8280C,A28281T,T28282A,G28881A,G28882A,G28883C,C28977T                                                                                                                                                                                                                                                                                                                                                                                                                                                                                                                                                                                               | N:D3L:N:R203K,N:G204R,N:S235F,ORF1a:T1001,ORF1a:A1708D,ORF1a:I2230T,ORF1a:M2259I,ORF1b:P218L,ORF1b:P314L,ORF8:Q27*,ORF8:R52I,ORF8:G61F,ORF8:Y73C,S:N501Y,S:A570D,S:D614G,S:P681H,S:T716I,S:S982A,S:D1118H,S:E1258D                                                    | 0   |
| hCoV-19/Mexico/TAM-InDRE_FB16011_S2411/2021 | EPI_ISL_2455935 | B.1.1.7 | GRY | 40 | C241T,C913T,C2110T,C143T,C3037T,C3267T,C5388A,C5986T,T6954C,G7042T,C7945T,A10195G,C10834T,C14120T,C14408T,A14613G,C14676T,C15279T,T16176C,A23063T,C23271A,A23403G,C23604A,C23709T,T24506G,G24914C,A25336C,C27972T,G28048T,G28075T,A28111G,C2823G,G28280C,A28281T,T28282A,G28881A,G28882A,G28883C,C28977T,C29642T                                                                                                                                                                                                                                                                                                                                    | N:D3L:N:R203K,N:G204R,N:S235F,ORF1a:T1001,ORF1a:A1708D,ORF1a:I2230T,ORF1a:M2259I,ORF1b:P218L,ORF1b:P314L,ORF8:Q27*,ORF8:R52I,ORF8:G61F,ORF8:Y73C,S:N501Y,S:A570D,S:D614G,S:P681H,S:T716I,S:S982A,S:D1118H,S:E1258D                                                    | 0   |
| hCoV-19/Mexico/TAM-InDRE_FB16013_S2412/2021 | EPI_ISL_2455936 | B.1.1.7 | GRY | 38 | C241T,C913T,C2110T,C3037T,C3267T,C5388A,C5986T,T6954C,G7042T,A10195G,C14120T,C14408T,C14676T,C15279T,C15933T,T16176C,A23063T,C23170T,C23271A,A23403G,C23604A,C23709T,T24506G,G24914C,A25336C,C25626T,C27972T,G28048T,A28111G,G28280C,A28281T,T28282A,A28295C,G28881A,G28882A,G28883C,C28977T                                                                                                                                                                                                                                                                                                                                                        | N:D3L:N:R203K,N:G204R,N:S235F,ORF1a:T1001,ORF1a:A1708D,ORF1a:I2230T,ORF1a:M2259I,ORF1b:P218L,ORF1b:P314L,ORF8:Q27*,ORF8:R52I,ORF8:G61F,ORF8:Y73C,S:N501Y,S:A570D,S:D614G,S:P681H,S:T716I,S:S982A,S:D1118H,S:E1258D                                                    | 4   |
| hCoV-19/Mexico/TAM-InDRE_FB16014_S2413/2021 | EPI_ISL_2455937 | B.1.1.7 | GRY | 36 | C241T,C913T,C2110T,C3037T,C3267T,C5388A,C5986T,T6954C,C12115T,C14408T,C14676T,C15279T,T16176C,T16563A,T17343C,T17835C,C19269T,A23063T,C23170T,C23271A,G23401T,A23403G,C23604A,C23709T,T24506G,G24914C,A25336C,C25626T,C26885T,G28280C,A28281T,T28282A,A28295C,G28881A,G28882A,G28883C,C28977T,C29200T                                                                                                                                                                                                                                                                                                                                               | N:D3L:N:R203K,N:G204R,N:S235F,ORF1a:T1001,ORF1a:A1708D,ORF1a:I2230T,ORF1b:P314L,ORF9b:K4N,S:N501Y,S:A570D,S:Q613H,S:D614G,S:P681H,S:T716I,S:S982A,S:D1118H,S:E1258D                                                                                                   | 11  |
| hCoV-19/Mexico/TAM-InDRE_FB16015_S2414/2021 | EPI_ISL_2455938 | B.1.1.7 | GRY | 40 | C241T,C913T,C2110T,C3037T,C3267T,C5388A,C5986T,T6954C,G7042T,A10195G,C14120T,C14408T,C14676T,C15279T,C15933T,T16176C,G28280C,A28281T,T28282A,G28881A,G28882A,G28883C,C28977T,C29200T                                                                                                                                                                                                                                                                                                                                                                                                                                                                | M:M84I,N:D3L:N:R203K,N:G204R,N:S235F,ORF1a:T403I,ORF1a:T1001,ORF1a:A1708D,ORF1a:I2230T,ORF1a:M2259I,ORF1b:P218L,ORF1b:P314L,ORF8:Q27*,ORF8:R52I,ORF8:G61F,ORF8:Y73C,S:N512F,S:N501Y,S:A570D,S:D614G,S:P681H,S:T716I,S:S982A,S:D1118H,S:E1258D                         | 309 |
| hCoV-19/Mexico/TAM-InDRE_FB16016_S2415/2021 | EPI_ISL_2455939 | B.1.1.7 | GRY | 42 | T,G28048T,G28075T,A28111G,G28280C,A28281T,T28282A,G28881A,G28882A,G28883C,C28977T,G29751T,C241T,C913T,C1076T,C2110T,C3037T,C3267T,A5116G,C5388A,C5986T,C6388T,T6954C,G7042T,A10195G,C11224T,G11335A,C14120T,C14408T,C14676T,A14856G,C15279T,T16176C,A23063T,C23271A,A23403G,C23604A,C23709T,T24506G,G24914C,A25336C,C27972T,G28048T,G28075T,A28111G,G28280C,A28281T,T28282A,G28881A,G28882A,G28883C,C28977T                                                                                                                                                                                                                                         | N:D3L:N:R203K,N:G204R,N:S235F,ORF1a:T1001,ORF1a:A1708D,ORF1a:I2230T,ORF1a:M2259I,ORF1b:P218L,ORF1b:P314L,ORF8:Q27*,ORF8:R52I,ORF8:G61F,ORF8:Y73C,S:N501Y,S:A570D,S:D614G,S:P681H,S:T716I,S:S982A,S:D1118H,S:E1258D                                                    | 60  |
| hCoV-19/Mexico/TAM-InDRE_FB16017_S2416/2021 | EPI_ISL_2455940 | B.1.1.7 | GRY | 41 | C241T,C913T,C2110T,C3037T,C3267T,C5388A,C5986T,T6954C,C14408T,C14676T,C15279T,T16176C,T16563A,T12136A,C21597T,T22861C,A23063T,C23170T,C23271A,A23403G,C23604A,C23709T,T24506G,G24914C,C25626T,T25868A,C27972T,G28048T,A28111G,G28280C,A28281T,T28282A,A28295C,G28881A,G28882A,G28883C,C28977T                                                                                                                                                                                                                                                                                                                                                       | N:D3L:N:R203K,N:G204R,N:S235F,ORF1a:T1001,ORF1a:A1708D,ORF1a:I2230T,ORF1a:M2259I,ORF1b:P218L,ORF1b:P314L,ORF8:Q27*,ORF8:R52I,ORF8:G61F,ORF8:Y73C,S:N501Y,S:A570D,S:D614G,S:P681H,S:T716I,S:S982A,S:D1118H,S:E1258D                                                    | 133 |
| hCoV-19/Mexico/TAM-InDRE_FB16018_S2417/2021 | EPI_ISL_2455941 | B.1.1.7 | GRY | 39 | C241T,C913T,C2110T,C3037T,C3267T,C5388A,C5986T,T6954C,G7042T,A10195G,C14120T,C14408T,C14676T,C15279T,T16176C,T16563A,C16580T,A23063T,C23170T,C23271A,A23403G,C23604A,C23709T,T24506G,G24914C,A25336C,C25626T,C27972T,G28048T,A28111G,G28280C,A28281T,T28282A,A28295C,G28881A,G28882A,G28883C,C28977T                                                                                                                                                                                                                                                                                                                                                | N:D3L:N:R203K,N:G204R,N:S235F,ORF1a:T1001,ORF1a:A1708D,ORF1a:I2230T,ORF1b:P314L,ORF9b:K4N,S:N501Y,S:A570D,S:Q613H,S:D614G,S:P681H,S:T716I,S:S982A,S:D1118H                                                                                                            | 125 |
| hCoV-19/Mexico/TAM-InDRE_FB16019_S2418/2021 | EPI_ISL_2455942 | B.1.1.7 | GRY | 42 | C241T,C913T,C2110T,C3037T,C3267T,T3508G,C5388A,C5986T,T6954C,G7042T,A10195G,C14120T,C14408T,C14676T,C15279T,C15933T,T16176C,G22113T,C22450T,A23063T,C23271A,A23403G,C23604A,C23625T,C23709T,T24506G,G24914C,A25336C,A27745G,T27939C,C27972T,G28075T,G28075T,A28111G,G28280C,A28281T,T28282A,G28881A,G28882A,G28883C,C28977T                                                                                                                                                                                                                                                                                                                         | N:D3L:N:R203K,N:G204R,N:S235F,ORF1a:T1001,ORF1a:N1081K,ORF1a:A1708D,ORF1a:I2230T,ORF1a:M2259I,ORF1b:P218L,ORF1b:P314L,ORF7a:R118G,ORF8:F16L,ORF8:Q27*,ORF8:R52I,ORF8:G61F,ORF8:Y73C,S:G184V,S:N501Y,S:A570D,S:D614G,S:P681H,S:A688H,S:T716I,S:S982A,S:D1118H,S:E1258D | 0   |
| hCoV-19/Mexico/TAM-InDRE_FB16020_S2419/2021 | EPI_ISL_2455943 | B.1.1.7 | GRY | 41 | C241T,C913T,C3037T,C3267T,T6954C,C14408T,C14676T,T15096C,C15279T,T16176C,C18681T,T21236A,C19101A,C22987T,C22993T,A23063T,C23271A,A23403G,C23604A,C23709T,T24506G,G24914C,A25336C,C27972T,G28048T,A28111G,G28280C,A28281T,T28282A,A28295C,G28881A,G28882A,G28883C,C28977T                                                                                                                                                                                                                                                                                                                                                                            | N:D3L:N:R203K,N:G204R,N:S235F,ORF1a:T1001,ORF1a:A1708D,ORF1a:I2230T,ORF1b:P314L,ORF1b:F2590Y,ORF8:Q27*,ORF8:R52I,ORF8:Y73C,ORF9b:R32L,S:N501Y,S:A570D,S:D614G,S:P681H,S:T716I,S:S982A,S:D1118H,S:E1258D                                                               | 39  |
| hCoV-19/Mexico/TAM-InDRE_FB16022_S2421/2021 | EPI_ISL_2455945 | B.1.1.7 | GRY | 37 | 8282A,G28378T,G28881A,G28882A,G28883C,G28884C,C28977T                                                                                                                                                                                                                                                                                                                                                                                                                                                                                                                                                                                               | N:D3L:N:R203K,N:G204R,N:S235F,ORF1a:T1001,ORF1a:A1708D,ORF1a:I2230T,ORF1a:M2259I,ORF1b:P218L,ORF1b:P314L,ORF8:Q27*,ORF8:R52I,ORF8:G61F,ORF8:Y73C,ORF9b:K4N,S:F135L,S:N501Y,S:A570D,S:D614G,S:P681H,S:T716I,S:S982A,S:D1118H,S:E1258D                                  | 0   |
| hCoV-19/Mexico/TAM-InDRE_FB16023_S2422/2021 | EPI_ISL_2455946 | B.1.1.7 | GRY | 34 | C241T,C913T,C3037T,C3267T,C5388A,C5986T,T6954C,C14408T,C14676T,C15279T,T16176C,C18348T,A23063T,C23271A,A23403G,C23604A,C23709T,G23811A,T24506G,G24914C,G24914A,C25336C,C27972T,G28048T,A28111G,G28209T,G28280C,A28281T,T28282A,G28881A,G28882A,G28883C,C28977T,C29632T                                                                                                                                                                                                                                                                                                                                                                              | N:D3L:N:R203K,N:G204R,N:S235F,ORF1a:T1001,ORF1a:A1708D,ORF1a:I2230T,ORF1a:M2259I,ORF1b:P218L,ORF1b:P314L,ORF7a:R118G,ORF8:Q27*,ORF8:R52I,ORF8:G61F,ORF8:Y73C,S:N501Y,S:A570D,S:D614G,S:P681H,S:T716I,S:S982A,S:D1118H,S:E1258D                                        | 0   |
| hCoV-19/Mexico/TAM-InDRE_FB16024_S2423/2021 | EPI_ISL_2455947 | B.1.1.7 | GRY | 41 | 75T,A28111G,G28280C,A28281T,T28282A,G28881A,G28882A,G28883C,C28977T,G29688T                                                                                                                                                                                                                                                                                                                                                                                                                                                                                                                                                                         | N:D3L:N:R203K,N:G204R,N:S235F,ORF1a:T1001,ORF1a:A1708D,ORF1a:I2230T,ORF1a:M2259I,ORF1b:P218L,ORF1b:P314L,ORF8:Q27*,ORF8:R52I,ORF8:G61F,ORF8:Y73C,S:N501Y,S:A570D,S:D614G,S:P681H,S:T716I,S:S982A,S:D1118H,S:E1258D                                                    | 0   |
| hCoV-19/Mexico/TAM-InDRE_FB16025_S2424/2021 | EPI_ISL_2455948 | B.1.1.7 | GRY | 37 | 295C,G28881A,G28882A,G28883C,C28957T,C28977T                                                                                                                                                                                                                                                                                                                                                                                                                                                                                                                                                                                                        | N:D3L:N:R203K,N:G204R,N:S235F,ORF1a:T1001,ORF1a:A1708D,ORF1a:I2230T,ORF1a:M2259I,ORF1b:P218L,ORF1b:P314L,ORF8:Q27*,ORF8:R52I,ORF8:G61F,ORF8:Y73C,ORF9b:K4N,S:N501Y,S:A570D,S:D614G,S:P681H,S:T716I,S:S982A,S:D1118H,S:E1258D                                          | 0   |
| hCoV-19/Mexico/TAM-InDRE_FB16026_S2425/2021 | EPI_ISL_2455949 | B.1.1.7 | GRY | 37 | A,A28295C,G28881A,G28882A,G28883C,C28977T                                                                                                                                                                                                                                                                                                                                                                                                                                                                                                                                                                                                           | N:D3L:N:R203K,N:G204R,N:S235F,ORF1a:T1001,ORF1a:A1708D,ORF1a:I2230T,ORF1b:P314L,ORF1b:P314L,ORF8:Q27*,ORF8:R52I,ORF8:G61F,ORF8:Y73C,ORF9b:K4N,S:N501Y,S:A570D,S:D614G,S:P681H,S:T716I,S:S982A,S:D1118H,S:E1258D                                                       | 0   |

|                                             |                 |         |     |    |                                                                                                                                                                                                                                                                                                                       |                                                                                                                                                                                                                                                                                |     |
|---------------------------------------------|-----------------|---------|-----|----|-----------------------------------------------------------------------------------------------------------------------------------------------------------------------------------------------------------------------------------------------------------------------------------------------------------------------|--------------------------------------------------------------------------------------------------------------------------------------------------------------------------------------------------------------------------------------------------------------------------------|-----|
| hCoV-19/Mexico/TAM-InDRE_FB16027_S2426/2021 | EPI_ISL_2455950 | B.1.1.7 | GRY | 38 | C241T,C292T,C913T,C3037T,C3267T,C5388A,C5986T,76954C,C14408T,C14676T,C15279T,T16176C,T16563A,T21763C,T22861C,A23063T,C23170T,C23271A,A23403G,C23604A,C23709T,T24506G,G24914C,A25336C,G25626T,C26885T,C27972T,G28048T,A28111G,G28280C,A28281T,T28282A,A28295C,G28881A,G28882A,G28883C,C28977T,T29107C                  | N:D3L:N:N8H,N:R203K,N:G204R,N:S235F,ORF1a:T1001,ORF1a:A1708D,ORF1a:I2230T,ORF1b:P314L,ORF8:Q27*,ORF8:R52I,ORF8:Y73C,ORF9b:K4N,S:N501Y,S:A570D,S:D614G,S:P681H,S:T716I,S:S982A,S:D1118H,S:E1258D                                                                                | 0   |
| hCoV-19/Mexico/TAM-InDRE_FB16028_S2427/2021 | EPI_ISL_2455951 | B.1.1.7 | GRY | 36 | C241T,C913T,C3037T,C3267T,C5388A,C5986T,76954C,C14408T,C14676T,C15279T,T16176C,C18348T,T19301C,A23063T,C23271A,A23403G,C23604A,C23709T,G23811A,T24506G,G24914C,G24971A,A25336C,C27972T,G28048T,A28111G,G28280C,A28281T,T28282A,G28881A,G28882A,G28883C,C28977T,C29632T                                                | N:D3L:N:R203K,N:G204R,N:S235F,ORF1a:T1001,ORF1a:A1708D,ORF1a:I2230T,ORF1b:P314L,ORF1b:K798I,ORF1b:V1945A,ORF8:Q27*,ORF8:R52I,ORF8:Y73C,ORF8:E106*,S:N501Y,S:A570D,S:D614G,S:P681H,S:T716I,S:S750N,S:S982A,S:D1118H,S:V1137I,S:E1258D                                           | 0   |
| hCoV-19/Mexico/TAM-InDRE_FB16029_S2428/2021 | EPI_ISL_2455952 | B.1.1.7 | GRY | 38 | C241T,C913T,C3037T,C3267T,C5388A,C5986T,76954C,C14408T,C14676T,C15279T,T16176C,C18348T,A23063T,C23271A,A23403G,C23604A,C23709T,G23811A,T24506G,G24914C,A25336C,G24914C,A25336C,C27643T,C27972T,G28048T,A28111G,G28280C,A28281T,T28282A,A28295C,G28881A,G28882A,G28883C,C28977T                                        | N:D3L:N:N8D,N:R203K,N:G204R,N:S235F,ORF1a:S391F,ORF1a:I730F,ORF1a:T1001,ORF1a:A1708D,ORF1a:I2230T,ORF1a:I3116F,ORF1b:P314L,ORF1b:V1945A,ORF1b:T2514I,ORF7a:P84S,ORF8:Q27*,ORF8:R52I,ORF8:Y73C,S:S98F,S:D128H,S:N501Y,S:A570D,S:D614G,S:P681H,S:T716I,S:S982A,S:D1118H,S:E1258D | 134 |
| hCoV-19/Mexico/TAM-InDRE_FB16031_S2430/2021 | EPI_ISL_2455954 | B.1.1.7 | GRY | 34 | C241T,C913T,C3037T,C3267T,C5388A,C5986T,76954C,C14408T,C14676T,C15279T,T16176C,C18348T,A23063T,C23271A,A23403G,C23604A,C23709T,G23811A,T24506G,G24914C,A25336C,C27972T,G28048T,A28111G,G28280C,A28281T,T28282A,G28881A,G28882A,G28883C,C28977T,C29632T                                                                | N:D3L:N:R203K,N:G204R,N:S235F,ORF1a:T1001,ORF1a:A1708D,ORF1a:I2230T,ORF1b:P314L,ORF8:Q27*,ORF8:R52I,ORF8:Y73C,ORF8:E106*,S:N501Y,S:A570D,S:D614G,S:P681H,S:T716I,S:S750N,S:S982A,S:D1118H,S:V1137I,S:E1258D                                                                    | 23  |
| hCoV-19/Mexico/TAM-InDRE_FB16032_S2431/2021 | EPI_ISL_2455955 | B.1.1.7 | GRY | 37 | C241T,C292T,G663T,C913T,T1837C,C3037T,C3267T,C5388A,C5986T,76954C,C14408T,C14676T,C15279T,T16176C,T16563A,A23063T,C23170T,C23271A,A23403G,C23604A,C23709T,T24506G,G24914C,A25336C,C25626T,C27972T,G28048T,A28111G,G28280C,A28281T,T28282A,A28295C,G28881A,G28882A,G28883C,C28977T,C29762T                             | N:D3L:N:N8H,N:R203K,N:G204R,N:S235F,ORF1a:G133V,ORF1a:T1001,ORF1a:A1708D,ORF1a:I2230T,ORF1b:P314L,ORF8:Q27*,ORF8:R52I,ORF8:Y73C,ORF9b:K4N,S:N501Y,S:A570D,S:D614G,S:P681H,S:T716I,S:S982A,S:D1118H,S:E1258D                                                                    | 43  |
| hCoV-19/Mexico/TAM-InDRE_FB16033_S2432/2021 | EPI_ISL_2455956 | B.1.1.7 | GRY | 41 | C241T,C913T,C3037T,G3230A,G3231A,T3232A,C3267T,C5388A,C5986T,76954C,G7042T,A10195G,C14120T,C14408T,C14676T,C15279T,C15933T,T16176C,C19602T,G22104C,A23063T,C23271A,A23403G,C23604A,C23709T,T24506G,G24914C,A25336C,A27745G,C27972T,G28048T,G28075T,A28111G,G28280C,A28281T,T28282A,G28881A,G28882A,G28883C,C28977T    | N:D3L:N:R203K,N:G204R,N:S235F,ORF1a:G989K,ORF1a:T1001,ORF1a:A1708D,ORF1a:I2230T,ORF1a:M2259I,ORF1b:P218L,ORF1b:P314L,ORF7a:R118G,ORF8:Q27*,ORF8:R52I,ORF8:C61F,ORF8:Y73C,S:G181A,S:N501Y,S:A570D,S:D614G,S:P681H,S:T716I,S:S982A,S:D1118H,S:E1258D                             | 18  |
| hCoV-19/Mexico/TAM-InDRE_FB16034_S2433/2021 | EPI_ISL_2455957 | B.1.1.7 | GRY | 41 | C241T,C913T,C3037T,C3267T,C5388A,C5986T,76954C,C14408T,C14676T,C15279T,T16176C,C21008T,C21855T,G21974C,A23063T,C23271A,A23403G,C23604A,C23709T,T24506G,G24914C,A25336C,C27643T,C27972T,G28048T,A28111G,G28280C,A28281T,T28282A,A28295C,G28881A,G28882A,G28883C,C28977T                                                | N:D3L:N:N8D,N:R203K,N:G204R,N:S235F,ORF1a:T1001,ORF1a:I730F,ORF1a:T1001,ORF1a:A1708D,ORF1a:I2230T,ORF1a:I3116F,ORF1b:P314L,ORF1b:T2514I,ORF7a:P84S,ORF8:Q27*,ORF8:R52I,ORF8:Y73C,S:S98F,S:D138H,S:N501Y,S:A570D,S:D614G,S:P681H,S:T716I,S:S982A,S:D1118H,S:E1258D              | 127 |
| hCoV-19/Mexico/TAM-InDRE_FB16326_S3938/2021 | EPI_ISL_2858952 | B.1.1.7 | GRY | 37 | C241T,C913T,C3037T,C3267T,C5388A,C5986T,76954C,G7042T,A10195G,C14120T,C14408T,C14676T,C15279T,C15933T,T16176C,A23063T,C23271A,A23403G,C23604A,C23709T,G23811A,T24506G,G24914C,A25336C,A27745G,C27972T,G28048T,T28282A,G28881A,G28882A,G28883C,C28977T                                                                 | N:D3L:N:R203K,N:G204R,N:S235F,ORF1a:T1001,ORF1a:A1708D,ORF1a:I2230T,ORF1a:M2259I,ORF1b:P218L,ORF1b:P314L,ORF7a:R118G,ORF8:Q27*,ORF8:R52I,ORF8:C61F,ORF8:Y73C,S:G181A,S:N501Y,S:A570D,S:D614G,S:P681H,S:T716I,S:S982A,S:D1118H,S:E1258D                                         | 199 |
| hCoV-19/Mexico/TAM-InDRE_FB16329_S3939/2021 | EPI_ISL_2858953 | B.1.1.7 | GRY | 41 | C241T,C913T,C3037T,C3267T,C5388A,C5986T,76954C,G7042T,A10195G,C14120T,C14408T,C14676T,C15279T,C15933T,T16176C,C19602T,G22104C,A23063T,C23271A,A23403G,C23604A,C23709T,T24506G,G24914C,A25336C,A27745G,C27972T,G28048T,G28075T,A28111G,G28280C,A28281T,T28282A,G28881A,G28882A,G28883C,C28977T                         | N:D3L:N:R203K,N:G204R,N:S235F,ORF1a:T1001,ORF1a:A1708D,ORF1a:I2230T,ORF1a:M2259I,ORF1b:P218L,ORF1b:P314L,ORF7a:R118G,ORF8:Q27*,ORF8:R52I,ORF8:C61F,ORF8:Y73C,S:G181A,S:N501Y,S:A570D,S:D614G,S:P681H,S:T716I,S:S982A,S:D1118H,S:E1258D                                         | 224 |
| hCoV-19/Mexico/TAM-InDRE_FB16726_S2771/2021 | EPI_ISL_2533797 | B.1.1.7 | GRY | 62 | C241T,C913T,C3037T,C3267T,C5388A,C5986T,76954C,G7042T,A10195G,C14120T,C14408T,C14676T,C15279T,C15933T,T16176C,C18687T,T21823C,G22103C,C22450T,A23063T,C23271A,A23403G,C23604A,C23709T,T24506G,G24914C,A27038T,A27745G,C27972T,G28048T,G28075T,A28095T,A28111G,G28280C,A28281T,T28282A,G28881A,G28882A,G28883C,C28977T | N:D3L:N:R203K,N:G204R,N:S235F,ORF1a:T1001,ORF1a:A1708D,ORF1a:I2230T,ORF1a:M2259I,ORF1b:P218L,ORF1b:P314L,ORF7a:R118G,ORF8:Q27*,ORF8:R52I,ORF8:C61F,ORF8:K68*,ORF8:Y73C,S:G181R,S:N501Y,S:A570D,S:D614G,S:P681H,S:T716I,S:S982A,S:D1118H                                        | 0   |
| hCoV-19/Mexico/TAM-InDRE_FB16727_S2772/2021 | EPI_ISL_2533798 | B.1.1.7 | GRY | 40 | C241T,C913T,C3037T,C3267T,C5388A,C5986T,76954C,G7042T,A10195G,C14120T,C14408T,C14676T,C15279T,C15933T,T16176C,A23063T,C23271A,A23403G,C23604A,C23709T,T24506G,G24914C,A27745G,C27972T,G28048T,A28095T,A28111G,G28280C,A28281T,T28282A,G28881A,G28882A,G28883C,C28977T                                                 | N:D3L:N:R203K,N:G204R,N:S235F,ORF1a:D571Y,ORF1a:T1001,ORF1a:I2230T,ORF1a:I3116F,ORF1b:P314L,ORF7a:R118G,ORF8:Q27*,ORF8:R52I,ORF8:C61F,ORF8:K68*,ORF8:Y73C,S:N501Y,S:A570D,S:D614G,S:P681H,S:T716I,S:S982A,S:D1118H                                                             | 0   |
| hCoV-19/Mexico/TAM-InDRE_FB16728_S2773/2021 | EPI_ISL_2533799 | B.1.1.7 | GRY | 38 | C241T,C913T,C3037T,C3267T,C5388A,C5986T,76954C,G7042T,A10195G,C14120T,C14408T,C14676T,C15279T,C15933T,T16176C,C22450T,A23063T,C23271A,A23403G,C23604A,C23709T,T24506G,G24914C,A27745G,C27972T,G28048T,G28075T,A28095T,A28111G,G28280C,A28281T,T28282A,G28881A,G28882A,G28883C,C28977T                                 | N:D3L:N:R203K,N:G204R,N:S235F,ORF1a:T403I,ORF1a:T1001,ORF1a:A1708D,ORF1a:I2230T,ORF1a:M2259I,ORF1b:P218L,ORF1b:P314L,ORF3a:D155Y,ORF7a:Q62*,ORF7a:R118G,ORF8:Q27*,ORF8:R52I,ORF8:C61F,ORF8:K68*,ORF8:Y73C,S:S12F,S:N501Y,S:A570D,S:D614G,S:P681H,S:T716I,S:S982A,S:D1118H      | 0   |
| hCoV-19/Mexico/TAM-InDRE_FB16734_S2775/2021 | EPI_ISL_2533801 | B.1.1.7 | GRY | 40 | C241T,C913T,C3037T,C3267T,C5388A,C5986T,76954C,G7042T,A10195G,C14120T,C14408T,C14676T,C15279T,C15933T,T16176C,C21597T,A23063T,C23271A,A23403G,C23604A,C23709T,T24506G,G24914C,G25855T,G26774T,C27577T,A27745G,C27972T,G28048T,G28075T,A28095T,A28111G,G28280C,A28281T,T28282A,G28881A,G28882A,G28883C,C28977T         | N:D3L:N:R203K,N:G204R,N:S235F,ORF1a:T1001,ORF1a:A1708D,ORF1a:I2230T,ORF1a:M2259I,ORF1b:P218L,ORF1b:P314L,ORF7a:R118G,ORF8:Q27*,ORF8:R52I,ORF8:C61F,ORF8:K68*,ORF8:Y73C,S:N501Y,S:A570D,S:D614G,S:P681H,S:T716I,S:S982A,S:D1118H                                                | 0   |
| hCoV-19/Mexico/TAM-InDRE_FB17060_S3083/2021 | EPI_ISL_2663350 | B.1.1.7 | GRY | 40 | C241T,C913T,C3037T,C3267T,C5388A,C5986T,76954C,G7042T,A10195G,C14120T,C14408T,C14676T,C15279T,C15933T,T16176C,C21597T,A23063T,C23271A,A23403G,C23604A,C23709T,T24506G,G24914C,G25855T,G26774T,C27577T,A27745G,C27972T,G28048T,G28075T,A28095T,A28111G,G28280C,A28281T,T28282A,G28881A,G28882A,G28883C,C28977T         | N:D3L:N:R203K,N:G204R,N:S235F,ORF1a:T1001,ORF1a:A1708D,ORF1a:I2230T,ORF1a:M2259I,ORF1b:P218L,ORF1b:P314L,ORF3a:D155Y,ORF7a:Q62*,ORF7a:R118G,ORF8:Q27*,ORF8:R52I,ORF8:C61F,ORF8:K68*,ORF8:Y73C,S:N501Y,S:A570D,S:D614G,S:P681H,S:T716I,S:S982A,S:D1118H                         | 0   |
| hCoV-19/Mexico/TAM-InDRE_FB17076_S3133/2021 | EPI_ISL_2663400 | B.1.1.7 | GRY | 39 | C241T,C913T,C3037T,C3267T,C5388A,C5986T,76954C,G7042T,A10195G,C14120T,C14408T,C14676T,C15279T,C15933T,T16176C,A23063T,C23271A,A23403G,C23604A,C23709T,T24506G,G24914C,C26110T,A27745G,C27972T,G28048T,G28075T,A28095T,A28111G,G28280C,A28281T,T28282A,G28881A,G28882A,G28883C,C28977T                                 | N:D3L:N:R203K,N:G204R,N:S235F,ORF1a:T1001,ORF1a:A1708D,ORF1a:I2230T,ORF1a:M2259I,ORF1b:P218L,ORF1b:P314L,ORF3a:D155Y,ORF7a:Q62*,ORF7a:R118G,ORF8:Q27*,ORF8:R52I,ORF8:C61F,ORF8:K68*,ORF8:Y73C,S:N501Y,S:A570D,S:D614G,S:P681H,S:T716I,S:S982A,S:D1118H                         | 0   |
| hCoV-19/Mexico/TAM-InDRE_FB17077_S3134/2021 | EPI_ISL_2663401 | B.1.1.7 | GRY | 40 | C241T,C913T,C3037T,C3267T,C5388A,C5986T,76954C,G7042T,A10195G,C14120T,C14408T,C14676T,C15279T,C15933T,T16176C,C16869T,A23063T,C23271A,A23403G,C23604A,C23709T,T24506G,G24914C,C25792T,A27745G,C27972T,G28048T,G28075T,A28095T,A28111G,G28280C,A28281T,T28282A,G28881A,G28882A,G28883C,C28977T,C29422C                 | N:D3L:N:N8H,N:R203K,N:G204R,N:S235F,ORF1a:T1001,ORF1a:A1708D,ORF1a:I2230T,ORF1b:P314L,ORF7a:V24F,ORF8:Q27*,ORF8:R52I,ORF8:Y73C,ORF9b:K4N,S:N501Y,S:A570D,S:D614G,S:P681H,S:T716I,S:S982A,S:D1118H                                                                              | 0   |
| hCoV-19/Mexico/TAM-InDRE_FB17417_S3927/2021 | EPI_ISL_2858941 | B.1.1.7 | GRY | 35 | C241T,C913T,C3037T,C3267T,C5388A,C5986T,76954C,G7042T,A10195G,C14120T,C14408T,C14676T,C15279T,T16176C,G17511A,A23063T,C23271A,A23403G,C23604A,C23709T,T24506G,G24914C,A25336C,C27972T,G28048T,G28075T,A28111G,G28280C,A28281T,T28282A,G28881A,G28882A,G28883C                                                         | N:D3L:N:R203K,N:G204R,N:S235F,ORF1a:P271S,ORF1a:T1001,ORF1a:A1708D,ORF1a:I2230T,ORF1a:M2259I,ORF1b:P218L,ORF1b:P314L,ORF8:Q27*,ORF8:R52I,ORF8:C61F,ORF8:Y73C,S:N501Y,S:A570D,S:D614G,S:P681H,S:T716I,S:S982A,S:D1118H                                                          | 0   |
| hCoV-19/Mexico/TAM-InDRE_FB17423_S3928/2021 | EPI_ISL_2858942 | B.1.1.7 | GRY | 43 | C241T,C913T,C3037T,C3267T,C5388A,C5986T,76954C,C14408T,C14676T,C15279T,T16176C,T16563A,T22861C,A23063T,C23170T,C23271A,A23403G,C23604A,C23709T,T24506G,G24914C,C25626T,G27463T,C27972T,G28048T,A28111G,G28280C,A28281T,T28282A,A28295C,G28881A,G28882A,G28883C,C28977T                                                | N:D3L:N:R203K,N:G204R,N:S235F,ORF1a:T1001,ORF1a:A1708D,ORF1a:I2230T,ORF1a:M2259I,ORF1b:P218L,ORF1b:P314L,ORF7a:R118G,ORF8:Q27*,ORF8:R52I,ORF8:C61F,ORF8:K68*,ORF8:Y73C,S:N501Y,S:A570D,S:D614G,S:P681H,S:T716I,S:S982A,S:D1118H,S:E1258D                                       | 0   |



|                                             |                 |         |     |    |                                                                                                                                                                                                                                                                                                                                           |                                                                                                                                                                                                                                         |                                                                                                                                                                                                                                                                       |   |   |
|---------------------------------------------|-----------------|---------|-----|----|-------------------------------------------------------------------------------------------------------------------------------------------------------------------------------------------------------------------------------------------------------------------------------------------------------------------------------------------|-----------------------------------------------------------------------------------------------------------------------------------------------------------------------------------------------------------------------------------------|-----------------------------------------------------------------------------------------------------------------------------------------------------------------------------------------------------------------------------------------------------------------------|---|---|
| hCoV-19/Mexico/TAM-InDRE_FB17425_S3929/2021 | EPI_ISL_2858943 | B.1.1.7 | GRY | 41 | C241T,C913T,C2110T,C3037T,C3267T,C5388A,C5986T,T6954C,G7042T,A10195G,C14120T,C14184T,C14408T,C14676T,C15279T,C15933T,T16176C,C21597T,A23063T,C23271A,A23403G,C23604A,C23709T,T24506G,G24914C,A25336T,C25710T,G25855T,A27745G,G27762T,C27972T,G28048T,G28075T,A28111G,G28280C,A28281T,T28282A,G28881A,G28882A,G28883C,C28977T              | N:D3L:N:R203K,N:G204R,N:S235F,ORF1a:T1001,ORF1a:A1708D,ORF1a:I2230T,ORF1a:M2259I,ORF1b:P218L,ORF1b:P314L,ORF7a:R118G,ORF7b:E3*,ORF8:Q27*,ORF8:R52I,ORF8:C61F,ORF8:Y73C,S:G181R,S:N501Y,S:A570D,S:D614G,S:P681H,S:T716I,S:S982A,S:D1118H | 6                                                                                                                                                                                                                                                                     | 0 |   |
| hCoV-19/Mexico/TAM-InDRE_FB17463_S3487/2021 | EPI_ISL_2779002 | B.1.1.7 | GRY | 43 | 8977T,C29670T                                                                                                                                                                                                                                                                                                                             | 25                                                                                                                                                                                                                                      | N:D3L:N:R203K,N:G204R,N:S235F,ORF1a:T1001,ORF1a:A1708D,ORF1a:I2230T,ORF1a:M2259I,ORF1b:P218L,ORF1b:P314L,ORF7a:R118G,ORF7b:E3*,ORF8:Q27*,ORF8:R52I,ORF8:C61F,ORF8:Y73C,S:G181R,S:N501Y,S:A570D,S:D614G,S:P681H,S:T716I,S:S982A,S:D1118H                               | 6 | 0 |
| hCoV-19/Mexico/TAM-InDRE_FB17466_S3488/2021 | EPI_ISL_2779003 | B.1.1.7 | GRY | 43 | C110T,C241T,C913T,C2110T,C3037T,C3267T,C3543T,C5388A,C5986T,T6954C,G7042T,A10195G,C10341T,C14120T,C14408T,C14676T,C15279T,T16176C,A17113G,C20451T,A23063T,C23271A,A23403G,C23604A,C23709T,T24506G,G24872T,G24914C,A25336C,G25337C,C26645T,C27972T,G28048T,G28075T,A28111G,G28280C,A28281T,T28282A,C28603T,G28881A,G28882A,G28883C,C28977T | 27                                                                                                                                                                                                                                      | N:D3L:N:R203K,N:G204R,N:S235F,ORF1a:T1001,ORF1a:I2230T,ORF1a:M2259I,ORF1b:P218L,ORF1b:P314L,ORF7a:R118G,ORF7b:E3*,ORF8:Q27*,ORF8:R52I,ORF8:C61F,ORF8:Y73C,S:G181R,S:N501Y,S:A570D,S:D614G,S:P681H,S:T716I,S:S982A,S:D1118H                                            | 6 | 0 |
| hCoV-19/Mexico/TAM-InDRE_FB17471_S3489/2021 | EPI_ISL_2779004 | B.1.1.7 | GRY | 47 | A,G28881A,G28882A,G28883C,C28977T,G29543T                                                                                                                                                                                                                                                                                                 | 25                                                                                                                                                                                                                                      | N:D3L:N:R203K,N:G204R,N:S235F,ORF1a:T1001,ORF1a:I2230T,ORF1a:M2259I,ORF1b:P218L,ORF1b:P314L,ORF7a:R118G,ORF7b:E3*,ORF8:Q27*,ORF8:R52I,ORF8:C61F,ORF8:Y73C,S:G181R,S:N501Y,S:A570D,S:D614G,S:P681H,S:T716I,S:S982A,S:D1118H,S:E1258D,S:D1259H                          | 6 | 0 |
| hCoV-19/Mexico/TAM-InDRE_FB18098_S3951/2021 | EPI_ISL_2858965 | B.1.1.7 | GRY | 41 | T201A,C241T,C913T,C2110T,C3037T,C3267T,A5116G,C5388A,C5986T,C6388T,T6954C,G7042T,A10195G,C11224T,G11335A,C14120T,C14408T,C14676T,A14856G,C15279T,T16176C,G17511A,A23063T,C23271A,A23403G,C23604A,C23709T,T24506G,G24914C,C27972T,G28048T,G28075T,A28095T,A28111G,G28280C,A28281T,T28282A,G28881A,G28882A,G28883C,C28977T                  | 23                                                                                                                                                                                                                                      | N:D3L:N:R203K,N:G204R,N:S235F,ORF1a:T1001,ORF1a:I2230T,ORF1a:M2259I,ORF1b:P218L,ORF1b:P314L,ORF7a:R118G,ORF7b:E3*,ORF8:Q27*,ORF8:R52I,ORF8:C61F,ORF8:Y73C,S:N501Y,S:A570D,S:D614G,S:P681H,S:T716I,S:S982A,S:D1118H                                                    | 6 | 0 |
| hCoV-19/Mexico/TAM-InDRE_FB18103_S3952/2021 | EPI_ISL_2858966 | B.1.1.7 | GRY | 37 | 81T,T28282A,G28881A,G28882A,G28883C,C28977T                                                                                                                                                                                                                                                                                               | 24                                                                                                                                                                                                                                      | N:D3L:N:R203K,N:G204R,N:S235F,ORF1a:T1001,ORF1a:I2230T,ORF1a:M2259I,ORF1b:P218L,ORF1b:P314L,ORF7a:R118G,ORF7b:E3*,ORF8:Q27*,ORF8:R52I,ORF8:C61F,ORF8:Y73C,S:N501Y,S:A570D,S:D614G,S:P681H,S:T716I,S:S982A,S:D1118H                                                    | 6 | 0 |
| hCoV-19/Mexico/TAM-InDRE_FB18104_S3953/2021 | EPI_ISL_2858967 | B.1.1.7 | GRY | 39 | 80C,A28281T,T28282A,G28487A,G28881A,G28882A,G28883C,C28977T                                                                                                                                                                                                                                                                               | 25                                                                                                                                                                                                                                      | N:D3L:N:R203K,N:G204R,N:S235F,ORF1a:T1001,ORF1a:I2230T,ORF1a:M2259I,ORF1b:P218L,ORF1b:P314L,ORF7a:R118G,ORF7b:E3*,ORF8:Q27*,ORF8:R52I,ORF8:C61F,ORF8:Y73C,S:N501Y,S:A570D,S:D614G,S:P681H,S:T716I,S:S982A,S:D1118H                                                    | 6 | 0 |
| hCoV-19/Mexico/TAM-InDRE_FB18105_S3954/2021 | EPI_ISL_2858968 | B.1.1.7 | GRY | 39 | 11G,G28280C,A28281T,T28282A,G28881A,G28882A,G28883C,C28977T                                                                                                                                                                                                                                                                               | 27                                                                                                                                                                                                                                      | N:D3L:N:R203K,N:G204R,N:S235F,ORF1a:T1001,ORF1a:I2230T,ORF1a:M2259I,ORF1b:P218L,ORF1b:P314L,ORF7a:R118G,ORF7b:E3*,ORF8:Q27*,ORF8:R52I,ORF8:C61F,ORF8:Y73C,S:N501Y,S:A570D,S:D614G,S:P681H,S:T716I,S:S982A,S:D1118H                                                    | 6 | 0 |
| hCoV-19/Mexico/TAM-InDRE_FB18106_S3955/2021 | EPI_ISL_2858969 | B.1.1.7 | GRY | 41 | 95T,A28111G,G28280C,A28281T,T28282A,G28881A,G28882A,G28883C,C28977T                                                                                                                                                                                                                                                                       | 27                                                                                                                                                                                                                                      | N:D3L:N:R203K,N:G204R,N:S235F,ORF1a:T1001,ORF1a:I2230T,ORF1a:M2259I,ORF1b:P218L,ORF1b:P314L,ORF7a:R118G,ORF7b:E3*,ORF8:Q27*,ORF8:R52I,ORF8:C61F,ORF8:Y73C,S:N501Y,S:A570D,S:D614G,S:P681H,S:T716I,S:S982A,S:D1118H                                                    | 6 | 0 |
| hCoV-19/Mexico/TAM-InDRE_FB18115_S3956/2021 | EPI_ISL_2858970 | B.1.1.7 | GRY | 38 | 280C,A28281T,T28282A,G28881A,G28882A,G28883C,C28977T                                                                                                                                                                                                                                                                                      | 24                                                                                                                                                                                                                                      | N:D3L:N:R203K,N:G204R,N:S235F,ORF1a:T1001,ORF1a:I2230T,ORF1a:M2259I,ORF1b:P218L,ORF1b:P314L,ORF7a:R118G,ORF7b:E3*,ORF8:Q27*,ORF8:R52I,ORF8:C61F,ORF8:Y73C,S:G181R,S:N501Y,S:A570D,S:D614G,S:P681H,S:T716I,S:S982A,S:D1118H                                            | 6 | 0 |
| hCoV-19/Mexico/TAM-InDRE_FB18116_S3957/2021 | EPI_ISL_2858971 | B.1.1.7 | GRY | 40 | A156G,C241T,C913T,C2110T,C3037T,C3267T,C5388A,C5986T,T6954C,G7042T,A10195G,C14120T,C14408T,C14676T,C15279T,C15933T,T16176C,C22450T,A23063T,C23271A,A23403G,C23604A,C23709T,T24506G,G24620T,G24914C,A27745G,C27972T,G28048T,G28075T,A28095T,A28111G,G28280C,A28281T,T28282A,G28881A,G28882A,G28883C,C28977T                                | 24                                                                                                                                                                                                                                      | N:D3L:N:R203K,N:G204R,N:S235F,ORF1a:T1001,ORF1a:I2230T,ORF1a:M2259I,ORF1b:P218L,ORF1b:P314L,ORF7a:R118G,ORF7b:E3*,ORF8:Q27*,ORF8:R52I,ORF8:C61F,ORF8:Y73C,S:N501Y,S:A570D,S:D614G,S:P681H,S:T716I,S:S982A,S:A1020S,S:D1118H                                           | 7 | 0 |
| hCoV-19/Mexico/TAM-InDRE_FB18133_S4122/2021 | EPI_ISL_2920693 | B.1.1.7 | GRY | 40 | C241T,C913T,C2110T,C3037T,C3267T,C5388A,C5986T,T6954C,G7042T,A10195G,C14120T,C14408T,C14676T,C15279T,C15933T,T16176C,C22450T,A23063T,C23271A,A23403G,C23604A,C23709T,T24506G,G24914C,A25336C,G25337C,A27745G,C27972T,G28048T,G28075T,A28111G,G28280C,A28281T,T28282A,G28881A,G28882A,G28883C,C28977T                                      | 25                                                                                                                                                                                                                                      | N:D3L:N:R203K,N:G204R,N:S235F,ORF1a:T1001,ORF1a:I2230T,ORF1a:M2259I,ORF1b:P218L,ORF1b:P314L,ORF7a:R118G,ORF7b:E3*,ORF8:Q27*,ORF8:R52I,ORF8:C61F,ORF8:Y73C,S:N501Y,S:A570D,S:D614G,S:P681H,S:T716I,S:S982A,S:D1118H                                                    | 6 | 0 |
| hCoV-19/Mexico/TAM-InDRE_FB18134_S4123/2021 | EPI_ISL_2920694 | B.1.1.7 | GRY | 41 | 8T,G28075T,A28111G,G28280C,A28281T,T28282A,G28881A,G28882A,G28883C,C28977T                                                                                                                                                                                                                                                                | 26                                                                                                                                                                                                                                      | N:D3L:N:R203K,N:G204R,N:S235F,ORF1a:T1001,ORF1a:I2230T,ORF1a:M2259I,ORF1b:P218L,ORF1b:P314L,ORF7a:R118G,ORF7b:E3*,ORF8:Q27*,ORF8:R52I,ORF8:C61F,ORF8:Y73C,S:G181R,S:N501Y,S:A570D,S:D614G,S:P681H,S:T716I,S:S982A,S:D1118H,S:E1258D,S:D1259H                          | 6 | 0 |
| hCoV-19/Mexico/TAM-InDRE_FB18137_S4124/2021 | EPI_ISL_2920695 | B.1.1.7 | GRY | 41 | 048T,G28075T,A28111G,G28280C,A28281T,T28282A,G28881A,G28882A,G28883C,C28977T                                                                                                                                                                                                                                                              | 27                                                                                                                                                                                                                                      | N:D3L:N:R203K,N:G204R,N:S235F,ORF1a:T1001,ORF1a:I2230T,ORF1a:M2259I,ORF1b:P218L,ORF1b:P314L,ORF7a:R118G,ORF7b:E3*,ORF8:Q27*,ORF8:R52I,ORF8:C61F,ORF8:Y73C,S:G181R,S:N501Y,S:A570D,S:D614G,S:P681H,S:T716I,S:S982A,S:D1118H                                            | 6 | 0 |
| hCoV-19/Mexico/TAM-InDRE_FB18138_S4125/2021 | EPI_ISL_2920696 | B.1.1.7 | GRY | 44 | 25337C,C27972T,G28048T,G28075T,A28111G,G28280C,A28281T,T28282A,G28881A,G28882A,G28883C,C28977T                                                                                                                                                                                                                                            | 24                                                                                                                                                                                                                                      | N:D3L:N:R203K,N:G204R,N:S235F,ORF1a:T1001,ORF1a:I2230T,ORF1a:M2259I,ORF1b:P218L,ORF1b:P314L,ORF7a:R118G,ORF7b:E3*,ORF8:Q27*,ORF8:R52I,ORF8:C61F,ORF8:Y73C,S:N501Y,S:A570D,S:D614G,S:P681H,S:T716I,S:S982A,S:D1118H,S:E1258D,S:D1259H                                  | 6 | 0 |
| hCoV-19/Mexico/TAM-InDRE_FB18142_S4126/2021 | EPI_ISL_2920697 | B.1.1.7 | GRY | 41 | 7972T,G28048T,G28075T,A28111G,G28280C,A28281T,T28282A,G28881A,G28882A,G28883C,C28977T                                                                                                                                                                                                                                                     | 26                                                                                                                                                                                                                                      | N:D3L:N:R203K,N:G204R,N:S235F,ORF1a:T1001,ORF1a:I2230T,ORF1a:M2259I,ORF1b:P218L,ORF1b:P314L,ORF7a:R118G,ORF7b:E3*,ORF8:Q27*,ORF8:R52I,ORF8:C61F,ORF8:Y73C,S:G181R,S:N501Y,S:A570D,S:D614G,S:P681H,S:T716I,S:S982A,S:D1118H,S:E1258D,S:D1259H                          | 6 | 0 |
| hCoV-19/Mexico/TAM-InDRE_FB18143_S4127/2021 | EPI_ISL_2920698 | B.1.1.7 | GRY | 40 | 8075T,A28111G,G28280C,A28281T,T28282A,G28881A,G28882A,G28883C,C28977T                                                                                                                                                                                                                                                                     | 26                                                                                                                                                                                                                                      | N:D3L:N:R203K,N:G204R,N:S235F,ORF1a:T1001,ORF1a:I2230T,ORF1a:M2259I,ORF1b:P218L,ORF1b:P314L,ORF7a:R118G,ORF7b:E3*,ORF8:Q27*,ORF8:R52I,ORF8:C61F,ORF8:Y73C,S:G181R,S:N501Y,S:A570D,S:D614G,S:P681H,S:T716I,S:S982A,S:D1118H,S:E1258D,S:D1259H                          | 6 | 0 |
| hCoV-19/Mexico/TAM-InDRE_FB18144_S4128/2021 | EPI_ISL_2920699 | B.1.1.7 | GRY | 40 | 8111G,G28280C,A28281T,T28282A,G28881A,G28882A,G28883C,C28977T                                                                                                                                                                                                                                                                             | 26                                                                                                                                                                                                                                      | N:D3L:N:R203K,N:G204R,N:S235F,ORF1a:T1001,ORF1a:I2230T,ORF1a:M2259I,ORF1b:P218L,ORF1b:P314L,ORF7a:R118G,ORF7b:E3*,ORF8:Q27*,ORF8:R52I,ORF8:C61F,ORF8:Y73C,S:G181R,S:N501Y,S:A570D,S:D614G,S:P681H,S:T716I,S:S982A,S:D1118H,S:A846V,S:S982A,S:D1118H,S:E1258D,S:D1259H | 6 | 0 |



|                                             |                 |         |     |    |                                                                                                                                                                                                                                                                                                                                   |                                                                                                                                                                                                           |    |      |
|---------------------------------------------|-----------------|---------|-----|----|-----------------------------------------------------------------------------------------------------------------------------------------------------------------------------------------------------------------------------------------------------------------------------------------------------------------------------------|-----------------------------------------------------------------------------------------------------------------------------------------------------------------------------------------------------------|----|------|
| hCoV-19/Mexico/VER-InDRE_FB14026_S1753/2021 | EPI_ISL_2101892 | B.1.1.7 | GRY | 35 | C241T,C913T,C2453T,C3037T,C3267T,C5388A,C5986T,T6954C,C9611T,C14408T,C14676T,C15279T,T16176C,C21855T,G21974T,C23063T,C23271A,A23403G,C23604A,C23709T,T24506G,G24914C,C27643T,C27972T,G28048T,A28111G,G28280C,A28281T,T28282A,A28295G,A28626G,G2881A,G28882A,G28883C,C28977T                                                       | N:D3L:N:R203K:N:G204R,N:S235F,ORF1aL730F,ORF1aT1001,ORF1aA1708D,ORF1aI2230T,ORF1aI3116F,ORF1bP314L,ORF7aP84S,ORF8:Q27*,ORF8:R52I,ORF8:Y73C,S:N501Y,S:A570D,S:D614G,S:P681H,S:T716I,S:S982A,S:D1118H       | 6  | 0    |
| hCoV-19/Mexico/VER-INDRE_FB17431_S3930/2021 | EPI_ISL_2858944 | B.1.1.7 | GRY | 38 | C241T,C913T,C2110T,G3004T,C3037T,C3267T,C5388A,C5986T,T6954C,G7042T,C10525T,C10789T,C14120T,T24506G,G24914C,C26110T,C26735T,C27972T,G28048T,A28111G,G28280C,A28281T,T28282A,A28295G,G2881A,G28882A,G28883C,C28977T                                                                                                                | N:D3L:N:R203K:N:G204R,N:S235F,ORF1aL730F,ORF1aT1001,ORF1aA1708D,ORF1aI2230T,ORF1aI3116F,ORF1bP314L,ORF7aP84S,ORF8:Q27*,ORF8:R52I,ORF8:Y73C,S:N501Y,S:A570D,S:D614G,S:P681H,S:T716I,S:S982A,S:D1118H       | 23 | 0    |
| hCoV-19/Mexico/VER-INDRE_FB17434_S3931/2021 | EPI_ISL_2858945 | B.1.1.7 | GRY | 38 | C241T,C913T,C2453T,C3037T,C3267T,C3695T,C5388A,C5986T,T6954C,C9611T,C14408T,C14676T,C15279T,T16176C,C21008T,C21855T,G21974C,A23063T,C23271A,A23403G,C23604A,C23709T,T24506G,G24914C,A25336C,G26529T,C27643T,C27972T,G28048T,A28111G,G28280C,A28281T,T28282A,A28295G,G2881A,G28882A,G28883C,C28977T                                | M:D3Y:N:D3L:N:R203K:N:G204R,N:S235F,ORF1aL730F,ORF1aT1001,ORF1aA1708D,ORF1aI2230T,ORF1aI3116F,ORF1bP314L,ORF7aP84S,ORF8:Q27*,ORF8:R52I,ORF8:Y73C,S:N501Y,S:A570D,S:D614G,S:P681H,S:T716I,S:S982A,S:D1118H | 27 | 0    |
| hCoV-19/Mexico/VER-INMEGEN-05-06-207/2021   | EPI_ISL_2603696 | B.1.1.7 | GR  | 38 | TJ28282A,A28295G,G2881A,G28882A,G28883C,C28977T                                                                                                                                                                                                                                                                                   | N:D3L:N:R203K:N:G204R,N:S235F,ORF1aL730F,ORF1aT1001,ORF1aA1708D,ORF1aI2230T,ORF1aI3116F,ORF1bP314L,ORF7aP84S,ORF8:Q27*,ORF8:R52I,ORF8:Y73C,S:N501Y,S:A570D,S:D614G,S:P681H,S:T716I,S:S982A,S:D1118H       | 27 | 724  |
| hCoV-19/Mexico/VER-INMEGEN-05-06-231/2021   | EPI_ISL_2603713 | B.1.1.7 | GR  | 39 | OC,A28281T,T28282A,A28804G,G2881A,G28882A,G28883C,C28977T                                                                                                                                                                                                                                                                         | N:D3L:N:R203K:N:G204R,N:S235F,ORF1aL730F,ORF1aT1001,ORF1aA1708D,ORF1aI2230T,ORF1aI3116F,ORF1bP314L,ORF7aP84S,ORF8:Q27*,ORF8:R52I,ORF8:Y73C,S:N501Y,S:A570D,S:D614G,S:P681H,S:T716I,S:S982A,S:D1118H       | 24 | 1446 |
| hCoV-19/Mexico/VER-INMEGEN-05-06-246/2021   | EPI_ISL_2681841 | B.1.1.7 | GR  | 36 | C241T,C913T,C2110T,G3004T,C3037T,C3267T,C5388A,C5986T,T6954C,G7042T,C10525T,T10789T,C14120T,C14408T,C14676T,C15279T,T16176C,C21008T,C21855T,G21974C,C23271A,A23403G,C23604A,C23709T,T24506G,G24914C,C27972T,G28048T,A28111G,G28280C,A28281T,T28282A,A28295G,G2881A,G28882A,G28883C,C28977T                                        | N:D3L:N:R203K:N:G204R,N:S235F,ORF1aL730F,ORF1aT1001,ORF1aA1708D,ORF1aI2230T,ORF1aI3116F,ORF1bP314L,ORF7aP84S,ORF8:Q27*,ORF8:R52I,ORF8:Y73C,S:N501Y,S:A570D,S:D614G,S:P681H,S:T716I,S:S982A,S:D1118H       | 25 | 2281 |
| hCoV-19/Mexico/VER-INMEGEN-05-06-254/2021   | EPI_ISL_2603725 | B.1.1.7 | GRY | 40 | C241T,C913T,C3037T,C2110T,G3004T,C3037T,C3267T,C5388A,C5986T,T6954C,G7042T,C10525T,T10789T,C14120T,C14408T,C14676T,C15279T,T16176C,C21008T,C21855T,G21974C,C23271A,A23403G,C23604A,C23709T,T24506G,G24914C,C25844T,C26110T,C26735T,C27972T,G28048T,A28095T,A28111G,G28280C,A28281T,T28282A,A28295G,G2881A,G28882A,G28883C,C28977T | N:D3L:N:R203K:N:G204R,N:S235F,ORF1aL730F,ORF1aT1001,ORF1aA1708D,ORF1aI2230T,ORF1aI3116F,ORF1bP314L,ORF7aP84S,ORF8:Q27*,ORF8:R52I,ORF8:Y73C,S:N501Y,S:A570D,S:D614G,S:P681H,S:T716I,S:S982A,S:D1118H       | 24 | 0    |
| hCoV-19/Mexico/VER-INMEGEN-05-06-255/2021   | EPI_ISL_2603726 | B.1.1.7 | GRY | 34 | OC,A28281T,T28282A,A28804G,G2881A,G28882A,G28883C,C28977T                                                                                                                                                                                                                                                                         | N:D3L:N:R203K:N:G204R,N:S235F,ORF1aL730F,ORF1aT1001,ORF1aA1708D,ORF1aI2230T,ORF1aI3116F,ORF1bP314L,ORF7aP84S,ORF8:Q27*,ORF8:R52I,ORF8:Y73C,S:N501Y,S:A570D,S:D614G,S:P681H,S:T716I,S:S982A,S:D1118H       | 21 | 152  |
| hCoV-19/Mexico/VER-INMEGEN-06-01-368/2021   | EPI_ISL_2616973 | B.1.1.7 | GRY | 42 | TJ28282A,A28295G,G2881A,G28882A,G28883C,C28977T                                                                                                                                                                                                                                                                                   | N:D3L:N:R203K:N:G204R,N:S235F,ORF1aL730F,ORF1aT1001,ORF1aA1708D,ORF1aI2230T,ORF1aI3116F,ORF1bP314L,ORF7aP84S,ORF8:Q27*,ORF8:R52I,ORF8:Y73C,S:N501Y,S:A570D,S:D614G,S:P681H,S:T716I,S:S982A,S:D1118H       | 26 | 0    |
| hCoV-19/Mexico/VER-INMEGEN-06-02-173/2021   | EPI_ISL_2692689 | B.1.1.7 | GRY | 40 | C241T,C913T,C2110T,G3004T,C3037T,C3267T,C5388A,C5986T,T6954C,G7042T,C9996T,C10525T,T10789T,C14120T,C14408T,C14676T,C15279T,T16176C,C21008T,C21855T,G21974C,C23271A,A23403G,C23604A,C23709T,T24506G,G24914C,C25844T,C26110T,C26735T,C27972T,G28048T,A28111G,G28280C,A28281T,T28282A,A28295G,G2881A,G28882A,G28883C,C28977T         | N:D3L:N:R203K:N:G204R,N:S235F,ORF1aL730F,ORF1aT1001,ORF1aA1708D,ORF1aI2230T,ORF1aI3116F,ORF1bP314L,ORF7aP84S,ORF8:Q27*,ORF8:R52I,ORF8:Y73C,S:N501Y,S:A570D,S:D614G,S:P681H,S:T716I,S:S982A,S:D1118H       | 25 | 34   |
| hCoV-19/Mexico/VER-INMEGEN-06-02-372/2021   | EPI_ISL_2692848 | B.1.1.7 | GRY | 37 | AJ28295G,G2881A,G28882A,G28883C,C28977T                                                                                                                                                                                                                                                                                           | N:D3L:N:R203K:N:G204R,N:S235F,ORF1aL730F,ORF1aT1001,ORF1aA1708D,ORF1aI2230T,ORF1aI3116F,ORF1bP314L,ORF7aP84S,ORF8:Q27*,ORF8:R52I,ORF8:Y73C,S:N501Y,S:A570D,S:D614G,S:P681H,S:T716I,S:S982A,S:D1118H       | 26 | 375  |
| hCoV-19/Mexico/VER-INMEGEN-06-02-373/2021   | EPI_ISL_2692849 | B.1.1.7 | GRY | 41 | TJ28282A,A28295G,G2881A,G28882A,G28883C,C28977T                                                                                                                                                                                                                                                                                   | N:D3L:N:R203K:N:G204R,N:S235F,ORF1aL730F,ORF1aT1001,ORF1aA1708D,ORF1aI2230T,ORF1aI3116F,ORF1bP314L,ORF7aP84S,ORF8:Q27*,ORF8:R52I,ORF8:Y73C,S:N501Y,S:A570D,S:D614G,S:P681H,S:T716I,S:S982A,S:D1118H       | 24 | 762  |
| hCoV-19/Mexico/VER-INMEGEN-06-02-374/2021   | EPI_ISL_2692850 | B.1.1.7 | GR  | 39 | OC,A28281T,T28282A,A28804G,G2881A,G28882A,G28883C,C28977T                                                                                                                                                                                                                                                                         | N:D3L:N:R203K:N:G204R,N:S235F,ORF1aL730F,ORF1aT1001,ORF1aA1708D,ORF1aI2230T,ORF1aI3116F,ORF1bP314L,ORF7aP84S,ORF8:Q27*,ORF8:R52I,ORF8:Y73C,S:N501Y,S:A570D,S:D614G,S:P681H,S:T716I,S:S982A,S:D1118H       | 27 | 857  |
| hCoV-19/Mexico/VER-INMEGEN-06-02-375/2021   | EPI_ISL_2692851 | B.1.1.7 | GR  | 40 | C203T,C241T,C913T,G1820A,C3037T,C3267T,G5023T,C5388A,G5924A,C5986T,C6317T,T6954C,G9526T,A12162G,A13712G,C14408T,C14676T,C15279T,C15720T,T16176C,A17615G,A21137G,C23248T,C23271A,A23403G,C23604A,C23709T,T24506G,G24914C,G25135T,C27972T,G28048T,A28111G,G28280C,A28281T,T28282A,G2881A,G28882A,G28883C,C28977T                    | N:D3L:N:R203K:N:G204R,N:S235F,ORF1aL730F,ORF1aT1001,ORF1aA1708D,ORF1aI2230T,ORF1aI3116F,ORF1bP314L,ORF7aP84S,ORF8:Q27*,ORF8:R52I,ORF8:Y73C,S:N501Y,S:A570D,S:D614G,S:P681H,S:T716I,S:S982A,S:D1118H       | 27 | 857  |
| hCoV-19/Mexico/VER-INMEGEN-06-02-376/2021   | EPI_ISL_2692852 | B.1.1.7 | GRY | 38 | TJ28282A,A28295G,G2881A,G28882A,G28883C,C28977T                                                                                                                                                                                                                                                                                   | N:D3L:N:R203K:N:G204R,N:S235F,ORF1aL730F,ORF1aT1001,ORF1aA1708D,ORF1aI2230T,ORF1aI3116F,ORF1bP314L,ORF7aP84S,ORF8:Q27*,ORF8:R52I,ORF8:Y73C,S:N501Y,S:A570D,S:D614G,S:P681H,S:T716I,S:S982A,S:D1118H       | 27 | 0    |
| hCoV-19/Mexico/VER-INMEGEN-06-04-13/2021    | EPI_ISL_2894163 | B.1.1.7 | GRY | 33 | C241T,C913T,C3037T,C3267T,C5388A,C5986T,T6954C,A8848G,C14408T,C14676T,C15279T,T16176C,A23063T,C23114T,C23271A,A23403G,C23604A,C23709T,T24506G,G24914C,G25244C,C27972T,G28048T,A28111G,G28280C,A28281T,T28282A,G2881A,G28882A,G28883C,C28977T                                                                                      | N:D3L:N:R203K:N:G204R,N:S235F,ORF1aL730F,ORF1aT1001,ORF1aA1708D,ORF1aI2230T,ORF1aI3116F,ORF1bP314L,ORF7aP84S,ORF8:Q27*,ORF8:R52I,ORF8:Y73C,S:N501Y,S:A570D,S:D614G,S:P681H,S:T716I,S:S982A,S:D1118H       | 19 | 126  |
| hCoV-19/Mexico/VER-INMEGEN-06-04-287/2021   | EPI_ISL_2894334 | B.1.1.7 | GRY | 40 | TJ28282A,A28295G,G2881A,G28882A,G28883C,C28977T                                                                                                                                                                                                                                                                                   | N:D3L:N:R203K:N:G204R,N:S235F,ORF1aL730F,ORF1aT1001,ORF1aA1708D,ORF1aI2230T,ORF1aI3116F,ORF1bP314L,ORF7aP84S,ORF8:Q27*,ORF8:R52I,ORF8:Y73C,S:N501Y,S:A570D,S:D614G,S:P681H,S:T716I,S:S982A,S:D1118H       | 26 | 190  |
| hCoV-19/Mexico/VER-INMEGEN-06-04-324/2021   | EPI_ISL_2894370 | B.1.1.7 | GRY | 39 | OC,A28281T,T28282A,A28804G,G2881A,G28882A,G28883C,C28977T                                                                                                                                                                                                                                                                         | N:D3L:N:R203K:N:G204R,N:S235F,ORF1aL730F,ORF1aT1001,ORF1aA1708D,ORF1aI2230T,ORF1aI3116F,ORF1bP314L,ORF7aP84S,ORF8:Q27*,ORF8:R52I,ORF8:Y73C,S:N501Y,S:A570D,S:D614G,S:P681H,S:T716I,S:S982A,S:D1118H       | 25 | 0    |
| hCoV-19/Mexico/VER-INMEGEN-06-04-6/2021     | EPI_ISL_2894156 | B.1.1.7 | GR  | 37 | 82A,A28295G,G2881A,G28882A,G28883C,C28977T                                                                                                                                                                                                                                                                                        | M:D3Y:N:D3L:N:R203K:N:G204R,N:S235F,ORF1aL730F,ORF1aT1001,ORF1aA1708D,ORF1aI2230T,ORF1aI3116F,ORF1bP314L,ORF7aP84S,ORF8:Q27*,ORF8:R52I,ORF8:Y73C,S:N501Y,S:A570D,S:D614G,S:P681H,S:T716I,S:S982A,S:D1118H | 25 | 411  |

|                                             |                 |         |     |    |                                                                                                                                                                                                                                                                                                                           |                                                                                                                                                                                                                                                                                      |      |
|---------------------------------------------|-----------------|---------|-----|----|---------------------------------------------------------------------------------------------------------------------------------------------------------------------------------------------------------------------------------------------------------------------------------------------------------------------------|--------------------------------------------------------------------------------------------------------------------------------------------------------------------------------------------------------------------------------------------------------------------------------------|------|
| hCoV-19/Mexico/VER-INMEGEN-16-284/2021      | EPI_ISL_2978595 | B.1.1.7 | GRY | 41 | C241T,C913T,C2110T,C2223T,G3004T,C3037T,C3267T,C5388A,C5672T,C5986T,T6954C,G7042T,C10525T,C10789T,C14120T,C14408T,C14676T,C15279T,T16176C,A23063T,C23271A,A23403G,G23593T,C23604A,C23709T,T24506G,G24914C,C26110T,C26735T,C27972T,G28048T,A28095T,A28111G,G28280C,A28281T,T28282A,G28804A,G28881A,G28882A,G28883C,C28977T | N:D3L,N:R203K,N:G204R,N:S235F,ORF1a:S653L,ORF1a:E913D,ORF1a:T1001I,ORF1a:A1708D,ORF1a:P180S,ORF1a:I2230T,ORF1a:M2259,ORF1b:P218L,ORF1b:P314L,ORF3a:P240S,ORF8:Q27*,ORF8:Y73C,S:N501Y,S:A570D,S:D614G,S:P681H,S:T716I,S:S982A,S:D1118H,S:K1191N                                       | 87   |
| hCoV-19/Mexico/VER-INMEGEN-16-302/2021      | EPI_ISL_2978612 | B.1.1.7 | GR  | 40 | C203T,C241T,C913T,G1820A,C3037T,C3267T,C5388A,G5924A,C5986T,T6954C,G9526T,C12119T,A12162G,C14408T,C14676T,C15279T,C15720T,T16176C,A17615G,T19363C,A21137G,C23248T,C23271A,A23403G,C23604A,C23709T,T24506G,G24914C,G25135T,T27634C,C27972T,G28048T,A28111G,G28280C,A28281T,T28282A,G28881A,G28882A,G28883C,C28977T         | N:D3L,N:R203K,N:G204R,N:S235F,ORF1a:G519S,ORF1a:T1001I,ORF1a:A1708D,ORF1a:V1887I,ORF1a:I2230T,ORF1a:M3087I,ORF1a:P3952S,ORF1a:Q3966R,ORF1b:P314L,ORF1b:K1383R,ORF1b:K2557R,ORF8:Q27*,ORF8:R52I,ORF8:K68*,ORF8:Y73C,S:N501Y,S:A570D,S:D614G,S:P681H,S:T716I,S:S982A,S:D1118H,S:K1191N | 2628 |
| hCoV-19/Mexico/VER-INMEGEN-16-310/2021      | EPI_ISL_2978619 | B.1.1.7 | GRY | 41 | C203T,C241T,C913T,G1820A,C3037T,C3267T,C5388A,G5924A,C5986T,T6954C,G9526T,C10030T,C12119T,A12162G,C14408T,C14676T,C15279T,C15720T,T16176C,A17615G,T19363C,A21137G,A23063T,C23248T,C23271A,A23403G,C23604A,C23709T,T24506G,G24914C,G25135T,C27972T,G28048T,A28111G,G28280C,A28281T,T28282A,G28881A,G28882A,G28883C,C28977T | N:D3L,N:R203K,N:G204R,N:S235F,ORF1a:G519S,ORF1a:T1001I,ORF1a:A1708D,ORF1a:V1887I,ORF1a:I2230T,ORF1a:M3087I,ORF1a:P3952S,ORF1a:Q3966R,ORF1b:P314L,ORF1b:K1383R,ORF1b:K2557R,ORF8:Q27*,ORF8:R52I,ORF1b:Y191N                                                                           | 382  |
| hCoV-19/Mexico/VER-INMEGEN-16-322/2021      | EPI_ISL_2978629 | B.1.1.7 | GR  | 34 | C241T,C913T,C3037T,C3267T,G4145A,C5388A,C5986T,T6954C,A7479G,C14408T,C14676T,T15096C,C15279T,T16176C,C17676T,C23271A,A23403G,C23604A,C23709T,A24070T,T24506G,G24914C,C25624T,C27972T,G28048T,A28111G,G28280C,A28281T,T28282A,G28881A,G28882A,G28883C,C28977T                                                              | N:D3L,N:R203K,N:G204R,N:S235F,ORF1a:T1001I,ORF1a:G1294S,ORF1a:A1708D,ORF1a:I2230T,ORF1a:N2405S,ORF1b:P314L,ORF3a:I155V,ORF3a:H78Y,ORF8:Q27*,ORF8:R52I,ORF8:K68*,ORF8:Y73C,S:N501Y,S:A570D,S:D614G,S:P681H,S:T716I,S:Q836H,S:S982A,S:D1118H                                           | 1933 |
| hCoV-19/Mexico/VER-INMEGEN-16-338/2021      | EPI_ISL_2978643 | B.1.1.7 | GRY | 36 | C241T,C913T,C3037T,C3267T,G4145A,C5388A,C5986T,T6954C,A7479G,C14408T,C14676T,T15096C,C15279T,T16176C,C17676T,A23063T,C23271A,A23403G,C23604A,C23709T,A24070T,T24506G,G24914C,C25624T,C27972T,G28048T,A28095T,A28111G,G28280C,A28281T,T28282A,G28881A,G28882A,G28883C,C28977T                                              | N:D3L,N:R203K,N:G204R,N:S235F,ORF1a:T1001I,ORF1a:A1708D,ORF1a:I2230T,ORF1a:M2259,ORF1b:P218L,ORF1b:P314L,ORF8:Q27*,ORF8:R52I,ORF8:K68*,ORF8:Y73C,S:N501Y,S:A570D,S:D614G,S:P681H,S:T716I,S:Q836H,S:S982A,S:D1118H                                                                    | 170  |
| hCoV-19/Mexico/YUC-Biomedicos-6140701/2021  | EPI_ISL_2918940 | B.1.1.7 | GRY | 39 | C241T,C913T,C2453T,C3037T,C3267T,C5388A,C5986T,T6954C,C9611T,C9893T,C13860T,C14408T,C14676T,C15279T,T16176C,T18429C,C21855T,G21974C,A23063T,C23271A,A23403G,C23604A,C23709T,T24506G,G24914C,C26822T,C27972T,G28048T,A28111G,G28280C,S28281H,G28280C,A28281T,T28282A,G28881A,G28882A,G28883C,C28977T,C2920T                | N:D3L,N:R203K,N:G204R,N:S235F,ORF1a:730F,ORF1a:T1001I,ORF1a:A1708D,ORF1a:I2230T,ORF1a:K1316F,ORF1b:P314L,ORF8:Q27*,ORF8:R52I,ORF8:Y73C,S:N501Y,S:A570D,S:D614G,S:P681H,S:T716I,S:S982A,S:D1118H                                                                                      | 0    |
| hCoV-19/Mexico/YUC-Biomedicos-6150004/2021  | EPI_ISL_2928339 | B.1.1.7 | GRY | 42 | C241T,C913T,C2453T,C3037T,C3267T,C5388A,C5986T,T6954C,G7042T,C8964T,A10195G,C10279T,C14120T,C14408T,C14676T,C15279T,T16176C,C16887T,G17427T,A23063T,C23271A,A23403G,C23604A,C23709T,T24506G,G24914C,A27943G,C27972T,G28048T,G28075T,A28095T,A28111G,G28280C,A28281T,T28282A,G28881A,G28882A,G28883C,C28977T,G29477T       | N:D3L,N:R203K,N:G204R,N:S235F,ORF1a:730F,ORF1a:T1001I,ORF1a:A1708D,ORF1a:I2230T,ORF1a:K1316F,ORF1b:P314L,ORF8:Q27*,ORF8:R52I,ORF8:Y73C,S:N501Y,S:A570D,S:D614G,S:P681H,S:T716I,S:S982A,S:D1118H                                                                                      | 0    |
| hCoV-19/Mexico/YUC-Biomedicos-6220333/2021  | EPI_ISL_2928304 | B.1.1.7 | GRY | 27 | C241T,C913T,C3037T,C3267T,C5388A,C5986T,T6954C,C9693T,C10138T,C11572T,C14408T,C14676T,C15279T,T16176C,G18651A,T23042C,A23063T,C23271A,A23403G,C23604A,C23709T,T24506G,G24914C,C25006T,G25218T,C25553T,G26107T,C27615T,C27972T,G28048T,A28111G,G28280C,A28281T,T28282A,G28881A,G28882A,G28883C,C28977T,C29397T             | N:D3L,N:R203K,N:G204R,N:S235F,ORF1a:730F,ORF1a:T1001I,ORF1a:A1708D,ORF1a:I2230T,ORF1a:K1316F,ORF1b:P314L,ORF8:Q27*,ORF8:R52I,ORF8:Y73C,S:N501Y,S:A570D,S:D614G,S:P681H,S:T716I,S:S982A,S:D1118H                                                                                      | 0    |
| hCoV-19/Mexico/YUC-InDRE_F11421_S904/2021   | EPI_ISL_1423514 | B.1.1.7 | GRY | 39 | C241T,C913T,C2453T,C3037T,C3267T,C5388A,C5986T,T6954C,C9611T,C14408T,C14676T,C15279T,C15925T,T16176C,C19185T,C21855T,G21974C,A23063T,C23271A,A23403G,C23604A,C23709T,T24506G,G24914C,C27972T,G28048T,A28111G,G28280C,A28281T,T28282A,A28295G,C28820C,A28281T,T28282A,G28881A,G28882A,G28883C,C28977T,G29527T              | N:D3L,N:R203K,N:G204R,N:S235F,ORF1a:730F,ORF1a:T1001I,ORF1a:A1708D,ORF1a:I2230T,ORF1a:K1316F,ORF1b:P314L,ORF8:Q27*,ORF8:R52I,ORF8:Y73C,S:N501Y,S:A570D,S:D614G,S:P681H,S:T716I,S:S982A,S:D1118H                                                                                      | 139  |
| hCoV-19/Mexico/YUC-InDRE_F12194_S1195/2021  | EPI_ISL_1626802 | B.1.1.7 | GRY | 37 | C241T,C913T,C1223T,C2453T,C3037T,C3267T,C5388A,C5986T,T6954C,C9611T,C14408T,C14676T,C15279T,T16176C,C21855T,G21974C,A23063T,C23271A,A23403G,C23604A,C23709T,T24506G,G24914C,C27972T,G28048T,A28111G,G28280C,A28281T,T28282A,A28295G,G28460T,G2881A,G28882A,G28883C,C28977T                                                | N:D3L,N:R203K,N:G204R,N:S235F,ORF1a:730F,ORF1a:T1001I,ORF1a:A1708D,ORF1a:I2230T,ORF1a:K1316F,ORF1b:P314L,ORF8:Q27*,ORF8:R52I,ORF8:Y73C,S:N501Y,S:A570D,S:D614G,S:P681H,S:T716I,S:S982A,S:D1118H                                                                                      | 42   |
| hCoV-19/Mexico/YUC-InDRE_FB15125_S2056/2021 | EPI_ISL_2283698 | B.1.1.7 | GRY | 35 | C241T,C913T,C3037T,C3267T,C5388A,C5986T,T6954C,C14408T,C14676T,C15279T,T16176C,A23063T,C23271A,A23403G,C23604A,C23709T,T24506G,G24914C,G25690T,C27972T,G28048T,A28111G,G28280C,A28281T,T28282A,G28881A,G28882A,G28883C,C28977T                                                                                            | N:D3L,N:R203K,N:G204R,N:S235F,ORF1a:T1001I,ORF1a:A1708D,ORF1a:I2230T,ORF1b:P314L,ORF8:Q27*,ORF8:R52I,ORF8:Y73C,ORF9b:G38V,S:N501Y,S:A570D,S:D614G,S:P681H,S:T716I,S:S982A,S:D1118H                                                                                                   | 67   |
| hCoV-19/Mexico/YUC-InDRE_FB15167_S2057/2021 | EPI_ISL_2283699 | B.1.1.7 | GRY | 30 | C241T,C913T,C2110T,G3004T,C3037T,C3267T,C5388A,C5986T,T6954C,G7042T,C10789T,C14120T,C14408T,C14676T,G14857T,C15279T,T16176C,G22567T,A23063T,C23271A,A23403G,C23604A,C23709T,T24506G,G24914C,A25336C,C26110T,C26735T,C27972T,G28048T,A28111G,G28280C,A28281T,T28282A,A28804G,G28881A,G28882A,G28883C,C28977T               | N:D3L,N:R203K,N:G204R,N:S235F,ORF1a:I2230T,ORF1a:P218L,ORF1b:P314L,ORF1b:V464F,ORF3a:P240S,ORF8:Q27*,ORF8:R52I,ORF8:Y73C,S:N501Y,S:A570D,S:D614G,S:P681H,S:T716I,S:S982A,S:D1118H                                                                                                    | 0    |
| hCoV-19/Mexico/YUC-InDRE_FB15328_S2079/2021 | EPI_ISL_2283719 | B.1.1.7 | GRY | 39 | C241T,C913T,C2453T,C3037T,C3267T,C5388A,C5986T,T6954C,C8334T,C9611T,C14408T,C14676T,C15279T,T16176C,G18984T,C21855T,C21952T,G21974C,A23063T,C23271A,T23323A,A23403G,C23604A,C23709T,T24506G,G24914C,C27972T,G28048T,A28111G,G28280C,A28281T,T28282A,A28295G,G28881A,G28882A,G28883C,C28977T                               | N:D3L,N:R203K,N:G204R,N:S235F,ORF1a:I2230T,ORF1a:P218L,ORF1b:P314L,ORF1b:V464F,ORF3a:P240S,ORF8:Q27*,ORF8:R52I,ORF8:Y73C,S:N501Y,S:A570D,S:D614G,S:P681H,S:T716I,S:S982A,S:D1118H                                                                                                    | 0    |
| hCoV-19/Mexico/YUC-InDRE_FB16549_S3111/2021 | EPI_ISL_2663378 | B.1.1.7 | GRY | 40 | T728282A,A28295G,G28881A,G28882A,G28883C,C28977T,C29253T,G29405C                                                                                                                                                                                                                                                          | N:D3L,N:R203K,N:G204R,N:S235F,ORF1a:T1001I,ORF1a:A1708D,ORF1a:I2230T,ORF1b:P314L,ORF8:Q27*,ORF8:R52I,ORF8:Y73C,S:N501Y,S:A570D,S:D614G,S:P681H,S:T716I,S:S982A,S:D1118H                                                                                                              | 0    |
| hCoV-19/Mexico/YUC-InDRE_FB16551_S3112/2021 | EPI_ISL_2663379 | B.1.1.7 | GRY | 33 | C241T,C913T,C3037T,C3267T,C5388A,C5986T,T6954C,C14408T,C14676T,C15279T,T16176C,A17615G,C21621T,A23063T,C23271A,A23403G,C23604A,C23709T,T24506G,G24914C,C27615T,G28048T,A28111G,G28280C,A28281T,T28282A,G28881A,G28882A,G28883C,C28977T                                                                                    | N:D3L,N:R203K,N:G204R,N:S235F,ORF1a:T1001I,ORF1a:A1708D,ORF1a:I2230T,ORF1b:P314L,ORF1b:K1383R,ORF8:Q27*,ORF8:R52I,ORF8:Y73C,S:N501Y,S:A570D,S:D614G,S:P681H,S:T716I,S:S982A,S:D1118H                                                                                                 | 0    |
| hCoV-19/Mexico/YUC-InDRE_FB16573_S2744/2021 | EPI_ISL_2533770 | B.1.1.7 | GRY | 21 | 972T,G28048T,A28111G,G28280C,A28281T,T28282A,G28881A,G28882A,G28883C,C28977T                                                                                                                                                                                                                                              | N:D3L,N:R203K,N:G204R,N:S235F,ORF1a:T1001I,ORF1a:A1708D,ORF1a:I2230T,ORF1b:P314L,ORF1b:K1383R,ORF8:Q27*,ORF8:R52I,ORF8:Y73C,S:N501Y,S:A570D,S:D614G,S:P681H,S:T716I,S:S982A,S:D1118H                                                                                                 | 0    |
| hCoV-19/Mexico/YUC-InDRE_FB16575_S2745/2021 | EPI_ISL_2533771 | B.1.1.7 | GRY | 41 | 8048T,A28111G,G28280C,A28281T,T28282A,G28881A,G28882A,G28883C,C28977T,C29095T                                                                                                                                                                                                                                             | N:D3L,N:R203K,N:G204R,N:S235F,ORF1a:730F,ORF1a:T1001I,ORF1a:A1708D,ORF1a:I2230T,ORF1a:K1316F,ORF1b:P314L,ORF8:Q27*,ORF8:R52I,ORF8:Y73C,S:N501Y,S:A570D,S:D614G,S:P681H,S:T716I,S:S982A,S:D1118H                                                                                      | 0    |
| hCoV-19/Mexico/YUC-InDRE_FB16578_S2746/2021 | EPI_ISL_2533772 | B.1.1.7 | GRY | 26 | 2A,A28295G,G28881A,G28882A,G28883C,C28977T,C29733T                                                                                                                                                                                                                                                                        | N:D3L,N:R203K,N:G204R,N:S235F,ORF1a:730F,ORF1a:T1001I,ORF1a:A1708D,ORF1a:I2230T,ORF1a:K1316F,ORF1b:P314L,ORF8:Q27*,ORF8:R52I,ORF8:Y73C,S:N501Y,S:A570D,S:D614G,S:P681H,S:T716I,S:S982A,S:D1118H                                                                                      | 0    |
| hCoV-19/Mexico/YUC-InDRE_FB16582_S2747/2021 | EPI_ISL_2533773 | B.1.1.7 | GRY | 36 | 95G,G28881A,G28882A,G28883C,C28977T                                                                                                                                                                                                                                                                                       | N:D3L,N:R203K,N:G204R,N:S235F,ORF1a:730F,ORF1a:T1001I,ORF1a:A1708D,ORF1a:I2230T,ORF1a:K1316F,ORF1b:P314L,ORF8:Q27*,ORF8:R52I,ORF8:Y73C,S:N501Y,S:A570D,S:D614G,S:P681H,S:T716I,S:S982A,S:D1118H                                                                                      | 0    |
| hCoV-19/Mexico/YUC-InDRE_FB16584_S2748/2021 | EPI_ISL_2533774 | B.1.1.7 | GRY | 40 | T728282A,A28877T,G28878C,G28881A,G28882A,G28883C,C28977T,C29722T                                                                                                                                                                                                                                                          | N:D3L,N:R203K,N:G204R,N:S235F,ORF1a:730F,ORF1a:T1001I,ORF1a:A1708D,ORF1a:I2230T,ORF1a:K1316F,ORF1b:P314L,ORF8:Q27*,ORF8:R52I,ORF8:Y73C,S:N501Y,S:A570D,S:D614G,S:P681H,S:T716I,S:S982A,S:D1118H                                                                                      | 0    |

|                                             |                 |         |     |    |                                                                                                                                                                                                                                                                                                                                                                                                                                                                                                                                                                                                                                                                                         |                                                                                                                                                                                                                                                                     |   |   |
|---------------------------------------------|-----------------|---------|-----|----|-----------------------------------------------------------------------------------------------------------------------------------------------------------------------------------------------------------------------------------------------------------------------------------------------------------------------------------------------------------------------------------------------------------------------------------------------------------------------------------------------------------------------------------------------------------------------------------------------------------------------------------------------------------------------------------------|---------------------------------------------------------------------------------------------------------------------------------------------------------------------------------------------------------------------------------------------------------------------|---|---|
| hCoV-19/Mexico/YUC-InDRE_FB16588_S2749/2021 | EPI_ISL_2533775 | B.1.1.7 | GRY | 37 | C241T,C913T,C2453T,C3037T,C3267T,C5388A,C5986T,T6954C,C9611T,C9893T,C14408T,C14676T,C15279T,T16176C,T18429C,C21855T,G21974C,A23063T,C23271A,A23403G,C23604A,C23709T,C23929T,T24506G,G24914C,C27972T,G28048T,A28111G,G28280C,A28281T,T28282A,A2828295G,G28881A,G28882A,G28883C,C28977T,G29474T                                                                                                                                                                                                                                                                                                                                                                                           | N:D3L:N:N80,N:R203K,N:G204R,N:S235F,ORF1a:1730F,ORF1a:T1001,ORF1a:1708D,ORF1a:2230T,ORF1a:L3116F,ORF1a:L3210F,ORF1b:P314L,ORF8:Q27*,ORF8:R52I,ORF8:Y73C,S:598F,S:D138H,S:N501Y,S:A570D,S:D614G,S:P681H,S:T716I,S:S982A,S:D1118H                                     | 6 | 0 |
| hCoV-19/Mexico/YUC-InDRE_FB16589_S2750/2021 | EPI_ISL_2533776 | B.1.1.7 | GRY | 41 | C241T,C913T,C2110T,G3004T,C3037T,C3267T,C5388A,G5704T,C5986T,T6954C,G7042T,C10789T,C14120T,C14408T,C14676T,G14857T,C15279T,T16176C,G21538T,G22567T,A23063T,C23271A,A23403G,C23604A,C23709T,T24506G,G24914C,C26110T,C26735T,C27972T,G28048T,A28099T,A28111G,G28280C,A28281T,T28282A,A28804G,G28881A,G28882A,G28883C,C28977T                                                                                                                                                                                                                                                                                                                                                              | N:D3L:N:N80,N:R203K,N:G204R,N:S235F,ORF1a:1730F,ORF1a:T1001,ORF1a:1708D,ORF1a:2230T,ORF1a:L3116F,ORF1a:L3210F,ORF1b:P314L,ORF8:Q27*,ORF8:R52I,ORF8:Y73C,S:598F,S:D138H,S:N501Y,S:A570D,S:D614G,S:P681H,S:T716I,S:S982A,S:D1118H                                     | 6 | 0 |
| hCoV-19/Mexico/YUC-InDRE_FB16598_S2751/2021 | EPI_ISL_2533777 | B.1.1.7 | GRY | 41 | C241T,C913T,C2110T,G3004T,C3037T,C3267T,C5388A,G5704T,C5986T,T6954C,G7042T,C10789T,C14120T,C14408T,C14676T,G14857T,C15279T,T16176C,G21538T,G22567T,A23063T,C23271A,A23403G,C23604A,C23709T,T24506G,G24914C,C26110T,C26735T,C27972T,G28048T,A28099T,A28111G,G28280C,A28281T,T28282A,A28804G,G28881A,G28882A,G28883C,C28977T                                                                                                                                                                                                                                                                                                                                                              | N:D3L:N:N80,N:R203K,N:G204R,N:S235F,ORF1a:1730F,ORF1a:T1001,ORF1a:1708D,ORF1a:2230T,ORF1a:L3116F,ORF1a:L3210F,ORF1b:P314L,ORF8:Q27*,ORF8:R52I,ORF8:Y73C,S:598F,S:D138H,S:N501Y,S:A570D,S:D614G,S:P681H,S:T716I,S:S982A,S:D1118H                                     | 6 | 0 |
| hCoV-19/Mexico/YUC-InDRE_FB16601_S2752/2021 | EPI_ISL_2533778 | B.1.1.7 | GRY | 42 | G28280C,A28281T,T28282A,A28877T,G28878C,G28881A,G28882A,G28883C,C28977T,C29722T,C241T,C913T,C2453T,C3037T,C3267T,C5388A,C5986T,T6954C,C7299T,C7945T,C12099T,C14184T,C14408T,C14676T,T15096C,C15279T,T16176C,C19269T,A23063T,C23271A,A23403G,C23604A,C23709T,G24104C,T24506G,G24914C,C27972T,G28048T,A28095T,A28111G,G28280C,A28281T,T28282A,A28877T,G28878C,G28881A,G28882A,G28883C,C28977T,C29722T,C241T,C2547T,C913T,C2453T,C3037T,C3267T,C5388A,C5986T,T6954C,C9611T,C14408T,C14676T,C15279T,T16176C,T18099C,C21855T,G21974C,A23063T,C23271A,A23403G,C23604A,C23709T,T24506G,G24914C,C25609T,C27972T,G28048T,A28111G,G28280C,A28281T,T28282A,A28295G,G28881A,G28882A,G28883C,C28977T | N:D3L:N:N80,N:R203K,N:G204R,N:S235F,ORF1a:1730F,ORF1a:T1001,ORF1a:1708D,ORF1a:2230T,ORF1a:L3116F,ORF1a:L3210F,ORF1b:P314L,ORF8:Q27*,ORF8:R52I,ORF8:Y73C,S:598F,S:D138H,S:N501Y,S:A570D,S:D614G,S:P681H,S:T716I,S:S982A,S:D1118H                                     | 6 | 0 |
| hCoV-19/Mexico/YUC-InDRE_FB16607_S2753/2021 | EPI_ISL_2533779 | B.1.1.7 | GRY | 36 | G28881A,G28882A,G28883C,C28977T                                                                                                                                                                                                                                                                                                                                                                                                                                                                                                                                                                                                                                                         | N:D3L:N:N80,N:R203K,N:G204R,N:S235F,ORF1a:1730F,ORF1a:P943L,ORF1a:T1001,ORF1a:1708D,ORF1a:2230T,ORF1a:M2796F,ORF1a:L3116F,ORF1b:P314L,ORF1b:Y903F,ORF3a:P240S,ORF8:Q27*,ORF8:R52I,ORF8:Y73C,S:598F,S:D138H,S:N501Y,S:A570D,S:D614G,S:P681H,S:T716I,S:S982A,S:D1118H | 6 | 0 |
| hCoV-19/Mexico/YUC-InDRE_FB16611_S2754/2021 | EPI_ISL_2533780 | B.1.1.7 | GRY | 41 | A28111G,G28280C,A28281T,T28282A,A28295G,G28881A,G28882A,G28883C,C28977T                                                                                                                                                                                                                                                                                                                                                                                                                                                                                                                                                                                                                 | N:D3L:N:N80,N:R203K,N:G204R,N:S235F,ORF1a:1730F,ORF1a:T1001,ORF1a:1708D,ORF1a:2230T,ORF1a:L3116F,ORF1a:L3210F,ORF1b:P314L,ORF8:Q27*,ORF8:R52I,ORF8:Y73C,S:598F,S:D138H,S:N501Y,S:A570D,S:D614G,S:P681H,S:T716I,S:S982A,S:D1118H                                     | 6 | 0 |
| hCoV-19/Mexico/YUC-InDRE_FB16614_S2755/2021 | EPI_ISL_2533781 | B.1.1.7 | GRY | 42 | 77T                                                                                                                                                                                                                                                                                                                                                                                                                                                                                                                                                                                                                                                                                     | N:D3L:N:N80,N:R203K,N:G204R,N:S235F,ORF1a:1730F,ORF1a:T1001,ORF1a:1708D,ORF1a:2230T,ORF1a:L3116F,ORF1b:P314L,ORF8:Q27*,ORF8:R52I,ORF8:Y73C,S:598F,S:D138H,S:N501Y,S:A570D,S:D614G,S:P681H,S:T716I,S:S982A,S:D1118H                                                  | 6 | 0 |
| hCoV-19/Mexico/YUC-InDRE_FB16617_S2756/2021 | EPI_ISL_2533782 | B.1.1.7 | GRY | 35 | 881A,G28882A,G28883C,C28977T                                                                                                                                                                                                                                                                                                                                                                                                                                                                                                                                                                                                                                                            | N:D3L:N:N80,N:R203K,N:G204R,N:S235F,ORF1a:1730F,ORF1a:T1001,ORF1a:1708D,ORF1a:2230T,ORF1a:L3116F,ORF1a:L3210F,ORF1b:P314L,ORF8:Q27*,ORF8:R52I,ORF8:Y73C,S:598F,S:D138H,S:N501Y,S:A570D,S:D614G,S:P681H,S:T716I,S:S982A,S:D1118H                                     | 6 | 0 |
| hCoV-19/Mexico/YUC-InDRE_FB16638_S2757/2021 | EPI_ISL_2533783 | B.1.1.7 | GRY | 34 | 882A,G28883C,C28977T                                                                                                                                                                                                                                                                                                                                                                                                                                                                                                                                                                                                                                                                    | N:D3L:N:N80,N:R203K,N:G204R,N:S235F,ORF1a:1730F,ORF1a:T1001,ORF1a:1708D,ORF1a:2230T,ORF1a:L3116F,ORF1b:P314L,ORF8:Q27*,ORF8:R52I,ORF8:Y73C,S:598F,S:D138H,S:N501Y,S:A570D,S:D614G,S:P681H,S:T716I,S:S982A,S:D1118H                                                  | 6 | 0 |
| hCoV-19/Mexico/YUC-InDRE_FB16653_S2758/2021 | EPI_ISL_2533784 | B.1.1.7 | GRY | 35 | 882A,G28883C,C28977T,C29754T                                                                                                                                                                                                                                                                                                                                                                                                                                                                                                                                                                                                                                                            | N:D3L:N:N80,N:R203K,N:G204R,N:S235F,ORF1a:1730F,ORF1a:T1001,ORF1a:1708D,ORF1a:2230T,ORF1a:L3116F,ORF1b:P314L,ORF8:Q27*,ORF8:R52I,ORF8:Y73C,S:598F,S:D138H,S:N501Y,S:A570D,S:D614G,S:P681H,S:T716I,S:S982A,S:D1118H                                                  | 6 | 0 |
| hCoV-19/Mexico/YUC-InDRE_FB16657_S2759/2021 | EPI_ISL_2533785 | B.1.1.7 | GRY | 36 | 295G,G28881A,G28882A,G28883C,C28977T                                                                                                                                                                                                                                                                                                                                                                                                                                                                                                                                                                                                                                                    | N:D3L:N:N80,N:R203K,N:G204R,N:S235F,ORF1a:1730F,ORF1a:T1001,ORF1a:1708D,ORF1a:2230T,ORF1a:L3116F,ORF1a:L3210F,ORF1b:P314L,ORF8:Q27*,ORF8:R52I,ORF8:Y73C,S:598F,S:D138H,S:N501Y,S:A570D,S:D614G,S:P681H,S:T716I,S:S982A,S:D1118H                                     | 6 | 0 |
| hCoV-19/Mexico/YUC-InDRE_FB16659_S2760/2021 | EPI_ISL_2533786 | B.1.1.7 | GRY | 38 | 8280C,A28281T,T28282A,G28881A,G28882A,G28883C,C28977T                                                                                                                                                                                                                                                                                                                                                                                                                                                                                                                                                                                                                                   | N:D3L:N:N80,N:R203K,N:G204R,N:S235F,ORF1a:1730F,ORF1a:T1001,ORF1a:1708D,ORF1a:2230T,ORF1a:L3116F,ORF1a:L3210F,ORF1b:P314L,ORF8:Q27*,ORF8:R52I,ORF8:Y73C,S:598F,S:D138H,S:N501Y,S:A570D,S:D614G,S:P681H,S:T716I,S:S982A,S:D1118H                                     | 6 | 0 |
| hCoV-19/Mexico/YUC-InDRE_FB16661_S2761/2021 | EPI_ISL_2533787 | B.1.1.7 | GRY | 46 | 4G,G28881A,G28882A,G28883C,C28977T                                                                                                                                                                                                                                                                                                                                                                                                                                                                                                                                                                                                                                                      | N:D3L:N:N80,N:R203K,N:G204R,N:S235F,ORF1a:1730F,ORF1a:T1001,ORF1a:1708D,ORF1a:2230T,ORF1a:L3116F,ORF1a:L3210F,ORF1b:P314L,ORF8:Q27*,ORF8:R52I,ORF8:Y73C,S:598F,S:D138H,S:N501Y,S:A570D,S:D614G,S:P681H,S:T716I,S:S982A,S:D1118H                                     | 6 | 0 |
| hCoV-19/Mexico/YUC-InDRE_FB16665_S2762/2021 | EPI_ISL_2533788 | B.1.1.7 | GRY | 38 | 28281T,T28282A,G28881A,G28882A,G28883C,C28977T                                                                                                                                                                                                                                                                                                                                                                                                                                                                                                                                                                                                                                          | N:D3L:N:N80,N:R203K,N:G204R,N:S235F,ORF1a:1730F,ORF1a:T1001,ORF1a:1708D,ORF1a:2230T,ORF1a:L3116F,ORF1a:L3210F,ORF1b:P314L,ORF8:Q27*,ORF8:R52I,ORF8:Y73C,S:598F,S:D138H,S:N501Y,S:A570D,S:D614G,S:P681H,S:T716I,S:S982A,S:D1118H                                     | 6 | 0 |
| hCoV-19/Mexico/YUC-InDRE_FB16666_S2763/2021 | EPI_ISL_2533789 | B.1.1.7 | GRY | 46 | 4G,G28881A,G28882A,G28883C,C28977T                                                                                                                                                                                                                                                                                                                                                                                                                                                                                                                                                                                                                                                      | N:D3L:N:N80,N:R203K,N:G204R,N:S235F,ORF1a:1730F,ORF1a:T1001,ORF1a:1708D,ORF1a:2230T,ORF1a:L3116F,ORF1a:L3210F,ORF1b:P314L,ORF8:Q27*,ORF8:R52I,ORF8:Y73C,S:598F,S:D138H,S:N501Y,S:A570D,S:D614G,S:P681H,S:T716I,S:S982A,S:D1118H                                     | 6 | 0 |
| hCoV-19/Mexico/YUC-InDRE_FB16667_S2764/2021 | EPI_ISL_2533790 | B.1.1.7 | GRY | 40 | T28282A,A28877T,G28878C,G28881A,G28882A,G28883C,C28977T,C29722T                                                                                                                                                                                                                                                                                                                                                                                                                                                                                                                                                                                                                         | N:D3L:N:N80,N:R203K,N:G204R,N:S235F,ORF1a:1730F,ORF1a:T1001,ORF1a:1708D,ORF1a:2230T,ORF1a:L3116F,ORF1a:L3210F,ORF1b:P314L,ORF8:Q27*,ORF8:R52I,ORF8:Y73C,S:598F,S:D138H,S:N501Y,S:A570D,S:D614G,S:P681H,S:T716I,S:S982A,S:D1118H                                     | 6 | 0 |
| hCoV-19/Mexico/YUC-InDRE_FB16672_S2765/2021 | EPI_ISL_2533791 | B.1.1.7 | GRY | 38 | 95G,G28881A,G28882A,G28883C,C28977T,G29033T,C29642T                                                                                                                                                                                                                                                                                                                                                                                                                                                                                                                                                                                                                                     | N:D3L:N:N80,N:R203K,N:G204R,N:S235F,ORF1a:1730F,ORF1a:T1001,ORF1a:1708D,ORF1a:2230T,ORF1a:L3116F,ORF1a:L3210F,ORF1b:P314L,ORF8:Q27*,ORF8:R52I,ORF8:Y73C,S:598F,S:D138H,S:N501Y,S:A570D,S:D614G,S:P681H,S:T716I,S:S982A,S:D1118H                                     | 6 | 0 |
| hCoV-19/Mexico/YUC-InDRE_FB16674_S2766/2021 | EPI_ISL_2533792 | B.1.1.7 | GRY | 35 | 81A,G28882A,G28883C,C28977T                                                                                                                                                                                                                                                                                                                                                                                                                                                                                                                                                                                                                                                             | N:D3L:N:N80,N:R203K,N:G204R,N:S235F,ORF1a:1730F,ORF1a:T1001,ORF1a:1708D,ORF1a:2230T,ORF1a:L3116F,ORF1a:L3210F,ORF1b:P314L,ORF8:Q27*,ORF8:R52I,ORF8:Y73C,S:598F,S:D138H,S:N501Y,S:A570D,S:D614G,S:P681H,S:T716I,S:S982A,S:D1118H                                     | 6 | 0 |



|                                             |                 |         |     |  |  |    |                                                                                                                                                                                                                                                                                                                                                                                                                                                                           |  |  |  |  |                                                                                                                                                                                                                        |                                                                                                                                                                                                                                                                                                                                                                   |  |  |  |
|---------------------------------------------|-----------------|---------|-----|--|--|----|---------------------------------------------------------------------------------------------------------------------------------------------------------------------------------------------------------------------------------------------------------------------------------------------------------------------------------------------------------------------------------------------------------------------------------------------------------------------------|--|--|--|--|------------------------------------------------------------------------------------------------------------------------------------------------------------------------------------------------------------------------|-------------------------------------------------------------------------------------------------------------------------------------------------------------------------------------------------------------------------------------------------------------------------------------------------------------------------------------------------------------------|--|--|--|
|                                             |                 |         |     |  |  | 36 | C241T,C254T,C913T,C2453T,C3037T,C3267T,C5388A,C5986T,T6954C,C9611T,C14408T,C14676T<br>_C15279T,T16176C,T18099C,C21855T,G21974C,A23063T,C23271A,A23403G,C23604A,C23709T<br>_T24506G,G24914C,C25609T,C27972T,G28048T,A28111G,G28280C,A28281T,T28282A,A28295<br>G,G28881A,G28882A,G28883C,C28977T                                                                                                                                                                            |  |  |  |  | N:D3L,N:N8D,N:R203K,N:G204R,N:S235F,ORF1aL730F,ORF1aT1001I,ORF1a:<br>A1708D,ORF1aI2230T,ORF1aL3116F,ORF1bP314L,ORF3aL73F,ORF8_Q27*,<br>ORF8_R52I,ORF8_Y73C,S:S98F,S:D138H,S:N501Y,S:A570D,S:D614G,S:P681H,S:<br>D1118H |                                                                                                                                                                                                                                                                                                                                                                   |  |  |  |
| hCoV-19/Mexico/YUC-IndRE_FB16678_S2767/2021 | EPI_ISL_2533793 | B.1.1.7 | GRY |  |  | 37 | C241T,C823T,C913T,C1758T,C2110T,G3004T,C3037T,C3267T,C5388A,C5986T,T6954C,G7042T,C<br>9559T,C14120T,C14408T,C14676T,C15279T,T16176C,G1865T,A23063T,C23271A,A23403G,C2<br>3604A,C23709T,T24506G,G24914C,C26110T,C27972T,G28048T,A28095T,A28111G,G28280C,A<br>28281T,T28282A,G28881A,G28882A,G28883C,C28977T                                                                                                                                                                |  |  |  |  | 24                                                                                                                                                                                                                     | T716I,S:S982A,S:D1118H<br>N:D3L,N:R203K,N:G204R,N:S235F,ORF1aA98V,ORF1aE913D,ORF1aT1001I,<br>ORF1aA1708D,ORF1aI2230T,ORF1aM2259I,ORF1bP218I,ORF1bP314L,OR<br>F1bE1728D,ORF3aP240S,ORF8_Q27**,ORF8_R52I,ORF8_Y73C,S:S98F,K68*,ORF8_Y73C,S:N5<br>01Y,S:A570D,S:D614G,S:P681H,S:T716I,S:S982A,S:D1118H                                                               |  |  |  |
| hCoV-19/Mexico/YUC-IndRE_FB16682_S2768/2021 | EPI_ISL_2533794 | B.1.1.7 | GRY |  |  | 38 | C241T,C254T,C913T,C2453T,C3037T,C3267T,C5388A,C5986T,T6954C,C9611T,C14408T,C14676T<br>_C15279T,T16176C,T18099C,C21855T,G21974C,A23063T,C23271A,A23403G,C23604A,C23709T<br>_T24506G,G24914C,C25609T,C27972T,G28048T,A28111G,G28280C,A28281T,T28282A,A28295<br>G,G28881A,G28882A,G28883C,C28977T                                                                                                                                                                            |  |  |  |  | 25                                                                                                                                                                                                                     | O1Y,S:A570D,S:D614G,S:P681H,S:T716I,S:S982A,S:D1118H<br>N:D3L,N:N8D,N:R203K,N:G204R,N:S235F,ORF1aL730F,ORF1aT1001I,ORF1a:<br>A1708D,ORF1aI2230T,ORF1aL3116F,ORF1bP314L,ORF3aL73F,ORF8_Q27**,<br>ORF8_R52I,ORF8_Y73C,S:S98F,S:D138H,S:N501Y,S:A570D,S:D614G,S:P681H,S:<br>D1118H                                                                                   |  |  |  |
| hCoV-19/Mexico/YUC-IndRE_FB16683_S2769/2021 | EPI_ISL_2533795 | B.1.1.7 | GRY |  |  | 36 | C241T,C254T,C913T,C2453T,C3037T,C3267T,C5388A,C5986T,T6954C,C9611T,C14408T,C14676T<br>_C15279T,T16176C,T18099C,C21855T,G21974C,A23063T,C23271A,A23403G,C23604A,C23709T<br>_T24506G,G24914C,C25609T,C27972T,G28048T,A28111G,G28280C,A28281T,T28282A,A28295<br>G,G28881A,G28882A,G28883C,C28977T                                                                                                                                                                            |  |  |  |  | 24                                                                                                                                                                                                                     | T716I,S:S982A,S:D1118H<br>N:D3L,N:N8D,N:R203K,N:G204R,N:S235F,ORF1aL730F,ORF1aT1001I,ORF1a:<br>A1708D,ORF1aI2230T,ORF1aL3116F,ORF1bP314L,ORF3aL73F,ORF8_Q27**,<br>ORF8_R52I,ORF8_Y73C,S:S98F,S:D138H,S:N501Y,S:A570D,S:D614G,S:P681H,S:<br>D1118H                                                                                                                 |  |  |  |
| hCoV-19/Mexico/YUC-IndRE_FB16684_S2770/2021 | EPI_ISL_2533796 | B.1.1.7 | GRY |  |  | 36 | C241T,C254T,C913T,C2453T,C3037T,C3267T,C5388A,C5986T,T6954C,C9611T,C14408T,C14676T<br>_C15279T,T16176C,T18099C,C21855T,G21974C,A23063T,C23271A,A23403G,C23604A,C23709T<br>_T24506G,G24914C,C25609T,C27972T,G28048T,A28111G,G28280C,A28281T,T28282A,A28295<br>G,G28881A,G28882A,G28883C,C28977T                                                                                                                                                                            |  |  |  |  | 24                                                                                                                                                                                                                     | T716I,S:S982A,S:D1118H<br>N:D3L,N:N8D,N:R203K,N:G204R,N:S235F,ORF1aL730F,ORF1aT1001I,ORF1a:<br>A1708D,ORF1aI2230T,ORF1aL3116F,ORF1bP314L,ORF3aL73F,ORF8_Q27**,<br>ORF8_R52I,ORF8_Y73C,S:S98F,S:D138H,S:N501Y,S:A570D,S:D614G,S:P681H,S:<br>D1118H                                                                                                                 |  |  |  |
| hCoV-19/Mexico/YUC-IndRE_FB17112_S3135/2021 | EPI_ISL_2663402 | B.1.1.7 | GRY |  |  | 38 | T728282A,G28881A,G28882A,G28883C,C28977T,C29722T<br>C241T,C913T,C2453T,C3037T,C3267T,C5388A,C5986T,T6954C,C9611T,G12163T,C14408T,C146<br>76T,C15279T,T16176C,C21855T,G21974C,A23063T,C23271A,A23403G,C23604A,C23709T,T245<br>06G,G24914C,C27972T,G28048T,A28111G,G28280C,A28281T,T28282A,A28295G,G28881A,G<br>8882A,G28883C,C28977T                                                                                                                                       |  |  |  |  | 23                                                                                                                                                                                                                     | 860L,S:S982A,S:D1118H<br>N:D3L,N:N8D,N:R203K,N:G204R,N:S235F,ORF1aL730F,ORF1aT1001I,ORF1a:<br>A1708D,ORF1aI2230T,ORF1aL3116F,ORF1bP314L,ORF3aL73F,ORF8_Q27*,<br>ORF8_R52I,ORF8_Y73C,S:S98F,S:D138H,S:N501Y,S:A570D,S:D614G,S:P681H,<br>S:T716I,S:S982A,S:D1118H                                                                                                   |  |  |  |
| hCoV-19/Mexico/YUC-IndRE_FB17453_S3932/2021 | EPI_ISL_2858946 | B.1.1.7 | GRY |  |  | 34 | C241T,C913T,C2453T,C3037T,C3267T,C5388A,C5986T,T6954C,C9611T,C14408T,C14676T,C152<br>79T,C16017T,T16176C,C21855T,A23063T,C23271A,A23403G,C23604A,C23709T,T24506G,G249<br>14C,A25336C,G25337C,C25731T,C26110T,C26735T,C27972T,G28048T,A28111G,G28280C,A28281<br>T,T28282A,G28881A,G28882A,G28883C,C28977T                                                                                                                                                                  |  |  |  |  | 24                                                                                                                                                                                                                     | S:T716I,S:S982A,S:D1118H<br>N:D3L,N:N8D,N:R203K,N:G204R,N:S235F,ORF1aL730F,ORF1aT1001I,ORF1a:<br>A1708D,ORF1aI2230T,ORF1aL3116F,ORF1bP314L,ORF3aL73F,ORF8_Q27*,<br>ORF8_R52I,ORF8_Y73C,S:S98F,S:N501Y,S:A570D,S:D614G,S:P681H,<br>S:T716I,S:S982A,S:D1118H                                                                                                        |  |  |  |
| hCoV-19/Mexico/YUC-IndRE_FB17480_S3493/2021 | EPI_ISL_2779008 | B.1.1.7 | GRY |  |  | 38 | C241T,C913T,C2453T,C3037T,C3267T,C5388A,C5986T,T6954C,C9611T,C14408T,C14676T,C152<br>79T,T16176C,C21855T,A23063T,C23271A,A23403G,C23604A,C23709T,T24506G,G24914C,A25<br>336C,G25337C,C25731T,C26110T,C26735T,C27972T,G28048T,A28111G,G28280C,A28281T,T282<br>82A,A28295G,C28657T,G28881A,G28882A,G28883C,C28977T                                                                                                                                                          |  |  |  |  | 26                                                                                                                                                                                                                     | T716I,S:S982A,S:D1118H,S:E1258D,S:D1259H<br>N:D3L,N:N8D,N:R203K,N:G204R,N:S235F,ORF1aL730F,ORF1aT1001I,ORF1a:<br>A1708D,ORF1aI2230T,ORF1aL3116F,ORF1bP314L,ORF3aL73F,ORF8_Q27*,<br>ORF8_R52I,ORF8_Y73C,S:S98F,S:N501Y,S:A570D,S:D614G,S:P681H,<br>S:T716I,S:S982A,S:D1118H                                                                                        |  |  |  |
| hCoV-19/Mexico/YUC-IndRE_FB17482_S3494/2021 | EPI_ISL_2779009 | B.1.1.7 | GRY |  |  | 34 | 28882A,G28883C,C28977T<br>C241T,C913T,A1163C,C2110T,A2863G,G3004T,C3037T,C3267T,C5388A,C5986T,T6954C,G7042T,<br>C7765T,C10789T,C14120T,C14408T,C14676T,G14857T,C15279T,G15672C,C15810T,T16176C,G<br>20679T,T22219C,G22567T,A23063T,C23271A,A23403G,C23604A,C23709T,T24506G,G24914C,<br>A25336C,G25337C,C25731T,C26110T,C26735T,C27972T,G28048T,A28111G,G28280C,A28281T<br>_T28282A,A28804G,G28881A,G28882A,G28883C,C28977T                                                |  |  |  |  | 24                                                                                                                                                                                                                     | 8H,S:E1258D,S:D1259H<br>N:D3L,N:R203K,N:G204R,N:S235F,ORF1aI300L,ORF1aE913D,ORF1aT1001I,<br>ORF1aA1708D,ORF1aI2230T,ORF1aM2259I,ORF1bP218I,ORF1bP314L,ORF1bP464F,OR<br>F1bE735D,ORF3aP240S,ORF8_Q27**,ORF8_R52I,ORF8_Y73C,S:L<br>335F,S:N501Y,S:A570D,S:D614G,S:P681H,S:T716I,S:S982A,S:D1118H,S:E1258<br>D,S:D1259H                                              |  |  |  |
| hCoV-19/Mexico/YUC-IndRE_FB17487_S3495/2021 | EPI_ISL_2779010 | B.1.1.7 | GRY |  |  | 42 | C241T,C913T,C2110T,G3004T,C3037T,C3267T,C5388A,C5654T,C5986T,T6954C,G7042T,C7765T,<br>C10789T,C14120T,C14408T,C14676T,G14857T,C15279T,G15672C,C15810T,T16176C,G20679T,<br>T22219C,G22567T,A23063T,C23271A,A23403G,C23604A,C23709T,T24506G,G24914C,A25336<br>C,G25337C,C25731T,C26110T,C26735T,C27002T,C27972T,G28048T,A28111G,G28280C,A2828<br>1T,T28282A,A28804G,G28881A,G28882A,G28883C,C28977T                                                                         |  |  |  |  | 28                                                                                                                                                                                                                     | D,S:D1259H<br>N:D3L,N:R203K,N:G204R,N:S235F,ORF1aE913D,ORF1aT1001I,ORF1aA1708<br>D,ORF1aI2230T,ORF1aM2259I,ORF1bP218I,ORF1bP314L,ORF1bP464F,OR<br>F1bE735D,ORF3aP240S,ORF8_Q27**,ORF8_R52I,ORF8_Y73C,S:L335F,S:N501Y,<br>S:A570D,S:D614G,S:P681H,S:T716I,S:S982A,S:D1118H,S:E1258D,S:D1259H                                                                       |  |  |  |
| hCoV-19/Mexico/YUC-IndRE_FB17495_S3496/2021 | EPI_ISL_2779011 | B.1.1.7 | GRY |  |  | 48 | 1T,T28282A,A28804G,G28881A,G28882A,G28883C,C28977T<br>C241T,G353A,C913T,C2453T,C3037T,C3267T,C5388A,C5986T,T6954C,C9611T,C9893T,C14408T,<br>C14676T,C15279T,T16176C,C21855T,G21974C,A23063T,C23271A,A23403G,C23604A,C23709T,<br>T24506G,G24914C,A25336C,G25440T,C25844T,G27382C,A27383T,T27384C,C27972T,G28048T<br>_A28111G,G28280C,A28281T,T28282A,A28295G,G28881A,G28882A,G28883C,C28977T                                                                               |  |  |  |  | 27                                                                                                                                                                                                                     | N:D3L,N:N8D,N:R203K,N:G204R,N:S235F,ORF1aG30S,ORF1aL730F,ORF1aT1<br>001I,ORF1aA1708D,ORF1aI2230T,ORF1aL3116F,ORF1aL3210F,ORF1bP31<br>4L,ORF3aL16N,ORF3aL15I,ORF6_D61L,ORF8_Q27**,ORF8_R52I,ORF8_Y73C,S:<br>29                                                                                                                                                     |  |  |  |
| hCoV-19/Mexico/YUC-IndRE_FB17498_S2779012   | EPI_ISL_2779012 | B.1.1.7 | GRY |  |  | 42 | C241T,C913T,C2110T,C3037T,C3267T,C5388A,C5986T,T6954C,G7042T,A10195G,C10279T,C141<br>20T,C14408T,C14676T,C15279T,T16176C,C16887T,G17427T,A23063T,C23271A,A23403G,C236<br>04A,C23709T,T24506G,G24914C,A25336C,G25337C,A27943G,C27972T,G28048T,G28075T,A28<br>11G,G28280C,A28281T,T28282A,G28881A,G28882A,G28883C,C28977T                                                                                                                                                   |  |  |  |  | 29                                                                                                                                                                                                                     | S98F,S:D138H,S:N501Y,S:A570D,S:D614G,S:P681H,S:T716I,S:S982A,S:D1118H,S:<br>N:D3L,N:R203K,N:G204R,N:S235F,ORF1aT1001I,ORF1aI1708D,ORF1aI2230<br>T,ORF1aM2259I,ORF1bP218I,ORF1bP314L,ORF8_H17R,ORF8_Q27**,ORF8_R<br>52I,ORF8_C61F,ORF8_Y73C,S:N501Y,S:A570D,S:D614G,S:P681H,S:T716I,S:S982<br>A,S:D1118H,S:E1258D,S:D1259H                                         |  |  |  |
| hCoV-19/Mexico/YUC-IndRE_FB17499_S3498/2021 | EPI_ISL_2779013 | B.1.1.7 | GRY |  |  | 39 | 111G,G28280C,A28281T,T28282A,G28881A,G28882A,G28883C,C28977T<br>C241T,C913T,C2469T,C3037T,C3267T,T4966C,C5388A,C5986T,T6954C,C7299T,C7945T,C12099T<br>_C14184T,C14408T,C14676T,T15096C,C15279T,T16176C,A23063T,C23271A,A23403G,C23604A,<br>C23709T,G24140C,T24506G,G24914C,A25336C,G25337C,C27972T,G28048T,A28111G,G28280C<br>_A28281T,T28282A,A28804G,G28881A,G28882A,G28883C,C28977T                                                                                    |  |  |  |  | 24                                                                                                                                                                                                                     | S,D1118H,S:E1258D,S:D1259H<br>N:D3L,N:R203K,N:G204R,N:S235F,ORF1aA735V,ORF1aT1001I,ORF1aA1708<br>D,ORF1aI2230T,ORF1aA2345V,ORF1aA3945V,ORF1bP314L,ORF8_Q27**,ORF<br>8_R52I,ORF8_Y73C,S:N501Y,S:A570D,S:D614G,S:P681H,S:T716I,S:S982A,S<br>982A,S:D1118H,S:E1258D,S:D1259H                                                                                         |  |  |  |
| hCoV-19/Mexico/YUC-IndRE_FB17502_S3499/2021 | EPI_ISL_2779014 | B.1.1.7 | GRY |  |  | 41 | A28281T,T28282A,A28877T,G28878C,G28881A,G28882A,G28883C,C28977T,C29722T<br>A107T,C241T,C913T,C2453T,C3037T,C3267T,C5388A,C5986T,T6954C,C9611T,C14408T,C14676T<br>_C15279T,T16176C,C18568T,C21855T,G21974C,A23063T,C23271A,A23403G,C23604A,C23709T<br>_T24506G,G24914C,A25336C,G25337C,C27536T,G27754T,C27972T,G28048T,A28111G,G2828<br>28                                                                                                                                 |  |  |  |  | 24                                                                                                                                                                                                                     | 2A,S:D1118H,S:E1258D,S:D1259H<br>N:D3L,N:N8D,N:R203K,N:G204R,N:S235F,ORF1aL730F,ORF1aT1001I,ORF1a:<br>A1708D,ORF1aI2230T,ORF1aL3116F,ORF1bP314L,ORF3aL73F,ORF8_Q27*,<br>ORF8_R52I,ORF8_Y73C,S:S98F,S:D138H,S:N501Y,S:<br>28                                                                                                                                       |  |  |  |
| hCoV-19/Mexico/YUC-IndRE_FB17506_S3500/2021 | EPI_ISL_2779015 | B.1.1.7 | GRY |  |  | 39 | OC,A28281T,T28282A,A28295G,G28881A,G28882A,G28883C,C28977T<br>C241T,C913T,C2110T,G3004T,C3037T,C3267T,G4288T,C5388A,C5986T,T6954C,G7042T,C7765T,<br>C10789T,T1125C,C14120T,C14408T,C14676T,G14857T,C15279T,G15672C,C15810T,T16176C,G<br>20679T,T22219C,G22567T,A23063T,C23271A,A23403G,C23604A,C23709T,T24506G,G24914<br>C,A25336C,G25337C,C25731T,C26110T,C26735T,C27002T,C27972T,G28048T,A28111G,G2828<br>48                                                            |  |  |  |  | 28                                                                                                                                                                                                                     | A570D,S:D614G,S:P681H,S:T716I,S:S982A,S:D1118H,S:E1258D,S:D1259H<br>N:D3L,N:R203K,N:G204R,N:S235F,ORF1aE913D,ORF1aT1001I,ORF1aE134I<br>D,ORF1aA1708D,ORF1aI2230T,ORF1aM2259I,ORF1bP218I,ORF1bP314L,<br>ORF1bV464F,ORF1bE735D,ORF3aP240S,ORF8_Q27**,ORF8_R52I,ORF8_Y73C,<br>S:L335F,S:N501Y,S:A570D,S:D614G,S:P681H,S:T716I,S:S982A,S:D1118H,S:E12<br>58D,S:D1259H |  |  |  |
| hCoV-19/Mexico/YUC-IndRE_FB17511_S3501/2021 | EPI_ISL_2779016 | B.1.1.7 | GRY |  |  | 49 | OC,A28281T,T28282A,A28804G,G28881A,G28882A,G28883C,C28977T<br>C241T,C913T,C2453T,C3037T,G3083A,C3267T,C5388A,C5986T,A6575T,T6954C,C9611T,C14408<br>T,C14676T,C15279T,T16176C,C20930T,C21707T,C21855T,A23063T,C23271A,A23403G,C23604<br>A,C23709T,T24506G,G24914C,A25336C,G25337C,C27972T,G28048T,A28111G,G28280C,A282<br>81T,T28282A,A28295G,G28881A,G28882A,G28883C,C28977T                                                                                              |  |  |  |  | 28                                                                                                                                                                                                                     | S:A570D,S:D614G,S:P681H,S:T716I,S:S982A,S:D1118H,S:E1258D,S:D1259H<br>N:D3L,N:R203K,N:G204R,N:S235F,ORF1aT1001I,ORF1aA1708D,ORF1aI2230<br>T,ORF1aM2259I,ORF1bP218I,ORF1bP314L,ORF8_H17R,ORF8_Q27**,ORF8_R<br>52I,ORF8_C61F,ORF8_Y73C,S:LQ14H,S:N501Y,S:A570D,S:D614G,S:P681H,S:T<br>716I,S:S982A,S:D1118H,S:E1258D                                                |  |  |  |
| hCoV-19/Mexico/YUC-IndRE_FB17518_S3502/2021 | EPI_ISL_2779017 | B.1.1.7 | GRY |  |  | 38 | 81T,T28282A,A28295G,G28881A,G28882A,G28883C,C28977T<br>C241T,C913T,C2110T,C3037T,C3267T,C5388A,C5986T,T6954C,G7042T,A10195G,C10279T,C141<br>20T,C14408T,C14676T,C15279T,T16176C,C16887T,G17427T,G21604T,A23063T,C23271A,A234<br>03G,C23604A,C23709T,T24506G,G24914C,A25336C,C25413T,A27943G,C27972T,G28048T,G28<br>40                                                                                                                                                     |  |  |  |  | 28                                                                                                                                                                                                                     | S:A570D,S:D614G,S:P681H,S:T716I,S:S982A,S:D1118H,S:E1258D,S:D1259H<br>N:D3L,N:R203K,N:G204R,N:S235F,ORF1aT1001I,ORF1aA1708D,ORF1aI2230<br>T,ORF1aM2259I,ORF1bP218I,ORF1bP314L,ORF8_H17R,ORF8_Q27**,ORF8_R<br>52I,ORF8_C61F,ORF8_Y73C,S:Q14H,S:N501Y,S:A570D,S:D614G,S:P681H,S:T7<br>16I,S:S982A,S:D1118H,S:E1258D                                                 |  |  |  |
| hCoV-19/Mexico/YUC-IndRE_FB17531_S3503/2021 | EPI_ISL_2779018 | B.1.1.7 | GRY |  |  | 40 | 075T,A28111G,G28280C,A28281T,T28282A,G28881A,G28882A,G28883C,C28977T<br>C241T,C913T,C2110T,G3004T,C3037T,C3267T,A4108G,C5388A,C5986T,T6954C,G7042T,C7765T<br>_C10789T,C14120T,C14408T,C14676T,G14857T,C15279T,G15672C,C15810T,T16176C,G20679T,<br>T22219C,G22567T,A23063T,C23271A,A23403G,C23604A,C23709T,T24506G,G24914C,A25336<br>C,C25731T,C26110T,C26735T,C27002T,C27972T,G28048T,A28111G,G28280C,A28281T,T28282<br>A,G28877T,A28804G,G28881A,G28882A,G28883C,C28977T |  |  |  |  | 27                                                                                                                                                                                                                     | N:D3L,N:A1525,N:R203K,N:G204R,N:S235F,ORF1aE913D,ORF1aT1001I,ORF1a<br>A1708D,ORF1aI2230T,ORF1aM2259I,ORF1bP218I,ORF1bP314L,ORF1bV<br>464F,ORF1bE735D,ORF3aP240S,ORF8_Q27**,ORF8_R52I,ORF8_Y73C,S:L335F,<br>S:N501Y,S:A570D,S:D614G,S:P681H,S:T716I,S:S982A,S:D1118H,S:E1258D                                                                                      |  |  |  |
| hCoV-19/Mexico/YUC-IndRE_FB17561_S3505/2021 | EPI_ISL_2779020 | B.1.1.7 | GRY |  |  | 48 | A,G28277T,A28804G,G28881A,G28882A,G28883C,C28977T                                                                                                                                                                                                                                                                                                                                                                                                                         |  |  |  |  | 27                                                                                                                                                                                                                     |                                                                                                                                                                                                                                                                                                                                                                   |  |  |  |

|                                             |                 |         |     |                                                                                                                                                                                                                                                                                                                                                                                                                                                                                                       |  |  |                                                                                                                                                                                                                                                                                                                                                                                                                       |   |     |
|---------------------------------------------|-----------------|---------|-----|-------------------------------------------------------------------------------------------------------------------------------------------------------------------------------------------------------------------------------------------------------------------------------------------------------------------------------------------------------------------------------------------------------------------------------------------------------------------------------------------------------|--|--|-----------------------------------------------------------------------------------------------------------------------------------------------------------------------------------------------------------------------------------------------------------------------------------------------------------------------------------------------------------------------------------------------------------------------|---|-----|
|                                             |                 |         |     | C241T,C913T,C2110T,G3004T,C3037T,C3267T,C4055T,C5388A,C5986T,T6954C,G7042T,C7765T,C10789T,C14120T,C14408T,C14676T,G14857T,C15279T,T16176C,G20208T,T22219C,G22567T,A23063T,C23271A,A23403G,C23604A,C23709T,T24506G,G24914C,A25336C,C25731T,C26110T                                                                                                                                                                                                                                                     |  |  | N:D3L:N:R203K,N:G204R,N:S235F,ORF1a:E913D,ORF1a:T0011,ORF1a:H1264                                                                                                                                                                                                                                                                                                                                                     |   |     |
| hCoV-19/Mexico/YUC-IndRE_FB17570_S3506/2021 | EPI_ISL_2779021 | B.1.1.7 | GRY | 44 C26735T,C27972T,G28048T,A28111G,G28280C,A28281T,T28282A,A28804G,G28881A,G28882C,C241T,C913T,C2110T,G3004T,C3037T,C3267T,C4055T,C5388A,C5986T,T6954C,G7042T,C7765T,T611837T,T12283C,C14120T,C14408T,C14676T,G14857T,C15279T,G15672C,C15810T,T16176C,C20164T,G20679T,C21587T,T22219C,G22567T,A23063T,C23271A,A23403G,C23604A,C23709T,T24506G,G24914C,A25336C,G25337C,C25731T,C26110T,C27002T,C27972T,G28048T,A28111G,G28280C,A28281T,T28282A,A28804G,A28877T,G28878C,G28881A,G28882A,G28883C,C28977T |  |  | 27 YORF1a:A1708D,ORF1a:I2230T,ORF1a:M2259I,ORF1b:P218L,ORF1b:P314L,ORF1b:V464F,ORF1b:Q2247H,ORF3a:P240S,ORF8:Q27*,ORF8:R52I,ORF8:Y73C,S:L335F,S:N501Y,S:A570D,S:D614G,S:P681H,S:T716I,S:S982A,S:D1118H,S:52I,ORF8:Y73C,S:P95S,S:L335F,S:N501Y,S:A570D,S:D614G,S:P681H,S:T716I,S:S982A,S:D1118H,S:2I,ORF8:Y73C,S:P95S,S:L335F,S:N501Y,S:A570D,S:D614G,S:P681H,S:T716I,S:S982A,S:D1118H,S:2A,S:D1118H,S:E1258D,S:D1259H | 6 | 0   |
| hCoV-19/Mexico/YUC-IndRE_FB17577_S3507/2021 | EPI_ISL_2779022 | B.1.1.7 | GRY | 53 C241T,C913T,C2110T,G3004T,C3037T,C3267T,C5388A,C5986T,T6954C,C9611T,C14408T,C14676T,C15279T,T16176C,T18099C,C21855T,G21974C,A23063T,C23271A,A23403G,C23604A,C23709T,T24506G,G24914C,A25336C,G25523T,G25526T,C25609T,C27972T,G28048T,A28111G,G28280C,A28281T,T28282A,A28295G,G28881A,G28882A,G28883C,C28977T                                                                                                                                                                                        |  |  | 30 N:D3L:N:N8D,N:R203K,N:G204R,N:S235F,ORF1a:L730F,ORF1a:T0011,ORF1a:A1708D,ORF1a:I2230T,ORF1a:L3116F,ORF1b:P314L,ORF3a:G44V,ORF3a:W45L,ORF3a:L73F,ORF8:Q27*,ORF8:R52I,ORF8:Y73C,S:S98F,S:D138H,S:N501Y,S:A570D,S:D614G,S:P681H,S:T716I,S:S982A,S:D1118H,S:E1258D                                                                                                                                                     | 6 | 0   |
| hCoV-19/Mexico/YUC-IndRE_FB17580_S3508/2021 | EPI_ISL_2779023 | B.1.1.7 | GRY | 39 C241T,C823T,C913T,C1758T,C2110T,G3004T,C3037T,C3267T,C5388A,C5986T,T6954C,G7042T,C9559T,C13329T,C14120T,C14408T,C14676T,C15279T,T16176C,A23063T,C23271A,A23403G,C23604A,C23709T,T24506G,G24914C,C25731T,C26110T,C27002T,C27972T,G28048T,A28095T,A28111G,G28280C,A28281T,T28282A,A28804G,G28881A,G28882A,G28883C,C28977T                                                                                                                                                                            |  |  | 27 N:D3L:N:R203K,N:G204R,N:S235F,ORF1a:A498V,ORF1a:E913D,ORF1a:T0011,ORF1a:A1708D,ORF1a:I2230T,ORF1a:M2259I,ORF1b:P218L,ORF1b:P314L,ORF3a:P240S,ORF8:Q27*,ORF8:R52I,ORF8:Y73C,S:N501Y,S:A570D,S:D614G,S:P681H,S:T716I,S:S982A,S:D1118H                                                                                                                                                                                | 6 | 0   |
| hCoV-19/Mexico/YUC-IndRE_FB18961_S4481/2021 | EPI_ISL_3033335 | B.1.1.7 | GRY | 41 C241T,C913T,C2110T,G3004T,C3037T,C3267T,C5388A,C5986T,T6954C,G7042T,C7765T,C10789T,C14120T,C14408T,C14676T,G14857T,C15279T,G15672C,C15810T,T16176C,C19524T,G20679T,T22219C,G22567T,A23063T,C23271A,A23403G,C23604A,C23709T,T24506G,G24914C,C25731T,C26110T,C26735T,C27002T,C27972T,G28048T,A28095T,A28111G,G28280C,A28281T,T28282A,A28804G,G28881A,G28882A,G28883C,C28977T                                                                                                                         |  |  | 26 N:D3L:N:R203K,N:G204R,N:S235F,ORF1a:E913D,ORF1a:T0011,ORF1a:A1708D,ORF1a:I2230T,ORF1a:M2259I,ORF1b:P218L,ORF1b:P314L,ORF1b:V464F,ORF1b:E735D,ORF3a:P240S,ORF8:Q27*,ORF8:R52I,ORF8:Y73C,S:L335F,S:N501Y,S:A570D,S:D614G,S:P681H,S:T716I,S:S982A,S:D1118H                                                                                                                                                            | 6 | 0   |
| hCoV-19/Mexico/YUC-IndRE_FB18962_S4482/2021 | EPI_ISL_3033336 | B.1.1.7 | GRY | 47 2A,A28804G,G28881A,G28882A,G28883C,C28977T                                                                                                                                                                                                                                                                                                                                                                                                                                                         |  |  | 26 N:D3L:N:R203K,N:G204R,N:S235F,ORF1a:E913D,ORF1a:T0011,ORF1a:A1708D,ORF1a:I2230T,ORF1a:M2259I,ORF1b:P218L,ORF1b:P314L,ORF1b:V464F,ORF1b:E735D,ORF3a:P240S,ORF8:Q27*,ORF8:R52I,ORF8:Y73C,S:L335F,S:N501Y,S:A570D,S:D614G,S:P681H,S:T716I,S:S982A,S:D1118H                                                                                                                                                            | 6 | 0   |
| hCoV-19/Mexico/YUC-IndRE_FB18966_S4483/2021 | EPI_ISL_3033337 | B.1.1.7 | GRY | 47 2A,A28804G,G28881A,G28882A,G28883C,C28977T                                                                                                                                                                                                                                                                                                                                                                                                                                                         |  |  | 26 N:D3L:N:R203K,N:G204R,N:S235F,ORF1a:E913D,ORF1a:T0011,ORF1a:A1708D,ORF1a:I2230T,ORF1a:M2259I,ORF1b:P218L,ORF1b:P314L,ORF1b:V464F,ORF1b:E735D,ORF3a:P240S,ORF8:Q27*,ORF8:R52I,ORF8:Y73C,S:L335F,S:N501Y,S:A570D,S:D614G,S:P681H,S:T716I,S:S982A,S:D1118H                                                                                                                                                            | 6 | 0   |
| hCoV-19/Mexico/YUC-IndRE_FB19001_S4484/2021 | EPI_ISL_3033338 | B.1.1.7 | GRY | 48 T28282A,A28804G,G28881A,G28882A,G28883C,C28977T                                                                                                                                                                                                                                                                                                                                                                                                                                                    |  |  | 26 N:D3L:N:R203K,N:G204R,N:S235F,ORF1a:E913D,ORF1a:T0011,ORF1a:A1708D,ORF1a:I2230T,ORF1a:M2259I,ORF1b:P218L,ORF1b:P314L,ORF1b:V464F,ORF1b:E735D,ORF3a:P240S,ORF8:Q27*,ORF8:R52I,ORF8:Y73C,S:L335F,S:N501Y,S:A570D,S:D614G,S:P681H,S:T716I,S:S982A,S:D1118H                                                                                                                                                            | 6 | 0   |
| hCoV-19/Mexico/YUC-IndRE_FB19002_S4485/2021 | EPI_ISL_3033339 | B.1.1.7 | GRY | 48 T28282A,A28804G,G28881A,G28882A,G28883C,C28977T                                                                                                                                                                                                                                                                                                                                                                                                                                                    |  |  | 26 N:D3L:N:R203K,N:G204R,N:S235F,ORF1a:T0011,ORF1a:A1708D,ORF1a:I2230T,ORF1a:M2259I,ORF1b:P218L,ORF1b:P314L,ORF1b:V464F,ORF1b:E735D,ORF3a:P240S,ORF8:Q27*,ORF8:R52I,ORF8:Y73C,S:L335F,S:N501Y,S:A570D,S:D614G,S:P681H,S:T716I,S:S982A,S:D1118H                                                                                                                                                                        | 6 | 0   |
| hCoV-19/Mexico/YUC-IndRE_FB19014_S4486/2021 | EPI_ISL_3033340 | B.1.1.7 | GRY | 39 36,G,C23604A,C23709T,T24506G,G24914C,A27943G,C27972T,G28048T,G28075T,A28095T,A28111G,G28280C,A28281T,T28282A,G28881A,G28882A,G28883C,C28977T                                                                                                                                                                                                                                                                                                                                                       |  |  | 24 46,G,S:P681H,S:T716I,S:S982A,S:D1118H                                                                                                                                                                                                                                                                                                                                                                              | 6 | 0   |
| hCoV-19/Mexico/YUC-IndRE_FB19014_S4486/2021 | EPI_ISL_3033340 | B.1.1.7 | GRY | 39 36,G,C23604A,C23709T,T24506G,G24914C,A27943G,C27972T,G28048T,G28075T,A28095T,A28111G,G28280C,A28281T,T28282A,G28881A,G28882A,G28883C,C28977T                                                                                                                                                                                                                                                                                                                                                       |  |  | 24 46,G,S:P681H,S:T716I,S:S982A,S:D1118H                                                                                                                                                                                                                                                                                                                                                                              | 6 | 0   |
| hCoV-19/Mexico/YUC-INMEGEN-05-06-196/2021   | EPI_ISL_2603685 | B.1.1.7 | GRY | 48 T28282A,A28804G,G28881A,G28882A,G28883C,C28977T                                                                                                                                                                                                                                                                                                                                                                                                                                                    |  |  | 27 Y73C,S:L335F,S:N501Y,S:A570D,S:D614G,S:P681H,S:T716I,S:S982A,S:D1118H                                                                                                                                                                                                                                                                                                                                              | 6 | 277 |
| hCoV-19/Mexico/YUC-INMEGEN-05-06-222/2021   | EPI_ISL_2603706 | B.1.1.7 | GRY | 46 46,G,G28881A,G28882A,G28883C,C28977T                                                                                                                                                                                                                                                                                                                                                                                                                                                               |  |  | 26 N:D3L:N:R203K,N:G204R,N:S235F,ORF1a:T0011,ORF1a:A1708D,ORF1a:I2230T,ORF1a:M2259I,ORF1b:P218L,ORF1b:P314L,ORF1b:V464F,ORF1b:E735D,ORF3a:P240S,ORF8:Q27*,ORF8:R52I,ORF8:Y73C,S:L335F,S:N501Y,S:A570D,S:D614G,S:P681H,S:T716I,S:S982A,S:D1118H                                                                                                                                                                        | 6 | 10  |
| hCoV-19/Mexico/YUC-INMEGEN-05-06-269/2021   | EPI_ISL_2603739 | B.1.1.7 | GRY | 23 280C,A28281T,T28282A,G28881A,G28882A,G28883C,C28977T                                                                                                                                                                                                                                                                                                                                                                                                                                               |  |  | 23 716I,S:S982A,S:D1118H                                                                                                                                                                                                                                                                                                                                                                                              | 6 | 0   |
| hCoV-19/Mexico/YUC-INMEGEN-05-06-277/2021   | EPI_ISL_2603746 | B.1.1.7 | GRY | 46 46,G,G28881A,G28882A,G28883C,C28977T                                                                                                                                                                                                                                                                                                                                                                                                                                                               |  |  | 26 N:D3L:N:R203K,N:G204R,N:S235F,ORF1a:E913D,ORF1a:T0011,ORF1a:A1708D,ORF1a:I2230T,ORF1a:M2259I,ORF1b:P218L,ORF1b:P314L,ORF1b:V464F,ORF1b:E735D,ORF3a:P240S,ORF8:Q27*,ORF8:R52I,ORF8:Y73C,S:L335F,S:N501Y,S:A570D,S:D614G,S:P681H,S:T716I,S:S982A,S:D1118H                                                                                                                                                            | 6 | 11  |
| hCoV-19/Mexico/YUC-INMEGEN-06-01-258/2021   | EPI_ISL_2616939 | B.1.1.7 | GRY | 35 881A,G28882A,G28883C,C28977T                                                                                                                                                                                                                                                                                                                                                                                                                                                                       |  |  | 24 S:P681H,S:T716I,S:S982A,S:D1118H                                                                                                                                                                                                                                                                                                                                                                                   | 6 | 411 |
| hCoV-19/Mexico/YUC-INMEGEN-06-01-271/2021   | EPI_ISL_2616910 | B.1.1.7 | GRY | 44 C26735T,C27972T,G28048T,A28111G,G28280C,A28281T,T28282A,A28804G,G28881A,G28882C,C241T,C913T,C2110T,G3004T,C3037T,C3267T,C5388A,C5986T,T6954C,G7042T,C9559T,C14120T,C14408T,C14676T,G14857T,C15279T,T16176C,A23063T,C23271A,A23403G,C23604A,C23709T,T24506G,G24914C,C25731T,C26110T,C27002T,C27972T,G28048T,A28095T,A28111G,G28280C,A28281T,T28282A,G28881A,G28882A,G28883C,C28977T                                                                                                                 |  |  | 26 N:D3L:N:R203K,N:G204R,N:S235F,ORF1a:E913D,ORF1a:T0011,ORF1a:A1708D,ORF1a:I2230T,ORF1a:M2259I,ORF1b:P218L,ORF1b:P314L,ORF1b:V464F,ORF1b:E735D,ORF3a:P240S,ORF8:Q27*,ORF8:R52I,ORF8:Y73C,S:L335F,S:N501Y,S:A570D,S:D614G,S:P681H,S:T716I,S:S982A,S:D1118H                                                                                                                                                            | 6 | 585 |
| hCoV-19/Mexico/YUC-INMEGEN-06-01-284/2021   | EPI_ISL_2616967 | B.1.1.7 | GRY | 37 28282A,G28881A,G28882A,G28883C,C28977T                                                                                                                                                                                                                                                                                                                                                                                                                                                             |  |  | 24 D614G,S:P681H,S:T716I,S:S982A,S:D1118H                                                                                                                                                                                                                                                                                                                                                                             | 6 | 218 |

|                                           |                 |         |     |    |                                                                                                                                                                                                                                                                                                                                                                                          |                                                                                                                                                                                                                                                                               |    |      |
|-------------------------------------------|-----------------|---------|-----|----|------------------------------------------------------------------------------------------------------------------------------------------------------------------------------------------------------------------------------------------------------------------------------------------------------------------------------------------------------------------------------------------|-------------------------------------------------------------------------------------------------------------------------------------------------------------------------------------------------------------------------------------------------------------------------------|----|------|
| hCoV-19/Mexico/YUC-INMEGEN-06-01-299/2021 | EPI_ISL_2616968 | B.1.1.7 | GRY | 48 | C241T,C913T,C2110T,G3004T,C3037T,C3267T,C5388A,C5986T,T6954C,G7042T,C7765T,C10789T,C14120T,C14408T,C14676T,G14857T,C15279T,G15672C,C15810T,T16176C,G20679T,T2219T,C,G22567T,A23063T,C23271A,A23403G,C23604A,C23709T,T24506G,G24914C,C25731T,C26110T,G26506T,C26735T,C26882T,C27002T,C27972T,G28048T,A28095T,A28111G,G28280C,A28280C                                                      | N:D3L:N:R203K,N:G204R,N:S235F,ORF1a:E913D,ORF1a:T1001,ORF1a:A1708D,ORF1a:I2230T,ORF1a:M2259I,ORF1b:P218L,ORF1b:P314L,ORF1b:V464F,ORF1b:E735D,ORF3a:P240S,ORF8:Q27*,ORF8:R52I,ORF8:K68*,ORF8:Y73C,S:L335F,S:N501Y,S:A570D,S:D614G,S:P681H,S:T716I,S:S982A,S:D1118H             | 26 | 162  |
| hCoV-19/Mexico/YUC-INMEGEN-06-01-307/2021 | EPI_ISL_2616932 | B.1.1.7 | GRY | 35 | C241T,C913T,C2110T,G3004T,C3037T,C3267T,C5388A,C5986T,T6954C,C9611T,C9893T,C13860T,C14408T,C14676T,C15279T,T16176C,G18429C,C21855T,G21974C,A23063T,C23271A,A23403G,C23604A,C23709T,T24506G,G24914C,C25731T,C26110T,G26506T,C26735T,C26882T,C27002T,C27972T,G28048T,A28095T,A28111G,G28280C,A28280C                                                                                       | N:N8D,N:R203K,N:G204R,N:S235F,ORF1a:L730F,ORF1a:T1001,ORF1a:A1708D,ORF1a:I2230T,ORF1a:L3116F,ORF1a:L3210F,ORF1b:P314L,ORF8:Q27*,ORF8:R52I,ORF8:Y73C,S:S98F,S:D138H,S:N501Y,S:A570D,S:D614G,S:P681H,S:T716I,S:S982A,S:D1118H                                                   | 23 | 159  |
| hCoV-19/Mexico/YUC-INMEGEN-06-01-319/2021 | EPI_ISL_2616984 | B.1.1.7 | G   | 42 | C241T,C913T,C2110T,G3004T,C3037T,C3267T,C5388A,C5986T,T6954C,G7042T,C7765T,C10789T,C14120T,C14408T,C14676T,G14857T,C15279T,G15672C,C15810T,T16176C,G20679T,T2219T,C,G22567T,C23271A,A23403G,C23604A,C23709T,T24506G,G24914C,C25731T,C26110T,G26506T,C26735T,C27002T,C27972T,G28048T,A28095T,A28111G,G28280C,A28281T,T28282A,A28804G,C28977T                                              | N:D3L:N:R203K,N:G204R,N:S235F,ORF1a:E913D,ORF1a:T1001,ORF1a:A1708D,ORF1a:I2230T,ORF1a:M2259I,ORF1b:P218L,ORF1b:P314L,ORF1b:V464F,ORF1b:E735D,ORF3a:P240S,ORF8:Q27*,ORF8:R52I,ORF8:K68*,ORF8:Y73C,S:L335F,S:A570D,S:D614G                                                      | 23 | 2184 |
| hCoV-19/Mexico/YUC-INMEGEN-06-01-330/2021 | EPI_ISL_2616970 | B.1.1.7 | GRY | 46 | C241T,C913T,C2110T,G3004T,C3037T,C3267T,C5388A,C5986T,T6954C,C9611T,C14408T,C14676T,C15279T,T16176C,G20352A,C20946T,C21855T,G21974C,A23063T,C23271A,A23403G,C23604A,C23709T,T24506G,G24914C,C25731T,C26110T,G26506T,C26735T,C27002T,C27972T,G28048T,A28095T,A28111G,G28280C,A28281T,T28282A,A28804G,G28881A,G28883C,C28977T                                                              | N:D3L:N:R203K,N:G204R,N:S235F,ORF1a:E913D,ORF1a:T1001,ORF1a:A1708D,ORF1a:I2230T,ORF1a:M2259I,ORF1b:P218L,ORF1b:P314L,ORF1b:V464F,ORF1b:E735D,ORF3a:P240S,ORF8:Q27*,ORF8:R52I,ORF8:K68*,ORF8:Y73C,S:L335F,S:A570D,S:D614G                                                      | 26 | 8    |
| hCoV-19/Mexico/YUC-INMEGEN-06-01-338/2021 | EPI_ISL_2616966 | B.1.1.7 | GRY | 34 | C241T,C913T,C2110T,G3004T,C3037T,C3267T,C5388A,C5986T,T6954C,G7042T,C7765T,C10789T,C14120T,C14408T,C14676T,G14857T,C15279T,G15672C,C15810T,T16176C,G20679T,T2219T,C,G22567T,C23271A,A23403G,C23604A,C23709T,T24506G,G24914C,C25731T,C26110T,G26506T,C26735T,C27002T,C27972T,G28048T,A28095T,A28111G,G28280C,A28281T,T28282A,A28804G,G28881A,G28883C,C28977T                              | N:N8D,N:R203K,N:G204R,N:S235F,ORF1a:L730F,ORF1a:T1001,ORF1a:A1708D,ORF1a:I2230T,ORF1a:L3116F,ORF1a:L3210F,ORF1b:P314L,ORF8:Q27*,ORF8:R52I,ORF8:Y73C,S:S98F,S:D138H,S:N501Y,S:A570D,S:D614G,S:P681H,S:T716I,S:S982A,S:D1118H                                                   | 23 | 3    |
| hCoV-19/Mexico/YUC-INMEGEN-06-02-116/2021 | EPI_ISL_2692641 | B.1.1.7 | GR  | 45 | C241T,C913T,C2110T,G3004T,C3037T,C3267T,C5388A,C5986T,T6954C,G7042T,C7765T,C10789T,C14120T,C14408T,C14676T,G14857T,C15279T,G15672C,C15810T,T16176C,G20679T,T2219T,C,G22567T,C23271A,A23403G,C23604A,C23709T,T24506G,G24914C,C25731T,C26110T,G26506T,C26735T,C27002T,C27972T,G28048T,A28095T,A28111G,G28280C,A28281T,T28282A,A28804G,C28977T                                              | N:D3L:N:R203K,N:G204R,N:S235F,ORF1a:E913D,ORF1a:T1001,ORF1a:A1708D,ORF1a:I2230T,ORF1a:M2259I,ORF1b:P218L,ORF1b:P314L,ORF1b:V464F,ORF1b:E735D,ORF3a:P240S,ORF8:Q27*,ORF8:R52I,ORF8:K68*,ORF8:Y73C,S:L335F,S:A570D,S:D614G,S:P681H,S:T716I,S:S982A,S:D1118H                     | 24 | 1573 |
| hCoV-19/Mexico/YUC-INMEGEN-06-02-136/2021 | EPI_ISL_2692657 | B.1.1.7 | GRY | 49 | A28281T,T28282A,A28804G,G28881A,G28882A,G28883C,C28977T                                                                                                                                                                                                                                                                                                                                  | N:D3L:N:R203K,N:G204R,N:S235F,ORF1a:E913D,ORF1a:T1001,ORF1a:A1708D,ORF1a:I2230T,ORF1a:M2259I,ORF1b:P218L,ORF1b:P314L,ORF1b:V464F,ORF1b:E735D,ORF3a:P240S,ORF8:Q27*,ORF8:R52I,ORF8:K68*,ORF8:Y73C,S:L335F,S:N501Y,S:A570D,S:D614G,S:P681H,S:T716I,S:S982A,S:D1118H             | 26 | 21   |
| hCoV-19/Mexico/YUC-INMEGEN-06-02-141/2021 | EPI_ISL_2692662 | B.1.1.7 | GRY | 47 | A28804G,G28881A,G28882A,G28883C,C28977T                                                                                                                                                                                                                                                                                                                                                  | N:D3L:N:R203K,N:G204R,N:S235F,ORF1a:E913D,ORF1a:T1001,ORF1a:A1708D,ORF1a:I2230T,ORF1a:M2259I,ORF1b:P218L,ORF1b:P314L,ORF1b:V464F,ORF1b:E735D,ORF3a:P240S,ORF8:Q27*,ORF8:R52I,ORF8:K68*,ORF8:Y73C,S:L335F,S:N501Y,S:A570D,S:D614G,S:P681H,S:T716I,S:S982A,S:D1118H             | 26 | 15   |
| hCoV-19/Mexico/YUC-INMEGEN-06-02-160/2021 | EPI_ISL_2692676 | B.1.1.7 | GRY | 46 | C241T,C913T,C2110T,G3004T,C3037T,C3267T,C5388A,C5986T,T6954C,G7042T,C7765T,C10789T,C14120T,C14408T,C14676T,G14857T,C15279T,G15672C,C15810T,T16176C,G20679T,T2219T,C,G22567T,A23063T,C23271A,A23403G,C23604A,C23709T,T24506G,G24914C,C25731T,C26110T,G26506T,C26735T,C27002T,C27972T,G28048T,A28095T,A28111G,G28280C,A28281T,T28282A,A28804G,G28881A,G28882A,G28883C,C28977T              | N:D3L:N:R203K,N:G204R,N:S235F,ORF1a:E913D,ORF1a:T1001,ORF1a:A1708D,ORF1a:I2230T,ORF1a:M2259I,ORF1b:P218L,ORF1b:P314L,ORF1b:V464F,ORF1b:E735D,ORF3a:P240S,ORF8:Q27*,ORF8:R52I,ORF8:K68*,ORF8:Y73C,S:L335F,S:N501Y,S:A570D,S:D614G,S:P681H,S:T716I,S:S982A,S:D1118H             | 26 | 152  |
| hCoV-19/Mexico/YUC-INMEGEN-06-02-165/2021 | EPI_ISL_2692681 | B.1.1.7 | GRY | 46 | C241T,C913T,C2110T,G3004T,C3037T,C3267T,C5388A,C5986T,T6954C,G7042T,C7765T,C10789T,C14120T,C14408T,C14676T,G14857T,C15279T,G15672C,C15810T,T16176C,G20679T,T2219T,C,G22567T,A23063T,C23271A,A23403G,C23604A,C23709T,T24506G,G24914C,C25731T,C26110T,G26506T,C26735T,C27002T,C27972T,G28048T,A28095T,A28111G,G28280C,A28281T,T28282A,A28804G,G28881A,G28882A,G28883C,C28977T              | N:D3L:N:R203K,N:G204R,N:S235F,ORF1a:E913D,ORF1a:T1001,ORF1a:A1708D,ORF1a:I2230T,ORF1a:M2259I,ORF1b:P218L,ORF1b:P314L,ORF1b:V464F,ORF1b:E735D,ORF3a:P240S,ORF8:Q27*,ORF8:R52I,ORF8:K68*,ORF8:Y73C,S:L335F,S:N501Y,S:A570D,S:D614G,S:P681H,S:T716I,S:S982A,S:D1118H             | 26 | 18   |
| hCoV-19/Mexico/YUC-INMEGEN-06-02-168/2021 | EPI_ISL_2692684 | B.1.1.7 | GRY | 46 | C203T,C241T,C913T,C2110T,G3004T,C3037T,C3267T,C3992T,C5388A,C5986T,T6954C,G7042T,C7765T,C10789T,C14120T,C14408T,C14676T,G14857T,C15279T,G15672C,C15810T,T16176C,G20679T,T2219T,C,G22567T,A23063T,C23271A,A23403G,C23604A,C23709T,T24506G,G24914C,C25731T,C26110T,G26506T,C26735T,C27002T,C27972T,G28048T,A28095T,A28111G,G28280C,A28281T,T28282A,A28804G,G28881A,G28882A,G28883C,C28977T | N:D3L:N:R203K,N:G204R,N:S235F,ORF1a:E913D,ORF1a:T1001,ORF1a:A1708D,ORF1a:I2230T,ORF1a:M2259I,ORF1b:P218L,ORF1b:P314L,ORF1b:V464F,ORF1b:E735D,ORF3a:P240S,ORF8:Q27*,ORF8:R52I,ORF8:K68*,ORF8:Y73C,S:L335F,S:N501Y,S:A570D,S:D614G,S:P681H,S:T716I,S:S982A,S:D1118H             | 26 | 0    |
| hCoV-19/Mexico/YUC-INMEGEN-06-02-18/2021  | EPI_ISL_2692555 | B.1.1.7 | GRY | 48 | C241T,C913T,C2110T,G3004T,C3037T,C3267T,C5388A,C5986T,T6954C,G7042T,C7765T,C10789T,C14120T,C14408T,C14676T,G14857T,C15279T,G15672C,C15810T,T16176C,G19300T,G20679T,T2219T,C,G22567T,A23063T,C23271A,A23403G,C23604A,C23709T,T24506G,G24914C,C25731T,C26110T,G26506T,C26735T,C27002T,C27972T,G28048T,A28095T,A28111G,G28280C,A28281T,T28282A,A28804G,G28881A,G28882A,G28883C,C28977T      | N:D3L:N:R203K,N:G204R,N:S235F,ORF1a:E913D,ORF1a:T1001,ORF1a:A1708D,ORF1a:I2230T,ORF1a:M2259I,ORF1b:P218L,ORF1b:P314L,ORF1b:V464F,ORF1b:E735D,ORF1b:V194S,ORF3a:P240S,ORF8:Q27*,ORF8:R52I,ORF8:K68*,ORF8:Y73C,S:L335F,S:N501Y,S:A570D,S:D614G,S:P681H,S:T716I,S:S982A,S:D1118H | 26 | 19   |
| hCoV-19/Mexico/YUC-INMEGEN-06-02-184/2021 | EPI_ISL_2692697 | B.1.1.7 | GRY | 49 | OC,A28281T,T28282A,A28804G,G28881A,G28882A,G28883C,C28977T                                                                                                                                                                                                                                                                                                                               | N:D3L:N:R203K,N:G204P,N:S235F,ORF1a:T1001,ORF1a:A1708D,ORF1a:I2230T,ORF1b:P314L,ORF8:V13A,ORF8:Q27*,ORF8:R52I,ORF8:K68*,ORF8:Y73C,S:N501Y,S:A570D,S:D614G,S:P681H,S:T716I,S:S982A,S:D1118H                                                                                    | 27 | 31   |
| hCoV-19/Mexico/YUC-INMEGEN-06-02-333/2021 | EPI_ISL_2692817 | B.1.1.7 | GRY | 37 | 282A,G28881A,G28882A,G28883C,C28977T                                                                                                                                                                                                                                                                                                                                                     | M:C86F,N:D3L:N:R203K,N:G204P,N:S235F,ORF1a:A1708D,ORF1a:I2230T,ORF1a:A2345V,ORF1a:A3945V,ORF1b:P314L,ORF1b:V464F,ORF1b:E735D,ORF3a:P240S,ORF8:Q27*,ORF8:R52I,ORF8:K68*,ORF8:Y73C,S:N501Y,S:A570D,S:D614G,S:P681H,S:T716I,S:S982A,S:D1118H                                     | 21 | 0    |
| hCoV-19/Mexico/YUC-INMEGEN-06-02-334/2021 | EPI_ISL_2692818 | B.1.1.7 | G   | 38 | G28280C,A28281T,T28282A,A28877T,C28977T                                                                                                                                                                                                                                                                                                                                                  | N:D3L:N:N8D,N:R203K,N:G204R,N:S235F,ORF1a:L730F,ORF1a:T1001,ORF1a:A1708D,ORF1a:I2230T,ORF1a:L3116F,ORF1b:P314L,ORF3a:L73F,ORF8:Q27*,ORF8:R52I,ORF8:Y73C,S:S98F,S:D138H,S:N501Y,S:A570D,S:D614G,S:P681H,S:T716I,S:S982A,S:D1118H                                               | 24 | 153  |
| hCoV-19/Mexico/YUC-INMEGEN-06-02-35/2021  | EPI_ISL_2692570 | B.1.1.7 | GRY | 37 | A28295G,G28881A,G28882A,G28883C,C28977T                                                                                                                                                                                                                                                                                                                                                  |                                                                                                                                                                                                                                                                               | 6  | 0    |

|                                           |                 |         |     |    |                                                                                                                                                                                                                                                                                                                                                                                                                                                                                                                                                                                                        |                                                                                                                                                                                                                                                                                |    |      |
|-------------------------------------------|-----------------|---------|-----|----|--------------------------------------------------------------------------------------------------------------------------------------------------------------------------------------------------------------------------------------------------------------------------------------------------------------------------------------------------------------------------------------------------------------------------------------------------------------------------------------------------------------------------------------------------------------------------------------------------------|--------------------------------------------------------------------------------------------------------------------------------------------------------------------------------------------------------------------------------------------------------------------------------|----|------|
| hCoV-19/Mexico/YUC-INMEGEN-06-02-39/2021  | EPI_ISL_2692574 | B.1.1.7 | G   | 35 | C241T,C913T,C2469T,C3037T,C3267T,T4966C,C5388A,C5986T,T6954C,C7299T,C7945T,C12099T,C14184T,C14408T,C14676T,T15096C,C15279T,T16176C,A23063T,C23271A,A23403G,C23604A,C23709T,G2410C,T24506G,G24914C,C27972T,G28048T,A28095T,A28111G,G28280C,A28281T,T28282A,C28977T,C29722T                                                                                                                                                                                                                                                                                                                              | N:D3L:N:S235F,ORF1a:A735V,ORF1a:T1001,ORF1a:A1708D,ORF1a:I2230T,ORF1a:A2345V,ORF1a:A3945V,ORF1b:P314L,ORF8:Q27*,ORF8:R52I,ORF8:K68*,ORF8:Y73C,S:N501Y,S:A570D,S:D614G,S:P681H,S:T716I,S:S982A,S:D1118H                                                                         | 6  | 9    |
| hCoV-19/Mexico/YUC-INMEGEN-06-02-65/2021  | EPI_ISL_2692597 | B.1.1.7 | GRY | 48 | C203T,C241T,C913T,C2110T,G3004T,C3037T,C3267T,C3992T,C5388A,C5986T,T6954C,G7042T,C7765T,C10789T,C14120T,C14408T,C14676T,G14857T,C15279T,G15672C,C15810T,T16176C,G20679T,T22219C,G22567T,A23063T,C23271A,A23403G,C23604A,C23709T,T24506G,G24914C,C25731T,C26110T,C26735T,C27002T,C27972T,G28048T,A28095T,A28111G,G28280C,A28281T,T28282A,A28804G,G28881A,G28882A,G28883C,C28977T                                                                                                                                                                                                                        | N:D3L:N:R203K,N:G204R,N:S235F,ORF1a:E913D,ORF1a:T1001,ORF1a:A1708D,ORF1a:I2230T,ORF1a:M2259I,ORF1b:P218L,ORF1b:P314L,ORF1b:V464F,ORF1b:E735D,ORF3a:P240S,ORF8:Q27*,ORF8:R52I,ORF8:K68*,ORF8:H73C,S:L333F,S:N501Y,S:A570D,S:D614G,S:P681H,S:T716I,S:S982A,S:D1118H              | 6  | 219  |
| hCoV-19/Mexico/YUC-INMEGEN-06-02-67/2021  | EPI_ISL_2692599 | B.1.1.7 | GRY | 47 | 2A,A28804G,G28881A,G28882A,G28883C,C28977T                                                                                                                                                                                                                                                                                                                                                                                                                                                                                                                                                             | N:D3L:N:R203K,N:G204R,N:S235F,ORF1a:E913D,ORF1a:T1001,ORF1a:A1708D,ORF1a:I2230T,ORF1a:M2259I,ORF1b:P218L,ORF1b:P314L,ORF1b:V464F,ORF1b:E735D,ORF3a:P240S,ORF8:Q27*,ORF8:R52I,ORF8:K68*,ORF8:H73C,S:L333F,S:N501Y,S:A570D,S:D614G,S:P681H,S:T716I,S:S982A,S:D1118H              | 6  | 655  |
| hCoV-19/Mexico/YUC-INMEGEN-06-02-88/2021  | EPI_ISL_2692618 | B.1.1.7 | GRY | 45 | C241T,C913T,C2110T,G3004T,C3037T,C3267T,C5388A,C5986T,T6954C,G7042T,C7765T,C10789T,C14120T,C14408T,C14676T,G14857T,C15279T,G15672C,C15810T,T16176C,G20679T,T22219C,G22567T,A23063T,C23271A,A23403G,C23604A,C23709T,T24506G,G24914C,C25731T,C26110T,C26735T,C27002T,C27972T,G28048T,A28095T,A28111G,G28280C,A28281T,T28282A,A28804G,G28881A,G28882A,G28883C,C28977T                                                                                                                                                                                                                                     | N:D3L:N:R203K,N:G204R,N:S235F,ORF1a:E913D,ORF1a:T1001,ORF1a:A1708D,ORF1a:I2230T,ORF1a:M2259I,ORF1b:P218L,ORF1b:P314L,ORF1b:V464F,ORF1b:E735D,ORF3a:P240S,ORF8:Q27*,ORF8:R52I,ORF8:K68*,ORF8:H73C,S:L333F,S:N501Y,S:A570D,S:D614G,S:P681H,S:T716I,S:S982A,S:D1118H              | 6  | 613  |
| hCoV-19/Mexico/YUC-INMEGEN-06-02-92/2021  | EPI_ISL_2692547 | B.1.1.7 | GRY | 39 | C241T,C913T,C2110T,C3037T,C3267T,C5388A,C5986T,T6954C,G7042T,A10195G,C10279T,C14120T,C14408T,C14676T,C15279T,T16176C,C16887T,G17427T,A23063T,C23271A,A23403G,C23604A,C23709T,T24506G,G24914C,A27943G,C27972T,G28048T,G28075T,A28095T,A28111G,G28280C,A28281T,T28282A,G28881A,G28882A,G28883C,C28977T                                                                                                                                                                                                                                                                                                   | N:D3L:N:R203K,N:G204R,N:S235F,ORF1a:E913D,ORF1a:T1001,ORF1a:A1708D,ORF1a:I2230T,ORF1a:M2259I,ORF1b:P218L,ORF1b:P314L,ORF1b:V464F,ORF1b:E735D,ORF3a:P240S,ORF8:Q27*,ORF8:R52I,ORF8:K68*,ORF8:H73C,S:L333F,S:N501Y,S:A570D,S:D614G,S:P681H,S:T716I,S:S982A,S:D1118H              | 6  | 0    |
| hCoV-19/Mexico/YUC-INMEGEN-06-04-289/2021 | EPI_ISL_2894336 | B.1.1.7 | GRY | 28 | C203T,C241T,C913T,G1820A,C3037T,C3267T,G5023T,C5388A,G5924A,C5986T,T6954C,G9526T,A12162G,C14408T,C14676T,C15279T,C15720T,T16176C,A17615G,T19363C,A21137G,A23063T,C23248T,C23271A,A23403G,C23604A,C23709T,T24506G,G24914C,G25135T,C27972T,G28048T,A28111G,G28280C,A28281T,T28282A,G28881A,G28882A,G28883C,C28977T                                                                                                                                                                                                                                                                                       | N:D3L:N:R203K,N:G204R,N:S235F,ORF1a:A1708D,ORF1a:I2230T,ORF1a:M1586I,ORF1a:A1708D,ORF1a:V1887T,ORF1a:I2230T,ORF1a:M3087T,ORF1a:Q3966G,ORF1b:P314L,ORF1b:K1383R,ORF1b:K2557R,ORF8:Q27*,ORF8:R52I,ORF8:K68*,ORF8:Y73C,S:N501Y,S:A570D,S:D614G,S:P681H,S:T716I,S:S982A,S:D1118H   | 6  | 116  |
| hCoV-19/Mexico/YUC-INMEGEN-06-04-29/2021  | EPI_ISL_2894176 | B.1.1.7 | GRY | 40 | T,A28111G,G28280C,A28281T,T28282A,G28881A,G28882A,G28883C,C28977T                                                                                                                                                                                                                                                                                                                                                                                                                                                                                                                                      | N:D3L:N:R203K,N:G204R,N:S235F,ORF1a:T1001,ORF1a:A1708D,ORF1a:I2230T,ORF1a:M2259I,ORF1b:P218L,ORF1b:P314L,ORF1b:V464F,ORF1b:E735D,ORF3a:P240S,ORF8:Q27*,ORF8:R52I,ORF8:K68*,ORF8:H73C,S:L333F,S:N501Y,S:A570D,S:D614G,S:P681H,S:T716I,S:S982A,S:D1118H                          | 6  | 0    |
| hCoV-19/Mexico/YUC-INMEGEN-06-04-293/2021 | EPI_ISL_2894340 | B.1.1.7 | GRY | 38 | C241T,C913T,C2110T,C3037T,C3267T,C5388A,C5986T,T6954C,G7042T,A10195G,C10279T,C14120T,C14408T,C14676T,C15279T,T16176C,C16887T,G17427T,A23063T,C23271A,A23403G,C23604A,C23709T,T24506G,G24914C,A27943G,C27972T,G28048T,G28075T,A28095T,A28111G,G28280C,A28281T,T28282A,G28881A,G28882A,G28883C,C28977T                                                                                                                                                                                                                                                                                                   | N:D3L:N:R203K,N:G204R,N:S235F,ORF1a:T1001,ORF1a:A1708D,ORF1a:I2230T,ORF1a:M2259I,ORF1b:P218L,ORF1b:P314L,ORF1b:V464F,ORF1b:E735D,ORF3a:P240S,ORF8:Q27*,ORF8:R52I,ORF8:K68*,ORF8:H73C,S:L333F,S:N501Y,S:A570D,S:D614G,S:P681H,S:T716I,S:S982A,S:D1118H                          | 6  | 157  |
| hCoV-19/Mexico/YUC-INMEGEN-06-04-296/2021 | EPI_ISL_2894343 | B.1.1.7 | GRY | 28 | C241T,C913T,C2110T,G3004T,C3037T,C3267T,C4055T,C5388A,C5986T,T6954C,G7042T,C7765T,C8980T,C10789T,C14120T,C14408T,C14676T,G14857T,C15279T,T16176C,G20208T,T22219C,G22567T,A23063T,C23271A,A23403G,C23604A,C23709T,T24506G,G24914C,C25731T,C26110T,C26735T,C27972T,G28048T,A28095T,A28111G,G28280C,A28281T,T28282A,G28881A,G28882A,G28883C,C28977T                                                                                                                                                                                                                                                       | N:D3L:N:R203K,N:G204R,N:S235F,ORF1a:E913D,ORF1a:T1001,ORF1a:H1264I,ORF1a:A1708D,ORF1a:I2230T,ORF1a:M2259I,ORF1b:P218L,ORF1b:P314L,ORF1b:V464F,ORF1b:E735D,ORF3a:P240S,ORF8:Q27*,ORF8:R52I,ORF8:K68*,ORF8:H73C,S:L333F,S:N501Y,S:A570D,S:D614G,S:P681H,S:T716I,S:S982A,S:D1118H | 6  | 0    |
| hCoV-19/Mexico/YUC-INMEGEN-06-04-299/2021 | EPI_ISL_2894346 | B.1.1.7 | GRY | 45 | C241T,C913T,C2110T,C3037T,C3267T,C5388A,C5986T,T6954C,G7042T,A10195G,C10279T,C14120T,C14408T,C14676T,C15279T,T16176C,C16887T,G17427T,A23063T,C23271A,A23403G,C23604A,C23709T,T24506G,G24914C,A27943G,C27972T,G28048T,G28075T,A28095T,A28111G,G28280C,A28281T,T28282A,G28881A,G28882A,G28883C,C28977T                                                                                                                                                                                                                                                                                                   | N:D3L:N:R203K,N:G204R,N:S235F,ORF1a:T1001,ORF1a:A1708D,ORF1a:I2230T,ORF1a:M2259I,ORF1b:P218L,ORF1b:P314L,ORF1b:V464F,ORF1b:E735D,ORF3a:P240S,ORF8:Q27*,ORF8:R52I,ORF8:K68*,ORF8:H73C,S:L333F,S:N501Y,S:A570D,S:D614G,S:P681H,S:T716I,S:S982A,S:D1118H                          | 6  | 0    |
| hCoV-19/Mexico/YUC-INMEGEN-06-04-308/2021 | EPI_ISL_2894355 | B.1.1.7 | GRY | 38 | C241T,C913T,C2110T,G3004T,C3037T,C3267T,C5388A,C5986T,T6954C,G7042T,C7765T,C10789T,C14120T,C14408T,C14676T,G14857T,C15279T,T16176C,C18555T,A19838C,G22567T,C23271A,A23403G,C23604A,C23709T,T24506G,G24914C,C25731T,C26110T,C26735T,C27972T,G28048T,A28095T,A28111G,G28280C,A28281T,T28282A,A28804G,G28881A,G28882A,G28883C,C28977T                                                                                                                                                                                                                                                                     | N:D3L:N:R203K,N:G204R,N:S235F,ORF1a:E913D,ORF1a:T1001,ORF1a:A1708D,ORF1a:I2230T,ORF1a:M2259I,ORF1b:P218L,ORF1b:P314L,ORF1b:V464F,ORF1b:E735D,ORF3a:P240S,ORF8:Q27*,ORF8:R52I,ORF8:K68*,ORF8:H73C,S:L333F,S:N501Y,S:A570D,S:D614G,S:P681H,S:T716I,S:S982A,S:D1118H              | 6  | 262  |
| hCoV-19/Mexico/YUC-INMEGEN-06-04-338/2021 | EPI_ISL_2894382 | B.1.1.7 | GRY | 44 | C27972T,G28048T,A28095T,A28111G,G28280C,A28281T,T28282A,A28804G,G28881A,G28882A,C241T,C913T,C2110T,C3037T,C3267T,C5388A,C5986T,T6954C,G7042T,A10195G,C10279T,C14120T,C14408T,C14676T,C15279T,T16176C,C16887T,G17427T,A23063T,C23271A,A23403G,C23604A,C23709T,T24506G,G24914C,A27943G,C27972T,G28048T,G28075T,A28095T,A28111G,G28280C,A28281T,T28282A,G28881A,G28882A,G28883C,C28977T                                                                                                                                                                                                                   | N:D3L:N:R203K,N:G204R,N:S235F,ORF1a:E913D,ORF1a:T1001,ORF1a:H1264I,ORF1a:A1708D,ORF1a:I2230T,ORF1a:M2259I,ORF1b:P218L,ORF1b:P314L,ORF1b:V464F,ORF1b:E735D,ORF3a:P240S,ORF8:Q27*,ORF8:R52I,ORF8:K68*,ORF8:H73C,S:L333F,S:N501Y,S:A570D,S:D614G,S:P681H,S:T716I,S:S982A,S:D1118H | 6  | 0    |
| hCoV-19/Mexico/YUC-INMEGEN-06-04-345/2021 | EPI_ISL_2894389 | B.1.1.7 | GRY | 28 | C241T,C913T,C2110T,G3004T,C3037T,C3267T,C5388A,C5986T,T6954C,G7042T,A10195G,C10279T,C14120T,C14408T,C14676T,C15279T,T16176C,C16887T,G17427T,A23063T,C23271A,A23403G,C23604A,C23709T,T24506G,G24914C,A27943G,C27972T,G28048T,G28075T,A28095T,A28111G,G28280C,A28281T,T28282A,G28881A,G28882A,G28883C,C28977T                                                                                                                                                                                                                                                                                            | N:D3L:N:R203K,N:G204R,N:S235F,ORF1a:T1001,ORF1a:A1708D,ORF1a:I2230T,ORF1a:M2259I,ORF1b:P218L,ORF1b:P314L,ORF1b:V464F,ORF1b:E735D,ORF3a:P240S,ORF8:Q27*,ORF8:R52I,ORF8:K68*,ORF8:H73C,S:L333F,S:N501Y,S:A570D,S:D614G,S:P681H,S:T716I,S:S982A,S:D1118H                          | 6  | 0    |
| hCoV-19/Mexico/YUC-INMEGEN-06-04-348/2021 | EPI_ISL_2894392 | B.1.1.7 | GRY | 38 | C241T,C913T,C2110T,C3037T,C3267T,C5388A,C5986T,T6954C,G7042T,A10195G,C10279T,C14120T,C14408T,C14676T,C15279T,T16176C,C16887T,G17427T,A23063T,C23271A,A23403G,C23604A,C23709T,T24506G,G24914C,A27943G,C27972T,G28048T,G28075T,A28095T,A28111G,G28280C,A28281T,T28282A,G28881A,G28882A,G28883C,C28977T                                                                                                                                                                                                                                                                                                   | N:D3L:N:R203K,N:G204R,N:S235F,ORF1a:T1001,ORF1a:A1708D,ORF1a:I2230T,ORF1a:M2259I,ORF1b:P218L,ORF1b:P314L,ORF1b:V464F,ORF1b:E735D,ORF3a:P240S,ORF8:Q27*,ORF8:R52I,ORF8:K68*,ORF8:H73C,S:L333F,S:N501Y,S:A570D,S:D614G,S:P681H,S:T716I,S:S982A,S:D1118H                          | 6  | 0    |
| hCoV-19/Mexico/YUC-INMEGEN-06-04-349/2021 | EPI_ISL_2894393 | B.1.1.7 | GRY | 38 | 280C,A28281T,T28282A,G28881A,G28882A,G28883C,C28977T                                                                                                                                                                                                                                                                                                                                                                                                                                                                                                                                                   | N:D3L:N:R203K,N:G204R,N:S235F,ORF1a:E913D,ORF1a:T1001,ORF1a:A1708D,ORF1a:I2230T,ORF1a:M2259I,ORF1b:P218L,ORF1b:P314L,ORF1b:V464F,ORF1b:E735D,ORF3a:P240S,ORF8:Q27*,ORF8:R52I,ORF8:K68*,ORF8:H73C,S:L333F,S:N501Y,S:A570D,S:D614G,S:P681H,S:T716I,S:S982A,S:D1118H              | 6  | 0    |
| hCoV-19/Mexico/YUC-INMEGEN-06-04-43/2021  | EPI_ISL_2894187 | B.1.1.7 | GR  | 43 | C241T,C913T,C2110T,G3004T,C3037T,C3267T,C4099T,C5388A,C5986T,T6954C,G7042T,G8846A,C10789T,C14120T,C14408T,C14676T,G14857T,C15279T,T16176C,C18555T,A19838C,G22567T,C23271A,A23403G,C23604A,C23709T,T24506G,G24914C,C26110T,C26735T,C27625T,C27972T,G28048T,A28095T,A28111G,G28280C,A28281T,T28282A,A28804G,G28881A,G28882A,G28883C,C241T,C913T,C2453T,C3037T,C3267T,C5388A,C5986T,T6954C,C9611T,C14408T,C14676T,C15279T,T16176C,G18651T,C21855T,G21974C,C23271A,A23403G,C23410T,C23604A,C23709T,T24506G,G24914C,C27972T,G28048T,A28111G,G28280C,A28281T,T28282A,A28295G,G28881A,G28882A,G28883C,C28977T | N:D3L:N:N8D,N:R203K,N:G204R,N:S235F,ORF1a:L730F,ORF1a:T1001,ORF1a:A1708D,ORF1a:I2230T,ORF1a:L316F,ORF1b:P314L,ORF1b:E1728D,ORF8:Q27*,ORF8:R52I,ORF8:Y73C,S:S98F,S:D138H,S:A570D,S:D614G,S:P681H,S:T716I,S:S982A,S:D1118H                                                       | 10 | 684  |
| hCoV-19/Mexico/YUC-INMEGEN-06-04-59/2021  | EPI_ISL_2894203 | B.1.1.7 | GR  | 34 | 8882A,G28883C,C28977T                                                                                                                                                                                                                                                                                                                                                                                                                                                                                                                                                                                  | N:D3L:N:R203K,N:G204R,N:S235F,ORF1a:E913D,ORF1a:T1001,ORF1a:A1708D,ORF1a:I2230T,ORF1a:M2259I,ORF1b:P218L,ORF1b:P314L,ORF1b:V464F,ORF1b:E735D,ORF3a:P240S,ORF8:Q27*,ORF8:R52I,ORF8:K68*,ORF8:H73C,S:L333F,S:N501Y,S:A570D,S:D614G,S:P681H,S:T716I,S:S982A,S:D1118H              | 6  | 1420 |

|                                             |                 |         |     |                                                                                                                                                                                                                                                                                                                                                                                                                                                                                                                                                                                                                                                                                                                                                                            |                                                                                                                                                                                                                                                              |    |                                                                                |      |
|---------------------------------------------|-----------------|---------|-----|----------------------------------------------------------------------------------------------------------------------------------------------------------------------------------------------------------------------------------------------------------------------------------------------------------------------------------------------------------------------------------------------------------------------------------------------------------------------------------------------------------------------------------------------------------------------------------------------------------------------------------------------------------------------------------------------------------------------------------------------------------------------------|--------------------------------------------------------------------------------------------------------------------------------------------------------------------------------------------------------------------------------------------------------------|----|--------------------------------------------------------------------------------|------|
| hCoV-19/Mexico/YUC-INMEGEN-06-04-75/2021    | EPI_ISL_2894219 | B.1.1.7 | GR  | 280C,A28281T,T28282A,G28881A,G28882A,G28883C,C28977T                                                                                                                                                                                                                                                                                                                                                                                                                                                                                                                                                                                                                                                                                                                       | N:D3L:N:R203K,N:G204R,N:S235F,ORF1a:T1001,ORF1a:A1708D,ORF1a:I2230 T,ORF1a:M2259I,ORF1b:P218L,ORF1b:P314L,ORF8:H17R,ORF8:Q27*,ORF8:R 52I,ORF8:C61F,ORF8:Y73C,ORF8:Y73C,S598F,S,D614G,S,P681H,S,T716I,S59                                                     | 22 | 82A,S,D1118H                                                                   | 414  |
| hCoV-19/Mexico/YUC-INMEGEN-06-04-84/2021    | EPI_ISL_2894227 | B.1.1.7 | GRY | 241T,C254T,C913T,C2453T,C3037T,C3267T,C5388A,C5986T,T6954C,G9611T,C14408T,C14676T ,C15279T,T16176C,T18099C,C21855T,G21974C,A23063T,C23271A,A23403G,C23604A,C23709T ,C23991T,T24506G,G24914C,C25609T,C27128T,C27972T,G28048T,A28111G,G28280C,A28281 T,T28282A,A28295G,G28337T,G28881A,G28882A,G28883C,C28977T                                                                                                                                                                                                                                                                                                                                                                                                                                                               | N:D3L:N:R203K,N:G204R,N:S235F,ORF1a:I2230,ORF1a:L3116F,ORF1b:P314L,ORF3a:L73F,ORF8 :Q27*,ORF8:R52I,ORF8:Y73C,ORF8:Y73C,S598F,S,D138H,S,N501Y,S5A570D,S 5D614G,S,P681H,S,T716I,S5810I,S5982A,S,D1118H                                                         | 27 | S,D614G,S,P681H,S,T716I,S5810I,S5982A,S,D1118H                                 | 181  |
| hCoV-19/Mexico/YUC-INMEGEN-16-301/2021      | EPI_ISL_2978611 | B.1.1.7 | GR  | 241T,C913T,C2110T,C3037T,C3267T,C5388A,C5986T,T6954C,G7042T,A10195G,C10279T,C141 20T,C14408T,C14676T,C15279T,T16176C,C16887T,G17427T,C23271A,A23403G,C23604A,C237 09T,T24506G,G24914C,A27943G,C27972T,G28048T,G28075T,A28111G,G28280C,A28281T,T28 28A,G28881A,G28882A,G28883C,C28977T                                                                                                                                                                                                                                                                                                                                                                                                                                                                                      | N:D3L:N:R203K,N:G204R,N:S235F,ORF1a:T1001,ORF1a:A1708D,ORF1a:I2230 T,ORF1a:M2259I,ORF1b:P218L,ORF1b:P314L,ORF8:H17R,ORF8:Q27*,ORF8:R 52I,ORF8:C61F,ORF8:Y73C,S5A570D,S,D614G,S,P681H,S,T716I,S5982A,S,D11                                                    | 21 | 18H                                                                            | 416  |
| hCoV-19/Mexico/YUC-INMEGEN-16-333/2021      | EPI_ISL_2978638 | B.1.1.7 | GR  | 241T,C913T,C2110T,C3037T,C3267T,C5388A,C5986T,T6954C,G7042T,A10195G,C10279T,C141 20T,C14408T,C14676T,C15279T,T16176C,G17427T,C23271A,A23403G,C23604A,C23709T,T245 06G,G24914C,A27943G,C27972T,G28048T,G28075T,A28111G,G28280C,A28281T,T28282A,G2 8881A,G28882A,G28883C,C28977T                                                                                                                                                                                                                                                                                                                                                                                                                                                                                             | N:D3L:N:R203K,N:G204R,N:S235F,ORF1a:T1001,ORF1a:A1708D,ORF1a:I2230 T,ORF1a:M2259I,ORF1b:P218L,ORF1b:P314L,ORF8:H17R,ORF8:Q27*,ORF8:R 52I,ORF8:C61F,ORF8:Y73C,S5A570D,S,D614G,S,P681H,S,T716I,S5982A,S,D11                                                    | 21 | 18H                                                                            | 2700 |
| hCoV-19/Mexico/YUC-INMEGEN-16-340/2021      | EPI_ISL_2978645 | B.1.1.7 | GR  | 241T,C913T,C2453T,C3037T,C3267T,C5388A,C5986T,T6954C,G9611T,C14408T,C14676T ,C15279T,T16176C,T18099C,C21855T,G21974C,C23271A,A23403G,C23604A,C23709T,T24506 G,G24914C,C25609T,A27449G,C27972T,G28048T,A28111G,G28280C,A28281T,T28282A,A2829 5G,G28881A,G28882A,G28883C,C28977T                                                                                                                                                                                                                                                                                                                                                                                                                                                                                             | N:D3L:N:R203K,N:G204R,N:S235F,ORF1a:I2230,ORF1a:L3116F,ORF1b:P314L,ORF3a:L73F,ORF8 :Q27*,ORF8:R52I,ORF8:Y73C,S598F,S,D138H,S,N501Y,S5A570D,S,D614G,S,P681                                                                                                    | 24 | S,H,T716I,S5982A,S,D1118H                                                      | 3046 |
| hCoV-19/Mexico/YUC-INMEGEN-16-352/2021      | EPI_ISL_2978656 | B.1.1.7 | GRY | 241T,C913T,C2453T,C3037T,C3267T,C5388A,C5986T,T6954C,G7042T,C7765T,C8980T,C10789T,C14120T,C14408T,C14676T,C14857T,C15279T,T16176C,G20208T,C21736T,T2 219C,G22567T,A23063T,C23271A,A23403G,C23604A,C23709T,T24506G,G24914C,C25731T,C 26110T,C26735T,C27972T,G28048T,A28111G,G28280C,A28281T,T28282A,A28804G,G28881A ,C241T,C913T,C2469T,C3037T,C3267T,T4966C,C5388A,C5986T,T6954C,C27972T,C7945T,C12099T ,C14184T,C14408T,C14676T,T15096C,C15279T,T16176C,A23063T,C23271A,A23403G,C23604A ,C23709T,G24140C,T24506G,G24914C,C27972T,G28048T,A28095T,A28111G,G28280C,A28281 T,T28282A,A28777T,C28977T,C29722T                                                                                                                                                                 | N:D3L:N:R203K,N:G204R,N:S235F,ORF1a:I2230,ORF1a:L3116F,ORF1b:P314L,ORF1b:V464F,ORF1b:V464F,ORF1b:Q2247H,ORF3a:P240S,ORF8:Q27*,ORF8:R52I,ORF8:Y73C, S5A570D,S,D614G,S,P681H,S,T716I,S5982A,S,D1118H                                                           | 26 | S,L335F,S,N501Y,S5A570D,S,D614G,S,P681H,S,T716I,S5982A,S,D1118H                | 0    |
| hCoV-19/Mexico/YUC-INMEGEN-16-357/2021      | EPI_ISL_2978661 | B.1.1.7 | GRY | 241T,C913T,C2453T,C3037T,C3267T,C5388A,C5986T,T6954C,G9611T,C14408T,C14676T ,C15279T,T16176C,G21255C,C21855T,G21974C,A23063T,C23271A,A23403G,C23533T,C23604A,C23 709T,T24506G,G24914C,C27513T,C27972T,G28048T,A28111G,G28280C,A28281T,T28282A,A2 8295G,G28881A,G28882A,G28883C,C28977T                                                                                                                                                                                                                                                                                                                                                                                                                                                                                     | N:D3L:N:R203K,N:G204R,N:S235F,ORF1a:A1708D,ORF1a:I2230,ORF1a:A3945V,ORF1b:P314L,ORF8:Q27*,ORF8:R52I,ORF8:K68*, ORF8:Y73C,S,N501Y,S5A570D,S,D614G,S,P681H,S,T716I,S5V680I,S5982A,S,D1                                                                         | 21 | 118H                                                                           | 6    |
| hCoV-19/Mexico/YUC-NYGC-1163-SM/2021        | EPI_ISL_3023819 | B.1.1.7 | GRY | 241T,C913T,C2453T,C3037T,C3267T,C5388A,C5986T,T6954C,G9611T,C14408T,C14676T,C152 79T,T16176C,G21255C,C21855T,G21974C,A23063T,C23271A,A23403G,C23533T,C23604A,C23 709T,T24506G,G24914C,C27513T,C27972T,G28048T,A28111G,G28280C,A28281T,T28282A,A2 8295G,G28881A,G28882A,G28883C,C28977T                                                                                                                                                                                                                                                                                                                                                                                                                                                                                     | N:D3L:N:R203K,N:G204R,N:S235F,ORF1a:I2230,ORF1a:L3116F,ORF1b:P314L,ORF8:Q27*,ORF8:R52I,O R8:Y73C,S598F,S,D138H,S,N501Y,S5A570D,S,D614G,S,P681H,S,T716I,S5982 A,S,D1118H                                                                                      | 23 | S,D1118H                                                                       | 0    |
| hCoV-19/Mexico/YUC-NYGC-1206-SM/2021        | EPI_ISL_3023815 | B.1.1.7 | GRY | 241T,C913T,C2453T,C3037T,C3267T,C5388A,C5986T,T6523C,T6954C,G9611T,C14408T,C1467 6T,C15279T,T16176C,C21855T,G21974C,A23063T,C23271A,A23403G,C23604A,C23709T,T2450 6G,G24914C,C27972T,G28048T,A28111G,G28280C,A28281T,T28282A,A28295G,G28881A,G28 81A,G28 241T,C913T,C2453T,C3037T,C3267T,C5388A,C5986T,T6954C,G9611T,C14408T,C14676T,C152 79T,T16176C,C18115T,C21855T,G21974C,A23063T,C23271A,A23403G,C23604A,C23709T,T245 06G,G24914C,C27972T,G28048T,A28111G,G28280C,A28281T,T28282A,A28295G,C28348T,G2                                                                                                                                                                                                                                                                  | N:D3L:N:R203K,N:G204R,N:S235F,ORF1a:I2230,ORF1a:L3116F,ORF1b:P314L,ORF8:Q27*,ORF8:R52I,O R8:Y73C,S598F,S,D138H,S,N501Y,S5A570D,S,D614G,S,P681H,S,T716I,S5982 A,S,D1118H                                                                                      | 25 | 14G,S,P681H,S,T716I,S5982A,S,D1118H                                            | 0    |
| hCoV-19/Mexico/YUC-NYGC-1211-SM/2021        | EPI_ISL_3023983 | B.1.1.7 | GRY | 241T,C913T,C2453T,C3037T,C3267T,C5388A,C5986T,T6523C,T6954C,G9611T,C14408T,C1467 6T,C15279T,T16176C,C21855T,G21974C,A23063T,C23271A,A23403G,C23604A,C23709T,T2450 6G,G24914C,C27972T,G28048T,A28111G,G28280C,A28281T,T28282A,A28295G,G28881A,G28 81A,G28 241T,C913T,C2453T,C3037T,C3267T,C5388A,C5986T,T6523C,T6954C,G9611T,C14408T,C1467 6T,C15279T,T16176C,C21855T,G21974C,A23063T,C23271A,A23403G,C23604A,C23709T,T2450 6G,G24914C,C27972T,G28048T,A28111G,G28280C,A28281T,T28282A,A28295G,G28881A,G28 81A,G28 241T,C913T,C2453T,C3037T,C3267T,C5388A,C5986T,T6523C,T6954C,G9611T,C14408T,C1467 6T,C15279T,T16176C,C21855T,G21974C,A23063T,C23271A,A23403G,C23604A,C23709T,T2450 6G,G24914C,C27972T,G28048T,A28111G,G28280C,A28281T,T28282A,A28295G,G28881A,G28 81A,G28 | N:D3L:N:R203K,N:G204R,N:S235F,ORF1a:I2230,ORF1a:L3116F,ORF1b:P314L,ORF8:Q27*,ORF8:R52I,O R8:Y73C,S598F,S,D138H,S,N501Y,S5A570D,S,D614G,S,P681H,S,T716I,S5982 A,S,D1118H                                                                                      | 25 | 14G,S,P681H,S,T716I,S5982A,S,D1118H                                            | 0    |
| hCoV-19/Mexico/YUC-NYGC-1225-SM/2021        | EPI_ISL_3023816 | B.1.1.7 | GRY | 241T,C913T,C2453T,C3037T,C3267T,C5388A,C5986T,T6523C,T6954C,G9611T,C14408T,C1467 6T,C15279T,T16176C,C21855T,G21974C,A23063T,C23271A,A23403G,C23604A,C23709T,T2450 6G,G24914C,C27972T,G28048T,A28111G,G28280C,A28281T,T28282A,A28295G,G28881A,G28 81A,G28 241T,C913T,C2453T,C3037T,C3267T,C5388A,C5986T,T6523C,T6954C,G9611T,C14408T,C1467 6T,C15279T,T16176C,C21855T,G21974C,A23063T,C23271A,A23403G,C23604A,C23709T,T2450 6G,G24914C,C27972T,G28048T,A28111G,G28280C,A28281T,T28282A,A28295G,G28881A,G28 81A,G28                                                                                                                                                                                                                                                          | N:D3L:N:R203K,N:G204R,N:S235F,ORF1a:I2230,ORF1a:L3116F,ORF1b:P314L,ORF8:Q27*,ORF8:R52I,O R8:Y73C,S598F,S,D138H,S,N501Y,S5A570D,S,D614G,S,P681H,S,T716I,S5982 A,S,D1118H                                                                                      | 23 | R8:Y73C,S598F,S,D138H,S,N501Y,S5A570D,S,D614G,S,P681H,S,T716I,S5982 A,S,D1118H | 0    |
| hCoV-19/Mexico/YUC-NYGC-1232-SM/2021        | EPI_ISL_3023948 | B.1.1.7 | GRY | 241T,C913T,C2453T,C3037T,C3267T,C5388A,C5986T,T6523C,T6954C,G9611T,C14408T,C1467 6T,C15279T,T16176C,C21855T,G21974C,A23063T,C23271A,A23403G,C23604A,C23709T,T2450 6G,G24914C,C27972T,G28048T,A28111G,G28280C,A28281T,T28282A,A28295G,G28881A,G28 81A,G28 241T,C913T,C2453T,C3037T,C3267T,C5388A,C5986T,T6523C,T6954C,G9611T,C14408T,C1467 6T,C15279T,T16176C,C21855T,G21974C,A23063T,C23271A,A23403G,C23604A,C23709T,T2450 6G,G24914C,C27972T,G28048T,A28111G,G28280C,A28281T,T28282A,A28295G,G28881A,G28 81A,G28                                                                                                                                                                                                                                                          | N:D3L:N:R203K,N:G204R,N:S235F,ORF1a:I2230,ORF1a:L3116F,ORF1b:P314L,ORF8:Q27*,ORF8:R52I,O R8:Y73C,S598F,S,D138H,S,N501Y,S5A570D,S,D614G,S,P681H,S,T716I,S5982 A,S,D1118H                                                                                      | 23 | R8:Y73C,S598F,S,D138H,S,N501Y,S5A570D,S,D614G,S,P681H,S,T716I,S5982 A,S,D1118H | 0    |
| hCoV-19/Mexico/YUC-NYGC-14211-21/2021       | EPI_ISL_3024031 | B.1.1.7 | GRY | 241T,C913T,C3037T,C3267T,C5388A,C5986T,T6954C,G9693T,C10138T,C11572T,C14408T,C14 676T,C15279T,T16176C,G18651A,T23042C,A23063T,C23271A,A23403G,C23604A,C23709T,T24 506G,G24914C,C25006T,G25218T,C25553T,G26107T,C27615T,C27972T,G28048T,A28095T,A2 8111G,G28280C,A28281T,T28282A,G28881A,G28882A,G28883C,C28977T,C29739T                                                                                                                                                                                                                                                                                                                                                                                                                                                    | N:D3L:N:R203K,N:G204R,N:S235F,ORF1a:I2230,ORF1a:A3143V,ORF1b:P314L,ORF3a:E239*,ORF8:R 52I,ORF8:K68*,ORF8:Y73C,S5494P,S,N501Y,S5A570D,S,D614G,S,P681H,S,T71                                                                                                   | 23 | 1118H,S,G1219V                                                                 | 179  |
| hCoV-19/Mexico/YUC-NYGC-14212-21/2021       | EPI_ISL_3024035 | B.1.1.7 | GRY | 241T,C913T,C3037T,C3267T,C5388A,C5986T,T6954C,G9693T,C10138T,C11572T,C14408T,C14 676T,C15279T,T16176C,G18651A,T23042C,A23063T,C23271A,A23403G,C23604A,C23709T,T24 506G,G24914C,C25006T,G25218T,C25553T,G26107T,C27615T,C27972T,G28048T,A28095T,A2 8111G,G28280C,A28281T,T28282A,G28881A,G28882A,G28883C,C28977T,C29739T                                                                                                                                                                                                                                                                                                                                                                                                                                                    | N:D3L:N:R203K,N:G204R,N:S235F,ORF1a:I2230,ORF1a:A3143V,ORF1b:P314L,ORF3a:E239*,ORF8:R 52I,ORF8:K68*,ORF8:Y73C,S5494P,S,N501Y,S5A570D,S,D614G,S,P681H,S,T71                                                                                                   | 24 | 6I,S5982A,S,D1118H,S,G1219V                                                    | 153  |
| hCoV-19/Mexico/YUC-NYGC-14715-21/2021       | EPI_ISL_3024078 | B.1.1.7 | GRY | 241T,C913T,C3037T,C3267T,C5388A,C5986T,T6954C,G9693T,C10138T,C11572T,C14408T,C14 676T,C15279T,T16176C,C21855T,G21974C,A23063T,C23271A,A23403G,C23604A,C23709T,T2450 6G,G24914C,G25244T,C27972T,G28048T,A28111G,G28280C,A28281T,T28282A,A28295G,C287 20T,G28881A,G28882A,G28883C,C28977T,G29527T                                                                                                                                                                                                                                                                                                                                                                                                                                                                            | N:D3L:N:R203K,N:G204R,N:S235F,ORF1a:I2230,ORF1a:L3116F,ORF1b:P314L,ORF8:Q27*,ORF8:R 52I,ORF8:Y73C,S598F,S,D138H,S,N501Y,S5A570D,S,D614G,S,P681H,S,T716I,S5982A,S,D1118H                                                                                      | 25 | 6I,S5982A,S,D1118H,S,V1228L                                                    | 1062 |
| hCoV-19/Mexico/YUC-NYGC-15751-21/2021       | EPI_ISL_3024024 | B.1.1.7 | GRY | 241T,C913T,C3037T,C3267T,C5388A,C5986T,T6954C,G7042T,C10789T,C1412 0T,C14408T,C14676T,C14857T,C15279T,T16176C,G22567T,A23063T,C23271A,A23403G,C2360 4A,C23709T,T24506G,G24914C,C26110T,C26735T,C27972T,G28048T,A28095T,A28111G,G282 80C,A28281T,T28282A,A28804G,G28881A,G28882A,G28883C,C28977T                                                                                                                                                                                                                                                                                                                                                                                                                                                                            | N:D3L:N:R203K,N:G204R,N:S235F,ORF1a:E913D,ORF1a:T1001,ORF1a:A1708 D,ORF1a:I2230,ORF1a:M2259I,ORF1b:P218L,ORF1b:P314L,ORF1b:V464F,OR F3a:P240S,ORF8:Q27*,ORF8:R52I,ORF8:K68*,ORF8:Y73C,S,L335F,S,N501Y,S                                                      | 25 | 570D,S,D614G,S,P681H,S,T716I,S5982A,S,D1118H                                   | 131  |
| hCoV-19/Mexico/YUC-NYGC-8474-21/2021        | EPI_ISL_3024018 | B.1.1.7 | GRY | 241T,C913T,C3037T,C3267T,C5388A,C5986T,T6954C,G7042T,C10789T,C1412 0T,C14408T,C14676T,C14857T,C15279T,T16176C,A21137G,A23063T,C23271A,A23403G,C23604A,C23709T,T2 4506G,G24914C,G25135T,C27972T,G28048T,A28111G,G28280C,A28281T,T28282A,G28881A, G28882A,G28883C,C28977T                                                                                                                                                                                                                                                                                                                                                                                                                                                                                                    | N:D3L:N:R203K,N:G204R,N:S235F,ORF1a:T1001,ORF1a:A1708D,ORF1a:I2230 T,ORF1a:P314L,ORF1b:P314L,ORF8:K1383R,ORF1b:K2557R,ORF8:Q27*,O R8:R52I,ORF8:Y73C,S,N501Y,S5A570D,S,D614G,S,P681H,S,T716I,S5982A,S,D                                                       | 22 | 1118H,S,K1191N                                                                 | 111  |
| hCoV-19/Mexico/ZAC-IndRE_F10107_S573/2021   | EPI_ISL_1335757 | B.1.1.7 | GRY | 241T,C913T,C3037T,C3267T,C5388A,C5986T,T6954C,C12970T,C13176T,C14408T,C14 676T,C15279T,T16176C,A23063T,C23271A,A23403G,C23604A,C23709T,C24054T,T24 506G,G24914C,C27972T,G28048T,A28111G,G28280C,A28281T,T28282A,G28881A,G28882A,G 241T,C913T,C3037T,C3267T,C5388A,C5986T,T6954C,C12970T,C13176T,C14408T,C14 676T,C15279T,T16176C,C17977T,C18377T,C23063T,C23271A,A23403G,C23604A,C23709T,C2 023T,C24054T,T24506G,G24914C,A25336C,C27046T,C27972T,G28048T,A28111G,G282809T,G2                                                                                                                                                                                                                                                                                               | N:D3L:N:R203K,N:G204R,N:S235F,ORF1a:T1001,ORF1a:A1708D,ORF1a:A203 3T,ORF1a:I2230,ORF1a:T4304I,ORF1b:P314L,ORF8:Q27*,ORF8:R52I,ORF8:Y 73C,S,N501Y,S5A570D,S,D614G,S,P681H,S,T716I,S5831Y,S5982A,S,D1118H                                                      | 21 | 3C,S,N501Y,S5A570D,S,D614G,S,P681H,S,T716I,S5831Y,S5982A,S,D1118H              | 5    |
| hCoV-19/Mexico/ZAC-IndRE_FB16088_S2458/2021 | EPI_ISL_2484166 | B.1.1.7 | GRY | 241T,C913T,C3037T,C3267T,C5388A,C5986T,T6954C,G7042T,C10789T,C1412 0T,C14408T,C14676T,C14857T,C15279T,T16176C,A21137G,A23063T,C23271A,A23403G,C23604A,C23709T,T2 4506G,G24914C,G25135T,C27972T,G28048T,A28111G,G282809T,G28280C,A28281T,T28282A,G28881A,G28882A,G28883C,C28977T                                                                                                                                                                                                                                                                                                                                                                                                                                                                                            | M:T175M,N:D3L:N:R203K,N:G204R,N:S235F,ORF1a:T1001,ORF1a:I2230,OR F1a:A2033T,ORF1a:I2230,ORF1a:T4304I,ORF1b:P314L,ORF1b:L504F,ORF1 b:T1637I,ORF8:Q27*,ORF8:R52I,ORF8:Y73C,ORF8:E106*,S,N501Y,S5A570D,S,D 614G,S,P681H,S,T716I,S5831Y,S5982A,S,D1118H,S,E1258D | 26 | 614G,S,P681H,S,T716I,S5831Y,S5982A,S,D1118H,S,E1258D                           | 0    |



G90A,C241T,C913T,C2453T,C3037T,C3267T,C5388A,C5986T,T6954C,C9611T,C14408T,C14676T,  
C15279T,T16176C,C18115T,G21795T,C21855T,T22469C,A23063T,C23271A,A23403G,C23604A,  
C23709T,T24506G,G24914C,A25336C,G25337C,C27389T,C27972T,G28048T,A28111G,G28280  
41 C\_A28281T,T28282A,A28295G,C28348T,G28881A,G28882A,G28883C,C28977T,C29098T

N:D3L,N:N8D,N:R203K,N:G204R,N:S235F,ORF1a:L730F,ORF1a:T1001I,ORF1a:  
A1708D,ORF1a:J2230T,ORF1a:L3116F,ORF1b:P314L,ORF1b:H1550Y,ORF8:Q2  
7\*,ORF8:R52I,ORF8:Y73C,ORF9b:A22V,S:R78M,S:S98F,S:N501Y,S:A570D,S:D61  
27 4G,S:P681H,S:T716I,S:S982A,S:D1118H,S:E1258D,S:D1259H

**Table S2.** Patient demographic and clinical characteristics of Mexican sequences classified as B.1.1.7 reported as of July 24, 2021. The information of the 473 genome sequences generated by us are shown in blue.

| Virus name                                     | Accession ID    | Collection date | Location                                 | Host  | Additional location information | Gender | Patient age | Patient status | Specimen                               |
|------------------------------------------------|-----------------|-----------------|------------------------------------------|-------|---------------------------------|--------|-------------|----------------|----------------------------------------|
| hCoV-19/Mexico/BCN-IBT_IMSS_2004/2021          | EPI_ISL_2801856 | 04/06/21        | North America / Mexico / Baja California | Human |                                 | Male   | 35          | Ambulatory     | Nasopharyngeal and pharyngeal swabs    |
| hCoV-19/Mexico/BCN-IBT_IMSS_2033/2021          | EPI_ISL_2801878 | 08/06/21        | North America / Mexico / Baja California | Human |                                 | Female | 29          | Ambulatory     | Nasopharyngeal and pharyngeal swabs    |
| hCoV-19/Mexico/BCN-LANGEBIO_IMSS_1438/2021     | EPI_ISL_2942560 | 18/06/21        | North America / Mexico / Baja California | Human |                                 | Female | 32          | Ambulatory     | Nasopharyngeal and pharyngeal swabs    |
| hCoV-19/Mexico/BCN-LANGEBIO_IMSS_1439/2021     | EPI_ISL_2942561 | 21/06/21        | North America / Mexico / Baja California | Human |                                 | Male   | 47          | Ambulatory     | Nasopharyngeal and pharyngeal swabs    |
| hCoV-19/Mexico/BCN-LANGEBIO_IMSS_1802/2021     | EPI_ISL_2942877 | 29/06/21        | North America / Mexico / Baja California | Human |                                 | Male   | 38          | Ambulatory     | Nasopharyngeal and pharyngeal swabs    |
| hCoV-19/Mexico/BCS_IBT_IMSS_1673/2021          | EPI_ISL_2681213 | 29/05/21        | North America / Mexico / Baja California | Human |                                 | Male   | 51          | Ambulatory     | Nasopharyngeal and pharyngeal swabs    |
| hCoV-19/Mexico/BCS_INER_IMSS_00663/2021        | EPI_ISL_1585658 | 17/03/21        | North America / Mexico / Baja California | Human |                                 | Female | 32          | Ambulatory     | Nasopharyngeal and oropharyngeal swabs |
| hCoV-19/Mexico/BCS-IBT_IMSS_1951/2021          | EPI_ISL_2801812 | 02/06/21        | North America / Mexico / Baja California | Human |                                 | Female | 36          | Ambulatory     | Nasopharyngeal and pharyngeal swabs    |
| hCoV-19/Mexico/BCS-IBT_IMSS_1970/2021          | EPI_ISL_2801828 | 02/06/21        | North America / Mexico / Baja California | Human |                                 | Female | 34          | Ambulatory     | Nasopharyngeal and pharyngeal swabs    |
| hCoV-19/Mexico/CAM_IBT_IMSS_10304-NC/2021      | EPI_ISL_2681370 | 02/06/21        | North America / Mexico / Campeche        | Human |                                 | Female | 39          | Hospitalized   | Nasopharyngeal and pharyngeal swabs    |
| hCoV-19/Mexico/CAM_IBT_IMSS_1746/2021          | EPI_ISL_2681118 | 01/06/21        | North America / Mexico / Campeche        | Human |                                 | Male   | 40          | Ambulatory     | Nasopharyngeal and pharyngeal swabs    |
| hCoV-19/Mexico/CAM_INER_IMSS_1117/2021         | EPI_ISL_2490327 | 29/04/21        | North America / Mexico / Campeche        | Human |                                 | Female | 56          | Ambulatory     | Nasopharyngeal and oropharyngeal swabs |
| hCoV-19/Mexico/CAM_INER_IMSS_1141/2021         | EPI_ISL_2490328 | 06/05/21        | North America / Mexico / Campeche        | Human |                                 | Female | 26          | Ambulatory     | Nasopharyngeal and oropharyngeal swabs |
| hCoV-19/Mexico/CAM_INER_IMSS_1151/2021         | EPI_ISL_2490329 | 10/05/21        | North America / Mexico / Campeche        | Human |                                 | Female | 22          | Ambulatory     | Nasopharyngeal and oropharyngeal swabs |
| hCoV-19/Mexico/CAM_LANGEBIO_IMSS_0625/2021     | EPI_ISL_2402042 | 21/04/21        | North America / Mexico / Campeche        | Human |                                 | Male   | 27          | Ambulatory     | Nasopharyngeal and pharyngeal swabs    |
| hCoV-19/Mexico/CAM_LANGEBIO_IMSS_08144-NC/2021 | EPI_ISL_2969870 | 26/04/21        | North America / Mexico / Campeche        | Human |                                 | Female | 30          | Ambulatory     | Nasopharyngeal and pharyngeal swabs    |
| hCoV-19/Mexico/CAM-IBT_IMSS_1865/2021          | EPI_ISL_2801583 | 03/06/21        | North America / Mexico / Campeche        | Human |                                 | Female | 30          | Ambulatory     | Nasopharyngeal and pharyngeal swabs    |
| hCoV-19/Mexico/CAM-IBT_IMSS_1876/2021          | EPI_ISL_2801584 | 04/06/21        | North America / Mexico / Campeche        | Human |                                 | Female | 84          | Hospitalized   | Nasopharyngeal and pharyngeal swabs    |
| hCoV-19/Mexico/CAM-IBT_IMSS_2098/2021          | EPI_ISL_2801645 | 07/06/21        | North America / Mexico / Campeche        | Human |                                 | Female | 65          | Hospitalized   | Nasopharyngeal and pharyngeal swabs    |
| hCoV-19/Mexico/CAM-IBT_IMSS_2102/2021          | EPI_ISL_2801649 | 07/06/21        | North America / Mexico / Campeche        | Human |                                 | Female | 54          | Ambulatory     | Nasopharyngeal and pharyngeal swabs    |
| hCoV-19/Mexico/CAM-LANGEBIO_IMSS_0940/2021     | EPI_ISL_2671501 | 20/05/21        | North America / Mexico / Campeche        | Human |                                 | Female | 58          | Ambulatory     | Nasopharyngeal and pharyngeal swabs    |
| hCoV-19/Mexico/CAM-LANGEBIO_IMSS_1190/2021     | EPI_ISL_2942351 | 18/06/21        | North America / Mexico / Campeche        | Human |                                 | Female | 32          | Ambulatory     | Nasopharyngeal and pharyngeal swabs    |
| hCoV-19/Mexico/CAM-LANGEBIO_IMSS_1205/2021     | EPI_ISL_2942366 | 18/06/21        | North America / Mexico / Campeche        | Human |                                 | Male   | 32          | Ambulatory     | Nasopharyngeal and pharyngeal swabs    |
| hCoV-19/Mexico/CAM-LANGEBIO_IMSS_1207/2021     | EPI_ISL_2942368 | 20/06/21        | North America / Mexico / Campeche        | Human |                                 | Female | 49          | Ambulatory     | Nasopharyngeal and pharyngeal swabs    |
| hCoV-19/Mexico/CAM-LANGEBIO_IMSS_1228/2021     | EPI_ISL_2942389 | 21/06/21        | North America / Mexico / Campeche        | Human |                                 | Female | 22          | Ambulatory     | Nasopharyngeal and pharyngeal swabs    |
| hCoV-19/Mexico/CAM-LANGEBIO_IMSS_1231/2021     | EPI_ISL_2942392 | 21/06/21        | North America / Mexico / Campeche        | Human |                                 | Male   | 32          | Ambulatory     | Nasopharyngeal and pharyngeal swabs    |
| hCoV-19/Mexico/CAM-LANGEBIO_IMSS_1548/2021     | EPI_ISL_2942659 | 26/06/21        | North America / Mexico / Campeche        | Human |                                 | Male   | 45          | Hospitalized   | Nasopharyngeal and pharyngeal swabs    |
| hCoV-19/Mexico/CAM-LANGEBIO_IMSS_1571/2021     | EPI_ISL_2942682 | 26/06/21        | North America / Mexico / Campeche        | Human |                                 | Female | 8           | Ambulatory     | Nasopharyngeal and pharyngeal swabs    |
| hCoV-19/Mexico/CHH_IBT_IMSS_1367/2021          | EPI_ISL_2391727 | 12/03/21        | North America / Mexico / Chihuahua       | Human |                                 | Female | 25          | Ambulatory     | Nasopharyngeal and pharyngeal swabs    |
| hCoV-19/Mexico/CHH_IBT_IMSS_1370/2021          | EPI_ISL_2391639 | 11/03/21        | North America / Mexico / Chihuahua       | Human |                                 | Male   | 83          | Hospitalized   | Nasopharyngeal and pharyngeal swabs    |
| hCoV-19/Mexico/CHH_IBT_IMSS_1423/2021          | EPI_ISL_2681357 | 31/05/21        | North America / Mexico / Chihuahua       | Human |                                 | Male   | 20          | Ambulatory     | Nasopharyngeal and pharyngeal swabs    |
| hCoV-19/Mexico/CHH_IBT_IMSS_1429/2021          | EPI_ISL_2681316 | 02/06/21        | North America / Mexico / Chihuahua       | Human |                                 | Female | 70          | Hospitalized   | Nasopharyngeal and pharyngeal swabs    |
| hCoV-19/Mexico/CHH_IBT_IMSS_1430/2021          | EPI_ISL_2681289 | 02/06/21        | North America / Mexico / Chihuahua       | Human |                                 | Female | 39          | Hospitalized   | Nasopharyngeal and pharyngeal swabs    |
| hCoV-19/Mexico/CHH_IBT_IMSS_1431/2021          | EPI_ISL_2681359 | 02/06/21        | North America / Mexico / Chihuahua       | Human |                                 | Female | 56          | Hospitalized   | Nasopharyngeal and pharyngeal swabs    |
| hCoV-19/Mexico/CHH_IBT_IMSS_1432/2021          | EPI_ISL_2681137 | 27/05/21        | North America / Mexico / Chihuahua       | Human |                                 | Female | 22          | Ambulatory     | Nasopharyngeal and pharyngeal swabs    |
| hCoV-19/Mexico/CHH_IBT_IMSS_1434/2021          | EPI_ISL_2681103 | 26/05/21        | North America / Mexico / Chihuahua       | Human |                                 | Female | 61          | Hospitalized   | Nasopharyngeal and pharyngeal swabs    |
| hCoV-19/Mexico/CHH_IBT_IMSS_1435/2021          | EPI_ISL_2681265 | 26/05/21        | North America / Mexico / Chihuahua       | Human |                                 | Female | 61          | Hospitalized   | Nasopharyngeal and pharyngeal swabs    |
| hCoV-19/Mexico/CHH_IBT_IMSS_1436/2021          | EPI_ISL_2681277 | 27/05/21        | North America / Mexico / Chihuahua       | Human |                                 | Female | 80          | Hospitalized   | Nasopharyngeal and pharyngeal swabs    |
| hCoV-19/Mexico/CHH_IBT_IMSS_1442/2021          | EPI_ISL_2681248 | 31/05/21        | North America / Mexico / Chihuahua       | Human |                                 | Male   | 21          | Ambulatory     | Nasopharyngeal and pharyngeal swabs    |
| hCoV-19/Mexico/CHH_IBT_IMSS_1443/2021          | EPI_ISL_2681219 | 02/06/21        | North America / Mexico / Chihuahua       | Human |                                 | Male   | 27          | Ambulatory     | Nasopharyngeal and pharyngeal swabs    |
| hCoV-19/Mexico/CHH_IBT_IMSS_1444/2021          | EPI_ISL_2681104 | 01/06/21        | North America / Mexico / Chihuahua       | Human |                                 | Female | 22          | Ambulatory     | Nasopharyngeal and pharyngeal swabs    |
| hCoV-19/Mexico/CHH_INER_IMSS_00382/2021        | EPI_ISL_1585392 | 05/03/21        | North America / Mexico / Chihuahua       | Human |                                 | Male   | 33          | Ambulatory     | Nasopharyngeal and oropharyngeal swabs |
| hCoV-19/Mexico/CHH_INER_IMSS_00383/2021        | EPI_ISL_1585393 | 05/03/21        | North America / Mexico / Chihuahua       | Human |                                 | Female | 31          | Ambulatory     | Nasopharyngeal and oropharyngeal swabs |
| hCoV-19/Mexico/CHH_INER_IMSS_00384/2021        | EPI_ISL_1585394 | 08/03/21        | North America / Mexico / Chihuahua       | Human |                                 | Male   | 48          | Hospitalized   | Nasopharyngeal and oropharyngeal swabs |
| hCoV-19/Mexico/CHH_INER_IMSS_00390/2021        | EPI_ISL_1585400 | 09/03/21        | North America / Mexico / Chihuahua       | Human |                                 | Female | 23          | Ambulatory     | Nasopharyngeal and oropharyngeal swabs |
| hCoV-19/Mexico/CHH_INER_IMSS_00743/2021        | EPI_ISL_2091198 | 04/04/21        | North America / Mexico / Chihuahua       | Human |                                 | Male   | 65          | Hospitalized   | Nasopharyngeal and oropharyngeal swabs |
| hCoV-19/Mexico/CHH_INER_IMSS_1042/2021         | EPI_ISL_2490312 | 02/05/21        | North America / Mexico / Chihuahua       | Human |                                 | Male   | 70          | Hospitalized   | Nasopharyngeal and oropharyngeal swabs |

|                                                            |                 |          |                                      |       |        |    |              |                                        |
|------------------------------------------------------------|-----------------|----------|--------------------------------------|-------|--------|----|--------------|----------------------------------------|
| hCoV-19/Mexico/CHH_INER_IMSS_1044/2021                     | EPI_ISL_2490338 | 02/05/21 | North America / Mexico / Chihuahua   | Human | Male   | 50 | Ambulatory   | Nasopharyngeal swab                    |
| hCoV-19/Mexico/CHH_INER_IMSS_1055/2021                     | EPI_ISL_2490314 | 03/05/21 | North America / Mexico / Chihuahua   | Human | Female | 13 | Hospitalized | Nasopharyngeal and oropharyngeal swabs |
| hCoV-19/Mexico/CHH_INER_IMSS_1060/2021                     | EPI_ISL_2490317 | 03/05/21 | North America / Mexico / Chihuahua   | Human | Male   | 61 | Hospitalized | Nasopharyngeal and oropharyngeal swabs |
| hCoV-19/Mexico/CHH_INER_IMSS_1061/2021                     | EPI_ISL_2490318 | 03/05/21 | North America / Mexico / Chihuahua   | Human | Male   | 45 | Hospitalized | Nasopharyngeal and oropharyngeal swabs |
| hCoV-19/Mexico/CHH_INER_IMSS_1062/2021                     | EPI_ISL_2490319 | 04/05/21 | North America / Mexico / Chihuahua   | Human | Female | 41 | Hospitalized | Nasopharyngeal and oropharyngeal swabs |
| hCoV-19/Mexico/CHH_INER_IMSS_1078/2021                     | EPI_ISL_2490321 | 06/05/21 | North America / Mexico / Chihuahua   | Human | Female | 50 | Ambulatory   | Nasopharyngeal and oropharyngeal swabs |
| hCoV-19/Mexico/CHH_INER_IMSS_1082/2021                     | EPI_ISL_2490322 | 07/05/21 | North America / Mexico / Chihuahua   | Human | Female | 53 | Hospitalized | Nasopharyngeal and oropharyngeal swabs |
| hCoV-19/Mexico/CHH_INER_IMSS_1093/2021                     | EPI_ISL_2490323 | 02/05/21 | North America / Mexico / Chihuahua   | Human | Male   | 87 | Hospitalized | Nasopharyngeal and oropharyngeal swabs |
| hCoV-19/Mexico/CHH_INER_IMSS_1094/2021                     | EPI_ISL_2490324 | 04/05/21 | North America / Mexico / Chihuahua   | Human | Female | 59 | Hospitalized | Nasopharyngeal and oropharyngeal swabs |
| hCoV-19/Mexico/CHH_INER_IMSS_1095/2021                     | EPI_ISL_2490325 | 09/05/21 | North America / Mexico / Chihuahua   | Human | Male   | 77 | Hospitalized | Nasopharyngeal and oropharyngeal swabs |
| hCoV-19/Mexico/CHH_INER_IMSS_1103/2021                     | EPI_ISL_2490326 | 11/05/21 | North America / Mexico / Chihuahua   | Human | Female | 69 | Hospitalized | Nasopharyngeal and oropharyngeal swabs |
| hCoV-19/Mexico/CHH_LANGEBIO_IMSS_0275/2021                 | EPI_ISL_1661984 | 25/03/21 | North America / Mexico / Chihuahua   | Human | Female | 30 | Ambulatory   | Nasopharyngeal swab                    |
| hCoV-19/Mexico/CHH_LANGEBIO_IMSS_0278/2021                 | EPI_ISL_1661987 | 26/03/21 | North America / Mexico / Chihuahua   | Human | Female | 87 | Hospitalized | Nasopharyngeal swab                    |
| hCoV-19/Mexico/CHH_LANGEBIO_IMSS_0279/2021                 | EPI_ISL_1661988 | 26/03/21 | North America / Mexico / Chihuahua   | Human | Female | 56 | Hospitalized | Nasopharyngeal swab                    |
| hCoV-19/Mexico/CHH_LANGEBIO_IMSS_0515/2021                 | EPI_ISL_2401942 | 19/04/21 | North America / Mexico / Chihuahua   | Human | Female | 34 | Hospitalized | Pharyngeal swab                        |
| hCoV-19/Mexico/CHH_LANGEBIO_IMSS_0530/2021                 | EPI_ISL_2401957 | 20/04/21 | North America / Mexico / Chihuahua   | Human | Male   | 66 | Hospitalized | Pharyngeal swab                        |
| hCoV-19/Mexico/CHH_LANGEBIO_IMSS_0559/2021                 | EPI_ISL_2401981 | 24/04/21 | North America / Mexico / Chihuahua   | Human | Male   | 80 | Hospitalized | Nasopharyngeal and pharyngeal swabs    |
| hCoV-19/Mexico/CHH_LANGEBIO_IMSS_0561/2021                 | EPI_ISL_2401983 | 21/04/21 | North America / Mexico / Chihuahua   | Human | Male   | 67 | Hospitalized | Nasopharyngeal swab                    |
| hCoV-19/Mexico/CHH_LANGEBIO_IMSS_0572/2021                 | EPI_ISL_2401992 | 23/04/21 | North America / Mexico / Chihuahua   | Human | Male   | 75 | Ambulatory   | Pharyngeal swab                        |
| hCoV-19/Mexico/CHH_LANGEBIO_IMSS_0580/2021                 | EPI_ISL_2402000 | 27/04/21 | North America / Mexico / Chihuahua   | Human | Female | 33 | Ambulatory   | Nasopharyngeal and pharyngeal swabs    |
| hCoV-19/Mexico/CHH_LANGEBIO_IMSS_0582/2021                 | EPI_ISL_2402002 | 26/04/21 | North America / Mexico / Chihuahua   | Human | Male   | 71 | Hospitalized | Nasopharyngeal swab                    |
| hCoV-19/Mexico/CHH_LANGEBIO_IMSS_45998-NC/2EPI_ISL_2969876 | EPI_ISL_2969876 | 22/03/21 | North America / Mexico / Chihuahua   | Human | Male   | 76 | Hospitalized | Nasopharyngeal and pharyngeal swabs    |
| hCoV-19/Mexico/CHH_LANGEBIO_IMSS_46001-NC/2EPI_ISL_2969877 | EPI_ISL_2969877 | 22/03/21 | North America / Mexico / Chihuahua   | Human | Male   | 49 | Hospitalized | Nasopharyngeal and pharyngeal swabs    |
| hCoV-19/Mexico/CHH-IBT_IMSS_1799/2021                      | EPI_ISL_2801678 | 07/06/21 | North America / Mexico / Chihuahua   | Human | Female | 43 | Ambulatory   | Nasopharyngeal swab                    |
| hCoV-19/Mexico/CHH-IBT_IMSS_1813/2021                      | EPI_ISL_2801692 | 08/06/21 | North America / Mexico / Chihuahua   | Human | Male   | 83 | Hospitalized | Nasopharyngeal and pharyngeal swabs    |
| hCoV-19/Mexico/CHH-IBT_IMSS_00220/2021                     | EPI_ISL_1279266 | 10/02/21 | North America / Mexico / Chihuahua   | Human | Male   | 41 | Hospitalized | Nasopharyngeal swab                    |
| hCoV-19/Mexico/CHH-LANGEBIO_IMSS_0835/2021                 | EPI_ISL_2671505 | 13/05/21 | North America / Mexico / Chihuahua   | Human | Female | 59 | Hospitalized | Nasopharyngeal and pharyngeal swabs    |
| hCoV-19/Mexico/CHH-LANGEBIO_IMSS_0836/2021                 | EPI_ISL_2671506 | 14/05/21 | North America / Mexico / Chihuahua   | Human | Male   | 53 | Ambulatory   | Nasopharyngeal and pharyngeal swabs    |
| hCoV-19/Mexico/CHH-LANGEBIO_IMSS_0840/2021                 | EPI_ISL_2671508 | 14/05/21 | North America / Mexico / Chihuahua   | Human | Male   | 73 | Hospitalized | Nasopharyngeal and pharyngeal swabs    |
| hCoV-19/Mexico/CHH-LANGEBIO_IMSS_0841/2021                 | EPI_ISL_2671509 | 14/05/21 | North America / Mexico / Chihuahua   | Human | Male   | 79 | Hospitalized | Nasopharyngeal and pharyngeal swabs    |
| hCoV-19/Mexico/CHH-LANGEBIO_IMSS_0842/2021                 | EPI_ISL_2671510 | 12/05/21 | North America / Mexico / Chihuahua   | Human | Male   | 52 | Hospitalized | Nasopharyngeal and pharyngeal swabs    |
| hCoV-19/Mexico/CHH-LANGEBIO_IMSS_0866/2021                 | EPI_ISL_2671515 | 15/05/21 | North America / Mexico / Chihuahua   | Human | Female | 50 | Hospitalized | Nasopharyngeal and pharyngeal swabs    |
| hCoV-19/Mexico/CHH-LANGEBIO_IMSS_0868/2021                 | EPI_ISL_2671517 | 19/05/21 | North America / Mexico / Chihuahua   | Human | Female | 51 | Hospitalized | Nasopharyngeal and pharyngeal swabs    |
| hCoV-19/Mexico/CHH-LANGEBIO_IMSS_0871/2021                 | EPI_ISL_2671519 | 21/05/21 | North America / Mexico / Chihuahua   | Human | Male   | 48 | Hospitalized | Pharyngeal swab                        |
| hCoV-19/Mexico/CHH-LANGEBIO_IMSS_0879/2021                 | EPI_ISL_2671521 | 20/05/21 | North America / Mexico / Chihuahua   | Human | Female | 50 | Hospitalized | Nasopharyngeal and pharyngeal swabs    |
| hCoV-19/Mexico/CHH-LANGEBIO_IMSS_0887/2021                 | EPI_ISL_2671523 | 21/05/21 | North America / Mexico / Chihuahua   | Human | Female | 57 | Hospitalized | Nasopharyngeal and pharyngeal swabs    |
| hCoV-19/Mexico/CHH-LANGEBIO_IMSS_0889/2021                 | EPI_ISL_2671525 | 24/05/21 | North America / Mexico / Chihuahua   | Human | Male   | 45 | Hospitalized | Nasopharyngeal and pharyngeal swabs    |
| hCoV-19/Mexico/CHH-LANGEBIO_IMSS_1366/2021                 | EPI_ISL_2942497 | 16/06/21 | North America / Mexico / Chihuahua   | Human | Female | 91 | Hospitalized | Nasopharyngeal swab                    |
| hCoV-19/Mexico/CHH-LANGEBIO_IMSS_1379/2021                 | EPI_ISL_2942507 | 22/06/21 | North America / Mexico / Chihuahua   | Human | Male   | 42 | Hospitalized | Nasopharyngeal and pharyngeal swabs    |
| hCoV-19/Mexico/CHH-LANGEBIO_IMSS_1681/2021                 | EPI_ISL_2942772 | 27/06/21 | North America / Mexico / Chihuahua   | Human | Male   | 59 | Hospitalized | Nasopharyngeal and pharyngeal swabs    |
| hCoV-19/Mexico/CMX_IBT_IMSS_11022-NC/2021                  | EPI_ISL_2681369 | 17/05/21 | North America / Mexico / Mexico City | Human | Female | 71 | Hospitalized | Nasopharyngeal swab                    |
| hCoV-19/Mexico/CMX_IBT_IMSS_1133/2021                      | EPI_ISL_2391710 | 30/04/21 | North America / Mexico / Mexico City | Human | Female | 52 | Hospitalized | Nasopharyngeal and pharyngeal swabs    |
| hCoV-19/Mexico/CMX_IBT_IMSS_1134/2021                      | EPI_ISL_2391660 | 30/04/21 | North America / Mexico / Mexico City | Human | Male   | 84 | Hospitalized | Nasopharyngeal and pharyngeal swabs    |
| hCoV-19/Mexico/CMX_IBT_IMSS_1156/2021                      | EPI_ISL_2391508 | 01/05/21 | North America / Mexico / Mexico City | Human | Male   | 57 | Hospitalized | Pharyngeal swab                        |
| hCoV-19/Mexico/CMX_IBT_IMSS_1263/2021                      | EPI_ISL_2391617 | 07/05/21 | North America / Mexico / Mexico City | Human | Male   | 39 | Hospitalized | Pharyngeal swab                        |
| hCoV-19/Mexico/CMX_IBT_IMSS_1281/2021                      | EPI_ISL_2391572 | 27/04/21 | North America / Mexico / Mexico City | Human | Female | 43 | Ambulatory   | Nasopharyngeal and pharyngeal swabs    |
| hCoV-19/Mexico/CMX_IBT_IMSS_1510/2021                      | EPI_ISL_2681352 | 19/05/21 | North America / Mexico / Mexico City | Human | Male   | 54 | Hospitalized | Nasopharyngeal and pharyngeal swabs    |
| hCoV-19/Mexico/CMX_IBT_IMSS_1532/2021                      | EPI_ISL_2681058 | 25/05/21 | North America / Mexico / Mexico City | Human | Female | 45 | Ambulatory   | Nasopharyngeal and pharyngeal swabs    |
| hCoV-19/Mexico/CMX_IBT_IMSS_1535/2021                      | EPI_ISL_2681165 | 25/05/21 | North America / Mexico / Mexico City | Human | Female | 60 | Ambulatory   | Pharyngeal swab                        |
| hCoV-19/Mexico/CMX_IBT_IMSS_1538/2021                      | EPI_ISL_2681310 | 24/05/21 | North America / Mexico / Mexico City | Human | Female | 45 | Hospitalized | Nasopharyngeal and pharyngeal swabs    |
| hCoV-19/Mexico/CMX_IBT_IMSS_1554/2021                      | EPI_ISL_2681167 | 26/05/21 | North America / Mexico / Mexico City | Human | Female | 42 | Ambulatory   | Nasopharyngeal and pharyngeal swabs    |
| hCoV-19/Mexico/CMX_IBT_IMSS_1556/2021                      | EPI_ISL_2681313 | 26/05/21 | North America / Mexico / Mexico City | Human | Female | 23 | Ambulatory   | Nasopharyngeal and pharyngeal swabs    |

|                                                |                 |          |                                      |       |        |    |              |                                        |
|------------------------------------------------|-----------------|----------|--------------------------------------|-------|--------|----|--------------|----------------------------------------|
| hCoV-19/Mexico/CMX_IBT_IMSS_1627/2021          | EPI_ISL_2681216 | 31/05/21 | North America / Mexico / Mexico City | Human | Male   | 41 | Hospitalized | Nasopharyngeal and pharyngeal swabs    |
| hCoV-19/Mexico/CMX_IBT_IMSS_1636/2021          | EPI_ISL_2681195 | 31/05/21 | North America / Mexico / Mexico City | Human | Male   | 41 | Ambulatory   | Nasopharyngeal and pharyngeal swabs    |
| hCoV-19/Mexico/CMX_IBT_IMSS_1637/2021          | EPI_ISL_2681174 | 31/05/21 | North America / Mexico / Mexico City | Human | Female | 17 | Ambulatory   | Nasopharyngeal and pharyngeal swabs    |
| hCoV-19/Mexico/CMX_IBT_IMSS_1638/2021          | EPI_ISL_2681249 | 31/05/21 | North America / Mexico / Mexico City | Human | Female | 46 | Ambulatory   | Nasopharyngeal and pharyngeal swabs    |
| hCoV-19/Mexico/CMX_IBT_IMSS_1643/2021          | EPI_ISL_2681226 | 01/06/21 | North America / Mexico / Mexico City | Human | Male   | 2  | Ambulatory   | Nasopharyngeal and pharyngeal swabs    |
| hCoV-19/Mexico/CMX_IBT_IMSS_1644/2021          | EPI_ISL_2681132 | 01/06/21 | North America / Mexico / Mexico City | Human | Female | 22 | Ambulatory   | Nasopharyngeal and pharyngeal swabs    |
| hCoV-19/Mexico/CMX_IBT_IMSS_1679/2021          | EPI_ISL_2681062 | 02/06/21 | North America / Mexico / Mexico City | Human | Female | 81 | Ambulatory   | Nasopharyngeal and pharyngeal swabs    |
| hCoV-19/Mexico/CMX_IBT_IMSS_1686/2021          | EPI_ISL_2681066 | 03/06/21 | North America / Mexico / Mexico City | Human | Male   | 34 | Ambulatory   | Nasopharyngeal and pharyngeal swabs    |
| hCoV-19/Mexico/CMX_INER_IMSS_00652/2021        | EPI_ISL_1585647 | 21/03/21 | North America / Mexico / Mexico City | Human | Male   | 47 | Hospitalized | Nasopharyngeal and oropharyngeal swabs |
| hCoV-19/Mexico/CMX_INER_IMSS_00878/2021        | EPI_ISL_2091329 | 08/04/21 | North America / Mexico / Mexico City | Human | Male   | 83 | Hospitalized | Nasopharyngeal swab                    |
| hCoV-19/Mexico/CMX_INER_IMSS_00979/2021        | EPI_ISL_2091419 | 16/04/21 | North America / Mexico / Mexico City | Human | Male   | 0  | Ambulatory   | Oropharyngeal swab                     |
| hCoV-19/Mexico/CMX_INER_IMSS_1254/2021         | EPI_ISL_2490349 | 10/05/21 | North America / Mexico / Mexico City | Human | Female | 26 | Ambulatory   | Nasopharyngeal and oropharyngeal swabs |
| hCoV-19/Mexico/CMX-IBT_IMSS_15419-NC/2021      | EPI_ISL_2801784 | 01/06/21 | North America / Mexico / Mexico City | Human | Female | 74 | Ambulatory   | Pharyngeal swab                        |
| hCoV-19/Mexico/CMX-IBT_IMSS_1898/2021          | EPI_ISL_2801765 | 31/05/21 | North America / Mexico / Mexico City | Human | Female | 37 | Ambulatory   | Nasopharyngeal and pharyngeal swabs    |
| hCoV-19/Mexico/CMX-IBT_IMSS_1917/2021          | EPI_ISL_2801781 | 01/06/21 | North America / Mexico / Mexico City | Human | Female | 37 | Ambulatory   | Nasopharyngeal and pharyngeal swabs    |
| hCoV-19/Mexico/CMX-IBT_IMSS_1931/2021          | EPI_ISL_2801797 | 04/06/21 | North America / Mexico / Mexico City | Human | Male   | 78 | Ambulatory   | Nasopharyngeal and pharyngeal swabs    |
| hCoV-19/Mexico/CMX-INER-IBT-0189/2021          | EPI_ISL_2346447 | 18/04/21 | North America / Mexico / Mexico City | Human | Male   | 40 | Hospitalized | Oropharyngeal swab                     |
| hCoV-19/Mexico/CMX-INER-IBT-0191/2021          | EPI_ISL_2346449 | 18/04/21 | North America / Mexico / Mexico City | Human | Male   | 63 | Hospitalized | Oropharyngeal swab                     |
| hCoV-19/Mexico/CMX-INER-IBT-0192/2021          | EPI_ISL_2346450 | 18/04/21 | North America / Mexico / Mexico City | Human | Male   | 65 | Hospitalized | Oropharyngeal swab                     |
| hCoV-19/Mexico/CMX-INER-IBT-0226/2021          | EPI_ISL_2490585 | 11/05/21 | North America / Mexico / Mexico City | Human | Female | 46 | Hospitalized | Oropharyngeal swab                     |
| hCoV-19/Mexico/CMX-INER-IBT-0244/2021          | EPI_ISL_2648114 | 02/05/21 | North America / Mexico / Mexico City | Human | Female | 65 | unknown      | Oropharyngeal swab                     |
| hCoV-19/Mexico/CMX-INER-IBT-0249/2021          | EPI_ISL_2648118 | 01/06/21 | North America / Mexico / Mexico City | Human | Male   | 31 | Ambulatory   | Oropharyngeal swab                     |
| hCoV-19/Mexico/CMX-INER-IBT-0250/2021          | EPI_ISL_2648119 | 21/04/21 | North America / Mexico / Mexico City | Human | Male   | 86 | unknown      | Oropharyngeal swab                     |
| hCoV-19/Mexico/CMX-INER-IBT-0273/2021          | EPI_ISL_2777228 | 14/06/21 | North America / Mexico / Mexico City | Human | Male   | 19 | unknown      | Oropharyngeal swab                     |
| hCoV-19/Mexico/CMX-LANGEBIO_IMSS_1049/2021     | EPI_ISL_2671526 | 17/05/21 | North America / Mexico / Mexico City | Human | Female | 35 | Ambulatory   | Nasopharyngeal and pharyngeal swabs    |
| hCoV-19/Mexico/CMX-LANGEBIO_IMSS_1069/2021     | EPI_ISL_2671531 | 17/05/21 | North America / Mexico / Mexico City | Human | Male   | 58 | Hospitalized | Pharyngeal swab                        |
| hCoV-19/Mexico/CMX-LANGEBIO_IMSS_1117/2021     | EPI_ISL_2671536 | 20/05/21 | North America / Mexico / Mexico City | Human | Male   | 49 | Ambulatory   | Nasopharyngeal and pharyngeal swabs    |
| hCoV-19/Mexico/CMX-LANGEBIO_IMSS_1122/2021     | EPI_ISL_2671538 | 20/05/21 | North America / Mexico / Mexico City | Human | Male   | 55 | Hospitalized | Pharyngeal swab                        |
| hCoV-19/Mexico/CMX-LANGEBIO_IMSS_1461/2021     | EPI_ISL_2942580 | 08/06/21 | North America / Mexico / Mexico City | Human | Male   | 30 | Ambulatory   | Nasopharyngeal and pharyngeal swabs    |
| hCoV-19/Mexico/CMX-LANGEBIO_IMSS_1463/2021     | EPI_ISL_2942582 | 07/06/21 | North America / Mexico / Mexico City | Human | Female | 47 | Ambulatory   | Nasopharyngeal and pharyngeal swabs    |
| hCoV-19/Mexico/CMX-LANGEBIO_IMSS_1466/2021     | EPI_ISL_2942584 | 07/06/21 | North America / Mexico / Mexico City | Human | Female | 83 | Hospitalized | Nasopharyngeal and pharyngeal swabs    |
| hCoV-19/Mexico/COA_IBT_IMSS_1400/2021          | EPI_ISL_2681095 | 29/05/21 | North America / Mexico / Coahuila    | Human | Male   | 34 | Ambulatory   | Nasopharyngeal and pharyngeal swabs    |
| hCoV-19/Mexico/COA_INER_IMSS_1085/2021         | EPI_ISL_2490340 | 08/05/21 | North America / Mexico / Coahuila    | Human | Female | 39 | Ambulatory   | Nasopharyngeal and oropharyngeal swabs |
| hCoV-19/Mexico/COA_LANGEBIO_IMSS_0535/2021     | EPI_ISL_2401962 | 22/04/21 | North America / Mexico / Coahuila    | Human | Male   | 80 | Ambulatory   | Nasopharyngeal and pharyngeal swabs    |
| hCoV-19/Mexico/COA_LANGEBIO_IMSS_0575/2021     | EPI_ISL_2401995 | 28/04/21 | North America / Mexico / Coahuila    | Human | Female | 55 | Hospitalized | Nasopharyngeal and pharyngeal swabs    |
| hCoV-19/Mexico/COA_LANGEBIO_IMSS_0592/2021     | EPI_ISL_2402011 | 17/04/21 | North America / Mexico / Coahuila    | Human | Female | 62 | Ambulatory   | Nasopharyngeal and pharyngeal swabs    |
| hCoV-19/Mexico/COA_LANGEBIO_IMSS_0594/2021     | EPI_ISL_2402013 | 16/04/21 | North America / Mexico / Coahuila    | Human | Male   | 45 | Hospitalized | Nasopharyngeal and pharyngeal swabs    |
| hCoV-19/Mexico/COA_LANGEBIO_IMSS_0595/2021     | EPI_ISL_2402014 | 17/04/21 | North America / Mexico / Coahuila    | Human | Female | 55 | Hospitalized | Nasopharyngeal and pharyngeal swabs    |
| hCoV-19/Mexico/COA_LANGEBIO_IMSS_69504-NC/2021 | EPI_ISL_2969925 | 30/06/21 | North America / Mexico / Coahuila    | Human | Female | 27 | Ambulatory   | Nasopharyngeal and pharyngeal swabs    |
| hCoV-19/Mexico/COA-IBT_IMSS_1820/2021          | EPI_ISL_2801696 | 11/06/21 | North America / Mexico / Coahuila    | Human | Male   | 47 | Ambulatory   | Nasopharyngeal and pharyngeal swabs    |
| hCoV-19/Mexico/COA-LANGEBIO_IMSS_0874/2021     | EPI_ISL_2671546 | 23/05/21 | North America / Mexico / Coahuila    | Human | Female | 57 | Hospitalized | Nasopharyngeal and pharyngeal swabs    |
| hCoV-19/Mexico/COA-LANGEBIO_IMSS_1345/2021     | EPI_ISL_2942482 | 12/06/21 | North America / Mexico / Coahuila    | Human | Male   | 87 | Hospitalized | Nasopharyngeal and pharyngeal swabs    |
| hCoV-19/Mexico/COA-LANGEBIO_IMSS_1377/2021     | EPI_ISL_2942505 | 24/06/21 | North America / Mexico / Coahuila    | Human | Female | 31 | Hospitalized | Nasopharyngeal and pharyngeal swabs    |
| hCoV-19/Mexico/COA-LANGEBIO_IMSS_1381/2021     | EPI_ISL_2942509 | 25/06/21 | North America / Mexico / Coahuila    | Human | Male   | 18 | Ambulatory   | Nasopharyngeal and pharyngeal swabs    |
| hCoV-19/Mexico/COA-LANGEBIO_IMSS_1672/2021     | EPI_ISL_2942765 | 27/06/21 | North America / Mexico / Coahuila    | Human | Female | 48 | Ambulatory   | Nasopharyngeal and pharyngeal swabs    |
| hCoV-19/Mexico/COA-LANGEBIO_IMSS_1675/2021     | EPI_ISL_2942768 | 26/06/21 | North America / Mexico / Coahuila    | Human | Male   | 63 | Ambulatory   | Nasopharyngeal and pharyngeal swabs    |
| hCoV-19/Mexico/COA-LANGEBIO_IMSS_1696/2021     | EPI_ISL_2942785 | 30/06/21 | North America / Mexico / Coahuila    | Human | Female | 77 | Hospitalized | Nasopharyngeal and pharyngeal swabs    |
| hCoV-19/Mexico/COL_LANGEBIO_IMSS_0767/2021     | EPI_ISL_2402178 | 30/04/21 | North America / Mexico / Colima      | Human | Female | 50 | Hospitalized | Nasopharyngeal and pharyngeal swabs    |
| hCoV-19/Mexico/COL-IBT_IMSS_1847/2021          | EPI_ISL_2801720 | 02/06/21 | North America / Mexico / Colima      | Human | Male   | 30 | Hospitalized | Nasopharyngeal and pharyngeal swabs    |
| hCoV-19/Mexico/COL-IBT_IMSS_1868/2021          | EPI_ISL_2801737 | 06/06/21 | North America / Mexico / Colima      | Human | Male   | 74 | Hospitalized | Nasopharyngeal and pharyngeal swabs    |
| hCoV-19/Mexico/COL-LANGEBIO_IMSS_1011/2021     | EPI_ISL_2671550 | 19/05/21 | North America / Mexico / Colima      | Human | Male   | 30 | Hospitalized | Nasopharyngeal and pharyngeal swabs    |
| hCoV-19/Mexico/COL-LANGEBIO_IMSS_1033/2021     | EPI_ISL_2671554 | 24/05/21 | North America / Mexico / Colima      | Human | Male   | 45 | Ambulatory   | Nasopharyngeal and pharyngeal swabs    |



|                                            |                 |          |                                          |       |        |    |              |                                        |
|--------------------------------------------|-----------------|----------|------------------------------------------|-------|--------|----|--------------|----------------------------------------|
| hCoV-19/Mexico/COL-LANGEBIO_IMSS_1045/2021 | EPI_ISL_2671556 | 29/05/21 | North America / Mexico / Colima          | Human | Male   | 53 | Hospitalized | Nasopharyngeal and pharyngeal swabs    |
| hCoV-19/Mexico/COL-LANGEBIO_IMSS_1046/2021 | EPI_ISL_2671557 | 29/05/21 | North America / Mexico / Colima          | Human | Female | 35 | Hospitalized | Nasopharyngeal and pharyngeal swabs    |
| hCoV-19/Mexico/COL-LANGEBIO_IMSS_1266/2021 | EPI_ISL_2942424 | 16/06/21 | North America / Mexico / Colima          | Human | Female | 59 | Hospitalized | Nasopharyngeal and pharyngeal swabs    |
| hCoV-19/Mexico/DUR_IBT_IMSS_1409/2021      | EPI_ISL_2681086 | 01/06/21 | North America / Mexico / Durango         | Human | Female | 67 | Hospitalized | Nasopharyngeal and pharyngeal swabs    |
| hCoV-19/Mexico/DUR_INER_IMSS_1050/2021     | EPI_ISL_2490339 | 06/05/21 | North America / Mexico / Durango         | Human | Male   | 27 | Ambulatory   | Nasopharyngeal and oropharyngeal swabs |
| hCoV-19/Mexico/DUR_LANGEBIO_IMSS_0551/2021 | EPI_ISL_2401974 | 24/04/21 | North America / Mexico / Durango         | Human | Male   | 73 | Hospitalized | Nasopharyngeal and pharyngeal swabs    |
| hCoV-19/Mexico/DUR-LANGEBIO_IMSS_0824/2021 | EPI_ISL_2671558 | 15/05/21 | North America / Mexico / Durango         | Human | Female | 58 | Hospitalized | Nasopharyngeal and pharyngeal swabs    |
| hCoV-19/Mexico/DUR-LANGEBIO_IMSS_0870/2021 | EPI_ISL_2671559 | 21/05/21 | North America / Mexico / Durango         | Human | Male   | 43 | Ambulatory   | Nasopharyngeal and pharyngeal swabs    |
| hCoV-19/Mexico/DUR-LANGEBIO_IMSS_1371/2021 | EPI_ISL_2942501 | 21/06/21 | North America / Mexico / Durango         | Human | Male   | 46 | Ambulatory   | Nasopharyngeal and pharyngeal swabs    |
| hCoV-19/Mexico/GRO-IBT_IMSS_1934/2021      | EPI_ISL_2801799 | 03/06/21 | North America / Mexico / Guerrero        | Human | Female | 32 | Ambulatory   | Nasopharyngeal and pharyngeal swabs    |
| hCoV-19/Mexico/GRO-IBT_IMSS_2023/2021      | EPI_ISL_2801870 | 07/06/21 | North America / Mexico / Guerrero        | Human | Male   | 33 | Ambulatory   | Nasopharyngeal and pharyngeal swabs    |
| hCoV-19/Mexico/GRO-LANGEBIO_IMSS_1391/2021 | EPI_ISL_2942518 | 16/06/21 | North America / Mexico / Guerrero        | Human | Male   | 53 | Ambulatory   | Nasopharyngeal and pharyngeal swabs    |
| hCoV-19/Mexico/GUA_INER_IMSS_00836/2021    | EPI_ISL_2091287 | 05/04/21 | North America / Mexico / Guanajuato      | Human | Male   | 24 | Ambulatory   | Nasopharyngeal and oropharyngeal swabs |
| hCoV-19/Mexico/GUA_INER_IMSS_00867/2021    | EPI_ISL_2091318 | 16/04/21 | North America / Mexico / Guanajuato      | Human | Female | 58 | Hospitalized | Nasopharyngeal and oropharyngeal swabs |
| hCoV-19/Mexico/GUA-LANGEBIO_IMSS_1001/2021 | EPI_ISL_2671564 | 17/05/21 | North America / Mexico / Guanajuato      | Human | Female | 68 | Hospitalized | Nasopharyngeal and pharyngeal swabs    |
| hCoV-19/Mexico/GUA-LANGEBIO_IMSS_1003/2021 | EPI_ISL_2671565 | 17/05/21 | North America / Mexico / Guanajuato      | Human | Male   | 71 | Ambulatory   | Nasopharyngeal and pharyngeal swabs    |
| hCoV-19/Mexico/GUA-LANGEBIO_IMSS_1013/2021 | EPI_ISL_2671567 | 21/05/21 | North America / Mexico / Guanajuato      | Human | Male   | 50 | Hospitalized | Nasopharyngeal and pharyngeal swabs    |
| hCoV-19/Mexico/HID-LANGEBIO_IMSS_1451/2021 | EPI_ISL_2942571 | 25/06/21 | North America / Mexico / Hidalgo         | Human | Male   | 11 | Ambulatory   | Nasopharyngeal swab                    |
| hCoV-19/Mexico/JAL_INER_IMSS_00822/2021    | EPI_ISL_2091273 | 09/04/21 | North America / Mexico / Jalisco         | Human | Male   | 46 | Ambulatory   | Nasopharyngeal and oropharyngeal swabs |
| hCoV-19/Mexico/JAL_LANGEBIO_IMSS_0755/2021 | EPI_ISL_2402166 | 27/04/21 | North America / Mexico / Jalisco         | Human | Male   | 56 | Hospitalized | Nasopharyngeal and pharyngeal swabs    |
| hCoV-19/Mexico/JAL-IBT_IMSS_1852/2021      | EPI_ISL_2801725 | 03/06/21 | North America / Mexico / Jalisco         | Human | Male   | 24 | Hospitalized | Nasopharyngeal and pharyngeal swabs    |
| hCoV-19/Mexico/JAL-IBT_IMSS_1881/2021      | EPI_ISL_2801747 | 11/06/21 | North America / Mexico / Jalisco         | Human | Male   | 30 | Ambulatory   | Nasopharyngeal and pharyngeal swabs    |
| hCoV-19/Mexico/JAL-LANGEBIO_IMSS_1009/2021 | EPI_ISL_2671572 | 21/05/21 | North America / Mexico / Jalisco         | Human | Female | 25 | Ambulatory   | Nasopharyngeal and pharyngeal swabs    |
| hCoV-19/Mexico/JAL-LANGEBIO_IMSS_1015/2021 | EPI_ISL_2671573 | 21/05/21 | North America / Mexico / Jalisco         | Human | Male   | 22 | Ambulatory   | Nasopharyngeal and pharyngeal swabs    |
| hCoV-19/Mexico/JAL-LANGEBIO_IMSS_1024/2021 | EPI_ISL_2671577 | 25/05/21 | North America / Mexico / Jalisco         | Human | Female | 54 | Ambulatory   | Nasopharyngeal and pharyngeal swabs    |
| hCoV-19/Mexico/JAL-LANGEBIO_IMSS_1032/2021 | EPI_ISL_2671581 | 25/05/21 | North America / Mexico / Jalisco         | Human | Female | 89 | Ambulatory   | Nasopharyngeal swab                    |
| hCoV-19/Mexico/JAL-LANGEBIO_IMSS_1247/2021 | EPI_ISL_2942408 | 15/06/21 | North America / Mexico / Jalisco         | Human | Female | 40 | Ambulatory   | Nasopharyngeal and pharyngeal swabs    |
| hCoV-19/Mexico/JAL-LANGEBIO_IMSS_1257/2021 | EPI_ISL_2942416 | 15/06/21 | North America / Mexico / Jalisco         | Human | Female | 41 | Ambulatory   | Nasopharyngeal and pharyngeal swabs    |
| hCoV-19/Mexico/JAL-LANGEBIO_IMSS_1281/2021 | EPI_ISL_2942436 | 20/06/21 | North America / Mexico / Jalisco         | Human | Male   | 66 | Hospitalized | Nasopharyngeal and pharyngeal swabs    |
| hCoV-19/Mexico/JAL-LANGEBIO_IMSS_1317/2021 | EPI_ISL_2942464 | 25/06/21 | North America / Mexico / Jalisco         | Human | Male   | 38 | Ambulatory   | Nasopharyngeal and pharyngeal swabs    |
| hCoV-19/Mexico/JAL-LANGEBIO_IMSS_1621/2021 | EPI_ISL_2942725 | 29/06/21 | North America / Mexico / Jalisco         | Human | Male   | 39 | Hospitalized | Nasopharyngeal and pharyngeal swabs    |
| hCoV-19/Mexico/MEX_IBT_IMSS_1135/2021      | EPI_ISL_2391531 | 30/04/21 | North America / Mexico / State of Mexico | Human | Female | 78 | Hospitalized | Pharyngeal swab                        |
| hCoV-19/Mexico/MEX_IBT_IMSS_1249/2021      | EPI_ISL_2391647 | 06/05/21 | North America / Mexico / State of Mexico | Human | Male   | 51 | Ambulatory   | Nasopharyngeal and pharyngeal swabs    |
| hCoV-19/Mexico/MEX_IBT_IMSS_1512/2021      | EPI_ISL_2681069 | 24/05/21 | North America / Mexico / State of Mexico | Human | Female | 54 | Ambulatory   | Nasopharyngeal and pharyngeal swabs    |
| hCoV-19/Mexico/MEX_IBT_IMSS_1513/2021      | EPI_ISL_2681215 | 21/05/21 | North America / Mexico / State of Mexico | Human | Male   | 43 | Hospitalized | Nasopharyngeal and pharyngeal swabs    |
| hCoV-19/Mexico/MEX_IBT_IMSS_1571/2021      | EPI_ISL_2681111 | 27/05/21 | North America / Mexico / State of Mexico | Human | Female | 33 | Hospitalized | Nasopharyngeal and pharyngeal swabs    |
| hCoV-19/Mexico/MEX_IBT_IMSS_1667/2021      | EPI_ISL_2681238 | 31/05/21 | North America / Mexico / State of Mexico | Human | Male   | 58 | Hospitalized | Nasopharyngeal and pharyngeal swabs    |
| hCoV-19/Mexico/MEX_INER_IMSS_00690/2021    | EPI_ISL_2091146 | 19/03/21 | North America / Mexico / State of Mexico | Human | Male   | 66 | Hospitalized | Nasopharyngeal and oropharyngeal swabs |
| hCoV-19/Mexico/MEX_LANGEBIO_IMSS_20813-NC/ | EPI_ISL_2969962 | 18/06/21 | North America / Mexico / State of Mexico | Human | Male   | 27 | Hospitalized | Nasopharyngeal and pharyngeal swabs    |
| hCoV-19/Mexico/MEX-IBT_IMSS_14917-NC/2021  | EPI_ISL_2801753 | 27/05/21 | North America / Mexico / State of Mexico | Human | Female | 58 | Ambulatory   | Nasopharyngeal and pharyngeal swabs    |
| hCoV-19/Mexico/MEX-LANGEBIO_IMSS_1085/2021 | EPI_ISL_2671594 | 18/05/21 | North America / Mexico / State of Mexico | Human | Female | 82 | Hospitalized | Nasopharyngeal and pharyngeal swabs    |
| hCoV-19/Mexico/MEX-LANGEBIO_IMSS_1114/2021 | EPI_ISL_2671601 | 19/05/21 | North America / Mexico / State of Mexico | Human | Male   | 46 | Ambulatory   | Nasopharyngeal and pharyngeal swabs    |
| hCoV-19/Mexico/MEX-LANGEBIO_IMSS_1121/2021 | EPI_ISL_2671605 | 19/05/21 | North America / Mexico / State of Mexico | Human | Male   | 33 | Ambulatory   | Nasopharyngeal and pharyngeal swabs    |
| hCoV-19/Mexico/MEX-LANGEBIO_IMSS_1474/2021 | EPI_ISL_2942592 | 08/06/21 | North America / Mexico / State of Mexico | Human | Female | 62 | Hospitalized | Nasopharyngeal and pharyngeal swabs    |
| hCoV-19/Mexico/MEX-LANGEBIO_IMSS_1475/2021 | EPI_ISL_2942593 | 08/06/21 | North America / Mexico / State of Mexico | Human | Male   | 40 | Hospitalized | Nasopharyngeal and pharyngeal swabs    |
| hCoV-19/Mexico/MEX-LANGEBIO_IMSS_1476/2021 | EPI_ISL_2942594 | 08/06/21 | North America / Mexico / State of Mexico | Human | Female | 59 | Hospitalized | Nasopharyngeal and pharyngeal swabs    |
| hCoV-19/Mexico/MEX-LANGEBIO_IMSS_1479/2021 | EPI_ISL_2942596 | 08/06/21 | North America / Mexico / State of Mexico | Human | Male   | 31 | Ambulatory   | Nasopharyngeal swab                    |
| hCoV-19/Mexico/MEX-LANGEBIO_IMSS_1576/2021 | EPI_ISL_2942687 | 27/06/21 | North America / Mexico / State of Mexico | Human | Male   | 40 | Hospitalized | Nasopharyngeal and pharyngeal swabs    |
| hCoV-19/Mexico/MIC_INER_IMSS_1184/2021     | EPI_ISL_2490332 | 07/05/21 | North America / Mexico / Michoacan       | Human | Female | 38 | Ambulatory   | Nasopharyngeal and oropharyngeal swabs |
| hCoV-19/Mexico/MOR_IBT_IMSS_1570/2021      | EPI_ISL_2681243 | 26/05/21 | North America / Mexico / Morelos         | Human | Male   | 67 | Ambulatory   | Nasopharyngeal and pharyngeal swabs    |
| hCoV-19/Mexico/MOR_LANGEBIO_IMSS_91231-NC/ | EPI_ISL_2969986 | 25/03/21 | North America / Mexico / Morelos         | Human | Male   | 40 | Hospitalized | Nasopharyngeal and pharyngeal swabs    |
| hCoV-19/Mexico/NAY-IBT_IMSS_1850/2021      | EPI_ISL_2801723 | 01/06/21 | North America / Mexico / Nayarit         | Human | Female | 44 | Ambulatory   | Nasopharyngeal and pharyngeal swabs    |

|                                                |                 |          |                                     |       |        |    |              |                                        |
|------------------------------------------------|-----------------|----------|-------------------------------------|-------|--------|----|--------------|----------------------------------------|
| hCoV-19/Mexico/NAY-IBT_IMSS_1851/2021          | EPI_ISL_2801724 | 02/06/21 | North America / Mexico / Nayarit    | Human | Female | 35 | Ambulatory   | Nasopharyngeal and pharyngeal swabs    |
| hCoV-19/Mexico/NAY-LANGEBIO_IMSS_1041/2021     | EPI_ISL_2671618 | 28/05/21 | North America / Mexico / Nayarit    | Human | Female | 22 | Ambulatory   | Nasopharyngeal and pharyngeal swabs    |
| hCoV-19/Mexico/NLE_IBT_IMSS_1404/2021          | EPI_ISL_2681127 | 01/06/21 | North America / Mexico / Nuevo Leon | Human | Female | 21 | Hospitalized | Nasopharyngeal swab                    |
| hCoV-19/Mexico/NLE_IBT_IMSS_1411/2021          | EPI_ISL_2681303 | 02/06/21 | North America / Mexico / Nuevo Leon | Human | Female | 47 | Ambulatory   | Nasopharyngeal and pharyngeal swabs    |
| hCoV-19/Mexico/NLE_IBT_IMSS_1415/2021          | EPI_ISL_2681197 | 01/06/21 | North America / Mexico / Nuevo Leon | Human | Male   | 34 | Ambulatory   | Nasopharyngeal and pharyngeal swabs    |
| hCoV-19/Mexico/NLE_IBT_IMSS_1418/2021          | EPI_ISL_2681096 | 02/06/21 | North America / Mexico / Nuevo Leon | Human | Male   | 27 | Ambulatory   | Nasopharyngeal and pharyngeal swabs    |
| hCoV-19/Mexico/NLE_IBT_IMSS_1426/2021          | EPI_ISL_2681102 | 02/06/21 | North America / Mexico / Nuevo Leon | Human | Female | 53 | Ambulatory   | Nasopharyngeal and pharyngeal swabs    |
| hCoV-19/Mexico/NLE_IBT_IMSS_1427/2021          | EPI_ISL_2681308 | 02/06/21 | North America / Mexico / Nuevo Leon | Human | Male   | 19 | Ambulatory   | Nasopharyngeal and pharyngeal swabs    |
| hCoV-19/Mexico/NLE_IBT_IMSS_1749/2021          | EPI_ISL_2681358 | 23/05/21 | North America / Mexico / Nuevo Leon | Human | Male   | 41 | Hospitalized | Nasopharyngeal and pharyngeal swabs    |
| hCoV-19/Mexico/NLE_INER_IMSS_00735/2021        | EPI_ISL_2091191 | 08/04/21 | North America / Mexico / Nuevo Leon | Human | Male   | 86 | Hospitalized | Nasopharyngeal and oropharyngeal swabs |
| hCoV-19/Mexico/NLE_INER_IMSS_00746/2021        | EPI_ISL_2091201 | 12/04/21 | North America / Mexico / Nuevo Leon | Human | Male   | 93 | Hospitalized | Nasopharyngeal and oropharyngeal swabs |
| hCoV-19/Mexico/NLE_INER_IMSS_00753/2021        | EPI_ISL_2091207 | 12/04/21 | North America / Mexico / Nuevo Leon | Human | Female | 39 | Hospitalized | Nasopharyngeal and oropharyngeal swabs |
| hCoV-19/Mexico/NLE_INER_IMSS_00765/2021        | EPI_ISL_2091219 | 15/04/21 | North America / Mexico / Nuevo Leon | Human | Male   | 74 | Hospitalized | Nasopharyngeal and oropharyngeal swabs |
| hCoV-19/Mexico/NLE_INER_IMSS_00768/2021        | EPI_ISL_2091222 | 17/04/21 | North America / Mexico / Nuevo Leon | Human | Female | 92 | Hospitalized | Nasopharyngeal and oropharyngeal swabs |
| hCoV-19/Mexico/NLE_INER_IMSS_1018/2021         | EPI_ISL_2490337 | 02/05/21 | North America / Mexico / Nuevo Leon | Human | Female | 87 | Ambulatory   | Nasopharyngeal and oropharyngeal swabs |
| hCoV-19/Mexico/NLE_INER_IMSS_1027/2021         | EPI_ISL_2835916 | 03/05/21 | North America / Mexico / Nuevo Leon | Human | Male   | 25 | Ambulatory   | Nasopharyngeal swab                    |
| hCoV-19/Mexico/NLE_INER_IMSS_1049/2021         | EPI_ISL_2490313 | 06/05/21 | North America / Mexico / Nuevo Leon | Human | Male   | 31 | Ambulatory   | Nasopharyngeal and oropharyngeal swabs |
| hCoV-19/Mexico/NLE_INER_IMSS_1056/2021         | EPI_ISL_2490315 | 07/05/21 | North America / Mexico / Nuevo Leon | Human | Female | 32 | Ambulatory   | Nasopharyngeal and oropharyngeal swabs |
| hCoV-19/Mexico/NLE_INER_IMSS_1058/2021         | EPI_ISL_2490316 | 07/05/21 | North America / Mexico / Nuevo Leon | Human | Male   | 84 | Hospitalized | Nasopharyngeal and oropharyngeal swabs |
| hCoV-19/Mexico/NLE_INER_IMSS_1073/2021         | EPI_ISL_2490320 | 09/05/21 | North America / Mexico / Nuevo Leon | Human | Female | 41 | Hospitalized | Nasopharyngeal and oropharyngeal swabs |
| hCoV-19/Mexico/NLE_INER_IMSS_1091/2021         | EPI_ISL_2490341 | 11/05/21 | North America / Mexico / Nuevo Leon | Human | Female | 12 | Hospitalized | Nasopharyngeal and oropharyngeal swabs |
| hCoV-19/Mexico/NLE_INER_IMSS_1102/2021         | EPI_ISL_2490342 | 12/05/21 | North America / Mexico / Nuevo Leon | Human | Female | 62 | Ambulatory   | Nasopharyngeal and oropharyngeal swabs |
| hCoV-19/Mexico/NLE_LANGEBIO_IMSS_0504/2021     | EPI_ISL_2401933 | 20/04/21 | North America / Mexico / Nuevo Leon | Human | Male   | 50 | Hospitalized | Nasopharyngeal and pharyngeal swabs    |
| hCoV-19/Mexico/NLE_LANGEBIO_IMSS_0508/2021     | EPI_ISL_2401937 | 19/04/21 | North America / Mexico / Nuevo Leon | Human | Male   | 74 | Ambulatory   | Nasopharyngeal and pharyngeal swabs    |
| hCoV-19/Mexico/NLE_LANGEBIO_IMSS_0520/2021     | EPI_ISL_2401947 | 22/04/21 | North America / Mexico / Nuevo Leon | Human | Male   | 90 | Hospitalized | Nasopharyngeal swab                    |
| hCoV-19/Mexico/NLE_LANGEBIO_IMSS_0538/2021     | EPI_ISL_2401965 | 24/04/21 | North America / Mexico / Nuevo Leon | Human | Female | 81 | Hospitalized | Nasopharyngeal and pharyngeal swabs    |
| hCoV-19/Mexico/NLE_LANGEBIO_IMSS_0554/2021     | EPI_ISL_2401977 | 27/04/21 | North America / Mexico / Nuevo Leon | Human | Male   | 33 | Hospitalized | Nasopharyngeal and pharyngeal swabs    |
| hCoV-19/Mexico/NLE_LANGEBIO_IMSS_0555/2021     | EPI_ISL_2401978 | 27/04/21 | North America / Mexico / Nuevo Leon | Human | Female | 58 | Hospitalized | Nasopharyngeal and pharyngeal swabs    |
| hCoV-19/Mexico/NLE_LANGEBIO_IMSS_0565/2021     | EPI_ISL_2401987 | 27/04/21 | North America / Mexico / Nuevo Leon | Human | Male   | 72 | Hospitalized | Nasopharyngeal and pharyngeal swabs    |
| hCoV-19/Mexico/NLE_LANGEBIO_IMSS_0568/2021     | EPI_ISL_2401990 | 28/04/21 | North America / Mexico / Nuevo Leon | Human | Female | 31 | Ambulatory   | Nasopharyngeal and pharyngeal swabs    |
| hCoV-19/Mexico/NLE_LANGEBIO_IMSS_0586/2021     | EPI_ISL_2402006 | 02/05/21 | North America / Mexico / Nuevo Leon | Human | Male   | 49 | Hospitalized | Nasopharyngeal swab                    |
| hCoV-19/Mexico/NLE_LANGEBIO_IMSS_0587/2021     | EPI_ISL_2402007 | 02/05/21 | North America / Mexico / Nuevo Leon | Human | Male   | 55 | Hospitalized | Nasopharyngeal and pharyngeal swabs    |
| hCoV-19/Mexico/NLE_LANGEBIO_IMSS_61186-NC/2021 | EPI_ISL_2970006 | 19/05/21 | North America / Mexico / Nuevo Leon | Human | Female | 56 | Hospitalized | Nasopharyngeal and pharyngeal swabs    |
| hCoV-19/Mexico/NLE-IBT_IMSS_1764/2021          | EPI_ISL_2801661 | 03/06/21 | North America / Mexico / Nuevo Leon | Human | Male   | 48 | Hospitalized | Nasopharyngeal and pharyngeal swabs    |
| hCoV-19/Mexico/NLE-IBT_IMSS_1768/2021          | EPI_ISL_2801663 | 03/06/21 | North America / Mexico / Nuevo Leon | Human | Female | 45 | Ambulatory   | Pharyngeal swab                        |
| hCoV-19/Mexico/NLE-IBT_IMSS_1772/2021          | EPI_ISL_2801666 | 04/06/21 | North America / Mexico / Nuevo Leon | Human | Female | 80 | Ambulatory   | Nasopharyngeal and pharyngeal swabs    |
| hCoV-19/Mexico/NLE-IBT_IMSS_1774/2021          | EPI_ISL_2801667 | 04/06/21 | North America / Mexico / Nuevo Leon | Human | Female | 51 | Hospitalized | Nasopharyngeal swab                    |
| hCoV-19/Mexico/NLE-IBT_IMSS_1779/2021          | EPI_ISL_2801668 | 08/06/21 | North America / Mexico / Nuevo Leon | Human | Male   | 36 | Ambulatory   | Nasopharyngeal and pharyngeal swabs    |
| hCoV-19/Mexico/NLE-IBT_IMSS_1786/2021          | EPI_ISL_2801670 | 08/06/21 | North America / Mexico / Nuevo Leon | Human | Female | 57 | Ambulatory   | Pharyngeal swab                        |
| hCoV-19/Mexico/NLE-IBT_IMSS_1796/2021          | EPI_ISL_2801675 | 07/06/21 | North America / Mexico / Nuevo Leon | Human | Male   | 33 | Ambulatory   | Nasopharyngeal and pharyngeal swabs    |
| hCoV-19/Mexico/NLE-IBT_IMSS_1797/2021          | EPI_ISL_2801676 | 10/06/21 | North America / Mexico / Nuevo Leon | Human | Male   | 84 | Ambulatory   | Nasopharyngeal and pharyngeal swabs    |
| hCoV-19/Mexico/NLE-IBT_IMSS_1800/2021          | EPI_ISL_2801679 | 10/06/21 | North America / Mexico / Nuevo Leon | Human | Female | 53 | Hospitalized | Nasopharyngeal and pharyngeal swabs    |
| hCoV-19/Mexico/NLE-IBT_IMSS_1809/2021          | EPI_ISL_2801685 | 10/06/21 | North America / Mexico / Nuevo Leon | Human | Female | 61 | Hospitalized | Nasopharyngeal and pharyngeal swabs    |
| hCoV-19/Mexico/NLE-IBT_IMSS_1810/2021          | EPI_ISL_2801686 | 10/06/21 | North America / Mexico / Nuevo Leon | Human | Male   | 32 | Ambulatory   | Nasopharyngeal and pharyngeal swabs    |
| hCoV-19/Mexico/NLE-IBT_IMSS_66028-NC/2021      | EPI_ISL_2801687 | 11/06/21 | North America / Mexico / Nuevo Leon | Human | Female | 37 | Ambulatory   | Nasopharyngeal and pharyngeal swabs    |
| hCoV-19/Mexico/NLE-LANGEBIO_IMSS_0829/2021     | EPI_ISL_2671625 | 17/05/21 | North America / Mexico / Nuevo Leon | Human | Female | 49 | Hospitalized | Nasopharyngeal and pharyngeal swabs    |
| hCoV-19/Mexico/NLE-LANGEBIO_IMSS_0833/2021     | EPI_ISL_2671626 | 18/05/21 | North America / Mexico / Nuevo Leon | Human | Female | 49 | Ambulatory   | Nasopharyngeal and pharyngeal swabs    |
| hCoV-19/Mexico/NLE-LANGEBIO_IMSS_0851/2021     | EPI_ISL_2671631 | 20/05/21 | North America / Mexico / Nuevo Leon | Human | Male   | 26 | Ambulatory   | Nasopharyngeal and pharyngeal swabs    |
| hCoV-19/Mexico/NLE-LANGEBIO_IMSS_0857/2021     | EPI_ISL_2671633 | 21/05/21 | North America / Mexico / Nuevo Leon | Human | Female | 21 | Hospitalized | Nasopharyngeal and pharyngeal swabs    |
| hCoV-19/Mexico/NLE-LANGEBIO_IMSS_1355/2021     | EPI_ISL_2942486 | 17/06/21 | North America / Mexico / Nuevo Leon | Human | Male   | 53 | Hospitalized | Nasopharyngeal and pharyngeal swabs    |
| hCoV-19/Mexico/NLE-LANGEBIO_IMSS_1357/2021     | EPI_ISL_2942488 | 17/06/21 | North America / Mexico / Nuevo Leon | Human | Male   | 45 | Ambulatory   | Nasopharyngeal swab                    |
| hCoV-19/Mexico/NLE-LANGEBIO_IMSS_1365/2021     | EPI_ISL_2942496 | 18/06/21 | North America / Mexico / Nuevo Leon | Human | Male   | 53 | Hospitalized | Nasopharyngeal and pharyngeal swabs    |



|                                            |                 |          |                                       |       |        |    |              |                                        |
|--------------------------------------------|-----------------|----------|---------------------------------------|-------|--------|----|--------------|----------------------------------------|
| hCoV-19/Mexico/NLE-LANGEBIO_IMSS_1660/2021 | EPI_ISL_2942757 | 21/06/21 | North America / Mexico / Nuevo Leon   | Human | Female | 21 | Ambulatory   | Nasopharyngeal and pharyngeal swabs    |
| hCoV-19/Mexico/NLE-LANGEBIO_IMSS_1666/2021 | EPI_ISL_2942762 | 28/06/21 | North America / Mexico / Nuevo Leon   | Human | Female | 12 | Ambulatory   | Nasopharyngeal and pharyngeal swabs    |
| hCoV-19/Mexico/NLE-LANGEBIO_IMSS_1680/2021 | EPI_ISL_2942771 | 01/07/21 | North America / Mexico / Nuevo Leon   | Human | Female | 42 | Ambulatory   | Nasopharyngeal and pharyngeal swabs    |
| hCoV-19/Mexico/NLE-LANGEBIO_IMSS_1688/2021 | EPI_ISL_2942778 | 02/07/21 | North America / Mexico / Nuevo Leon   | Human | Male   | 18 | Ambulatory   | Nasopharyngeal and pharyngeal swabs    |
| hCoV-19/Mexico/OAX_INER_IMSS_1120/2021     | EPI_ISL_2490345 | 29/04/21 | North America / Mexico / Oaxaca       | Human | Male   | 37 | Ambulatory   | Nasopharyngeal and oropharyngeal swabs |
| hCoV-19/Mexico/OAX_LANGEBIO_IMSS_0779/2021 | EPI_ISL_2402190 | 20/04/21 | North America / Mexico / Oaxaca       | Human | Male   | 71 | Ambulatory   | Nasopharyngeal and pharyngeal swabs    |
| hCoV-19/Mexico/OAX_LANGEBIO_IMSS_0812/2021 | EPI_ISL_2402222 | 23/04/21 | North America / Mexico / Oaxaca       | Human | Female | 53 | Ambulatory   | Nasopharyngeal and pharyngeal swabs    |
| hCoV-19/Mexico/OAX-IBT_IMSS_1929/2021      | EPI_ISL_2801795 | 31/05/21 | North America / Mexico / Oaxaca       | Human | Female | 38 | Ambulatory   | Nasopharyngeal and pharyngeal swabs    |
| hCoV-19/Mexico/OAX-IBT_IMSS_1980/2021      | EPI_ISL_2801837 | 03/06/21 | North America / Mexico / Oaxaca       | Human | Female | 55 | Ambulatory   | Nasopharyngeal and pharyngeal swabs    |
| hCoV-19/Mexico/OAX-IBT_IMSS_1981/2021      | EPI_ISL_2801838 | 04/06/21 | North America / Mexico / Oaxaca       | Human | Female | 29 | Ambulatory   | Nasopharyngeal and pharyngeal swabs    |
| hCoV-19/Mexico/OAX-LANGEBIO_IMSS_1126/2021 | EPI_ISL_2671639 | 19/05/21 | North America / Mexico / Oaxaca       | Human | Male   | 51 | Ambulatory   | Nasopharyngeal and pharyngeal swabs    |
| hCoV-19/Mexico/PUE_IBT_IMSS_1252/2021      | EPI_ISL_2391628 | 06/05/21 | North America / Mexico / Puebla       | Human | Male   | 72 | Hospitalized | Nasopharyngeal and pharyngeal swabs    |
| hCoV-19/Mexico/PUE_IBT_IMSS_1254/2021      | EPI_ISL_2391580 | 06/05/21 | North America / Mexico / Puebla       | Human | Male   | 35 | Ambulatory   | Nasopharyngeal swab                    |
| hCoV-19/Mexico/PUE_IBT_IMSS_1522/2021      | EPI_ISL_2681162 | 22/05/21 | North America / Mexico / Puebla       | Human | Male   | 38 | Hospitalized | Nasopharyngeal and pharyngeal swabs    |
| hCoV-19/Mexico/PUE_IBT_IMSS_1523/2021      | EPI_ISL_2681191 | 22/05/21 | North America / Mexico / Puebla       | Human | Male   | 45 | Hospitalized | Nasopharyngeal and pharyngeal swabs    |
| hCoV-19/Mexico/PUE_IBT_IMSS_1549/2021      | EPI_ISL_2681347 | 25/05/21 | North America / Mexico / Puebla       | Human | Female | 82 | Hospitalized | Nasopharyngeal and pharyngeal swabs    |
| hCoV-19/Mexico/PUE_IBT_IMSS_1676/2021      | EPI_ISL_2681149 | 01/06/21 | North America / Mexico / Puebla       | Human | Female | 65 | Hospitalized | Nasopharyngeal and pharyngeal swabs    |
| hCoV-19/Mexico/PUE_INER_IMSS_1277/2021     | EPI_ISL_2490350 | 09/05/21 | North America / Mexico / Puebla       | Human | Male   | 71 | Hospitalized | Nasopharyngeal and oropharyngeal swabs |
| hCoV-19/Mexico/PUE_INER_IMSS_1306/2021     | EPI_ISL_2490351 | 10/05/21 | North America / Mexico / Puebla       | Human | Female | 34 | Ambulatory   | Nasopharyngeal swab                    |
| hCoV-19/Mexico/PUE_INER_IMSS_1322/2021     | EPI_ISL_2490352 | 12/05/21 | North America / Mexico / Puebla       | Human | Female | 27 | Ambulatory   | Nasopharyngeal swab                    |
| hCoV-19/Mexico/PUE_INER_IMSS_1323/2021     | EPI_ISL_2490353 | 08/05/21 | North America / Mexico / Puebla       | Human | Female | 43 | Ambulatory   | Nasopharyngeal and oropharyngeal swabs |
| hCoV-19/Mexico/PUE_LANGEBIO_IMSS_0438/2021 | EPI_ISL_1662170 | 23/03/21 | North America / Mexico / Puebla       | Human | Female | 29 | Ambulatory   | Nasopharyngeal swab                    |
| hCoV-19/Mexico/PUE_LANGEBIO_IMSS_0610/2021 | EPI_ISL_2402028 | 17/04/21 | North America / Mexico / Puebla       | Human | Female | 87 | Hospitalized | Nasopharyngeal and pharyngeal swabs    |
| hCoV-19/Mexico/PUE-IBT_IMSS_1889/2021      | EPI_ISL_2801758 | 27/05/21 | North America / Mexico / Puebla       | Human | Male   | 39 | Ambulatory   | Nasopharyngeal and pharyngeal swabs    |
| hCoV-19/Mexico/PUE-IBT_IMSS_1911/2021      | EPI_ISL_2801776 | 31/05/21 | North America / Mexico / Puebla       | Human | Female | 42 | Ambulatory   | Nasopharyngeal and pharyngeal swabs    |
| hCoV-19/Mexico/PUE-IBT_IMSS_1913/2021      | EPI_ISL_2801778 | 29/05/21 | North America / Mexico / Puebla       | Human | Male   | 37 | Hospitalized | Nasopharyngeal and pharyngeal swabs    |
| hCoV-19/Mexico/PUE-IBT_IMSS_1944/2021      | EPI_ISL_2801806 | 03/06/21 | North America / Mexico / Puebla       | Human | Male   | 66 | Hospitalized | Nasopharyngeal and pharyngeal swabs    |
| hCoV-19/Mexico/PUE-IBT_IMSS_2022/2021      | EPI_ISL_2801869 | 06/06/21 | North America / Mexico / Puebla       | Human | Male   | 34 | Ambulatory   | Nasopharyngeal and pharyngeal swabs    |
| hCoV-19/Mexico/PUE-LANGEBIO_IMSS_1091/2021 | EPI_ISL_2671642 | 18/05/21 | North America / Mexico / Puebla       | Human | Female | 73 | Hospitalized | Nasopharyngeal and pharyngeal swabs    |
| hCoV-19/Mexico/PUE-LANGEBIO_IMSS_1093/2021 | EPI_ISL_2671644 | 17/05/21 | North America / Mexico / Puebla       | Human | Male   | 51 | Ambulatory   | Nasopharyngeal and pharyngeal swabs    |
| hCoV-19/Mexico/PUE-LANGEBIO_IMSS_1153/2021 | EPI_ISL_2671652 | 21/05/21 | North America / Mexico / Puebla       | Human | Male   | 46 | Ambulatory   | Nasopharyngeal and pharyngeal swabs    |
| hCoV-19/Mexico/PUE-LANGEBIO_IMSS_1387/2021 | EPI_ISL_2942515 | 11/06/21 | North America / Mexico / Puebla       | Human | Female | 38 | Hospitalized | Nasopharyngeal and pharyngeal swabs    |
| hCoV-19/Mexico/PUE-LANGEBIO_IMSS_1853/2021 | EPI_ISL_2942920 | 01/07/21 | North America / Mexico / Puebla       | Human | Female | 18 | Hospitalized | Nasopharyngeal and pharyngeal swabs    |
| hCoV-19/Mexico/QUE_LANGEBIO_IMSS_0516/2021 | EPI_ISL_2401943 | 19/04/21 | North America / Mexico / Queretaro    | Human | Male   | 62 | Hospitalized | Pharyngeal swab                        |
| hCoV-19/Mexico/QUE_LANGEBIO_IMSS_0810/2021 | EPI_ISL_2402220 | 23/04/21 | North America / Mexico / Queretaro    | Human | Male   | 48 | Ambulatory   | Nasopharyngeal and pharyngeal swabs    |
| hCoV-19/Mexico/QUE_LANGEBIO_IMSS_0811/2021 | EPI_ISL_2402221 | 26/04/21 | North America / Mexico / Queretaro    | Human | Male   | 50 | Hospitalized | Bronchoalveolar lavage                 |
| hCoV-19/Mexico/QUE-IBT_IMSS_1993/2021      | EPI_ISL_2801848 | 08/06/21 | North America / Mexico / Queretaro    | Human | Female | 36 | Ambulatory   | Nasopharyngeal and pharyngeal swabs    |
| hCoV-19/Mexico/QUE-IBT_IMSS_1994/2021      | EPI_ISL_2801849 | 08/06/21 | North America / Mexico / Queretaro    | Human | Female | 53 | Ambulatory   | Nasopharyngeal and pharyngeal swabs    |
| hCoV-19/Mexico/ROO_IBT_IMSS_1716/2021      | EPI_ISL_2681136 | 31/05/21 | North America / Mexico / Quintana Roc | Human | Female | 27 | Ambulatory   | Nasopharyngeal swab                    |
| hCoV-19/Mexico/ROO_IBT_IMSS_1729/2021      | EPI_ISL_2681233 | 28/05/21 | North America / Mexico / Quintana Roc | Human | Female | 50 | Hospitalized | Nasopharyngeal and pharyngeal swabs    |
| hCoV-19/Mexico/ROO_IBT_IMSS_1732/2021      | EPI_ISL_2681050 | 31/05/21 | North America / Mexico / Quintana Roc | Human | Male   | 48 | Ambulatory   | Nasopharyngeal and pharyngeal swabs    |
| hCoV-19/Mexico/ROO_IBT_IMSS_1733/2021      | EPI_ISL_2681133 | 31/05/21 | North America / Mexico / Quintana Roc | Human | Female | 27 | Ambulatory   | Nasopharyngeal and pharyngeal swabs    |
| hCoV-19/Mexico/ROO_IBT_IMSS_1745/2021      | EPI_ISL_2681176 | 30/05/21 | North America / Mexico / Quintana Roc | Human | Male   | 40 | Hospitalized | Nasopharyngeal and pharyngeal swabs    |
| hCoV-19/Mexico/ROO_INER_IMSS_00420/2021    | EPI_ISL_1585428 | 05/03/21 | North America / Mexico / Quintana Roc | Human | Female | 32 | Hospitalized | Nasopharyngeal and oropharyngeal swabs |
| hCoV-19/Mexico/ROO_INER_IMSS_00436/2021    | EPI_ISL_1585444 | 10/03/21 | North America / Mexico / Quintana Roc | Human | Female | 50 | Ambulatory   | Nasopharyngeal and oropharyngeal swabs |
| hCoV-19/Mexico/ROO_INER_IMSS_00771/2021    | EPI_ISL_2091225 | 27/03/21 | North America / Mexico / Quintana Roc | Human | Male   | 37 | Ambulatory   | Nasopharyngeal and oropharyngeal swabs |
| hCoV-19/Mexico/ROO_INER_IMSS_00790/2021    | EPI_ISL_2091243 | 03/04/21 | North America / Mexico / Quintana Roc | Human | Female | 59 | Ambulatory   | Nasopharyngeal and oropharyngeal swabs |
| hCoV-19/Mexico/ROO_INER_IMSS_00791/2021    | EPI_ISL_2091244 | 08/04/21 | North America / Mexico / Quintana Roc | Human | Male   | 57 | Hospitalized | Nasopharyngeal and oropharyngeal swabs |
| hCoV-19/Mexico/ROO_INER_IMSS_00792/2021    | EPI_ISL_2091245 | 08/04/21 | North America / Mexico / Quintana Roc | Human | Female | 42 | Hospitalized | Nasopharyngeal and oropharyngeal swabs |
| hCoV-19/Mexico/ROO_INER_IMSS_1130/2021     | EPI_ISL_2490311 | 05/05/21 | North America / Mexico / Quintana Roc | Human | Male   | 63 | Hospitalized | Nasopharyngeal and oropharyngeal swabs |
| hCoV-19/Mexico/ROO_INER_IMSS_1152/2021     | EPI_ISL_2490330 | 06/05/21 | North America / Mexico / Quintana Roc | Human | Female | 42 | Ambulatory   | Nasopharyngeal and oropharyngeal swabs |
| hCoV-19/Mexico/ROO_INER_IMSS_1162/2021     | EPI_ISL_2490347 | 11/05/21 | North America / Mexico / Quintana Roc | Human | Male   | 43 | Hospitalized | Nasopharyngeal and oropharyngeal swabs |

|                                                           |                 |                                       |                                           |       |                 |        |              |                                        |                    |
|-----------------------------------------------------------|-----------------|---------------------------------------|-------------------------------------------|-------|-----------------|--------|--------------|----------------------------------------|--------------------|
| hCoV-19/Mexico/ROO_LANGEBIO_IMSS_07605-NC/EPI_ISL_2970025 | 17/04/21        | North America / Mexico / Quintana Roc | Human                                     |       | Female          | 45     | Hospitalized | Nasopharyngeal and pharyngeal swabs    |                    |
| hCoV-19/Mexico/ROO-IBT_IMSS_1756/2021                     | EPI_ISL_2801655 | 07/06/21                              | North America / Mexico / Quintana Roc     | Human | Male            | 62     | Hospitalized | Nasopharyngeal and pharyngeal swabs    |                    |
| hCoV-19/Mexico/ROO-IBT_IMSS_1812/2021                     | EPI_ISL_2801577 | 02/06/21                              | North America / Mexico / Quintana Roc     | Human | Male            | 49     | Hospitalized | Nasopharyngeal and pharyngeal swabs    |                    |
| hCoV-19/Mexico/ROO-IBT_IMSS_1825/2021                     | EPI_ISL_2801579 | 02/06/21                              | North America / Mexico / Quintana Roc     | Human | Male            | 37     | Ambulatory   | Nasopharyngeal and pharyngeal swabs    |                    |
| hCoV-19/Mexico/ROO-IBT_IMSS_1947/2021                     | EPI_ISL_2801592 | 03/06/21                              | North America / Mexico / Quintana Roc     | Human | Female          | 25     | Ambulatory   | Nasopharyngeal and pharyngeal swabs    |                    |
| hCoV-19/Mexico/ROO-IBT_IMSS_1969/2021                     | EPI_ISL_2801594 | 03/06/21                              | North America / Mexico / Quintana Roc     | Human | Male            | 56     | Ambulatory   | Nasopharyngeal and pharyngeal swabs    |                    |
| hCoV-19/Mexico/ROO-IBT_IMSS_2068/2021                     | EPI_ISL_2801619 | 04/06/21                              | North America / Mexico / Quintana Roc     | Human | Male            | 28     | Ambulatory   | Nasopharyngeal and pharyngeal swabs    |                    |
| hCoV-19/Mexico/ROO-IBT_IMSS_2093/2021                     | EPI_ISL_2801641 | 07/06/21                              | North America / Mexico / Quintana Roc     | Human | Female          | 45     | Ambulatory   | Nasopharyngeal and pharyngeal swabs    |                    |
| hCoV-19/Mexico/ROO-IBT_IMSS_2106/2021                     | EPI_ISL_2801653 | 05/06/21                              | North America / Mexico / Quintana Roc     | Human | Female          | 37     | Hospitalized | Nasopharyngeal and pharyngeal swabs    |                    |
| hCoV-19/Mexico/ROO-LANGEBIO_IMSS_0900/2021                | EPI_ISL_2671655 | 18/05/21                              | North America / Mexico / Quintana Roc     | Human | Female          | 31     | Ambulatory   | Nasopharyngeal and pharyngeal swabs    |                    |
| hCoV-19/Mexico/ROO-LANGEBIO_IMSS_0907/2021                | EPI_ISL_2671660 | 17/05/21                              | North America / Mexico / Quintana Roc     | Human | Female          | 45     | Ambulatory   | Nasopharyngeal and pharyngeal swabs    |                    |
| hCoV-19/Mexico/ROO-LANGEBIO_IMSS_0926/2021                | EPI_ISL_2671671 | 19/05/21                              | North America / Mexico / Quintana Roc     | Human | Female          | 25     | Ambulatory   | Nasopharyngeal and pharyngeal swabs    |                    |
| hCoV-19/Mexico/ROO-LANGEBIO_IMSS_0928/2021                | EPI_ISL_2671673 | 19/05/21                              | North America / Mexico / Quintana Roc     | Human | Female          | 41     | Ambulatory   | Nasopharyngeal and pharyngeal swabs    |                    |
| hCoV-19/Mexico/ROO-LANGEBIO_IMSS_0937/2021                | EPI_ISL_2671680 | 21/05/21                              | North America / Mexico / Quintana Roc     | Human | Male            | 34     | Ambulatory   | Nasopharyngeal and pharyngeal swabs    |                    |
| hCoV-19/Mexico/ROO-LANGEBIO_IMSS_0939/2021                | EPI_ISL_2671682 | 20/05/21                              | North America / Mexico / Quintana Roc     | Human | Female          | 28     | Hospitalized | Nasopharyngeal and pharyngeal swabs    |                    |
| hCoV-19/Mexico/ROO-LANGEBIO_IMSS_0960/2021                | EPI_ISL_2671690 | 24/05/21                              | North America / Mexico / Quintana Roc     | Human | Male            | 22     | Ambulatory   | Nasopharyngeal and pharyngeal swabs    |                    |
| hCoV-19/Mexico/ROO-LANGEBIO_IMSS_0972/2021                | EPI_ISL_2671696 | 26/05/21                              | North America / Mexico / Quintana Roc     | Human | Male            | 35     | Ambulatory   | Nasopharyngeal and pharyngeal swabs    |                    |
| hCoV-19/Mexico/ROO-LANGEBIO_IMSS_1237/2021                | EPI_ISL_2942398 | 22/06/21                              | North America / Mexico / Quintana Roc     | Human | Male            | 32     | Ambulatory   | Nasopharyngeal and pharyngeal swabs    |                    |
| hCoV-19/Mexico/ROO-LANGEBIO_IMSS_1545/2021                | EPI_ISL_2942656 | 26/06/21                              | North America / Mexico / Quintana Roc     | Human | Female          | 20     | Hospitalized | Nasopharyngeal and pharyngeal swabs    |                    |
| hCoV-19/Mexico/ROO-LANGEBIO_IMSS_1578/2021                | EPI_ISL_2942689 | 27/06/21                              | North America / Mexico / Quintana Roc     | Human | Female          | 37     | Ambulatory   | Nasopharyngeal and pharyngeal swabs    |                    |
| hCoV-19/Mexico/ROO-LANGEBIO_IMSS_1590/2021                | EPI_ISL_2942701 | 28/06/21                              | North America / Mexico / Quintana Roc     | Human | Female          | 52     | Ambulatory   | Nasopharyngeal and pharyngeal swabs    |                    |
| hCoV-19/Mexico/ROO-LANGEBIO_IMSS_1595/2021                | EPI_ISL_2942704 | 29/06/21                              | North America / Mexico / Quintana Roc     | Human | Male            | 26     | Ambulatory   | Nasopharyngeal and pharyngeal swabs    |                    |
| hCoV-19/Mexico/SIN_CIAD-CLN_D0035/2021                    | EPI_ISL_2680920 | 01/06/21                              | North America / Mexico / Sinaloa / Ahorr  | Human | Female          | 42     | unknown      | Oropharyngeal swab                     |                    |
| hCoV-19/Mexico/SIN_CIAD-CLN_D0511/2021                    | EPI_ISL_2927967 | 11/06/21                              | North America / Mexico / Sinaloa / Culiac | Human | Female          | 23     | unknown      | Oropharyngeal swab                     |                    |
| hCoV-19/Mexico/SIN_CIAD-CLN_D0557/2021                    | EPI_ISL_2927968 | 12/06/21                              | North America / Mexico / Sinaloa / Culiac | Human | Female          | 52     | unknown      | Oropharyngeal swab                     |                    |
| hCoV-19/Mexico/SIN_CIAD-CLN_D1476/2021                    | EPI_ISL_2680923 | 30/05/21                              | North America / Mexico / Sinaloa / Culiac | Human | Female          | 49     | unknown      | Oropharyngeal swab                     |                    |
| hCoV-19/Mexico/SIN_CIAD-CLN_D1477/2021                    | EPI_ISL_2680924 | 30/05/21                              | North America / Mexico / Sinaloa / Culiac | Human | Female          | 54     | unknown      | Oropharyngeal swab                     |                    |
| hCoV-19/Mexico/SIN_CIAD-CLN_D1511/2021                    | EPI_ISL_2680927 | 31/05/21                              | North America / Mexico / Sinaloa / Culiac | Human | Female          | 77     | unknown      | Oropharyngeal swab                     |                    |
| hCoV-19/Mexico/SIN_CIAD-CLN_F0851/2021                    | EPI_ISL_2533936 | 19/05/21                              | North America / Mexico / Sinaloa          | Human | Other: Ahome    | Male   | 46           | unknown                                | Oropharyngeal swab |
| hCoV-19/Mexico/SIN_CIAD-CLN_F0854/2021                    | EPI_ISL_2680928 | 03/06/21                              | North America / Mexico / Sinaloa / Ahorr  | Human | Female          | 52     | unknown      | Oropharyngeal swab                     |                    |
| hCoV-19/Mexico/SIN_CIAD-CLN_S0600/2021                    | EPI_ISL_2927971 | 21/06/21                              | North America / Mexico / Sinaloa / Culiac | Human | Male            | 22     | unknown      | Oropharyngeal swab                     |                    |
| hCoV-19/Mexico/SIN_CIAD-MZT_HJ1711/2021                   | EPI_ISL_2533917 | 26/05/21                              | North America / Mexico / Sinaloa          | Human | Other: Mazatlan | Female | 59           | unknown                                | Oropharyngeal swab |
| hCoV-19/Mexico/SIN_CIAD-MZT_HJ1739/2021                   | EPI_ISL_2680932 | 02/06/21                              | North America / Mexico / Sinaloa / Mazatl | Human | Male            | 49     | Ambulatory   | Oropharyngeal swab                     |                    |
| hCoV-19/Mexico/SIN_CIAD-MZT_HJ1742/2021                   | EPI_ISL_2680933 | 02/06/21                              | North America / Mexico / Sinaloa / Mazatl | Human | Male            | 41     | Ambulatory   | Oropharyngeal swab                     |                    |
| hCoV-19/Mexico/SIN_CIAD-MZT_HJ1755/2021                   | EPI_ISL_2680936 | 04/06/21                              | North America / Mexico / Sinaloa / Mazatl | Human | Female          | 38     | Ambulatory   | Oropharyngeal swab                     |                    |
| hCoV-19/Mexico/SIN_CIAD-MZT_HJ1757/2021                   | EPI_ISL_2894554 | 04/06/21                              | North America / Mexico / Sinaloa / Mazatl | Human | Female          | 43     | Ambulatory   | Oropharyngeal swab                     |                    |
| hCoV-19/Mexico/SIN_CIAD-MZT_HJ1776/2021                   | EPI_ISL_2894557 | 07/06/21                              | North America / Mexico / Sinaloa / Mazatl | Human | Male            | 31     | Ambulatory   | Oropharyngeal swab                     |                    |
| hCoV-19/Mexico/SIN_CIAD-MZT_HJ1782/2021                   | EPI_ISL_2894558 | 09/06/21                              | North America / Mexico / Sinaloa / Mazatl | Human | Male            | 25     | Ambulatory   | Oropharyngeal swab                     |                    |
| hCoV-19/Mexico/SIN_CIAD-MZT_HJ1922/2021                   | EPI_ISL_2927976 | 23/06/21                              | North America / Mexico / Sinaloa / Mazatl | Human | Female          | 54     | unknown      | Oropharyngeal swab                     |                    |
| hCoV-19/Mexico/SIN_CIAD-MZT_ID2430/2021                   | EPI_ISL_2533913 | 15/05/21                              | North America / Mexico / Sinaloa          | Human | Other: Mazatlan | Male   | 63           | unknown                                | Oropharyngeal swab |
| hCoV-19/Mexico/SIN_CIAD-MZT_ID2531/2021                   | EPI_ISL_2533918 | 27/05/21                              | North America / Mexico / Sinaloa          | Human | Other: Mazatlan | Male   | 43           | unknown                                | Oropharyngeal swab |
| hCoV-19/Mexico/SIN_CIAD-MZT_ID2728/2021                   | EPI_ISL_2927972 | 21/06/21                              | North America / Mexico / Sinaloa / Mazatl | Human | Male            | 14     | unknown      | Oropharyngeal swab                     |                    |
| hCoV-19/Mexico/SIN_CIAD-MZT_S6810/2021                    | EPI_ISL_2533914 | 16/05/21                              | North America / Mexico / Sinaloa          | Human | Other: Mazatlan | Male   | 37           | unknown                                | Oropharyngeal swab |
| hCoV-19/Mexico/SIN_CIAD-MZT_S6840/2021                    | EPI_ISL_2533915 | 20/05/21                              | North America / Mexico / Sinaloa          | Human | Other: Mazatlan | Male   | 37           | unknown                                | Oropharyngeal swab |
| hCoV-19/Mexico/SIN_CIAD-MZT_S6867/2021                    | EPI_ISL_2533916 | 21/05/21                              | North America / Mexico / Sinaloa          | Human | Other: Mazatlan | Male   | 37           | unknown                                | Oropharyngeal swab |
| hCoV-19/Mexico/SIN_CIAD-MZT_S6921/2021                    | EPI_ISL_2533919 | 28/05/21                              | North America / Mexico / Sinaloa          | Human | Other: Mazatlan | Male   | 31           | unknown                                | Oropharyngeal swab |
| hCoV-19/Mexico/SIN_CIAD-MZT_S7016/2021                    | EPI_ISL_2680938 | 05/06/21                              | North America / Mexico / Sinaloa / Mazatl | Human | Male            | 33     | Ambulatory   | Oropharyngeal swab                     |                    |
| hCoV-19/Mexico/SIN_CIAD-MZT_S7028/2021                    | EPI_ISL_2680941 | 05/06/21                              | North America / Mexico / Sinaloa / Mazatl | Human | Male            | 31     | Ambulatory   | Oropharyngeal swab                     |                    |
| hCoV-19/Mexico/SIN_CIAD-MZT_S7158/2021                    | EPI_ISL_2927974 | 22/06/21                              | North America / Mexico / Sinaloa / Mazatl | Human | Male            | 39     | unknown      | Oropharyngeal swab                     |                    |
| hCoV-19/Mexico/SIN_INER_IMSS_1180/2021                    | EPI_ISL_2490331 | 10/05/21                              | North America / Mexico / Sinaloa          | Human | Male            | 43     | Hospitalized | Nasopharyngeal and oropharyngeal swabs |                    |
| hCoV-19/Mexico/SIN-CIAD-CLN_D0174/2021                    | EPI_ISL_2987687 | 03/06/21                              | North America / Mexico / Sinaloa / Guasa  | Human | Female          | 52     | unknown      | Oropharyngeal swab                     |                    |
| hCoV-19/Mexico/SIN-CIAD-CLN_F0865/2021                    | EPI_ISL_2987694 | 25/06/21                              | North America / Mexico / Sinaloa / Ahorr  | Human | Male            | 33     | unknown      | Oropharyngeal swab                     |                    |

|                                                |                 |          |                                              |       |        |    |              |                                        |
|------------------------------------------------|-----------------|----------|----------------------------------------------|-------|--------|----|--------------|----------------------------------------|
| hCoV-19/Mexico/SIN-CIAD-MZT_HJ1803/2021        | EPI_ISL_2987696 | 15/06/21 | North America / Mexico / Sinaloa / Mazatlán  | Human | Female | 26 | unknown      | Oropharyngeal swab                     |
| hCoV-19/Mexico/SIN-CIAD-MZT_S7079/2021         | EPI_ISL_2987713 | 11/06/21 | North America / Mexico / Sinaloa / Mazatlán  | Human | Male   | 21 | unknown      | Oropharyngeal swab                     |
| hCoV-19/Mexico/SIN-CIAD-MZT_S7103/2021         | EPI_ISL_2987717 | 14/06/21 | North America / Mexico / Sinaloa / Mazatlán  | Human | Female | 52 | unknown      | Oropharyngeal swab                     |
| hCoV-19/Mexico/SIN-CIAD-MZT_S7104/2021         | EPI_ISL_2987718 | 14/06/21 | North America / Mexico / Sinaloa / Mazatlán  | Human | Female | 47 | unknown      | Oropharyngeal swab                     |
| hCoV-19/Mexico/SIN-CIAD-MZT_S7130/2021         | EPI_ISL_2987721 | 18/06/21 | North America / Mexico / Sinaloa / Mazatlán  | Human | Male   | 57 | unknown      | Oropharyngeal swab                     |
| hCoV-19/Mexico/SIN-IBT_IMSS_1832/2021          | EPI_ISL_2801707 | 29/05/21 | North America / Mexico / Sinaloa             | Human | Male   | 90 | Hospitalized | Nasopharyngeal and pharyngeal swabs    |
| hCoV-19/Mexico/SIN-IBT_IMSS_1871/2021          | EPI_ISL_2801739 | 07/06/21 | North America / Mexico / Sinaloa             | Human | Female | 44 | Hospitalized | Nasopharyngeal and pharyngeal swabs    |
| hCoV-19/Mexico/SIN-IBT_IMSS_1879/2021          | EPI_ISL_2801745 | 08/06/21 | North America / Mexico / Sinaloa             | Human | Female | 17 | Ambulatory   | Nasopharyngeal and pharyngeal swabs    |
| hCoV-19/Mexico/SIN-LANGEBIO_IMSS_1269/2021     | EPI_ISL_2942427 | 15/06/21 | North America / Mexico / Sinaloa             | Human | Male   | 38 | Hospitalized | Nasopharyngeal and pharyngeal swabs    |
| hCoV-19/Mexico/SIN-LANGEBIO_IMSS_1277/2021     | EPI_ISL_2942433 | 17/06/21 | North America / Mexico / Sinaloa             | Human | Male   | 71 | Hospitalized | Nasopharyngeal and pharyngeal swabs    |
| hCoV-19/Mexico/SIN-LANGEBIO_IMSS_1291/2021     | EPI_ISL_2942444 | 22/06/21 | North America / Mexico / Sinaloa             | Human | Female | 52 | Ambulatory   | Nasopharyngeal and pharyngeal swabs    |
| hCoV-19/Mexico/SIN-LANGEBIO_IMSS_1293/2021     | EPI_ISL_2942445 | 22/06/21 | North America / Mexico / Sinaloa             | Human | Male   | 43 | Ambulatory   | Nasopharyngeal and pharyngeal swabs    |
| hCoV-19/Mexico/SIN-LANGEBIO_IMSS_1305/2021     | EPI_ISL_2942455 | 22/06/21 | North America / Mexico / Sinaloa             | Human | Female | 20 | Ambulatory   | Nasopharyngeal and pharyngeal swabs    |
| hCoV-19/Mexico/SLP_IBT_IMSS_1474/2021          | EPI_ISL_2681212 | 27/05/21 | North America / Mexico / San Luis Potosí     | Human | Male   | 77 | Hospitalized | Nasopharyngeal and pharyngeal swabs    |
| hCoV-19/Mexico/SLP-IBT_IMSS_1823/2021          | EPI_ISL_2801699 | 06/06/21 | North America / Mexico / San Luis Potosí     | Human | Male   | 19 | Ambulatory   | Nasopharyngeal and pharyngeal swabs    |
| hCoV-19/Mexico/SLP-IBT_IMSS_1824/2021          | EPI_ISL_2801700 | 07/06/21 | North America / Mexico / San Luis Potosí     | Human | Female | 48 | Hospitalized | Nasopharyngeal and pharyngeal swabs    |
| hCoV-19/Mexico/SLP-IBT_IMSS_1830/2021          | EPI_ISL_2801705 | 10/06/21 | North America / Mexico / San Luis Potosí     | Human | Female | 40 | Ambulatory   | Nasopharyngeal and pharyngeal swabs    |
| hCoV-19/Mexico/SLP-LANGEBIO_IMSS_0974/2021     | EPI_ISL_2671700 | 13/05/21 | North America / Mexico / San Luis Potosí     | Human | Male   | 31 | Hospitalized | Nasopharyngeal and pharyngeal swabs    |
| hCoV-19/Mexico/SLP-LANGEBIO_IMSS_1326/2021     | EPI_ISL_2942471 | 15/06/21 | North America / Mexico / San Luis Potosí     | Human | Male   | 40 | Ambulatory   | Nasopharyngeal and pharyngeal swabs    |
| hCoV-19/Mexico/SLP-LANGEBIO_IMSS_1327/2021     | EPI_ISL_2942472 | 16/06/21 | North America / Mexico / San Luis Potosí     | Human | Male   | 46 | Hospitalized | Nasopharyngeal and pharyngeal swabs    |
| hCoV-19/Mexico/SLP-LANGEBIO_IMSS_1333/2021     | EPI_ISL_2942476 | 24/06/21 | North America / Mexico / San Luis Potosí     | Human | Female | 40 | Ambulatory   | Nasopharyngeal and pharyngeal swabs    |
| hCoV-19/Mexico/SLP-LANGEBIO_IMSS_1334/2021     | EPI_ISL_2942477 | 24/06/21 | North America / Mexico / San Luis Potosí     | Human | Female | 45 | Hospitalized | Nasopharyngeal and pharyngeal swabs    |
| hCoV-19/Mexico/SON_CIAD-HMO_16010/2021         | EPI_ISL_2927979 | 15/06/21 | North America / Mexico / Sonora / Hermosillo | Human | Female | 49 | unknown      | Oropharyngeal swab                     |
| hCoV-19/Mexico/SON_CIAD-HMO_16011/2021         | EPI_ISL_2927980 | 15/06/21 | North America / Mexico / Sonora / Hermosillo | Human | Male   | 24 | unknown      | Oropharyngeal swab                     |
| hCoV-19/Mexico/SON_CIAD-HMO_2555/2021          | EPI_ISL_2894566 | 04/06/21 | North America / Mexico / Sonora / Hermosillo | Human | Female | 8  | Ambulatory   | Oropharyngeal swab                     |
| hCoV-19/Mexico/SON_CIAD-HMO_2613/2021          | EPI_ISL_2894569 | 11/06/21 | North America / Mexico / Sonora / Hermosillo | Human | Female | 39 | Ambulatory   | Oropharyngeal swab                     |
| hCoV-19/Mexico/SON-IBT_IMSS_1840/2021          | EPI_ISL_2801715 | 30/05/21 | North America / Mexico / Sonora              | Human | Female | 44 | Hospitalized | Nasopharyngeal and pharyngeal swabs    |
| hCoV-19/Mexico/SON-LANGEBIO_IMSS_1288/2021     | EPI_ISL_2942442 | 21/06/21 | North America / Mexico / Sonora              | Human | Male   | 32 | Hospitalized | Nasopharyngeal swab                    |
| hCoV-19/Mexico/SON-LANGEBIO_IMSS_1289/2021     | EPI_ISL_2942443 | 20/06/21 | North America / Mexico / Sonora              | Human | Female | 26 | Hospitalized | Nasopharyngeal and pharyngeal swabs    |
| hCoV-19/Mexico/TAB_IBT_IMSS_10132-NC/2021      | EPI_ISL_2681374 | 31/05/21 | North America / Mexico / Tabasco             | Human | Male   | 66 | Hospitalized | Nasopharyngeal and pharyngeal swabs    |
| hCoV-19/Mexico/TAB_IBT_IMSS_1351/2021          | EPI_ISL_2391728 | 12/04/21 | North America / Mexico / Tabasco             | Human | Female | 26 | Ambulatory   | Nasopharyngeal and pharyngeal swabs    |
| hCoV-19/Mexico/TAB_INER_IMSS_1105/2021         | EPI_ISL_2490343 | 28/04/21 | North America / Mexico / Tabasco             | Human | Female | 57 | Hospitalized | Nasopharyngeal and oropharyngeal swabs |
| hCoV-19/Mexico/TAB_INER_IMSS_1124/2021         | EPI_ISL_2490346 | 02/05/21 | North America / Mexico / Tabasco             | Human | Female | 30 | Hospitalized | Nasopharyngeal and oropharyngeal swabs |
| hCoV-19/Mexico/TAB_LANGEBIO_IMSS_0647/2021     | EPI_ISL_2402064 | 25/04/21 | North America / Mexico / Tabasco             | Human | Female | 63 | Ambulatory   | Nasopharyngeal and pharyngeal swabs    |
| hCoV-19/Mexico/TAB_LANGEBIO_IMSS_09609-NC/2021 | EPI_ISL_2970045 | 22/05/21 | North America / Mexico / Tabasco             | Human | Male   | 53 | Ambulatory   | Nasopharyngeal and pharyngeal swabs    |
| hCoV-19/Mexico/TAB-LANGEBIO_IMSS_0911/2021     | EPI_ISL_2671705 | 19/05/21 | North America / Mexico / Tabasco             | Human | Male   | 43 | Hospitalized | Nasopharyngeal and pharyngeal swabs    |
| hCoV-19/Mexico/TAB-LANGEBIO_IMSS_1519/2021     | EPI_ISL_2942632 | 23/06/21 | North America / Mexico / Tabasco             | Human | Male   | 67 | Hospitalized | Nasopharyngeal and pharyngeal swabs    |
| hCoV-19/Mexico/TAB-LANGEBIO_IMSS_1539/2021     | EPI_ISL_2942650 | 24/06/21 | North America / Mexico / Tabasco             | Human | Female | 33 | Ambulatory   | Nasopharyngeal and pharyngeal swabs    |
| hCoV-19/Mexico/TAM_IBT_IMSS_1373/2021          | EPI_ISL_2391732 | 06/04/21 | North America / Mexico / Tamaulipas          | Human | Male   | 23 | Ambulatory   | Nasopharyngeal and pharyngeal swabs    |
| hCoV-19/Mexico/TAM_LANGEBIO_IMSS_0049/2021     | EPI_ISL_1351540 | 03/03/21 | North America / Mexico / Jalisco             | Human | Male   | 57 | Hospitalized | Nasopharyngeal and pharyngeal swabs    |
| hCoV-19/Mexico/TAM_LANGEBIO_IMSS_38905-NC/2021 | EPI_ISL_2970048 | 02/03/21 | North America / Mexico / Tamaulipas          | Human | Female | 24 | Ambulatory   | Nasopharyngeal and pharyngeal swabs    |
| hCoV-19/Mexico/TAM_LANGEBIO_IMSS_67638-NC/2021 | EPI_ISL_2970051 | 20/06/21 | North America / Mexico / Tamaulipas          | Human | Male   | 35 | Ambulatory   | Nasopharyngeal and pharyngeal swabs    |
| hCoV-19/Mexico/TAM-IBT_IMSS_1792/2021          | EPI_ISL_2801673 | 08/06/21 | North America / Mexico / Tamaulipas          | Human | Male   | 44 | Ambulatory   | Nasopharyngeal and pharyngeal swabs    |
| hCoV-19/Mexico/TAM-LANGEBIO_IMSS_0849/2021     | EPI_ISL_2671717 | 18/05/21 | North America / Mexico / Tamaulipas          | Human | Male   | 65 | Ambulatory   | Nasopharyngeal and pharyngeal swabs    |
| hCoV-19/Mexico/TAM-LANGEBIO_IMSS_0854/2021     | EPI_ISL_2671718 | 19/05/21 | North America / Mexico / Tamaulipas          | Human | Male   | 60 | Ambulatory   | Nasopharyngeal and pharyngeal swabs    |
| hCoV-19/Mexico/TAM-LANGEBIO_IMSS_0884/2021     | EPI_ISL_2671722 | 25/05/21 | North America / Mexico / Tamaulipas          | Human | Female | 58 | Ambulatory   | Nasopharyngeal and pharyngeal swabs    |
| hCoV-19/Mexico/TAM-LANGEBIO_IMSS_1368/2021     | EPI_ISL_2942498 | 16/06/21 | North America / Mexico / Tamaulipas          | Human | Male   | 31 | Ambulatory   | Nasopharyngeal and pharyngeal swabs    |
| hCoV-19/Mexico/TAM-LANGEBIO_IMSS_1375/2021     | EPI_ISL_2942504 | 21/06/21 | North America / Mexico / Tamaulipas          | Human | Male   | 52 | Ambulatory   | Nasopharyngeal and pharyngeal swabs    |
| hCoV-19/Mexico/TAM-LANGEBIO_IMSS_1671/2021     | EPI_ISL_2942764 | 26/06/21 | North America / Mexico / Tamaulipas          | Human | Female | 53 | Ambulatory   | Nasopharyngeal and pharyngeal swabs    |
| hCoV-19/Mexico/TLA-LANGEBIO_IMSS_1065/2021     | EPI_ISL_2671723 | 17/05/21 | North America / Mexico / Tlaxcala            | Human | Male   | 22 | Ambulatory   | Nasopharyngeal and pharyngeal swabs    |
| hCoV-19/Mexico/VER_IBT_IMSS_1010/2021          | EPI_ISL_1811518 | 08/04/21 | North America / Mexico / Veracruz            | Human | Male   | 49 | Hospitalized | Nasopharyngeal and oropharyngeal swabs |
| hCoV-19/Mexico/VER_IBT_IMSS_1146/2021          | EPI_ISL_2391570 | 22/04/21 | North America / Mexico / Veracruz            | Human | Female | 28 | Ambulatory   | Nasopharyngeal and pharyngeal swabs    |



|                                             |                 |          |                                    |       |        |    |              |                                        |
|---------------------------------------------|-----------------|----------|------------------------------------|-------|--------|----|--------------|----------------------------------------|
| hCoV-19/Mexico/VER_IBT_IMSS_1214/2021       | EPI_ISL_2391651 | 29/04/21 | North America / Mexico / Veracruz  | Human | Male   | 54 | Ambulatory   | Nasopharyngeal and pharyngeal swabs    |
| hCoV-19/Mexico/VER_IBT_IMSS_1326/2021       | EPI_ISL_2391668 | 28/04/21 | North America / Mexico / Veracruz  | Human | Female | 21 | Ambulatory   | Nasopharyngeal and pharyngeal swabs    |
| hCoV-19/Mexico/VER_IBT_IMSS_1330/2021       | EPI_ISL_2391554 | 28/04/21 | North America / Mexico / Veracruz  | Human | Male   | 41 | Ambulatory   | Nasopharyngeal and pharyngeal swabs    |
| hCoV-19/Mexico/VER_IBT_IMSS_1331/2021       | EPI_ISL_2391555 | 29/04/21 | North America / Mexico / Veracruz  | Human | Female | 65 | Ambulatory   | Nasopharyngeal and pharyngeal swabs    |
| hCoV-19/Mexico/VER_IBT_IMSS_1333/2021       | EPI_ISL_2391694 | 27/04/21 | North America / Mexico / Veracruz  | Human | Male   | 68 | Hospitalized | Nasopharyngeal and pharyngeal swabs    |
| hCoV-19/Mexico/VER_IBT_IMSS_1650/2021       | EPI_ISL_2681350 | 30/05/21 | North America / Mexico / Veracruz  | Human | Female | 46 | Hospitalized | Nasopharyngeal and pharyngeal swabs    |
| hCoV-19/Mexico/VER_IBT_IMSS_1663/2021       | EPI_ISL_2681147 | 28/05/21 | North America / Mexico / Veracruz  | Human | Male   | 55 | Ambulatory   | Nasopharyngeal and pharyngeal swabs    |
| hCoV-19/Mexico/VER_IBT_IMSS_1664/2021       | EPI_ISL_2681180 | 30/05/21 | North America / Mexico / Veracruz  | Human | Female | 54 | Ambulatory   | Nasopharyngeal and pharyngeal swabs    |
| hCoV-19/Mexico/VER_INER_IMSS_00966/2021     | EPI_ISL_2091407 | 14/04/21 | North America / Mexico / Veracruz  | Human | Male   | 68 | Hospitalized | Nasopharyngeal and oropharyngeal swabs |
| hCoV-19/Mexico/VER_LANGEBIO_IMSS_0428/2021  | EPI_ISL_1662210 | 23/03/21 | North America / Mexico / Veracruz  | Human | Male   | 43 | Ambulatory   | Nasopharyngeal swab                    |
| hCoV-19/Mexico/VER_LANGEBIO_IMSS_11722-NC/z | EPI_ISL_2970055 | 18/05/21 | North America / Mexico / Veracruz  | Human | Male   | 55 | Hospitalized | Nasopharyngeal and pharyngeal swabs    |
| hCoV-19/Mexico/VER-IBT_IMSS_1892/2021       | EPI_ISL_2801760 | 30/05/21 | North America / Mexico / Veracruz  | Human | Female | 70 | Ambulatory   | Nasopharyngeal and pharyngeal swabs    |
| hCoV-19/Mexico/VER-IBT_IMSS_1923/2021       | EPI_ISL_2801788 | 01/06/21 | North America / Mexico / Veracruz  | Human | Female | 59 | Hospitalized | Nasopharyngeal and pharyngeal swabs    |
| hCoV-19/Mexico/VER-IBT_IMSS_1983/2021       | EPI_ISL_2801841 | 04/06/21 | North America / Mexico / Veracruz  | Human | Male   | 28 | Ambulatory   | Nasopharyngeal and pharyngeal swabs    |
| hCoV-19/Mexico/VER-IBT_IMSS_1990/2021       | EPI_ISL_2801847 | 04/06/21 | North America / Mexico / Veracruz  | Human | Female | 44 | Ambulatory   | Nasopharyngeal and pharyngeal swabs    |
| hCoV-19/Mexico/VER-IBT_IMSS_1998/2021       | EPI_ISL_2801851 | 06/06/21 | North America / Mexico / Veracruz  | Human | Female | 48 | Ambulatory   | Nasopharyngeal and pharyngeal swabs    |
| hCoV-19/Mexico/VER-IBT_IMSS_2043/2021       | EPI_ISL_2801887 | 08/06/21 | North America / Mexico / Veracruz  | Human | Female | 57 | Ambulatory   | Nasopharyngeal and pharyngeal swabs    |
| hCoV-19/Mexico/VER-LANGEBIO_IMSS_1103/2021  | EPI_ISL_2671737 | 18/05/21 | North America / Mexico / Veracruz  | Human | Male   | 38 | Hospitalized | Nasopharyngeal and pharyngeal swabs    |
| hCoV-19/Mexico/VER-LANGEBIO_IMSS_1105/2021  | EPI_ISL_2671739 | 18/05/21 | North America / Mexico / Veracruz  | Human | Female | 38 | Ambulatory   | Nasopharyngeal and pharyngeal swabs    |
| hCoV-19/Mexico/VER-LANGEBIO_IMSS_1134/2021  | EPI_ISL_2671744 | 20/05/21 | North America / Mexico / Veracruz  | Human | Male   | 39 | Ambulatory   | Nasopharyngeal and pharyngeal swabs    |
| hCoV-19/Mexico/VER-LANGEBIO_IMSS_1424/2021  | EPI_ISL_2942548 | 18/06/21 | North America / Mexico / Veracruz  | Human | Male   | 42 | Ambulatory   | Nasopharyngeal and pharyngeal swabs    |
| hCoV-19/Mexico/VER-LANGEBIO_IMSS_1426/2021  | EPI_ISL_2942550 | 20/06/21 | North America / Mexico / Veracruz  | Human | Male   | 40 | Ambulatory   | Nasopharyngeal swab                    |
| hCoV-19/Mexico/VER-LANGEBIO_IMSS_1428/2021  | EPI_ISL_2942551 | 18/06/21 | North America / Mexico / Veracruz  | Human | Female | 41 | Ambulatory   | Nasopharyngeal and pharyngeal swabs    |
| hCoV-19/Mexico/VER-LANGEBIO_IMSS_1750/2021  | EPI_ISL_2942831 | 24/06/21 | North America / Mexico / Veracruz  | Human | Male   | 33 | Ambulatory   | Nasopharyngeal and pharyngeal swabs    |
| hCoV-19/Mexico/YUC_IBT_IMSS_10287-NC/2021   | EPI_ISL_2681375 | 03/06/21 | North America / Mexico / Yucatan   | Human | Male   | 26 | Ambulatory   | Nasopharyngeal and pharyngeal swabs    |
| hCoV-19/Mexico/YUC_IBT_IMSS_1346/2021       | EPI_ISL_2391720 | 01/04/21 | North America / Mexico / Yucatan   | Human | Female | 57 | Hospitalized | Nasopharyngeal swab                    |
| hCoV-19/Mexico/YUC_IBT_IMSS_1727/2021       | EPI_ISL_2681108 | 01/06/21 | North America / Mexico / Yucatan   | Human | Male   | 39 | Ambulatory   | Nasopharyngeal and pharyngeal swabs    |
| hCoV-19/Mexico/YUC_IBT_IMSS_1748/2021       | EPI_ISL_2681328 | 04/06/21 | North America / Mexico / Yucatan   | Human | Male   | 23 | Ambulatory   | Nasopharyngeal and pharyngeal swabs    |
| hCoV-19/Mexico/YUC_INER_IMSS_00782/2021     | EPI_ISL_2091236 | 08/04/21 | North America / Mexico / Yucatan   | Human | Male   | 31 | Ambulatory   | Nasopharyngeal and oropharyngeal swabs |
| hCoV-19/Mexico/YUC_INER_IMSS_1108/2021      | EPI_ISL_2490344 | 29/04/21 | North America / Mexico / Yucatan   | Human | Male   | 37 | Ambulatory   | Nasopharyngeal and oropharyngeal swabs |
| hCoV-19/Mexico/YUC_LANGEBIO_IMSS_0596/2021  | EPI_ISL_2402015 | 15/04/21 | North America / Mexico / Yucatan   | Human | Female | 39 | Ambulatory   | Nasopharyngeal and pharyngeal swabs    |
| hCoV-19/Mexico/YUC-IBT_IMSS_1845/2021       | EPI_ISL_2801564 | 04/06/21 | North America / Mexico / Yucatan   | Human | Female | 62 | Hospitalized | Nasopharyngeal and pharyngeal swabs    |
| hCoV-19/Mexico/YUC-IBT_IMSS_2008/2021       | EPI_ISL_2801598 | 05/06/21 | North America / Mexico / Yucatan   | Human | Female | 64 | Hospitalized | Nasopharyngeal swab                    |
| hCoV-19/Mexico/YUC-IBT_IMSS_2027/2021       | EPI_ISL_2801600 | 05/06/21 | North America / Mexico / Yucatan   | Human | Male   | 70 | Hospitalized | Nasopharyngeal swab                    |
| hCoV-19/Mexico/YUC-IBT_IMSS_2048/2021       | EPI_ISL_2801601 | 05/06/21 | North America / Mexico / Yucatan   | Human | Female | 56 | Hospitalized | Nasopharyngeal and pharyngeal swabs    |
| hCoV-19/Mexico/YUC-IBT_IMSS_2049/2021       | EPI_ISL_2801602 | 06/06/21 | North America / Mexico / Yucatan   | Human | Male   | 90 | Hospitalized | Nasopharyngeal and pharyngeal swabs    |
| hCoV-19/Mexico/YUC-LANGEBIO_IMSS_0942/2021  | EPI_ISL_2671750 | 24/05/21 | North America / Mexico / Yucatan   | Human | Male   | 26 | Ambulatory   | Nasopharyngeal and pharyngeal swabs    |
| hCoV-19/Mexico/YUC-LANGEBIO_IMSS_0964/2021  | EPI_ISL_2671754 | 26/05/21 | North America / Mexico / Yucatan   | Human | Male   | 45 | Ambulatory   | Nasopharyngeal and pharyngeal swabs    |
| hCoV-19/Mexico/YUC-LANGEBIO_IMSS_1240/2021  | EPI_ISL_2942401 | 23/06/21 | North America / Mexico / Yucatan   | Human | Male   | 35 | Ambulatory   | Nasopharyngeal and pharyngeal swabs    |
| hCoV-19/Mexico/YUC-LANGEBIO_IMSS_1245/2021  | EPI_ISL_2942406 | 24/06/21 | North America / Mexico / Yucatan   | Human | Male   | 53 | Ambulatory   | Nasopharyngeal swab                    |
| hCoV-19/Mexico/YUC-LANGEBIO_IMSS_1562/2021  | EPI_ISL_2942673 | 28/06/21 | North America / Mexico / Yucatan   | Human | Male   | 20 | Ambulatory   | Nasopharyngeal and pharyngeal swabs    |
| hCoV-19/Mexico/YUC-LANGEBIO_IMSS_1586/2021  | EPI_ISL_2942697 | 30/06/21 | North America / Mexico / Yucatan   | Human | Female | 23 | Ambulatory   | Nasopharyngeal swab                    |
| hCoV-19/Mexico/ZAC_IBT_IMSS_1462/2021       | EPI_ISL_2681120 | 25/05/21 | North America / Mexico / Zacatecas | Human | Male   | 63 | Ambulatory   | Nasopharyngeal and pharyngeal swabs    |
| hCoV-19/Mexico/ZAC_IBT_IMSS_1470/2021       | EPI_ISL_2681121 | 26/05/21 | North America / Mexico / Zacatecas | Human | Female | 20 | Ambulatory   | Nasopharyngeal and pharyngeal swabs    |
| hCoV-19/Mexico/ZAC_IBT_IMSS_1472/2021       | EPI_ISL_2681092 | 28/05/21 | North America / Mexico / Zacatecas | Human | Male   | 45 | Ambulatory   | Nasopharyngeal and pharyngeal swabs    |
| hCoV-19/Mexico/ZAC_IBT_IMSS_1480/2021       | EPI_ISL_2681142 | 31/05/21 | North America / Mexico / Zacatecas | Human | Female | 22 | Ambulatory   | Nasopharyngeal and pharyngeal swabs    |
| hCoV-19/Mexico/ZAC_IBT_IMSS_1483/2021       | EPI_ISL_2681190 | 31/05/21 | North America / Mexico / Zacatecas | Human | Female | 78 | Ambulatory   | Nasopharyngeal and pharyngeal swabs    |
| hCoV-19/Mexico/ZAC_INER_IMSS_1210/2021      | EPI_ISL_2835939 | 07/05/21 | North America / Mexico / Zacatecas | Human | Female | 45 | Ambulatory   | Nasopharyngeal and oropharyngeal swabs |
| hCoV-19/Mexico/ZAC_INER_IMSS_1217/2021      | EPI_ISL_2835941 | 08/05/21 | North America / Mexico / Zacatecas | Human | Female | 20 | Ambulatory   | Nasopharyngeal and oropharyngeal swabs |
| hCoV-19/Mexico/ZAC_INER_IMSS_1225/2021      | EPI_ISL_2835942 | 11/05/21 | North America / Mexico / Zacatecas | Human | Male   | 45 | Ambulatory   | Nasopharyngeal and oropharyngeal swabs |
| hCoV-19/Mexico/ZAC_INER_IMSS_1230/2021      | EPI_ISL_2490333 | 12/05/21 | North America / Mexico / Zacatecas | Human | Female | 33 | Ambulatory   | Nasopharyngeal and oropharyngeal swabs |
| hCoV-19/Mexico/ZAC_INER_IMSS_1235/2021      | EPI_ISL_2835943 | 07/05/21 | North America / Mexico / Zacatecas | Human | Male   | 39 | Ambulatory   | Nasopharyngeal and oropharyngeal swabs |

|                                             |                 |          |                                          |       |        |    |              |                                        |
|---------------------------------------------|-----------------|----------|------------------------------------------|-------|--------|----|--------------|----------------------------------------|
| hCoV-19/Mexico/ZAC_INER_IMSS_1237/2021      | EPI_ISL_2490348 | 13/05/21 | North America / Mexico / Zacatecas       | Human | Female | 33 | Ambulatory   | Nasopharyngeal and oropharyngeal swabs |
| hCoV-19/Mexico/ZAC_INER_IMSS_1244/2021      | EPI_ISL_2835945 | 15/05/21 | North America / Mexico / Zacatecas       | Human | Male   | 24 | Ambulatory   | Nasopharyngeal and oropharyngeal swabs |
| hCoV-19/Mexico/ZAC_LANGEBIO_IMSS_0301/2021  | EPI_ISL_1662226 | 28/03/21 | North America / Mexico / Zacatecas       | Human | Male   | 39 | Ambulatory   | Nasopharyngeal swab                    |
| hCoV-19/Mexico/ZAC_LANGEBIO_IMSS_0305/2021  | EPI_ISL_1662230 | 30/03/21 | North America / Mexico / Zacatecas       | Human | Female | 55 | Ambulatory   | Nasopharyngeal swab                    |
| hCoV-19/Mexico/ZAC_LANGEBIO_IMSS_0704/2021  | EPI_ISL_2402118 | 29/04/21 | North America / Mexico / Zacatecas       | Human | Female | 50 | Hospitalized | Nasopharyngeal and pharyngeal swabs    |
| hCoV-19/Mexico/ZAC-IBT_IMSS_11154-NC/2021   | EPI_ISL_2801703 | 09/06/21 | North America / Mexico / Zacatecas       | Human | Female | 19 | Ambulatory   | Nasopharyngeal and pharyngeal swabs    |
| hCoV-19/Mexico/ZAC-IBT_IMSS_1821/2021       | EPI_ISL_2801697 | 06/06/21 | North America / Mexico / Zacatecas       | Human | Female | 36 | Ambulatory   | Nasopharyngeal and pharyngeal swabs    |
| hCoV-19/Mexico/ZAC-IBT_IMSS_1826/2021       | EPI_ISL_2801701 | 08/06/21 | North America / Mexico / Zacatecas       | Human | Male   | 29 | Ambulatory   | Nasopharyngeal and pharyngeal swabs    |
| hCoV-19/Mexico/ZAC-IBT_IMSS_1827/2021       | EPI_ISL_2801702 | 08/06/21 | North America / Mexico / Zacatecas       | Human | Male   | 47 | Ambulatory   | Nasopharyngeal and pharyngeal swabs    |
| hCoV-19/Mexico/ZAC-IBT_IMSS_1831/2021       | EPI_ISL_2801706 | 13/06/21 | North America / Mexico / Zacatecas       | Human | Male   | 47 | Hospitalized | Nasopharyngeal and pharyngeal swabs    |
| hCoV-19/Mexico/ZAC-LANGEBIO_IMSS_0977/2021  | EPI_ISL_2671760 | 17/05/21 | North America / Mexico / Zacatecas       | Human | Female | 52 | Ambulatory   | Nasopharyngeal and pharyngeal swabs    |
| hCoV-19/Mexico/ZAC-INER-IMSS-00023/2021     | EPI_ISL_1287761 | 10/02/21 | North America / Mexico / Zacatecas       | Human | Female | 59 | Ambulatory   | Nasopharyngeal and oropharyngeal swabs |
| hCoV-19/Mexico/ZAC-INER-IMSS-00026/2021     | EPI_ISL_1279265 | 11/02/21 | North America / Mexico / Zacatecas       | Human | Female | 39 | Ambulatory   | Nasopharyngeal and oropharyngeal swabs |
| hCoV-19/Mexico/ZAC-INER-IMSS-00050/2021     | EPI_ISL_1287762 | 14/02/21 | North America / Mexico / Zacatecas       | Human | Female | 92 | Ambulatory   | Nasopharyngeal and oropharyngeal swabs |
| hCoV-19/Mexico/ZAC-INER-IMSS-00059/2021     | EPI_ISL_1287763 | 15/02/21 | North America / Mexico / Zacatecas       | Human | Male   | 41 | Ambulatory   | Nasopharyngeal and oropharyngeal swabs |
| hCoV-19/Mexico/ZAC-INER-IMSS-00078/2021     | EPI_ISL_1287764 | 16/02/21 | North America / Mexico / Zacatecas       | Human | Female | 66 | Ambulatory   | Nasopharyngeal and oropharyngeal swabs |
| hCoV-19/Mexico/ZAC-INER-IMSS-00079/2021     | EPI_ISL_1287765 | 16/02/21 | North America / Mexico / Zacatecas       | Human | Male   | 53 | Ambulatory   | Nasopharyngeal and oropharyngeal swabs |
| hCoV-19/Mexico/ZAC-INER-IMSS-00086/2021     | EPI_ISL_1287767 | 17/02/21 | North America / Mexico / Zacatecas       | Human | Female | 38 | Ambulatory   | Nasopharyngeal and oropharyngeal swabs |
| hCoV-19/Mexico/BCN-CICESE-M1409/2021        | EPI_ISL_2455241 | 29/04/21 | North America / Mexico / Baja California | Human | Male   | 68 | unknown      | Oropharyngeal swab                     |
| hCoV-19/Mexico/BCN-CICESE-M1411/2021        | EPI_ISL_2455242 | 30/04/21 | North America / Mexico / Baja California | Human | Female | 35 | unknown      | Oropharyngeal swab                     |
| hCoV-19/Mexico/BCN-InDRE_FB13738_S1741/2021 | EPI_ISL_2101880 | 19/04/21 | North America / Mexico / Baja California | Human | Female | 93 | Deceased     | Oropharyngeal swab                     |
| hCoV-19/Mexico/BCN-InDRE_FB16371_S2477/2021 | EPI_ISL_2455998 | 17/05/21 | North America / Mexico / Baja California | Human | Female | 67 | unknown      | Oropharyngeal swab                     |
| hCoV-19/Mexico/BCN-InDRE_FB16375_S2478/2021 | EPI_ISL_2455999 | 19/05/21 | North America / Mexico / Baja California | Human | Female | 28 | unknown      | Oropharyngeal swab                     |
| hCoV-19/Mexico/BCN-InDRE_FB16376_S2479/2021 | EPI_ISL_2456000 | 18/05/21 | North America / Mexico / Baja California | Human | Female | 67 | unknown      | Oropharyngeal swab                     |
| hCoV-19/Mexico/BCN-InDRE_FB17815_S4114/2021 | EPI_ISL_2920685 | 11/06/21 | North America / Mexico / Baja California | Human | Female | 19 | Hospitalized | Oropharyngeal swab                     |
| hCoV-19/Mexico/BCN-InDRE_FB18286_S3966/2021 | EPI_ISL_2858980 | 18/06/21 | North America / Mexico / Baja California | Human | Male   | 38 | Hospitalized | Oropharyngeal swab                     |
| hCoV-19/Mexico/BCN-InDRE_FB19191_S4500/2021 | EPI_ISL_3033354 | 28/06/21 | North America / Mexico / Baja California | Human | Female | 32 | Hospitalized | Oropharyngeal swab                     |
| hCoV-19/Mexico/BCS-InDRE_FB17119_S3086/2021 | EPI_ISL_2663353 | 01/06/21 | North America / Mexico / Baja California | Human | Female | 35 | Hospitalized | Oropharyngeal swab                     |
| hCoV-19/Mexico/BCS-InDRE_FB19249_S4501/2021 | EPI_ISL_3033355 | 21/06/21 | North America / Mexico / Baja California | Human | Female | 49 | Hospitalized | Oropharyngeal swab                     |
| hCoV-19/Mexico/BCS-InDRE_FB19255_S4502/2021 | EPI_ISL_3033356 | 23/06/21 | North America / Mexico / Baja California | Human | Male   | 71 | Hospitalized | Oropharyngeal swab                     |
| hCoV-19/Mexico/CAM-InDRE_FB14881_S2388/2021 | EPI_ISL_2455913 | 10/05/21 | North America / Mexico / Campeche        | Human | Female | 9  | unknown      | Oropharyngeal swab                     |
| hCoV-19/Mexico/CAM-InDRE_FB14886_S2047/2021 | EPI_ISL_2283689 | 05/05/21 | North America / Mexico / Campeche        | Human | Male   | 24 | Hospitalized | Oropharyngeal swab                     |
| hCoV-19/Mexico/CAM-InDRE_FB17371_S3924/2021 | EPI_ISL_2858938 | 09/06/21 | North America / Mexico / Campeche        | Human | Male   | 65 | Hospitalized | Oropharyngeal swab                     |
| hCoV-19/Mexico/CAM-InDRE_FB17391_S3486/2021 | EPI_ISL_2779001 | 02/06/21 | North America / Mexico / Campeche        | Human | Male   | 63 | Hospitalized | Oropharyngeal swab                     |
| hCoV-19/Mexico/CAM-InDRE_FB18927_S4478/2021 | EPI_ISL_3033332 | 16/06/21 | North America / Mexico / Campeche        | Human | Female | 60 | Hospitalized | Oropharyngeal swab                     |
| hCoV-19/Mexico/CAM-InDRE_FB18929_S4479/2021 | EPI_ISL_3033333 | 18/06/21 | North America / Mexico / Campeche        | Human | Female | 60 | Hospitalized | Oropharyngeal swab                     |
| hCoV-19/Mexico/CAM-InDRE_FB18939_S4480/2021 | EPI_ISL_3033334 | 25/06/21 | North America / Mexico / Campeche        | Human | Female | 31 | Hospitalized | Oropharyngeal swab                     |
| hCoV-19/Mexico/CHH-InDRE_F11326_S902/2021   | EPI_ISL_1423512 | 02/03/21 | North America / Mexico / Chihuahua       | Human | Male   | 41 | Hospitalized | Oropharyngeal swab                     |
| hCoV-19/Mexico/CHH-InDRE_F11642_S896/2021   | EPI_ISL_1423506 | 08/03/21 | North America / Mexico / Chihuahua       | Human | Male   | 81 | Hospitalized | Oropharyngeal swab                     |
| hCoV-19/Mexico/CHH-InDRE_F11646_S897/2021   | EPI_ISL_1423507 | 07/03/21 | North America / Mexico / Chihuahua       | Human | Female | 54 | Hospitalized | Oropharyngeal swab                     |
| hCoV-19/Mexico/CHH-InDRE_F11654_S898/2021   | EPI_ISL_1423508 | 09/03/21 | North America / Mexico / Chihuahua       | Human | Female | 47 | Hospitalized | Oropharyngeal swab                     |
| hCoV-19/Mexico/CHH-InDRE_F11656_S899/2021   | EPI_ISL_1423509 | 08/03/21 | North America / Mexico / Chihuahua       | Human | Male   | 60 | Hospitalized | Oropharyngeal swab                     |
| hCoV-19/Mexico/CHH-InDRE_F12155_S1187/2021  | EPI_ISL_1626794 | 12/03/21 | North America / Mexico / Chihuahua       | Human | Male   | 63 | Hospitalized | Oropharyngeal swab                     |
| hCoV-19/Mexico/CHH-InDRE_F12156_S1188/2021  | EPI_ISL_1626795 | 15/03/21 | North America / Mexico / Chihuahua       | Human | Female | 82 | Hospitalized | Oropharyngeal swab                     |
| hCoV-19/Mexico/CHH-InDRE_F12158_S1189/2021  | EPI_ISL_1626796 | 17/03/21 | North America / Mexico / Chihuahua       | Human | Female | 54 | Hospitalized | Oropharyngeal swab                     |
| hCoV-19/Mexico/CHH-InDRE_F12160_S1190/2021  | EPI_ISL_1626797 | 17/03/21 | North America / Mexico / Chihuahua       | Human | Female | 40 | Hospitalized | Oropharyngeal swab                     |
| hCoV-19/Mexico/CHH-InDRE_F12161_S1191/2021  | EPI_ISL_1626798 | 17/03/21 | North America / Mexico / Chihuahua       | Human | Female | 48 | unknown      | Oropharyngeal swab                     |
| hCoV-19/Mexico/CHH-InDRE_F12165_S1192/2021  | EPI_ISL_1626799 | 17/03/21 | North America / Mexico / Chihuahua       | Human | Male   | 59 | Hospitalized | Oropharyngeal swab                     |
| hCoV-19/Mexico/CHH-InDRE_F12168_S1193/2021  | EPI_ISL_1626800 | 17/03/21 | North America / Mexico / Chihuahua       | Human | Female | 41 | Hospitalized | Oropharyngeal swab                     |
| hCoV-19/Mexico/CHH-InDRE_F12169_S1194/2021  | EPI_ISL_1626801 | 17/03/21 | North America / Mexico / Chihuahua       | Human | Female | 68 | Hospitalized | Oropharyngeal swab                     |
| hCoV-19/Mexico/CHH-InDRE_F12356_S1196/2021  | EPI_ISL_1626803 | 22/03/21 | North America / Mexico / Chihuahua       | Human | Male   | 59 | Hospitalized | Oropharyngeal swab                     |
| hCoV-19/Mexico/CHH-InDRE_F12359_S1197/2021  | EPI_ISL_1626804 | 22/03/21 | North America / Mexico / Chihuahua       | Human | Male   | 40 | Hospitalized | Oropharyngeal swab                     |

|                                             |                 |          |                                    |       |        |    |              |                    |
|---------------------------------------------|-----------------|----------|------------------------------------|-------|--------|----|--------------|--------------------|
| hCoV-19/Mexico/CHH-InDRE_F12366_S1198/2021  | EPI_ISL_1626805 | 23/03/21 | North America / Mexico / Chihuahua | Human | Male   | 38 | Hospitalized | Oropharyngeal swab |
| hCoV-19/Mexico/CHH-InDRE_FB12868_S1488/2021 | EPI_ISL_1805466 | 30/03/21 | North America / Mexico / Chihuahua | Human | Female | 19 | Hospitalized | Oropharyngeal swab |
| hCoV-19/Mexico/CHH-InDRE_FB12871_S1489/2021 | EPI_ISL_1805467 | 02/04/21 | North America / Mexico / Chihuahua | Human | Female | 41 | Hospitalized | Oropharyngeal swab |
| hCoV-19/Mexico/CHH-InDRE_FB12877_S1490/2021 | EPI_ISL_1805468 | 04/04/21 | North America / Mexico / Chihuahua | Human | Male   | 22 | Hospitalized | Oropharyngeal swab |
| hCoV-19/Mexico/CHH-InDRE_FB12878_S1491/2021 | EPI_ISL_1805469 | 02/04/21 | North America / Mexico / Chihuahua | Human | Male   | 37 | Hospitalized | Oropharyngeal swab |
| hCoV-19/Mexico/CHH-InDRE_FB13242_S1496/2021 | EPI_ISL_1805474 | 05/04/21 | North America / Mexico / Chihuahua | Human | Female | 70 | Hospitalized | Oropharyngeal swab |
| hCoV-19/Mexico/CHH-InDRE_FB13243_S1497/2021 | EPI_ISL_1805475 | 05/04/21 | North America / Mexico / Chihuahua | Human | Male   | 49 | Hospitalized | Oropharyngeal swab |
| hCoV-19/Mexico/CHH-InDRE_FB13246_S1498/2021 | EPI_ISL_1805476 | 06/04/21 | North America / Mexico / Chihuahua | Human | Female | 44 | unknown      | Oropharyngeal swab |
| hCoV-19/Mexico/CHH-InDRE_FB13247_S1499/2021 | EPI_ISL_1805477 | 06/04/21 | North America / Mexico / Chihuahua | Human | Male   | 30 | Hospitalized | Oropharyngeal swab |
| hCoV-19/Mexico/CHH-InDRE_FB13252_S1500/2021 | EPI_ISL_1805478 | 09/04/21 | North America / Mexico / Chihuahua | Human | Male   | 68 | unknown      | Oropharyngeal swab |
| hCoV-19/Mexico/CHH-InDRE_FB13253_S1501/2021 | EPI_ISL_1805479 | 09/04/21 | North America / Mexico / Chihuahua | Human | Male   | 73 | unknown      | Oropharyngeal swab |
| hCoV-19/Mexico/CHH-InDRE_FB13662_S1732/2021 | EPI_ISL_2101871 | 13/04/21 | North America / Mexico / Chihuahua | Human | Female | 29 | Hospitalized | Oropharyngeal swab |
| hCoV-19/Mexico/CHH-InDRE_FB13663_S1733/2021 | EPI_ISL_2101872 | 13/04/21 | North America / Mexico / Chihuahua | Human | Male   | 45 | Hospitalized | Oropharyngeal swab |
| hCoV-19/Mexico/CHH-InDRE_FB13668_S1734/2021 | EPI_ISL_2101873 | 14/04/21 | North America / Mexico / Chihuahua | Human | Female | 57 | Hospitalized | Oropharyngeal swab |
| hCoV-19/Mexico/CHH-InDRE_FB13671_S1735/2021 | EPI_ISL_2101874 | 14/04/21 | North America / Mexico / Chihuahua | Human | Female | 46 | unknown      | Oropharyngeal swab |
| hCoV-19/Mexico/CHH-InDRE_FB13672_S1736/2021 | EPI_ISL_2101875 | 14/04/21 | North America / Mexico / Chihuahua | Human | Female | 24 | Hospitalized | Oropharyngeal swab |
| hCoV-19/Mexico/CHH-InDRE_FB13678_S1751/2021 | EPI_ISL_2101890 | 16/04/21 | North America / Mexico / Chihuahua | Human | Female | 27 | Hospitalized | Oropharyngeal swab |
| hCoV-19/Mexico/CHH-InDRE_FB13679_S1737/2021 | EPI_ISL_2101876 | 18/04/21 | North America / Mexico / Chihuahua | Human | Female | 64 | Hospitalized | Oropharyngeal swab |
| hCoV-19/Mexico/CHH-InDRE_FB13688_S1738/2021 | EPI_ISL_2101877 | 08/04/21 | North America / Mexico / Chihuahua | Human | Female | 27 | Hospitalized | Oropharyngeal swab |
| hCoV-19/Mexico/CHH-InDRE_FB13702_S1739/2021 | EPI_ISL_2101878 | 15/04/21 | North America / Mexico / Chihuahua | Human | Female | 31 | unknown      | Oropharyngeal swab |
| hCoV-19/Mexico/CHH-InDRE_FB13814_S1742/2021 | EPI_ISL_2101881 | 20/04/21 | North America / Mexico / Chihuahua | Human | Female | 42 | Hospitalized | Oropharyngeal swab |
| hCoV-19/Mexico/CHH-InDRE_FB13819_S1743/2021 | EPI_ISL_2101882 | 21/04/21 | North America / Mexico / Chihuahua | Human | Female | 55 | Hospitalized | Oropharyngeal swab |
| hCoV-19/Mexico/CHH-InDRE_FB13820_S1744/2021 | EPI_ISL_2101883 | 21/04/21 | North America / Mexico / Chihuahua | Human | Female | 28 | Hospitalized | Oropharyngeal swab |
| hCoV-19/Mexico/CHH-InDRE_FB13822_S1745/2021 | EPI_ISL_2101884 | 20/04/21 | North America / Mexico / Chihuahua | Human | Female | 78 | Hospitalized | Oropharyngeal swab |
| hCoV-19/Mexico/CHH-InDRE_FB13825_S1746/2021 | EPI_ISL_2101885 | 21/04/21 | North America / Mexico / Chihuahua | Human | Female | 65 | Hospitalized | Oropharyngeal swab |
| hCoV-19/Mexico/CHH-InDRE_FB13827_S1747/2021 | EPI_ISL_2101886 | 21/04/21 | North America / Mexico / Chihuahua | Human | Male   | 16 | Hospitalized | Oropharyngeal swab |
| hCoV-19/Mexico/CHH-InDRE_FB13832_S1748/2021 | EPI_ISL_2101887 | 21/04/21 | North America / Mexico / Chihuahua | Human | Male   | 85 | Hospitalized | Oropharyngeal swab |
| hCoV-19/Mexico/CHH-InDRE_FB13835_S1749/2021 | EPI_ISL_2101888 | 22/04/21 | North America / Mexico / Chihuahua | Human | Female | 53 | Hospitalized | Oropharyngeal swab |
| hCoV-19/Mexico/CHH-InDRE_FB13840_S1750/2021 | EPI_ISL_2101889 | 20/04/21 | North America / Mexico / Chihuahua | Human | Female | 48 | unknown      | Oropharyngeal swab |
| hCoV-19/Mexico/CHH-InDRE_FB14222_S1764/2021 | EPI_ISL_2101903 | 26/04/21 | North America / Mexico / Chihuahua | Human | Male   | 77 | unknown      | Oropharyngeal swab |
| hCoV-19/Mexico/CHH-InDRE_FB14223_S1765/2021 | EPI_ISL_2101904 | 26/04/21 | North America / Mexico / Chihuahua | Human | Female | 55 | unknown      | Oropharyngeal swab |
| hCoV-19/Mexico/CHH-InDRE_FB14877_S2086/2021 | EPI_ISL_2283725 | 05/04/21 | North America / Mexico / Chihuahua | Human | Male   | 24 | Hospitalized | Oropharyngeal swab |
| hCoV-19/Mexico/CHH-InDRE_FB14878_S2389/2021 | EPI_ISL_2455914 | 05/05/21 | North America / Mexico / Chihuahua | Human | Female | 24 | Hospitalized | Oropharyngeal swab |
| hCoV-19/Mexico/CHH-InDRE_FB14879_S2392/2021 | EPI_ISL_2455917 | 07/05/21 | North America / Mexico / Chihuahua | Human | Male   | 33 | Hospitalized | Oropharyngeal swab |
| hCoV-19/Mexico/CHH-InDRE_FB14880_S2401/2021 | EPI_ISL_2455926 | 09/05/21 | North America / Mexico / Chihuahua | Human | Female | 53 | unknown      | Oropharyngeal swab |
| hCoV-19/Mexico/CHH-InDRE_FB14901_S2402/2021 | EPI_ISL_2455927 | 05/05/21 | North America / Mexico / Chihuahua | Human | Female | 62 | Hospitalized | Oropharyngeal swab |
| hCoV-19/Mexico/CHH-InDRE_FB14906_S2403/2021 | EPI_ISL_2455928 | 05/05/21 | North America / Mexico / Chihuahua | Human | Male   | 40 | Hospitalized | Oropharyngeal swab |
| hCoV-19/Mexico/CHH-InDRE_FB14908_S2404/2021 | EPI_ISL_2484164 | 05/05/21 | North America / Mexico / Chihuahua | Human | Male   | 45 | Hospitalized | Oropharyngeal swab |
| hCoV-19/Mexico/CHH-InDRE_FB14909_S2405/2021 | EPI_ISL_2455929 | 05/05/21 | North America / Mexico / Chihuahua | Human | Female | 58 | Hospitalized | Oropharyngeal swab |
| hCoV-19/Mexico/CHH-InDRE_FB14913_S2390/2021 | EPI_ISL_2455915 | 05/05/21 | North America / Mexico / Chihuahua | Human | Female | 32 | Hospitalized | Oropharyngeal swab |
| hCoV-19/Mexico/CHH-InDRE_FB14915_S2049/2021 | EPI_ISL_2283691 | 02/05/21 | North America / Mexico / Chihuahua | Human | Female | 58 | Hospitalized | Oropharyngeal swab |
| hCoV-19/Mexico/CHH-InDRE_FB14918_S2050/2021 | EPI_ISL_2283692 | 05/05/21 | North America / Mexico / Chihuahua | Human | Male   | 80 | Deceased     | Oropharyngeal swab |
| hCoV-19/Mexico/CHH-InDRE_FB15893_S2394/2021 | EPI_ISL_2533762 | 11/05/21 | North America / Mexico / Chihuahua | Human | Male   | 49 | Hospitalized | Oropharyngeal swab |
| hCoV-19/Mexico/CHH-InDRE_FB15895_S2395/2021 | EPI_ISL_2455920 | 13/05/21 | North America / Mexico / Chihuahua | Human | Female | 22 | Hospitalized | Oropharyngeal swab |
| hCoV-19/Mexico/CHH-InDRE_FB16251_S2733/2021 | EPI_ISL_2533759 | 18/05/21 | North America / Mexico / Chihuahua | Human | Male   | 17 | Hospitalized | Oropharyngeal swab |
| hCoV-19/Mexico/CHH-InDRE_FB16252_S2734/2021 | EPI_ISL_2533760 | 18/05/21 | North America / Mexico / Chihuahua | Human | Male   | 49 | Hospitalized | Oropharyngeal swab |
| hCoV-19/Mexico/CHH-InDRE_FB16254_S2735/2021 | EPI_ISL_2533761 | 18/05/21 | North America / Mexico / Chihuahua | Human | Male   | 49 | Hospitalized | Oropharyngeal swab |
| hCoV-19/Mexico/CHH-InDRE_FB16255_S2736/2021 | EPI_ISL_2533762 | 19/05/21 | North America / Mexico / Chihuahua | Human | Male   | 18 | Hospitalized | Oropharyngeal swab |
| hCoV-19/Mexico/CHH-InDRE_FB16972_S3127/2021 | EPI_ISL_2663394 | 25/05/21 | North America / Mexico / Chihuahua | Human | Male   | 59 | Hospitalized | Oropharyngeal swab |
| hCoV-19/Mexico/CHH-InDRE_FB16976_S3128/2021 | EPI_ISL_2663395 | 28/05/21 | North America / Mexico / Chihuahua | Human | Male   | 38 | Hospitalized | Oropharyngeal swab |
| hCoV-19/Mexico/CHH-InDRE_FB16978_S3129/2021 | EPI_ISL_2663396 | 29/05/21 | North America / Mexico / Chihuahua | Human | Male   | 53 | Hospitalized | Oropharyngeal swab |
| hCoV-19/Mexico/CHH-InDRE_FB16984_S3130/2021 | EPI_ISL_2663397 | 04/06/21 | North America / Mexico / Chihuahua | Human | Male   | 24 | Hospitalized | Oropharyngeal swab |



|                                               |                 |          |                                      |       |        |    |              |                    |
|-----------------------------------------------|-----------------|----------|--------------------------------------|-------|--------|----|--------------|--------------------|
| hCoV-19/Mexico/CHH-InDRE_FB16985_S3131/2021   | EPI_ISL_2663398 | 05/06/21 | North America / Mexico / Chihuahua   | Human | Male   | 58 | Deceased     | Oropharyngeal swab |
| hCoV-19/Mexico/CHH-InDRE_FB16989_S3940/2021   | EPI_ISL_2858954 | 26/05/21 | North America / Mexico / Chihuahua   | Human | Male   | 43 | Hospitalized | Oropharyngeal swab |
| hCoV-19/Mexico/CHH-InDRE_FB16992_S3941/2021   | EPI_ISL_2858955 | 31/05/21 | North America / Mexico / Chihuahua   | Human | Female | 47 | Hospitalized | Oropharyngeal swab |
| hCoV-19/Mexico/CHH-InDRE_FB16993_S3942/2021   | EPI_ISL_2858956 | 29/05/21 | North America / Mexico / Chihuahua   | Human | Female | 49 | Hospitalized | Oropharyngeal swab |
| hCoV-19/Mexico/CHH-InDRE_FB17409_S3925/2021   | EPI_ISL_2858939 | 10/06/21 | North America / Mexico / Chihuahua   | Human | Male   | 41 | Hospitalized | Oropharyngeal swab |
| hCoV-19/Mexico/CHH-InDRE_FB17410_S3926/2021   | EPI_ISL_2858940 | 11/06/21 | North America / Mexico / Chihuahua   | Human | Male   | 63 | Hospitalized | Oropharyngeal swab |
| hCoV-19/Mexico/CHH-InDRE_FB18221_S4131/2021   | EPI_ISL_2920702 | 11/06/21 | North America / Mexico / Chihuahua   | Human | Female | 38 | Hospitalized | Oropharyngeal swab |
| hCoV-19/Mexico/CHH-InDRE_FB18222_S4132/2021   | EPI_ISL_2920703 | 09/06/21 | North America / Mexico / Chihuahua   | Human | Female | 36 | Hospitalized | Oropharyngeal swab |
| hCoV-19/Mexico/CHH-InDRE_FB18224_S4133/2021   | EPI_ISL_2920704 | 16/06/21 | North America / Mexico / Chihuahua   | Human | Male   | 69 | Hospitalized | Oropharyngeal swab |
| hCoV-19/Mexico/CHH-InDRE_FB18225_S3965/2021   | EPI_ISL_2858979 | 11/06/21 | North America / Mexico / Chihuahua   | Human | Male   | 59 | Hospitalized | Oropharyngeal swab |
| hCoV-19/Mexico/CHH-INMEGEN-InDRE-04-04-126/20 | EPI_ISL_1628624 | 05/04/21 | North America / Mexico / Chihuahua   | Human | Male   | 58 | unknown      | Oropharyngeal swab |
| hCoV-19/Mexico/CHH-InDRE_FB17387_S3482/2021   | EPI_ISL_2778997 | 09/06/21 | North America / Mexico / Chiapas     | Human | Male   | 29 | Hospitalized | Oropharyngeal swab |
| hCoV-19/Mexico/CMX-InDRE_F12295_S1200/2021    | EPI_ISL_1626807 | 20/03/21 | North America / Mexico / Mexico City | Human | Female | 41 | unknown      | Oropharyngeal swab |
| hCoV-19/Mexico/CMX-InDRE_F34543_S900/2021     | EPI_ISL_1423510 | 21/03/21 | North America / Mexico / Mexico City | Human | Female | 30 | Hospitalized | Oropharyngeal swab |
| hCoV-19/Mexico/CMX-InDRE_FB13260_S1502/2021   | EPI_ISL_1805480 | 10/04/21 | North America / Mexico / Mexico City | Human | Female | 56 | Hospitalized | Oropharyngeal swab |
| hCoV-19/Mexico/CMX-InDRE_FB16175_S2435/2021   | EPI_ISL_2455959 | 20/05/21 | North America / Mexico / Mexico City | Human | Female | 51 | Hospitalized | Oropharyngeal swab |
| hCoV-19/Mexico/CMX-InDRE_FB16521_S3061/2021   | EPI_ISL_2663328 | 25/05/21 | North America / Mexico / Mexico City | Human | Male   | 38 | Hospitalized | Oropharyngeal swab |
| hCoV-19/Mexico/CMX-InDRE_FB16522_S3062/2021   | EPI_ISL_2663329 | 25/05/21 | North America / Mexico / Mexico City | Human | Female | 17 | Hospitalized | Oropharyngeal swab |
| hCoV-19/Mexico/CMX-InDRE_FB16523_S3063/2021   | EPI_ISL_2663330 | 31/05/21 | North America / Mexico / Mexico City | Human | Female | 40 | Hospitalized | Oropharyngeal swab |
| hCoV-19/Mexico/CMX-InDRE_FB16969_S3126/2021   | EPI_ISL_2663393 | 07/06/21 | North America / Mexico / Mexico City | Human | Male   | 21 | Hospitalized | Oropharyngeal swab |
| hCoV-19/Mexico/CMX-InDRE_FB17954_S3934/2021   | EPI_ISL_2858948 | 08/06/21 | North America / Mexico / Mexico City | Human | Male   | 63 | Hospitalized | Oropharyngeal swab |
| hCoV-19/Mexico/CMX-InDRE_FB17958_S3935/2021   | EPI_ISL_2858949 | 24/05/21 | North America / Mexico / Mexico City | Human | Female | 13 | Hospitalized | Oropharyngeal swab |
| hCoV-19/Mexico/CMX-InDRE_FB17960_S3936/2021   | EPI_ISL_2858950 | 26/05/21 | North America / Mexico / Mexico City | Human | Female | 58 | Hospitalized | Oropharyngeal swab |
| hCoV-19/Mexico/CMX-InDRE_FB17970_S3937/2021   | EPI_ISL_2858951 | 07/06/21 | North America / Mexico / Mexico City | Human | Female | 71 | Hospitalized | Oropharyngeal swab |
| hCoV-19/Mexico/CMX-InDRE_FB19386_S4507/2021   | EPI_ISL_3033361 | 14/06/21 | North America / Mexico / Mexico City | Human | Female | 68 | Hospitalized | Oropharyngeal swab |
| hCoV-19/Mexico/CMX-InDRE_FB19393_S4508/2021   | EPI_ISL_3046076 | 17/06/21 | North America / Mexico / Mexico City | Human | Male   | 41 | Hospitalized | Oropharyngeal swab |
| hCoV-19/Mexico/CMX-InDRE_FB19400_S4509/2021   | EPI_ISL_3033362 | 18/06/21 | North America / Mexico / Mexico City | Human | Female | 47 | Hospitalized | Oropharyngeal swab |
| hCoV-19/Mexico/CMX-InDRE_FD45086_S1508/2021   | EPI_ISL_1805486 | 06/04/21 | North America / Mexico / Mexico City | Human | Female | 29 | Hospitalized | Oropharyngeal swab |
| hCoV-19/Mexico/CMX-InDRE_FD49735_S1767/2021   | EPI_ISL_2101906 | 12/04/21 | North America / Mexico / Mexico City | Human | Female | 32 | Hospitalized | Oropharyngeal swab |
| hCoV-19/Mexico/CMX-InDRE_FD54664_S1768/2021   | EPI_ISL_2101907 | 20/04/21 | North America / Mexico / Mexico City | Human | Male   | 36 | Hospitalized | Oropharyngeal swab |
| hCoV-19/Mexico/CMX-InDRE_FD54888_S1769/2021   | EPI_ISL_2101908 | 19/04/21 | North America / Mexico / Mexico City | Human | Female | 59 | Hospitalized | Oropharyngeal swab |
| hCoV-19/Mexico/CMX-InDRE_FD55350_S1770/2021   | EPI_ISL_2101909 | 22/04/21 | North America / Mexico / Mexico City | Human | Male   | 49 | Hospitalized | Oropharyngeal swab |
| hCoV-19/Mexico/CMX-InDRE_FD57542_S1771/2021   | EPI_ISL_2101910 | 26/04/21 | North America / Mexico / Mexico City | Human | Female | 53 | Hospitalized | Oropharyngeal swab |
| hCoV-19/Mexico/CMX-InDRE_FD58317_S1772/2021   | EPI_ISL_2101911 | 27/04/21 | North America / Mexico / Mexico City | Human | Male   | 15 | Hospitalized | Oropharyngeal swab |
| hCoV-19/Mexico/CMX-InDRE_FD58467_S1773/2021   | EPI_ISL_2101912 | 27/04/21 | North America / Mexico / Mexico City | Human | Male   | 46 | Hospitalized | Oropharyngeal swab |
| hCoV-19/Mexico/CMX-InDRE_FD63274_S2065/2021   | EPI_ISL_2283705 | 05/05/21 | North America / Mexico / Mexico City | Human | Female | 45 | Hospitalized | Oropharyngeal swab |
| hCoV-19/Mexico/CMX-InDRE_FD63747_S2064/2021   | EPI_ISL_2283704 | 11/03/21 | North America / Mexico / Mexico City | Human | Male   | 53 | Hospitalized | Oropharyngeal swab |
| hCoV-19/Mexico/CMX-InDRE_FD63907_S2067/2021   | EPI_ISL_2283707 | 07/05/21 | North America / Mexico / Mexico City | Human | Female | 39 | Hospitalized | Oropharyngeal swab |
| hCoV-19/Mexico/CMX-InDRE_FD64062_S2068/2021   | EPI_ISL_2283708 | 07/05/21 | North America / Mexico / Mexico City | Human | Female | 55 | Hospitalized | Oropharyngeal swab |
| hCoV-19/Mexico/CMX-InDRE_FD64177_S2066/2021   | EPI_ISL_2283706 | 07/05/21 | North America / Mexico / Mexico City | Human | Male   | 19 | Hospitalized | Oropharyngeal swab |
| hCoV-19/Mexico/CMX-InDRE_FD64253_S2063/2021   | EPI_ISL_2295589 | 05/03/21 | North America / Mexico / Mexico City | Human | Female | 22 | Hospitalized | Oropharyngeal swab |
| hCoV-19/Mexico/CMX-InDRE_FD64705_S2062/2021   | EPI_ISL_2295588 | 09/05/21 | North America / Mexico / Mexico City | Human | Male   | 43 | Hospitalized | Oropharyngeal swab |
| hCoV-19/Mexico/CMX-InDRE_FD69482_S2781/2021   | EPI_ISL_2533807 | 17/05/21 | North America / Mexico / Mexico City | Human | Male   | 31 | Hospitalized | Oropharyngeal swab |
| hCoV-19/Mexico/CMX-InDRE_FD69743_S3075/2021   | EPI_ISL_2663342 | 19/05/21 | North America / Mexico / Mexico City | Human | Male   | 50 | Hospitalized | Oropharyngeal swab |
| hCoV-19/Mexico/CMX-InDRE_FD71018_S2782/2021   | EPI_ISL_2533808 | 19/05/21 | North America / Mexico / Mexico City | Human | Female | 45 | Hospitalized | Oropharyngeal swab |
| hCoV-19/Mexico/CMX-InDRE_FD71149_S2784/2021   | EPI_ISL_2533810 | 19/05/21 | North America / Mexico / Mexico City | Human | Female | 48 | Hospitalized | Oropharyngeal swab |
| hCoV-19/Mexico/CMX-InDRE_FD71474_S2785/2021   | EPI_ISL_2533811 | 20/05/21 | North America / Mexico / Mexico City | Human | Female | 40 | Hospitalized | Oropharyngeal swab |
| hCoV-19/Mexico/CMX-InDRE_FD71481_S3076/2021   | EPI_ISL_2663343 | 20/05/21 | North America / Mexico / Mexico City | Human | Male   | 71 | Hospitalized | Oropharyngeal swab |
| hCoV-19/Mexico/CMX-InDRE_FD71675_S3077/2021   | EPI_ISL_2663344 | 20/05/21 | North America / Mexico / Mexico City | Human | Male   | 59 | Hospitalized | Oropharyngeal swab |
| hCoV-19/Mexico/CMX-InDRE_FD72271_S3091/2021   | EPI_ISL_2663358 | 21/05/21 | North America / Mexico / Mexico City | Human | Female | 30 | Hospitalized | Oropharyngeal swab |
| hCoV-19/Mexico/CMX-InDRE_FD72328_S2786/2021   | EPI_ISL_2533812 | 21/05/21 | North America / Mexico / Mexico City | Human | Female | 53 | Hospitalized | Oropharyngeal swab |
| hCoV-19/Mexico/CMX-InDRE_FD72355_S2787/2021   | EPI_ISL_2533813 | 22/05/21 | North America / Mexico / Mexico City | Human | Female | 38 | Hospitalized | Oropharyngeal swab |







|                                                 |                 |          |                                         |       |        |    |              |                    |
|-------------------------------------------------|-----------------|----------|-----------------------------------------|-------|--------|----|--------------|--------------------|
| hCoV-19/Mexico/CMX-INMEGEN-06-03-212/2021       | EPI_ISL_2842785 | 24/06/21 | North America / Mexico / Mexico City    | Human | Female | 47 | unknown      | Oropharyngeal swab |
| hCoV-19/Mexico/CMX-INMEGEN-06-03-228/2021       | EPI_ISL_2842803 | 02/06/21 | North America / Mexico / Mexico City    | Human | Female | 23 | unknown      | Oropharyngeal swab |
| hCoV-19/Mexico/CMX-INMEGEN-06-03-284/2021       | EPI_ISL_2810246 | 23/06/21 | North America / Mexico / Mexico City    | Human | Male   | 24 | unknown      | Oropharyngeal swab |
| hCoV-19/Mexico/CMX-INMEGEN-06-03-319/2021       | EPI_ISL_2810277 | 09/06/21 | North America / Mexico / Mexico City    | Human | Female | 29 | unknown      | Oropharyngeal swab |
| hCoV-19/Mexico/CMX-INMEGEN-06-03-32/2021        | EPI_ISL_2810050 | 24/06/21 | North America / Mexico / Mexico City    | Human | Female | 25 | unknown      | Oropharyngeal swab |
| hCoV-19/Mexico/CMX-INMEGEN-06-03-33/2021        | EPI_ISL_2810051 | 24/06/21 | North America / Mexico / Mexico City    | Human | Male   | 45 | unknown      | Oropharyngeal swab |
| hCoV-19/Mexico/CMX-INMEGEN-06-03-38/2021        | EPI_ISL_2810055 | 24/06/21 | North America / Mexico / Mexico City    | Human | Male   | 29 | unknown      | Oropharyngeal swab |
| hCoV-19/Mexico/CMX-INMEGEN-06-03-39/2021        | EPI_ISL_2810056 | 24/06/21 | North America / Mexico / State of Mexic | Human | Female | 20 | unknown      | Oropharyngeal swab |
| hCoV-19/Mexico/CMX-INMEGEN-06-03-41/2021        | EPI_ISL_2810058 | 24/06/21 | North America / Mexico / Mexico City    | Human | Female | 34 | unknown      | Oropharyngeal swab |
| hCoV-19/Mexico/CMX-INMEGEN-06-03-65/2021        | EPI_ISL_2810074 | 24/06/21 | North America / Mexico / Mexico City    | Human | Female | 56 | unknown      | Oropharyngeal swab |
| hCoV-19/Mexico/CMX-INMEGEN-06-04-107/2021       | EPI_ISL_2894237 | 21/06/21 | North America / Mexico / Mexico City    | Human | Male   | 46 | unknown      | Oropharyngeal swab |
| hCoV-19/Mexico/CMX-INMEGEN-06-04-191/2021       | EPI_ISL_2894261 | 22/06/21 | North America / Mexico / Mexico City    | Human | Female | 21 | unknown      | Oropharyngeal swab |
| hCoV-19/Mexico/CMX-INMEGEN-06-04-208/2021       | EPI_ISL_2894273 | 25/06/21 | North America / Mexico / Mexico City    | Human | Male   | 50 | unknown      | Oropharyngeal swab |
| hCoV-19/Mexico/CMX-INMEGEN-06-04-209/2021       | EPI_ISL_2894274 | 25/06/21 | North America / Mexico / Mexico City    | Human | Male   | 45 | unknown      | Oropharyngeal swab |
| hCoV-19/Mexico/CMX-INMEGEN-06-04-64/2021        | EPI_ISL_2894208 | 09/06/21 | North America / Mexico / Mexico City    | Human | Female | 23 | unknown      | Oropharyngeal swab |
| hCoV-19/Mexico/CMX-INMEGEN-06-04-66/2021        | EPI_ISL_2894210 | 10/06/21 | North America / Mexico / Mexico City    | Human | Male   | 21 | unknown      | Oropharyngeal swab |
| hCoV-19/Mexico/CMX-INMEGEN-16-21/2021           | EPI_ISL_2978376 | 26/06/21 | North America / Mexico / Mexico City    | Human | Female | 18 | unknown      | Oropharyngeal swab |
| hCoV-19/Mexico/CMX-INMEGEN-16-75/2021           | EPI_ISL_2978423 | 05/07/21 | North America / Mexico / Mexico City    | Human | Female | 31 | unknown      | Oropharyngeal swab |
| hCoV-19/Mexico/CMX-INMEGEN-INDRE-04-04-99/2021  | EPI_ISL_1628598 | 05/04/21 | North America / Mexico / Mexico City    | Human | Female | 55 | unknown      | Oropharyngeal swab |
| hCoV-19/Mexico/CMX-INMEGEN-INDRE-04-06-165/2021 | EPI_ISL_1810898 | 16/04/21 | North America / Mexico / Mexico City    | Human | Male   | 52 | Hospitalized | Oropharyngeal swab |
| hCoV-19/Mexico/CMX-INMEGEN-INDRE-04-06-166/2021 | EPI_ISL_1810899 | 16/04/21 | North America / Mexico / Mexico City    | Human | Female | 52 | Hospitalized | Oropharyngeal swab |
| hCoV-19/Mexico/CMX-INMEGEN-INDRE-04-06-175/2021 | EPI_ISL_1810908 | 16/04/21 | North America / Mexico / Mexico City    | Human | Male   | 27 | Hospitalized | Oropharyngeal swab |
| hCoV-19/Mexico/CMX-INMEGEN-INDRE-04-06-182/2021 | EPI_ISL_1810915 | 17/04/21 | North America / Mexico / Mexico City    | Human | Female | 39 | Hospitalized | Oropharyngeal swab |
| hCoV-19/Mexico/CMX-INMEGEN-INDRE-05-03-195/2021 | EPI_ISL_2319317 | 10/05/21 | North America / Mexico / Mexico City    | Human | Female | 29 | unknown      | Oropharyngeal swab |
| hCoV-19/Mexico/CMX-INMEGEN-INDRE-05-03-209/2021 | EPI_ISL_2319330 | 09/05/21 | North America / Mexico / Mexico City    | Human | Male   | 48 | unknown      | Oropharyngeal swab |
| hCoV-19/Mexico/CMX-INMEGEN-INDRE-05-03-211/2021 | EPI_ISL_2319331 | 07/05/21 | North America / Mexico / Mexico City    | Human | Female | 74 | unknown      | Oropharyngeal swab |
| hCoV-19/Mexico/CMX-INMEGEN-INDRE-05-03-212/2021 | EPI_ISL_2319332 | 10/05/21 | North America / Mexico / Mexico City    | Human | Male   | 30 | unknown      | Oropharyngeal swab |
| hCoV-19/Mexico/CMX-INMEGEN-INDRE-05-03-233/2021 | EPI_ISL_2319347 | 12/05/21 | North America / Mexico / Mexico City    | Human | Female | 64 | unknown      | Oropharyngeal swab |
| hCoV-19/Mexico/CMX-INMEGEN-INDRE-05-03-249/2021 | EPI_ISL_2319359 | 12/05/21 | North America / Mexico / Mexico City    | Human | Male   | 67 | unknown      | Oropharyngeal swab |
| hCoV-19/Mexico/CMX-INMEGEN-INDRE-05-03-253/2021 | EPI_ISL_2319363 | 11/05/21 | North America / Mexico / Mexico City    | Human | Female | 30 | unknown      | Oropharyngeal swab |
| hCoV-19/Mexico/CMX-INMEGEN-INDRE-05-03-271/2021 | EPI_ISL_2319371 | 14/05/21 | North America / Mexico / Mexico City    | Human | Male   | 16 | unknown      | Oropharyngeal swab |
| hCoV-19/Mexico/CMX-INMEGEN-INDRE-05-03-275/2021 | EPI_ISL_2319375 | 14/05/21 | North America / Mexico / Mexico City    | Human | Male   | 53 | unknown      | Oropharyngeal swab |
| hCoV-19/Mexico/COA-INDRE_FB13031_S1493/2021     | EPI_ISL_1805471 | 09/04/21 | North America / Mexico / Coahuila       | Human | Female | 38 | Hospitalized | Oropharyngeal swab |
| hCoV-19/Mexico/COA-INDRE_FB14127_S1762/2021     | EPI_ISL_2101901 | 25/04/21 | North America / Mexico / Coahuila       | Human | Female | 60 | Hospitalized | Oropharyngeal swab |
| hCoV-19/Mexico/COA-INDRE_FB16336_S2737/2021     | EPI_ISL_2533763 | 20/05/21 | North America / Mexico / Coahuila       | Human | Male   | 39 | Hospitalized | Oropharyngeal swab |
| hCoV-19/Mexico/COA-INDRE_FB16772_S2777/2021     | EPI_ISL_2533803 | 24/05/21 | North America / Mexico / Coahuila       | Human | Female | 38 | Hospitalized | Oropharyngeal swab |
| hCoV-19/Mexico/COA-INDRE_FB17411_S3519/2021     | EPI_ISL_2779034 | 03/06/21 | North America / Mexico / Coahuila       | Human | Male   | 24 | Hospitalized | Oropharyngeal swab |
| hCoV-19/Mexico/COA-INDRE_FB17711_S4112/2021     | EPI_ISL_2920683 | 08/06/21 | North America / Mexico / Coahuila       | Human | Female | 34 | Hospitalized | Oropharyngeal swab |
| hCoV-19/Mexico/COA-INDRE_FB18231_S4134/2021     | EPI_ISL_2920705 | 17/06/21 | North America / Mexico / Coahuila       | Human | Male   | 56 | Hospitalized | Oropharyngeal swab |
| hCoV-19/Mexico/COL-INDRE_FB15039_S2055/2021     | EPI_ISL_2283697 | 06/05/21 | North America / Mexico / Colima         | Human | Male   | 77 | Hospitalized | Oropharyngeal swab |
| hCoV-19/Mexico/COL-INDRE_FB16092_S2459/2021     | EPI_ISL_2455980 | 18/05/21 | North America / Mexico / Colima         | Human | Male   | 35 | Hospitalized | Oropharyngeal swab |
| hCoV-19/Mexico/COL-INDRE_FB16093_S3078/2021     | EPI_ISL_2663345 | 11/05/21 | North America / Mexico / Colima         | Human | Male   | 58 | Hospitalized | Oropharyngeal swab |
| hCoV-19/Mexico/COL-INDRE_FB16402_S2480/2021     | EPI_ISL_2456001 | 20/05/21 | North America / Mexico / Colima         | Human | Female | 62 | unknown      | Oropharyngeal swab |
| hCoV-19/Mexico/COL-INDRE_FB17828_S4115/2021     | EPI_ISL_2920686 | 09/06/21 | North America / Mexico / Colima         | Human | Female | 26 | Hospitalized | Oropharyngeal swab |
| hCoV-19/Mexico/DUR-INDRE_FB17381_S3478/2021     | EPI_ISL_2778993 | 09/06/21 | North America / Mexico / Durango        | Human | Male   | 28 | Hospitalized | Oropharyngeal swab |
| hCoV-19/Mexico/DUR-INDRE_FB17382_S3479/2021     | EPI_ISL_2778994 | 09/06/21 | North America / Mexico / Durango        | Human | Male   | 19 | Hospitalized | Oropharyngeal swab |
| hCoV-19/Mexico/DUR-INDRE_FB17386_S3481/2021     | EPI_ISL_2778996 | 09/06/21 | North America / Mexico / Durango        | Human | Female | 18 | Hospitalized | Oropharyngeal swab |
| hCoV-19/Mexico/DUR-INDRE_FB17390_S3485/2021     | EPI_ISL_2779000 | 09/06/21 | North America / Mexico / Durango        | Human | Male   | 20 | Hospitalized | Oropharyngeal swab |
| hCoV-19/Mexico/GRO-INDRE_F48G_S568/2021         | EPI_ISL_1334381 | 21/01/21 | North America / Mexico / Guerrero       | Human | Male   | 53 | Deceased     | Oropharyngeal swab |
| hCoV-19/Mexico/GUA-INDRE_F10833_S574/2021       | EPI_ISL_1334386 | 22/02/21 | North America / Mexico / Guanajuato     | Human | Female | 48 | Hospitalized | Oropharyngeal swab |
| hCoV-19/Mexico/GUA-INDRE_F12716_S1202/2021      | EPI_ISL_1626809 | 02/04/21 | North America / Mexico / Guanajuato     | Human | Female | 57 | Hospitalized | Oropharyngeal swab |
| hCoV-19/Mexico/GUA-INDRE_FB13877_S2078/2021     | EPI_ISL_2283718 | 19/04/21 | North America / Mexico / Guanajuato     | Human | Male   | 86 | Hospitalized | Oropharyngeal swab |

|                                             |                 |          |                                     |       |        |    |              |                    |
|---------------------------------------------|-----------------|----------|-------------------------------------|-------|--------|----|--------------|--------------------|
| hCoV-19/Mexico/GUA-InDRE_FB13881_S1754/2021 | EPI_ISL_2101893 | 20/04/21 | North America / Mexico / Guanajuato | Human | Male   | 47 | Hospitalized | Oropharyngeal swab |
| hCoV-19/Mexico/GUA-InDRE_FB13904_S2077/2021 | EPI_ISL_2283717 | 20/04/21 | North America / Mexico / Guanajuato | Human | Male   | 41 | Hospitalized | Oropharyngeal swab |
| hCoV-19/Mexico/GUA-InDRE_FB13907_S1755/2021 | EPI_ISL_2101894 | 21/04/21 | North America / Mexico / Guanajuato | Human | Male   | 29 | Hospitalized | Oropharyngeal swab |
| hCoV-19/Mexico/GUA-InDRE_FB14636_S2081/2021 | EPI_ISL_2295590 | 30/04/21 | North America / Mexico / Guanajuato | Human | Male   | 25 | Hospitalized | Oropharyngeal swab |
| hCoV-19/Mexico/GUA-InDRE_FB14800_S2082/2021 | EPI_ISL_2283721 | 03/05/21 | North America / Mexico / Guanajuato | Human | Male   | 54 | Hospitalized | Oropharyngeal swab |
| hCoV-19/Mexico/GUA-InDRE_FB14824_S2083/2021 | EPI_ISL_2283722 | 06/05/21 | North America / Mexico / Guanajuato | Human | Female | 25 | Hospitalized | Oropharyngeal swab |
| hCoV-19/Mexico/GUA-InDRE_FB14826_S2470/2021 | EPI_ISL_2455991 | 05/05/21 | North America / Mexico / Guanajuato | Human | Female | 31 | Hospitalized | Oropharyngeal swab |
| hCoV-19/Mexico/GUA-InDRE_FB14832_S3059/2021 | EPI_ISL_2663326 | 06/05/21 | North America / Mexico / Guanajuato | Human | Male   | 46 | Hospitalized | Oropharyngeal swab |
| hCoV-19/Mexico/GUA-InDRE_FB14839_S2469/2021 | EPI_ISL_2455990 | 05/05/21 | North America / Mexico / Guanajuato | Human | Male   | 57 | Hospitalized | Oropharyngeal swab |
| hCoV-19/Mexico/GUA-InDRE_FB16209_S2465/2021 | EPI_ISL_2455986 | 17/05/21 | North America / Mexico / Guanajuato | Human | Male   | 54 | Hospitalized | Oropharyngeal swab |
| hCoV-19/Mexico/GUA-InDRE_FB16216_S2466/2021 | EPI_ISL_2455987 | 18/05/21 | North America / Mexico / Guanajuato | Human | Male   | 36 | Hospitalized | Oropharyngeal swab |
| hCoV-19/Mexico/GUA-InDRE_FB16219_S2467/2021 | EPI_ISL_2455988 | 19/05/21 | North America / Mexico / Guanajuato | Human | Male   | 20 | Hospitalized | Oropharyngeal swab |
| hCoV-19/Mexico/GUA-InDRE_FB16459_S3475/2021 | EPI_ISL_2778990 | 24/05/21 | North America / Mexico / Guanajuato | Human | Female | 62 | Hospitalized | Oropharyngeal swab |
| hCoV-19/Mexico/GUA-InDRE_FB16460_S3779/2021 | EPI_ISL_2779281 | 25/05/21 | North America / Mexico / Guanajuato | Human | Male   | 54 | Hospitalized | Oropharyngeal swab |
| hCoV-19/Mexico/GUA-InDRE_FB16463_S3476/2021 | EPI_ISL_2778991 | 25/05/21 | North America / Mexico / Guanajuato | Human | Female | 53 | Hospitalized | Oropharyngeal swab |
| hCoV-19/Mexico/GUA-InDRE_FB16465_S3477/2021 | EPI_ISL_2778992 | 26/05/21 | North America / Mexico / Guanajuato | Human | Male   | 16 | Hospitalized | Oropharyngeal swab |
| hCoV-19/Mexico/GUA-InDRE_FB16466_S3504/2021 | EPI_ISL_2779019 | 26/05/21 | North America / Mexico / Guanajuato | Human | Female | 22 | Hospitalized | Oropharyngeal swab |
| hCoV-19/Mexico/GUA-InDRE_FB16891_S3116/2021 | EPI_ISL_2663383 | 31/05/21 | North America / Mexico / Guanajuato | Human | Female | 50 | Hospitalized | Oropharyngeal swab |
| hCoV-19/Mexico/GUA-InDRE_FB16894_S3117/2021 | EPI_ISL_2663384 | 28/05/21 | North America / Mexico / Guanajuato | Human | Female | 55 | Hospitalized | Oropharyngeal swab |
| hCoV-19/Mexico/GUA-InDRE_FB16899_S3118/2021 | EPI_ISL_2663385 | 31/05/21 | North America / Mexico / Guanajuato | Human | Female | 46 | Hospitalized | Oropharyngeal swab |
| hCoV-19/Mexico/GUA-InDRE_FB16904_S3119/2021 | EPI_ISL_2663386 | 02/06/21 | North America / Mexico / Guanajuato | Human | Male   | 29 | Hospitalized | Oropharyngeal swab |
| hCoV-19/Mexico/GUA-InDRE_FB16908_S3120/2021 | EPI_ISL_2663387 | 03/06/21 | North America / Mexico / Guanajuato | Human | Female | 67 | Hospitalized | Oropharyngeal swab |
| hCoV-19/Mexico/GUA-InDRE_FB16911_S3121/2021 | EPI_ISL_2663388 | 03/06/21 | North America / Mexico / Guanajuato | Human | Female | 51 | Hospitalized | Oropharyngeal swab |
| hCoV-19/Mexico/GUA-InDRE_FB17325_S3532/2021 | EPI_ISL_2779047 | 07/06/21 | North America / Mexico / Guanajuato | Human | Female | 50 | Hospitalized | Oropharyngeal swab |
| hCoV-19/Mexico/GUA-InDRE_FB17346_S3533/2021 | EPI_ISL_2779048 | 11/06/21 | North America / Mexico / Guanajuato | Human | Female | 80 | Deceased     | Oropharyngeal swab |
| hCoV-19/Mexico/HID-InDRE_F12574_S1201/2021  | EPI_ISL_1626808 | 28/03/21 | North America / Mexico / Hidalgo    | Human | Male   | 29 | unknown      | Oropharyngeal swab |
| hCoV-19/Mexico/HID-InDRE_FB13039_S1505/2021 | EPI_ISL_1805483 | 06/04/21 | North America / Mexico / Hidalgo    | Human | Male   | 18 | unknown      | Oropharyngeal swab |
| hCoV-19/Mexico/HID-InDRE_FB13996_S2048/2021 | EPI_ISL_2283690 | 19/04/21 | North America / Mexico / Hidalgo    | Human | Male   | 76 | Hospitalized | Oropharyngeal swab |
| hCoV-19/Mexico/HID-InDRE_FB14798_S2046/2021 | EPI_ISL_2283688 | 05/05/21 | North America / Mexico / Hidalgo    | Human | Male   | 73 | Hospitalized | Oropharyngeal swab |
| hCoV-19/Mexico/HID-InDRE_FB17207_S3093/2021 | EPI_ISL_2663360 | 21/05/21 | North America / Mexico / Hidalgo    | Human | Male   | 36 | Hospitalized | Oropharyngeal swab |
| hCoV-19/Mexico/HID-InDRE_FB17212_S3094/2021 | EPI_ISL_2663361 | 26/05/21 | North America / Mexico / Hidalgo    | Human | Male   | 44 | Hospitalized | Oropharyngeal swab |
| hCoV-19/Mexico/HID-InDRE_FB17213_S3095/2021 | EPI_ISL_2663362 | 26/05/21 | North America / Mexico / Hidalgo    | Human | Female | 42 | Hospitalized | Oropharyngeal swab |
| hCoV-19/Mexico/HID-InDRE_FB17214_S3096/2021 | EPI_ISL_2663363 | 26/05/21 | North America / Mexico / Hidalgo    | Human | Female | 64 | Hospitalized | Oropharyngeal swab |
| hCoV-19/Mexico/HID-InDRE_FB17221_S3097/2021 | EPI_ISL_2663364 | 28/05/21 | North America / Mexico / Hidalgo    | Human | Female | 54 | Deceased     | Oropharyngeal swab |
| hCoV-19/Mexico/HID-InDRE_FB17223_S3098/2021 | EPI_ISL_2663365 | 29/05/21 | North America / Mexico / Hidalgo    | Human | Male   | 57 | Deceased     | Oropharyngeal swab |
| hCoV-19/Mexico/HID-InDRE_FB17224_S3099/2021 | EPI_ISL_2663366 | 29/05/21 | North America / Mexico / Hidalgo    | Human | Male   | 52 | Hospitalized | Oropharyngeal swab |
| hCoV-19/Mexico/HID-InDRE_FB17225_S3100/2021 | EPI_ISL_2663367 | 29/05/21 | North America / Mexico / Hidalgo    | Human | Male   | 54 | Deceased     | Oropharyngeal swab |
| hCoV-19/Mexico/HID-InDRE_FB17226_S3101/2021 | EPI_ISL_2663368 | 31/05/21 | North America / Mexico / Hidalgo    | Human | Male   | 26 | Hospitalized | Oropharyngeal swab |
| hCoV-19/Mexico/HID-InDRE_FB17234_S3102/2021 | EPI_ISL_2663369 | 05/06/21 | North America / Mexico / Hidalgo    | Human | Female | 43 | Hospitalized | Oropharyngeal swab |
| hCoV-19/Mexico/HID-InDRE_FB17235_S3103/2021 | EPI_ISL_2663370 | 05/06/21 | North America / Mexico / Hidalgo    | Human | Male   | 15 | Hospitalized | Oropharyngeal swab |
| hCoV-19/Mexico/HID-InDRE_FB17239_S3104/2021 | EPI_ISL_2663371 | 08/06/21 | North America / Mexico / Hidalgo    | Human | Female | 17 | Hospitalized | Oropharyngeal swab |
| hCoV-19/Mexico/HID-InDRE_FB17241_S3105/2021 | EPI_ISL_2663372 | 08/06/21 | North America / Mexico / Hidalgo    | Human | Female | 40 | Hospitalized | Oropharyngeal swab |
| hCoV-19/Mexico/HID-InDRE_FB17242_S3106/2021 | EPI_ISL_2663373 | 08/06/21 | North America / Mexico / Hidalgo    | Human | Female | 67 | Hospitalized | Oropharyngeal swab |
| hCoV-19/Mexico/HID-InDRE_FB17245_S3107/2021 | EPI_ISL_2663374 | 09/06/21 | North America / Mexico / Hidalgo    | Human | Male   | 43 | Hospitalized | Oropharyngeal swab |
| hCoV-19/Mexico/HID-InDRE_FB17246_S3108/2021 | EPI_ISL_2663375 | 09/06/21 | North America / Mexico / Hidalgo    | Human | Male   | 29 | Hospitalized | Oropharyngeal swab |
| hCoV-19/Mexico/HID-InDRE_FB17887_S3933/2021 | EPI_ISL_2858947 | 14/06/21 | North America / Mexico / Hidalgo    | Human | Male   | 51 | Hospitalized | Oropharyngeal swab |
| hCoV-19/Mexico/HID-InDRE_FB19125_S4493/2021 | EPI_ISL_3033347 | 21/06/21 | North America / Mexico / Hidalgo    | Human | Male   | 53 | Hospitalized | Oropharyngeal swab |
| hCoV-19/Mexico/HID-InDRE_FB19127_S4494/2021 | EPI_ISL_3033348 | 22/06/21 | North America / Mexico / Hidalgo    | Human | Male   | 17 | Hospitalized | Oropharyngeal swab |
| hCoV-19/Mexico/HID-InDRE_FB19128_S4495/2021 | EPI_ISL_3033349 | 22/06/21 | North America / Mexico / Hidalgo    | Human | Female | 43 | Hospitalized | Oropharyngeal swab |
| hCoV-19/Mexico/HID-InDRE_FB19136_S4496/2021 | EPI_ISL_3033350 | 25/06/21 | North America / Mexico / Hidalgo    | Human | Male   | 61 | Hospitalized | Oropharyngeal swab |
| hCoV-19/Mexico/HID-InDRE_FB19137_S4497/2021 | EPI_ISL_3033351 | 25/06/21 | North America / Mexico / Hidalgo    | Human | Male   | 38 | Deceased     | Oropharyngeal swab |
| hCoV-19/Mexico/HID-InDRE_FB19139_S4498/2021 | EPI_ISL_3033352 | 25/06/21 | North America / Mexico / Hidalgo    | Human | Female | 55 | Hospitalized | Oropharyngeal swab |



|                                             |                 |          |                                          |       |        |    |              |                    |
|---------------------------------------------|-----------------|----------|------------------------------------------|-------|--------|----|--------------|--------------------|
| hCoV-19/Mexico/HID-INMEGEN-05-02-116/2021   | EPI_ISL_2230873 | 29/04/21 | North America / Mexico / Hidalgo         | Human | Female | 39 | unknown      | Oropharyngeal swab |
| hCoV-19/Mexico/HID-INMEGEN-05-02-154/2021   | EPI_ISL_2230876 | 30/04/21 | North America / Mexico / Hidalgo         | Human | Female | 22 | unknown      | Oropharyngeal swab |
| hCoV-19/Mexico/HID-INMEGEN-05-02-171/2021   | EPI_ISL_2230878 | 02/05/21 | North America / Mexico / Hidalgo         | Human | Female | 21 | unknown      | Oropharyngeal swab |
| hCoV-19/Mexico/HID-INMEGEN-05-02-179/2021   | EPI_ISL_2230885 | 02/05/21 | North America / Mexico / Hidalgo         | Human | Female | 20 | unknown      | Oropharyngeal swab |
| hCoV-19/Mexico/HID-INMEGEN-05-03-156/2021   | EPI_ISL_2319289 | 09/05/21 | North America / Mexico / Hidalgo         | Human | Female | 54 | unknown      | Oropharyngeal swab |
| hCoV-19/Mexico/HID-INMEGEN-05-03-157/2021   | EPI_ISL_2319290 | 09/05/21 | North America / Mexico / Hidalgo         | Human | Female | 21 | unknown      | Oropharyngeal swab |
| hCoV-19/Mexico/HID-INMEGEN-05-03-160/2021   | EPI_ISL_2319293 | 09/05/21 | North America / Mexico / Hidalgo         | Human | Female | 26 | unknown      | Oropharyngeal swab |
| hCoV-19/Mexico/HID-INMEGEN-05-03-29/2021    | EPI_ISL_2319191 | 07/05/21 | North America / Mexico / Hidalgo         | Human | Female | 44 | unknown      | Oropharyngeal swab |
| hCoV-19/Mexico/HID-INMEGEN-05-03-32/2021    | EPI_ISL_2319193 | 07/05/21 | North America / Mexico / Hidalgo         | Human | Female | 69 | unknown      | Oropharyngeal swab |
| hCoV-19/Mexico/HID-INMEGEN-05-04-25/2021    | EPI_ISL_2349903 | 11/05/21 | North America / Mexico / Hidalgo         | Human | Female | 55 | unknown      | Oropharyngeal swab |
| hCoV-19/Mexico/HID-INMEGEN-05-04-37/2021    | EPI_ISL_2349913 | 12/05/21 | North America / Mexico / Hidalgo         | Human | Male   | 59 | unknown      | Oropharyngeal swab |
| hCoV-19/Mexico/HID-INMEGEN-05-05-141/2021   | EPI_ISL_2444484 | 21/05/21 | North America / Mexico / Hidalgo         | Human | Male   | 39 | unknown      | Oropharyngeal swab |
| hCoV-19/Mexico/HID-INMEGEN-05-05-71/2021    | EPI_ISL_2444449 | 23/05/21 | North America / Mexico / Hidalgo         | Human | Male   | 60 | unknown      | Oropharyngeal swab |
| hCoV-19/Mexico/HID-INMEGEN-05-06-371/2021   | EPI_ISL_2603814 | 28/05/21 | North America / Mexico / Hidalgo         | Human | Female | 30 | unknown      | Oropharyngeal swab |
| hCoV-19/Mexico/HID-INMEGEN-06-03-153/2021   | EPI_ISL_2928491 | 03/06/21 | North America / Mexico / Hidalgo         | Human | Female | 22 | unknown      | Oropharyngeal swab |
| hCoV-19/Mexico/HID-INMEGEN-06-03-173/2021   | EPI_ISL_2928492 | 14/06/21 | North America / Mexico / Hidalgo         | Human | Male   | 28 | unknown      | Oropharyngeal swab |
| hCoV-19/Mexico/HID-INMEGEN-06-03-186/2021   | EPI_ISL_2810168 | 04/06/21 | North America / Mexico / Hidalgo         | Human | Female | 45 | unknown      | Oropharyngeal swab |
| hCoV-19/Mexico/JAL-InDRE_F11689_S895/2021   | EPI_ISL_1423505 | 06/03/21 | North America / Mexico / Jalisco         | Human | Male   | 56 | Hospitalized | Oropharyngeal swab |
| hCoV-19/Mexico/JAL-InDRE_FB13392_S1763/2021 | EPI_ISL_2101902 | 16/04/21 | North America / Mexico / Jalisco         | Human | Male   | 51 | unknown      | Oropharyngeal swab |
| hCoV-19/Mexico/JAL-InDRE_FB13396_S1730/2021 | EPI_ISL_2101869 | 19/04/21 | North America / Mexico / Jalisco         | Human | Female | 83 | Hospitalized | Oropharyngeal swab |
| hCoV-19/Mexico/JAL-InDRE_FB13967_S1756/2021 | EPI_ISL_2101895 | 21/04/21 | North America / Mexico / Jalisco         | Human | Male   | 78 | Hospitalized | Oropharyngeal swab |
| hCoV-19/Mexico/JAL-InDRE_FB13972_S1752/2021 | EPI_ISL_2101891 | 21/04/21 | North America / Mexico / Jalisco         | Human | Male   | 78 | Deceased     | Oropharyngeal swab |
| hCoV-19/Mexico/JAL-InDRE_FB14113_S1761/2021 | EPI_ISL_2101900 | 26/04/21 | North America / Mexico / Jalisco         | Human | Female | 41 | Hospitalized | Oropharyngeal swab |
| hCoV-19/Mexico/JAL-InDRE_FB14278_S1766/2021 | EPI_ISL_2101905 | 27/04/21 | North America / Mexico / Jalisco         | Human | Male   | 70 | unknown      | Oropharyngeal swab |
| hCoV-19/Mexico/JAL-InDRE_FB14563_S2044/2021 | EPI_ISL_2283686 | 29/04/21 | North America / Mexico / Jalisco         | Human | Male   | 51 | unknown      | Oropharyngeal swab |
| hCoV-19/Mexico/JAL-InDRE_FB16243_S2434/2021 | EPI_ISL_2455958 | 22/05/21 | North America / Mexico / Jalisco         | Human | Female | 70 | unknown      | Oropharyngeal swab |
| hCoV-19/Mexico/JAL-InDRE_FB16511_S2741/2021 | EPI_ISL_2533767 | 30/05/21 | North America / Mexico / Jalisco         | Human | Male   | 75 | Hospitalized | Oropharyngeal swab |
| hCoV-19/Mexico/JAL-InDRE_FB16739_S2776/2021 | EPI_ISL_2533802 | 22/05/21 | North America / Mexico / Jalisco         | Human | Male   | 55 | unknown      | Oropharyngeal swab |
| hCoV-19/Mexico/JAL-InDRE_FB18117_S3958/2021 | EPI_ISL_2858972 | 12/06/21 | North America / Mexico / Jalisco         | Human | Female | 25 | unknown      | Oropharyngeal swab |
| hCoV-19/Mexico/MEX-InDRE_FB17389_S3484/2021 | EPI_ISL_2778999 | 09/06/21 | North America / Mexico / State of Mexico | Human | Male   | 23 | Hospitalized | Oropharyngeal swab |
| hCoV-19/Mexico/MEX-InDRE_FD68596_S2471/2021 | EPI_ISL_2455992 | 14/05/21 | North America / Mexico / State of Mexico | Human | Male   | 34 | Hospitalized | Oropharyngeal swab |
| hCoV-19/Mexico/MEX-InDRE_FD71099_S2783/2021 | EPI_ISL_2533809 | 19/05/21 | North America / Mexico / State of Mexico | Human | Female | 40 | Hospitalized | Oropharyngeal swab |
| hCoV-19/Mexico/MEX-INMEGEN-05-01-227/2021   | EPI_ISL_2105747 | 27/04/21 | North America / Mexico / State of Mexico | Human | Male   | 48 | unknown      | Oropharyngeal swab |
| hCoV-19/Mexico/MEX-INMEGEN-05-01-240/2021   | EPI_ISL_2105759 | 27/04/21 | North America / Mexico / State of Mexico | Human | Male   | 29 | unknown      | Oropharyngeal swab |
| hCoV-19/Mexico/MEX-INMEGEN-05-01-256/2021   | EPI_ISL_2178757 | 28/04/21 | North America / Mexico / State of Mexico | Human | Female | 25 | unknown      | Oropharyngeal swab |
| hCoV-19/Mexico/MEX-INMEGEN-05-01-266/2021   | EPI_ISL_2105778 | 28/04/21 | North America / Mexico / State of Mexico | Human | Male   | 20 | unknown      | Oropharyngeal swab |
| hCoV-19/Mexico/MEX-INMEGEN-05-01-278/2021   | EPI_ISL_2105790 | 28/04/21 | North America / Mexico / State of Mexico | Human | Male   | 25 | unknown      | Oropharyngeal swab |
| hCoV-19/Mexico/MEX-INMEGEN-05-01-283/2021   | EPI_ISL_2105795 | 28/04/21 | North America / Mexico / State of Mexico | Human | Male   | 49 | unknown      | Oropharyngeal swab |
| hCoV-19/Mexico/MEX-INMEGEN-05-01-309/2021   | EPI_ISL_2105817 | 30/04/21 | North America / Mexico / State of Mexico | Human | Male   | 48 | unknown      | Oropharyngeal swab |
| hCoV-19/Mexico/MEX-INMEGEN-05-01-314/2021   | EPI_ISL_2105822 | 01/05/21 | North America / Mexico / State of Mexico | Human | Male   | 38 | unknown      | Oropharyngeal swab |
| hCoV-19/Mexico/MEX-INMEGEN-05-01-326/2021   | EPI_ISL_2105832 | 01/05/21 | North America / Mexico / State of Mexico | Human | Male   | 33 | unknown      | Oropharyngeal swab |
| hCoV-19/Mexico/MEX-INMEGEN-05-01-345/2021   | EPI_ISL_2105850 | 03/05/21 | North America / Mexico / State of Mexico | Human | Female | 53 | unknown      | Oropharyngeal swab |
| hCoV-19/Mexico/MEX-INMEGEN-05-01-349/2021   | EPI_ISL_2105853 | 03/05/21 | North America / Mexico / State of Mexico | Human | Male   | 21 | unknown      | Oropharyngeal swab |
| hCoV-19/Mexico/MEX-INMEGEN-05-01-366/2021   | EPI_ISL_2105867 | 03/05/21 | North America / Mexico / State of Mexico | Human | Male   | 25 | unknown      | Oropharyngeal swab |
| hCoV-19/Mexico/MEX-INMEGEN-05-02-1/2021     | EPI_ISL_2230865 | 03/05/21 | North America / Mexico / State of Mexico | Human | Male   | 26 | unknown      | Oropharyngeal swab |
| hCoV-19/Mexico/MEX-INMEGEN-05-02-104/2021   | EPI_ISL_2230871 | 29/04/21 | North America / Mexico / State of Mexico | Human | Male   | 21 | unknown      | Oropharyngeal swab |
| hCoV-19/Mexico/MEX-INMEGEN-05-02-135/2021   | EPI_ISL_2230832 | 30/04/21 | North America / Mexico / State of Mexico | Human | Male   | 61 | unknown      | Oropharyngeal swab |
| hCoV-19/Mexico/MEX-INMEGEN-05-02-162/2021   | EPI_ISL_2230883 | 01/05/21 | North America / Mexico / State of Mexico | Human | Male   | 27 | unknown      | Oropharyngeal swab |
| hCoV-19/Mexico/MEX-INMEGEN-05-02-166/2021   | EPI_ISL_2230877 | 02/05/21 | North America / Mexico / State of Mexico | Human | Female | 30 | unknown      | Oropharyngeal swab |
| hCoV-19/Mexico/MEX-INMEGEN-05-02-168/2021   | EPI_ISL_2230806 | 02/05/21 | North America / Mexico / State of Mexico | Human | Female | 58 | unknown      | Oropharyngeal swab |
| hCoV-19/Mexico/MEX-INMEGEN-05-02-175/2021   | EPI_ISL_2230825 | 02/05/21 | North America / Mexico / State of Mexico | Human | Female | 24 | unknown      | Oropharyngeal swab |
| hCoV-19/Mexico/MEX-INMEGEN-05-02-187/2021   | EPI_ISL_2230879 | 03/05/21 | North America / Mexico / State of Mexico | Human | Female | 16 | unknown      | Oropharyngeal swab |





|                                             |                 |          |                                         |       |        |    |              |                    |
|---------------------------------------------|-----------------|----------|-----------------------------------------|-------|--------|----|--------------|--------------------|
| hCoV-19/Mexico/MEX-INMEGEN-05-06-340/2021   | EPI_ISL_2603791 | 28/05/21 | lorth America / Mexico / State of Mexic | Human | Female | 32 | unknown      | Oropharyngeal swab |
| hCoV-19/Mexico/MEX-INMEGEN-05-06-345/2021   | EPI_ISL_2603796 | 29/05/21 | lorth America / Mexico / State of Mexic | Human | Female | 31 | unknown      | Oropharyngeal swab |
| hCoV-19/Mexico/MEX-INMEGEN-05-06-356/2021   | EPI_ISL_2603803 | 28/05/21 | lorth America / Mexico / State of Mexic | Human | Male   | 46 | unknown      | Oropharyngeal swab |
| hCoV-19/Mexico/MEX-INMEGEN-05-06-357/2021   | EPI_ISL_2603804 | 28/05/21 | lorth America / Mexico / State of Mexic | Human | Female | 54 | unknown      | Oropharyngeal swab |
| hCoV-19/Mexico/MEX-INMEGEN-06-01-10/2021    | EPI_ISL_2616828 | 30/05/21 | lorth America / Mexico / State of Mexic | Human | Male   | 12 | unknown      | Oropharyngeal swab |
| hCoV-19/Mexico/MEX-INMEGEN-06-01-117/2021   | EPI_ISL_2616849 | 02/06/21 | lorth America / Mexico / State of Mexic | Human | Male   | 6  | unknown      | Oropharyngeal swab |
| hCoV-19/Mexico/MEX-INMEGEN-06-01-148/2021   | EPI_ISL_2616949 | 02/06/21 | lorth America / Mexico / State of Mexic | Human | Female | 19 | unknown      | Oropharyngeal swab |
| hCoV-19/Mexico/MEX-INMEGEN-06-01-154/2021   | EPI_ISL_2616888 | 02/06/21 | lorth America / Mexico / State of Mexic | Human | Female | 52 | unknown      | Oropharyngeal swab |
| hCoV-19/Mexico/MEX-INMEGEN-06-01-25/2021    | EPI_ISL_2616824 | 30/05/21 | lorth America / Mexico / State of Mexic | Human | Female | 48 | unknown      | Oropharyngeal swab |
| hCoV-19/Mexico/MEX-INMEGEN-06-01-34/2021    | EPI_ISL_2616978 | 31/05/21 | lorth America / Mexico / State of Mexic | Human | Male   | 44 | unknown      | Oropharyngeal swab |
| hCoV-19/Mexico/MEX-INMEGEN-06-01-77/2021    | EPI_ISL_2616998 | 01/06/21 | lorth America / Mexico / State of Mexic | Human | Female | 26 | unknown      | Oropharyngeal swab |
| hCoV-19/Mexico/MEX-INMEGEN-06-01-9/2021     | EPI_ISL_2616850 | 30/05/21 | lorth America / Mexico / State of Mexic | Human | Male   | 16 | unknown      | Oropharyngeal swab |
| hCoV-19/Mexico/MEX-INMEGEN-06-02-194/2021   | EPI_ISL_2778956 | 16/06/21 | lorth America / Mexico / State of Mexic | Human | Male   | 66 | unknown      | Oropharyngeal swab |
| hCoV-19/Mexico/MEX-INMEGEN-06-02-240/2021   | EPI_ISL_2692750 | 16/06/21 | lorth America / Mexico / State of Mexic | Human | Male   | 32 | unknown      | Oropharyngeal swab |
| hCoV-19/Mexico/MEX-INMEGEN-06-02-293/2021   | EPI_ISL_2692787 | 26/05/21 | lorth America / Mexico / State of Mexic | Human | Female | 52 | unknown      | Oropharyngeal swab |
| hCoV-19/Mexico/MEX-INMEGEN-06-03-129/2021   | EPI_ISL_2810121 | 03/06/21 | lorth America / Mexico / State of Mexic | Human | Female | 37 | unknown      | Oropharyngeal swab |
| hCoV-19/Mexico/MEX-INMEGEN-06-03-135/2021   | EPI_ISL_2810126 | 03/06/21 | lorth America / Mexico / State of Mexic | Human | Male   | 28 | unknown      | Oropharyngeal swab |
| hCoV-19/Mexico/MEX-INMEGEN-06-03-136/2021   | EPI_ISL_2810127 | 03/06/21 | lorth America / Mexico / State of Mexic | Human | Female | 34 | unknown      | Oropharyngeal swab |
| hCoV-19/Mexico/MEX-INMEGEN-06-03-159/2021   | EPI_ISL_2810146 | 03/06/21 | lorth America / Mexico / State of Mexic | Human | Male   | 26 | unknown      | Oropharyngeal swab |
| hCoV-19/Mexico/MEX-INMEGEN-06-03-160/2021   | EPI_ISL_2810147 | 03/06/21 | lorth America / Mexico / State of Mexic | Human | Male   | 15 | unknown      | Oropharyngeal swab |
| hCoV-19/Mexico/MEX-INMEGEN-06-03-185/2021   | EPI_ISL_2810167 | 03/06/21 | lorth America / Mexico / State of Mexic | Human | Female | 62 | unknown      | Oropharyngeal swab |
| hCoV-19/Mexico/MEX-INMEGEN-06-03-193/2021   | EPI_ISL_2810174 | 22/06/21 | lorth America / Mexico / State of Mexic | Human | Female | 67 | unknown      | Oropharyngeal swab |
| hCoV-19/Mexico/MEX-INMEGEN-06-03-62/2021    | EPI_ISL_2810072 | 24/06/21 | lorth America / Mexico / State of Mexic | Human | Female | 27 | unknown      | Oropharyngeal swab |
| hCoV-19/Mexico/MEX-INMEGEN-06-03-69/2021    | EPI_ISL_2810078 | 24/06/21 | lorth America / Mexico / State of Mexic | Human | Female | 26 | unknown      | Oropharyngeal swab |
| hCoV-19/Mexico/MEX-INMEGEN-06-04-375/2021   | EPI_ISL_2894414 | 28/06/21 | lorth America / Mexico / State of Mexic | Human | Female | 33 | unknown      | Oropharyngeal swab |
| hCoV-19/Mexico/MEX-INMEGEN-16-260/2021      | EPI_ISL_2978574 | 05/07/21 | lorth America / Mexico / State of Mexic | Human | Male   | 16 | unknown      | Oropharyngeal swab |
| hCoV-19/Mexico/MEX-INMEGEN-16-262/2021      | EPI_ISL_2978576 | 05/07/21 | lorth America / Mexico / State of Mexic | Human | Male   | 57 | unknown      | Oropharyngeal swab |
| hCoV-19/Mexico/MEX-INMEGEN-16-263/2021      | EPI_ISL_2978577 | 05/07/21 | lorth America / Mexico / State of Mexic | Human | Female | 23 | unknown      | Oropharyngeal swab |
| hCoV-19/Mexico/MEX-INMEGEN-16-99/2021       | EPI_ISL_2978445 | 28/06/21 | lorth America / Mexico / State of Mexic | Human | Female | 44 | unknown      | Oropharyngeal swab |
| hCoV-19/Mexico/MIC-InDRE_FB14989_S2053/2021 | EPI_ISL_2283695 | 07/04/21 | North America / Mexico / Michoacan      | Human | Male   | 56 | Hospitalized | Oropharyngeal swab |
| hCoV-19/Mexico/MIC-InDRE_FB14998_S2054/2021 | EPI_ISL_2283696 | 13/04/21 | North America / Mexico / Michoacan      | Human | Male   | 30 | unknown      | Oropharyngeal swab |
| hCoV-19/Mexico/MIC-InDRE_FB18021_S3946/2021 | EPI_ISL_2858960 | 18/06/21 | North America / Mexico / Michoacan      | Human | Male   | 57 | Hospitalized | Oropharyngeal swab |
| hCoV-19/Mexico/MOR-InDRE_FB13639_S1731/2021 | EPI_ISL_2101870 | 10/04/21 | North America / Mexico / Morelos        | Human | Male   | 64 | Hospitalized | Oropharyngeal swab |
| hCoV-19/Mexico/MOR-InDRE_FB16889_S3115/2021 | EPI_ISL_2663382 | 03/06/21 | North America / Mexico / Morelos        | Human | Male   | 32 | Hospitalized | Oropharyngeal swab |
| hCoV-19/Mexico/NAY-InDRE_FB17385_S3480/2021 | EPI_ISL_2778995 | 09/06/21 | North America / Mexico / Nayarit        | Human | Male   | 20 | Hospitalized | Oropharyngeal swab |
| hCoV-19/Mexico/NLE-InDRE_237/2021           | EPI_ISL_961467  | 18/01/21 | North America / Mexico / Nuevo Leon     | Human | Female | 48 | Hospitalized | Oropharyngeal swab |
| hCoV-19/Mexico/NLE-InDRE_238/2021           | EPI_ISL_961468  | 18/01/21 | North America / Mexico / Nuevo Leon     | Human | Male   | 50 | Hospitalized | Oropharyngeal swab |
| hCoV-19/Mexico/NLE-InDRE_240/2021           | EPI_ISL_961469  | 18/01/21 | North America / Mexico / Nuevo Leon     | Human | Male   | 18 | Hospitalized | Oropharyngeal swab |
| hCoV-19/Mexico/NLE-InDRE_F11681_S1199/2021  | EPI_ISL_1626806 | 09/03/21 | North America / Mexico / Nuevo Leon     | Human | Female | 17 | Hospitalized | Oropharyngeal swab |
| hCoV-19/Mexico/NLE-InDRE_FB13119_S1506/2021 | EPI_ISL_1805484 | 26/03/21 | North America / Mexico / Nuevo Leon     | Human | Male   | 55 | unknown      | Oropharyngeal swab |
| hCoV-19/Mexico/NLE-InDRE_FB13201_S1495/2021 | EPI_ISL_1805473 | 05/04/21 | North America / Mexico / Nuevo Leon     | Human | Female | 92 | unknown      | Oropharyngeal swab |
| hCoV-19/Mexico/NLE-InDRE_FB14845_S2084/2021 | EPI_ISL_2283723 | 05/04/21 | North America / Mexico / Nuevo Leon     | Human | Female | 41 | Hospitalized | Oropharyngeal swab |
| hCoV-19/Mexico/NLE-InDRE_FB14848_S2085/2021 | EPI_ISL_2283724 | 05/04/21 | North America / Mexico / Nuevo Leon     | Human | Female | 23 | Hospitalized | Oropharyngeal swab |
| hCoV-19/Mexico/NLE-InDRE_FB16177_S2461/2021 | EPI_ISL_2455982 | 17/05/21 | North America / Mexico / Nuevo Leon     | Human | Male   | 69 | Hospitalized | Oropharyngeal swab |
| hCoV-19/Mexico/NLE-InDRE_FB16180_S2462/2021 | EPI_ISL_2455983 | 18/05/21 | North America / Mexico / Nuevo Leon     | Human | Male   | 65 | Hospitalized | Oropharyngeal swab |
| hCoV-19/Mexico/NLE-InDRE_FB16187_S2463/2021 | EPI_ISL_2455984 | 17/05/21 | North America / Mexico / Nuevo Leon     | Human | Female | 44 | Hospitalized | Oropharyngeal swab |
| hCoV-19/Mexico/NLE-InDRE_FB16191_S2464/2021 | EPI_ISL_2455985 | 19/05/21 | North America / Mexico / Nuevo Leon     | Human | Male   | 24 | Hospitalized | Oropharyngeal swab |
| hCoV-19/Mexico/NLE-InDRE_FB16492_S3060/2021 | EPI_ISL_2663327 | 25/05/21 | North America / Mexico / Nuevo Leon     | Human | Male   | 48 | Hospitalized | Oropharyngeal swab |
| hCoV-19/Mexico/NLE-InDRE_FB16950_S3122/2021 | EPI_ISL_2663389 | 29/05/21 | North America / Mexico / Nuevo Leon     | Human | Male   | 46 | Hospitalized | Oropharyngeal swab |
| hCoV-19/Mexico/NLE-InDRE_FB16953_S3123/2021 | EPI_ISL_2663390 | 01/06/21 | North America / Mexico / Nuevo Leon     | Human | Female | 38 | Hospitalized | Oropharyngeal swab |
| hCoV-19/Mexico/NLE-InDRE_FB16961_S3124/2021 | EPI_ISL_2663391 | 02/06/21 | North America / Mexico / Nuevo Leon     | Human | Female | 39 | Hospitalized | Oropharyngeal swab |
| hCoV-19/Mexico/NLE-InDRE_FB16964_S3125/2021 | EPI_ISL_2663392 | 03/06/21 | North America / Mexico / Nuevo Leon     | Human | Male   | 53 | Hospitalized | Oropharyngeal swab |

|                                             |                 |          |                                     |       |              |        |    |              |                                             |
|---------------------------------------------|-----------------|----------|-------------------------------------|-------|--------------|--------|----|--------------|---------------------------------------------|
| hCoV-19/Mexico/NLE-InDRE_FB17360_S3921/2021 | EPI_ISL_2858935 | 07/06/21 | North America / Mexico / Nuevo Leon | Human |              | Female | 22 | Hospitalized | Oropharyngeal swab                          |
| hCoV-19/Mexico/NLE-InDRE_FB17366_S3922/2021 | EPI_ISL_2858936 | 08/06/21 | North America / Mexico / Nuevo Leon | Human |              | Male   | 50 | Hospitalized | Oropharyngeal swab                          |
| hCoV-19/Mexico/NLE-InDRE_FB17368_S3923/2021 | EPI_ISL_2858937 | 10/06/21 | North America / Mexico / Nuevo Leon | Human |              | Female | 40 | Hospitalized | Oropharyngeal swab                          |
| hCoV-19/Mexico/NLE-InDRE_FB18082_S4116/2021 | EPI_ISL_2920687 | 15/06/21 | North America / Mexico / Nuevo Leon | Human |              | Female | 71 | Hospitalized | Oropharyngeal swab                          |
| hCoV-19/Mexico/NLE-InDRE_FB18085_S4117/2021 | EPI_ISL_2920688 | 15/06/21 | North America / Mexico / Nuevo Leon | Human |              | Male   | 30 | Hospitalized | Oropharyngeal swab                          |
| hCoV-19/Mexico/NLE-InDRE_FB18090_S4118/2021 | EPI_ISL_2920689 | 14/06/21 | North America / Mexico / Nuevo Leon | Human |              | Female | 56 | Hospitalized | Oropharyngeal swab                          |
| hCoV-19/Mexico/NLE-InDRE_FB18093_S4119/2021 | EPI_ISL_2920690 | 15/06/21 | North America / Mexico / Nuevo Leon | Human |              | Female | 25 | Hospitalized | Oropharyngeal swab                          |
| hCoV-19/Mexico/NLE-InDRE_FB18094_S4120/2021 | EPI_ISL_2920691 | 16/06/21 | North America / Mexico / Nuevo Leon | Human |              | Female | 22 | Hospitalized | Oropharyngeal swab                          |
| hCoV-19/Mexico/NLE-InDRE_FB18095_S4121/2021 | EPI_ISL_2920692 | 16/06/21 | North America / Mexico / Nuevo Leon | Human |              | Female | 45 | Hospitalized | Oropharyngeal swab                          |
| hCoV-19/Mexico/NLE-InDRE_FB18317_S3969/2021 | EPI_ISL_2858983 | 02/06/21 | North America / Mexico / Nuevo Leon | Human |              | Male   | 53 | Hospitalized | Oropharyngeal swab                          |
| hCoV-19/Mexico/NLE-LESPNL-20210407010/2021  | EPI_ISL_1911302 | 13/03/21 | North America / Mexico / Nuevo Leon | Human | "DR. BERNAR  | Female | 50 | Hospitalized | Nasopharyngeal and/or oropharyngeal exudate |
| hCoV-19/Mexico/NLE-LESPNL-20210512-417/2021 | EPI_ISL_2102612 | 05/05/21 | North America / Mexico / Nuevo Leon | Human | "Dr. Bernard | Male   | 77 | Ambulatory   | Nasopharyngeal and/or oropharyngeal exudate |
| hCoV-19/Mexico/NLE-LESPNL-20210512-431/2021 | EPI_ISL_2102626 | 30/04/21 | North America / Mexico / Nuevo Leon | Human | U. Nueva Mor | Female | 17 | Ambulatory   | Nasopharyngeal and/or oropharyngeal exudate |
| hCoV-19/Mexico/NLE-LESPNL-20210512-433/2021 | EPI_ISL_2102628 | 07/05/21 | North America / Mexico / Nuevo Leon | Human | U. Nueva Mor | Male   | 59 | Ambulatory   | Nasopharyngeal and/or oropharyngeal exudate |
| hCoV-19/Mexico/NLE-LESPNL-20210512-435/2021 | EPI_ISL_2102630 | 06/05/21 | North America / Mexico / Nuevo Leon | Human | U. Nueva Mor | Male   | 58 | Ambulatory   | Nasopharyngeal and/or oropharyngeal exudate |
| hCoV-19/Mexico/NLE-LESPNL-20210512-439/2021 | EPI_ISL_2102633 | 06/05/21 | North America / Mexico / Nuevo Leon | Human | U. Nueva Mor | Male   | 60 | Ambulatory   | Nasopharyngeal and/or oropharyngeal exudate |
| hCoV-19/Mexico/NLE-LESPNL-20210512-453/2021 | EPI_ISL_2102645 | 02/05/21 | North America / Mexico / Nuevo Leon | Human | Terminal     | Male   | 41 | Ambulatory   | Nasopharyngeal and/or oropharyngeal exudate |
| hCoV-19/Mexico/NLE-LESPNL-20210512-454/2021 | EPI_ISL_2102646 | 02/05/21 | North America / Mexico / Nuevo Leon | Human | Terminal     | Female | 41 | Ambulatory   | Nasopharyngeal and/or oropharyngeal exudate |
| hCoV-19/Mexico/NLE-LESPNL-20210512-455/2021 | EPI_ISL_2102647 | 03/05/21 | North America / Mexico / Nuevo Leon | Human | Terminal     | Male   | 75 | Ambulatory   | Nasopharyngeal and/or oropharyngeal exudate |
| hCoV-19/Mexico/NLE-LESPNL-20210512-458/2021 | EPI_ISL_2102650 | 04/05/21 | North America / Mexico / Nuevo Leon | Human | Terminal     | Male   | 51 | Ambulatory   | Nasopharyngeal and/or oropharyngeal exudate |
| hCoV-19/Mexico/NLE-LESPNL-20210512-460/2021 | EPI_ISL_2102652 | 05/05/21 | North America / Mexico / Nuevo Leon | Human | Terminal     | Male   | 32 | Ambulatory   | Nasopharyngeal and/or oropharyngeal exudate |
| hCoV-19/Mexico/NLE-UANL-067/2021            | EPI_ISL_1789696 | 11/04/21 | North America / Mexico / Nuevo Leon | Human |              | Male   | 19 | Ambulatory   | Oropharyngeal swab                          |
| hCoV-19/Mexico/NLE-UANL-068/2021            | EPI_ISL_1789697 | 11/04/21 | North America / Mexico / Nuevo Leon | Human |              | Male   | 16 | Ambulatory   | Oropharyngeal swab                          |
| hCoV-19/Mexico/NLE-UANL-075/2021            | EPI_ISL_1789699 | 19/04/21 | North America / Mexico / Nuevo Leon | Human |              | Male   | 40 | Ambulatory   | Oropharyngeal swab                          |
| hCoV-19/Mexico/OAX-InDRE_FB13216_S1507/2021 | EPI_ISL_1805485 | 01/04/21 | North America / Mexico / Oaxaca     | Human |              | Male   | 29 | unknown      | Oropharyngeal swab                          |
| hCoV-19/Mexico/OAX-InDRE_FB13300_S1504/2021 | EPI_ISL_1805482 | 08/04/21 | North America / Mexico / Oaxaca     | Human |              | Female | 30 | Hospitalized | Oropharyngeal swab                          |
| hCoV-19/Mexico/OAX-InDRE_FB14523_S2037/2021 | EPI_ISL_2283681 | 27/03/21 | North America / Mexico / Oaxaca     | Human |              | Female | 35 | Hospitalized | Oropharyngeal swab                          |
| hCoV-19/Mexico/OAX-InDRE_FB14526_S2038/2021 | EPI_ISL_2283682 | 31/03/21 | North America / Mexico / Oaxaca     | Human |              | Male   | 31 | Hospitalized | Oropharyngeal swab                          |
| hCoV-19/Mexico/OAX-InDRE_FB14528_S2039/2021 | EPI_ISL_2283683 | 12/04/21 | North America / Mexico / Oaxaca     | Human |              | Male   | 30 | Hospitalized | Oropharyngeal swab                          |
| hCoV-19/Mexico/OAX-InDRE_FB14529_S2040/2021 | EPI_ISL_2283684 | 15/04/21 | North America / Mexico / Oaxaca     | Human |              | Female | 22 | Hospitalized | Oropharyngeal swab                          |
| hCoV-19/Mexico/OAX-InDRE_FB14532_S2042/2021 | EPI_ISL_2283685 | 22/04/21 | North America / Mexico / Oaxaca     | Human |              | Female | 24 | Hospitalized | Oropharyngeal swab                          |
| hCoV-19/Mexico/OAX-InDRE_FB14970_S2052/2021 | EPI_ISL_2283694 | 08/05/21 | North America / Mexico / Oaxaca     | Human |              | Male   | 21 | Hospitalized | Oropharyngeal swab                          |
| hCoV-19/Mexico/OAX-InDRE_FB15918_S2397/2021 | EPI_ISL_2455922 | 13/05/21 | North America / Mexico / Oaxaca     | Human |              | Male   | 34 | Hospitalized | Oropharyngeal swab                          |
| hCoV-19/Mexico/OAX-InDRE_FB17118_S3085/2021 | EPI_ISL_2663352 | 16/05/21 | North America / Mexico / Oaxaca     | Human |              | Male   | 52 | Hospitalized | Oropharyngeal swab                          |
| hCoV-19/Mexico/OAX-InDRE_FB18623_S4153/2021 | EPI_ISL_2920724 | 19/06/21 | North America / Mexico / Oaxaca     | Human |              | Male   | 33 | Hospitalized | Oropharyngeal swab                          |
| hCoV-19/Mexico/PUE-InDRE_FB16502_S2472/2021 | EPI_ISL_2455993 | 27/04/21 | North America / Mexico / Puebla     | Human |              | Female | 83 | unknown      | Oropharyngeal swab                          |
| hCoV-19/Mexico/PUE-InDRE_FB16507_S2473/2021 | EPI_ISL_2455994 | 09/05/21 | North America / Mexico / Puebla     | Human |              | Male   | 39 | unknown      | Oropharyngeal swab                          |
| hCoV-19/Mexico/PUE-InDRE_FB17005_S3132/2021 | EPI_ISL_2663399 | 02/06/21 | North America / Mexico / Puebla     | Human |              | Male   | 50 | Hospitalized | Oropharyngeal swab                          |
| hCoV-19/Mexico/PUE-InDRE_FB17749_S3520/2021 | EPI_ISL_2779035 | 11/06/21 | North America / Mexico / Puebla     | Human |              | Male   | 58 | Deceased     | Oropharyngeal swab                          |
| hCoV-19/Mexico/PUE-InDRE_FB17750_S3521/2021 | EPI_ISL_2779036 | 11/06/21 | North America / Mexico / Puebla     | Human |              | Male   | 60 | Deceased     | Oropharyngeal swab                          |
| hCoV-19/Mexico/PUE-InDRE_FB17754_S3522/2021 | EPI_ISL_2779037 | 11/06/21 | North America / Mexico / Puebla     | Human |              | Female | 39 | Hospitalized | Oropharyngeal swab                          |
| hCoV-19/Mexico/PUE-InDRE_FB17755_S3523/2021 | EPI_ISL_2779038 | 11/06/21 | North America / Mexico / Puebla     | Human |              | Female | 8  | Hospitalized | Oropharyngeal swab                          |
| hCoV-19/Mexico/PUE-InDRE_FB17756_S3524/2021 | EPI_ISL_2779039 | 11/06/21 | North America / Mexico / Puebla     | Human |              | Female | 13 | Hospitalized | Oropharyngeal swab                          |
| hCoV-19/Mexico/PUE-InDRE_FB17764_S3525/2021 | EPI_ISL_2779040 | 11/06/21 | North America / Mexico / Puebla     | Human |              | Female | 17 | Hospitalized | Oropharyngeal swab                          |
| hCoV-19/Mexico/PUE-InDRE_FB17766_S3526/2021 | EPI_ISL_2779041 | 11/06/21 | North America / Mexico / Puebla     | Human |              | Male   | 69 | Hospitalized | Oropharyngeal swab                          |
| hCoV-19/Mexico/PUE-InDRE_FB17767_S3527/2021 | EPI_ISL_2779042 | 11/06/21 | North America / Mexico / Puebla     | Human |              | Male   | 42 | Hospitalized | Oropharyngeal swab                          |
| hCoV-19/Mexico/PUE-InDRE_FB19607_S4512/2021 | EPI_ISL_3033365 | 16/06/21 | North America / Mexico / Puebla     | Human |              | Male   | 46 | Hospitalized | Oropharyngeal swab                          |
| hCoV-19/Mexico/PUE-InDRE_FB19622_S4513/2021 | EPI_ISL_3033366 | 21/06/21 | North America / Mexico / Puebla     | Human |              | Female | 43 | Hospitalized | Oropharyngeal swab                          |
| hCoV-19/Mexico/PUE-InDRE_FB19629_S4514/2021 | EPI_ISL_3033367 | 22/06/21 | North America / Mexico / Puebla     | Human |              | Female | 24 | Hospitalized | Oropharyngeal swab                          |
| hCoV-19/Mexico/PUE-InDRE_FB19630_S4515/2021 | EPI_ISL_3033368 | 22/06/21 | North America / Mexico / Puebla     | Human |              | Female | 24 | Hospitalized | Oropharyngeal swab                          |
| hCoV-19/Mexico/QUE-InDRE_F11371_S903/2021   | EPI_ISL_1423513 | 05/03/21 | North America / Mexico / Queretaro  | Human |              | Female | 76 | Hospitalized | Oropharyngeal swab                          |
| hCoV-19/Mexico/QUE-InDRE_FB12849_S1487/2021 | EPI_ISL_1805465 | 06/04/21 | North America / Mexico / Queretaro  | Human |              | Female | 17 | Hospitalized | Oropharyngeal swab                          |

|                                             |                 |          |                                       |       |        |    |              |                    |
|---------------------------------------------|-----------------|----------|---------------------------------------|-------|--------|----|--------------|--------------------|
| hCoV-19/Mexico/QUE-InDRE_FB14548_S2468/2021 | EPI_ISL_2455989 | 01/05/21 | North America / Mexico / Queretaro    | Human | Female | 41 | Hospitalized | Oropharyngeal swab |
| hCoV-19/Mexico/QUE-InDRE_FB14550_S2080/2021 | EPI_ISL_2283720 | 01/05/21 | North America / Mexico / Queretaro    | Human | Female | 50 | Hospitalized | Oropharyngeal swab |
| hCoV-19/Mexico/QUE-InDRE_FB15517_S2371/2021 | EPI_ISL_2455896 | 20/04/21 | North America / Mexico / Queretaro    | Human | Female | 33 | Hospitalized | Oropharyngeal swab |
| hCoV-19/Mexico/QUE-InDRE_FB15562_S2372/2021 | EPI_ISL_2455897 | 22/04/21 | North America / Mexico / Queretaro    | Human | Female | 41 | Hospitalized | Oropharyngeal swab |
| hCoV-19/Mexico/QUE-InDRE_FB15604_S2373/2021 | EPI_ISL_2455898 | 25/04/21 | North America / Mexico / Queretaro    | Human | Female | 40 | Hospitalized | Oropharyngeal swab |
| hCoV-19/Mexico/QUE-InDRE_FB15641_S2374/2021 | EPI_ISL_2455899 | 27/04/21 | North America / Mexico / Queretaro    | Human | Female | 31 | Hospitalized | Oropharyngeal swab |
| hCoV-19/Mexico/QUE-InDRE_FB15653_S2375/2021 | EPI_ISL_2455900 | 27/04/21 | North America / Mexico / Queretaro    | Human | Female | 36 | Hospitalized | Oropharyngeal swab |
| hCoV-19/Mexico/QUE-InDRE_FB15659_S2376/2021 | EPI_ISL_2455901 | 27/04/21 | North America / Mexico / Queretaro    | Human | Female | 48 | Hospitalized | Oropharyngeal swab |
| hCoV-19/Mexico/QUE-InDRE_FB15667_S2377/2021 | EPI_ISL_2455902 | 27/04/21 | North America / Mexico / Queretaro    | Human | Male   | 50 | Hospitalized | Oropharyngeal swab |
| hCoV-19/Mexico/QUE-InDRE_FB15699_S2378/2021 | EPI_ISL_2455903 | 30/04/21 | North America / Mexico / Queretaro    | Human | Male   | 32 | Hospitalized | Oropharyngeal swab |
| hCoV-19/Mexico/QUE-InDRE_FB15700_S2379/2021 | EPI_ISL_2455904 | 01/05/21 | North America / Mexico / Queretaro    | Human | Female | 41 | Hospitalized | Oropharyngeal swab |
| hCoV-19/Mexico/QUE-InDRE_FB15725_S2380/2021 | EPI_ISL_2455905 | 03/05/21 | North America / Mexico / Queretaro    | Human | Female | 41 | Hospitalized | Oropharyngeal swab |
| hCoV-19/Mexico/QUE-InDRE_FB15757_S2381/2021 | EPI_ISL_2455906 | 04/05/21 | North America / Mexico / Queretaro    | Human | Female | 35 | Hospitalized | Oropharyngeal swab |
| hCoV-19/Mexico/QUE-InDRE_FB15774_S2382/2021 | EPI_ISL_2455907 | 05/05/21 | North America / Mexico / Queretaro    | Human | Male   | 22 | Hospitalized | Oropharyngeal swab |
| hCoV-19/Mexico/QUE-InDRE_FB15777_S2383/2021 | EPI_ISL_2455908 | 05/05/21 | North America / Mexico / Queretaro    | Human | Male   | 57 | Hospitalized | Oropharyngeal swab |
| hCoV-19/Mexico/QUE-InDRE_FB15789_S2384/2021 | EPI_ISL_2455909 | 06/05/21 | North America / Mexico / Queretaro    | Human | Male   | 35 | Hospitalized | Oropharyngeal swab |
| hCoV-19/Mexico/QUE-InDRE_FB15790_S2385/2021 | EPI_ISL_2455910 | 06/05/21 | North America / Mexico / Queretaro    | Human | Female | 32 | Hospitalized | Oropharyngeal swab |
| hCoV-19/Mexico/QUE-InDRE_FB15807_S2386/2021 | EPI_ISL_2455911 | 13/05/21 | North America / Mexico / Queretaro    | Human | Female | 28 | Hospitalized | Oropharyngeal swab |
| hCoV-19/Mexico/QUE-InDRE_FB15808_S2387/2021 | EPI_ISL_2455912 | 14/05/21 | North America / Mexico / Queretaro    | Human | Female | 15 | Hospitalized | Oropharyngeal swab |
| hCoV-19/Mexico/QUE-InDRE_FB16146_S2439/2021 | EPI_ISL_2455963 | 17/05/21 | North America / Mexico / Queretaro    | Human | Male   | 34 | Hospitalized | Oropharyngeal swab |
| hCoV-19/Mexico/QUE-InDRE_FB16154_S2438/2021 | EPI_ISL_2455962 | 19/05/21 | North America / Mexico / Queretaro    | Human | Female | 27 | Hospitalized | Oropharyngeal swab |
| hCoV-19/Mexico/QUE-InDRE_FB16156_S2437/2021 | EPI_ISL_2455961 | 19/05/21 | North America / Mexico / Queretaro    | Human | Male   | 50 | Hospitalized | Oropharyngeal swab |
| hCoV-19/Mexico/QUE-InDRE_FB16157_S2436/2021 | EPI_ISL_2455960 | 19/05/21 | North America / Mexico / Queretaro    | Human | Female | 47 | Hospitalized | Oropharyngeal swab |
| hCoV-19/Mexico/QUE-InDRE_FB16164_S2460/2021 | EPI_ISL_2455981 | 17/05/21 | North America / Mexico / Queretaro    | Human | Female | 17 | Hospitalized | Oropharyngeal swab |
| hCoV-19/Mexico/QUE-InDRE_FB16431_S2481/2021 | EPI_ISL_2456002 | 24/05/21 | North America / Mexico / Queretaro    | Human | Male   | 48 | unknown      | Oropharyngeal swab |
| hCoV-19/Mexico/QUE-InDRE_FB16434_S2738/2021 | EPI_ISL_2533764 | 25/05/21 | North America / Mexico / Queretaro    | Human | Female | 33 | Hospitalized | Oropharyngeal swab |
| hCoV-19/Mexico/QUE-InDRE_FB16436_S2739/2021 | EPI_ISL_2533765 | 20/05/21 | North America / Mexico / Queretaro    | Human | Female | 49 | Hospitalized | Oropharyngeal swab |
| hCoV-19/Mexico/QUE-InDRE_FB16437_S2740/2021 | EPI_ISL_2533766 | 26/05/21 | North America / Mexico / Queretaro    | Human | Female | 52 | Hospitalized | Oropharyngeal swab |
| hCoV-19/Mexico/QUE-InDRE_FB16868_S3113/2021 | EPI_ISL_2663380 | 30/05/21 | North America / Mexico / Queretaro    | Human | Male   | 64 | Hospitalized | Oropharyngeal swab |
| hCoV-19/Mexico/QUE-InDRE_FB16876_S3114/2021 | EPI_ISL_2663381 | 04/06/21 | North America / Mexico / Queretaro    | Human | Male   | 49 | Hospitalized | Oropharyngeal swab |
| hCoV-19/Mexico/QUE-InDRE_FB16879_S3064/2021 | EPI_ISL_2709686 | 01/06/21 | North America / Mexico / Queretaro    | Human | Male   | 55 | Hospitalized | Oropharyngeal swab |
| hCoV-19/Mexico/QUE-InDRE_FB16881_S3065/2021 | EPI_ISL_2663331 | 03/06/21 | North America / Mexico / Queretaro    | Human | Female | 43 | Hospitalized | Oropharyngeal swab |
| hCoV-19/Mexico/QUE-InDRE_FB16884_S3066/2021 | EPI_ISL_2663332 | 04/06/21 | North America / Mexico / Queretaro    | Human | Female | 53 | Hospitalized | Oropharyngeal swab |
| hCoV-19/Mexico/QUE-InDRE_FB17253_S3534/2021 | EPI_ISL_2779049 | 10/06/21 | North America / Mexico / Queretaro    | Human | Male   | 12 | Hospitalized | Oropharyngeal swab |
| hCoV-19/Mexico/QUE-InDRE_FB17258_S3109/2021 | EPI_ISL_2663376 | 14/02/21 | North America / Mexico / Queretaro    | Human | Male   | 59 | Hospitalized | Oropharyngeal swab |
| hCoV-19/Mexico/QUE-InDRE_FB17259_S3110/2021 | EPI_ISL_2663377 | 10/06/21 | North America / Mexico / Queretaro    | Human | Female | 31 | Hospitalized | Oropharyngeal swab |
| hCoV-19/Mexico/QUE-InDRE_FB18359_S4142/2021 | EPI_ISL_2920713 | 25/06/21 | North America / Mexico / Queretaro    | Human | Female | 15 | Hospitalized | Oropharyngeal swab |
| hCoV-19/Mexico/ROO-InDRE_FB12917_S1492/2021 | EPI_ISL_1805470 | 02/04/21 | North America / Mexico / Quintana Roc | Human | Male   | 53 | Hospitalized | Oropharyngeal swab |
| hCoV-19/Mexico/ROO-InDRE_FB13273_S1503/2021 | EPI_ISL_1805481 | 06/04/21 | North America / Mexico / Quintana Roc | Human | Male   | 53 | Deceased     | Oropharyngeal swab |
| hCoV-19/Mexico/ROO-InDRE_FB13727_S1740/2021 | EPI_ISL_2101879 | 17/04/21 | North America / Mexico / Quintana Roc | Human | Female | 43 | Hospitalized | Oropharyngeal swab |
| hCoV-19/Mexico/ROO-InDRE_FB14100_S1759/2021 | EPI_ISL_2101898 | 21/04/21 | North America / Mexico / Quintana Roc | Human | Female | 74 | Hospitalized | Oropharyngeal swab |
| hCoV-19/Mexico/ROO-InDRE_FB14101_S1760/2021 | EPI_ISL_2101899 | 20/04/21 | North America / Mexico / Quintana Roc | Human | Male   | 85 | Deceased     | Oropharyngeal swab |
| hCoV-19/Mexico/ROO-InDRE_FB16369_S2476/2021 | EPI_ISL_2455997 | 15/05/21 | North America / Mexico / Quintana Roc | Human | Female | 46 | unknown      | Oropharyngeal swab |
| hCoV-19/Mexico/ROO-InDRE_FB16793_S2778/2021 | EPI_ISL_2533804 | 26/05/21 | North America / Mexico / Quintana Roc | Human | Male   | 58 | Hospitalized | Oropharyngeal swab |
| hCoV-19/Mexico/ROO-InDRE_FB16795_S2779/2021 | EPI_ISL_2533805 | 26/05/21 | North America / Mexico / Quintana Roc | Human | Female | 46 | Hospitalized | Oropharyngeal swab |
| hCoV-19/Mexico/ROO-InDRE_FB17190_S3089/2021 | EPI_ISL_2663356 | 03/06/21 | North America / Mexico / Quintana Roc | Human | Male   | 42 | Hospitalized | Oropharyngeal swab |
| hCoV-19/Mexico/ROO-InDRE_FB17192_S3090/2021 | EPI_ISL_2663357 | 01/06/21 | North America / Mexico / Quintana Roc | Human | Female | 30 | Hospitalized | Oropharyngeal swab |
| hCoV-19/Mexico/ROO-InDRE_FB19165_S4499/2021 | EPI_ISL_3033353 | 21/06/21 | North America / Mexico / Quintana Roc | Human | Male   | 55 | Hospitalized | Oropharyngeal swab |
| hCoV-19/Mexico/ROO-INMEGEN-05-06-205/2021   | EPI_ISL_2603694 | 01/06/21 | North America / Mexico / Quintana Roc | Human | Female | 46 | unknown      | Oropharyngeal swab |
| hCoV-19/Mexico/ROO-INMEGEN-05-06-212/2021   | EPI_ISL_2603700 | 01/06/21 | North America / Mexico / Quintana Roc | Human | Male   | 31 | unknown      | Oropharyngeal swab |
| hCoV-19/Mexico/ROO-INMEGEN-05-06-268/2021   | EPI_ISL_2603738 | 31/05/21 | North America / Mexico / Quintana Roc | Human | Male   | 34 | unknown      | Oropharyngeal swab |
| hCoV-19/Mexico/ROO-INMEGEN-06-01-197/2021   | EPI_ISL_2616800 | 02/06/21 | North America / Mexico / Quintana Roc | Human | Female | 39 | unknown      | Oropharyngeal swab |



|                                           |                 |          |                                           |       |         |         |         |                     |
|-------------------------------------------|-----------------|----------|-------------------------------------------|-------|---------|---------|---------|---------------------|
| hCoV-19/Mexico/ROO-INMEGEN-06-01-205/2021 | EPI_ISL_2616938 | 01/06/21 | North America / Mexico / Quintana Roc     | Human | Male    | 27      | unknown | Oropharyngeal swab  |
| hCoV-19/Mexico/ROO-INMEGEN-06-01-212/2021 | EPI_ISL_2616851 | 02/06/21 | North America / Mexico / Quintana Roc     | Human | Male    | 42      | unknown | Oropharyngeal swab  |
| hCoV-19/Mexico/ROO-INMEGEN-06-01-220/2021 | EPI_ISL_2616979 | 02/06/21 | North America / Mexico / Quintana Roc     | Human | Male    | 51      | unknown | Oropharyngeal swab  |
| hCoV-19/Mexico/ROO-INMEGEN-06-01-224/2021 | EPI_ISL_2616981 | 02/06/21 | North America / Mexico / Quintana Roc     | Human | Female  | 38      | unknown | Oropharyngeal swab  |
| hCoV-19/Mexico/ROO-INMEGEN-06-01-233/2021 | EPI_ISL_2616887 | 03/06/21 | North America / Mexico / Quintana Roc     | Human | Male    | 52      | unknown | Oropharyngeal swab  |
| hCoV-19/Mexico/ROO-INMEGEN-06-01-241/2021 | EPI_ISL_2616867 | 03/06/21 | North America / Mexico / Quintana Roc     | Human | Male    | 35      | unknown | Oropharyngeal swab  |
| hCoV-19/Mexico/ROO-INMEGEN-06-01-253/2021 | EPI_ISL_2616898 | 01/06/21 | North America / Mexico / Quintana Roc     | Human | Female  | 37      | unknown | Oropharyngeal swab  |
| hCoV-19/Mexico/ROO-INMEGEN-06-01-268/2021 | EPI_ISL_2616994 | 02/06/21 | North America / Mexico / Quintana Roc     | Human | Male    | 38      | unknown | Oropharyngeal swab  |
| hCoV-19/Mexico/ROO-INMEGEN-06-01-301/2021 | EPI_ISL_2616969 | 03/06/21 | North America / Mexico / Quintana Roc     | Human | Female  | 11      | unknown | Oropharyngeal swab  |
| hCoV-19/Mexico/ROO-INMEGEN-06-01-309/2021 | EPI_ISL_2616841 | 03/06/21 | North America / Mexico / Quintana Roc     | Human | Female  | 39      | unknown | Oropharyngeal swab  |
| hCoV-19/Mexico/ROO-INMEGEN-06-01-322/2021 | EPI_ISL_2616965 | 03/06/21 | North America / Mexico / Quintana Roc     | Human | Female  | 28      | unknown | Oropharyngeal swab  |
| hCoV-19/Mexico/ROO-INMEGEN-06-01-342/2021 | EPI_ISL_2616963 | 04/06/21 | North America / Mexico / Quintana Roc     | Human | Male    | 53      | unknown | Oropharyngeal swab  |
| hCoV-19/Mexico/ROO-INMEGEN-06-01-353/2021 | EPI_ISL_2616971 | 05/06/21 | North America / Mexico / Quintana Roc     | Human | Male    | 38      | unknown | Oropharyngeal swab  |
| hCoV-19/Mexico/ROO-INMEGEN-06-02-104/2021 | EPI_ISL_2692631 | 07/06/21 | North America / Mexico / Quintana Roc     | Human | Male    | 22      | unknown | Oropharyngeal swab  |
| hCoV-19/Mexico/ROO-INMEGEN-06-02-106/2021 | EPI_ISL_2692633 | 08/06/21 | North America / Mexico / Quintana Roc     | Human | Male    | 48      | unknown | Oropharyngeal swab  |
| hCoV-19/Mexico/ROO-INMEGEN-06-02-130/2021 | EPI_ISL_2692651 | 08/06/21 | North America / Mexico / Quintana Roc     | Human | Female  | 40      | unknown | Oropharyngeal swab  |
| hCoV-19/Mexico/ROO-INMEGEN-06-02-146/2021 | EPI_ISL_2692665 | 08/06/21 | North America / Mexico / Quintana Roc     | Human | Female  | 38      | unknown | Oropharyngeal swab  |
| hCoV-19/Mexico/ROO-INMEGEN-06-02-183/2021 | EPI_ISL_2692696 | 07/06/21 | North America / Mexico / Quintana Roc     | Human | Male    | 43      | unknown | Oropharyngeal swab  |
| hCoV-19/Mexico/ROO-INMEGEN-06-02-320/2021 | EPI_ISL_2692807 | 01/06/21 | North America / Mexico / Quintana Roc     | Human | Male    | 30      | unknown | Oropharyngeal swab  |
| hCoV-19/Mexico/ROO-INMEGEN-06-02-40/2021  | EPI_ISL_2692575 | 05/06/21 | North America / Mexico / Quintana Roc     | Human | Female  | 35      | unknown | Oropharyngeal swab  |
| hCoV-19/Mexico/ROO-INMEGEN-06-02-58/2021  | EPI_ISL_2692591 | 06/06/21 | North America / Mexico / Quintana Roc     | Human | Male    | 47      | unknown | Oropharyngeal swab  |
| hCoV-19/Mexico/ROO-INMEGEN-06-02-66/2021  | EPI_ISL_2692598 | 06/06/21 | North America / Mexico / Quintana Roc     | Human | Female  | 30      | unknown | Oropharyngeal swab  |
| hCoV-19/Mexico/ROO-INMEGEN-06-02-69/2021  | EPI_ISL_2692601 | 07/06/21 | North America / Mexico / Quintana Roc     | Human | Female  | 45      | unknown | Oropharyngeal swab  |
| hCoV-19/Mexico/ROO-INMEGEN-06-02-7/2021   | EPI_ISL_2692545 | 07/06/21 | North America / Mexico / Quintana Roc     | Human | Female  | 42      | unknown | Oropharyngeal swab  |
| hCoV-19/Mexico/ROO-INMEGEN-06-02-77/2021  | EPI_ISL_2692607 | 07/06/21 | North America / Mexico / Quintana Roc     | Human | Male    | 19      | unknown | Oropharyngeal swab  |
| hCoV-19/Mexico/ROO-INMEGEN-06-02-82/2021  | EPI_ISL_2692612 | 05/06/21 | North America / Mexico / Quintana Roc     | Human | Male    | 29      | unknown | Oropharyngeal swab  |
| hCoV-19/Mexico/ROO-INMEGEN-06-02-99/2021  | EPI_ISL_2692627 | 08/06/21 | North America / Mexico / Quintana Roc     | Human | Female  | 39      | unknown | Oropharyngeal swab  |
| hCoV-19/Mexico/ROO-INMEGEN-06-03-289/2021 | EPI_ISL_2810251 | 09/06/21 | North America / Mexico / Quintana Roc     | Human | Male    | 23      | unknown | Oropharyngeal swab  |
| hCoV-19/Mexico/ROO-INMEGEN-06-03-296/2021 | EPI_ISL_2810258 | 08/06/21 | North America / Mexico / Quintana Roc     | Human | Male    | 54      | unknown | Oropharyngeal swab  |
| hCoV-19/Mexico/ROO-INMEGEN-06-03-320/2021 | EPI_ISL_2810278 | 09/06/21 | North America / Mexico / Quintana Roc     | Human | Male    | 50      | unknown | Oropharyngeal swab  |
| hCoV-19/Mexico/ROO-INMEGEN-06-04-14/2021  | EPI_ISL_2894164 | 10/06/21 | North America / Mexico / Quintana Roc     | Human | Male    | 26      | unknown | Oropharyngeal swab  |
| hCoV-19/Mexico/ROO-INMEGEN-06-04-313/2021 | EPI_ISL_2894360 | 11/06/21 | North America / Mexico / Quintana Roc     | Human | Female  | 27      | unknown | Oropharyngeal swab  |
| hCoV-19/Mexico/ROO-INMEGEN-06-04-316/2021 | EPI_ISL_2894363 | 11/06/21 | North America / Mexico / Quintana Roc     | Human | Female  | 55      | unknown | Oropharyngeal swab  |
| hCoV-19/Mexico/ROO-INMEGEN-06-04-317/2021 | EPI_ISL_2894364 | 11/06/21 | North America / Mexico / Quintana Roc     | Human | Female  | 32      | unknown | Oropharyngeal swab  |
| hCoV-19/Mexico/ROO-INMEGEN-06-04-320/2021 | EPI_ISL_2894366 | 11/06/21 | North America / Mexico / Quintana Roc     | Human | Female  | 41      | unknown | Oropharyngeal swab  |
| hCoV-19/Mexico/ROO-INMEGEN-06-04-321/2021 | EPI_ISL_2894367 | 12/06/21 | North America / Mexico / Quintana Roc     | Human | Female  | 32      | unknown | Oropharyngeal swab  |
| hCoV-19/Mexico/ROO-INMEGEN-06-04-322/2021 | EPI_ISL_2894368 | 12/06/21 | North America / Mexico / Quintana Roc     | Human | Male    | 46      | unknown | Oropharyngeal swab  |
| hCoV-19/Mexico/ROO-INMEGEN-06-04-323/2021 | EPI_ISL_2894369 | 12/06/21 | North America / Mexico / Quintana Roc     | Human | Male    | 43      | unknown | Oropharyngeal swab  |
| hCoV-19/Mexico/ROO-INMEGEN-06-04-54/2021  | EPI_ISL_2894198 | 10/06/21 | North America / Mexico / Quintana Roc     | Human | Male    | 29      | unknown | Oropharyngeal swab  |
| hCoV-19/Mexico/ROO-INMEGEN-06-04-62/2021  | EPI_ISL_2894206 | 10/06/21 | North America / Mexico / Quintana Roc     | Human | Female  | 75      | unknown | Oropharyngeal swab  |
| hCoV-19/Mexico/ROO-INMEGEN-06-04-7/2021   | EPI_ISL_2894157 | 10/06/21 | North America / Mexico / Quintana Roc     | Human | Male    | 31      | unknown | Oropharyngeal swab  |
| hCoV-19/Mexico/ROO-INMEGEN-16-288/2021    | EPI_ISL_2978599 | 22/06/21 | North America / Mexico / Quintana Roc     | Human | Male    | 23      | unknown | Oropharyngeal swab  |
| hCoV-19/Mexico/ROO-INMEGEN-16-295/2021    | EPI_ISL_2978606 | 22/06/21 | North America / Mexico / Quintana Roc     | Human | Male    | 51      | unknown | Oropharyngeal swab  |
| hCoV-19/Mexico/ROO-INMEGEN-16-319/2021    | EPI_ISL_2978626 | 23/06/21 | North America / Mexico / Quintana Roc     | Human | Female  | 14      | unknown | Oropharyngeal swab  |
| hCoV-19/Mexico/ROO-INMEGEN-16-350/2021    | EPI_ISL_2978654 | 23/06/21 | North America / Mexico / Quintana Roc     | Human | Male    | 28      | unknown | Oropharyngeal swab  |
| hCoV-19/Mexico/SEARCH-101109/2021         | EPI_ISL_2329458 | 05/05/21 | America / Mexico / Baja California / Tij  | Human | unknown | unknown | unknown | Nasopharyngeal swab |
| hCoV-19/Mexico/SEARCH-101405/2021         | EPI_ISL_2422818 | 10/05/21 | America / Mexico / Baja California / Tij  | Human | unknown | unknown | unknown | Oropharyngeal swab  |
| hCoV-19/Mexico/SEARCH-101440/2021         | EPI_ISL_2422832 | 11/05/21 | America / Mexico / Baja California / Tij  | Human | unknown | unknown | unknown | Oropharyngeal swab  |
| hCoV-19/Mexico/SIN_CIAD_HJ1385/2021       | EPI_ISL_2026411 | 05/04/21 | North America / Mexico / Sinaloa / Mazatl | Human | Male    | 62      | unknown | Oropharyngeal swab  |
| hCoV-19/Mexico/SIN_CIAD_HJ1490/2021       | EPI_ISL_2026413 | 19/04/21 | North America / Mexico / Sinaloa / Mazatl | Human | Male    | 57      | unknown | Oropharyngeal swab  |
| hCoV-19/Mexico/SIN_CIAD_HJ1500/2021       | EPI_ISL_2026415 | 19/04/21 | North America / Mexico / Sinaloa / Mazatl | Human | Male    | 48      | unknown | Oropharyngeal swab  |
| hCoV-19/Mexico/SIN_CIAD_HJ1512/2021       | EPI_ISL_2026417 | 20/04/21 | North America / Mexico / Sinaloa / Mazatl | Human | Female  | 47      | unknown | Oropharyngeal swab  |

|                                             |                 |          |                                         |       |        |    |              |                    |
|---------------------------------------------|-----------------|----------|-----------------------------------------|-------|--------|----|--------------|--------------------|
| hCoV-19/Mexico/SIN_CIAD_HJ1592/2021         | EPI_ISL_2249239 | 04/05/21 | rth America / Mexico / Sinaloa / Mazatl | Human | Male   | 38 | unknown      | Oropharyngeal swab |
| hCoV-19/Mexico/SIN_CIAD_HJ1599/2021         | EPI_ISL_2249241 | 06/05/21 | rth America / Mexico / Sinaloa / Mazatl | Human | Male   | 52 | unknown      | Oropharyngeal swab |
| hCoV-19/Mexico/SIN_CIAD_HJ1602/2021         | EPI_ISL_2249242 | 06/05/21 | rth America / Mexico / Sinaloa / Mazatl | Human | Male   | 37 | unknown      | Oropharyngeal swab |
| hCoV-19/Mexico/SIN_CIAD_HJ1603/2021         | EPI_ISL_2249243 | 06/05/21 | rth America / Mexico / Sinaloa / Mazatl | Human | Female | 54 | unknown      | Oropharyngeal swab |
| hCoV-19/Mexico/SIN_CIAD_HJ1616/2021         | EPI_ISL_2249254 | 10/05/21 | rth America / Mexico / Sinaloa / Mazatl | Human | Female | 61 | unknown      | Oropharyngeal swab |
| hCoV-19/Mexico/SIN_CIAD_ID2302/2021         | EPI_ISL_2249234 | 03/05/21 | rth America / Mexico / Sinaloa / Mazatl | Human | Female | 75 | unknown      | Oropharyngeal swab |
| hCoV-19/Mexico/SIN_CIAD_S6572/2021          | EPI_ISL_2026422 | 15/04/21 | rth America / Mexico / Sinaloa / Mazatl | Human | Female | 16 | unknown      | Oropharyngeal swab |
| hCoV-19/Mexico/SIN_CIAD_S6600/2021          | EPI_ISL_2026432 | 20/04/21 | rth America / Mexico / Sinaloa / Mazatl | Human | Male   | 43 | unknown      | Oropharyngeal swab |
| hCoV-19/Mexico/SIN_CIAD_S6625/2021          | EPI_ISL_2026420 | 22/04/21 | rth America / Mexico / Sinaloa / Mazatl | Human | Male   | 57 | unknown      | Oropharyngeal swab |
| hCoV-19/Mexico/SIN_CIAD_S6643/2021          | EPI_ISL_2026418 | 26/04/21 | rth America / Mexico / Sinaloa / Mazatl | Human | Female | 57 | unknown      | Oropharyngeal swab |
| hCoV-19/Mexico/SIN_CIAD_S6662/2021          | EPI_ISL_2249230 | 28/04/21 | rth America / Mexico / Sinaloa / Mazatl | Human | Male   | 50 | unknown      | Oropharyngeal swab |
| hCoV-19/Mexico/SIN_CIAD_S6698/2021          | EPI_ISL_2249236 | 03/05/21 | rth America / Mexico / Sinaloa / Mazatl | Human | Male   | 23 | unknown      | Oropharyngeal swab |
| hCoV-19/Mexico/SIN_CIAD_S6699/2021          | EPI_ISL_2277642 | 03/05/21 | rth America / Mexico / Sinaloa / Mazatl | Human | Female | 68 | unknown      | Oropharyngeal swab |
| hCoV-19/Mexico/SIN_CIAD_S6706/2021          | EPI_ISL_2249240 | 04/05/21 | rth America / Mexico / Sinaloa / Mazatl | Human | Male   | 52 | unknown      | Oropharyngeal swab |
| hCoV-19/Mexico/SIN_CIAD_S6741/2021          | EPI_ISL_2249251 | 07/05/21 | rth America / Mexico / Sinaloa / Mazatl | Human | Female | 79 | unknown      | Oropharyngeal swab |
| hCoV-19/Mexico/SIN-InDRE_FB14031_S2069/2021 | EPI_ISL_2283709 | 24/04/21 | North America / Mexico / Sinaloa        | Human | Female | 19 | Hospitalized | Oropharyngeal swab |
| hCoV-19/Mexico/SIN-InDRE_FB14032_S2070/2021 | EPI_ISL_2283710 | 22/04/21 | North America / Mexico / Sinaloa        | Human | Male   | 26 | Hospitalized | Oropharyngeal swab |
| hCoV-19/Mexico/SIN-InDRE_FB14033_S1757/2021 | EPI_ISL_2101896 | 23/04/21 | North America / Mexico / Sinaloa        | Human | Male   | 21 | Hospitalized | Oropharyngeal swab |
| hCoV-19/Mexico/SIN-InDRE_FB15070_S2058/2021 | EPI_ISL_2283700 | 03/05/21 | North America / Mexico / Sinaloa        | Human | Male   | 59 | Hospitalized | Oropharyngeal swab |
| hCoV-19/Mexico/SIN-InDRE_FB15071_S2059/2021 | EPI_ISL_2283701 | 03/05/21 | North America / Mexico / Sinaloa        | Human | Female | 29 | Hospitalized | Oropharyngeal swab |
| hCoV-19/Mexico/SIN-InDRE_FB15074_S2060/2021 | EPI_ISL_2283702 | 30/04/21 | North America / Mexico / Sinaloa        | Human | Female | 57 | Deceased     | Oropharyngeal swab |
| hCoV-19/Mexico/SIN-InDRE_FB15075_S2061/2021 | EPI_ISL_2283703 | 05/05/21 | North America / Mexico / Sinaloa        | Human | Male   | 19 | Hospitalized | Oropharyngeal swab |
| hCoV-19/Mexico/SIN-InDRE_FB16917_S3067/2021 | EPI_ISL_2663333 | 31/05/21 | North America / Mexico / Sinaloa        | Human | Male   | 58 | Hospitalized | Oropharyngeal swab |
| hCoV-19/Mexico/SIN-InDRE_FB16918_S3068/2021 | EPI_ISL_2663334 | 02/06/21 | North America / Mexico / Sinaloa        | Human | Female | 42 | Hospitalized | Oropharyngeal swab |
| hCoV-19/Mexico/SIN-InDRE_FB17388_S3483/2021 | EPI_ISL_2778998 | 09/06/21 | North America / Mexico / Sinaloa        | Human | Male   | 31 | Hospitalized | Oropharyngeal swab |
| hCoV-19/Mexico/SIN-InDRE_FB17473_S3490/2021 | EPI_ISL_2779005 | 08/06/21 | North America / Mexico / Sinaloa        | Human | Male   | 63 | Hospitalized | Oropharyngeal swab |
| hCoV-19/Mexico/SIN-InDRE_FB17477_S3491/2021 | EPI_ISL_2779006 | 08/06/21 | North America / Mexico / Sinaloa        | Human | Female | 36 | Hospitalized | Oropharyngeal swab |
| hCoV-19/Mexico/SIN-InDRE_FB17478_S3492/2021 | EPI_ISL_2779007 | 08/06/21 | North America / Mexico / Sinaloa        | Human | Male   | 11 | Hospitalized | Oropharyngeal swab |
| hCoV-19/Mexico/SIN-InDRE_FB18120_S3959/2021 | EPI_ISL_2858973 | 16/06/21 | North America / Mexico / Sinaloa        | Human | Female | 71 | Hospitalized | Oropharyngeal swab |
| hCoV-19/Mexico/SIN-InDRE_FB19379_S4505/2021 | EPI_ISL_3033359 | 25/06/21 | North America / Mexico / Sinaloa        | Human | Female | 41 | Deceased     | Oropharyngeal swab |
| hCoV-19/Mexico/SIN-InDRE_FB19380_S4506/2021 | EPI_ISL_3033360 | 26/06/21 | North America / Mexico / Sinaloa        | Human | Female | 29 | Hospitalized | Oropharyngeal swab |
| hCoV-19/Mexico/SLP-InDRE_FB16030_S2429/2021 | EPI_ISL_2455953 | 17/05/21 | North America / Mexico / San Luis Poto: | Human | Female | 32 | Hospitalized | Oropharyngeal swab |
| hCoV-19/Mexico/SLP-InDRE_FB16823_S2780/2021 | EPI_ISL_2533806 | 19/05/21 | North America / Mexico / San Luis Poto: | Human | Male   | 45 | Hospitalized | Oropharyngeal swab |
| hCoV-19/Mexico/SLP-InDRE_FB18337_S3973/2021 | EPI_ISL_2858987 | 05/06/21 | North America / Mexico / San Luis Poto: | Human | Female | 44 | Hospitalized | Oropharyngeal swab |
| hCoV-19/Mexico/SLP-InDRE_FB18338_S3974/2021 | EPI_ISL_2858988 | 07/06/21 | North America / Mexico / San Luis Poto: | Human | Female | 52 | Hospitalized | Oropharyngeal swab |
| hCoV-19/Mexico/SLP-InDRE_FB18343_S3975/2021 | EPI_ISL_2858989 | 16/06/21 | North America / Mexico / San Luis Poto: | Human | Female | 14 | Hospitalized | Oropharyngeal swab |
| hCoV-19/Mexico/SLP-InDRE_FB18344_S3976/2021 | EPI_ISL_2858990 | 19/06/21 | North America / Mexico / San Luis Poto: | Human | Female | 23 | Hospitalized | Oropharyngeal swab |
| hCoV-19/Mexico/SON-H-3296/2021              | EPI_ISL_2894601 | 30/06/21 | North America / Mexico / Sonora         | Human | Female | 19 | unknown      | Oropharyngeal swab |
| hCoV-19/Mexico/SON-InDRE_FB13111_S1494/2021 | EPI_ISL_1805472 | 06/04/21 | North America / Mexico / Sonora         | Human | Male   | 58 | Hospitalized | Oropharyngeal swab |
| hCoV-19/Mexico/SON-InDRE_FB14085_S1758/2021 | EPI_ISL_2101897 | 25/04/21 | North America / Mexico / Sonora         | Human | Male   | 59 | Deceased     | Oropharyngeal swab |
| hCoV-19/Mexico/SON-InDRE_FB16350_S3474/2021 | EPI_ISL_2778989 | 23/05/21 | North America / Mexico / Sonora         | Human | Female | 45 | Hospitalized | Oropharyngeal swab |
| hCoV-19/Mexico/SON-InDRE_FB17150_S3136/2021 | EPI_ISL_2663403 | 30/05/21 | North America / Mexico / Sonora         | Human | Male   | 20 | Hospitalized | Oropharyngeal swab |
| hCoV-19/Mexico/SON-InDRE_FB17167_S3092/2021 | EPI_ISL_2663359 | 03/06/21 | North America / Mexico / Sonora         | Human | Male   | 33 | Hospitalized | Oropharyngeal swab |
| hCoV-19/Mexico/SON-InDRE_FB17171_S3087/2021 | EPI_ISL_2663354 | 04/06/21 | North America / Mexico / Sonora         | Human | Female | 60 | Hospitalized | Oropharyngeal swab |
| hCoV-19/Mexico/SON-InDRE_FB17175_S3088/2021 | EPI_ISL_2663355 | 30/05/21 | North America / Mexico / Sonora         | Human | Male   | 33 | Hospitalized | Oropharyngeal swab |
| hCoV-19/Mexico/SON-InDRE_FB18023_S3947/2021 | EPI_ISL_2858961 | 15/06/21 | North America / Mexico / Sonora         | Human | Female | 51 | Hospitalized | Oropharyngeal swab |
| hCoV-19/Mexico/SON-InDRE_FB18274_S4135/2021 | EPI_ISL_2920706 | 17/06/21 | North America / Mexico / Sonora         | Human | Male   | 16 | Hospitalized | Oropharyngeal swab |
| hCoV-19/Mexico/SON-InDRE_FB18291_S3967/2021 | EPI_ISL_2858981 | 14/06/21 | North America / Mexico / Sonora         | Human | Female | 82 | Hospitalized | Oropharyngeal swab |
| hCoV-19/Mexico/SON-InDRE_FB18293_S3968/2021 | EPI_ISL_2858982 | 17/06/21 | North America / Mexico / Sonora         | Human | Female | 63 | Hospitalized | Oropharyngeal swab |
| hCoV-19/Mexico/TAB-InDRE_FB16513_S2742/2021 | EPI_ISL_2533768 | 29/05/21 | North America / Mexico / Tabasco        | Human | Male   | 67 | Hospitalized | Oropharyngeal swab |
| hCoV-19/Mexico/TAB-InDRE_FB16514_S2743/2021 | EPI_ISL_2533769 | 29/05/21 | North America / Mexico / Tabasco        | Human | Female | 73 | Hospitalized | Oropharyngeal swab |
| hCoV-19/Mexico/TAB-InDRE_FB16926_S3069/2021 | EPI_ISL_2663336 | 01/06/21 | North America / Mexico / Tabasco        | Human | Female | 43 | Hospitalized | Oropharyngeal swab |



|                                             |                 |          |                                     |       |        |    |              |                    |
|---------------------------------------------|-----------------|----------|-------------------------------------|-------|--------|----|--------------|--------------------|
| hCoV-19/Mexico/TAB-InDRE_FB18527_S4151/2021 | EPI_ISL_2920722 | 25/06/21 | North America / Mexico / Tabasco    | Human | Female | 23 | Hospitalized | Oropharyngeal swab |
| hCoV-19/Mexico/TAB-InDRE_FB18528_S4152/2021 | EPI_ISL_2920723 | 25/06/21 | North America / Mexico / Tabasco    | Human | Female | 42 | Hospitalized | Oropharyngeal swab |
| hCoV-19/Mexico/TAB-InDRE_FB19055_S4487/2021 | EPI_ISL_3033341 | 28/06/21 | North America / Mexico / Tabasco    | Human | Female | 65 | Hospitalized | Oropharyngeal swab |
| hCoV-19/Mexico/TAB-InDRE_FB19065_S4488/2021 | EPI_ISL_3033342 | 28/06/21 | North America / Mexico / Tabasco    | Human | Female | 58 | Hospitalized | Oropharyngeal swab |
| hCoV-19/Mexico/TAB-InDRE_FB19070_S4489/2021 | EPI_ISL_3033343 | 28/06/21 | North America / Mexico / Tabasco    | Human | Female | 29 | Hospitalized | Oropharyngeal swab |
| hCoV-19/Mexico/TAB-InDRE_FB19071_S4490/2021 | EPI_ISL_3033344 | 28/06/21 | North America / Mexico / Tabasco    | Human | Male   | 32 | Hospitalized | Oropharyngeal swab |
| hCoV-19/Mexico/TAB-InDRE_FB19078_S4491/2021 | EPI_ISL_3033345 | 28/06/21 | North America / Mexico / Tabasco    | Human | Female | 38 | Hospitalized | Oropharyngeal swab |
| hCoV-19/Mexico/TAB-InDRE_FB19079_S4492/2021 | EPI_ISL_3033346 | 28/06/21 | North America / Mexico / Tabasco    | Human | Female | 57 | Hospitalized | Oropharyngeal swab |
| hCoV-19/Mexico/TAB-InDRE_FB19298_S4503/2021 | EPI_ISL_3033357 | 25/06/21 | North America / Mexico / Tabasco    | Human | Female | 49 | Hospitalized | Oropharyngeal swab |
| hCoV-19/Mexico/TAB-InDRE_FB19319_S4504/2021 | EPI_ISL_3033358 | 29/06/21 | North America / Mexico / Tabasco    | Human | Male   | 35 | Hospitalized | Oropharyngeal swab |
| hCoV-19/Mexico/TAB-InDRE_FB19485_S4510/2021 | EPI_ISL_3033363 | 29/06/21 | North America / Mexico / Tabasco    | Human | Female | 75 | Hospitalized | Oropharyngeal swab |
| hCoV-19/Mexico/TAB-InDRE_FB19500_S4511/2021 | EPI_ISL_3033364 | 01/07/21 | North America / Mexico / Tabasco    | Human | Male   | 49 | Hospitalized | Oropharyngeal swab |
| hCoV-19/Mexico/TAB-InDRE_FB19673_S4516/2021 | EPI_ISL_3033369 | 02/07/21 | North America / Mexico / Tabasco    | Human | Female | 33 | Hospitalized | Oropharyngeal swab |
| hCoV-19/Mexico/TAB-INMEGEN-05-06-245/2021   | EPI_ISL_2603720 | 01/06/21 | North America / Mexico / Tabasco    | Human | Male   | 39 | unknown      | Oropharyngeal swab |
| hCoV-19/Mexico/TAB-INMEGEN-05-06-253/2021   | EPI_ISL_2603724 | 01/06/21 | North America / Mexico / Tabasco    | Human | Female | 67 | unknown      | Oropharyngeal swab |
| hCoV-19/Mexico/TAB-INMEGEN-05-06-261/2021   | EPI_ISL_2603732 | 01/06/21 | North America / Mexico / Tabasco    | Human | Male   | 31 | unknown      | Oropharyngeal swab |
| hCoV-19/Mexico/TAB-INMEGEN-06-01-211/2021   | EPI_ISL_2616918 | 03/06/21 | North America / Mexico / Tabasco    | Human | Female | 19 | unknown      | Oropharyngeal swab |
| hCoV-19/Mexico/TAB-INMEGEN-06-01-219/2021   | EPI_ISL_2616902 | 03/06/21 | North America / Mexico / Tabasco    | Human | Male   | 34 | unknown      | Oropharyngeal swab |
| hCoV-19/Mexico/TAB-INMEGEN-06-01-243/2021   | EPI_ISL_2616917 | 03/06/21 | North America / Mexico / Tabasco    | Human | Male   | 39 | unknown      | Oropharyngeal swab |
| hCoV-19/Mexico/TAB-INMEGEN-06-01-348/2021   | EPI_ISL_2616988 | 04/06/21 | North America / Mexico / Tabasco    | Human | Male   | 33 | unknown      | Oropharyngeal swab |
| hCoV-19/Mexico/TAB-INMEGEN-06-01-364/2021   | EPI_ISL_2616972 | 04/06/21 | North America / Mexico / Tabasco    | Human | Female | 40 | unknown      | Oropharyngeal swab |
| hCoV-19/Mexico/TAB-INMEGEN-06-02-102/2021   | EPI_ISL_2692630 | 07/06/21 | North America / Mexico / Tabasco    | Human | Male   | 35 | unknown      | Oropharyngeal swab |
| hCoV-19/Mexico/TAB-INMEGEN-06-02-158/2021   | EPI_ISL_2692674 | 07/06/21 | North America / Mexico / Tabasco    | Human | Male   | 22 | unknown      | Oropharyngeal swab |
| hCoV-19/Mexico/TAB-INMEGEN-06-02-327/2021   | EPI_ISL_2692813 | 01/06/21 | North America / Mexico / Tabasco    | Human | Male   | 34 | unknown      | Oropharyngeal swab |
| hCoV-19/Mexico/TAB-INMEGEN-06-03-343/2021   | EPI_ISL_2810298 | 08/06/21 | North America / Mexico / Tabasco    | Human | Female | 27 | unknown      | Oropharyngeal swab |
| hCoV-19/Mexico/TAB-INMEGEN-06-03-352/2021   | EPI_ISL_2810305 | 09/06/21 | North America / Mexico / Tabasco    | Human | Male   | 39 | unknown      | Oropharyngeal swab |
| hCoV-19/Mexico/TAB-INMEGEN-06-03-360/2021   | EPI_ISL_2810312 | 09/06/21 | North America / Mexico / Tabasco    | Human | Male   | 52 | unknown      | Oropharyngeal swab |
| hCoV-19/Mexico/TAB-INMEGEN-06-04-326/2021   | EPI_ISL_2894372 | 12/06/21 | North America / Mexico / Tabasco    | Human | Male   | 40 | unknown      | Oropharyngeal swab |
| hCoV-19/Mexico/TAB-INMEGEN-06-04-329/2021   | EPI_ISL_2894375 | 12/06/21 | North America / Mexico / Tabasco    | Human | Male   | 68 | unknown      | Oropharyngeal swab |
| hCoV-19/Mexico/TAB-INMEGEN-16-306/2021      | EPI_ISL_2978616 | 14/06/21 | North America / Mexico / Tabasco    | Human | Male   | 33 | unknown      | Oropharyngeal swab |
| hCoV-19/Mexico/TAM-InDRE_236/2021           | EPI_ISL_961466  | 13/01/21 | North America / Mexico / Tamaulipas | Human | Female | 70 | Hospitalized | Oropharyngeal swab |
| hCoV-19/Mexico/TAM-InDRE_244/2021           | EPI_ISL_1008713 | 26/01/21 | North America / Mexico / Tamaulipas | Human | Female | 39 | Hospitalized | Pharyngeal swab    |
| hCoV-19/Mexico/TAM-InDRE_F108L_S569/2021    | EPI_ISL_1334382 | 24/02/21 | North America / Mexico / Tamaulipas | Human | Male   | 46 | Hospitalized | Oropharyngeal swab |
| hCoV-19/Mexico/TAM-InDRE_F111L_S570/2021    | EPI_ISL_1334383 | 01/03/21 | North America / Mexico / Tamaulipas | Human | Female | 35 | Hospitalized | Oropharyngeal swab |
| hCoV-19/Mexico/TAM-InDRE_F112L_S571/2021    | EPI_ISL_1334384 | 01/03/21 | North America / Mexico / Tamaulipas | Human | Male   | 41 | Hospitalized | Oropharyngeal swab |
| hCoV-19/Mexico/TAM-InDRE_F114L_S572/2021    | EPI_ISL_1334385 | 24/02/21 | North America / Mexico / Tamaulipas | Human | Male   | 44 | Hospitalized | Oropharyngeal swab |
| hCoV-19/Mexico/TAM-InDRE_F11757_S901/2021   | EPI_ISL_1423511 | 10/03/21 | North America / Mexico / Tamaulipas | Human | Female | 59 | Hospitalized | Oropharyngeal swab |
| hCoV-19/Mexico/TAM-InDRE_F86L_S567/2021     | EPI_ISL_1334380 | 17/02/21 | North America / Mexico / Tamaulipas | Human | Male   | 35 | Hospitalized | Oropharyngeal swab |
| hCoV-19/Mexico/TAM-InDRE_FB14042_S2071/2021 | EPI_ISL_2283711 | 15/04/21 | North America / Mexico / Tamaulipas | Human | Male   | 90 | Deceased     | Oropharyngeal swab |
| hCoV-19/Mexico/TAM-InDRE_FB14045_S2072/2021 | EPI_ISL_2283712 | 15/04/21 | North America / Mexico / Tamaulipas | Human | Female | 50 | Hospitalized | Oropharyngeal swab |
| hCoV-19/Mexico/TAM-InDRE_FB14051_S2073/2021 | EPI_ISL_2283713 | 17/04/21 | North America / Mexico / Tamaulipas | Human | Male   | 72 | Deceased     | Oropharyngeal swab |
| hCoV-19/Mexico/TAM-InDRE_FB14052_S2074/2021 | EPI_ISL_2283714 | 18/04/21 | North America / Mexico / Tamaulipas | Human | Male   | 44 | Deceased     | Oropharyngeal swab |
| hCoV-19/Mexico/TAM-InDRE_FB14054_S2075/2021 | EPI_ISL_2283715 | 20/04/21 | North America / Mexico / Tamaulipas | Human | Male   | 47 | Hospitalized | Oropharyngeal swab |
| hCoV-19/Mexico/TAM-InDRE_FB14060_S2076/2021 | EPI_ISL_2283716 | 16/04/21 | North America / Mexico / Tamaulipas | Human | Female | 37 | Hospitalized | Oropharyngeal swab |
| hCoV-19/Mexico/TAM-InDRE_FB14700_S2045/2021 | EPI_ISL_2283687 | 27/04/21 | North America / Mexico / Tamaulipas | Human | Female | 29 | Hospitalized | Oropharyngeal swab |
| hCoV-19/Mexico/TAM-InDRE_FB14924_S2391/2021 | EPI_ISL_2455916 | 05/05/21 | North America / Mexico / Tamaulipas | Human | Female | 74 | Hospitalized | Oropharyngeal swab |
| hCoV-19/Mexico/TAM-InDRE_FB14930_S2051/2021 | EPI_ISL_2283693 | 04/05/21 | North America / Mexico / Tamaulipas | Human | Female | 62 | Hospitalized | Oropharyngeal swab |
| hCoV-19/Mexico/TAM-InDRE_FB14936_S2591/2021 | EPI_ISL_2492487 | 05/05/21 | North America / Mexico / Tamaulipas | Human | Female | 42 | Hospitalized | Oropharyngeal swab |
| hCoV-19/Mexico/TAM-InDRE_FB14939_S2393/2021 | EPI_ISL_2455918 | 05/05/21 | North America / Mexico / Tamaulipas | Human | Female | 44 | Hospitalized | Oropharyngeal swab |
| hCoV-19/Mexico/TAM-InDRE_FB15935_S2398/2021 | EPI_ISL_2455923 | 06/05/21 | North America / Mexico / Tamaulipas | Human | Female | 33 | Hospitalized | Oropharyngeal swab |
| hCoV-19/Mexico/TAM-InDRE_FB15937_S2399/2021 | EPI_ISL_2455924 | 07/05/21 | North America / Mexico / Tamaulipas | Human | Male   | 56 | Hospitalized | Oropharyngeal swab |
| hCoV-19/Mexico/TAM-InDRE_FB15938_S2400/2021 | EPI_ISL_2455925 | 07/05/21 | North America / Mexico / Tamaulipas | Human | Female | 31 | Hospitalized | Oropharyngeal swab |



|                                             |                 |          |                                     |       |                |        |    |              |                                        |
|---------------------------------------------|-----------------|----------|-------------------------------------|-------|----------------|--------|----|--------------|----------------------------------------|
| hCoV-19/Mexico/TAM-InDRE_FB18138_S4125/2021 | EPI_ISL_2920696 | 09/06/21 | North America / Mexico / Tamaulipas | Human |                | Male   | 26 | Hospitalized | Oropharyngeal swab                     |
| hCoV-19/Mexico/TAM-InDRE_FB18142_S4126/2021 | EPI_ISL_2920697 | 15/06/21 | North America / Mexico / Tamaulipas | Human |                | Female | 59 | Hospitalized | Oropharyngeal swab                     |
| hCoV-19/Mexico/TAM-InDRE_FB18143_S4127/2021 | EPI_ISL_2920698 | 15/06/21 | North America / Mexico / Tamaulipas | Human |                | Male   | 63 | Hospitalized | Oropharyngeal swab                     |
| hCoV-19/Mexico/TAM-InDRE_FB18144_S4128/2021 | EPI_ISL_2920699 | 15/06/21 | North America / Mexico / Tamaulipas | Human |                | Female | 35 | Hospitalized | Oropharyngeal swab                     |
| hCoV-19/Mexico/TAM-InDRE_FB18145_S4129/2021 | EPI_ISL_2920700 | 15/06/21 | North America / Mexico / Tamaulipas | Human |                | Male   | 48 | Hospitalized | Oropharyngeal swab                     |
| hCoV-19/Mexico/TAM-InDRE_FB18146_S4130/2021 | EPI_ISL_2920701 | 16/06/21 | North America / Mexico / Tamaulipas | Human |                | Male   | 32 | Hospitalized | Oropharyngeal swab                     |
| hCoV-19/Mexico/TAM-InDRE_FB18874_S4154/2021 | EPI_ISL_2920725 | 16/06/21 | North America / Mexico / Tamaulipas | Human |                | Male   | 32 | Hospitalized | Oropharyngeal swab                     |
| hCoV-19/Mexico/TAM-InDRE_FB18878_S4155/2021 | EPI_ISL_2920726 | 18/06/21 | North America / Mexico / Tamaulipas | Human |                | Male   | 60 | Hospitalized | Oropharyngeal swab                     |
| hCoV-19/Mexico/TAM-InDRE_FB18879_S4156/2021 | EPI_ISL_2920727 | 18/06/21 | North America / Mexico / Tamaulipas | Human |                | Female | 36 | Hospitalized | Oropharyngeal swab                     |
| hCoV-19/Mexico/TAM-InDRE_FB18890_S4157/2021 | EPI_ISL_2920728 | 22/06/21 | North America / Mexico / Tamaulipas | Human |                | Female | 68 | Hospitalized | Oropharyngeal swab                     |
| hCoV-19/Mexico/TAM-InDRE_FB18891_S4158/2021 | EPI_ISL_2920729 | 22/06/21 | North America / Mexico / Tamaulipas | Human |                | Female | 46 | Hospitalized | Oropharyngeal swab                     |
| hCoV-19/Mexico/TAM-InDRE_FB18896_S4159/2021 | EPI_ISL_2920730 | 17/06/21 | North America / Mexico / Tamaulipas | Human |                | Male   | 57 | Hospitalized | Oropharyngeal swab                     |
| hCoV-19/Mexico/TAM-InDRE_FB18898_S4469/2021 | EPI_ISL_3033323 | 18/06/21 | North America / Mexico / Tamaulipas | Human |                | Female | 44 | Hospitalized | Oropharyngeal swab                     |
| hCoV-19/Mexico/TAM-InDRE_FB18904_S4470/2021 | EPI_ISL_3033324 | 18/06/21 | North America / Mexico / Tamaulipas | Human |                | Female | 45 | Hospitalized | Oropharyngeal swab                     |
| hCoV-19/Mexico/TAM-InDRE_FB18905_S4471/2021 | EPI_ISL_3033325 | 18/06/21 | North America / Mexico / Tamaulipas | Human |                | Female | 53 | Hospitalized | Oropharyngeal swab                     |
| hCoV-19/Mexico/TAM-InDRE_FB18909_S4472/2021 | EPI_ISL_3033326 | 21/06/21 | North America / Mexico / Tamaulipas | Human |                | Male   | 41 | Hospitalized | Oropharyngeal swab                     |
| hCoV-19/Mexico/TAM-InDRE_FB18910_S4473/2021 | EPI_ISL_3033327 | 21/06/21 | North America / Mexico / Tamaulipas | Human |                | Female | 49 | Hospitalized | Oropharyngeal swab                     |
| hCoV-19/Mexico/TAM-InDRE_FB18911_S4474/2021 | EPI_ISL_3033328 | 14/06/21 | North America / Mexico / Tamaulipas | Human |                | Female | 39 | Hospitalized | Oropharyngeal swab                     |
| hCoV-19/Mexico/TAM-InDRE_FB18912_S4475/2021 | EPI_ISL_3033329 | 14/06/21 | North America / Mexico / Tamaulipas | Human |                | Male   | 40 | Hospitalized | Oropharyngeal swab                     |
| hCoV-19/Mexico/TAM-InDRE_FB18922_S4476/2021 | EPI_ISL_3033330 | 22/06/21 | North America / Mexico / Tamaulipas | Human |                | Male   | 49 | Hospitalized | Oropharyngeal swab                     |
| hCoV-19/Mexico/TAM-InDRE_FB18925_S4477/2021 | EPI_ISL_3033331 | 23/06/21 | North America / Mexico / Tamaulipas | Human |                | Female | 55 | Hospitalized | Oropharyngeal swab                     |
| hCoV-19/Mexico/TAM-InDRE-94/2020            | EPI_ISL_794592  | 31/12/20 | North America / Mexico / Tamaulipas | Human | Travel history | Male   | 56 | Hospitalized | Nasopharyngeal and oropharyngeal swabs |
| hCoV-19/Mexico/TAM-INMEGEN-06-01-347/2021   | EPI_ISL_2616961 | 04/06/21 | North America / Mexico / Tamaulipas | Human |                | Female | 57 | unknown      | Oropharyngeal swab                     |
| hCoV-19/Mexico/VER-InDRE_FB14026_S1753/2021 | EPI_ISL_2101892 | 18/04/21 | North America / Mexico / Veracruz   | Human |                | Female | 49 | Hospitalized | Oropharyngeal swab                     |
| hCoV-19/Mexico/VER-InDRE_FB17431_S3930/2021 | EPI_ISL_2858944 | 12/06/21 | North America / Mexico / Veracruz   | Human |                | Male   | 68 | Deceased     | Oropharyngeal swab                     |
| hCoV-19/Mexico/VER-InDRE_FB17434_S3931/2021 | EPI_ISL_2858945 | 08/06/21 | North America / Mexico / Veracruz   | Human |                | Male   | 36 | Hospitalized | Oropharyngeal swab                     |
| hCoV-19/Mexico/VER-INMEGEN-05-06-207/2021   | EPI_ISL_2603696 | 31/05/21 | North America / Mexico / Veracruz   | Human |                | Male   | 38 | unknown      | Oropharyngeal swab                     |
| hCoV-19/Mexico/VER-INMEGEN-05-06-231/2021   | EPI_ISL_2603713 | 31/05/21 | North America / Mexico / Veracruz   | Human |                | Female | 34 | unknown      | Oropharyngeal swab                     |
| hCoV-19/Mexico/VER-INMEGEN-05-06-246/2021   | EPI_ISL_2881841 | 01/06/21 | North America / Mexico / Veracruz   | Human |                | Female | 34 | unknown      | Oropharyngeal swab                     |
| hCoV-19/Mexico/VER-INMEGEN-05-06-254/2021   | EPI_ISL_2603725 | 31/05/21 | North America / Mexico / Veracruz   | Human |                | Female | 54 | unknown      | Oropharyngeal swab                     |
| hCoV-19/Mexico/VER-INMEGEN-05-06-255/2021   | EPI_ISL_2603726 | 27/05/21 | North America / Mexico / Veracruz   | Human |                | Male   | 25 | unknown      | Oropharyngeal swab                     |
| hCoV-19/Mexico/VER-INMEGEN-06-01-368/2021   | EPI_ISL_2616973 | 05/06/21 | North America / Mexico / Veracruz   | Human |                | Male   | 25 | unknown      | Oropharyngeal swab                     |
| hCoV-19/Mexico/VER-INMEGEN-06-02-173/2021   | EPI_ISL_2692689 | 08/06/21 | North America / Mexico / Veracruz   | Human |                | Female | 25 | unknown      | Oropharyngeal swab                     |
| hCoV-19/Mexico/VER-INMEGEN-06-02-372/2021   | EPI_ISL_2692848 | 09/06/21 | North America / Mexico / Veracruz   | Human |                | Female | 38 | unknown      | Oropharyngeal swab                     |
| hCoV-19/Mexico/VER-INMEGEN-06-02-373/2021   | EPI_ISL_2692849 | 09/06/21 | North America / Mexico / Veracruz   | Human |                | Male   | 40 | unknown      | Oropharyngeal swab                     |
| hCoV-19/Mexico/VER-INMEGEN-06-02-374/2021   | EPI_ISL_2692850 | 09/06/21 | North America / Mexico / Veracruz   | Human |                | Male   | 47 | unknown      | Oropharyngeal swab                     |
| hCoV-19/Mexico/VER-INMEGEN-06-02-375/2021   | EPI_ISL_2692851 | 09/06/21 | North America / Mexico / Veracruz   | Human |                | Male   | 37 | unknown      | Oropharyngeal swab                     |
| hCoV-19/Mexico/VER-INMEGEN-06-02-376/2021   | EPI_ISL_2692852 | 09/06/21 | North America / Mexico / Veracruz   | Human |                | Female | 25 | unknown      | Oropharyngeal swab                     |
| hCoV-19/Mexico/VER-INMEGEN-06-04-13/2021    | EPI_ISL_2894163 | 09/06/21 | North America / Mexico / Veracruz   | Human |                | Female | 34 | unknown      | Oropharyngeal swab                     |
| hCoV-19/Mexico/VER-INMEGEN-06-04-287/2021   | EPI_ISL_2894334 | 12/06/21 | North America / Mexico / Veracruz   | Human |                | Female | 39 | unknown      | Oropharyngeal swab                     |
| hCoV-19/Mexico/VER-INMEGEN-06-04-324/2021   | EPI_ISL_2894370 | 13/06/21 | North America / Mexico / Veracruz   | Human |                | Male   | 30 | unknown      | Oropharyngeal swab                     |
| hCoV-19/Mexico/VER-INMEGEN-06-04-6/2021     | EPI_ISL_2894156 | 09/06/21 | North America / Mexico / Veracruz   | Human |                | Male   | 25 | unknown      | Oropharyngeal swab                     |
| hCoV-19/Mexico/VER-INMEGEN-16-284/2021      | EPI_ISL_2978595 | 14/06/21 | North America / Mexico / Veracruz   | Human |                | Female | 30 | unknown      | Oropharyngeal swab                     |
| hCoV-19/Mexico/VER-INMEGEN-16-302/2021      | EPI_ISL_2978612 | 16/06/21 | North America / Mexico / Veracruz   | Human |                | Female | 34 | unknown      | Oropharyngeal swab                     |
| hCoV-19/Mexico/VER-INMEGEN-16-310/2021      | EPI_ISL_2978619 | 16/06/21 | North America / Mexico / Veracruz   | Human |                | Female | 26 | unknown      | Oropharyngeal swab                     |
| hCoV-19/Mexico/VER-INMEGEN-16-322/2021      | EPI_ISL_2978629 | 14/06/21 | North America / Mexico / Veracruz   | Human |                | Male   | 19 | unknown      | Oropharyngeal swab                     |
| hCoV-19/Mexico/VER-INMEGEN-16-338/2021      | EPI_ISL_2978643 | 14/06/21 | North America / Mexico / Veracruz   | Human |                | Female | 60 | unknown      | Oropharyngeal swab                     |
| hCoV-19/Mexico/YUC-Biomedicos-6140701/2021  | EPI_ISL_2918940 | 14/06/21 | North America / Mexico / Yucatan    | Human |                | Female | 51 | Hospitalized | Nasopharyngeal swab                    |
| hCoV-19/Mexico/YUC-Biomedicos-6150004/2021  | EPI_ISL_2928339 | 15/06/21 | North America / Mexico / Yucatan    | Human | th America / M | Female | 34 | unknown      | Nasopharyngeal swab                    |
| hCoV-19/Mexico/YUC-Biomedicos-6220333/2021  | EPI_ISL_2928304 | 22/06/21 | North America / Mexico / Yucatan    | Human | th America / M | Male   | 49 | unknown      | Oropharyngeal swab                     |
| hCoV-19/Mexico/YUC-InDRE_F11421_S904/2021   | EPI_ISL_1423514 | 01/03/21 | North America / Mexico / Yucatan    | Human |                | Female | 67 | Hospitalized | Oropharyngeal swab                     |
| hCoV-19/Mexico/YUC-InDRE_F12194_S1195/2021  | EPI_ISL_1626802 | 22/03/21 | North America / Mexico / Yucatan    | Human |                | Female | 33 | Hospitalized | Oropharyngeal swab                     |







|                                             |                 |          |                                    |       |                |         |         |              |                    |
|---------------------------------------------|-----------------|----------|------------------------------------|-------|----------------|---------|---------|--------------|--------------------|
| hCoV-19/Mexico/YUC-NYGC-1163-SM/2021        | EPI_ISL_3023819 | 26/05/21 | North America / Mexico / Yucatan   | Human |                | unknown | unknown | unknown      | Oropharyngeal swab |
| hCoV-19/Mexico/YUC-NYGC-1206-SM/2021        | EPI_ISL_3023815 | 28/04/21 | North America / Mexico / Yucatan   | Human | Other: Merida  | Female  | 18      | Hospitalized | Oropharyngeal swab |
| hCoV-19/Mexico/YUC-NYGC-1211-SM/2021        | EPI_ISL_3023983 | 05/05/21 | North America / Mexico / Yucatan   | Human | Other: Merida  | unknown | 29      | Hospitalized | Oropharyngeal swab |
| hCoV-19/Mexico/YUC-NYGC-1225-SM/2021        | EPI_ISL_3023816 | 03/05/21 | North America / Mexico / Yucatan   | Human | Other: Merida  | Female  | 48      | Hospitalized | Oropharyngeal swab |
| hCoV-19/Mexico/YUC-NYGC-1232-SM/2021        | EPI_ISL_3023948 | 05/05/21 | North America / Mexico / Yucatan   | Human | Other: Merida  | Male    | 47      | unknown      | Oropharyngeal swab |
| hCoV-19/Mexico/YUC-NYGC-14211-21/2021       | EPI_ISL_3024031 | 17/03/21 | North America / Mexico / Yucatan   | Human | Other: Chema   | Female  | 54      | Hospitalized | Oropharyngeal swab |
| hCoV-19/Mexico/YUC-NYGC-14212-21/2021       | EPI_ISL_3024035 | 17/03/21 | North America / Mexico / Yucatan   | Human | Other: Chema   | Female  | 52      | Hospitalized | Oropharyngeal swab |
| hCoV-19/Mexico/YUC-NYGC-14715-21/2021       | EPI_ISL_3024078 | 02/03/21 | North America / Mexico / Yucatan   | Human | Other: Merida  | Female  | 38      | Hospitalized | Oropharyngeal swab |
| hCoV-19/Mexico/YUC-NYGC-15751-21/2021       | EPI_ISL_3024024 | 30/03/21 | North America / Mexico / Yucatan   | Human | Other: Tizimin | Male    | 29      | Hospitalized | Oropharyngeal swab |
| hCoV-19/Mexico/YUC-NYGC-8474-21/2021        | EPI_ISL_3024018 | 02/02/21 | North America / Mexico / Yucatan   | Human | Other: Merida  | Male    | 44      | Hospitalized | Oropharyngeal swab |
| hCoV-19/Mexico/ZAC-InDRE_FB10107_S573/2021  | EPI_ISL_1335757 | 15/02/21 | North America / Mexico / Zacatecas | Human |                | Female  | 40      | Hospitalized | Oropharyngeal swab |
| hCoV-19/Mexico/ZAC-InDRE_FB16088_S2458/2021 | EPI_ISL_2484166 | 18/05/21 | North America / Mexico / Zacatecas | Human |                | Female  | 79      | Deceased     | Oropharyngeal swab |
| hCoV-19/Mexico/ZAC-InDRE_FB17736_S4113/2021 | EPI_ISL_2920684 | 14/06/21 | North America / Mexico / Zacatecas | Human |                | Female  | 35      | Hospitalized | Oropharyngeal swab |

**Table S3.** Patient demographic and clinical characteristics of the sequences classified as B.1.1.519 collected in Mexico from January to June 2021.

| Virus name                               | Accession ID    | Collection date | Location                             | Host  | Gender | Patient age | Patient status | Specimen            |
|------------------------------------------|-----------------|-----------------|--------------------------------------|-------|--------|-------------|----------------|---------------------|
| hCoV-19/Mexico/CMX-INMEGEN-02-02-08/2021 | EPI_ISL_104053E | 29/01/21        | North America / Mexico / Mexico City | Human | Male   | 47          | unknown        | Nasopharyngeal swab |
| hCoV-19/Mexico/CMX-INMEGEN-02-02-10/2021 | EPI_ISL_104053E | 29/01/21        | North America / Mexico / Mexico City | Human | Female | 34          | unknown        | Nasopharyngeal swab |
| hCoV-19/Mexico/CMX-INMEGEN-02-02-15/2021 | EPI_ISL_1040537 | 29/01/21        | North America / Mexico / Mexico City | Human | Female | 29          | unknown        | Nasopharyngeal swab |
| hCoV-19/Mexico/CMX-INMEGEN-02-02-16/2021 | EPI_ISL_104053E | 29/01/21        | North America / Mexico / Mexico City | Human | Female | 37          | unknown        | Nasopharyngeal swab |
| hCoV-19/Mexico/CMX-INMEGEN-02-02-21/2021 | EPI_ISL_104053E | 28/01/21        | North America / Mexico / Mexico City | Human | Female | 45          | unknown        | Nasopharyngeal swab |
| hCoV-19/Mexico/CMX-INMEGEN-02-02-07/2021 | EPI_ISL_104054C | 27/01/21        | North America / Mexico / Mexico City | Human | Female | 49          | unknown        | Nasopharyngeal swab |
| hCoV-19/Mexico/CMX-INMEGEN-02-02-06/2021 | EPI_ISL_1040541 | 26/01/21        | North America / Mexico / Mexico City | Human | Female | 60          | unknown        | Nasopharyngeal swab |
| hCoV-19/Mexico/CMX-INMEGEN-02-02-09/2021 | EPI_ISL_1040542 | 26/01/21        | North America / Mexico / Mexico City | Human | Female | 36          | unknown        | Nasopharyngeal swab |
| hCoV-19/Mexico/CMX-INMEGEN-02-02-23/2021 | EPI_ISL_1040543 | 26/01/21        | North America / Mexico / Mexico City | Human | Female | 8           | unknown        | Nasopharyngeal swab |
| hCoV-19/Mexico/CMX-INMEGEN-02-02-14/2021 | EPI_ISL_1040544 | 25/01/21        | North America / Mexico / Mexico City | Human | Male   | 27          | unknown        | Nasopharyngeal swab |
| hCoV-19/Mexico/CMX-INMEGEN-02-02-22/2021 | EPI_ISL_104054E | 25/01/21        | North America / Mexico / Mexico City | Human | Female | 52          | unknown        | Nasopharyngeal swab |
| hCoV-19/Mexico/CMX-INMEGEN-02-02-05/2021 | EPI_ISL_1040547 | 24/01/21        | North America / Mexico / Mexico City | Human | Male   | 40          | unknown        | Nasopharyngeal swab |
| hCoV-19/Mexico/CMX-INMEGEN-02-02-13/2021 | EPI_ISL_104054E | 23/01/21        | North America / Mexico / Mexico City | Human | Male   | 70          | unknown        | Nasopharyngeal swab |
| hCoV-19/Mexico/CMX-INMEGEN-02-02-20/2021 | EPI_ISL_104055C | 23/01/21        | North America / Mexico / Mexico City | Human | Male   | 11          | unknown        | Nasopharyngeal swab |
| hCoV-19/Mexico/CMX-INMEGEN-02-02-12/2021 | EPI_ISL_1040552 | 22/01/21        | North America / Mexico / Mexico City | Human | Male   | 25          | unknown        | Nasopharyngeal swab |
| hCoV-19/Mexico/CMX-INMEGEN-02-02-19/2021 | EPI_ISL_1040553 | 22/01/21        | North America / Mexico / Mexico City | Human | Female | 51          | unknown        | Nasopharyngeal swab |
| hCoV-19/Mexico/CMX-INMEGEN-02-02-01/2021 | EPI_ISL_1040554 | 20/01/21        | North America / Mexico / Mexico City | Human | Female | 63          | unknown        | Nasopharyngeal swab |
| hCoV-19/Mexico/CMX-INMEGEN-02-02-02/2021 | EPI_ISL_104055E | 20/01/21        | North America / Mexico / Mexico City | Human | Male   | 32          | unknown        | Nasopharyngeal swab |
| hCoV-19/Mexico/CMX-INMEGEN-02-02-17/2021 | EPI_ISL_104055E | 20/01/21        | North America / Mexico / Mexico City | Human | Male   | 42          | unknown        | Nasopharyngeal swab |
| hCoV-19/Mexico/CMX-INMEGEN-01-04-11/2021 | EPI_ISL_104056C | 15/01/21        | North America / Mexico / Mexico City | Human | Male   | 58          | unknown        | Nasopharyngeal swab |
| hCoV-19/Mexico/CMX-INMEGEN-01-04-15/2021 | EPI_ISL_1040561 | 14/01/21        | North America / Mexico / Mexico City | Human | Female | 74          | unknown        | Nasopharyngeal swab |
| hCoV-19/Mexico/CMX-INMEGEN-01-04-12/2021 | EPI_ISL_1040562 | 15/01/21        | North America / Mexico / Mexico City | Human | Female | 58          | unknown        | Nasopharyngeal swab |
| hCoV-19/Mexico/CMX-INMEGEN-01-04-16/2021 | EPI_ISL_1040563 | 15/01/21        | North America / Mexico / Mexico City | Human | Female | 21          | unknown        | Nasopharyngeal swab |
| hCoV-19/Mexico/CMX-INMEGEN-01-04-13/2021 | EPI_ISL_104056E | 17/01/21        | North America / Mexico / Mexico City | Human | Female | 58          | unknown        | Nasopharyngeal swab |
| hCoV-19/Mexico/CMX-INMEGEN-01-04-05/2021 | EPI_ISL_104056E | 18/01/21        | North America / Mexico / Mexico City | Human | Male   | 11          | unknown        | Nasopharyngeal swab |
| hCoV-19/Mexico/CMX-INMEGEN-01-04-06/2021 | EPI_ISL_1040567 | 18/01/21        | North America / Mexico / Mexico City | Human | Female | 40          | unknown        | Nasopharyngeal swab |
| hCoV-19/Mexico/CMX-INMEGEN-01-04-08/2021 | EPI_ISL_104056E | 18/01/21        | North America / Mexico / Mexico City | Human | Female | 61          | unknown        | Nasopharyngeal swab |
| hCoV-19/Mexico/CMX-INMEGEN-01-04-14/2021 | EPI_ISL_104057C | 18/01/21        | North America / Mexico / Mexico City | Human | Male   | 38          | unknown        | Nasopharyngeal swab |
| hCoV-19/Mexico/CMX-INMEGEN-01-04-17/2021 | EPI_ISL_1040571 | 18/01/21        | North America / Mexico / Mexico City | Human | Male   | 20          | unknown        | Nasopharyngeal swab |
| hCoV-19/Mexico/CMX-INMEGEN-01-04-04/2021 | EPI_ISL_1040573 | 19/01/21        | North America / Mexico / Mexico City | Human | Male   | 29          | unknown        | Nasopharyngeal swab |
| hCoV-19/Mexico/CMX-INMEGEN-01-04-07/2021 | EPI_ISL_1040574 | 19/01/21        | North America / Mexico / Mexico City | Human | Male   | 60          | unknown        | Nasopharyngeal swab |
| hCoV-19/Mexico/CMX-INMEGEN-01-04-10/2021 | EPI_ISL_104057E | 20/01/21        | North America / Mexico / Mexico City | Human | Female | 23          | unknown        | Nasopharyngeal swab |
| hCoV-19/Mexico/CMX-INMEGEN-01-04-19/2021 | EPI_ISL_104057E | 20/01/21        | North America / Mexico / Mexico City | Human | Female | 56          | unknown        | Nasopharyngeal swab |
| hCoV-19/Mexico/CMX-INMEGEN-01-04-20/2021 | EPI_ISL_1040577 | 21/01/21        | North America / Mexico / Mexico City | Human | Male   | 52          | unknown        | Nasopharyngeal swab |
| hCoV-19/Mexico/CMX-INMEGEN-01-05-06/2021 | EPI_ISL_104057E | 19/01/21        | North America / Mexico / Mexico City | Human | Male   | 47          | unknown        | Nasopharyngeal swab |
| hCoV-19/Mexico/CMX-INMEGEN-01-05-07/2021 | EPI_ISL_104058C | 18/01/21        | North America / Mexico / Mexico City | Human | Male   | 26          | unknown        | Nasopharyngeal swab |
| hCoV-19/Mexico/CMX-INMEGEN-01-05-19/2021 | EPI_ISL_1040581 | 20/01/21        | North America / Mexico / Mexico City | Human | Male   | 27          | unknown        | Nasopharyngeal swab |
| hCoV-19/Mexico/CMX-INMEGEN-01-05-20/2021 | EPI_ISL_1040582 | 20/01/21        | North America / Mexico / Mexico City | Human | Male   | 68          | unknown        | Nasopharyngeal swab |
| hCoV-19/Mexico/CMX-INMEGEN-01-05-23/2021 | EPI_ISL_1040583 | 20/01/21        | North America / Mexico / Mexico City | Human | Male   | 42          | unknown        | Nasopharyngeal swab |
| hCoV-19/Mexico/CMX-INMEGEN-01-05-08/2021 | EPI_ISL_1040584 | 19/01/21        | North America / Mexico / Mexico City | Human | Female | 58          | unknown        | Nasopharyngeal swab |
| hCoV-19/Mexico/CMX-INMEGEN-01-05-11/2021 | EPI_ISL_104058E | 19/01/21        | North America / Mexico / Mexico City | Human | Male   | 28          | unknown        | Nasopharyngeal swab |











|                                          |                 |          |                                      |       |        |    |              |                    |
|------------------------------------------|-----------------|----------|--------------------------------------|-------|--------|----|--------------|--------------------|
| hCoV-19/Mexico/CMX-INMEGEN-02-12-23/2021 | EPI_ISL_1120895 | 15/02/21 | North America / Mexico / Mexico City | Human | Male   | 17 | unknown      | Oropharyngeal swab |
| hCoV-19/Mexico/CMX-INMEGEN-02-12-24/2021 | EPI_ISL_1120896 | 15/02/21 | North America / Mexico / Mexico City | Human | Female | 28 | unknown      | Oropharyngeal swab |
| hCoV-19/Mexico/CMX-INMEGEN-02-12-14/2021 | EPI_ISL_1133103 | 12/02/21 | North America / Mexico / Mexico City | Human | Male   | 15 | unknown      |                    |
| hCoV-19/Mexico/CMX-INMEGEN-02-10-04/2021 | EPI_ISL_113746C | 05/02/21 | North America / Mexico / Mexico City | Human | Female | 22 | unknown      | Oropharyngeal swab |
| hCoV-19/Mexico/CMX-INMEGEN-02-10-14/2021 | EPI_ISL_1137461 | 08/02/21 | North America / Mexico / Mexico City | Human | Male   | 32 | unknown      | Oropharyngeal swab |
| hCoV-19/Mexico/CMX-INMEGEN-02-10-01/2021 | EPI_ISL_1137462 | 06/02/21 | North America / Mexico / Mexico City | Human | Male   | 38 | unknown      | Oropharyngeal swab |
| hCoV-19/Mexico/CMX-INMEGEN-02-10-02/2021 | EPI_ISL_1137463 | 06/02/21 | North America / Mexico / Mexico City | Human | Male   | 35 | unknown      | Oropharyngeal swab |
| hCoV-19/Mexico/CMX-INMEGEN-02-10-03/2021 | EPI_ISL_1137464 | 07/02/21 | North America / Mexico / Mexico City | Human | Female | 27 | unknown      | Oropharyngeal swab |
| hCoV-19/Mexico/CMX-INMEGEN-02-10-06/2021 | EPI_ISL_1137465 | 06/02/21 | North America / Mexico / Mexico City | Human | Male   | 51 | unknown      | Oropharyngeal swab |
| hCoV-19/Mexico/CMX-INMEGEN-02-10-07/2021 | EPI_ISL_1137466 | 07/02/21 | North America / Mexico / Mexico City | Human | Male   | 18 | unknown      | Oropharyngeal swab |
| hCoV-19/Mexico/CMX-INMEGEN-02-10-09/2021 | EPI_ISL_113746E | 05/02/21 | North America / Mexico / Mexico City | Human | Female | 24 | unknown      | Oropharyngeal swab |
| hCoV-19/Mexico/CMX-INMEGEN-02-10-10/2021 | EPI_ISL_1137469 | 05/02/21 | North America / Mexico / Mexico City | Human | Female | 27 | unknown      | Oropharyngeal swab |
| hCoV-19/Mexico/CMX-INMEGEN-02-10-11/2021 | EPI_ISL_113747C | 05/02/21 | North America / Mexico / Mexico City | Human | Male   | 65 | unknown      | Oropharyngeal swab |
| hCoV-19/Mexico/CMX-INMEGEN-02-10-12/2021 | EPI_ISL_1137471 | 08/02/21 | North America / Mexico / Mexico City | Human | Male   | 44 | unknown      | Oropharyngeal swab |
| hCoV-19/Mexico/CMX-INMEGEN-02-10-13/2021 | EPI_ISL_1137472 | 08/02/21 | North America / Mexico / Mexico City | Human | Male   | 48 | unknown      | Oropharyngeal swab |
| hCoV-19/Mexico/CMX-INMEGEN-02-10-15/2021 | EPI_ISL_1137473 | 08/02/21 | North America / Mexico / Mexico City | Human | Female | 62 | unknown      | Oropharyngeal swab |
| hCoV-19/Mexico/CMX-INMEGEN-02-10-16/2021 | EPI_ISL_1137474 | 08/02/21 | North America / Mexico / Mexico City | Human | Female | 21 | unknown      | Oropharyngeal swab |
| hCoV-19/Mexico/QUE-InDRE_375/2021        | EPI_ISL_1168453 | 24/01/21 | North America / Mexico / Queretaro   | Human | Male   | 36 | Released     | Oropharyngeal swab |
| hCoV-19/Mexico/QUE-InDRE_376/2021        | EPI_ISL_1168454 | 24/01/21 | North America / Mexico / Queretaro   | Human | Male   | 34 | Released     | Oropharyngeal swab |
| hCoV-19/Mexico/QUE-InDRE_377/2021        | EPI_ISL_1168455 | 24/01/21 | North America / Mexico / Queretaro   | Human | Female | 32 | Released     | Oropharyngeal swab |
| hCoV-19/Mexico/QUE-InDRE_378/2021        | EPI_ISL_116845E | 24/01/21 | North America / Mexico / Queretaro   | Human | Female | 37 | Released     | Oropharyngeal swab |
| hCoV-19/Mexico/QUE-InDRE_379/2021        | EPI_ISL_1168457 | 24/01/21 | North America / Mexico / Queretaro   | Human | Male   | 73 | Deceased     | Oropharyngeal swab |
| hCoV-19/Mexico/QUE-InDRE_380/2021        | EPI_ISL_116845E | 25/01/21 | North America / Mexico / Queretaro   | Human | Female | 52 | Released     | Oropharyngeal swab |
| hCoV-19/Mexico/QUE-InDRE_381/2021        | EPI_ISL_116845E | 25/01/21 | North America / Mexico / Queretaro   | Human | Male   | 44 | Released     | Oropharyngeal swab |
| hCoV-19/Mexico/QUE-InDRE_384/2021        | EPI_ISL_1168462 | 25/01/21 | North America / Mexico / Queretaro   | Human | Male   | 41 | Released     | Oropharyngeal swab |
| hCoV-19/Mexico/QUE-InDRE_386/2021        | EPI_ISL_1168464 | 25/01/21 | North America / Mexico / Queretaro   | Human | Female | 3  | Released     | Oropharyngeal swab |
| hCoV-19/Mexico/QUE-InDRE_387/2021        | EPI_ISL_1168465 | 26/01/21 | North America / Mexico / Queretaro   | Human | Female | 35 | Released     | Oropharyngeal swab |
| hCoV-19/Mexico/NLE-InDRE_392/2021        | EPI_ISL_116847C | 19/01/21 | North America / Mexico / Nuevo Leon  | Human | Male   | 57 | Released     | Oropharyngeal swab |
| hCoV-19/Mexico/NLE-InDRE_395/2021        | EPI_ISL_1168473 | 19/01/21 | North America / Mexico / Nuevo Leon  | Human | Male   | 22 | Released     | Oropharyngeal swab |
| hCoV-19/Mexico/NLE-InDRE_400/2021        | EPI_ISL_116847E | 21/01/21 | North America / Mexico / Nuevo Leon  | Human | Male   | 27 | Released     | Oropharyngeal swab |
| hCoV-19/Mexico/NLE-InDRE_403/2021        | EPI_ISL_1168481 | 15/01/21 | North America / Mexico / Nuevo Leon  | Human | Female | 59 | Released     | Oropharyngeal swab |
| hCoV-19/Mexico/COA-InDRE_410/2021        | EPI_ISL_116848E | 18/01/21 | North America / Mexico / Coahuila    | Human | Male   | 29 | Released     | Oropharyngeal swab |
| hCoV-19/Mexico/COA-InDRE_412/2021        | EPI_ISL_116849C | 18/01/21 | North America / Mexico / Coahuila    | Human | Male   | 31 | Deceased     | Oropharyngeal swab |
| hCoV-19/Mexico/VER-InDRE_415/2021        | EPI_ISL_1168493 | 18/01/21 | North America / Mexico / Veracruz    | Human | Female | 80 | Live         | Oropharyngeal swab |
| hCoV-19/Mexico/VER-InDRE_417/2021        | EPI_ISL_1168495 | 20/01/21 | North America / Mexico / Veracruz    | Human | Male   | 45 | Live         | Oropharyngeal swab |
| hCoV-19/Mexico/VER-InDRE_418/2021        | EPI_ISL_116849E | 20/01/21 | North America / Mexico / Veracruz    | Human | Male   | 52 | Hospitalized | Oropharyngeal swab |
| hCoV-19/Mexico/JAL-InDRE_421/2021        | EPI_ISL_116849E | 18/01/21 | North America / Mexico / Jalisco     | Human | Female | 59 | Released     | Oropharyngeal swab |
| hCoV-19/Mexico/JAL-InDRE_426/2021        | EPI_ISL_1168504 | 19/01/21 | North America / Mexico / Jalisco     | Human | Male   | 16 | Released     | Oropharyngeal swab |
| hCoV-19/Mexico/JAL-InDRE_431/2021        | EPI_ISL_116850E | 20/01/21 | North America / Mexico / Jalisco     | Human | Male   | 77 | Hospitalized | Oropharyngeal swab |
| hCoV-19/Mexico/CHP-InDRE_443/2021        | EPI_ISL_1168521 | 18/01/21 | North America / Mexico / Chiapas     | Human | Female | 76 | Live         | Oropharyngeal swab |
| hCoV-19/Mexico/CHP-InDRE_444/2021        | EPI_ISL_1168522 | 19/01/21 | North America / Mexico / Chiapas     | Human | Male   | 47 | Deceased     | Oropharyngeal swab |
| hCoV-19/Mexico/CHP-InDRE_445/2021        | EPI_ISL_1168523 | 22/01/21 | North America / Mexico / Chiapas     | Human | Male   | 56 | Deceased     | Oropharyngeal swab |
| hCoV-19/Mexico/MOR-InDRE_448/2021        | EPI_ISL_116852E | 25/01/21 | North America / Mexico / Morelos     | Human | Female | 38 | Hospitalized | Oropharyngeal swab |
| hCoV-19/Mexico/HID-InDRE_461/2021        | EPI_ISL_1168531 | 16/01/21 | North America / Mexico / Hidalgo     | Human | Female | 31 | Live         | Oropharyngeal swab |

|                                          |                 |          |                                              |       |        |    |              |                    |
|------------------------------------------|-----------------|----------|----------------------------------------------|-------|--------|----|--------------|--------------------|
| hCoV-19/Mexico/MOR-InDRE_462/2021        | EPI_ISL_1168532 | 15/01/21 | North America / Mexico / Morelos             | Human | Male   | 18 | Released     | Oropharyngeal swab |
| hCoV-19/Mexico/MOR-InDRE_465/2021        | EPI_ISL_1168535 | 15/01/21 | North America / Mexico / Morelos             | Human | Female | 54 | Released     | Oropharyngeal swab |
| hCoV-19/Mexico/MEX-InDRE_467/2021        | EPI_ISL_1168537 | 16/01/21 | North America / Mexico / State of Mexico     | Human | Male   | 65 | Hospitalized | Oropharyngeal swab |
| hCoV-19/Mexico/BCS-InDRE_468/2021        | EPI_ISL_1168538 | 16/01/21 | North America / Mexico / Baja California Sur | Human | Female | 25 | Released     | Oropharyngeal swab |
| hCoV-19/Mexico/QUE-InDRE_473/2021        | EPI_ISL_1168543 | 16/01/21 | North America / Mexico / Queretaro           | Human | Male   | 34 | Released     | Oropharyngeal swab |
| hCoV-19/Mexico/QUE-InDRE_474/2021        | EPI_ISL_1168544 | 16/01/21 | North America / Mexico / Queretaro           | Human | Female | 30 | Released     | Oropharyngeal swab |
| hCoV-19/Mexico/QUE-InDRE_475/2021        | EPI_ISL_1168545 | 16/01/21 | North America / Mexico / Queretaro           | Human | Male   | 58 | Released     | Oropharyngeal swab |
| hCoV-19/Mexico/QUE-InDRE_479/2021        | EPI_ISL_1168549 | 16/01/21 | North America / Mexico / Queretaro           | Human | Male   | 18 | Released     | Oropharyngeal swab |
| hCoV-19/Mexico/QUE-InDRE_480/2021        | EPI_ISL_1168550 | 17/01/21 | North America / Mexico / Queretaro           | Human | Female | 51 | Deceased     | Oropharyngeal swab |
| hCoV-19/Mexico/COA-InDRE_497/2021        | EPI_ISL_1168567 | 18/01/21 | North America / Mexico / Coahuila            | Human | Female | 35 | Released     | Oropharyngeal swab |
| hCoV-19/Mexico/YUC-InDRE_500/2021        | EPI_ISL_1168570 | 18/01/21 | North America / Mexico / Yucatan             | Human | Female | 31 | Released     | Oropharyngeal swab |
| hCoV-19/Mexico/YUC-InDRE_501/2021        | EPI_ISL_1168571 | 18/01/21 | North America / Mexico / Yucatan             | Human | Female | 41 | Released     | Oropharyngeal swab |
| hCoV-19/Mexico/YUC-InDRE_503/2021        | EPI_ISL_1168573 | 18/01/21 | North America / Mexico / Yucatan             | Human | Male   | 46 | Released     | Oropharyngeal swab |
| hCoV-19/Mexico/COA-InDRE_511/2021        | EPI_ISL_1168581 | 15/01/21 | North America / Mexico / Coahuila            | Human | Male   | 47 | Released     | Oropharyngeal swab |
| hCoV-19/Mexico/HID-InDRE_520/2021        | EPI_ISL_1168590 | 21/01/21 | North America / Mexico / Hidalgo             | Human | Female | 75 | Live         | Oropharyngeal swab |
| hCoV-19/Mexico/HID-InDRE_521/2021        | EPI_ISL_1168591 | 23/01/21 | North America / Mexico / Hidalgo             | Human | Female | 32 | Live         | Oropharyngeal swab |
| hCoV-19/Mexico/MOR-InDRE_523/2021        | EPI_ISL_1168593 | 19/01/21 | North America / Mexico / Morelos             | Human | Female | 58 | Hospitalized | Oropharyngeal swab |
| hCoV-19/Mexico/MOR-InDRE_524/2021        | EPI_ISL_1168594 | 19/01/21 | North America / Mexico / Morelos             | Human | Male   | 39 | Released     | Oropharyngeal swab |
| hCoV-19/Mexico/MOR-InDRE_525/2021        | EPI_ISL_1168595 | 20/01/21 | North America / Mexico / Morelos             | Human | Male   | 46 | Released     | Oropharyngeal swab |
| hCoV-19/Mexico/MOR-InDRE_526/2021        | EPI_ISL_1168596 | 21/01/21 | North America / Mexico / Morelos             | Human | Male   | 44 | Released     | Oropharyngeal swab |
| hCoV-19/Mexico/MOR-InDRE_528/2021        | EPI_ISL_1168598 | 20/01/21 | North America / Mexico / Morelos             | Human | Female | 49 | Released     | Oropharyngeal swab |
| hCoV-19/Mexico/MOR-InDRE_529/2021        | EPI_ISL_1168599 | 21/01/21 | North America / Mexico / Morelos             | Human | Female | 40 | Released     | Oropharyngeal swab |
| hCoV-19/Mexico/MOR-InDRE_530/2021        | EPI_ISL_1168600 | 21/01/21 | North America / Mexico / Morelos             | Human | Male   | 87 | Released     | Oropharyngeal swab |
| hCoV-19/Mexico/MOR-InDRE_532/2021        | EPI_ISL_1168602 | 22/01/21 | North America / Mexico / Morelos             | Human | Male   | 33 | Released     | Oropharyngeal swab |
| hCoV-19/Mexico/MOR-InDRE_533/2021        | EPI_ISL_1168603 | 21/01/21 | North America / Mexico / Morelos             | Human | Female | 77 | Released     | Oropharyngeal swab |
| hCoV-19/Mexico/MOR-InDRE_534/2021        | EPI_ISL_1168604 | 25/01/21 | North America / Mexico / Morelos             | Human | Female | 45 | Released     | Oropharyngeal swab |
| hCoV-19/Mexico/OAX-InDRE_536/2021        | EPI_ISL_1168606 | 21/01/21 | North America / Mexico / Oaxaca              | Human | Male   | 32 | unknown      | Oropharyngeal swab |
| hCoV-19/Mexico/OAX-InDRE_537/2021        | EPI_ISL_1168607 | 20/01/21 | North America / Mexico / Oaxaca              | Human | Male   | 59 | Deceased     | Oropharyngeal swab |
| hCoV-19/Mexico/MEX-InDRE_542/2021        | EPI_ISL_1168612 | 22/01/21 | North America / Mexico / State of Mexico     | Human | Male   | 44 | Live         | Oropharyngeal swab |
| hCoV-19/Mexico/CAM-InDRE_544/2021        | EPI_ISL_1168614 | 17/01/21 | North America / Mexico / Campeche            | Human | Male   | 59 | Deceased     | Oropharyngeal swab |
| hCoV-19/Mexico/COL-InDRE_545/2021        | EPI_ISL_1168615 | 15/01/21 | North America / Mexico / Colima              | Human | Female | 72 | Deceased     | Oropharyngeal swab |
| hCoV-19/Mexico/JAL-InDRE_552/2021        | EPI_ISL_1168622 | 15/01/21 | North America / Mexico / Jalisco             | Human | Female | 70 | Released     | Oropharyngeal swab |
| hCoV-19/Mexico/QUE-InDRE_554/2021        | EPI_ISL_1168624 | 20/01/21 | North America / Mexico / Queretaro           | Human | Male   | 36 | Released     | Oropharyngeal swab |
| hCoV-19/Mexico/QUE-InDRE_556/2021        | EPI_ISL_1168626 | 22/01/21 | North America / Mexico / Queretaro           | Human | Female | 33 | Released     | Oropharyngeal swab |
| hCoV-19/Mexico/QUE-InDRE_557/2021        | EPI_ISL_1168627 | 22/01/21 | North America / Mexico / Queretaro           | Human | Female | 26 | Released     | Oropharyngeal swab |
| hCoV-19/Mexico/QUE-InDRE_558/2021        | EPI_ISL_1168628 | 22/01/21 | North America / Mexico / Queretaro           | Human | Male   | 37 | Released     | Oropharyngeal swab |
| hCoV-19/Mexico/QUE-InDRE_561/2021        | EPI_ISL_1168631 | 22/01/21 | North America / Mexico / Queretaro           | Human | Male   | 22 | Released     | Oropharyngeal swab |
| hCoV-19/Mexico/QUE-InDRE_562/2021        | EPI_ISL_1168632 | 22/01/21 | North America / Mexico / Queretaro           | Human | Male   | 26 | Released     | Oropharyngeal swab |
| hCoV-19/Mexico/QUE-InDRE_563/2021        | EPI_ISL_1168633 | 22/01/21 | North America / Mexico / Queretaro           | Human | Male   | 39 | Live         | Oropharyngeal swab |
| hCoV-19/Mexico/CMX-INMEGEN-03-01-01/2021 | EPI_ISL_1168634 | 15/02/21 | North America / Mexico / Mexico City         | Human | Female | 49 | unknown      | Oropharyngeal swab |
| hCoV-19/Mexico/CMX-INMEGEN-03-01-02/2021 | EPI_ISL_1168635 | 15/02/21 | North America / Mexico / Mexico City         | Human | Male   | 64 | unknown      | Oropharyngeal swab |
| hCoV-19/Mexico/CMX-INMEGEN-03-01-03/2021 | EPI_ISL_1168636 | 15/02/21 | North America / Mexico / Mexico City         | Human | Female | 59 | unknown      | Oropharyngeal swab |
| hCoV-19/Mexico/CMX-INMEGEN-03-01-04/2021 | EPI_ISL_1168637 | 12/02/21 | North America / Mexico / Mexico City         | Human | Male   | 57 | unknown      | Oropharyngeal swab |
| hCoV-19/Mexico/CMX-INMEGEN-03-01-05/2021 | EPI_ISL_1168638 | 15/02/21 | North America / Mexico / Mexico City         | Human | Male   | 66 | unknown      | Oropharyngeal swab |









|                                          |                 |          |                                          |       |        |    |              |                                       |
|------------------------------------------|-----------------|----------|------------------------------------------|-------|--------|----|--------------|---------------------------------------|
| hCoV-19/Mexico/CMX-INMEGEN-03-05-21/2021 | EPI_ISL_1262717 | 11/02/21 | North America / Mexico / Mexico City     | Human | Male   | 7  | unknown      | Oropharyngeal swab                    |
| hCoV-19/Mexico/CMX-INMEGEN-03-06-12/2021 | EPI_ISL_1265902 | 27/02/21 | North America / Mexico / Mexico City     | Human | Male   | 55 | unknown      | Oropharyngeal swab                    |
| hCoV-19/Mexico/CMX-INMEGEN-03-06-13/2021 | EPI_ISL_1265903 | 26/02/21 | North America / Mexico / Mexico City     | Human | Female | 47 | unknown      | Oropharyngeal swab                    |
| hCoV-19/Mexico/CMX-INMEGEN-03-06-14/2021 | EPI_ISL_1265904 | 25/02/21 | North America / Mexico / Mexico City     | Human | Male   | 12 | unknown      | Oropharyngeal swab                    |
| hCoV-19/Mexico/CMX-INMEGEN-03-06-16/2021 | EPI_ISL_1265906 | 26/02/21 | North America / Mexico / Mexico City     | Human | Male   | 41 | unknown      | Oropharyngeal swab                    |
| hCoV-19/Mexico/CMX-INMEGEN-03-06-17/2021 | EPI_ISL_1265907 | 25/02/21 | North America / Mexico / Mexico City     | Human | Female | 58 | unknown      | Oropharyngeal swab                    |
| hCoV-19/Mexico/CMX-INMEGEN-03-06-18/2021 | EPI_ISL_1265908 | 25/02/21 | North America / Mexico / Mexico City     | Human | Female | 35 | unknown      | Oropharyngeal swab                    |
| hCoV-19/Mexico/QUE-INNER-IMSS-00112/2021 | EPI_ISL_1279263 | 19/02/21 | North America / Mexico / Queretaro       | Human | Male   | 55 | Ambulatory   | Nasopharyngeal and oropharyngeal swab |
| hCoV-19/Mexico/PUE-INNER-IMSS-00120/2021 | EPI_ISL_1279268 | 20/02/21 | North America / Mexico / Puebla          | Human | Male   | 64 | Hospitalized | Nasopharyngeal and oropharyngeal swab |
| hCoV-19/Mexico/SLP-INNER-IMSS-00170/2021 | EPI_ISL_1279269 | 20/02/21 | North America / Mexico / San Luis Potosi | Human | Male   | 48 | Hospitalized | Nasopharyngeal and oropharyngeal swab |
| hCoV-19/Mexico/PUE-INNER-IMSS-00155/2021 | EPI_ISL_1279274 | 19/02/21 | North America / Mexico / Puebla          | Human | Male   | 33 | Ambulatory   | Nasopharyngeal and oropharyngeal swab |
| hCoV-19/Mexico/CAM-INNER-IMSS-00368/2021 | EPI_ISL_1279282 | 11/02/21 | North America / Mexico / Campeche        | Human | Male   | 30 | Ambulatory   | Nasopharyngeal and oropharyngeal swab |
| hCoV-19/Mexico/SLP-INNER-IMSS-00162/2021 | EPI_ISL_1279286 | 18/02/21 | North America / Mexico / San Luis Potosi | Human | Male   | 53 | Hospitalized | Nasopharyngeal and oropharyngeal swab |
| hCoV-19/Mexico/CMX-INNER-IMSS-00179/2021 | EPI_ISL_1279290 | 22/02/21 | North America / Mexico / Mexico City     | Human | Female | 54 | Hospitalized | Pharyngeal swab                       |
| hCoV-19/Mexico/CMX-INNER-IMSS-00180/2021 | EPI_ISL_1279291 | 22/02/21 | North America / Mexico / Mexico City     | Human | Male   | 81 | Hospitalized | Pharyngeal swab                       |
| hCoV-19/Mexico/CMX-INNER-IMSS-00181/2021 | EPI_ISL_1279292 | 22/02/21 | North America / Mexico / Mexico City     | Human | Male   | 77 | Hospitalized | Pharyngeal swab                       |
| hCoV-19/Mexico/VER-INNER-IMSS-00354/2021 | EPI_ISL_1279293 | 20/02/21 | North America / Mexico / Veracruz        | Human | Male   | 24 | Ambulatory   | Pharyngeal swab                       |
| hCoV-19/Mexico/ZAC-INNER-IMSS-00055/2021 | EPI_ISL_1279295 | 15/02/21 | North America / Mexico / Zacatecas       | Human | Male   | 52 | Ambulatory   | Nasopharyngeal and oropharyngeal swab |
| hCoV-19/Mexico/SLP-INNER-IMSS-00337/2021 | EPI_ISL_1279299 | 23/02/21 | North America / Mexico / San Luis Potosi | Human | Female | 73 | Hospitalized | Nasopharyngeal and oropharyngeal swab |
| hCoV-19/Mexico/NLE-INNER-IMSS-00049/2021 | EPI_ISL_1279302 | 16/02/21 | North America / Mexico / Nuevo Leon      | Human | Male   | 34 | Ambulatory   | Nasopharyngeal and oropharyngeal swab |
| hCoV-19/Mexico/ZAC-INNER-IMSS-00009/2021 | EPI_ISL_1279312 | 08/02/21 | North America / Mexico / Zacatecas       | Human | Male   | 54 | Hospitalized | Nasopharyngeal and oropharyngeal swab |
| hCoV-19/Mexico/ZAC-INNER-IMSS-00011/2021 | EPI_ISL_1279313 | 09/02/21 | North America / Mexico / Zacatecas       | Human | Female | 49 | Ambulatory   | Nasopharyngeal and oropharyngeal swab |
| hCoV-19/Mexico/ZAC-INNER-IMSS-00015/2021 | EPI_ISL_1279317 | 09/02/21 | North America / Mexico / Zacatecas       | Human | Female | 66 | Ambulatory   | Nasopharyngeal and oropharyngeal swab |
| hCoV-19/Mexico/ZAC-INNER-IMSS-00018/2021 | EPI_ISL_1279320 | 10/02/21 | North America / Mexico / Zacatecas       | Human | Male   | 40 | Ambulatory   | Nasopharyngeal and oropharyngeal swab |
| hCoV-19/Mexico/ZAC-INNER-IMSS-00024/2021 | EPI_ISL_1279325 | 11/02/21 | North America / Mexico / Zacatecas       | Human | Male   | 44 | Ambulatory   | Nasopharyngeal and oropharyngeal swab |
| hCoV-19/Mexico/ZAC-INNER-IMSS-00027/2021 | EPI_ISL_1279326 | 11/02/21 | North America / Mexico / Zacatecas       | Human | Male   | 21 | Ambulatory   | Nasopharyngeal and oropharyngeal swab |
| hCoV-19/Mexico/ZAC-INNER-IMSS-00028/2021 | EPI_ISL_1279327 | 11/02/21 | North America / Mexico / Zacatecas       | Human | Male   | 35 | Ambulatory   | Nasopharyngeal and oropharyngeal swab |
| hCoV-19/Mexico/ZAC-INNER-IMSS-00030/2021 | EPI_ISL_1279329 | 12/02/21 | North America / Mexico / Zacatecas       | Human | Male   | 24 | Ambulatory   | Nasopharyngeal and oropharyngeal swab |
| hCoV-19/Mexico/ZAC-INNER-IMSS-00033/2021 | EPI_ISL_1279332 | 11/02/21 | North America / Mexico / Zacatecas       | Human | Female | 25 | Ambulatory   | Nasopharyngeal and oropharyngeal swab |
| hCoV-19/Mexico/ZAC-INNER-IMSS-00034/2021 | EPI_ISL_1279333 | 12/02/21 | North America / Mexico / Zacatecas       | Human | Male   | 50 | Ambulatory   | Nasopharyngeal and oropharyngeal swab |
| hCoV-19/Mexico/ZAC-INNER-IMSS-00041/2021 | EPI_ISL_1279340 | 13/02/21 | North America / Mexico / Zacatecas       | Human | Female | 44 | Ambulatory   | Nasopharyngeal and oropharyngeal swab |
| hCoV-19/Mexico/ZAC-INNER-IMSS-00042/2021 | EPI_ISL_1279341 | 13/02/21 | North America / Mexico / Zacatecas       | Human | Female | 35 | Ambulatory   | Nasopharyngeal and oropharyngeal swab |
| hCoV-19/Mexico/ZAC-INNER-IMSS-00043/2021 | EPI_ISL_1279342 | 13/02/21 | North America / Mexico / Zacatecas       | Human | Male   | 41 | Ambulatory   | Nasopharyngeal and oropharyngeal swab |
| hCoV-19/Mexico/ZAC-INNER-IMSS-00044/2021 | EPI_ISL_1279343 | 14/02/21 | North America / Mexico / Zacatecas       | Human | Male   | 77 | Ambulatory   | Nasopharyngeal and oropharyngeal swab |
| hCoV-19/Mexico/ZAC-INNER-IMSS-00047/2021 | EPI_ISL_1279346 | 14/02/21 | North America / Mexico / Zacatecas       | Human | Male   | 59 | Hospitalized | Nasopharyngeal and oropharyngeal swab |
| hCoV-19/Mexico/ZAC-INNER-IMSS-00048/2021 | EPI_ISL_1279347 | 14/02/21 | North America / Mexico / Zacatecas       | Human | Female | 71 | Hospitalized | Nasopharyngeal and oropharyngeal swab |
| hCoV-19/Mexico/ZAC-INNER-IMSS-00051/2021 | EPI_ISL_1279349 | 13/02/21 | North America / Mexico / Zacatecas       | Human | Female | 44 | Ambulatory   | Nasopharyngeal and oropharyngeal swab |
| hCoV-19/Mexico/ZAC-INNER-IMSS-00060/2021 | EPI_ISL_1279353 | 15/02/21 | North America / Mexico / Zacatecas       | Human | Female | 55 | Ambulatory   | Nasopharyngeal and oropharyngeal swab |
| hCoV-19/Mexico/ZAC-INNER-IMSS-00061/2021 | EPI_ISL_1279354 | 15/02/21 | North America / Mexico / Zacatecas       | Human | Male   | 43 | Ambulatory   | Nasopharyngeal and oropharyngeal swab |
| hCoV-19/Mexico/ZAC-INNER-IMSS-00063/2021 | EPI_ISL_1279356 | 15/02/21 | North America / Mexico / Zacatecas       | Human | Male   | 27 | Ambulatory   | Nasopharyngeal and oropharyngeal swab |
| hCoV-19/Mexico/ZAC-INNER-IMSS-00067/2021 | EPI_ISL_1279360 | 15/02/21 | North America / Mexico / Zacatecas       | Human | Female | 60 | Hospitalized | Nasopharyngeal and oropharyngeal swab |
| hCoV-19/Mexico/ZAC-INNER-IMSS-00069/2021 | EPI_ISL_1279361 | 16/02/21 | North America / Mexico / Zacatecas       | Human | Male   | 43 | Ambulatory   | Nasopharyngeal and oropharyngeal swab |
| hCoV-19/Mexico/ZAC-INNER-IMSS-00070/2021 | EPI_ISL_1279362 | 16/02/21 | North America / Mexico / Zacatecas       | Human | Female | 46 | Ambulatory   | Nasopharyngeal and oropharyngeal swab |
| hCoV-19/Mexico/ZAC-INNER-IMSS-00071/2021 | EPI_ISL_1279363 | 16/02/21 | North America / Mexico / Zacatecas       | Human | Female | 43 | Ambulatory   | Nasopharyngeal and oropharyngeal swab |



|                                          |                 |          |                                          |       |        |     |              |                                       |
|------------------------------------------|-----------------|----------|------------------------------------------|-------|--------|-----|--------------|---------------------------------------|
| hCoV-19/Mexico/PUE-INNER-IMSS-00146/2021 | EPI_ISL_1279425 | 18/02/21 | North America / Mexico / Puebla          | Human | Male   | 33  | Ambulatory   | Nasopharyngeal swab                   |
| hCoV-19/Mexico/PUE-INNER-IMSS-00149/2021 | EPI_ISL_1279427 | 17/02/21 | North America / Mexico / Puebla          | Human | Female | 34  | Ambulatory   | Nasopharyngeal and oropharyngeal swab |
| hCoV-19/Mexico/PUE-INNER-IMSS-00150/2021 | EPI_ISL_1279428 | 20/02/21 | North America / Mexico / Puebla          | Human | Male   | 44  | Ambulatory   | Nasopharyngeal swab                   |
| hCoV-19/Mexico/PUE-INNER-IMSS-00151/2021 | EPI_ISL_1279429 | 20/02/21 | North America / Mexico / Puebla          | Human | Female | 39  | Ambulatory   | Nasopharyngeal swab                   |
| hCoV-19/Mexico/PUE-INNER-IMSS-00152/2021 | EPI_ISL_1279430 | 18/02/21 | North America / Mexico / Puebla          | Human | Male   | 32  | Ambulatory   | Nasopharyngeal and oropharyngeal swab |
| hCoV-19/Mexico/PUE-INNER-IMSS-00153/2021 | EPI_ISL_1279431 | 19/02/21 | North America / Mexico / Puebla          | Human | Male   | 43  | Ambulatory   | Nasopharyngeal and oropharyngeal swab |
| hCoV-19/Mexico/PUE-INNER-IMSS-00154/2021 | EPI_ISL_1279432 | 19/02/21 | North America / Mexico / Puebla          | Human | Male   | 47  | Ambulatory   | Nasopharyngeal and oropharyngeal swab |
| hCoV-19/Mexico/PUE-INNER-IMSS-00156/2021 | EPI_ISL_1279433 | 20/02/21 | North America / Mexico / Puebla          | Human | Male   | 50  | Ambulatory   | Nasopharyngeal swab                   |
| hCoV-19/Mexico/PUE-INNER-IMSS-00157/2021 | EPI_ISL_1279434 | 20/02/21 | North America / Mexico / Puebla          | Human | Male   | 80  | Ambulatory   | Nasopharyngeal swab                   |
| hCoV-19/Mexico/PUE-INNER-IMSS-00158/2021 | EPI_ISL_1279435 | 20/02/21 | North America / Mexico / Puebla          | Human | Female | 27  | Ambulatory   | Nasopharyngeal swab                   |
| hCoV-19/Mexico/PUE-INNER-IMSS-00159/2021 | EPI_ISL_1279436 | 20/02/21 | North America / Mexico / Puebla          | Human | Male   | 35  | Ambulatory   | Nasopharyngeal swab                   |
| hCoV-19/Mexico/PUE-INNER-IMSS-00160/2021 | EPI_ISL_1279437 | 20/02/21 | North America / Mexico / Puebla          | Human | Male   | 38  | Ambulatory   | Nasopharyngeal swab                   |
| hCoV-19/Mexico/PUE-INNER-IMSS-00161/2021 | EPI_ISL_1279438 | 20/02/21 | North America / Mexico / Puebla          | Human | Male   | 41  | Ambulatory   | Nasopharyngeal swab                   |
| hCoV-19/Mexico/ROO-INNER-IMSS-00164/2021 | EPI_ISL_1279440 | 10/02/21 | North America / Mexico / Quintana Roo    | Human | Female | 62  | Ambulatory   | Nasopharyngeal and oropharyngeal swab |
| hCoV-19/Mexico/OAX-INNER-IMSS-00165/2021 | EPI_ISL_1279441 | 21/02/21 | North America / Mexico / Oaxaca          | Human | Male   | 48  | Hospitalized | Nasopharyngeal and oropharyngeal swab |
| hCoV-19/Mexico/OAX-INNER-IMSS-00166/2021 | EPI_ISL_1279442 | 21/02/21 | North America / Mexico / Oaxaca          | Human | Female | 23  | Ambulatory   | Nasopharyngeal and oropharyngeal swab |
| hCoV-19/Mexico/OAX-INNER-IMSS-00167/2021 | EPI_ISL_1279443 | 21/02/21 | North America / Mexico / Oaxaca          | Human | Male   | 28  | Hospitalized | Nasopharyngeal and oropharyngeal swab |
| hCoV-19/Mexico/SLP-INNER-IMSS-00168/2021 | EPI_ISL_1279444 | 21/02/21 | North America / Mexico / San Luis Potosi | Human | Female | 50  | Hospitalized | Nasopharyngeal and oropharyngeal swab |
| hCoV-19/Mexico/SLP-INNER-IMSS-00171/2021 | EPI_ISL_1279445 | 20/02/21 | North America / Mexico / San Luis Potosi | Human | Male   | 78  | Hospitalized | Nasopharyngeal and oropharyngeal swab |
| hCoV-19/Mexico/SLP-INNER-IMSS-00173/2021 | EPI_ISL_1279447 | 20/02/21 | North America / Mexico / San Luis Potosi | Human | Female | 53  | Hospitalized | Nasopharyngeal and oropharyngeal swab |
| hCoV-19/Mexico/VER-INNER-IMSS-00174/2021 | EPI_ISL_1279448 | 15/02/21 | North America / Mexico / Veracruz        | Human | Female | 81  | Hospitalized | Nasopharyngeal and oropharyngeal swab |
| hCoV-19/Mexico/VER-INNER-IMSS-00175/2021 | EPI_ISL_1279449 | 17/02/21 | North America / Mexico / Veracruz        | Human | Male   | 50  | Ambulatory   | Nasopharyngeal and oropharyngeal swab |
| hCoV-19/Mexico/VER-INNER-IMSS-00176/2021 | EPI_ISL_1279450 | 19/02/21 | North America / Mexico / Veracruz        | Human | Male   | 68  | Hospitalized | Nasopharyngeal and oropharyngeal swab |
| hCoV-19/Mexico/CMX-INNER-IMSS-00178/2021 | EPI_ISL_1279452 | 22/02/21 | North America / Mexico / Mexico City     | Human | Female | 33  | Hospitalized | Pharyngeal swab                       |
| hCoV-19/Mexico/OAX-INNER-IMSS-00182/2021 | EPI_ISL_1279453 | 20/02/21 | North America / Mexico / Oaxaca          | Human | Male   | 57  | Hospitalized | Nasopharyngeal and oropharyngeal swab |
| hCoV-19/Mexico/OAX-INNER-IMSS-00183/2021 | EPI_ISL_1279454 | 20/02/21 | North America / Mexico / Oaxaca          | Human | Female | 51  | Ambulatory   | Nasopharyngeal and oropharyngeal swab |
| hCoV-19/Mexico/CMX-INNER-IMSS-00186/2021 | EPI_ISL_1279457 | 23/02/21 | North America / Mexico / Mexico City     | Human | Female | 72  | Hospitalized | Pharyngeal swab                       |
| hCoV-19/Mexico/MEX-INNER-IMSS-00187/2021 | EPI_ISL_1279458 | 23/02/21 | North America / Mexico / State of Mexico | Human | Female | 58  | Ambulatory   | Pharyngeal swab                       |
| hCoV-19/Mexico/CMX-INNER-IMSS-00188/2021 | EPI_ISL_1279459 | 23/02/21 | North America / Mexico / Mexico City     | Human | Male   | 39  | Ambulatory   | Pharyngeal swab                       |
| hCoV-19/Mexico/CMX-INNER-IMSS-00189/2021 | EPI_ISL_1279460 | 23/02/21 | North America / Mexico / Mexico City     | Human | Female | 100 | Hospitalized | Pharyngeal swab                       |
| hCoV-19/Mexico/AGU-INNER-IMSS-00190/2021 | EPI_ISL_1279461 | 19/02/21 | North America / Mexico / Aguascalientes  | Human | Female | 36  | Ambulatory   | Nasopharyngeal and oropharyngeal swab |
| hCoV-19/Mexico/DUR-INNER-IMSS-00194/2021 | EPI_ISL_1279465 | 08/02/21 | North America / Mexico / Durango         | Human | Female | 35  | Ambulatory   | Nasopharyngeal and oropharyngeal swab |
| hCoV-19/Mexico/CHH-INNER-IMSS-00195/2021 | EPI_ISL_1279466 | 08/02/21 | North America / Mexico / Chihuahua       | Human | Female | 30  | Hospitalized | Nasopharyngeal and oropharyngeal swab |
| hCoV-19/Mexico/TAM-INNER-IMSS-00209/2021 | EPI_ISL_1279476 | 10/02/21 | North America / Mexico / Tamaulipas      | Human | Female | 37  | Ambulatory   | Nasopharyngeal and oropharyngeal swab |
| hCoV-19/Mexico/COA-INNER-IMSS-00211/2021 | EPI_ISL_1279477 | 11/02/21 | North America / Mexico / Coahuila        | Human | Female | 75  | Ambulatory   | Nasopharyngeal and oropharyngeal swab |
| hCoV-19/Mexico/SLP-INNER-IMSS-00218/2021 | EPI_ISL_1279484 | 10/02/21 | North America / Mexico / San Luis Potosi | Human | Female | 71  | Ambulatory   | Nasopharyngeal and oropharyngeal swab |
| hCoV-19/Mexico/NLE-INNER-IMSS-00225/2021 | EPI_ISL_1279490 | 15/02/21 | North America / Mexico / Nuevo Leon      | Human | Male   | 27  | Ambulatory   | Nasopharyngeal and oropharyngeal swab |
| hCoV-19/Mexico/TAM-INNER-IMSS-00227/2021 | EPI_ISL_1279492 | 12/02/21 | North America / Mexico / Tamaulipas      | Human | Female | 53  | Ambulatory   | Pharyngeal swab                       |
| hCoV-19/Mexico/NLE-INNER-IMSS-00232/2021 | EPI_ISL_1279496 | 16/02/21 | North America / Mexico / Nuevo Leon      | Human | Female | 47  | Ambulatory   | Nasopharyngeal and oropharyngeal swab |
| hCoV-19/Mexico/NLE-INNER-IMSS-00234/2021 | EPI_ISL_1279498 | 16/02/21 | North America / Mexico / Nuevo Leon      | Human | Male   | 70  | Hospitalized | Nasopharyngeal and oropharyngeal swab |
| hCoV-19/Mexico/NLE-INNER-IMSS-00236/2021 | EPI_ISL_1279500 | 16/02/21 | North America / Mexico / Nuevo Leon      | Human | Female | 62  | Hospitalized | Nasopharyngeal and oropharyngeal swab |
| hCoV-19/Mexico/COA-INNER-IMSS-00240/2021 | EPI_ISL_1279504 | 13/02/21 | North America / Mexico / Coahuila        | Human | Female | 31  | Hospitalized | Nasopharyngeal and oropharyngeal swab |
| hCoV-19/Mexico/COA-INNER-IMSS-00243/2021 | EPI_ISL_1279506 | 15/02/21 | North America / Mexico / Coahuila        | Human | Female | 34  | Hospitalized | Nasopharyngeal and oropharyngeal swab |
| hCoV-19/Mexico/COA-INNER-IMSS-00246/2021 | EPI_ISL_1279509 | 13/02/21 | North America / Mexico / Coahuila        | Human | Female | 44  | Hospitalized | Nasopharyngeal and oropharyngeal swab |

|                                          |                 |          |                                          |       |        |    |              |                                       |
|------------------------------------------|-----------------|----------|------------------------------------------|-------|--------|----|--------------|---------------------------------------|
| hCoV-19/Mexico/NLE-INNER-IMSS-00252/2021 | EPI_ISL_1279514 | 17/02/21 | North America / Mexico / Nuevo Leon      | Human | Female | 77 | Ambulatory   | Nasopharyngeal and oropharyngeal swab |
| hCoV-19/Mexico/TAM-INNER-IMSS-00254/2021 | EPI_ISL_1279516 | 16/02/21 | North America / Mexico / Tamaulipas      | Human | Male   | 41 | Ambulatory   | Nasopharyngeal and oropharyngeal swab |
| hCoV-19/Mexico/TAM-INNER-IMSS-00259/2021 | EPI_ISL_1279521 | 18/02/21 | North America / Mexico / Tamaulipas      | Human | Male   | 27 | Hospitalized | Nasopharyngeal and oropharyngeal swab |
| hCoV-19/Mexico/CHH-INNER-IMSS-00272/2021 | EPI_ISL_1279531 | 13/02/21 | North America / Mexico / Chihuahua       | Human | Female | 68 | Hospitalized | Nasopharyngeal and oropharyngeal swab |
| hCoV-19/Mexico/DUR-INNER-IMSS-00274/2021 | EPI_ISL_1279532 | 17/02/21 | North America / Mexico / Durango         | Human | Female | 62 | Hospitalized | Nasopharyngeal and oropharyngeal swab |
| hCoV-19/Mexico/DUR-INNER-IMSS-00275/2021 | EPI_ISL_1279533 | 16/02/21 | North America / Mexico / Durango         | Human | Female | 33 | Ambulatory   | Nasopharyngeal and oropharyngeal swab |
| hCoV-19/Mexico/TAM-INNER-IMSS-00276/2021 | EPI_ISL_1279534 | 17/02/21 | North America / Mexico / Tamaulipas      | Human | Female | 49 | Hospitalized | Nasopharyngeal and oropharyngeal swab |
| hCoV-19/Mexico/TAM-INNER-IMSS-00277/2021 | EPI_ISL_1279535 | 12/02/21 | North America / Mexico / Tamaulipas      | Human | Female | 28 | Ambulatory   | Nasopharyngeal and oropharyngeal swab |
| hCoV-19/Mexico/GRO-INNER-IMSS-00280/2021 | EPI_ISL_1279537 | 20/02/21 | North America / Mexico / Guerrero        | Human | Female | 81 | Hospitalized | Nasopharyngeal and oropharyngeal swab |
| hCoV-19/Mexico/PUE-INNER-IMSS-00282/2021 | EPI_ISL_1279538 | 19/02/21 | North America / Mexico / Puebla          | Human | Female | 21 | Ambulatory   | Nasopharyngeal and oropharyngeal swab |
| hCoV-19/Mexico/TLA-INNER-IMSS-00284/2021 | EPI_ISL_1279539 | 22/02/21 | North America / Mexico / Tlaxcala        | Human | Male   | 62 | Hospitalized | Nasopharyngeal and oropharyngeal swab |
| hCoV-19/Mexico/TLA-INNER-IMSS-00285/2021 | EPI_ISL_1279540 | 23/02/21 | North America / Mexico / Tlaxcala        | Human | Male   | 79 | Hospitalized | Nasopharyngeal and oropharyngeal swab |
| hCoV-19/Mexico/VER-INNER-IMSS-00286/2021 | EPI_ISL_1279541 | 17/02/21 | North America / Mexico / Veracruz        | Human | Male   | 35 | Ambulatory   | Nasopharyngeal and oropharyngeal swab |
| hCoV-19/Mexico/VER-INNER-IMSS-00287/2021 | EPI_ISL_1279542 | 19/02/21 | North America / Mexico / Veracruz        | Human | Male   | 28 | Ambulatory   | Nasopharyngeal and oropharyngeal swab |
| hCoV-19/Mexico/VER-INNER-IMSS-00290/2021 | EPI_ISL_1279544 | 19/02/21 | North America / Mexico / Veracruz        | Human | Male   | 22 | Ambulatory   | Nasopharyngeal and oropharyngeal swab |
| hCoV-19/Mexico/VER-INNER-IMSS-00291/2021 | EPI_ISL_1279545 | 19/02/21 | North America / Mexico / Veracruz        | Human | Male   | 38 | Ambulatory   | Nasopharyngeal and oropharyngeal swab |
| hCoV-19/Mexico/VER-INNER-IMSS-00293/2021 | EPI_ISL_1279546 | 20/02/21 | North America / Mexico / Veracruz        | Human | Male   | 61 | Hospitalized | Nasopharyngeal and oropharyngeal swab |
| hCoV-19/Mexico/VER-INNER-IMSS-00294/2021 | EPI_ISL_1279547 | 20/02/21 | North America / Mexico / Veracruz        | Human | Female | 92 | Hospitalized | Nasopharyngeal and oropharyngeal swab |
| hCoV-19/Mexico/VER-INNER-IMSS-00295/2021 | EPI_ISL_1279548 | 21/02/21 | North America / Mexico / Veracruz        | Human | Male   | 83 | Hospitalized | Nasopharyngeal and oropharyngeal swab |
| hCoV-19/Mexico/VER-INNER-IMSS-00298/2021 | EPI_ISL_1279551 | 21/02/21 | North America / Mexico / Veracruz        | Human | Male   | 40 | Hospitalized | Nasopharyngeal and oropharyngeal swab |
| hCoV-19/Mexico/VER-INNER-IMSS-00299/2021 | EPI_ISL_1279552 | 19/02/21 | North America / Mexico / Veracruz        | Human | Female | 33 | Ambulatory   | Nasopharyngeal and oropharyngeal swab |
| hCoV-19/Mexico/VER-INNER-IMSS-00300/2021 | EPI_ISL_1279553 | 19/02/21 | North America / Mexico / Veracruz        | Human | Female | 49 | Ambulatory   | Nasopharyngeal and oropharyngeal swab |
| hCoV-19/Mexico/VER-INNER-IMSS-00301/2021 | EPI_ISL_1279554 | 19/02/21 | North America / Mexico / Veracruz        | Human | Male   | 69 | Hospitalized | Nasopharyngeal and oropharyngeal swab |
| hCoV-19/Mexico/VER-INNER-IMSS-00302/2021 | EPI_ISL_1279555 | 19/02/21 | North America / Mexico / Veracruz        | Human | Male   | 31 | Hospitalized | Nasopharyngeal and oropharyngeal swab |
| hCoV-19/Mexico/VER-INNER-IMSS-00303/2021 | EPI_ISL_1279556 | 19/02/21 | North America / Mexico / Veracruz        | Human | Female | 45 | Ambulatory   | Nasopharyngeal and oropharyngeal swab |
| hCoV-19/Mexico/GRO-INNER-IMSS-00304/2021 | EPI_ISL_1279557 | 20/02/21 | North America / Mexico / Guerrero        | Human | Male   | 47 | Ambulatory   | Nasopharyngeal and oropharyngeal swab |
| hCoV-19/Mexico/MOR-INNER-IMSS-00305/2021 | EPI_ISL_1279558 | 21/02/21 | North America / Mexico / Morelos         | Human | Male   | 83 | Hospitalized | Nasopharyngeal and oropharyngeal swab |
| hCoV-19/Mexico/MEX-INNER-IMSS-00306/2021 | EPI_ISL_1279559 | 22/02/21 | North America / Mexico / State of Mexico | Human | Female | 34 | Hospitalized | Nasopharyngeal and oropharyngeal swab |
| hCoV-19/Mexico/MOR-INNER-IMSS-00307/2021 | EPI_ISL_1279560 | 18/02/21 | North America / Mexico / Morelos         | Human | Male   | 44 | Hospitalized | Nasopharyngeal and oropharyngeal swab |
| hCoV-19/Mexico/MEX-INNER-IMSS-00308/2021 | EPI_ISL_1279561 | 22/02/21 | North America / Mexico / State of Mexico | Human | Female | 82 | Ambulatory   | Nasopharyngeal and oropharyngeal swab |
| hCoV-19/Mexico/MEX-INNER-IMSS-00309/2021 | EPI_ISL_1279562 | 22/02/21 | North America / Mexico / State of Mexico | Human | Female | 63 | Hospitalized | Nasopharyngeal and oropharyngeal swab |
| hCoV-19/Mexico/MEX-INNER-IMSS-00310/2021 | EPI_ISL_1279563 | 22/02/21 | North America / Mexico / State of Mexico | Human | Female | 70 | Hospitalized | Nasopharyngeal and oropharyngeal swab |
| hCoV-19/Mexico/VER-INNER-IMSS-00311/2021 | EPI_ISL_1279564 | 19/02/21 | North America / Mexico / Veracruz        | Human | Female | 37 | Ambulatory   | Nasopharyngeal and oropharyngeal swab |
| hCoV-19/Mexico/VER-INNER-IMSS-00314/2021 | EPI_ISL_1279566 | 22/02/21 | North America / Mexico / Veracruz        | Human | Female | 82 | Hospitalized | Nasopharyngeal and oropharyngeal swab |
| hCoV-19/Mexico/VER-INNER-IMSS-00315/2021 | EPI_ISL_1279567 | 22/02/21 | North America / Mexico / Veracruz        | Human | Female | 74 | Hospitalized | Nasopharyngeal and oropharyngeal swab |
| hCoV-19/Mexico/VER-INNER-IMSS-00316/2021 | EPI_ISL_1279568 | 22/02/21 | North America / Mexico / Veracruz        | Human | Male   | 55 | Hospitalized | Nasopharyngeal and oropharyngeal swab |
| hCoV-19/Mexico/VER-INNER-IMSS-00317/2021 | EPI_ISL_1279569 | 22/02/21 | North America / Mexico / Veracruz        | Human | Female | 65 | Hospitalized | Nasopharyngeal and oropharyngeal swab |
| hCoV-19/Mexico/MEX-INNER-IMSS-00320/2021 | EPI_ISL_1279570 | 23/02/21 | North America / Mexico / State of Mexico | Human | Female | 48 | Hospitalized | Pharyngeal swab                       |
| hCoV-19/Mexico/MEX-INNER-IMSS-00321/2021 | EPI_ISL_1279571 | 22/02/21 | North America / Mexico / State of Mexico | Human | Female | 59 | Ambulatory   | Nasopharyngeal and oropharyngeal swab |
| hCoV-19/Mexico/MEX-INNER-IMSS-00322/2021 | EPI_ISL_1279572 | 23/02/21 | North America / Mexico / State of Mexico | Human | Female | 32 | Hospitalized | Pharyngeal swab                       |
| hCoV-19/Mexico/MEX-INNER-IMSS-00323/2021 | EPI_ISL_1279573 | 23/02/21 | North America / Mexico / State of Mexico | Human | Male   | 45 | Ambulatory   | Nasopharyngeal and oropharyngeal swab |
| hCoV-19/Mexico/MEX-INNER-IMSS-00326/2021 | EPI_ISL_1279575 | 23/02/21 | North America / Mexico / State of Mexico | Human | Male   | 69 | Hospitalized | Nasopharyngeal and oropharyngeal swab |
| hCoV-19/Mexico/MEX-INNER-IMSS-00327/2021 | EPI_ISL_1279576 | 23/02/21 | North America / Mexico / State of Mexico | Human | Male   | 48 | Hospitalized | Nasopharyngeal and oropharyngeal swab |
| hCoV-19/Mexico/MEX-INNER-IMSS-00329/2021 | EPI_ISL_1279577 | 23/02/21 | North America / Mexico / State of Mexico | Human | Male   | 47 | Hospitalized | Pharyngeal swab                       |

|                                         |                 |          |                                          |       |        |    |              |                                       |
|-----------------------------------------|-----------------|----------|------------------------------------------|-------|--------|----|--------------|---------------------------------------|
| hCoV-19/Mexico/HID-INER-IMSS-00330/2021 | EPI_ISL_1279578 | 22/02/21 | North America / Mexico / Hidalgo         | Human | Female | 37 | Hospitalized | Nasopharyngeal and oropharyngeal swab |
| hCoV-19/Mexico/HID-INER-IMSS-00332/2021 | EPI_ISL_1279580 | 22/02/21 | North America / Mexico / Hidalgo         | Human | Male   | 94 | Hospitalized | Nasopharyngeal and oropharyngeal swab |
| hCoV-19/Mexico/MOR-INER-IMSS-00333/2021 | EPI_ISL_1279581 | 22/02/21 | North America / Mexico / Morelos         | Human | Male   | 67 | Ambulatory   | Nasopharyngeal and oropharyngeal swab |
| hCoV-19/Mexico/CMX-INER-IMSS-00334/2021 | EPI_ISL_1279582 | 22/02/21 | North America / Mexico / Mexico City     | Human | Female | 37 | Ambulatory   | Nasopharyngeal and oropharyngeal swab |
| hCoV-19/Mexico/MEX-INER-IMSS-00335/2021 | EPI_ISL_1279583 | 22/02/21 | North America / Mexico / State of Mexico | Human | Male   | 25 | Ambulatory   | Nasopharyngeal and oropharyngeal swab |
| hCoV-19/Mexico/SLP-INER-IMSS-00336/2021 | EPI_ISL_1279584 | 23/02/21 | North America / Mexico / San Luis Potosi | Human | Female | 40 | Hospitalized | Nasopharyngeal and oropharyngeal swab |
| hCoV-19/Mexico/MEX-INER-IMSS-00338/2021 | EPI_ISL_1279585 | 23/02/21 | North America / Mexico / State of Mexico | Human | Male   | 70 | Ambulatory   | Nasopharyngeal and oropharyngeal swab |
| hCoV-19/Mexico/MEX-INER-IMSS-00339/2021 | EPI_ISL_1279586 | 23/02/21 | North America / Mexico / State of Mexico | Human | Male   | 52 | Ambulatory   | Nasopharyngeal and oropharyngeal swab |
| hCoV-19/Mexico/CMX-INER-IMSS-00341/2021 | EPI_ISL_1279587 | 24/02/21 | North America / Mexico / Mexico City     | Human | Female | 89 | Hospitalized | Pharyngeal swab                       |
| hCoV-19/Mexico/OAX-INER-IMSS-00343/2021 | EPI_ISL_1279589 | 22/02/21 | North America / Mexico / Oaxaca          | Human | Male   | 62 | Ambulatory   | Nasopharyngeal and oropharyngeal swab |
| hCoV-19/Mexico/OAX-INER-IMSS-00344/2021 | EPI_ISL_1279590 | 22/02/21 | North America / Mexico / Oaxaca          | Human | Female | 60 | Hospitalized | Nasopharyngeal and oropharyngeal swab |
| hCoV-19/Mexico/VER-INER-IMSS-00345/2021 | EPI_ISL_1279591 | 22/02/21 | North America / Mexico / Veracruz        | Human | Male   | 78 | Hospitalized | Nasopharyngeal and oropharyngeal swab |
| hCoV-19/Mexico/VER-INER-IMSS-00346/2021 | EPI_ISL_1279592 | 23/02/21 | North America / Mexico / Veracruz        | Human | Female | 37 | Ambulatory   | Nasopharyngeal and oropharyngeal swab |
| hCoV-19/Mexico/VER-INER-IMSS-00347/2021 | EPI_ISL_1279593 | 22/02/21 | North America / Mexico / Veracruz        | Human | Female | 59 | Hospitalized | Nasopharyngeal and oropharyngeal swab |
| hCoV-19/Mexico/VER-INER-IMSS-00348/2021 | EPI_ISL_1279594 | 22/02/21 | North America / Mexico / Veracruz        | Human | Male   | 43 | Hospitalized | Nasopharyngeal and oropharyngeal swab |
| hCoV-19/Mexico/CMX-INER-IMSS-00349/2021 | EPI_ISL_1279595 | 24/02/21 | North America / Mexico / Mexico City     | Human | Male   | 5  | Ambulatory   | Nasopharyngeal and oropharyngeal swab |
| hCoV-19/Mexico/CMX-INER-IMSS-00350/2021 | EPI_ISL_1279596 | 24/02/21 | North America / Mexico / Mexico City     | Human | Female | 38 | Hospitalized | Nasopharyngeal and oropharyngeal swab |
| hCoV-19/Mexico/MEX-INER-IMSS-00351/2021 | EPI_ISL_1279597 | 23/02/21 | North America / Mexico / State of Mexico | Human | Female | 40 | Hospitalized | Pharyngeal swab                       |
| hCoV-19/Mexico/CMX-INER-IMSS-00352/2021 | EPI_ISL_1279598 | 24/02/21 | North America / Mexico / Mexico City     | Human | Male   | 37 | Hospitalized | Nasopharyngeal and oropharyngeal swab |
| hCoV-19/Mexico/VER-INER-IMSS-00353/2021 | EPI_ISL_1279599 | 19/02/21 | North America / Mexico / Veracruz        | Human | Male   | 15 | Ambulatory   | Nasopharyngeal and oropharyngeal swab |
| hCoV-19/Mexico/CMX-INER-IMSS-00355/2021 | EPI_ISL_1279600 | 23/02/21 | North America / Mexico / Mexico City     | Human | Female | 62 | Hospitalized | Pharyngeal swab                       |
| hCoV-19/Mexico/MEX-INER-IMSS-00356/2021 | EPI_ISL_1279601 | 24/02/21 | North America / Mexico / State of Mexico | Human | Female | 49 | Hospitalized | Pharyngeal swab                       |
| hCoV-19/Mexico/VER-INER-IMSS-00357/2021 | EPI_ISL_1279602 | 18/02/21 | North America / Mexico / Veracruz        | Human | Male   | 76 | Hospitalized | Nasopharyngeal and oropharyngeal swab |
| hCoV-19/Mexico/VER-INER-IMSS-00358/2021 | EPI_ISL_1279603 | 18/02/21 | North America / Mexico / Veracruz        | Human | Male   | 82 | Hospitalized | Nasopharyngeal and oropharyngeal swab |
| hCoV-19/Mexico/ROO-INER-IMSS-00359/2021 | EPI_ISL_1279604 | 10/02/21 | North America / Mexico / Quintana Roo    | Human | Male   | 75 | Hospitalized | Nasopharyngeal and oropharyngeal swab |
| hCoV-19/Mexico/YUC-INER-IMSS-00360/2021 | EPI_ISL_1279605 | 12/02/21 | North America / Mexico / Yucatan         | Human | Male   | 21 | Ambulatory   | Nasopharyngeal swab                   |
| hCoV-19/Mexico/YUC-INER-IMSS-00361/2021 | EPI_ISL_1279606 | 12/02/21 | North America / Mexico / Yucatan         | Human | Male   | 31 | Ambulatory   | Nasopharyngeal swab                   |
| hCoV-19/Mexico/YUC-INER-IMSS-00363/2021 | EPI_ISL_1279608 | 12/02/21 | North America / Mexico / Yucatan         | Human | Female | 33 | Ambulatory   | Nasopharyngeal and oropharyngeal swab |
| hCoV-19/Mexico/YUC-INER-IMSS-00364/2021 | EPI_ISL_1279609 | 13/02/21 | North America / Mexico / Yucatan         | Human | Female | 67 | Hospitalized | Nasopharyngeal and oropharyngeal swab |
| hCoV-19/Mexico/YUC-INER-IMSS-00365/2021 | EPI_ISL_1279610 | 13/02/21 | North America / Mexico / Yucatan         | Human | Male   | 45 | Hospitalized | Nasopharyngeal and oropharyngeal swab |
| hCoV-19/Mexico/ROO-INER-IMSS-00367/2021 | EPI_ISL_1279612 | 11/02/21 | North America / Mexico / Quintana Roo    | Human | Female | 21 | Ambulatory   | Nasopharyngeal and oropharyngeal swab |
| hCoV-19/Mexico/YUC-INER-IMSS-00370/2021 | EPI_ISL_1279613 | 14/02/21 | North America / Mexico / Yucatan         | Human | Female | 90 | Hospitalized | Nasopharyngeal and oropharyngeal swab |
| hCoV-19/Mexico/CAM-INER-IMSS-00371/2021 | EPI_ISL_1279614 | 12/02/21 | North America / Mexico / Campeche        | Human | Male   | 34 | Ambulatory   | Nasopharyngeal and oropharyngeal swab |
| hCoV-19/Mexico/DUR-INER-IMSS-00273/2021 | EPI_ISL_1287772 | 16/02/21 | North America / Mexico / Durango         | Human | Female | 50 | Ambulatory   | Nasopharyngeal and oropharyngeal swab |
| hCoV-19/Mexico/TLA-INER-IMSS-00283/2021 | EPI_ISL_1287775 | 22/02/21 | North America / Mexico / Tlaxcala        | Human | Male   | 63 | Hospitalized | Nasopharyngeal and oropharyngeal swab |
| hCoV-19/Mexico/MEX-INER-IMSS-00328/2021 | EPI_ISL_1287777 | 23/02/21 | North America / Mexico / State of Mexico | Human | Female | 41 | Hospitalized | Nasopharyngeal and oropharyngeal swab |
| hCoV-19/Mexico/TLA-IBT-IMSS-137/2021    | EPI_ISL_1288153 | 10/02/21 | North America / Mexico / Tlaxcala        | Human | Female | 48 | Ambulatory   | Nasopharyngeal and oropharyngeal swab |
| hCoV-19/Mexico/MOR-IBT-IMSS-370/2021    | EPI_ISL_1288156 | 09/02/21 | North America / Mexico / Morelos         | Human | Male   | 84 | Hospitalized | Nasopharyngeal and oropharyngeal swab |
| hCoV-19/Mexico/MOR-IBT-IMSS-381/2021    | EPI_ISL_1288157 | 09/02/21 | North America / Mexico / Morelos         | Human | Female | 58 | Hospitalized | Nasopharyngeal and oropharyngeal swab |
| hCoV-19/Mexico/MOR-IBT-IMSS-392/2021    | EPI_ISL_1288158 | 09/02/21 | North America / Mexico / Morelos         | Human | Male   | 33 | Ambulatory   | Nasopharyngeal and oropharyngeal swab |
| hCoV-19/Mexico/MOR-IBT-IMSS-403/2021    | EPI_ISL_1288159 | 10/02/21 | North America / Mexico / Morelos         | Human | Male   | 50 | Ambulatory   | Nasopharyngeal and oropharyngeal swab |
| hCoV-19/Mexico/MOR-IBT-IMSS-414/2021    | EPI_ISL_1288160 | 09/02/21 | North America / Mexico / Morelos         | Human | Male   | 77 | Hospitalized | Nasopharyngeal and oropharyngeal swab |
| hCoV-19/Mexico/OAX-IBT-IMSS-59/2021     | EPI_ISL_1288164 | 09/02/21 | North America / Mexico / Oaxaca          | Human | Female | 26 | Ambulatory   | Nasopharyngeal and oropharyngeal swab |
| hCoV-19/Mexico/OAX-IBT-IMSS-114/2021    | EPI_ISL_1288168 | 09/02/21 | North America / Mexico / Oaxaca          | Human | Female | 22 | Ambulatory   | Nasopharyngeal and oropharyngeal swab |



|                                      |                 |          |                                              |       |        |    |              |                                       |
|--------------------------------------|-----------------|----------|----------------------------------------------|-------|--------|----|--------------|---------------------------------------|
| hCoV-19/Mexico/OAX-IBT-IMSS-125/2021 | EPI_ISL_1288169 | 09/02/21 | North America / Mexico / Oaxaca              | Human | Male   | 38 | Ambulatory   | Nasopharyngeal and oropharyngeal swab |
| hCoV-19/Mexico/OAX-IBT-IMSS-136/2021 | EPI_ISL_1288170 | 08/02/21 | North America / Mexico / Oaxaca              | Human | Female | 30 | Ambulatory   | Nasopharyngeal and oropharyngeal swab |
| hCoV-19/Mexico/OAX-IBT-IMSS-148/2021 | EPI_ISL_1288171 | 08/02/21 | North America / Mexico / Oaxaca              | Human | Male   | 46 | Ambulatory   | Nasopharyngeal and oropharyngeal swab |
| hCoV-19/Mexico/OAX-IBT-IMSS-159/2021 | EPI_ISL_1288172 | 08/02/21 | North America / Mexico / Oaxaca              | Human | Female | 68 | Hospitalized | Nasopharyngeal and oropharyngeal swab |
| hCoV-19/Mexico/OAX-IBT-IMSS-170/2021 | EPI_ISL_1288173 | 09/02/21 | North America / Mexico / Oaxaca              | Human | Male   | 30 | Ambulatory   | Nasopharyngeal and oropharyngeal swab |
| hCoV-19/Mexico/OAX-IBT-IMSS-171/2021 | EPI_ISL_1288174 | 09/02/21 | North America / Mexico / Oaxaca              | Human | Female | 30 | Ambulatory   | Nasopharyngeal and oropharyngeal swab |
| hCoV-19/Mexico/GRO-IBT-IMSS-193/2021 | EPI_ISL_1288176 | 09/02/21 | North America / Mexico / Guerrero            | Human | Male   | 36 | Ambulatory   | Nasopharyngeal and oropharyngeal swab |
| hCoV-19/Mexico/GRO-IBT-IMSS-204/2021 | EPI_ISL_1288177 | 09/02/21 | North America / Mexico / Guerrero            | Human | Male   | 29 | Ambulatory   | Nasopharyngeal and oropharyngeal swab |
| hCoV-19/Mexico/GRO-IBT-IMSS-215/2021 | EPI_ISL_1288178 | 07/02/21 | North America / Mexico / Guerrero            | Human | Male   | 79 | Hospitalized | Oropharyngeal swab                    |
| hCoV-19/Mexico/BCS-IBT-IMSS-282/2021 | EPI_ISL_1288182 | 09/02/21 | North America / Mexico / Baja California Sur | Human | Male   | 36 | Ambulatory   | Oropharyngeal swab                    |
| hCoV-19/Mexico/SLP-IBT-IMSS-303/2021 | EPI_ISL_1288184 | 09/02/21 | North America / Mexico / San Luis Potosi     | Human | Male   | 71 | Hospitalized | Nasopharyngeal and oropharyngeal swab |
| hCoV-19/Mexico/SLP-IBT-IMSS-314/2021 | EPI_ISL_1288185 | 10/02/21 | North America / Mexico / San Luis Potosi     | Human | Male   | 57 | Ambulatory   | Nasopharyngeal and oropharyngeal swab |
| hCoV-19/Mexico/SLP-IBT-IMSS-325/2021 | EPI_ISL_1288186 | 10/02/21 | North America / Mexico / San Luis Potosi     | Human | Female | 30 | Ambulatory   | Nasopharyngeal and oropharyngeal swab |
| hCoV-19/Mexico/SLP-IBT-IMSS-336/2021 | EPI_ISL_1288187 | 10/02/21 | North America / Mexico / San Luis Potosi     | Human | Male   | 21 | Ambulatory   | Nasopharyngeal and oropharyngeal swab |
| hCoV-19/Mexico/SLP-IBT-IMSS-347/2021 | EPI_ISL_1288188 | 10/02/21 | North America / Mexico / San Luis Potosi     | Human | Male   | 32 | Ambulatory   | Nasopharyngeal and oropharyngeal swab |
| hCoV-19/Mexico/CMX-IBT-IMSS-359/2021 | EPI_ISL_1288189 | 10/02/21 | North America / Mexico / Mexico City         | Human | Female | 23 | Ambulatory   | Nasopharyngeal and oropharyngeal swab |
| hCoV-19/Mexico/CMX-IBT-IMSS-361/2021 | EPI_ISL_1288190 | 10/02/21 | North America / Mexico / Mexico City         | Human | Female | 27 | Ambulatory   | Nasopharyngeal and oropharyngeal swab |
| hCoV-19/Mexico/CMX-IBT-IMSS-362/2021 | EPI_ISL_1288191 | 10/02/21 | North America / Mexico / Mexico City         | Human | Female | 39 | Ambulatory   | Nasopharyngeal and oropharyngeal swab |
| hCoV-19/Mexico/CMX-IBT-IMSS-363/2021 | EPI_ISL_1288192 | 11/02/21 | North America / Mexico / Mexico City         | Human | Female | 62 | Ambulatory   | Nasopharyngeal and oropharyngeal swab |
| hCoV-19/Mexico/CMX-IBT-IMSS-364/2021 | EPI_ISL_1288193 | 12/02/21 | North America / Mexico / Mexico City         | Human | Female | 65 | Ambulatory   | Nasopharyngeal and oropharyngeal swab |
| hCoV-19/Mexico/CMX-IBT-IMSS-365/2021 | EPI_ISL_1288194 | 12/02/21 | North America / Mexico / Mexico City         | Human | Female | 64 | Ambulatory   | Nasopharyngeal and oropharyngeal swab |
| hCoV-19/Mexico/CMX-IBT-IMSS-366/2021 | EPI_ISL_1288195 | 12/02/21 | North America / Mexico / Mexico City         | Human | Male   | 75 | Ambulatory   | Nasopharyngeal and oropharyngeal swab |
| hCoV-19/Mexico/CMX-IBT-IMSS-367/2021 | EPI_ISL_1288196 | 11/02/21 | North America / Mexico / Mexico City         | Human | Male   | 39 | Hospitalized | Oropharyngeal swab                    |
| hCoV-19/Mexico/CMX-IBT-IMSS-368/2021 | EPI_ISL_1288197 | 11/02/21 | North America / Mexico / Mexico City         | Human | Male   | 74 | Hospitalized | Oropharyngeal swab                    |
| hCoV-19/Mexico/MEX-IBT-IMSS-369/2021 | EPI_ISL_1288198 | 11/02/21 | North America / Mexico / State of Mexico     | Human | Female | 63 | Hospitalized | Oropharyngeal swab                    |
| hCoV-19/Mexico/MEX-IBT-IMSS-371/2021 | EPI_ISL_1288199 | 11/02/21 | North America / Mexico / State of Mexico     | Human | Male   | 72 | Hospitalized | Oropharyngeal swab                    |
| hCoV-19/Mexico/CMX-IBT-IMSS-372/2021 | EPI_ISL_1288200 | 11/02/21 | North America / Mexico / Mexico City         | Human | Male   | 69 | Hospitalized | Oropharyngeal swab                    |
| hCoV-19/Mexico/QUE-IBT-IMSS-374/2021 | EPI_ISL_1288202 | 10/02/21 | North America / Mexico / Queretaro           | Human | Female | 37 | Ambulatory   | Nasopharyngeal and oropharyngeal swab |
| hCoV-19/Mexico/QUE-IBT-IMSS-375/2021 | EPI_ISL_1288203 | 10/02/21 | North America / Mexico / Queretaro           | Human | Male   | 61 | Ambulatory   | Nasopharyngeal and oropharyngeal swab |
| hCoV-19/Mexico/QUE-IBT-IMSS-376/2021 | EPI_ISL_1288204 | 10/02/21 | North America / Mexico / Queretaro           | Human | Female | 65 | Ambulatory   | Nasopharyngeal and oropharyngeal swab |
| hCoV-19/Mexico/MEX-IBT-IMSS-377/2021 | EPI_ISL_1288205 | 11/02/21 | North America / Mexico / State of Mexico     | Human | Male   | 41 | Ambulatory   | Nasopharyngeal and oropharyngeal swab |
| hCoV-19/Mexico/MEX-IBT-IMSS-378/2021 | EPI_ISL_1288206 | 11/02/21 | North America / Mexico / State of Mexico     | Human | Female | 40 | Ambulatory   | Nasopharyngeal and oropharyngeal swab |
| hCoV-19/Mexico/MEX-IBT-IMSS-379/2021 | EPI_ISL_1288207 | 10/02/21 | North America / Mexico / State of Mexico     | Human | Female | 67 | Ambulatory   | Nasopharyngeal swab                   |
| hCoV-19/Mexico/MEX-IBT-IMSS-380/2021 | EPI_ISL_1288208 | 10/02/21 | North America / Mexico / State of Mexico     | Human | Male   | 6  | Ambulatory   | Nasopharyngeal swab                   |
| hCoV-19/Mexico/MEX-IBT-IMSS-382/2021 | EPI_ISL_1288209 | 11/02/21 | North America / Mexico / State of Mexico     | Human | Female | 68 | Ambulatory   | Nasopharyngeal and oropharyngeal swab |
| hCoV-19/Mexico/MEX-IBT-IMSS-383/2021 | EPI_ISL_1288210 | 10/02/21 | North America / Mexico / State of Mexico     | Human | Male   | 54 | Ambulatory   | Oropharyngeal swab                    |
| hCoV-19/Mexico/CMX-IBT-IMSS-384/2021 | EPI_ISL_1288211 | 11/02/21 | North America / Mexico / Mexico City         | Human | Male   | 44 | Ambulatory   | Nasopharyngeal and oropharyngeal swab |
| hCoV-19/Mexico/CMX-IBT-IMSS-385/2021 | EPI_ISL_1288212 | 12/02/21 | North America / Mexico / Mexico City         | Human | Male   | 68 | Hospitalized | Nasopharyngeal and oropharyngeal swab |
| hCoV-19/Mexico/MOR-IBT-IMSS-386/2021 | EPI_ISL_1288213 | 08/02/21 | North America / Mexico / Morelos             | Human | Male   | 76 | Hospitalized | Nasopharyngeal and oropharyngeal swab |
| hCoV-19/Mexico/MOR-IBT-IMSS-387/2021 | EPI_ISL_1288214 | 08/02/21 | North America / Mexico / Morelos             | Human | Female | 79 | Hospitalized | Nasopharyngeal and oropharyngeal swab |
| hCoV-19/Mexico/MOR-IBT-IMSS-388/2021 | EPI_ISL_1288215 | 08/02/21 | North America / Mexico / Morelos             | Human | Female | 67 | OSPITALIZAD  | Nasopharyngeal and oropharyngeal swab |
| hCoV-19/Mexico/MOR-IBT-IMSS-389/2021 | EPI_ISL_1288216 | 09/02/21 | North America / Mexico / Morelos             | Human | Male   | 67 | Ambulatory   | Nasopharyngeal and oropharyngeal swab |
| hCoV-19/Mexico/MOR-IBT-IMSS-390/2021 | EPI_ISL_1288217 | 09/02/21 | North America / Mexico / Morelos             | Human | Male   | 33 | Hospitalized | Nasopharyngeal and oropharyngeal swab |
| hCoV-19/Mexico/GRO-IBT-IMSS-391/2021 | EPI_ISL_1288218 | 10/02/21 | North America / Mexico / Guerrero            | Human | Male   | 75 | Hospitalized | Nasopharyngeal and oropharyngeal swab |



|                                      |                 |          |                                              |       |        |    |              |                                       |
|--------------------------------------|-----------------|----------|----------------------------------------------|-------|--------|----|--------------|---------------------------------------|
| hCoV-19/Mexico/PUE-IBT-IMSS-60/2021  | EPI_ISL_1288276 | 10/02/21 | North America / Mexico / Puebla              | Human | Female | 67 | Hospitalized | Nasopharyngeal and oropharyngeal swab |
| hCoV-19/Mexico/PUE-IBT-IMSS-61/2021  | EPI_ISL_1288277 | 08/02/21 | North America / Mexico / Puebla              | Human | Female | 69 | Ambulatory   | Nasopharyngeal and oropharyngeal swab |
| hCoV-19/Mexico/SLP-IBT-IMSS-68/2021  | EPI_ISL_1288284 | 11/02/21 | North America / Mexico / San Luis Potosi     | Human | Female | 46 | Ambulatory   | Nasopharyngeal and oropharyngeal swab |
| hCoV-19/Mexico/SLP-IBT-IMSS-69/2021  | EPI_ISL_1288285 | 12/02/21 | North America / Mexico / San Luis Potosi     | Human | Female | 25 | Ambulatory   | Nasopharyngeal and oropharyngeal swab |
| hCoV-19/Mexico/SLP-IBT-IMSS-71/2021  | EPI_ISL_1288286 | 12/02/21 | North America / Mexico / San Luis Potosi     | Human | Male   | 86 | Ambulatory   | Nasopharyngeal and oropharyngeal swab |
| hCoV-19/Mexico/SLP-IBT-IMSS-73/2021  | EPI_ISL_1288288 | 10/02/21 | North America / Mexico / San Luis Potosi     | Human | Female | 76 | Hospitalized | Nasopharyngeal and oropharyngeal swab |
| hCoV-19/Mexico/SLP-IBT-IMSS-74/2021  | EPI_ISL_1288289 | 10/02/21 | North America / Mexico / San Luis Potosi     | Human | Male   | 42 | Hospitalized | Nasopharyngeal and oropharyngeal swab |
| hCoV-19/Mexico/SLP-IBT-IMSS-75/2021  | EPI_ISL_1288290 | 10/02/21 | North America / Mexico / San Luis Potosi     | Human | Female | 39 | Ambulatory   | Nasopharyngeal and oropharyngeal swab |
| hCoV-19/Mexico/SLP-IBT-IMSS-76/2021  | EPI_ISL_1288291 | 12/02/21 | North America / Mexico / San Luis Potosi     | Human | Female | 54 | Ambulatory   | Nasopharyngeal and oropharyngeal swab |
| hCoV-19/Mexico/SLP-IBT-IMSS-77/2021  | EPI_ISL_1288292 | 12/02/21 | North America / Mexico / San Luis Potosi     | Human | Female | 45 | Ambulatory   | Nasopharyngeal and oropharyngeal swab |
| hCoV-19/Mexico/SLP-IBT-IMSS-78/2021  | EPI_ISL_1288293 | 10/02/21 | North America / Mexico / San Luis Potosi     | Human | Male   | 34 | Ambulatory   | Nasopharyngeal and oropharyngeal swab |
| hCoV-19/Mexico/VER-IBT-IMSS-79/2021  | EPI_ISL_1288294 | 10/02/21 | North America / Mexico / Veracruz            | Human | Female | 62 | Hospitalized | Nasopharyngeal and oropharyngeal swab |
| hCoV-19/Mexico/VER-IBT-IMSS-80/2021  | EPI_ISL_1288295 | 08/02/21 | North America / Mexico / Veracruz            | Human | Male   | 66 | Hospitalized | Nasopharyngeal and oropharyngeal swab |
| hCoV-19/Mexico/VER-IBT-IMSS-82/2021  | EPI_ISL_1288296 | 10/02/21 | North America / Mexico / Veracruz            | Human | Female | 47 | Ambulatory   | Nasopharyngeal and oropharyngeal swab |
| hCoV-19/Mexico/VER-IBT-IMSS-85/2021  | EPI_ISL_1288299 | 10/02/21 | North America / Mexico / Veracruz            | Human | Male   | 55 | Ambulatory   | Nasopharyngeal swab                   |
| hCoV-19/Mexico/VER-IBT-IMSS-86/2021  | EPI_ISL_1288300 | 10/02/21 | North America / Mexico / Veracruz            | Human | Female | 68 | Ambulatory   | Nasopharyngeal swab                   |
| hCoV-19/Mexico/VER-IBT-IMSS-87/2021  | EPI_ISL_1288301 | 10/02/21 | North America / Mexico / Veracruz            | Human | Female | 43 | Ambulatory   | Nasopharyngeal swab                   |
| hCoV-19/Mexico/VER-IBT-IMSS-89/2021  | EPI_ISL_1288303 | 10/02/21 | North America / Mexico / Veracruz            | Human | Male   | 32 | Ambulatory   | Nasopharyngeal and oropharyngeal swab |
| hCoV-19/Mexico/VER-IBT-IMSS-90/2021  | EPI_ISL_1288304 | 10/02/21 | North America / Mexico / Veracruz            | Human | Male   | 44 | Ambulatory   | Nasopharyngeal and oropharyngeal swab |
| hCoV-19/Mexico/VER-IBT-IMSS-91/2021  | EPI_ISL_1288305 | 10/02/21 | North America / Mexico / Veracruz            | Human | Male   | 40 | Ambulatory   | Nasopharyngeal and oropharyngeal swab |
| hCoV-19/Mexico/VER-IBT-IMSS-93/2021  | EPI_ISL_1288306 | 10/02/21 | North America / Mexico / Veracruz            | Human | Male   | 20 | Ambulatory   | Nasopharyngeal and oropharyngeal swab |
| hCoV-19/Mexico/CHP-IBT-IMSS-95/2021  | EPI_ISL_1288307 | 11/02/21 | North America / Mexico / Chiapas             | Human | Female | 47 | Ambulatory   | Nasopharyngeal and oropharyngeal swab |
| hCoV-19/Mexico/BCS-IBT-IMSS-97/2021  | EPI_ISL_1288309 | 08/02/21 | North America / Mexico / Baja California Sur | Human | Female | 37 | Ambulatory   | Nasopharyngeal and oropharyngeal swab |
| hCoV-19/Mexico/VER-IBT-IMSS-100/2021 | EPI_ISL_1288311 | 10/02/21 | North America / Mexico / Veracruz            | Human | Female | 72 | Hospitalized | Nasopharyngeal and oropharyngeal swab |
| hCoV-19/Mexico/BCS-IBT-IMSS-102/2021 | EPI_ISL_1288313 | 11/02/21 | North America / Mexico / Baja California Sur | Human | Male   | 52 | Ambulatory   | Nasopharyngeal and oropharyngeal swab |
| hCoV-19/Mexico/VER-IBT-IMSS-105/2021 | EPI_ISL_1288315 | 10/02/21 | North America / Mexico / Veracruz            | Human | Male   | 77 | Ambulatory   | Nasopharyngeal and oropharyngeal swab |
| hCoV-19/Mexico/BCS-IBT-IMSS-106/2021 | EPI_ISL_1288316 | 11/02/21 | North America / Mexico / Baja California Sur | Human | Male   | 60 | Ambulatory   | Nasopharyngeal and oropharyngeal swab |
| hCoV-19/Mexico/BCS-IBT-IMSS-109/2021 | EPI_ISL_1288318 | 11/02/21 | North America / Mexico / Baja California Sur | Human | Male   | 35 | Ambulatory   | Nasopharyngeal and oropharyngeal swab |
| hCoV-19/Mexico/VER-IBT-IMSS-110/2021 | EPI_ISL_1288319 | 10/02/21 | North America / Mexico / Veracruz            | Human | Female | 35 | Ambulatory   | Nasopharyngeal and oropharyngeal swab |
| hCoV-19/Mexico/VER-IBT-IMSS-112/2021 | EPI_ISL_1288321 | 10/02/21 | North America / Mexico / Veracruz            | Human | Male   | 48 | Ambulatory   | Nasopharyngeal and oropharyngeal swab |
| hCoV-19/Mexico/VER-IBT-IMSS-113/2021 | EPI_ISL_1288322 | 10/02/21 | North America / Mexico / Veracruz            | Human | Male   | 33 | Ambulatory   | Nasopharyngeal and oropharyngeal swab |
| hCoV-19/Mexico/VER-IBT-IMSS-115/2021 | EPI_ISL_1288323 | 10/02/21 | North America / Mexico / Veracruz            | Human | Male   | 43 | Ambulatory   | Nasopharyngeal and oropharyngeal swab |
| hCoV-19/Mexico/VER-IBT-IMSS-116/2021 | EPI_ISL_1288324 | 10/02/21 | North America / Mexico / Veracruz            | Human | Male   | 80 | Ambulatory   | Nasopharyngeal and oropharyngeal swab |
| hCoV-19/Mexico/VER-IBT-IMSS-117/2021 | EPI_ISL_1288325 | 10/02/21 | North America / Mexico / Veracruz            | Human | Female | 23 | Ambulatory   | Nasopharyngeal and oropharyngeal swab |
| hCoV-19/Mexico/CHP-IBT-IMSS-118/2021 | EPI_ISL_1288326 | 10/02/21 | North America / Mexico / Chiapas             | Human | Male   | 44 | Ambulatory   | Nasopharyngeal and oropharyngeal swab |
| hCoV-19/Mexico/CHP-IBT-IMSS-119/2021 | EPI_ISL_1288327 | 11/02/21 | North America / Mexico / Chiapas             | Human | Female | 57 | Ambulatory   | Nasopharyngeal and oropharyngeal swab |
| hCoV-19/Mexico/PUE-IBT-IMSS-120/2021 | EPI_ISL_1288328 | 10/02/21 | North America / Mexico / Puebla              | Human | Female | 38 | Ambulatory   | Nasopharyngeal and oropharyngeal swab |
| hCoV-19/Mexico/CHP-IBT-IMSS-122/2021 | EPI_ISL_1288329 | 11/02/21 | North America / Mexico / Chiapas             | Human | Male   | 23 | Ambulatory   | Nasopharyngeal and oropharyngeal swab |
| hCoV-19/Mexico/CHP-IBT-IMSS-123/2021 | EPI_ISL_1288330 | 10/02/21 | North America / Mexico / Chiapas             | Human | Female | 28 | Ambulatory   | Nasopharyngeal and oropharyngeal swab |
| hCoV-19/Mexico/PUE-IBT-IMSS-124/2021 | EPI_ISL_1288331 | 11/02/21 | North America / Mexico / Puebla              | Human | Male   | 54 | Ambulatory   | Nasopharyngeal swab                   |
| hCoV-19/Mexico/PUE-IBT-IMSS-126/2021 | EPI_ISL_1288332 | 10/02/21 | North America / Mexico / Puebla              | Human | Male   | 33 | Ambulatory   | Nasopharyngeal and oropharyngeal swab |
| hCoV-19/Mexico/PUE-IBT-IMSS-127/2021 | EPI_ISL_1288333 | 11/02/21 | North America / Mexico / Puebla              | Human | Male   | 39 | Ambulatory   | Nasopharyngeal swab                   |
| hCoV-19/Mexico/PUE-IBT-IMSS-128/2021 | EPI_ISL_1288334 | 11/02/21 | North America / Mexico / Puebla              | Human | Female | 19 | Ambulatory   | Nasopharyngeal and oropharyngeal swab |
| hCoV-19/Mexico/PUE-IBT-IMSS-129/2021 | EPI_ISL_1288335 | 10/02/21 | North America / Mexico / Puebla              | Human | Male   | 29 | Ambulatory   | Nasopharyngeal and oropharyngeal swab |









|                                          |                 |          |                                                    |       |         |         |              |                                       |
|------------------------------------------|-----------------|----------|----------------------------------------------------|-------|---------|---------|--------------|---------------------------------------|
| hCoV-19/Mexico/CMX-IBT-IMSS-317/2021     | EPI_ISL_1288499 | 13/02/21 | North America / Mexico / Mexico City               | Human | Male    | 72      | Hospitalized | Nasopharyngeal and oropharyngeal swab |
| hCoV-19/Mexico/MEX-IBT-IMSS-318/2021     | EPI_ISL_1288500 | 13/02/21 | North America / Mexico / State of Mexico           | Human | Male    | 62      | Ambulatory   | Nasopharyngeal and oropharyngeal swab |
| hCoV-19/Mexico/MOR-IBT-IMSS-319/2021     | EPI_ISL_1288501 | 13/02/21 | North America / Mexico / Morelos                   | Human | Male    | 65      | Ambulatory   | Nasopharyngeal and oropharyngeal swab |
| hCoV-19/Mexico/MOR-IBT-IMSS-321/2021     | EPI_ISL_1288503 | 13/02/21 | North America / Mexico / Morelos                   | Human | Female  | 65      | Hospitalized | Nasopharyngeal and oropharyngeal swab |
| hCoV-19/Mexico/MOR-IBT-IMSS-322/2021     | EPI_ISL_1288504 | 13/02/21 | North America / Mexico / Morelos                   | Human | Female  | 67      | Hospitalized | Nasopharyngeal and oropharyngeal swab |
| hCoV-19/Mexico/MOR-IBT-IMSS-323/2021     | EPI_ISL_1288505 | 13/02/21 | North America / Mexico / Morelos                   | Human | Male    | 52      | Ambulatory   | Nasopharyngeal and oropharyngeal swab |
| hCoV-19/Mexico/MOR-IBT-IMSS-324/2021     | EPI_ISL_1288506 | 13/02/21 | North America / Mexico / Morelos                   | Human | Male    | 54      | Hospitalized | Nasopharyngeal and oropharyngeal swab |
| hCoV-19/Mexico/CMX-IBT-IMSS-326/2021     | EPI_ISL_1288507 | 13/02/21 | North America / Mexico / Mexico City               | Human | Male    | 72      | Hospitalized | Nasopharyngeal swab                   |
| hCoV-19/Mexico/CMX-IBT-IMSS-327/2021     | EPI_ISL_1288508 | 13/02/21 | North America / Mexico / Mexico City               | Human | Female  | 62      | Hospitalized | Nasopharyngeal swab                   |
| hCoV-19/Mexico/CMX-IBT-IMSS-328/2021     | EPI_ISL_1288509 | 13/02/21 | North America / Mexico / Mexico City               | Human | Female  | 81      | Hospitalized | Nasopharyngeal swab                   |
| hCoV-19/Mexico/CMX-IBT-IMSS-329/2021     | EPI_ISL_1288510 | 13/02/21 | North America / Mexico / Mexico City               | Human | Male    | 39      | Hospitalized | Nasopharyngeal swab                   |
| hCoV-19/Mexico/CMX-IBT-IMSS-330/2021     | EPI_ISL_1288511 | 13/02/21 | North America / Mexico / Mexico City               | Human | Male    | 53      | Hospitalized | Nasopharyngeal swab                   |
| hCoV-19/Mexico/CMX-IBT-IMSS-331/2021     | EPI_ISL_1288512 | 13/02/21 | North America / Mexico / Mexico City               | Human | Male    | 52      | Hospitalized | Nasopharyngeal swab                   |
| hCoV-19/Mexico/HID-IBT-IMSS-332/2021     | EPI_ISL_1288513 | 13/02/21 | North America / Mexico / Hidalgo                   | Human | Female  | 33      | Ambulatory   | Oropharyngeal swab                    |
| hCoV-19/Mexico/HID-IBT-IMSS-333/2021     | EPI_ISL_1288514 | 13/02/21 | North America / Mexico / Hidalgo                   | Human | Female  | 30      | Ambulatory   | Oropharyngeal swab                    |
| hCoV-19/Mexico/CMX-IBT-IMSS-334/2021     | EPI_ISL_1288515 | 13/02/21 | North America / Mexico / Mexico City               | Human | Female  | 66      | Ambulatory   | Nasopharyngeal and oropharyngeal swab |
| hCoV-19/Mexico/MEX-IBT-IMSS-337/2021     | EPI_ISL_1288516 | 12/02/21 | North America / Mexico / State of Mexico           | Human | Male    | 72      | Hospitalized | Oropharyngeal swab                    |
| hCoV-19/Mexico/MEX-IBT-IMSS-339/2021     | EPI_ISL_1288518 | 12/02/21 | North America / Mexico / State of Mexico           | Human | Female  | 26      | Hospitalized | Nasopharyngeal and oropharyngeal swab |
| hCoV-19/Mexico/CMX-IBT-IMSS-340/2021     | EPI_ISL_1288519 | 12/02/21 | North America / Mexico / Mexico City               | Human | Male    | 9       | Ambulatory   | Nasopharyngeal and oropharyngeal swab |
| hCoV-19/Mexico/CMX-IBT-IMSS-341/2021     | EPI_ISL_1288520 | 14/02/21 | North America / Mexico / Mexico City               | Human | Female  | 7       | Ambulatory   | Nasopharyngeal and oropharyngeal swab |
| hCoV-19/Mexico/CMX-IBT-IMSS-342/2021     | EPI_ISL_1288521 | 14/02/21 | North America / Mexico / Mexico City               | Human | Male    | 56      | Hospitalized | Oropharyngeal swab                    |
| hCoV-19/Mexico/MEX-IBT-IMSS-343/2021     | EPI_ISL_1288522 | 15/02/21 | North America / Mexico / State of Mexico           | Human | Male    | 67      | Hospitalized | Nasopharyngeal swab                   |
| hCoV-19/Mexico/MEX-IBT-IMSS-344/2021     | EPI_ISL_1288523 | 14/02/21 | North America / Mexico / State of Mexico           | Human | Male    | 67      | Hospitalized | Nasopharyngeal and oropharyngeal swab |
| hCoV-19/Mexico/CMX-IBT-IMSS-345/2021     | EPI_ISL_1288524 | 12/02/21 | North America / Mexico / Mexico City               | Human | Male    | 57      | Ambulatory   | Nasopharyngeal and oropharyngeal swab |
| hCoV-19/Mexico/CMX-IBT-IMSS-346/2021     | EPI_ISL_1288525 | 12/02/21 | North America / Mexico / Mexico City               | Human | Female  | 65      | Ambulatory   | Nasopharyngeal and oropharyngeal swab |
| hCoV-19/Mexico/CMX-IBT-IMSS-350/2021     | EPI_ISL_1288527 | 12/02/21 | North America / Mexico / Mexico City               | Human | Male    | 58      | Ambulatory   | Nasopharyngeal and oropharyngeal swab |
| hCoV-19/Mexico/VER-IBT-IMSS-353/2021     | EPI_ISL_1288530 | 12/02/21 | North America / Mexico / Veracruz                  | Human | Female  | 34      | Ambulatory   | Nasopharyngeal swab                   |
| hCoV-19/Mexico/VER-IBT-IMSS-354/2021     | EPI_ISL_1288531 | 12/02/21 | North America / Mexico / Veracruz                  | Human | Male    | 49      | Ambulatory   | Nasopharyngeal and oropharyngeal swab |
| hCoV-19/Mexico/MEX-IBT-IMSS-356/2021     | EPI_ISL_1288533 | 14/02/21 | North America / Mexico / State of Mexico           | Human | Male    | 56      | Hospitalized | Nasopharyngeal and oropharyngeal swab |
| hCoV-19/Mexico/BCN-SEARCH-7360/2021      | EPI_ISL_1295671 | 10/02/21 | North America / Mexico / Baja California / Tijuana | Human | unknown | unknown | unknown      | Nasal swab                            |
| hCoV-19/Mexico/BCN-SEARCH-7370/2021      | EPI_ISL_1295676 | 08/02/21 | North America / Mexico / Baja California / Tijuana | Human | unknown | unknown | unknown      | Nasal swab                            |
| hCoV-19/Mexico/CMX-INMEGEN-03-03-01/2021 | EPI_ISL_1298451 | 20/02/21 | North America / Mexico / Mexico City               | Human | Female  | 30      | unknown      | Oropharyngeal swab                    |
| hCoV-19/Mexico/CMX-INMEGEN-03-03-02/2021 | EPI_ISL_1298452 | 20/02/21 | North America / Mexico / Mexico City               | Human | Male    | 65      | unknown      | Oropharyngeal swab                    |
| hCoV-19/Mexico/CMX-INMEGEN-03-03-04/2021 | EPI_ISL_1298454 | 19/02/21 | North America / Mexico / Mexico City               | Human | Female  | 59      | unknown      | Oropharyngeal swab                    |
| hCoV-19/Mexico/CMX-INMEGEN-03-03-05/2021 | EPI_ISL_1298455 | 20/02/21 | North America / Mexico / Mexico City               | Human | Female  | 16      | unknown      | Oropharyngeal swab                    |
| hCoV-19/Mexico/CMX-INMEGEN-03-03-06/2021 | EPI_ISL_1298456 | 20/02/21 | North America / Mexico / Mexico City               | Human | Female  | 69      | unknown      | Oropharyngeal swab                    |
| hCoV-19/Mexico/CMX-INMEGEN-03-03-07/2021 | EPI_ISL_1298457 | 22/02/21 | North America / Mexico / Mexico City               | Human | Male    | 29      | unknown      | Oropharyngeal swab                    |
| hCoV-19/Mexico/CMX-INMEGEN-03-03-08/2021 | EPI_ISL_1298458 | 22/02/21 | North America / Mexico / Mexico City               | Human | Male    | 68      | unknown      | Oropharyngeal swab                    |
| hCoV-19/Mexico/CMX-INMEGEN-03-03-09/2021 | EPI_ISL_1298459 | 22/02/21 | North America / Mexico / Mexico City               | Human | Male    | 41      | unknown      | Oropharyngeal swab                    |
| hCoV-19/Mexico/CMX-INMEGEN-03-03-10/2021 | EPI_ISL_1298460 | 22/02/21 | North America / Mexico / Mexico City               | Human | Male    | 50      | unknown      | Oropharyngeal swab                    |
| hCoV-19/Mexico/CMX-INMEGEN-03-03-11/2021 | EPI_ISL_1298461 | 22/02/21 | North America / Mexico / Mexico City               | Human | Male    | 12      | unknown      | Oropharyngeal swab                    |
| hCoV-19/Mexico/CMX-INMEGEN-03-03-13/2021 | EPI_ISL_1298463 | 22/02/21 | North America / Mexico / Mexico City               | Human | Female  | 64      | unknown      | Oropharyngeal swab                    |
| hCoV-19/Mexico/CMX-INMEGEN-03-03-14/2021 | EPI_ISL_1298464 | 22/02/21 | North America / Mexico / Mexico City               | Human | Female  | 54      | unknown      | Oropharyngeal swab                    |
| hCoV-19/Mexico/CMX-INMEGEN-03-03-15/2021 | EPI_ISL_1298465 | 20/02/21 | North America / Mexico / Mexico City               | Human | Male    | 49      | unknown      | Oropharyngeal swab                    |

|                                          |                 |          |                                          |       |        |         |              |                                       |
|------------------------------------------|-----------------|----------|------------------------------------------|-------|--------|---------|--------------|---------------------------------------|
| hCoV-19/Mexico/CMX-INMEGEN-03-03-16/2021 | EPI_ISL_1298466 | 22/02/21 | North America / Mexico / Mexico City     | Human | Female | 29      | unknown      | Oropharyngeal swab                    |
| hCoV-19/Mexico/CMX-INMEGEN-03-03-17/2021 | EPI_ISL_1298467 | 23/02/21 | North America / Mexico / Mexico City     | Human | Female | 59      | unknown      | Oropharyngeal swab                    |
| hCoV-19/Mexico/CMX-INMEGEN-03-03-18/2021 | EPI_ISL_1298468 | 22/02/21 | North America / Mexico / Mexico City     | Human | Female | 52      | unknown      | Oropharyngeal swab                    |
| hCoV-19/Mexico/CMX-INMEGEN-03-03-19/2021 | EPI_ISL_1298469 | 23/02/21 | North America / Mexico / Mexico City     | Human | Male   | 6       | unknown      | Oropharyngeal swab                    |
| hCoV-19/Mexico/CMX-INMEGEN-03-03-20/2021 | EPI_ISL_1298470 | 23/02/21 | North America / Mexico / Mexico City     | Human | Female | 76      | unknown      | Oropharyngeal swab                    |
| hCoV-19/Mexico/CMX-INMEGEN-03-03-21/2021 | EPI_ISL_1298471 | 19/02/21 | North America / Mexico / Mexico City     | Human | Female | 24      | unknown      | Oropharyngeal swab                    |
| hCoV-19/Mexico/CMX-INMEGEN-03-03-22/2021 | EPI_ISL_1298472 | 22/02/21 | North America / Mexico / Mexico City     | Human | Female | 32      | unknown      | Oropharyngeal swab                    |
| hCoV-19/Mexico/CMX-INMEGEN-03-03-23/2021 | EPI_ISL_1298473 | 24/02/21 | North America / Mexico / Mexico City     | Human | Male   | 40      | unknown      | Oropharyngeal swab                    |
| hCoV-19/Mexico/CMX-INMEGEN-03-05-16/2021 | EPI_ISL_1300425 | 22/02/21 | North America / Mexico / Mexico City     | Human | Female | 37      | unknown      |                                       |
| hCoV-19/Mexico/CMX-IBT-IMSS-568/2021     | EPI_ISL_1302156 | 02/02/21 | North America / Mexico / Mexico City     | Human | Male   | 46      | Ambulatory   | Nasopharyngeal and oropharyngeal swab |
| hCoV-19/Mexico/MEX-IBT-IMSS-547/2021     | EPI_ISL_1302157 | 30/01/21 | North America / Mexico / State of Mexico | Human | Male   | 23      | Hospitalized | Pharyngeal swab                       |
| hCoV-19/Mexico/MEX-IBT-IMSS-553/2021     | EPI_ISL_1302158 | 02/02/21 | North America / Mexico / State of Mexico | Human | Female | 65      | Hospitalized | Nasopharyngeal and oropharyngeal swab |
| hCoV-19/Mexico/SLP-IBT-IMSS-560/2021     | EPI_ISL_1302161 | 31/01/21 | North America / Mexico / San Luis Potosi | Human | Female | 25      | Ambulatory   | Nasopharyngeal and oropharyngeal swab |
| hCoV-19/Mexico/CMX-IBT-IMSS-535/2021     | EPI_ISL_1302165 | 01/02/21 | North America / Mexico / Mexico City     | Human | Male   | 51      | Ambulatory   | Nasopharyngeal and oropharyngeal swab |
| hCoV-19/Mexico/MEX-IBT-IMSS-546/2021     | EPI_ISL_1302169 | 31/01/21 | North America / Mexico / State of Mexico | Human | Female | 58      | Hospitalized | Pharyngeal swab                       |
| hCoV-19/Mexico/MEX-IBT-IMSS-544/2021     | EPI_ISL_1302172 | 29/01/21 | North America / Mexico / State of Mexico | Human | Male   | 72      | Hospitalized | Nasopharyngeal and oropharyngeal swab |
| hCoV-19/Mexico/PUE-IBT-IMSS-576/2021     | EPI_ISL_1302173 | 30/01/21 | North America / Mexico / Puebla          | Human | Male   | 41      | Ambulatory   | Nasopharyngeal and oropharyngeal swab |
| hCoV-19/Mexico/CMX-IBT-IMSS-538/2021     | EPI_ISL_1302178 | 31/01/21 | North America / Mexico / Mexico City     | Human | Female | 75      | Hospitalized | Nasopharyngeal and oropharyngeal swab |
| hCoV-19/Mexico/CMX-IBT-IMSS-572/2021     | EPI_ISL_1302190 | 02/02/21 | North America / Mexico / Mexico City     | Human | Female | 43      | Ambulatory   | Nasopharyngeal and oropharyngeal swab |
| hCoV-19/Mexico/CMX-IBT-IMSS-572/2021     | EPI_ISL_1302192 | 06/01/21 | North America / Mexico / Mexico City     | Human | Female | unknown | Hospitalized | Nasopharyngeal and oropharyngeal swab |
| hCoV-19/Mexico/MEX-IBT-IMSS-545/2021     | EPI_ISL_1302195 | 30/01/21 | North America / Mexico / State of Mexico | Human | Female | 37      | Hospitalized | Nasopharyngeal and oropharyngeal swab |
| hCoV-19/Mexico/MEX-IBT-IMSS-525/2021     | EPI_ISL_1302196 | 01/02/21 | North America / Mexico / State of Mexico | Human | Female | 82      | Hospitalized | Pharyngeal swab                       |
| hCoV-19/Mexico/CMX-IBT-IMSS-523/2021     | EPI_ISL_1302198 | 05/01/21 | North America / Mexico / Mexico City     | Human | Male   | unknown | Hospitalized | Nasopharyngeal and oropharyngeal swab |
| hCoV-19/Mexico/CMX-IBT-IMSS-523/2021     | EPI_ISL_1302203 | 31/01/21 | North America / Mexico / Mexico City     | Human | Male   | 71      | Hospitalized | Pharyngeal swab                       |
| hCoV-19/Mexico/CMX-IBT-IMSS-530/2021     | EPI_ISL_1302204 | 31/01/21 | North America / Mexico / Mexico City     | Human | Male   | 50      | Ambulatory   | Pharyngeal swab                       |
| hCoV-19/Mexico/BCN-IBT-IMSS-519/2021     | EPI_ISL_1302220 | 30/01/21 | North America / Mexico / Baja California | Human | Male   | 35      | Ambulatory   | Nasopharyngeal and oropharyngeal swab |
| hCoV-19/Mexico/CMX-IBT-IMSS-524/2021     | EPI_ISL_1302221 | 03/02/21 | North America / Mexico / Mexico City     | Human | Female | 25      | Ambulatory   | Nasopharyngeal and oropharyngeal swab |
| hCoV-19/Mexico/CMX-IBT-IMSS-529/2021     | EPI_ISL_1302222 | 02/02/21 | North America / Mexico / Mexico City     | Human | Female | 28      | Hospitalized | Nasopharyngeal and oropharyngeal swab |
| hCoV-19/Mexico/CMX-IBT-IMSS-536/2021     | EPI_ISL_1302223 | 01/02/21 | North America / Mexico / Mexico City     | Human | Male   | 45      | Hospitalized | Nasopharyngeal and oropharyngeal swab |
| hCoV-19/Mexico/CMX-IBT-IMSS-563/2021     | EPI_ISL_1302224 | 02/02/21 | North America / Mexico / Mexico City     | Human | Female | 25      | Ambulatory   | Nasopharyngeal and oropharyngeal swab |
| hCoV-19/Mexico/CMX-IBT-IMSS-571/2021     | EPI_ISL_1302225 | 02/02/21 | North America / Mexico / Mexico City     | Human | Female | 27      | Ambulatory   | Nasopharyngeal and oropharyngeal swab |
| hCoV-19/Mexico/CMX-IBT-IMSS-573/2021     | EPI_ISL_1302226 | 02/02/21 | North America / Mexico / Mexico City     | Human | Male   | 41      | Ambulatory   | Nasopharyngeal and oropharyngeal swab |
| hCoV-19/Mexico/CMX-IBT-IMSS-573/2021     | EPI_ISL_1302227 | 04/01/21 | North America / Mexico / Mexico City     | Human | Male   | unknown | Hospitalized | Nasopharyngeal and oropharyngeal swab |
| hCoV-19/Mexico/HID-IBT-IMSS-514/2021     | EPI_ISL_1302235 | 31/01/21 | North America / Mexico / Hidalgo         | Human | Female | 56      | Hospitalized | Nasopharyngeal and oropharyngeal swab |
| hCoV-19/Mexico/MEX-IBT-IMSS-515/2021     | EPI_ISL_1302236 | 29/01/21 | North America / Mexico / State of Mexico | Human | Male   | 39      | Hospitalized | Nasopharyngeal and oropharyngeal swab |
| hCoV-19/Mexico/SLP-IBT-IMSS-584/2021     | EPI_ISL_1302237 | 30/01/21 | North America / Mexico / San Luis Potosi | Human | Female | 30      | Ambulatory   | Nasopharyngeal and oropharyngeal swab |
| hCoV-19/Mexico/VER-IBT-IMSS-527/2021     | EPI_ISL_1302238 | 30/01/21 | North America / Mexico / Veracruz        | Human | Female | 71      | Hospitalized | Nasopharyngeal and oropharyngeal swab |
| hCoV-19/Mexico/CMX-IBT-IMSS-586/2021     | EPI_ISL_1302244 | 03/02/21 | North America / Mexico / Mexico City     | Human | Male   | 53      | Ambulatory   | Nasopharyngeal and oropharyngeal swab |
| hCoV-19/Mexico/CMX-IBT-IMSS-586/2021     | EPI_ISL_1302245 | 04/01/21 | North America / Mexico / Mexico City     | Human | Female | unknown | Hospitalized | Nasopharyngeal and oropharyngeal swab |
| hCoV-19/Mexico/MEX-IBT-IMSS-542/2021     | EPI_ISL_1302248 | 01/02/21 | North America / Mexico / State of Mexico | Human | Male   | 70      | Hospitalized | Pharyngeal swab                       |
| hCoV-19/Mexico/MEX-IBT-IMSS-540/2021     | EPI_ISL_1302251 | 01/02/21 | North America / Mexico / State of Mexico | Human | Male   | 62      | Hospitalized | Pharyngeal swab                       |
| hCoV-19/Mexico/VER-IBT-IMSS-555/2021     | EPI_ISL_1302260 | 31/01/21 | North America / Mexico / Veracruz        | Human | Male   | 58      | Hospitalized | Nasopharyngeal and oropharyngeal swab |
| hCoV-19/Mexico/CMX-IBT-IMSS-526/2021     | EPI_ISL_1302261 | 01/02/21 | North America / Mexico / Mexico City     | Human | Male   | 75      | Hospitalized | Pharyngeal swab                       |
| hCoV-19/Mexico/PUE-IBT-IMSS-575/2021     | EPI_ISL_1302268 | 31/01/21 | North America / Mexico / Puebla          | Human | Female | 40      | Ambulatory   | Pharyngeal swab                       |

|                                          |                 |          |                                          |       |        |         |              |                                       |
|------------------------------------------|-----------------|----------|------------------------------------------|-------|--------|---------|--------------|---------------------------------------|
| hCoV-19/Mexico/MEX-IBT-IMSS-550/2021     | EPI_ISL_1302270 | 01/02/21 | North America / Mexico / State of Mexico | Human | Male   | 52      | Hospitalized | Nasopharyngeal and oropharyngeal swab |
| hCoV-19/Mexico/CMX-IBT-IMSS-518/2021     | EPI_ISL_1302272 | 01/02/21 | North America / Mexico / Mexico City     | Human | Female | 31      | Ambulatory   | Nasopharyngeal and oropharyngeal swab |
| hCoV-19/Mexico/CMX-IBT-IMSS-518/2021     | EPI_ISL_1302273 | 04/01/21 | North America / Mexico / Mexico City     | Human | Female | unknown | Hospitalized | Nasopharyngeal and oropharyngeal swab |
| hCoV-19/Mexico/CMX-IBT-IMSS-528/2021     | EPI_ISL_1302275 | 31/01/21 | North America / Mexico / Mexico City     | Human | Female | 56      | Ambulatory   | Pharyngeal swab                       |
| hCoV-19/Mexico/CMX-IBT-IMSS-528/2021     | EPI_ISL_1302278 | 04/01/21 | North America / Mexico / Mexico City     | Human | Male   | unknown | Hospitalized | Nasopharyngeal and oropharyngeal swab |
| hCoV-19/Mexico/CMX-IBT-IMSS-567/2021     | EPI_ISL_1302281 | 02/02/21 | North America / Mexico / Mexico City     | Human | Female | 64      | Ambulatory   | Nasopharyngeal and oropharyngeal swab |
| hCoV-19/Mexico/QUE-IBT-IMSS-516/2021     | EPI_ISL_1302282 | 31/01/21 | North America / Mexico / Queretaro       | Human | Male   | 56      | Hospitalized | Nasopharyngeal and oropharyngeal swab |
| hCoV-19/Mexico/CMX-IBT-IMSS-521/2021     | EPI_ISL_1302284 | 29/01/21 | North America / Mexico / Mexico City     | Human | Female | 43      | Ambulatory   | Nasopharyngeal and oropharyngeal swab |
| hCoV-19/Mexico/SLP-IBT-IMSS-581/2021     | EPI_ISL_1302285 | 01/02/21 | North America / Mexico / San Luis Potosi | Human | Male   | 60      | Ambulatory   | Nasopharyngeal and oropharyngeal swab |
| hCoV-19/Mexico/PUE-IBT-IMSS-574/2021     | EPI_ISL_1302288 | 31/01/21 | North America / Mexico / Puebla          | Human | Female | 39      | Ambulatory   | Pharyngeal swab                       |
| hCoV-19/Mexico/CMX-IBT-IMSS-531/2021     | EPI_ISL_1302294 | 29/01/21 | North America / Mexico / Mexico City     | Human | Female | 32      | Ambulatory   | Nasopharyngeal and oropharyngeal swab |
| hCoV-19/Mexico/CMX-IBT-IMSS-531/2021     | EPI_ISL_1302306 | 04/01/21 | North America / Mexico / Mexico City     | Human | Female | unknown | Hospitalized | Nasopharyngeal and oropharyngeal swab |
| hCoV-19/Mexico/SLP-IBT-IMSS-561/2021     | EPI_ISL_1302311 | 31/01/21 | North America / Mexico / San Luis Potosi | Human | Male   | 19      | Ambulatory   | Nasopharyngeal and oropharyngeal swab |
| hCoV-19/Mexico/CMX-IBT-IMSS-533/2021     | EPI_ISL_1302315 | 01/02/21 | North America / Mexico / Mexico City     | Human | Male   | 61      | Hospitalized | Nasopharyngeal and oropharyngeal swab |
| hCoV-19/Mexico/CMX-IBT-IMSS-533/2021     | EPI_ISL_1302316 | 05/01/21 | North America / Mexico / Mexico City     | Human | Male   | unknown | Hospitalized | Nasopharyngeal and oropharyngeal swab |
| hCoV-19/Mexico/SLP-IBT-IMSS-580/2021     | EPI_ISL_1302318 | 01/02/21 | North America / Mexico / San Luis Potosi | Human | Male   | 40      | Ambulatory   | Nasopharyngeal and oropharyngeal swab |
| hCoV-19/Mexico/CMX-IBT-IMSS-569/2021     | EPI_ISL_1302324 | 02/02/21 | North America / Mexico / Mexico City     | Human | Female | 51      | Ambulatory   | Nasopharyngeal and oropharyngeal swab |
| hCoV-19/Mexico/CMX-IBT-IMSS-569/2021     | EPI_ISL_1302327 | 11/01/21 | North America / Mexico / Mexico City     | Human | Female | unknown | Hospitalized | Nasopharyngeal and oropharyngeal swab |
| hCoV-19/Mexico/SLP-IBT-IMSS-585/2021     | EPI_ISL_1302332 | 30/01/21 | North America / Mexico / San Luis Potosi | Human | Male   | 62      | Hospitalized | Nasopharyngeal and oropharyngeal swab |
| hCoV-19/Mexico/VER-IBT-IMSS-556/2021     | EPI_ISL_1302341 | 30/01/21 | North America / Mexico / Veracruz        | Human | Male   | 60      | Hospitalized | Nasopharyngeal and oropharyngeal swab |
| hCoV-19/Mexico/CMX-IBT-IMSS-537/2021     | EPI_ISL_1302347 | 01/02/21 | North America / Mexico / Mexico City     | Human | Male   | 80      | Hospitalized | Pharyngeal swab                       |
| hCoV-19/Mexico/MEX-IBT-IMSS-543/2021     | EPI_ISL_1302348 | 01/02/21 | North America / Mexico / State of Mexico | Human | Male   | 58      | Hospitalized | Pharyngeal swab                       |
| hCoV-19/Mexico/MEX-IBT-IMSS-549/2021     | EPI_ISL_1302351 | 01/02/21 | North America / Mexico / State of Mexico | Human | Male   | 56      | Hospitalized | Nasopharyngeal and oropharyngeal swab |
| hCoV-19/Mexico/SLP-IBT-IMSS-562/2021     | EPI_ISL_1302352 | 31/01/21 | North America / Mexico / San Luis Potosi | Human | Female | 58      | Ambulatory   | Nasopharyngeal and oropharyngeal swab |
| hCoV-19/Mexico/SLP-IBT-IMSS-583/2021     | EPI_ISL_1302353 | 30/01/21 | North America / Mexico / San Luis Potosi | Human | Male   | 53      | Hospitalized | Nasopharyngeal and oropharyngeal swab |
| hCoV-19/Mexico/CMX-IBT-IMSS-520/2021     | EPI_ISL_1302355 | 29/01/21 | North America / Mexico / Mexico City     | Human | Female | 26      | Ambulatory   | Nasopharyngeal and oropharyngeal swab |
| hCoV-19/Mexico/MEX-IBT-IMSS-552/2021     | EPI_ISL_1302359 | 01/02/21 | North America / Mexico / State of Mexico | Human | Male   | 61      | Hospitalized | Nasopharyngeal and oropharyngeal swab |
| hCoV-19/Mexico/CMX-IBT-IMSS-552/2021     | EPI_ISL_1302360 | 04/01/21 | North America / Mexico / Mexico City     | Human | Female | unknown | Hospitalized | Nasopharyngeal and oropharyngeal swab |
| hCoV-19/Mexico/SLP-IBT-IMSS-578/2021     | EPI_ISL_1302362 | 01/02/21 | North America / Mexico / San Luis Potosi | Human | Female | 67      | Ambulatory   | Nasopharyngeal and oropharyngeal swab |
| hCoV-19/Mexico/SLP-IBT-IMSS-582/2021     | EPI_ISL_1302367 | 01/02/21 | North America / Mexico / San Luis Potosi | Human | Male   | 70      | Hospitalized | Nasopharyngeal and oropharyngeal swab |
| hCoV-19/Mexico/MEX-IBT-IMSS-541/2021     | EPI_ISL_1302370 | 01/02/21 | North America / Mexico / State of Mexico | Human | Female | 58      | Hospitalized | Pharyngeal swab                       |
| hCoV-19/Mexico/CMX-IBT-IMSS-570/2021     | EPI_ISL_1302372 | 02/02/21 | North America / Mexico / Mexico City     | Human | Male   | 59      | Ambulatory   | Nasopharyngeal and oropharyngeal swab |
| hCoV-19/Mexico/CMX-IBT-IMSS-570/2021     | EPI_ISL_1302374 | 04/01/21 | North America / Mexico / Mexico City     | Human | Female | unknown | Hospitalized | Nasopharyngeal and oropharyngeal swab |
| hCoV-19/Mexico/CMX-IBT-IMSS-570/2021     | EPI_ISL_1302376 | 04/01/21 | North America / Mexico / Mexico City     | Human | Male   | unknown | Hospitalized | Nasopharyngeal and oropharyngeal swab |
| hCoV-19/Mexico/CMX-IBT-IMSS-534/2021     | EPI_ISL_1302378 | 01/02/21 | North America / Mexico / Mexico City     | Human | Female | 49      | Hospitalized | Nasopharyngeal and oropharyngeal swab |
| hCoV-19/Mexico/CMX-IBT-IMSS-565/2021     | EPI_ISL_1302379 | 02/02/21 | North America / Mexico / Mexico City     | Human | Male   | 39      | Ambulatory   | Nasopharyngeal and oropharyngeal swab |
| hCoV-19/Mexico/CMX-IBT-IMSS-565/2021     | EPI_ISL_1302387 | 05/01/21 | North America / Mexico / Mexico City     | Human | Male   | unknown | Hospitalized | Nasopharyngeal and oropharyngeal swab |
| hCoV-19/Mexico/PUE-IBT-IMSS-577/2021     | EPI_ISL_1302390 | 29/01/21 | North America / Mexico / Puebla          | Human | Female | 56      | Ambulatory   | Nasopharyngeal and oropharyngeal swab |
| hCoV-19/Mexico/CMX-IBT-IMSS-566/2021     | EPI_ISL_1302392 | 03/02/21 | North America / Mexico / Mexico City     | Human | Female | 76      | Hospitalized | Nasopharyngeal and oropharyngeal swab |
| hCoV-19/Mexico/MEX-IBT-IMSS-539/2021     | EPI_ISL_1302393 | 02/02/21 | North America / Mexico / State of Mexico | Human | Female | 44      | Hospitalized | Pharyngeal swab                       |
| hCoV-19/Mexico/QUE-IBT-IMSS-517/2021     | EPI_ISL_1302401 | 31/01/21 | North America / Mexico / Queretaro       | Human | Male   | 87      | Hospitalized | Nasopharyngeal and oropharyngeal swab |
| hCoV-19/Mexico/CMX-INMEGEN-03-05-46/2021 | EPI_ISL_1310808 | 01/03/21 | North America / Mexico / Mexico City     | Human | Male   | 32      | unknown      |                                       |
| hCoV-19/Mexico/CMX-INMEGEN-03-05-50/2021 | EPI_ISL_1310811 | 27/02/21 | North America / Mexico / Mexico City     | Human | Male   | 22      | unknown      |                                       |
| hCoV-19/Mexico/CMX-INMEGEN-03-08-01/2021 | EPI_ISL_1315479 | 25/02/21 | North America / Mexico / Mexico City     | Human | Female | 58      | unknown      | Oropharyngeal swab                    |





|                                           |                 |          |                                      |       |        |         |              |                                    |
|-------------------------------------------|-----------------|----------|--------------------------------------|-------|--------|---------|--------------|------------------------------------|
| hCoV-19/Mexico/GUA-InDRE_F10357_S634/2021 | EPI_ISL_1340614 | 19/02/21 | North America / Mexico / Guanajuato  | Human | Male   | 29      | Released     | Oropharyngeal swab                 |
| hCoV-19/Mexico/GUA-InDRE_F10367_S637/2021 | EPI_ISL_1340616 | 19/02/21 | North America / Mexico / Guanajuato  | Human | Female | 17      | Released     | Oropharyngeal swab                 |
| hCoV-19/Mexico/GUA-InDRE_F10395_S644/2021 | EPI_ISL_1340617 | 19/02/21 | North America / Mexico / Guanajuato  | Human | Male   | 41      | Released     | Oropharyngeal swab                 |
| hCoV-19/Mexico/QUE-InDRE_F90B_S612/2021   | EPI_ISL_1340619 | 18/02/21 | North America / Mexico / Queretaro   | Human | Female | 51      | Deceased     | Oropharyngeal swab                 |
| hCoV-19/Mexico/CMX-InDRE_F115B_S615/2021  | EPI_ISL_1340620 | 18/02/21 | North America / Mexico / Mexico City | Human | Male   | 23      | Released     | Oropharyngeal swab                 |
| hCoV-19/Mexico/CMX-InDRE_F116B_S616/2021  | EPI_ISL_1340621 | 18/02/21 | North America / Mexico / Mexico City | Human | Male   | 54      | Released     | Oropharyngeal swab                 |
| hCoV-19/Mexico/CMX-InDRE_F117B_S617/2021  | EPI_ISL_1340623 | 18/02/21 | North America / Mexico / Mexico City | Human | Male   | 44      | Released     | Oropharyngeal swab                 |
| hCoV-19/Mexico/GUA-InDRE_F10348_S631/2021 | EPI_ISL_1340624 | 18/02/21 | North America / Mexico / Guanajuato  | Human | Male   | 57      | Hospitalized | Oropharyngeal swab                 |
| hCoV-19/Mexico/GUA-InDRE_F10358_S635/2021 | EPI_ISL_1340626 | 18/02/21 | North America / Mexico / Guanajuato  | Human | Female | 33      | Released     | Oropharyngeal swab                 |
| hCoV-19/Mexico/GUA-InDRE_F10391_S643/2021 | EPI_ISL_1340627 | 18/02/21 | North America / Mexico / Guanajuato  | Human | Female | 65      | Released     | Oropharyngeal swab                 |
| hCoV-19/Mexico/CMX-InDRE_F97I_S613/2021   | EPI_ISL_1340629 | 17/02/21 | North America / Mexico / Mexico City | Human | Female | unknown | Released     | Oropharyngeal swab                 |
| hCoV-19/Mexico/GUA-InDRE_F10349_S632/2021 | EPI_ISL_1340630 | 17/02/21 | North America / Mexico / Guanajuato  | Human | Female | 44      | Hospitalized | Oropharyngeal swab                 |
| hCoV-19/Mexico/GUA-InDRE_F10382_S641/2021 | EPI_ISL_1340631 | 17/02/21 | North America / Mexico / Guanajuato  | Human | Male   | 39      | Released     | Oropharyngeal swab                 |
| hCoV-19/Mexico/GUA-InDRE_F10387_S642/2021 | EPI_ISL_1340633 | 17/02/21 | North America / Mexico / Guanajuato  | Human | Male   | 38      | Released     | Oropharyngeal swab                 |
| hCoV-19/Mexico/QUE-InDRE_F88B_S610/2021   | EPI_ISL_1340634 | 16/02/21 | North America / Mexico / Queretaro   | Human | Male   | 40      | Released     | Oropharyngeal swab                 |
| hCoV-19/Mexico/QUE-InDRE_F9843_S620/2021  | EPI_ISL_1340636 | 16/02/21 | North America / Mexico / Queretaro   | Human | Male   | 24      | Released     | Oropharyngeal swab                 |
| hCoV-19/Mexico/QUE-InDRE_F9847_S621/2021  | EPI_ISL_1340637 | 16/02/21 | North America / Mexico / Queretaro   | Human | Female | 34      | Released     | Oropharyngeal swab                 |
| hCoV-19/Mexico/QUE-InDRE_F9848_S622/2021  | EPI_ISL_1340639 | 16/02/21 | North America / Mexico / Queretaro   | Human | Female | 39      | Released     | Oropharyngeal swab                 |
| hCoV-19/Mexico/HID-InDRE_F10298_S626/2021 | EPI_ISL_1340640 | 16/02/21 | North America / Mexico / Hidalgo     | Human | Male   | 51      | Deceased     | Oropharyngeal swab                 |
| hCoV-19/Mexico/HID-InDRE_F10306_S627/2021 | EPI_ISL_1340642 | 16/02/21 | North America / Mexico / Hidalgo     | Human | Male   | 68      | Hospitalized | Oropharyngeal swab                 |
| hCoV-19/Mexico/GUA-InDRE_F10333_S628/2021 | EPI_ISL_1340643 | 16/02/21 | North America / Mexico / Guanajuato  | Human | Female | 43      | Deceased     | Oropharyngeal swab                 |
| hCoV-19/Mexico/GUA-InDRE_F10345_S629/2021 | EPI_ISL_1340644 | 16/02/21 | North America / Mexico / Guanajuato  | Human | Male   | 52      | Hospitalized | Oropharyngeal swab                 |
| hCoV-19/Mexico/GUA-InDRE_F10347_S630/2021 | EPI_ISL_1340646 | 16/02/21 | North America / Mexico / Guanajuato  | Human | Female | 90      | Hospitalized | Oropharyngeal swab                 |
| hCoV-19/Mexico/GUA-InDRE_F10379_S638/2021 | EPI_ISL_1340647 | 16/02/21 | North America / Mexico / Guanajuato  | Human | Female | 18      | Released     | Oropharyngeal swab                 |
| hCoV-19/Mexico/GUA-InDRE_F10380_S639/2021 | EPI_ISL_1340648 | 16/02/21 | North America / Mexico / Guanajuato  | Human | Male   | 21      | Released     | Oropharyngeal swab                 |
| hCoV-19/Mexico/GUA-InDRE_F10381_S640/2021 | EPI_ISL_1340650 | 16/02/21 | North America / Mexico / Guanajuato  | Human | Male   | 33      | Released     | Oropharyngeal swab                 |
| hCoV-19/Mexico/PUE-InDRE_F10410_S645/2021 | EPI_ISL_1340651 | 16/02/21 | North America / Mexico / Puebla      | Human | Male   | 49      | Released     | Oropharyngeal swab                 |
| hCoV-19/Mexico/PUE-InDRE_F10412_S646/2021 | EPI_ISL_1340652 | 16/02/21 | North America / Mexico / Puebla      | Human | Female | 63      | Released     | Oropharyngeal swab                 |
| hCoV-19/Mexico/QUE-InDRE_F89B_S611/2021   | EPI_ISL_1340654 | 15/02/21 | North America / Mexico / Queretaro   | Human | Female | 28      | Released     | Oropharyngeal swab                 |
| hCoV-19/Mexico/QUE-InDRE_F9839_S618/2021  | EPI_ISL_1340655 | 15/02/21 | North America / Mexico / Queretaro   | Human | Male   | 58      | Released     | Oropharyngeal swab                 |
| hCoV-19/Mexico/QUE-InDRE_F9841_S619/2021  | EPI_ISL_1340657 | 15/02/21 | North America / Mexico / Queretaro   | Human | Female | 46      | Released     | Oropharyngeal swab                 |
| hCoV-19/Mexico/YUC-InDRE_F9950_S623/2021  | EPI_ISL_1340658 | 15/02/21 | North America / Mexico / Yucatan     | Human | Female | 44      | Released     | Oropharyngeal swab                 |
| hCoV-19/Mexico/ZAC-InDRE_F10108_S625/2021 | EPI_ISL_1340660 | 15/02/21 | North America / Mexico / Zacatecas   | Human | Female | 68      | Released     | Oropharyngeal swab                 |
| hCoV-19/Mexico/YUC-InDRE_F9951_S624/2021  | EPI_ISL_1340661 | 14/02/21 | North America / Mexico / Yucatan     | Human | Female | 39      | Released     | Oropharyngeal swab                 |
| CoV-19/Mexico/TAM_LANGEBIO_IMSS_0003/2021 | EPI_ISL_1351420 | 22/02/21 | North America / Mexico / Nuevo Leon  | Human | Female | 42      | Ambulatory   | Pharyngeal and Nasopharyngeal swab |
| CoV-19/Mexico/TAM_LANGEBIO_IMSS_0004/2021 | EPI_ISL_1351422 | 22/02/21 | North America / Mexico / Nuevo Leon  | Human | Male   | 54      | Hospitalized | Pharyngeal and Nasopharyngeal swab |
| CoV-19/Mexico/TAM_LANGEBIO_IMSS_0006/2021 | EPI_ISL_1351424 | 22/02/21 | North America / Mexico / Nuevo Leon  | Human | Male   | 19      | Ambulatory   | Pharyngeal and Nasopharyngeal swab |
| CoV-19/Mexico/TAM_LANGEBIO_IMSS_0010/2021 | EPI_ISL_1351433 | 25/02/21 | North America / Mexico / Tamaulipas  | Human | Female | 24      | Ambulatory   | Pharyngeal and Nasopharyngeal swab |
| CoV-19/Mexico/TAM_LANGEBIO_IMSS_0014/2021 | EPI_ISL_1351441 | 03/03/21 | North America / Mexico / Coahuila    | Human | Male   | 36      | Ambulatory   | Pharyngeal and Nasopharyngeal swab |
| CoV-19/Mexico/TAM_LANGEBIO_IMSS_0015/2021 | EPI_ISL_1351443 | 02/03/21 | North America / Mexico / Coahuila    | Human | Male   | 55      | Hospitalized | Pharyngeal and Nasopharyngeal swab |
| CoV-19/Mexico/TAM_LANGEBIO_IMSS_0016/2021 | EPI_ISL_1351445 | 03/03/21 | North America / Mexico / Nuevo Leon  | Human | Male   | 74      | Hospitalized | Pharyngeal and Nasopharyngeal swab |
| CoV-19/Mexico/TAM_LANGEBIO_IMSS_0021/2021 | EPI_ISL_1351460 | 04/03/21 | North America / Mexico / Nuevo Leon  | Human | Female | 28      | Ambulatory   | Pharyngeal and Nasopharyngeal swab |
| CoV-19/Mexico/TAM_LANGEBIO_IMSS_0022/2021 | EPI_ISL_1351462 | 04/03/21 | North America / Mexico / Nuevo Leon  | Human | Male   | 61      | Hospitalized | Nasopharyngeal swab                |
| CoV-19/Mexico/TAM_LANGEBIO_IMSS_0023/2021 | EPI_ISL_1351465 | 21/02/21 | North America / Mexico / Yucatan     | Human | Male   | 75      | Hospitalized | Pharyngeal and Nasopharyngeal swab |





|                                                           |          |                                          |       |        |    |              |                                    |
|-----------------------------------------------------------|----------|------------------------------------------|-------|--------|----|--------------|------------------------------------|
| 1CoV-19/Mexico/TAM_LANGEBIO_IMSS_0095/2021EPI_ISL_1351679 | 06/03/21 | North America / Mexico / Jalisco         | Human | Female | 77 | Deceased     | Pharyngeal and Nasopharyngeal swab |
| 1CoV-19/Mexico/TAM_LANGEBIO_IMSS_0096/2021EPI_ISL_1351682 | 08/03/21 | North America / Mexico / Jalisco         | Human | Female | 63 | Ambulatory   | Pharyngeal and Nasopharyngeal swab |
| 1CoV-19/Mexico/TAM_LANGEBIO_IMSS_0097/2021EPI_ISL_1351685 | 07/03/21 | North America / Mexico / Jalisco         | Human | Male   | 81 | Hospitalized | Pharyngeal and Nasopharyngeal swab |
| 1CoV-19/Mexico/TAM_LANGEBIO_IMSS_0098/2021EPI_ISL_1351688 | 07/03/21 | North America / Mexico / Nayarit         | Human | Female | 59 | Hospitalized | Pharyngeal and Nasopharyngeal swab |
| 1CoV-19/Mexico/TAM_LANGEBIO_IMSS_0099/2021EPI_ISL_1351691 | 06/03/21 | North America / Mexico / Guanajuato      | Human | Male   | 34 | Ambulatory   | Pharyngeal and Nasopharyngeal swab |
| 1CoV-19/Mexico/TAM_LANGEBIO_IMSS_0101/2021EPI_ISL_1351697 | 06/03/21 | North America / Mexico / Jalisco         | Human | Female | 67 | Ambulatory   | Pharyngeal and Nasopharyngeal swab |
| 1CoV-19/Mexico/TAM_LANGEBIO_IMSS_0104/2021EPI_ISL_1351706 | 08/03/21 | North America / Mexico / Jalisco         | Human | Male   | 63 | Hospitalized | Pharyngeal and Nasopharyngeal swab |
| 1CoV-19/Mexico/TAM_LANGEBIO_IMSS_0106/2021EPI_ISL_1351713 | 03/03/21 | North America / Mexico / San Luis Potosi | Human | Female | 43 | Ambulatory   | Pharyngeal and Nasopharyngeal swab |
| 1CoV-19/Mexico/TAM_LANGEBIO_IMSS_0107/2021EPI_ISL_1351716 | 03/03/21 | North America / Mexico / San Luis Potosi | Human | Female | 78 | Hospitalized | Pharyngeal and Nasopharyngeal swab |
| 1CoV-19/Mexico/TAM_LANGEBIO_IMSS_0108/2021EPI_ISL_1351719 | 03/03/21 | North America / Mexico / San Luis Potosi | Human | Female | 64 | Hospitalized | Pharyngeal and Nasopharyngeal swab |
| 1CoV-19/Mexico/TAM_LANGEBIO_IMSS_0110/2021EPI_ISL_1351728 | 03/03/21 | North America / Mexico / San Luis Potosi | Human | Female | 67 | Hospitalized | Pharyngeal and Nasopharyngeal swab |
| 1CoV-19/Mexico/TAM_LANGEBIO_IMSS_0111/2021EPI_ISL_1351731 | 05/03/21 | North America / Mexico / Mexico City     | Human | Male   | 53 | Hospitalized | Pharyngeal and Nasopharyngeal swab |
| 1CoV-19/Mexico/TAM_LANGEBIO_IMSS_0112/2021EPI_ISL_1351734 | 04/03/21 | North America / Mexico / Mexico City     | Human | Male   | 29 | Ambulatory   | Pharyngeal and Nasopharyngeal swab |
| 1CoV-19/Mexico/TAM_LANGEBIO_IMSS_0113/2021EPI_ISL_1351737 | 04/03/21 | North America / Mexico / Mexico City     | Human | Male   | 25 | Ambulatory   | Pharyngeal and Nasopharyngeal swab |
| 1CoV-19/Mexico/TAM_LANGEBIO_IMSS_0114/2021EPI_ISL_1351739 | 04/03/21 | North America / Mexico / Mexico City     | Human | Male   | 50 | Ambulatory   | Pharyngeal and Nasopharyngeal swab |
| 1CoV-19/Mexico/TAM_LANGEBIO_IMSS_0116/2021EPI_ISL_1351746 | 04/03/21 | North America / Mexico / Mexico City     | Human | Male   | 68 | Hospitalized | Pharyngeal and Nasopharyngeal swab |
| 1CoV-19/Mexico/TAM_LANGEBIO_IMSS_0117/2021EPI_ISL_1351749 | 04/03/21 | North America / Mexico / Mexico City     | Human | Male   | 42 | Hospitalized | Bronchoalveolar lavage             |
| 1CoV-19/Mexico/TAM_LANGEBIO_IMSS_0118/2021EPI_ISL_1351752 | 03/03/21 | North America / Mexico / Mexico City     | Human | Female | 67 | Hospitalized | Pharyngeal and Nasopharyngeal swab |
| 1CoV-19/Mexico/TAM_LANGEBIO_IMSS_0119/2021EPI_ISL_1351754 | 04/03/21 | North America / Mexico / Mexico City     | Human | Male   | 25 | Ambulatory   | Pharyngeal and Nasopharyngeal swab |
| 1CoV-19/Mexico/TAM_LANGEBIO_IMSS_0121/2021EPI_ISL_1351760 | 04/03/21 | North America / Mexico / Mexico City     | Human | Female | 82 | Ambulatory   | Pharyngeal swab                    |
| 1CoV-19/Mexico/TAM_LANGEBIO_IMSS_0122/2021EPI_ISL_1351764 | 04/03/21 | North America / Mexico / State of Mexico | Human | Female | 50 | Hospitalized | Nasopharyngeal swab                |
| 1CoV-19/Mexico/TAM_LANGEBIO_IMSS_0124/2021EPI_ISL_1351770 | 04/03/21 | North America / Mexico / Mexico City     | Human | Male   | 49 | Ambulatory   | Pharyngeal swab                    |
| 1CoV-19/Mexico/TAM_LANGEBIO_IMSS_0125/2021EPI_ISL_1351774 | 05/03/21 | North America / Mexico / Mexico City     | Human | Female | 47 | Hospitalized | Pharyngeal swab                    |
| 1CoV-19/Mexico/TAM_LANGEBIO_IMSS_0126/2021EPI_ISL_1351777 | 04/03/21 | North America / Mexico / State of Mexico | Human | Female | 19 | Hospitalized | Pharyngeal and Nasopharyngeal swab |
| 1CoV-19/Mexico/TAM_LANGEBIO_IMSS_0127/2021EPI_ISL_1351780 | 05/03/21 | North America / Mexico / Mexico City     | Human | Female | 24 | Ambulatory   | Pharyngeal and Nasopharyngeal swab |
| 1CoV-19/Mexico/TAM_LANGEBIO_IMSS_0129/2021EPI_ISL_1351787 | 02/03/21 | North America / Mexico / Veracruz        | Human | Female | 26 | Ambulatory   | Nasopharyngeal swab                |
| 1CoV-19/Mexico/TAM_LANGEBIO_IMSS_0130/2021EPI_ISL_1351790 | 04/03/21 | North America / Mexico / State of Mexico | Human | Female | 49 | Hospitalized | Pharyngeal and Nasopharyngeal swab |
| 1CoV-19/Mexico/TAM_LANGEBIO_IMSS_0132/2021EPI_ISL_1351796 | 04/03/21 | North America / Mexico / State of Mexico | Human | Female | 49 | Ambulatory   | Pharyngeal swab                    |
| 1CoV-19/Mexico/TAM_LANGEBIO_IMSS_0133/2021EPI_ISL_1351799 | 04/03/21 | North America / Mexico / Puebla          | Human | Male   | 17 | Ambulatory   | Pharyngeal and Nasopharyngeal swab |
| 1CoV-19/Mexico/TAM_LANGEBIO_IMSS_0134/2021EPI_ISL_1351802 | 04/03/21 | North America / Mexico / Puebla          | Human | Male   | 65 | Ambulatory   | Pharyngeal and Nasopharyngeal swab |
| 1CoV-19/Mexico/TAM_LANGEBIO_IMSS_0135/2021EPI_ISL_1351805 | 03/03/21 | North America / Mexico / Puebla          | Human | Female | 33 | Ambulatory   | Pharyngeal and Nasopharyngeal swab |
| 1CoV-19/Mexico/TAM_LANGEBIO_IMSS_0136/2021EPI_ISL_1351809 | 04/03/21 | North America / Mexico / Puebla          | Human | Male   | 24 | Ambulatory   | Pharyngeal and Nasopharyngeal swab |
| 1CoV-19/Mexico/TAM_LANGEBIO_IMSS_0137/2021EPI_ISL_1351810 | 04/03/21 | North America / Mexico / Puebla          | Human | Female | 33 | Ambulatory   | Pharyngeal and Nasopharyngeal swab |
| 1CoV-19/Mexico/TAM_LANGEBIO_IMSS_0138/2021EPI_ISL_1351811 | 03/03/21 | North America / Mexico / Puebla          | Human | Male   | 29 | Ambulatory   | Nasopharyngeal swab                |
| 1CoV-19/Mexico/TAM_LANGEBIO_IMSS_0139/2021EPI_ISL_1351815 | 04/03/21 | North America / Mexico / Puebla          | Human | Female | 52 | Ambulatory   | Pharyngeal and Nasopharyngeal swab |
| 1CoV-19/Mexico/TAM_LANGEBIO_IMSS_0140/2021EPI_ISL_1351818 | 04/03/21 | North America / Mexico / Puebla          | Human | Male   | 34 | Ambulatory   | Pharyngeal and Nasopharyngeal swab |
| 1CoV-19/Mexico/TAM_LANGEBIO_IMSS_0141/2021EPI_ISL_1351821 | 04/03/21 | North America / Mexico / Puebla          | Human | Female | 46 | Ambulatory   | Pharyngeal and Nasopharyngeal swab |
| 1CoV-19/Mexico/TAM_LANGEBIO_IMSS_0143/2021EPI_ISL_1351827 | 03/03/21 | North America / Mexico / Puebla          | Human | Male   | 43 | Ambulatory   | Pharyngeal and Nasopharyngeal swab |
| 1CoV-19/Mexico/TAM_LANGEBIO_IMSS_0144/2021EPI_ISL_1351830 | 03/03/21 | North America / Mexico / Puebla          | Human | Male   | 35 | Ambulatory   | Pharyngeal and Nasopharyngeal swab |
| 1CoV-19/Mexico/TAM_LANGEBIO_IMSS_0145/2021EPI_ISL_1351833 | 02/03/21 | North America / Mexico / Puebla          | Human | Female | 63 | Ambulatory   | Pharyngeal and Nasopharyngeal swab |
| 1CoV-19/Mexico/TAM_LANGEBIO_IMSS_0146/2021EPI_ISL_1351836 | 03/03/21 | North America / Mexico / Puebla          | Human | Male   | 15 | Ambulatory   | Pharyngeal and Nasopharyngeal swab |
| 1CoV-19/Mexico/TAM_LANGEBIO_IMSS_0147/2021EPI_ISL_1351839 | 02/03/21 | North America / Mexico / Puebla          | Human | Male   | 71 | Hospitalized | Pharyngeal and Nasopharyngeal swab |
| 1CoV-19/Mexico/TAM_LANGEBIO_IMSS_0148/2021EPI_ISL_1351842 | 03/03/21 | North America / Mexico / Puebla          | Human | Female | 70 | Ambulatory   | Pharyngeal and Nasopharyngeal swab |
| 1CoV-19/Mexico/TAM_LANGEBIO_IMSS_0149/2021EPI_ISL_1351845 | 02/03/21 | North America / Mexico / Puebla          | Human | Female | 53 | Hospitalized | Pharyngeal and Nasopharyngeal swab |

|                                                           |          |                                              |       |        |    |              |                                    |
|-----------------------------------------------------------|----------|----------------------------------------------|-------|--------|----|--------------|------------------------------------|
| 1CoV-19/Mexico/TAM_LANGEBIO_IMSS_0150/2021EPI_ISL_1351848 | 03/03/21 | North America / Mexico / Puebla              | Human | Female | 47 | Hospitalized | Pharyngeal and Nasopharyngeal swab |
| 1CoV-19/Mexico/TAM_LANGEBIO_IMSS_0151/2021EPI_ISL_1351851 | 03/03/21 | North America / Mexico / Puebla              | Human | Male   | 62 | Hospitalized | Pharyngeal and Nasopharyngeal swab |
| 1CoV-19/Mexico/TAM_LANGEBIO_IMSS_0152/2021EPI_ISL_1351854 | 03/03/21 | North America / Mexico / Puebla              | Human | Male   | 48 | Ambulatory   | Pharyngeal and Nasopharyngeal swab |
| 1CoV-19/Mexico/TAM_LANGEBIO_IMSS_0153/2021EPI_ISL_1351857 | 03/03/21 | North America / Mexico / Puebla              | Human | Female | 54 | Ambulatory   | Pharyngeal and Nasopharyngeal swab |
| 1CoV-19/Mexico/TAM_LANGEBIO_IMSS_0154/2021EPI_ISL_1351860 | 03/03/21 | North America / Mexico / Puebla              | Human | Female | 26 | Ambulatory   | Pharyngeal and Nasopharyngeal swab |
| 1CoV-19/Mexico/TAM_LANGEBIO_IMSS_0155/2021EPI_ISL_1351863 | 04/03/21 | North America / Mexico / Puebla              | Human | Female | 47 | Ambulatory   | Pharyngeal and Nasopharyngeal swab |
| 1CoV-19/Mexico/TAM_LANGEBIO_IMSS_0156/2021EPI_ISL_1351866 | 04/03/21 | North America / Mexico / Puebla              | Human | Male   | 72 | Hospitalized | Pharyngeal and Nasopharyngeal swab |
| 1CoV-19/Mexico/TAM_LANGEBIO_IMSS_0158/2021EPI_ISL_1351872 | 01/03/21 | North America / Mexico / Puebla              | Human | Female | 18 | Ambulatory   | Pharyngeal and Nasopharyngeal swab |
| 1CoV-19/Mexico/TAM_LANGEBIO_IMSS_0159/2021EPI_ISL_1351875 | 05/03/21 | North America / Mexico / Tlaxcala            | Human | Female | 73 | Ambulatory   | Pharyngeal and Nasopharyngeal swab |
| 1CoV-19/Mexico/TAM_LANGEBIO_IMSS_0160/2021EPI_ISL_1351878 | 04/03/21 | North America / Mexico / Tlaxcala            | Human | Male   | 56 | Hospitalized | Pharyngeal and Nasopharyngeal swab |
| 1CoV-19/Mexico/TAM_LANGEBIO_IMSS_0161/2021EPI_ISL_1351880 | 04/03/21 | North America / Mexico / Tlaxcala            | Human | Male   | 78 | Ambulatory   | Pharyngeal and Nasopharyngeal swab |
| 1CoV-19/Mexico/TAM_LANGEBIO_IMSS_0162/2021EPI_ISL_1351883 | 03/03/21 | North America / Mexico / Tlaxcala            | Human | Male   | 43 | Hospitalized | Pharyngeal and Nasopharyngeal swab |
| 1CoV-19/Mexico/TAM_LANGEBIO_IMSS_0163/2021EPI_ISL_1351886 | 03/03/21 | North America / Mexico / Tlaxcala            | Human | Male   | 71 | Hospitalized | Pharyngeal and Nasopharyngeal swab |
| 1CoV-19/Mexico/TAM_LANGEBIO_IMSS_0164/2021EPI_ISL_1351890 | 03/03/21 | North America / Mexico / Veracruz            | Human | Male   | 54 | Hospitalized | Pharyngeal and Nasopharyngeal swab |
| 1CoV-19/Mexico/TAM_LANGEBIO_IMSS_0167/2021EPI_ISL_1351899 | 02/03/21 | North America / Mexico / Veracruz            | Human | Female | 70 | Hospitalized | Pharyngeal and Nasopharyngeal swab |
| 1CoV-19/Mexico/TAM_LANGEBIO_IMSS_0168/2021EPI_ISL_1351902 | 03/03/21 | North America / Mexico / Oaxaca              | Human | Female | 77 | Hospitalized | Pharyngeal and Nasopharyngeal swab |
| 1CoV-19/Mexico/TAM_LANGEBIO_IMSS_0169/2021EPI_ISL_1351905 | 03/03/21 | North America / Mexico / Aguascalientes      | Human | Male   | 45 | Ambulatory   | Pharyngeal and Nasopharyngeal swab |
| 1CoV-19/Mexico/TAM_LANGEBIO_IMSS_0170/2021EPI_ISL_1351908 | 01/03/21 | North America / Mexico / Morelos             | Human | Male   | 76 | Hospitalized | Pharyngeal and Nasopharyngeal swab |
| 1CoV-19/Mexico/TAM_LANGEBIO_IMSS_0172/2021EPI_ISL_1351914 | 02/03/21 | North America / Mexico / Morelos             | Human | Female | 45 | Hospitalized | Pharyngeal and Nasopharyngeal swab |
| 1CoV-19/Mexico/TAM_LANGEBIO_IMSS_0175/2021EPI_ISL_1351924 | 03/03/21 | North America / Mexico / Veracruz            | Human | Female | 68 | Hospitalized | Pharyngeal and Nasopharyngeal swab |
| 1CoV-19/Mexico/TAM_LANGEBIO_IMSS_0176/2021EPI_ISL_1351927 | 04/03/21 | North America / Mexico / Veracruz            | Human | Female | 57 | Ambulatory   | Pharyngeal and Nasopharyngeal swab |
| 1CoV-19/Mexico/TAM_LANGEBIO_IMSS_0177/2021EPI_ISL_1351930 | 03/03/21 | North America / Mexico / Morelos             | Human | Male   | 64 | Hospitalized | Pharyngeal and Nasopharyngeal swab |
| 1CoV-19/Mexico/TAM_LANGEBIO_IMSS_0178/2021EPI_ISL_1351931 | 02/03/21 | North America / Mexico / Morelos             | Human | Male   | 55 | Hospitalized | Pharyngeal and Nasopharyngeal swab |
| 1CoV-19/Mexico/TAM_LANGEBIO_IMSS_0180/2021EPI_ISL_1351935 | 03/03/21 | North America / Mexico / Guerrero            | Human | Male   | 79 | Hospitalized | Pharyngeal and Nasopharyngeal swab |
| 1CoV-19/Mexico/TAM_LANGEBIO_IMSS_0182/2021EPI_ISL_1351941 | 05/03/21 | North America / Mexico / State of Mexico     | Human | Female | 55 | Hospitalized | Pharyngeal and Nasopharyngeal swab |
| 1CoV-19/Mexico/TAM_LANGEBIO_IMSS_0183/2021EPI_ISL_1351944 | 05/03/21 | North America / Mexico / State of Mexico     | Human | Female | 53 | Hospitalized | Pharyngeal and Nasopharyngeal swab |
| 1CoV-19/Mexico/TAM_LANGEBIO_IMSS_0184/2021EPI_ISL_1351947 | 05/03/21 | North America / Mexico / State of Mexico     | Human | Female | 50 | Hospitalized | Pharyngeal and Nasopharyngeal swab |
| 1CoV-19/Mexico/TAM_LANGEBIO_IMSS_0185/2021EPI_ISL_1351950 | 05/03/21 | North America / Mexico / State of Mexico     | Human | Male   | 21 | Hospitalized | Pharyngeal and Nasopharyngeal swab |
| 1CoV-19/Mexico/TAM_LANGEBIO_IMSS_0187/2021EPI_ISL_1351952 | 04/03/21 | North America / Mexico / Oaxaca              | Human | Female | 66 | Hospitalized | Pharyngeal and Nasopharyngeal swab |
| 1CoV-19/Mexico/TAM_LANGEBIO_IMSS_0188/2021EPI_ISL_1351954 | 05/03/21 | North America / Mexico / State of Mexico     | Human | Female | 43 | Ambulatory   | Pharyngeal and Nasopharyngeal swab |
| 1CoV-19/Mexico/TAM_LANGEBIO_IMSS_0189/2021EPI_ISL_1351956 | 03/03/21 | North America / Mexico / San Luis Potosi     | Human | Male   | 61 | Hospitalized | Pharyngeal and Nasopharyngeal swab |
| 1CoV-19/Mexico/TAM_LANGEBIO_IMSS_0190/2021EPI_ISL_1351958 | 06/03/21 | North America / Mexico / Mexico City         | Human | Female | 56 | Hospitalized | Pharyngeal and Nasopharyngeal swab |
| 1CoV-19/Mexico/TAM_LANGEBIO_IMSS_0191/2021EPI_ISL_1351960 | 04/03/21 | North America / Mexico / Mexico City         | Human | Female | 51 | Ambulatory   | Nasopharyngeal swab                |
| 1CoV-19/Mexico/TAM_LANGEBIO_IMSS_0192/2021EPI_ISL_1351963 | 05/03/21 | North America / Mexico / Mexico City         | Human | Male   | 41 | Hospitalized | Pharyngeal swab                    |
| 1CoV-19/Mexico/TAM_LANGEBIO_IMSS_0193/2021EPI_ISL_1351966 | 06/03/21 | North America / Mexico / Mexico City         | Human | Female | 93 | Ambulatory   | Pharyngeal swab                    |
| 1CoV-19/Mexico/TAM_LANGEBIO_IMSS_0194/2021EPI_ISL_1351969 | 05/03/21 | North America / Mexico / Mexico City         | Human | Male   | 57 | Ambulatory   | Pharyngeal swab                    |
| 1CoV-19/Mexico/TAM_LANGEBIO_IMSS_0195/2021EPI_ISL_1351972 | 05/03/21 | North America / Mexico / State of Mexico     | Human | Male   | 66 | Hospitalized | Pharyngeal and Nasopharyngeal swab |
| 1CoV-19/Mexico/TAM_LANGEBIO_IMSS_0196/2021EPI_ISL_1351975 | 02/03/21 | North America / Mexico / Veracruz            | Human | Male   | 24 | Ambulatory   | Nasopharyngeal swab                |
| 1CoV-19/Mexico/TAM_LANGEBIO_IMSS_0198/2021EPI_ISL_1351981 | 05/03/21 | North America / Mexico / Baja California Sur | Human | Male   | 23 | Ambulatory   | Pharyngeal and Nasopharyngeal swab |
| 1CoV-19/Mexico/TAM_LANGEBIO_IMSS_0199/2021EPI_ISL_1351984 | 05/03/21 | North America / Mexico / Baja California Sur | Human | Male   | 20 | Ambulatory   | Pharyngeal and Nasopharyngeal swab |
| 1CoV-19/Mexico/TAM_LANGEBIO_IMSS_0200/2021EPI_ISL_1351987 | 05/03/21 | North America / Mexico / Baja California Sur | Human | Male   | 39 | Ambulatory   | Pharyngeal and Nasopharyngeal swab |
| 1CoV-19/Mexico/TAM_LANGEBIO_IMSS_0201/2021EPI_ISL_1351990 | 05/03/21 | North America / Mexico / Baja California Sur | Human | Male   | 29 | Ambulatory   | Pharyngeal and Nasopharyngeal swab |
| 1CoV-19/Mexico/TAM_LANGEBIO_IMSS_0202/2021EPI_ISL_1351993 | 04/03/21 | North America / Mexico / Veracruz            | Human | Male   | 60 | Ambulatory   | Pharyngeal and Nasopharyngeal swab |
| 1CoV-19/Mexico/TAM_LANGEBIO_IMSS_0203/2021EPI_ISL_1351997 | 04/03/21 | North America / Mexico / Veracruz            | Human | Female | 34 | Ambulatory   | Pharyngeal and Nasopharyngeal swab |

|                                                           |          |                                              |       |        |    |              |                                    |
|-----------------------------------------------------------|----------|----------------------------------------------|-------|--------|----|--------------|------------------------------------|
| 1CoV-19/Mexico/TAM_LANGEBIO_IMSS_0204/2021EPI_ISL_1352000 | 04/03/21 | North America / Mexico / Veracruz            | Human | Male   | 61 | Ambulatory   | Pharyngeal and Nasopharyngeal swab |
| 1CoV-19/Mexico/TAM_LANGEBIO_IMSS_0206/2021EPI_ISL_1352006 | 05/03/21 | North America / Mexico / Morelos             | Human | Female | 61 | Hospitalized | Pharyngeal and Nasopharyngeal swab |
| 1CoV-19/Mexico/TAM_LANGEBIO_IMSS_0207/2021EPI_ISL_1352009 | 04/03/21 | North America / Mexico / Aguascalientes      | Human | Female | 25 | Ambulatory   | Pharyngeal and Nasopharyngeal swab |
| 1CoV-19/Mexico/TAM_LANGEBIO_IMSS_0208/2021EPI_ISL_1352012 | 04/03/21 | North America / Mexico / Aguascalientes      | Human | Female | 26 | Ambulatory   | Pharyngeal and Nasopharyngeal swab |
| 1CoV-19/Mexico/TAM_LANGEBIO_IMSS_0209/2021EPI_ISL_1352015 | 05/03/21 | North America / Mexico / Queretaro           | Human | Male   | 69 | Hospitalized | Pharyngeal and Nasopharyngeal swab |
| 1CoV-19/Mexico/TAM_LANGEBIO_IMSS_0210/2021EPI_ISL_1352018 | 05/03/21 | North America / Mexico / Queretaro           | Human | Male   | 43 | Hospitalized | Pharyngeal and Nasopharyngeal swab |
| 1CoV-19/Mexico/TAM_LANGEBIO_IMSS_0211/2021EPI_ISL_1352020 | 05/03/21 | North America / Mexico / Queretaro           | Human | Male   | 42 | Hospitalized | Pharyngeal and Nasopharyngeal swab |
| 1CoV-19/Mexico/TAM_LANGEBIO_IMSS_0212/2021EPI_ISL_1352023 | 06/03/21 | North America / Mexico / State of Mexico     | Human | Female | 56 | Hospitalized | Nasopharyngeal swab                |
| 1CoV-19/Mexico/TAM_LANGEBIO_IMSS_0213/2021EPI_ISL_1352026 | 07/03/21 | North America / Mexico / Mexico City         | Human | Male   | 69 | Hospitalized | Nasopharyngeal swab                |
| 1CoV-19/Mexico/TAM_LANGEBIO_IMSS_0214/2021EPI_ISL_1352029 | 07/03/21 | North America / Mexico / Mexico City         | Human | Female | 76 | Hospitalized | Nasopharyngeal swab                |
| 1CoV-19/Mexico/TAM_LANGEBIO_IMSS_0217/2021EPI_ISL_1352035 | 05/03/21 | North America / Mexico / San Luis Potosi     | Human | Male   | 63 | Hospitalized | Pharyngeal and Nasopharyngeal swab |
| 1CoV-19/Mexico/TAM_LANGEBIO_IMSS_0218/2021EPI_ISL_1352038 | 06/03/21 | North America / Mexico / Hidalgo             | Human | Female | 67 | Hospitalized | Pharyngeal and Nasopharyngeal swab |
| 1CoV-19/Mexico/TAM_LANGEBIO_IMSS_0219/2021EPI_ISL_1352041 | 05/03/21 | North America / Mexico / State of Mexico     | Human | Male   | 65 | Hospitalized | Pharyngeal and Nasopharyngeal swab |
| 1CoV-19/Mexico/TAM_LANGEBIO_IMSS_0220/2021EPI_ISL_1352043 | 05/03/21 | North America / Mexico / Mexico City         | Human | Female | 49 | Hospitalized | Pharyngeal swab                    |
| 1CoV-19/Mexico/TAM_LANGEBIO_IMSS_0221/2021EPI_ISL_1352047 | 06/03/21 | North America / Mexico / Mexico City         | Human | Female | 74 | Hospitalized | Pharyngeal swab                    |
| 1CoV-19/Mexico/TAM_LANGEBIO_IMSS_0222/2021EPI_ISL_1352048 | 05/03/21 | North America / Mexico / Baja California Sur | Human | Male   | 49 | Hospitalized | Pharyngeal and Nasopharyngeal swab |
| 1CoV-19/Mexico/TAM_LANGEBIO_IMSS_0223/2021EPI_ISL_1352050 | 08/03/21 | North America / Mexico / Puebla              | Human | Male   | 63 | Hospitalized | Pharyngeal and Nasopharyngeal swab |
| 1CoV-19/Mexico/TAM_LANGEBIO_IMSS_0224/2021EPI_ISL_1352051 | 06/03/21 | North America / Mexico / Mexico City         | Human | Female | 69 | Hospitalized | Pharyngeal and Nasopharyngeal swab |
| 1CoV-19/Mexico/TAM_LANGEBIO_IMSS_0225/2021EPI_ISL_1352053 | 06/03/21 | North America / Mexico / Mexico City         | Human | Male   | 59 | Ambulatory   | Pharyngeal and Nasopharyngeal swab |
| 1CoV-19/Mexico/TAM_LANGEBIO_IMSS_0226/2021EPI_ISL_1352055 | 08/03/21 | North America / Mexico / Mexico City         | Human | Female | 71 | Hospitalized | Nasopharyngeal swab                |
| 1CoV-19/Mexico/TAM_LANGEBIO_IMSS_0227/2021EPI_ISL_1352057 | 07/03/21 | North America / Mexico / Mexico City         | Human | Male   | 42 | Hospitalized | Pharyngeal and Nasopharyngeal swab |
| 1CoV-19/Mexico/TAM_LANGEBIO_IMSS_0228/2021EPI_ISL_1352059 | 07/03/21 | North America / Mexico / Mexico City         | Human | Female | 83 | Hospitalized | Pharyngeal and Nasopharyngeal swab |
| 1CoV-19/Mexico/TAM_LANGEBIO_IMSS_0229/2021EPI_ISL_1352060 | 08/03/21 | North America / Mexico / Mexico City         | Human | Female | 91 | Hospitalized | Pharyngeal and Nasopharyngeal swab |
| 1CoV-19/Mexico/TAM_LANGEBIO_IMSS_0230/2021EPI_ISL_1352062 | 03/03/21 | North America / Mexico / Veracruz            | Human | Male   | 73 | Hospitalized | Pharyngeal and Nasopharyngeal swab |
| 1CoV-19/Mexico/TAM_LANGEBIO_IMSS_0231/2021EPI_ISL_1352066 | 04/03/21 | North America / Mexico / Veracruz            | Human | Female | 46 | Ambulatory   | Pharyngeal and Nasopharyngeal swab |
| 1CoV-19/Mexico/TAM_LANGEBIO_IMSS_0232/2021EPI_ISL_1352068 | 06/03/21 | North America / Mexico / Morelos             | Human | Male   | 57 | Ambulatory   | Pharyngeal and Nasopharyngeal swab |
| 1CoV-19/Mexico/TAM_LANGEBIO_IMSS_0233/2021EPI_ISL_1352070 | 04/03/21 | North America / Mexico / San Luis Potosi     | Human | Male   | 71 | Hospitalized | Pharyngeal and Nasopharyngeal swab |
| 1CoV-19/Mexico/TAM_LANGEBIO_IMSS_0234/2021EPI_ISL_1352072 | 04/03/21 | North America / Mexico / San Luis Potosi     | Human | Male   | 76 | Hospitalized | Pharyngeal and Nasopharyngeal swab |
| 1CoV-19/Mexico/TAM_LANGEBIO_IMSS_0235/2021EPI_ISL_1352076 | 07/03/21 | North America / Mexico / Zacatecas           | Human | Male   | 20 | Ambulatory   | Pharyngeal and Nasopharyngeal swab |
| 1CoV-19/Mexico/TAM_LANGEBIO_IMSS_0236/2021EPI_ISL_1352079 | 05/03/21 | North America / Mexico / Zacatecas           | Human | Female | 79 | Ambulatory   | Pharyngeal and Nasopharyngeal swab |
| 1CoV-19/Mexico/TAM_LANGEBIO_IMSS_0237/2021EPI_ISL_1352083 | 06/03/21 | North America / Mexico / Zacatecas           | Human | Male   | 47 | Hospitalized | Pharyngeal and Nasopharyngeal swab |
| 1CoV-19/Mexico/TAM_LANGEBIO_IMSS_0238/2021EPI_ISL_1352085 | 05/03/21 | North America / Mexico / Zacatecas           | Human | Female | 46 | Ambulatory   | Pharyngeal and Nasopharyngeal swab |
| hCoV-19/Mexico/GUA-InDRE_F10376_S662/2021 EPI_ISL_1359077 | 15/02/21 | North America / Mexico / Guanajuato          | Human | Female | 20 | Released     | Oropharyngeal swab                 |
| hCoV-19/Mexico/GUA-InDRE_F10385_S667/2021 EPI_ISL_1359082 | 17/02/21 | North America / Mexico / Guanajuato          | Human | Female | 60 | Released     | Oropharyngeal swab                 |
| hCoV-19/Mexico/GUA-InDRE_F10392_S671/2021 EPI_ISL_1359086 | 18/02/21 | North America / Mexico / Guanajuato          | Human | Male   | 43 | Released     | Oropharyngeal swab                 |
| hCoV-19/Mexico/MOR-InDRE_F10613_S685/2021 EPI_ISL_1365650 | 16/02/21 | North America / Mexico / Morelos             | Human | Male   | 67 | Hospitalized | Pharyngeal and Nasopharyngeal swab |
| hCoV-19/Mexico/MOR-InDRE_F10663_S690/2021 EPI_ISL_1365655 | 19/02/21 | North America / Mexico / Morelos             | Human | Male   | 71 | Released     | Oropharyngeal swab                 |
| hCoV-19/Mexico/VER-InDRE_F10678_S691/2021 EPI_ISL_1365656 | 15/02/21 | North America / Mexico / Veracruz            | Human | Male   | 24 | Released     | Oropharyngeal swab                 |
| hCoV-19/Mexico/CMX-InDRE_F10682_S692/2021 EPI_ISL_1365657 | 16/02/21 | North America / Mexico / Mexico City         | Human | Male   | 74 | Deceased     | Oropharyngeal swab                 |
| hCoV-19/Mexico/NLE-InDRE_F10811_S709/2021 EPI_ISL_1365674 | 23/02/21 | North America / Mexico / Nuevo Leon          | Human | Male   | 37 | Released     | Oropharyngeal swab                 |
| hCoV-19/Mexico/PUE-InDRE_F10413_S711/2021 EPI_ISL_1366660 | 21/02/21 | North America / Mexico / Puebla              | Human | Female | 28 | Released     | Oropharyngeal swab                 |
| hCoV-19/Mexico/JAL-InDRE_F10432_S712/2021 EPI_ISL_1366661 | 16/02/21 | North America / Mexico / Jalisco             | Human | Male   | 78 | Released     | Oropharyngeal swab                 |
| hCoV-19/Mexico/JAL-InDRE_F10438_S713/2021 EPI_ISL_1366662 | 19/02/21 | North America / Mexico / Jalisco             | Human | Female | 26 | Released     | Oropharyngeal swab                 |
| hCoV-19/Mexico/NLE-InDRE_F10502_S714/2021 EPI_ISL_1366663 | 15/02/21 | North America / Mexico / Nuevo Leon          | Human | Male   | 41 | Hospitalized | Oropharyngeal swab                 |

|                                            |                 |          |                                          |       |        |    |              |                                  |
|--------------------------------------------|-----------------|----------|------------------------------------------|-------|--------|----|--------------|----------------------------------|
| hCoV-19/Mexico/NLE-InDRE_F10511_S715/2021  | EPI_ISL_1366664 | 17/02/21 | North America / Mexico / Nuevo Leon      | Human | Female | 54 | Released     | Oropharyngeal swab               |
| hCoV-19/Mexico/NLE-InDRE_F10523_S716/2021  | EPI_ISL_1366665 | 16/02/21 | North America / Mexico / Nuevo Leon      | Human | Male   | 69 | Released     | Oropharyngeal swab               |
| hCoV-19/Mexico/YUC-InDRE_F10540_S717/2021  | EPI_ISL_1366666 | 19/02/21 | North America / Mexico / Yucatan         | Human | Female | 74 | Released     | Oropharyngeal swab               |
| hCoV-19/Mexico/QUE-InDRE_F10573_S718/2021  | EPI_ISL_1366667 | 16/02/21 | North America / Mexico / Queretaro       | Human | Male   | 34 | Released     | Oropharyngeal swab               |
| hCoV-19/Mexico/QUE-InDRE_F10577_S719/2021  | EPI_ISL_1366668 | 16/02/21 | North America / Mexico / Queretaro       | Human | Male   | 50 | Released     | Oropharyngeal swab               |
| hCoV-19/Mexico/QUE-InDRE_F10583_S720/2021  | EPI_ISL_1366669 | 17/02/21 | North America / Mexico / Queretaro       | Human | Female | 27 | Released     | Oropharyngeal swab               |
| hCoV-19/Mexico/QUE-InDRE_F10598_S721/2021  | EPI_ISL_1366670 | 19/02/21 | North America / Mexico / Queretaro       | Human | Female | 56 | Released     | Oropharyngeal swab               |
| hCoV-19/Mexico/QUE-InDRE_F10599_S722/2021  | EPI_ISL_1366671 | 19/02/21 | North America / Mexico / Queretaro       | Human | Male   | 58 | Released     | Oropharyngeal swab               |
| hCoV-19/Mexico/QUE-InDRE_F10602_S723/2021  | EPI_ISL_1366672 | 20/02/21 | North America / Mexico / Queretaro       | Human | Male   | 38 | Released     | Oropharyngeal swab               |
| hCoV-19/Mexico/QUE-InDRE_F10603_S724/2021  | EPI_ISL_1366673 | 20/02/21 | North America / Mexico / Queretaro       | Human | Female | 49 | Released     | Oropharyngeal swab               |
| hCoV-19/Mexico/QUE-InDRE_F10607_S725/2021  | EPI_ISL_1366674 | 21/02/21 | North America / Mexico / Queretaro       | Human | Female | 29 | Released     | Oropharyngeal swab               |
| hCoV-19/Mexico/QUE-InDRE_F10608_S726/2021  | EPI_ISL_1366675 | 21/02/21 | North America / Mexico / Queretaro       | Human | Female | 36 | Hospitalized | Oropharyngeal swab               |
| hCoV-19/Mexico/QUE-InDRE_F10614_S727/2021  | EPI_ISL_1366676 | 23/02/21 | North America / Mexico / Queretaro       | Human | Male   | 34 | Released     | Oropharyngeal swab               |
| hCoV-19/Mexico/MOR-InDRE_F10626_S728/2021  | EPI_ISL_1366677 | 15/02/21 | North America / Mexico / Morelos         | Human | Female | 74 | Released     | Oropharyngeal swab               |
| hCoV-19/Mexico/MOR-InDRE_F10650_S729/2021  | EPI_ISL_1366678 | 17/02/21 | North America / Mexico / Morelos         | Human | Male   | 76 | Released     | Oropharyngeal swab               |
| hCoV-19/Mexico/MOR-InDRE_F10653_S730/2021  | EPI_ISL_1366679 | 18/02/21 | North America / Mexico / Morelos         | Human | Female | 28 | Released     | Oropharyngeal swab               |
| hCoV-19/Mexico/MOR-InDRE_F10656_S731/2021  | EPI_ISL_1366680 | 17/02/21 | North America / Mexico / Morelos         | Human | Male   | 83 | Hospitalized | Oropharyngeal swab               |
| hCoV-19/Mexico/MOR-InDRE_F10660_S732/2021  | EPI_ISL_1366681 | 19/02/21 | North America / Mexico / Morelos         | Human | Male   | 17 | Released     | Oropharyngeal swab               |
| hCoV-19/Mexico/VER-InDRE_F10672_S733/2021  | EPI_ISL_1366682 | 19/02/21 | North America / Mexico / Veracruz        | Human | Female | 75 | Hospitalized | Oropharyngeal swab               |
| hCoV-19/Mexico/VER-InDRE_F10673_S734/2021  | EPI_ISL_1366683 | 20/02/21 | North America / Mexico / Veracruz        | Human | Male   | 45 | Released     | Oropharyngeal swab               |
| hCoV-19/Mexico/VER-InDRE_F10674_S735/2021  | EPI_ISL_1366684 | 20/02/21 | North America / Mexico / Veracruz        | Human | Female | 70 | Hospitalized | Oropharyngeal swab               |
| hCoV-19/Mexico/VER-InDRE_F10679_S736/2021  | EPI_ISL_1366685 | 16/02/21 | North America / Mexico / Veracruz        | Human | Female | 77 | Released     | Oropharyngeal swab               |
| hCoV-19/Mexico/VER-InDRE_F10681_S737/2021  | EPI_ISL_1366686 | 21/02/21 | North America / Mexico / Veracruz        | Human | Female | 74 | Released     | Oropharyngeal swab               |
| hCoV-19/Mexico/CMX-InDRE_F10721_S738/2021  | EPI_ISL_1366687 | 15/02/21 | North America / Mexico / Mexico City     | Human | Male   | 34 | Released     | Oropharyngeal swab               |
| hCoV-19/Mexico/CMX-InDRE_F10724_S739/2021  | EPI_ISL_1366688 | 15/02/21 | North America / Mexico / Mexico City     | Human | Male   | 45 | Deceased     | Oropharyngeal swab               |
| hCoV-19/Mexico/CMX-InDRE_F10723_S740/2021  | EPI_ISL_1366689 | 16/02/21 | North America / Mexico / Mexico City     | Human | Female | 62 | Released     | Oropharyngeal swab               |
| hCoV-19/Mexico/HID-InDRE_F10781_S741/2021  | EPI_ISL_1366690 | 22/02/21 | North America / Mexico / Hidalgo         | Human | Female | 50 | Deceased     | Oropharyngeal swab               |
| hCoV-19/Mexico/HID-InDRE_F10786_S742/2021  | EPI_ISL_1366691 | 23/02/21 | North America / Mexico / Hidalgo         | Human | Female | 55 | Released     | Oropharyngeal swab               |
| hCoV-19/Mexico/HID-InDRE_F10789_S743/2021  | EPI_ISL_1366692 | 27/02/21 | North America / Mexico / Hidalgo         | Human | Male   | 47 | Released     | Oropharyngeal swab               |
| hCoV-19/Mexico/NLE-InDRE_F10792_S744/2021  | EPI_ISL_1366693 | 22/02/21 | North America / Mexico / Nuevo Leon      | Human | Male   | 51 | Released     | Oropharyngeal swab               |
| hCoV-19/Mexico/NLE-InDRE_F10793_S745/2021  | EPI_ISL_1366694 | 23/02/21 | North America / Mexico / Nuevo Leon      | Human | Female | 46 | Hospitalized | Oropharyngeal swab               |
| hCoV-19/Mexico/NLE-InDRE_F10794_S746/2021  | EPI_ISL_1366695 | 24/02/21 | North America / Mexico / Nuevo Leon      | Human | Female | 36 | Released     | Oropharyngeal swab               |
| hCoV-19/Mexico/NLE-InDRE_F10800_S747/2021  | EPI_ISL_1366696 | 23/02/21 | North America / Mexico / Nuevo Leon      | Human | Male   | 66 | Released     | Oropharyngeal swab               |
| hCoV-19/Mexico/NLE-InDRE_F10801_S748/2021  | EPI_ISL_1366697 | 22/02/21 | North America / Mexico / Nuevo Leon      | Human | Female | 60 | Deceased     | Oropharyngeal swab               |
| hCoV-19/Mexico/NLE-InDRE_F10807_S749/2021  | EPI_ISL_1366698 | 23/02/21 | North America / Mexico / Nuevo Leon      | Human | Male   | 52 | Released     | Oropharyngeal swab               |
| hCoV-19/Mexico/NLE-InDRE_F10809_S750/2021  | EPI_ISL_1366699 | 24/02/21 | North America / Mexico / Nuevo Leon      | Human | Female | 52 | Released     | Oropharyngeal swab               |
| hCoV-19/Mexico/GUA-InDRE_F10816_S751/2021  | EPI_ISL_1366700 | 22/02/21 | North America / Mexico / Guanajuato      | Human | Male   | 65 | Hospitalized | Oropharyngeal swab               |
| hCoV-19/Mexico/MEX_LANGEBIO_IMSS_0239/2021 | EPI_ISL_1381234 | 06/03/21 | North America / Mexico / State of Mexico | Human | Male   | 45 | Ambulatory   | Pharyngeal / Nasopharyngeal swab |
| hCoV-19/Mexico/CMX_LANGEBIO_IMSS_0240/2021 | EPI_ISL_1381235 | 05/03/21 | North America / Mexico / Mexico City     | Human | Male   | 78 | Hospitalized | Nasopharyngeal swab              |
| hCoV-19/Mexico/CMX_LANGEBIO_IMSS_0241/2021 | EPI_ISL_1381236 | 05/03/21 | North America / Mexico / Mexico City     | Human | Female | 67 | Hospitalized | Nasopharyngeal swab              |
| hCoV-19/Mexico/CMX_LANGEBIO_IMSS_0242/2021 | EPI_ISL_1381237 | 05/03/21 | North America / Mexico / Mexico City     | Human | Female | 61 | Hospitalized | Nasopharyngeal swab              |
| hCoV-19/Mexico/CMX_LANGEBIO_IMSS_0243/2021 | EPI_ISL_1381238 | 05/03/21 | North America / Mexico / Mexico City     | Human | Male   | 77 | Hospitalized | Nasopharyngeal swab              |
| hCoV-19/Mexico/CMX_LANGEBIO_IMSS_0244/2021 | EPI_ISL_1381239 | 05/03/21 | North America / Mexico / Mexico City     | Human | Male   | 39 | Ambulatory   | Pharyngeal swab                  |
| hCoV-19/Mexico/CMX_LANGEBIO_IMSS_0245/2021 | EPI_ISL_1381240 | 06/03/21 | North America / Mexico / Mexico City     | Human | Female | 76 | Hospitalized | Pharyngeal swab                  |

|                                                           |          |                                          |       |        |    |              |                                  |
|-----------------------------------------------------------|----------|------------------------------------------|-------|--------|----|--------------|----------------------------------|
| 1CoV-19/Mexico/MEX_LANGEBIO_IMSS_0246/2021EPI_ISL_1381241 | 07/03/21 | North America / Mexico / State of Mexico | Human | Female | 63 | Hospitalized | Pharyngeal / Nasopharyngeal swab |
| 1CoV-19/Mexico/MEX_LANGEBIO_IMSS_0247/2021EPI_ISL_1381242 | 07/03/21 | North America / Mexico / State of Mexico | Human | Male   | 77 | Hospitalized | Pharyngeal / Nasopharyngeal swab |
| 1CoV-19/Mexico/MEX_LANGEBIO_IMSS_0249/2021EPI_ISL_1381244 | 06/03/21 | North America / Mexico / State of Mexico | Human | Male   | 52 | Hospitalized | Pharyngeal / Nasopharyngeal swab |
| 1CoV-19/Mexico/CMX_LANGEBIO_IMSS_0250/2021EPI_ISL_1381245 | 07/03/21 | North America / Mexico / Mexico City     | Human | Male   | 78 | Hospitalized | Nasopharyngeal swab              |
| 1CoV-19/Mexico/CMX_LANGEBIO_IMSS_0251/2021EPI_ISL_1381246 | 07/03/21 | North America / Mexico / Mexico City     | Human | Male   | 59 | Ambulatory   | Pharyngeal swab                  |
| 1CoV-19/Mexico/MEX_LANGEBIO_IMSS_0252/2021EPI_ISL_1381247 | 04/03/21 | North America / Mexico / State of Mexico | Human | Male   | 57 | Ambulatory   | Pharyngeal swab                  |
| 1CoV-19/Mexico/ZAC_LANGEBIO_IMSS_0255/2021EPI_ISL_1381250 | 04/03/21 | North America / Mexico / Zacatecas       | Human | Male   | 57 | Ambulatory   | Pharyngeal / Nasopharyngeal swab |
| 1CoV-19/Mexico/ZAC_LANGEBIO_IMSS_0256/2021EPI_ISL_1381251 | 04/03/21 | North America / Mexico / Zacatecas       | Human | Male   | 65 | Ambulatory   | Pharyngeal / Nasopharyngeal swab |
| 1CoV-19/Mexico/ZAC_LANGEBIO_IMSS_0257/2021EPI_ISL_1381252 | 04/03/21 | North America / Mexico / Zacatecas       | Human | Female | 40 | Ambulatory   | Pharyngeal / Nasopharyngeal swab |
| 1CoV-19/Mexico/ZAC_LANGEBIO_IMSS_0259/2021EPI_ISL_1381254 | 04/03/21 | North America / Mexico / Zacatecas       | Human | Male   | 52 | Ambulatory   | Pharyngeal / Nasopharyngeal swab |
| 1CoV-19/Mexico/ZAC_LANGEBIO_IMSS_0260/2021EPI_ISL_1381255 | 03/03/21 | North America / Mexico / Zacatecas       | Human | Male   | 27 | Ambulatory   | Pharyngeal / Nasopharyngeal swab |
| 1CoV-19/Mexico/ZAC_LANGEBIO_IMSS_0263/2021EPI_ISL_1381258 | 02/03/21 | North America / Mexico / Zacatecas       | Human | Male   | 47 | Ambulatory   | Pharyngeal / Nasopharyngeal swab |
| hCoV-19/Mexico/CMX-INMEGEN-03-05-45/2021 EPI_ISL_1392922  | 01/03/21 | North America / Mexico / Mexico City     | Human | Female | 68 | unknown      |                                  |
| hCoV-19/Mexico/MIC-InDRE_F10346_S853/2021 EPI_ISL_1399259 | 17/02/21 | North America / Mexico / Michoacan       | Human | Male   | 65 | Hospitalized | Oropharyngeal swab               |
| hCoV-19/Mexico/GUA-InDRE_F10355_S856/2021 EPI_ISL_1399261 | 20/02/21 | North America / Mexico / Guanajuato      | Human | Female | 60 | Hospitalized | Oropharyngeal swab               |
| hCoV-19/Mexico/MOR-InDRE_F10908_S864/2021 EPI_ISL_1399269 | 21/02/21 | North America / Mexico / Morelos         | Human | Male   | 64 | Hospitalized | Oropharyngeal swab               |
| hCoV-19/Mexico/CMX-InDRE_F11121_S877/2021 EPI_ISL_1399281 | 26/02/21 | North America / Mexico / Mexico City     | Human | Male   | 68 | Released     | Oropharyngeal swab               |
| hCoV-19/Mexico/JAL-InDRE_F10948_S752/2021 EPI_ISL_1400298 | 21/02/21 | North America / Mexico / Jalisco         | Human | Female | 66 | Hospitalized | Oropharyngeal swab               |
| hCoV-19/Mexico/CAM-InDRE_F10946_S753/2021 EPI_ISL_1400299 | 26/02/21 | North America / Mexico / Campeche        | Human | Female | 54 | Hospitalized | Oropharyngeal swab               |
| hCoV-19/Mexico/MOR-InDRE_F10943_S754/2021 EPI_ISL_1400300 | 26/02/21 | North America / Mexico / Morelos         | Human | Male   | 71 | Released     | Oropharyngeal swab               |
| hCoV-19/Mexico/MOR-InDRE_F10935_S755/2021 EPI_ISL_1400301 | 24/02/21 | North America / Mexico / Morelos         | Human | Male   | 58 | Released     | Oropharyngeal swab               |
| hCoV-19/Mexico/MOR-InDRE_F10933_S756/2021 EPI_ISL_1400302 | 24/02/21 | North America / Mexico / Morelos         | Human | Male   | 63 | Hospitalized | Oropharyngeal swab               |
| hCoV-19/Mexico/MOR-InDRE_F10930_S757/2021 EPI_ISL_1400303 | 24/02/21 | North America / Mexico / Morelos         | Human | Male   | 67 | Hospitalized | Oropharyngeal swab               |
| hCoV-19/Mexico/GUA-InDRE_F10839_S758/2021 EPI_ISL_1400304 | 23/02/21 | North America / Mexico / Guanajuato      | Human | Female | 17 | Released     | Oropharyngeal swab               |
| hCoV-19/Mexico/MOR-InDRE_F10927_S759/2021 EPI_ISL_1400305 | 22/02/21 | North America / Mexico / Morelos         | Human | Male   | 46 | Hospitalized | Oropharyngeal swab               |
| hCoV-19/Mexico/MOR-InDRE_F10926_S760/2021 EPI_ISL_1400306 | 22/02/21 | North America / Mexico / Morelos         | Human | Female | 33 | Hospitalized | Oropharyngeal swab               |
| hCoV-19/Mexico/MOR-InDRE_F10923_S761/2021 EPI_ISL_1400307 | 23/02/21 | North America / Mexico / Morelos         | Human | Male   | 31 | Released     | Oropharyngeal swab               |
| hCoV-19/Mexico/MOR-InDRE_F10922_S762/2021 EPI_ISL_1400308 | 22/02/21 | North America / Mexico / Morelos         | Human | Male   | 45 | Hospitalized | Oropharyngeal swab               |
| hCoV-19/Mexico/MOR-InDRE_F10916_S763/2021 EPI_ISL_1400309 | 21/02/21 | North America / Mexico / Morelos         | Human | Female | 47 | Hospitalized | Oropharyngeal swab               |
| hCoV-19/Mexico/PUE-InDRE_F10903_S765/2021 EPI_ISL_1400310 | 19/02/21 | North America / Mexico / Puebla          | Human | Male   | 48 | Hospitalized | Oropharyngeal swab               |
| hCoV-19/Mexico/PUE-InDRE_F10895_S767/2021 EPI_ISL_1400312 | 22/02/21 | North America / Mexico / Puebla          | Human | Female | 86 | Deceased     | Oropharyngeal swab               |
| hCoV-19/Mexico/PUE-InDRE_F10894_S768/2021 EPI_ISL_1400313 | 22/02/21 | North America / Mexico / Puebla          | Human | Male   | 36 | Hospitalized | Oropharyngeal swab               |
| hCoV-19/Mexico/GUA-InDRE_F10882_S769/2021 EPI_ISL_1400314 | 27/02/21 | North America / Mexico / Guanajuato      | Human | Female | 27 | Released     | Oropharyngeal swab               |
| hCoV-19/Mexico/GUA-InDRE_F10878_S770/2021 EPI_ISL_1400315 | 25/02/21 | North America / Mexico / Guanajuato      | Human | Female | 58 | Released     | Oropharyngeal swab               |
| hCoV-19/Mexico/GUA-InDRE_F10876_S772/2021 EPI_ISL_1400317 | 25/02/21 | North America / Mexico / Guanajuato      | Human | Male   | 60 | Released     | Oropharyngeal swab               |
| hCoV-19/Mexico/GUA-InDRE_F10870_S773/2021 EPI_ISL_1400318 | 26/02/21 | North America / Mexico / Guanajuato      | Human | Female | 30 | Released     | Oropharyngeal swab               |
| hCoV-19/Mexico/GUA-InDRE_F10869_S774/2021 EPI_ISL_1400319 | 25/02/21 | North America / Mexico / Guanajuato      | Human | Female | 53 | Released     | Oropharyngeal swab               |
| hCoV-19/Mexico/GUA-InDRE_F10867_S775/2021 EPI_ISL_1400320 | 25/02/21 | North America / Mexico / Guanajuato      | Human | Female | 29 | Released     | Oropharyngeal swab               |
| hCoV-19/Mexico/GUA-InDRE_F10865_S776/2021 EPI_ISL_1400321 | 25/02/21 | North America / Mexico / Guanajuato      | Human | Male   | 33 | Released     | Oropharyngeal swab               |
| hCoV-19/Mexico/GUA-InDRE_F10864_S777/2021 EPI_ISL_1400322 | 25/02/21 | North America / Mexico / Guanajuato      | Human | Female | 60 | Released     | Oropharyngeal swab               |
| hCoV-19/Mexico/GUA-InDRE_F10863_S778/2021 EPI_ISL_1400323 | 25/02/21 | North America / Mexico / Guanajuato      | Human | Male   | 42 | Released     | Oropharyngeal swab               |
| hCoV-19/Mexico/GUA-InDRE_F10860_S779/2021 EPI_ISL_1400324 | 25/02/21 | North America / Mexico / Guanajuato      | Human | Female | 61 | Released     | Oropharyngeal swab               |
| hCoV-19/Mexico/GUA-InDRE_F10854_S783/2021 EPI_ISL_1400328 | 22/02/21 | North America / Mexico / Guanajuato      | Human | Female | 57 | Released     | Oropharyngeal swab               |
| hCoV-19/Mexico/GUA-InDRE_F10848_S784/2021 EPI_ISL_1400329 | 23/02/21 | North America / Mexico / Guanajuato      | Human | Male   | 33 | Released     | Oropharyngeal swab               |



|                                           |                 |          |                                      |       |        |    |              |                    |
|-------------------------------------------|-----------------|----------|--------------------------------------|-------|--------|----|--------------|--------------------|
| hCoV-19/Mexico/GUA-InDRE_F10847_S785/2021 | EPI_ISL_1400330 | 27/02/21 | North America / Mexico / Guanajuato  | Human | Female | 57 | Released     | Oropharyngeal swab |
| hCoV-19/Mexico/GUA-InDRE_F10846_S786/2021 | EPI_ISL_1400331 | 22/02/21 | North America / Mexico / Guanajuato  | Human | Female | 60 | Released     | Oropharyngeal swab |
| hCoV-19/Mexico/GUA-InDRE_F10843_S788/2021 | EPI_ISL_1400333 | 24/02/21 | North America / Mexico / Guanajuato  | Human | Female | 31 | Released     | Oropharyngeal swab |
| hCoV-19/Mexico/GUA-InDRE_F10842_S789/2021 | EPI_ISL_1400334 | 24/02/21 | North America / Mexico / Guanajuato  | Human | Male   | 11 | Released     | Oropharyngeal swab |
| hCoV-19/Mexico/GUA-InDRE_F10841_S790/2021 | EPI_ISL_1400335 | 23/02/21 | North America / Mexico / Guanajuato  | Human | Female | 49 | Released     | Oropharyngeal swab |
| hCoV-19/Mexico/GUA-InDRE_F10840_S791/2021 | EPI_ISL_1400336 | 23/02/21 | North America / Mexico / Guanajuato  | Human | Male   | 46 | Released     | Oropharyngeal swab |
| hCoV-19/Mexico/GUA-InDRE_F10837_S792/2021 | EPI_ISL_1400337 | 23/02/21 | North America / Mexico / Guanajuato  | Human | Female | 18 | Released     | Oropharyngeal swab |
| hCoV-19/Mexico/GUA-InDRE_F10835_S793/2021 | EPI_ISL_1400338 | 22/02/21 | North America / Mexico / Guanajuato  | Human | Female | 53 | Released     | Oropharyngeal swab |
| hCoV-19/Mexico/GUA-InDRE_F10834_S794/2021 | EPI_ISL_1400339 | 22/02/21 | North America / Mexico / Guanajuato  | Human | Female | 70 | Released     | Oropharyngeal swab |
| hCoV-19/Mexico/GUA-InDRE_F10829_S796/2021 | EPI_ISL_1400341 | 27/02/21 | North America / Mexico / Guanajuato  | Human | Female | 66 | Hospitalized | Oropharyngeal swab |
| hCoV-19/Mexico/GUA-InDRE_F10827_S797/2021 | EPI_ISL_1400342 | 25/02/21 | North America / Mexico / Guanajuato  | Human | Male   | 71 | Hospitalized | Oropharyngeal swab |
| hCoV-19/Mexico/GUA-InDRE_F10825_S798/2021 | EPI_ISL_1400343 | 25/02/21 | North America / Mexico / Guanajuato  | Human | Female | 87 | Deceased     | Oropharyngeal swab |
| hCoV-19/Mexico/GUA-InDRE_F10824_S799/2021 | EPI_ISL_1400344 | 25/02/21 | North America / Mexico / Guanajuato  | Human | Female | 55 | Deceased     | Oropharyngeal swab |
| hCoV-19/Mexico/GUA-InDRE_F10823_S800/2021 | EPI_ISL_1400345 | 25/02/21 | North America / Mexico / Guanajuato  | Human | Male   | 69 | Hospitalized | Oropharyngeal swab |
| hCoV-19/Mexico/GUA-InDRE_F10821_S801/2021 | EPI_ISL_1400346 | 23/02/21 | North America / Mexico / Guanajuato  | Human | Female | 59 | Hospitalized | Oropharyngeal swab |
| hCoV-19/Mexico/GUA-InDRE_F10820_S802/2021 | EPI_ISL_1400347 | 24/02/21 | North America / Mexico / Guanajuato  | Human | Male   | 78 | Hospitalized | Oropharyngeal swab |
| hCoV-19/Mexico/CMX-INMEGEN-03-08-07/2021  | EPI_ISL_1400795 | 01/03/21 | North America / Mexico / Mexico City | Human | Female | 49 | unknown      | Oropharyngeal swab |
| hCoV-19/Mexico/CMX-INMEGEN-03-08-32/2021  | EPI_ISL_1400796 | 03/03/21 | North America / Mexico / Mexico City | Human | Male   | 41 | unknown      | Oropharyngeal swab |
| hCoV-19/Mexico/CMX-INMEGEN-03-08-36/2021  | EPI_ISL_1400797 | 03/03/21 | North America / Mexico / Mexico City | Human | Male   | 34 | unknown      | Oropharyngeal swab |
| hCoV-19/Mexico/CMX-INMEGEN-03-08-66/2021  | EPI_ISL_1400798 | 05/03/21 | North America / Mexico / Mexico City | Human | Female | 47 | unknown      | Oropharyngeal swab |
| hCoV-19/Mexico/CMX-INMEGEN-03-08-93/2021  | EPI_ISL_1400799 | 05/03/21 | North America / Mexico / Mexico City | Human | Female | 34 | unknown      | Oropharyngeal swab |
| hCoV-19/Mexico/MOR-InDRE_F10942_S882/2021 | EPI_ISL_1405899 | 25/02/21 | North America / Mexico / Morelos     | Human | Female | 83 | Hospitalized | Oropharyngeal swab |
| hCoV-19/Mexico/GUA-InDRE_F10866_S887/2021 | EPI_ISL_1405904 | 25/02/21 | North America / Mexico / Guanajuato  | Human | Male   | 20 | Released     | Oropharyngeal swab |
| hCoV-19/Mexico/JAL-InDRE_F10958_S880/2021 | EPI_ISL_1405911 | 24/02/21 | North America / Mexico / Jalisco     | Human | Female | 64 | Released     | Oropharyngeal swab |
| hCoV-19/Mexico/CMX-INMEGEN-03-09-29/2021  | EPI_ISL_1406083 | 11/03/21 | North America / Mexico / Mexico City | Human | Male   | 21 | unknown      | Oropharyngeal swab |
| hCoV-19/Mexico/CMX-INMEGEN-03-09-30/2021  | EPI_ISL_1406084 | 11/03/21 | North America / Mexico / Mexico City | Human | Male   | 43 | unknown      | Oropharyngeal swab |
| hCoV-19/Mexico/CMX-INMEGEN-03-09-31/2021  | EPI_ISL_1406085 | 11/03/21 | North America / Mexico / Mexico City | Human | Male   | 63 | unknown      | Oropharyngeal swab |
| hCoV-19/Mexico/CMX-INMEGEN-03-09-33/2021  | EPI_ISL_1406087 | 11/03/21 | North America / Mexico / Mexico City | Human | Female | 48 | unknown      | Oropharyngeal swab |
| hCoV-19/Mexico/CMX-INMEGEN-03-09-34/2021  | EPI_ISL_1406088 | 11/03/21 | North America / Mexico / Mexico City | Human | Female | 25 | unknown      | Oropharyngeal swab |
| hCoV-19/Mexico/CMX-INMEGEN-03-09-35/2021  | EPI_ISL_1406089 | 11/03/21 | North America / Mexico / Mexico City | Human | Male   | 36 | unknown      | Oropharyngeal swab |
| hCoV-19/Mexico/CMX-INMEGEN-03-09-36/2021  | EPI_ISL_1406090 | 11/03/21 | North America / Mexico / Mexico City | Human | Male   | 59 | unknown      | Oropharyngeal swab |
| hCoV-19/Mexico/CMX-INMEGEN-03-09-37/2021  | EPI_ISL_1406091 | 11/03/21 | North America / Mexico / Mexico City | Human | Female | 61 | unknown      | Oropharyngeal swab |
| hCoV-19/Mexico/CMX-INMEGEN-03-09-38/2021  | EPI_ISL_1406092 | 11/03/21 | North America / Mexico / Mexico City | Human | Female | 22 | unknown      | Oropharyngeal swab |
| hCoV-19/Mexico/CMX-INMEGEN-03-09-39/2021  | EPI_ISL_1406093 | 11/03/21 | North America / Mexico / Mexico City | Human | Female | 68 | unknown      | Oropharyngeal swab |
| hCoV-19/Mexico/CMX-INMEGEN-03-09-41/2021  | EPI_ISL_1406094 | 11/03/21 | North America / Mexico / Mexico City | Human | Female | 56 | unknown      | Oropharyngeal swab |
| hCoV-19/Mexico/CMX-INMEGEN-03-09-42/2021  | EPI_ISL_1406095 | 12/03/21 | North America / Mexico / Mexico City | Human | Male   | 47 | unknown      | Oropharyngeal swab |
| hCoV-19/Mexico/CMX-INMEGEN-03-09-43/2021  | EPI_ISL_1406096 | 12/03/21 | North America / Mexico / Mexico City | Human | Male   | 81 | unknown      | Oropharyngeal swab |
| hCoV-19/Mexico/CMX-INMEGEN-03-09-44/2021  | EPI_ISL_1406097 | 12/03/21 | North America / Mexico / Mexico City | Human | Male   | 25 | unknown      | Oropharyngeal swab |
| hCoV-19/Mexico/CMX-INMEGEN-03-09-45/2021  | EPI_ISL_1406098 | 12/03/21 | North America / Mexico / Mexico City | Human | Male   | 58 | unknown      | Oropharyngeal swab |
| hCoV-19/Mexico/CMX-INMEGEN-03-09-46/2021  | EPI_ISL_1406099 | 12/03/21 | North America / Mexico / Mexico City | Human | Female | 82 | unknown      | Oropharyngeal swab |
| hCoV-19/Mexico/CMX-INMEGEN-03-09-47/2021  | EPI_ISL_1406100 | 12/03/21 | North America / Mexico / Mexico City | Human | Male   | 55 | unknown      | Oropharyngeal swab |
| hCoV-19/Mexico/CMX-INMEGEN-03-09-48/2021  | EPI_ISL_1406101 | 12/03/21 | North America / Mexico / Mexico City | Human | Male   | 56 | unknown      | Oropharyngeal swab |
| hCoV-19/Mexico/CMX-INMEGEN-03-09-49/2021  | EPI_ISL_1406102 | 12/03/21 | North America / Mexico / Mexico City | Human | Male   | 34 | unknown      | Oropharyngeal swab |
| hCoV-19/Mexico/CMX-INMEGEN-03-09-50/2021  | EPI_ISL_1406103 | 12/03/21 | North America / Mexico / Mexico City | Human | Male   | 33 | unknown      | Oropharyngeal swab |





|                                            |                 |          |                                          |       |        |    |              |
|--------------------------------------------|-----------------|----------|------------------------------------------|-------|--------|----|--------------|
| hCoV-19/Mexico/CMX-INER-INMEGEN-00059/2021 | EPI_ISL_1406772 | 23/02/21 | North America / Mexico / Mexico City     | Human | Female | 83 | unknown      |
| hCoV-19/Mexico/CMX-INER-INMEGEN-00060/2021 | EPI_ISL_1406773 | 23/02/21 | North America / Mexico / Mexico City     | Human | Male   | 59 | unknown      |
| hCoV-19/Mexico/CMX-INER-INMEGEN-00061/2021 | EPI_ISL_1406774 | 23/02/21 | North America / Mexico / Mexico City     | Human | Female | 50 | unknown      |
| hCoV-19/Mexico/CMX-INER-INMEGEN-00062/2021 | EPI_ISL_1406775 | 24/02/21 | North America / Mexico / Mexico City     | Human | Female | 21 | unknown      |
| hCoV-19/Mexico/CMX-INER-INMEGEN-00063/2021 | EPI_ISL_1406776 | 25/02/21 | North America / Mexico / Mexico City     | Human | Female | 39 | unknown      |
| hCoV-19/Mexico/CMX-INER-INMEGEN-00064/2021 | EPI_ISL_1406777 | 01/03/21 | North America / Mexico / Mexico City     | Human | Female | 24 | unknown      |
| hCoV-19/Mexico/QUE-IBT-IMSS-684/2021       | EPI_ISL_1416332 | 05/03/21 | North America / Mexico / Queretaro       | Human | Male   | 53 | Ambulatory   |
| hCoV-19/Mexico/QUE-IBT-IMSS-889/2021       | EPI_ISL_1416333 | 06/03/21 | North America / Mexico / Queretaro       | Human | Male   | 83 | Hospitalized |
| hCoV-19/Mexico/QUE-IBT-IMSS-903/2021       | EPI_ISL_1416334 | 06/03/21 | North America / Mexico / Queretaro       | Human | Male   | 64 | Hospitalized |
| hCoV-19/Mexico/MEX-IBT-IMSS-914/2021       | EPI_ISL_1416335 | 06/03/21 | North America / Mexico / State of Mexico | Human | Male   | 73 | Hospitalized |
| hCoV-19/Mexico/MEX-IBT-IMSS-925/2021       | EPI_ISL_1416336 | 07/03/21 | North America / Mexico / State of Mexico | Human | Female | 65 | Hospitalized |
| hCoV-19/Mexico/CMX-IBT-IMSS-933/2021       | EPI_ISL_1416337 | 07/03/21 | North America / Mexico / Mexico City     | Human | Male   | 26 | Ambulatory   |
| hCoV-19/Mexico/MEX-IBT-IMSS-953/2021       | EPI_ISL_1416338 | 03/03/21 | North America / Mexico / State of Mexico | Human | Male   | 55 | Ambulatory   |
| hCoV-19/Mexico/PUE-IBT-IMSS-608/2021       | EPI_ISL_1416339 | 05/03/21 | North America / Mexico / Puebla          | Human | Female | 30 | Ambulatory   |
| hCoV-19/Mexico/PUE-IBT-IMSS-624/2021       | EPI_ISL_1416340 | 05/03/21 | North America / Mexico / Puebla          | Human | Female | 60 | Ambulatory   |
| hCoV-19/Mexico/PUE-IBT-IMSS-643/2021       | EPI_ISL_1416341 | 05/03/21 | North America / Mexico / Puebla          | Human | Female | 22 | Ambulatory   |
| hCoV-19/Mexico/PUE-IBT-IMSS-672/2021       | EPI_ISL_1416342 | 04/03/21 | North America / Mexico / Puebla          | Human | Female | 54 | Ambulatory   |
| hCoV-19/Mexico/PUE-IBT-IMSS-695/2021       | EPI_ISL_1416344 | 04/03/21 | North America / Mexico / Puebla          | Human | Male   | 50 | Ambulatory   |
| hCoV-19/Mexico/PUE-IBT-IMSS-716/2021       | EPI_ISL_1416346 | 05/03/21 | North America / Mexico / Puebla          | Human | Female | 48 | Ambulatory   |
| hCoV-19/Mexico/PUE-IBT-IMSS-725/2021       | EPI_ISL_1416347 | 04/03/21 | North America / Mexico / Puebla          | Human | Female | 22 | Ambulatory   |
| hCoV-19/Mexico/PUE-IBT-IMSS-736/2021       | EPI_ISL_1416348 | 04/03/21 | North America / Mexico / Puebla          | Human | Female | 42 | Ambulatory   |
| hCoV-19/Mexico/PUE-IBT-IMSS-747/2021       | EPI_ISL_1416349 | 04/03/21 | North America / Mexico / Puebla          | Human | Female | 42 | Ambulatory   |
| hCoV-19/Mexico/PUE-IBT-IMSS-757/2021       | EPI_ISL_1416350 | 04/03/21 | North America / Mexico / Puebla          | Human | Male   | 55 | Ambulatory   |
| hCoV-19/Mexico/PUE-IBT-IMSS-768/2021       | EPI_ISL_1416351 | 04/03/21 | North America / Mexico / Puebla          | Human | Male   | 39 | Ambulatory   |
| hCoV-19/Mexico/PUE-IBT-IMSS-788/2021       | EPI_ISL_1416353 | 05/03/21 | North America / Mexico / Puebla          | Human | Female | 92 | Hospitalized |
| hCoV-19/Mexico/PUE-IBT-IMSS-800/2021       | EPI_ISL_1416354 | 05/03/21 | North America / Mexico / Puebla          | Human | Female | 62 | Hospitalized |
| hCoV-19/Mexico/PUE-IBT-IMSS-811/2021       | EPI_ISL_1416355 | 06/03/21 | North America / Mexico / Puebla          | Human | Female | 52 | Ambulatory   |
| hCoV-19/Mexico/PUE-IBT-IMSS-820/2021       | EPI_ISL_1416356 | 07/03/21 | North America / Mexico / Puebla          | Human | Female | 56 | Hospitalized |
| hCoV-19/Mexico/PUE-IBT-IMSS-837/2021       | EPI_ISL_1416358 | 07/03/21 | North America / Mexico / Puebla          | Human | Male   | 49 | Ambulatory   |
| hCoV-19/Mexico/PUE-IBT-IMSS-847/2021       | EPI_ISL_1416359 | 05/03/21 | North America / Mexico / Puebla          | Human | Female | 35 | Ambulatory   |
| hCoV-19/Mexico/PUE-IBT-IMSS-857/2021       | EPI_ISL_1416360 | 05/03/21 | North America / Mexico / Puebla          | Human | Female | 45 | Ambulatory   |
| hCoV-19/Mexico/PUE-IBT-IMSS-868/2021       | EPI_ISL_1416361 | 05/03/21 | North America / Mexico / Puebla          | Human | Male   | 43 | Ambulatory   |
| hCoV-19/Mexico/PUE-IBT-IMSS-877/2021       | EPI_ISL_1416362 | 06/03/21 | North America / Mexico / Puebla          | Human | Male   | 37 | Ambulatory   |
| hCoV-19/Mexico/PUE-IBT-IMSS-888/2021       | EPI_ISL_1416363 | 05/03/21 | North America / Mexico / Puebla          | Human | Female | 28 | Ambulatory   |
| hCoV-19/Mexico/PUE-IBT-IMSS-895/2021       | EPI_ISL_1416364 | 06/03/21 | North America / Mexico / Puebla          | Human | Male   | 28 | Ambulatory   |
| hCoV-19/Mexico/PUE-IBT-IMSS-896/2021       | EPI_ISL_1416365 | 05/03/21 | North America / Mexico / Puebla          | Human | Male   | 32 | Ambulatory   |
| hCoV-19/Mexico/PUE-IBT-IMSS-897/2021       | EPI_ISL_1416366 | 05/03/21 | North America / Mexico / Puebla          | Human | Female | 46 | Ambulatory   |
| hCoV-19/Mexico/PUE-IBT-IMSS-898/2021       | EPI_ISL_1416367 | 05/03/21 | North America / Mexico / Puebla          | Human | Male   | 69 | Ambulatory   |
| hCoV-19/Mexico/PUE-IBT-IMSS-899/2021       | EPI_ISL_1416368 | 05/03/21 | North America / Mexico / Puebla          | Human | Male   | 42 | Ambulatory   |
| hCoV-19/Mexico/PUE-IBT-IMSS-901/2021       | EPI_ISL_1416370 | 05/03/21 | North America / Mexico / Puebla          | Human | Male   | 50 | Ambulatory   |
| hCoV-19/Mexico/PUE-IBT-IMSS-902/2021       | EPI_ISL_1416371 | 05/03/21 | North America / Mexico / Puebla          | Human | Female | 36 | Ambulatory   |
| hCoV-19/Mexico/PUE-IBT-IMSS-904/2021       | EPI_ISL_1416372 | 04/03/21 | North America / Mexico / Puebla          | Human | Male   | 72 | Ambulatory   |
| hCoV-19/Mexico/PUE-IBT-IMSS-906/2021       | EPI_ISL_1416374 | 05/03/21 | North America / Mexico / Puebla          | Human | Male   | 25 | Ambulatory   |
| hCoV-19/Mexico/PUE-IBT-IMSS-907/2021       | EPI_ISL_1416375 | 04/03/21 | North America / Mexico / Puebla          | Human | Male   | 44 | Ambulatory   |

|                                      |                 |          |                                          |       |        |    |              |
|--------------------------------------|-----------------|----------|------------------------------------------|-------|--------|----|--------------|
| hCoV-19/Mexico/PUE-IBT-IMSS-908/2021 | EPI_ISL_1416376 | 05/03/21 | North America / Mexico / Puebla          | Human | Female | 48 | Ambulatory   |
| hCoV-19/Mexico/PUE-IBT-IMSS-909/2021 | EPI_ISL_1416377 | 04/03/21 | North America / Mexico / Puebla          | Human | Female | 30 | Ambulatory   |
| hCoV-19/Mexico/PUE-IBT-IMSS-910/2021 | EPI_ISL_1416378 | 04/03/21 | North America / Mexico / Puebla          | Human | Male   | 46 | Ambulatory   |
| hCoV-19/Mexico/PUE-IBT-IMSS-911/2021 | EPI_ISL_1416379 | 04/03/21 | North America / Mexico / Puebla          | Human | Female | 32 | Ambulatory   |
| hCoV-19/Mexico/PUE-IBT-IMSS-912/2021 | EPI_ISL_1416380 | 04/03/21 | North America / Mexico / Puebla          | Human | Male   | 48 | Ambulatory   |
| hCoV-19/Mexico/PUE-IBT-IMSS-913/2021 | EPI_ISL_1416381 | 04/03/21 | North America / Mexico / Puebla          | Human | Male   | 30 | Ambulatory   |
| hCoV-19/Mexico/MEX-IBT-IMSS-915/2021 | EPI_ISL_1416382 | 07/03/21 | North America / Mexico / State of Mexico | Human | Male   | 68 | Hospitalized |
| hCoV-19/Mexico/MEX-IBT-IMSS-916/2021 | EPI_ISL_1416383 | 07/03/21 | North America / Mexico / State of Mexico | Human | Male   | 48 | Hospitalized |
| hCoV-19/Mexico/MEX-IBT-IMSS-917/2021 | EPI_ISL_1416384 | 08/03/21 | North America / Mexico / State of Mexico | Human | Female | 31 | Ambulatory   |
| hCoV-19/Mexico/SLP-IBT-IMSS-918/2021 | EPI_ISL_1416385 | 08/03/21 | North America / Mexico / San Luis Potosi | Human | Female | 22 | Ambulatory   |
| hCoV-19/Mexico/SLP-IBT-IMSS-919/2021 | EPI_ISL_1416386 | 08/03/21 | North America / Mexico / San Luis Potosi | Human | Female | 63 | Hospitalized |
| hCoV-19/Mexico/SLP-IBT-IMSS-920/2021 | EPI_ISL_1416387 | 08/03/21 | North America / Mexico / San Luis Potosi | Human | Female | 43 | Hospitalized |
| hCoV-19/Mexico/MEX-IBT-IMSS-921/2021 | EPI_ISL_1416388 | 07/03/21 | North America / Mexico / State of Mexico | Human | Female | 58 | Hospitalized |
| hCoV-19/Mexico/MEX-IBT-IMSS-922/2021 | EPI_ISL_1416389 | 04/03/21 | North America / Mexico / State of Mexico | Human | Female | 84 | Hospitalized |
| hCoV-19/Mexico/MEX-IBT-IMSS-923/2021 | EPI_ISL_1416390 | 09/03/21 | North America / Mexico / State of Mexico | Human | Male   | 80 | Ambulatory   |
| hCoV-19/Mexico/CMX-IBT-IMSS-924/2021 | EPI_ISL_1416391 | 07/03/21 | North America / Mexico / Mexico City     | Human | Female | 49 | Ambulatory   |
| hCoV-19/Mexico/CMX-IBT-IMSS-926/2021 | EPI_ISL_1416392 | 07/03/21 | North America / Mexico / Mexico City     | Human | Female | 51 | Ambulatory   |
| hCoV-19/Mexico/CMX-IBT-IMSS-927/2021 | EPI_ISL_1416393 | 07/03/21 | North America / Mexico / Mexico City     | Human | Female | 51 | Hospitalized |
| hCoV-19/Mexico/CMX-IBT-IMSS-928/2021 | EPI_ISL_1416394 | 07/03/21 | North America / Mexico / Mexico City     | Human | Male   | 62 | Hospitalized |
| hCoV-19/Mexico/CMX-IBT-IMSS-929/2021 | EPI_ISL_1416395 | 07/03/21 | North America / Mexico / Mexico City     | Human | Male   | 80 | Hospitalized |
| hCoV-19/Mexico/CMX-IBT-IMSS-930/2021 | EPI_ISL_1416396 | 07/03/21 | North America / Mexico / Mexico City     | Human | Female | 27 | Ambulatory   |
| hCoV-19/Mexico/MEX-IBT-IMSS-931/2021 | EPI_ISL_1416397 | 05/03/21 | North America / Mexico / State of Mexico | Human | Male   | 33 | Ambulatory   |
| hCoV-19/Mexico/MEX-IBT-IMSS-932/2021 | EPI_ISL_1416398 | 05/03/21 | North America / Mexico / State of Mexico | Human | Female | 65 | Ambulatory   |
| hCoV-19/Mexico/MEX-IBT-IMSS-934/2021 | EPI_ISL_1416399 | 08/03/21 | North America / Mexico / State of Mexico | Human | Male   | 55 | Hospitalized |
| hCoV-19/Mexico/CMX-IBT-IMSS-935/2021 | EPI_ISL_1416400 | 07/03/21 | North America / Mexico / Mexico City     | Human | Female | 77 | Hospitalized |
| hCoV-19/Mexico/MEX-IBT-IMSS-936/2021 | EPI_ISL_1416401 | 09/03/21 | North America / Mexico / State of Mexico | Human | Male   | 33 | Hospitalized |
| hCoV-19/Mexico/CMX-IBT-IMSS-937/2021 | EPI_ISL_1416402 | 07/03/21 | North America / Mexico / Mexico City     | Human | Female | 51 | Hospitalized |
| hCoV-19/Mexico/CMX-IBT-IMSS-938/2021 | EPI_ISL_1416403 | 07/03/21 | North America / Mexico / Mexico City     | Human | Female | 46 | Hospitalized |
| hCoV-19/Mexico/CMX-IBT-IMSS-939/2021 | EPI_ISL_1416404 | 07/03/21 | North America / Mexico / Mexico City     | Human | Female | 60 | Ambulatory   |
| hCoV-19/Mexico/MEX-IBT-IMSS-940/2021 | EPI_ISL_1416405 | 05/03/21 | North America / Mexico / State of Mexico | Human | Female | 15 | Hospitalized |
| hCoV-19/Mexico/MEX-IBT-IMSS-941/2021 | EPI_ISL_1416406 | 08/03/21 | North America / Mexico / State of Mexico | Human | Male   | 63 | Hospitalized |
| hCoV-19/Mexico/MEX-IBT-IMSS-942/2021 | EPI_ISL_1416407 | 09/03/21 | North America / Mexico / State of Mexico | Human | Male   | 28 | Hospitalized |
| hCoV-19/Mexico/CMX-IBT-IMSS-943/2021 | EPI_ISL_1416408 | 07/03/21 | North America / Mexico / Mexico City     | Human | Female | 48 | Ambulatory   |
| hCoV-19/Mexico/CMX-IBT-IMSS-944/2021 | EPI_ISL_1416409 | 07/03/21 | North America / Mexico / Mexico City     | Human | Male   | 51 | Ambulatory   |
| hCoV-19/Mexico/QUE-IBT-IMSS-946/2021 | EPI_ISL_1416411 | 06/03/21 | North America / Mexico / Queretaro       | Human | Male   | 36 | Ambulatory   |
| hCoV-19/Mexico/MEX-IBT-IMSS-947/2021 | EPI_ISL_1416412 | 09/03/21 | North America / Mexico / State of Mexico | Human | Male   | 63 | Hospitalized |
| hCoV-19/Mexico/OAX-IBT-IMSS-949/2021 | EPI_ISL_1416413 | 09/03/21 | North America / Mexico / Oaxaca          | Human | Male   | 47 | Hospitalized |
| hCoV-19/Mexico/MEX-IBT-IMSS-950/2021 | EPI_ISL_1416414 | 09/03/21 | North America / Mexico / State of Mexico | Human | Female | 63 | Hospitalized |
| hCoV-19/Mexico/VER-IBT-IMSS-886/2021 | EPI_ISL_1416415 | 09/03/21 | North America / Mexico / Veracruz        | Human | Male   | 55 | Hospitalized |
| hCoV-19/Mexico/VER-IBT-IMSS-887/2021 | EPI_ISL_1416416 | 09/03/21 | North America / Mexico / Veracruz        | Human | Female | 48 | Ambulatory   |
| hCoV-19/Mexico/VER-IBT-IMSS-890/2021 | EPI_ISL_1416417 | 09/03/21 | North America / Mexico / Veracruz        | Human | Female | 38 | Ambulatory   |
| hCoV-19/Mexico/VER-IBT-IMSS-891/2021 | EPI_ISL_1416418 | 09/03/21 | North America / Mexico / Veracruz        | Human | Male   | 23 | Ambulatory   |
| hCoV-19/Mexico/GRO-IBT-IMSS-951/2021 | EPI_ISL_1416419 | 04/03/21 | North America / Mexico / Guerrero        | Human | Male   | 0  | Ambulatory   |
| hCoV-19/Mexico/VER-IBT-IMSS-588/2021 | EPI_ISL_1416422 | 09/03/21 | North America / Mexico / Veracruz        | Human | Female | 47 | Hospitalized |

|                                      |                 |          |                                              |       |        |    |              |
|--------------------------------------|-----------------|----------|----------------------------------------------|-------|--------|----|--------------|
| hCoV-19/Mexico/VER-IBT-IMSS-589/2021 | EPI_ISL_1416423 | 09/03/21 | North America / Mexico / Veracruz            | Human | Male   | 85 | Hospitalized |
| hCoV-19/Mexico/VER-IBT-IMSS-591/2021 | EPI_ISL_1416424 | 09/03/21 | North America / Mexico / Veracruz            | Human | Male   | 34 | Ambulatory   |
| hCoV-19/Mexico/VER-IBT-IMSS-592/2021 | EPI_ISL_1416425 | 09/03/21 | North America / Mexico / Veracruz            | Human | Male   | 45 | Ambulatory   |
| hCoV-19/Mexico/VER-IBT-IMSS-892/2021 | EPI_ISL_1416427 | 09/03/21 | North America / Mexico / Veracruz            | Human | Female | 44 | Ambulatory   |
| hCoV-19/Mexico/VER-IBT-IMSS-594/2021 | EPI_ISL_1416428 | 09/03/21 | North America / Mexico / Veracruz            | Human | Male   | 75 | Hospitalized |
| hCoV-19/Mexico/VER-IBT-IMSS-595/2021 | EPI_ISL_1416429 | 09/03/21 | North America / Mexico / Veracruz            | Human | Female | 36 | Ambulatory   |
| hCoV-19/Mexico/VER-IBT-IMSS-596/2021 | EPI_ISL_1416430 | 09/03/21 | North America / Mexico / Veracruz            | Human | Female | 38 | Ambulatory   |
| hCoV-19/Mexico/VER-IBT-IMSS-598/2021 | EPI_ISL_1416431 | 09/03/21 | North America / Mexico / Veracruz            | Human | Female | 50 | Hospitalized |
| hCoV-19/Mexico/VER-IBT-IMSS-599/2021 | EPI_ISL_1416432 | 09/03/21 | North America / Mexico / Veracruz            | Human | Female | 31 | Ambulatory   |
| hCoV-19/Mexico/VER-IBT-IMSS-602/2021 | EPI_ISL_1416435 | 09/03/21 | North America / Mexico / Veracruz            | Human | Male   | 59 | Hospitalized |
| hCoV-19/Mexico/MEX-IBT-IMSS-603/2021 | EPI_ISL_1416436 | 08/03/21 | North America / Mexico / State of Mexico     | Human | Female | 40 | Hospitalized |
| hCoV-19/Mexico/VER-IBT-IMSS-604/2021 | EPI_ISL_1416437 | 09/03/21 | North America / Mexico / Veracruz            | Human | Female | 50 | Hospitalized |
| hCoV-19/Mexico/VER-IBT-IMSS-605/2021 | EPI_ISL_1416438 | 09/03/21 | North America / Mexico / Veracruz            | Human | Male   | 27 | Ambulatory   |
| hCoV-19/Mexico/VER-IBT-IMSS-606/2021 | EPI_ISL_1416439 | 09/03/21 | North America / Mexico / Veracruz            | Human | Female | 86 | Hospitalized |
| hCoV-19/Mexico/VER-IBT-IMSS-607/2021 | EPI_ISL_1416440 | 09/03/21 | North America / Mexico / Veracruz            | Human | Female | 39 | Ambulatory   |
| hCoV-19/Mexico/SLP-IBT-IMSS-609/2021 | EPI_ISL_1416441 | 08/03/21 | North America / Mexico / San Luis Potosi     | Human | Male   | 55 | Hospitalized |
| hCoV-19/Mexico/SLP-IBT-IMSS-610/2021 | EPI_ISL_1416442 | 08/03/21 | North America / Mexico / San Luis Potosi     | Human | Female | 10 | Ambulatory   |
| hCoV-19/Mexico/SLP-IBT-IMSS-611/2021 | EPI_ISL_1416443 | 08/03/21 | North America / Mexico / San Luis Potosi     | Human | Female | 60 | Hospitalized |
| hCoV-19/Mexico/SLP-IBT-IMSS-612/2021 | EPI_ISL_1416444 | 08/03/21 | North America / Mexico / San Luis Potosi     | Human | Female | 92 | Hospitalized |
| hCoV-19/Mexico/SLP-IBT-IMSS-613/2021 | EPI_ISL_1416445 | 08/03/21 | North America / Mexico / San Luis Potosi     | Human | Female | 36 | Hospitalized |
| hCoV-19/Mexico/SLP-IBT-IMSS-614/2021 | EPI_ISL_1416446 | 08/03/21 | North America / Mexico / San Luis Potosi     | Human | Female | 20 | Ambulatory   |
| hCoV-19/Mexico/SLP-IBT-IMSS-615/2021 | EPI_ISL_1416447 | 08/03/21 | North America / Mexico / San Luis Potosi     | Human | Female | 22 | Hospitalized |
| hCoV-19/Mexico/PUE-IBT-IMSS-616/2021 | EPI_ISL_1416448 | 06/03/21 | North America / Mexico / Puebla              | Human | Male   | 82 | Ambulatory   |
| hCoV-19/Mexico/PUE-IBT-IMSS-619/2021 | EPI_ISL_1416450 | 08/03/21 | North America / Mexico / Puebla              | Human | Male   | 66 | Ambulatory   |
| hCoV-19/Mexico/PUE-IBT-IMSS-620/2021 | EPI_ISL_1416451 | 07/03/21 | North America / Mexico / Puebla              | Human | Male   | 59 | Ambulatory   |
| hCoV-19/Mexico/PUE-IBT-IMSS-621/2021 | EPI_ISL_1416452 | 06/03/21 | North America / Mexico / Puebla              | Human | Female | 51 | Ambulatory   |
| hCoV-19/Mexico/VER-IBT-IMSS-622/2021 | EPI_ISL_1416453 | 09/03/21 | North America / Mexico / Veracruz            | Human | Male   | 35 | Ambulatory   |
| hCoV-19/Mexico/VER-IBT-IMSS-623/2021 | EPI_ISL_1416454 | 09/03/21 | North America / Mexico / Veracruz            | Human | Female | 64 | Ambulatory   |
| hCoV-19/Mexico/PUE-IBT-IMSS-626/2021 | EPI_ISL_1416456 | 07/03/21 | North America / Mexico / Puebla              | Human | Female | 46 | Ambulatory   |
| hCoV-19/Mexico/PUE-IBT-IMSS-627/2021 | EPI_ISL_1416457 | 08/03/21 | North America / Mexico / Puebla              | Human | Male   | 48 | Ambulatory   |
| hCoV-19/Mexico/PUE-IBT-IMSS-628/2021 | EPI_ISL_1416458 | 05/03/21 | North America / Mexico / Puebla              | Human | Female | 23 | Ambulatory   |
| hCoV-19/Mexico/PUE-IBT-IMSS-629/2021 | EPI_ISL_1416459 | 05/03/21 | North America / Mexico / Puebla              | Human | Female | 33 | Ambulatory   |
| hCoV-19/Mexico/PUE-IBT-IMSS-630/2021 | EPI_ISL_1416460 | 08/03/21 | North America / Mexico / Puebla              | Human | Female | 29 | Ambulatory   |
| hCoV-19/Mexico/PUE-IBT-IMSS-631/2021 | EPI_ISL_1416461 | 05/03/21 | North America / Mexico / Puebla              | Human | Female | 35 | Ambulatory   |
| hCoV-19/Mexico/PUE-IBT-IMSS-632/2021 | EPI_ISL_1416462 | 08/03/21 | North America / Mexico / Puebla              | Human | Male   | 34 | Ambulatory   |
| hCoV-19/Mexico/MEX-IBT-IMSS-633/2021 | EPI_ISL_1416463 | 09/03/21 | North America / Mexico / State of Mexico     | Human | Male   | 25 | Ambulatory   |
| hCoV-19/Mexico/MEX-IBT-IMSS-635/2021 | EPI_ISL_1416464 | 07/03/21 | North America / Mexico / State of Mexico     | Human | Male   | 50 | Hospitalized |
| hCoV-19/Mexico/MEX-IBT-IMSS-893/2021 | EPI_ISL_1416465 | 07/03/21 | North America / Mexico / State of Mexico     | Human | Male   | 82 | Hospitalized |
| hCoV-19/Mexico/MEX-IBT-IMSS-636/2021 | EPI_ISL_1416466 | 07/03/21 | North America / Mexico / State of Mexico     | Human | Female | 63 | Hospitalized |
| hCoV-19/Mexico/MEX-IBT-IMSS-637/2021 | EPI_ISL_1416467 | 08/03/21 | North America / Mexico / State of Mexico     | Human | Female | 61 | Hospitalized |
| hCoV-19/Mexico/BCS-IBT-IMSS-638/2021 | EPI_ISL_1416468 | 07/03/21 | North America / Mexico / Baja California Sur | Human | Male   | 37 | Ambulatory   |
| hCoV-19/Mexico/BCS-IBT-IMSS-639/2021 | EPI_ISL_1416469 | 07/03/21 | North America / Mexico / Baja California Sur | Human | Male   | 24 | Ambulatory   |
| hCoV-19/Mexico/BCS-IBT-IMSS-640/2021 | EPI_ISL_1416470 | 07/03/21 | North America / Mexico / Baja California Sur | Human | Male   | 35 | Ambulatory   |
| hCoV-19/Mexico/BCS-IBT-IMSS-641/2021 | EPI_ISL_1416471 | 07/03/21 | North America / Mexico / Baja California Sur | Human | Female | 18 | Ambulatory   |



|                                      |                 |          |                                              |       |        |    |              |
|--------------------------------------|-----------------|----------|----------------------------------------------|-------|--------|----|--------------|
| hCoV-19/Mexico/BCS-IBT-IMSS-642/2021 | EPI_ISL_1416472 | 07/03/21 | North America / Mexico / Baja California Sur | Human | Female | 89 | Hospitalized |
| hCoV-19/Mexico/BCS-IBT-IMSS-644/2021 | EPI_ISL_1416473 | 07/03/21 | North America / Mexico / Baja California Sur | Human | Male   | 56 | Ambulatory   |
| hCoV-19/Mexico/BCS-IBT-IMSS-645/2021 | EPI_ISL_1416474 | 07/03/21 | North America / Mexico / Baja California Sur | Human | Male   | 46 | Ambulatory   |
| hCoV-19/Mexico/CMX-IBT-IMSS-646/2021 | EPI_ISL_1416475 | 07/03/21 | North America / Mexico / Mexico City         | Human | Male   | 70 | Hospitalized |
| hCoV-19/Mexico/CMX-IBT-IMSS-647/2021 | EPI_ISL_1416476 | 07/03/21 | North America / Mexico / Mexico City         | Human | Male   | 40 | Hospitalized |
| hCoV-19/Mexico/CMX-IBT-IMSS-648/2021 | EPI_ISL_1416477 | 07/03/21 | North America / Mexico / Mexico City         | Human | Female | 67 | Hospitalized |
| hCoV-19/Mexico/CMX-IBT-IMSS-649/2021 | EPI_ISL_1416478 | 07/03/21 | North America / Mexico / Mexico City         | Human | Male   | 74 | Hospitalized |
| hCoV-19/Mexico/CMX-IBT-IMSS-650/2021 | EPI_ISL_1416479 | 07/03/21 | North America / Mexico / Mexico City         | Human | Male   | 46 | Hospitalized |
| hCoV-19/Mexico/CMX-IBT-IMSS-651/2021 | EPI_ISL_1416480 | 07/03/21 | North America / Mexico / Mexico City         | Human | Male   | 73 | Ambulatory   |
| hCoV-19/Mexico/CMX-IBT-IMSS-652/2021 | EPI_ISL_1416481 | 07/03/21 | North America / Mexico / Mexico City         | Human | Male   | 35 | Ambulatory   |
| hCoV-19/Mexico/CMX-IBT-IMSS-653/2021 | EPI_ISL_1416482 | 07/03/21 | North America / Mexico / Mexico City         | Human | Female | 45 | Ambulatory   |
| hCoV-19/Mexico/CMX-IBT-IMSS-654/2021 | EPI_ISL_1416483 | 07/03/21 | North America / Mexico / Mexico City         | Human | Female | 38 | Ambulatory   |
| hCoV-19/Mexico/CMX-IBT-IMSS-655/2021 | EPI_ISL_1416484 | 07/03/21 | North America / Mexico / Mexico City         | Human | Female | 39 | Ambulatory   |
| hCoV-19/Mexico/MEX-IBT-IMSS-656/2021 | EPI_ISL_1416485 | 09/03/21 | North America / Mexico / State of Mexico     | Human | Male   | 40 | Hospitalized |
| hCoV-19/Mexico/MEX-IBT-IMSS-657/2021 | EPI_ISL_1416486 | 06/03/21 | North America / Mexico / State of Mexico     | Human | Male   | 70 | Hospitalized |
| hCoV-19/Mexico/CMX-IBT-IMSS-658/2021 | EPI_ISL_1416487 | 07/03/21 | North America / Mexico / Mexico City         | Human | Male   | 87 | Hospitalized |
| hCoV-19/Mexico/CMX-IBT-IMSS-660/2021 | EPI_ISL_1416488 | 07/03/21 | North America / Mexico / Mexico City         | Human | Female | 80 | Hospitalized |
| hCoV-19/Mexico/MEX-IBT-IMSS-662/2021 | EPI_ISL_1416490 | 09/03/21 | North America / Mexico / State of Mexico     | Human | Female | 57 | Hospitalized |
| hCoV-19/Mexico/CMX-IBT-IMSS-663/2021 | EPI_ISL_1416491 | 07/03/21 | North America / Mexico / Mexico City         | Human | Male   | 63 | Hospitalized |
| hCoV-19/Mexico/CMX-IBT-IMSS-664/2021 | EPI_ISL_1416492 | 07/03/21 | North America / Mexico / Mexico City         | Human | Male   | 26 | Ambulatory   |
| hCoV-19/Mexico/CMX-IBT-IMSS-665/2021 | EPI_ISL_1416493 | 07/03/21 | North America / Mexico / Mexico City         | Human | Male   | 65 | Hospitalized |
| hCoV-19/Mexico/QUE-IBT-IMSS-668/2021 | EPI_ISL_1416496 | 06/03/21 | North America / Mexico / Queretaro           | Human | Male   | 25 | Ambulatory   |
| hCoV-19/Mexico/MEX-IBT-IMSS-669/2021 | EPI_ISL_1416497 | 10/03/21 | North America / Mexico / State of Mexico     | Human | Male   | 68 | Hospitalized |
| hCoV-19/Mexico/PUE-IBT-IMSS-670/2021 | EPI_ISL_1416498 | 04/03/21 | North America / Mexico / Puebla              | Human | Male   | 66 | Hospitalized |
| hCoV-19/Mexico/PUE-IBT-IMSS-671/2021 | EPI_ISL_1416499 | 08/03/21 | North America / Mexico / Puebla              | Human | Male   | 50 | Ambulatory   |
| hCoV-19/Mexico/PUE-IBT-IMSS-673/2021 | EPI_ISL_1416500 | 07/03/21 | North America / Mexico / Puebla              | Human | Female | 59 | Ambulatory   |
| hCoV-19/Mexico/PUE-IBT-IMSS-674/2021 | EPI_ISL_1416501 | 09/03/21 | North America / Mexico / Puebla              | Human | Male   | 49 | Ambulatory   |
| hCoV-19/Mexico/PUE-IBT-IMSS-675/2021 | EPI_ISL_1416502 | 08/03/21 | North America / Mexico / Puebla              | Human | Male   | 61 | Ambulatory   |
| hCoV-19/Mexico/PUE-IBT-IMSS-676/2021 | EPI_ISL_1416503 | 08/03/21 | North America / Mexico / Puebla              | Human | Male   | 46 | Ambulatory   |
| hCoV-19/Mexico/PUE-IBT-IMSS-677/2021 | EPI_ISL_1416504 | 08/03/21 | North America / Mexico / Puebla              | Human | Female | 49 | Ambulatory   |
| hCoV-19/Mexico/PUE-IBT-IMSS-678/2021 | EPI_ISL_1416505 | 09/03/21 | North America / Mexico / Puebla              | Human | Male   | 23 | Ambulatory   |
| hCoV-19/Mexico/PUE-IBT-IMSS-679/2021 | EPI_ISL_1416506 | 04/03/21 | North America / Mexico / Puebla              | Human | Male   | 39 | Hospitalized |
| hCoV-19/Mexico/PUE-IBT-IMSS-680/2021 | EPI_ISL_1416507 | 05/03/21 | North America / Mexico / Puebla              | Human | Male   | 79 | Hospitalized |
| hCoV-19/Mexico/PUE-IBT-IMSS-681/2021 | EPI_ISL_1416508 | 08/03/21 | North America / Mexico / Puebla              | Human | Male   | 30 | Ambulatory   |
| hCoV-19/Mexico/PUE-IBT-IMSS-682/2021 | EPI_ISL_1416509 | 08/03/21 | North America / Mexico / Puebla              | Human | Male   | 63 | Ambulatory   |
| hCoV-19/Mexico/PUE-IBT-IMSS-685/2021 | EPI_ISL_1416510 | 08/03/21 | North America / Mexico / Puebla              | Human | Male   | 22 | Ambulatory   |
| hCoV-19/Mexico/PUE-IBT-IMSS-686/2021 | EPI_ISL_1416511 | 08/03/21 | North America / Mexico / Puebla              | Human | Female | 23 | Ambulatory   |
| hCoV-19/Mexico/PUE-IBT-IMSS-687/2021 | EPI_ISL_1416512 | 08/03/21 | North America / Mexico / Puebla              | Human | Male   | 51 | Ambulatory   |
| hCoV-19/Mexico/PUE-IBT-IMSS-688/2021 | EPI_ISL_1416513 | 05/03/21 | North America / Mexico / Puebla              | Human | Female | 36 | Ambulatory   |
| hCoV-19/Mexico/PUE-IBT-IMSS-689/2021 | EPI_ISL_1416514 | 08/03/21 | North America / Mexico / Puebla              | Human | Female | 51 | Ambulatory   |
| hCoV-19/Mexico/PUE-IBT-IMSS-690/2021 | EPI_ISL_1416515 | 05/03/21 | North America / Mexico / Puebla              | Human | Female | 60 | Ambulatory   |
| hCoV-19/Mexico/PUE-IBT-IMSS-691/2021 | EPI_ISL_1416516 | 09/03/21 | North America / Mexico / Puebla              | Human | Male   | 35 | Ambulatory   |
| hCoV-19/Mexico/PUE-IBT-IMSS-693/2021 | EPI_ISL_1416518 | 09/03/21 | North America / Mexico / Puebla              | Human | Female | 40 | Ambulatory   |
| hCoV-19/Mexico/PUE-IBT-IMSS-694/2021 | EPI_ISL_1416519 | 07/03/21 | North America / Mexico / Puebla              | Human | Male   | 47 | Hospitalized |

|                                      |                 |          |                                              |       |        |    |              |
|--------------------------------------|-----------------|----------|----------------------------------------------|-------|--------|----|--------------|
| hCoV-19/Mexico/PUE-IBT-IMSS-696/2021 | EPI_ISL_1416520 | 08/03/21 | North America / Mexico / Puebla              | Human | Female | 41 | Ambulatory   |
| hCoV-19/Mexico/PUE-IBT-IMSS-697/2021 | EPI_ISL_1416521 | 09/03/21 | North America / Mexico / Puebla              | Human | Female | 57 | Ambulatory   |
| hCoV-19/Mexico/PUE-IBT-IMSS-698/2021 | EPI_ISL_1416522 | 08/03/21 | North America / Mexico / Puebla              | Human | Male   | 40 | Ambulatory   |
| hCoV-19/Mexico/PUE-IBT-IMSS-699/2021 | EPI_ISL_1416523 | 08/03/21 | North America / Mexico / Puebla              | Human | Male   | 54 | Ambulatory   |
| hCoV-19/Mexico/PUE-IBT-IMSS-700/2021 | EPI_ISL_1416524 | 08/03/21 | North America / Mexico / Puebla              | Human | Female | 50 | Ambulatory   |
| hCoV-19/Mexico/PUE-IBT-IMSS-701/2021 | EPI_ISL_1416525 | 05/03/21 | North America / Mexico / Puebla              | Human | Male   | 56 | Ambulatory   |
| hCoV-19/Mexico/PUE-IBT-IMSS-702/2021 | EPI_ISL_1416526 | 08/03/21 | North America / Mexico / Puebla              | Human | Male   | 22 | Ambulatory   |
| hCoV-19/Mexico/PUE-IBT-IMSS-703/2021 | EPI_ISL_1416527 | 08/03/21 | North America / Mexico / Puebla              | Human | Male   | 49 | Ambulatory   |
| hCoV-19/Mexico/PUE-IBT-IMSS-704/2021 | EPI_ISL_1416528 | 05/03/21 | North America / Mexico / Puebla              | Human | Male   | 64 | Hospitalized |
| hCoV-19/Mexico/PUE-IBT-IMSS-705/2021 | EPI_ISL_1416529 | 05/03/21 | North America / Mexico / Puebla              | Human | Female | 43 | Ambulatory   |
| hCoV-19/Mexico/PUE-IBT-IMSS-707/2021 | EPI_ISL_1416530 | 09/03/21 | North America / Mexico / Puebla              | Human | Male   | 41 | Hospitalized |
| hCoV-19/Mexico/PUE-IBT-IMSS-708/2021 | EPI_ISL_1416531 | 09/03/21 | North America / Mexico / Puebla              | Human | Female | 82 | Hospitalized |
| hCoV-19/Mexico/PUE-IBT-IMSS-709/2021 | EPI_ISL_1416532 | 09/03/21 | North America / Mexico / Puebla              | Human | Female | 57 | Hospitalized |
| hCoV-19/Mexico/PUE-IBT-IMSS-710/2021 | EPI_ISL_1416533 | 09/03/21 | North America / Mexico / Puebla              | Human | Female | 69 | Hospitalized |
| hCoV-19/Mexico/TLA-IBT-IMSS-711/2021 | EPI_ISL_1416534 | 09/03/21 | North America / Mexico / Tlaxcala            | Human | Male   | 66 | Hospitalized |
| hCoV-19/Mexico/VER-IBT-IMSS-712/2021 | EPI_ISL_1416535 | 09/03/21 | North America / Mexico / Veracruz            | Human | Male   | 20 | Ambulatory   |
| hCoV-19/Mexico/VER-IBT-IMSS-713/2021 | EPI_ISL_1416536 | 09/03/21 | North America / Mexico / Veracruz            | Human | Male   | 24 | Ambulatory   |
| hCoV-19/Mexico/VER-IBT-IMSS-715/2021 | EPI_ISL_1416538 | 09/03/21 | North America / Mexico / Veracruz            | Human | Female | 84 | Hospitalized |
| hCoV-19/Mexico/VER-IBT-IMSS-717/2021 | EPI_ISL_1416539 | 09/03/21 | North America / Mexico / Veracruz            | Human | Female | 66 | Hospitalized |
| hCoV-19/Mexico/MOR-IBT-IMSS-718/2021 | EPI_ISL_1416540 | 09/03/21 | North America / Mexico / Morelos             | Human | Female | 74 | Hospitalized |
| hCoV-19/Mexico/MEX-IBT-IMSS-719/2021 | EPI_ISL_1416541 | 10/03/21 | North America / Mexico / State of Mexico     | Human | Female | 55 | Ambulatory   |
| hCoV-19/Mexico/HID-IBT-IMSS-721/2021 | EPI_ISL_1416543 | 09/03/21 | North America / Mexico / Hidalgo             | Human | Female | 49 | Ambulatory   |
| hCoV-19/Mexico/MEX-IBT-IMSS-724/2021 | EPI_ISL_1416546 | 10/03/21 | North America / Mexico / State of Mexico     | Human | Female | 32 | Ambulatory   |
| hCoV-19/Mexico/BCS-IBT-IMSS-726/2021 | EPI_ISL_1416547 | 10/03/21 | North America / Mexico / Baja California Sur | Human | Male   | 33 | Ambulatory   |
| hCoV-19/Mexico/BCS-IBT-IMSS-727/2021 | EPI_ISL_1416548 | 10/03/21 | North America / Mexico / Baja California Sur | Human | Male   | 61 | Ambulatory   |
| hCoV-19/Mexico/BCS-IBT-IMSS-728/2021 | EPI_ISL_1416549 | 10/03/21 | North America / Mexico / Baja California Sur | Human | Male   | 31 | Ambulatory   |
| hCoV-19/Mexico/SLP-IBT-IMSS-729/2021 | EPI_ISL_1416550 | 08/03/21 | North America / Mexico / San Luis Potosi     | Human | Male   | 16 | Hospitalized |
| hCoV-19/Mexico/SLP-IBT-IMSS-730/2021 | EPI_ISL_1416551 | 08/03/21 | North America / Mexico / San Luis Potosi     | Human | Male   | 26 | Ambulatory   |
| hCoV-19/Mexico/SLP-IBT-IMSS-731/2021 | EPI_ISL_1416552 | 08/03/21 | North America / Mexico / San Luis Potosi     | Human | Female | 67 | Hospitalized |
| hCoV-19/Mexico/SLP-IBT-IMSS-732/2021 | EPI_ISL_1416553 | 08/03/21 | North America / Mexico / San Luis Potosi     | Human | Male   | 39 | Hospitalized |
| hCoV-19/Mexico/SLP-IBT-IMSS-733/2021 | EPI_ISL_1416554 | 08/03/21 | North America / Mexico / San Luis Potosi     | Human | Male   | 74 | Hospitalized |
| hCoV-19/Mexico/CMX-IBT-IMSS-734/2021 | EPI_ISL_1416555 | 07/03/21 | North America / Mexico / Mexico City         | Human | Male   | 49 | Ambulatory   |
| hCoV-19/Mexico/VER-IBT-IMSS-738/2021 | EPI_ISL_1416558 | 09/03/21 | North America / Mexico / Veracruz            | Human | Male   | 63 | Hospitalized |
| hCoV-19/Mexico/VER-IBT-IMSS-739/2021 | EPI_ISL_1416559 | 09/03/21 | North America / Mexico / Veracruz            | Human | Female | 36 | Ambulatory   |
| hCoV-19/Mexico/VER-IBT-IMSS-740/2021 | EPI_ISL_1416560 | 09/03/21 | North America / Mexico / Veracruz            | Human | Male   | 46 | Hospitalized |
| hCoV-19/Mexico/PUE-IBT-IMSS-741/2021 | EPI_ISL_1416561 | 09/03/21 | North America / Mexico / Puebla              | Human | Male   | 61 | Hospitalized |
| hCoV-19/Mexico/PUE-IBT-IMSS-742/2021 | EPI_ISL_1416562 | 10/03/21 | North America / Mexico / Puebla              | Human | Male   | 58 | Hospitalized |
| hCoV-19/Mexico/PUE-IBT-IMSS-743/2021 | EPI_ISL_1416563 | 09/03/21 | North America / Mexico / Puebla              | Human | Male   | 42 | Hospitalized |
| hCoV-19/Mexico/PUE-IBT-IMSS-744/2021 | EPI_ISL_1416564 | 10/03/21 | North America / Mexico / Puebla              | Human | Female | 38 | Ambulatory   |
| hCoV-19/Mexico/PUE-IBT-IMSS-745/2021 | EPI_ISL_1416565 | 10/03/21 | North America / Mexico / Puebla              | Human | Female | 42 | Ambulatory   |
| hCoV-19/Mexico/PUE-IBT-IMSS-746/2021 | EPI_ISL_1416566 | 10/03/21 | North America / Mexico / Puebla              | Human | Female | 52 | Ambulatory   |
| hCoV-19/Mexico/PUE-IBT-IMSS-749/2021 | EPI_ISL_1416568 | 09/03/21 | North America / Mexico / Puebla              | Human | Female | 23 | Ambulatory   |
| hCoV-19/Mexico/PUE-IBT-IMSS-751/2021 | EPI_ISL_1416570 | 09/03/21 | North America / Mexico / Puebla              | Human | Male   | 42 | Ambulatory   |
| hCoV-19/Mexico/PUE-IBT-IMSS-753/2021 | EPI_ISL_1416572 | 09/03/21 | North America / Mexico / Puebla              | Human | Female | 48 | Ambulatory   |

|                                      |                 |          |                                              |       |        |    |              |
|--------------------------------------|-----------------|----------|----------------------------------------------|-------|--------|----|--------------|
| hCoV-19/Mexico/PUE-IBT-IMSS-754/2021 | EPI_ISL_1416573 | 10/03/21 | North America / Mexico / Puebla              | Human | Female | 38 | Ambulatory   |
| hCoV-19/Mexico/PUE-IBT-IMSS-755/2021 | EPI_ISL_1416574 | 09/03/21 | North America / Mexico / Puebla              | Human | Male   | 68 | Ambulatory   |
| hCoV-19/Mexico/PUE-IBT-IMSS-756/2021 | EPI_ISL_1416575 | 08/03/21 | North America / Mexico / Puebla              | Human | Male   | 49 | Ambulatory   |
| hCoV-19/Mexico/PUE-IBT-IMSS-758/2021 | EPI_ISL_1416576 | 09/03/21 | North America / Mexico / Puebla              | Human | Female | 53 | Ambulatory   |
| hCoV-19/Mexico/PUE-IBT-IMSS-759/2021 | EPI_ISL_1416577 | 09/03/21 | North America / Mexico / Puebla              | Human | Female | 41 | Ambulatory   |
| hCoV-19/Mexico/PUE-IBT-IMSS-760/2021 | EPI_ISL_1416578 | 09/03/21 | North America / Mexico / Puebla              | Human | Female | 43 | Ambulatory   |
| hCoV-19/Mexico/PUE-IBT-IMSS-761/2021 | EPI_ISL_1416579 | 09/03/21 | North America / Mexico / Puebla              | Human | Female | 40 | Ambulatory   |
| hCoV-19/Mexico/PUE-IBT-IMSS-763/2021 | EPI_ISL_1416581 | 10/03/21 | North America / Mexico / Puebla              | Human | Male   | 56 | Ambulatory   |
| hCoV-19/Mexico/PUE-IBT-IMSS-764/2021 | EPI_ISL_1416582 | 10/03/21 | North America / Mexico / Puebla              | Human | Female | 25 | Ambulatory   |
| hCoV-19/Mexico/CMX-IBT-IMSS-766/2021 | EPI_ISL_1416584 | 07/03/21 | North America / Mexico / Mexico City         | Human | Female | 73 | Hospitalized |
| hCoV-19/Mexico/CMX-IBT-IMSS-767/2021 | EPI_ISL_1416585 | 07/03/21 | North America / Mexico / Mexico City         | Human | Male   | 69 | Ambulatory   |
| hCoV-19/Mexico/CMX-IBT-IMSS-769/2021 | EPI_ISL_1416586 | 07/03/21 | North America / Mexico / Mexico City         | Human | Female | 66 | Ambulatory   |
| hCoV-19/Mexico/CMX-IBT-IMSS-770/2021 | EPI_ISL_1416587 | 07/03/21 | North America / Mexico / Mexico City         | Human | Male   | 40 | Hospitalized |
| hCoV-19/Mexico/MEX-IBT-IMSS-771/2021 | EPI_ISL_1416588 | 11/03/21 | North America / Mexico / State of Mexico     | Human | Male   | 48 | Ambulatory   |
| hCoV-19/Mexico/CMX-IBT-IMSS-772/2021 | EPI_ISL_1416589 | 07/03/21 | North America / Mexico / Mexico City         | Human | Female | 67 | Hospitalized |
| hCoV-19/Mexico/CMX-IBT-IMSS-773/2021 | EPI_ISL_1416590 | 07/03/21 | North America / Mexico / Mexico City         | Human | Male   | 64 | Ambulatory   |
| hCoV-19/Mexico/MEX-IBT-IMSS-774/2021 | EPI_ISL_1416591 | 12/03/21 | North America / Mexico / State of Mexico     | Human | Female | 88 | Hospitalized |
| hCoV-19/Mexico/CMX-IBT-IMSS-775/2021 | EPI_ISL_1416592 | 07/03/21 | North America / Mexico / Mexico City         | Human | Female | 73 | Hospitalized |
| hCoV-19/Mexico/CMX-IBT-IMSS-776/2021 | EPI_ISL_1416593 | 07/03/21 | North America / Mexico / Mexico City         | Human | Male   | 18 | Hospitalized |
| hCoV-19/Mexico/BCS-IBT-IMSS-777/2021 | EPI_ISL_1416594 | 10/03/21 | North America / Mexico / Baja California Sur | Human | Male   | 43 | Ambulatory   |
| hCoV-19/Mexico/VER-IBT-IMSS-779/2021 | EPI_ISL_1416595 | 09/03/21 | North America / Mexico / Veracruz            | Human | Female | 56 | Ambulatory   |
| hCoV-19/Mexico/QUE-IBT-IMSS-782/2021 | EPI_ISL_1416596 | 06/03/21 | North America / Mexico / Queretaro           | Human | Female | 30 | Ambulatory   |
| hCoV-19/Mexico/QUE-IBT-IMSS-783/2021 | EPI_ISL_1416597 | 06/03/21 | North America / Mexico / Queretaro           | Human | Male   | 1  | Ambulatory   |
| hCoV-19/Mexico/MEX-IBT-IMSS-784/2021 | EPI_ISL_1416598 | 10/03/21 | North America / Mexico / State of Mexico     | Human | Female | 26 | Ambulatory   |
| hCoV-19/Mexico/BCS-IBT-IMSS-785/2021 | EPI_ISL_1416599 | 10/03/21 | North America / Mexico / Baja California Sur | Human | Male   | 58 | Ambulatory   |
| hCoV-19/Mexico/PUE-IBT-IMSS-787/2021 | EPI_ISL_1416601 | 10/03/21 | North America / Mexico / Puebla              | Human | Male   | 50 | Ambulatory   |
| hCoV-19/Mexico/PUE-IBT-IMSS-790/2021 | EPI_ISL_1416602 | 10/03/21 | North America / Mexico / Puebla              | Human | Female | 31 | Ambulatory   |
| hCoV-19/Mexico/PUE-IBT-IMSS-791/2021 | EPI_ISL_1416603 | 10/03/21 | North America / Mexico / Puebla              | Human | Male   | 38 | Ambulatory   |
| hCoV-19/Mexico/PUE-IBT-IMSS-792/2021 | EPI_ISL_1416604 | 11/03/21 | North America / Mexico / Puebla              | Human | Male   | 28 | Ambulatory   |
| hCoV-19/Mexico/PUE-IBT-IMSS-793/2021 | EPI_ISL_1416605 | 10/03/21 | North America / Mexico / Puebla              | Human | Female | 42 | Ambulatory   |
| hCoV-19/Mexico/PUE-IBT-IMSS-794/2021 | EPI_ISL_1416606 | 11/03/21 | North America / Mexico / Puebla              | Human | Male   | 25 | Ambulatory   |
| hCoV-19/Mexico/PUE-IBT-IMSS-795/2021 | EPI_ISL_1416607 | 10/03/21 | North America / Mexico / Puebla              | Human | Male   | 51 | Ambulatory   |
| hCoV-19/Mexico/PUE-IBT-IMSS-798/2021 | EPI_ISL_1416608 | 10/03/21 | North America / Mexico / Puebla              | Human | Male   | 61 | Ambulatory   |
| hCoV-19/Mexico/PUE-IBT-IMSS-799/2021 | EPI_ISL_1416609 | 11/03/21 | North America / Mexico / Puebla              | Human | Female | 31 | Ambulatory   |
| hCoV-19/Mexico/PUE-IBT-IMSS-801/2021 | EPI_ISL_1416610 | 11/03/21 | North America / Mexico / Puebla              | Human | Male   | 25 | Ambulatory   |
| hCoV-19/Mexico/PUE-IBT-IMSS-804/2021 | EPI_ISL_1416613 | 10/03/21 | North America / Mexico / Puebla              | Human | Male   | 25 | Ambulatory   |
| hCoV-19/Mexico/VER-IBT-IMSS-806/2021 | EPI_ISL_1416614 | 09/03/21 | North America / Mexico / Veracruz            | Human | Male   | 37 | Ambulatory   |
| hCoV-19/Mexico/VER-IBT-IMSS-807/2021 | EPI_ISL_1416615 | 09/03/21 | North America / Mexico / Veracruz            | Human | Female | 66 | Hospitalized |
| hCoV-19/Mexico/PUE-IBT-IMSS-808/2021 | EPI_ISL_1416616 | 10/03/21 | North America / Mexico / Puebla              | Human | Female | 57 | Ambulatory   |
| hCoV-19/Mexico/PUE-IBT-IMSS-809/2021 | EPI_ISL_1416617 | 11/03/21 | North America / Mexico / Puebla              | Human | Male   | 29 | Ambulatory   |
| hCoV-19/Mexico/PUE-IBT-IMSS-810/2021 | EPI_ISL_1416618 | 08/03/21 | North America / Mexico / Puebla              | Human | Male   | 80 | Hospitalized |
| hCoV-19/Mexico/GRO-IBT-IMSS-812/2021 | EPI_ISL_1416619 | 08/03/21 | North America / Mexico / Guerrero            | Human | Female | 51 | Ambulatory   |
| hCoV-19/Mexico/PUE-IBT-IMSS-813/2021 | EPI_ISL_1416620 | 08/03/21 | North America / Mexico / Puebla              | Human | Male   | 61 | Hospitalized |
| hCoV-19/Mexico/OAX-IBT-IMSS-814/2021 | EPI_ISL_1416621 | 08/03/21 | North America / Mexico / Oaxaca              | Human | Female | 64 | Hospitalized |

|                                      |                 |          |                                          |       |        |    |              |
|--------------------------------------|-----------------|----------|------------------------------------------|-------|--------|----|--------------|
| hCoV-19/Mexico/PUE-IBT-IMSS-815/2021 | EPI_ISL_1416622 | 09/03/21 | North America / Mexico / Puebla          | Human | Male   | 73 | Hospitalized |
| hCoV-19/Mexico/PUE-IBT-IMSS-816/2021 | EPI_ISL_1416623 | 04/03/21 | North America / Mexico / Puebla          | Human | Male   | 52 | Hospitalized |
| hCoV-19/Mexico/PUE-IBT-IMSS-817/2021 | EPI_ISL_1416624 | 10/03/21 | North America / Mexico / Puebla          | Human | Female | 52 | Hospitalized |
| hCoV-19/Mexico/PUE-IBT-IMSS-818/2021 | EPI_ISL_1416625 | 11/03/21 | North America / Mexico / Puebla          | Human | Female | 73 | Hospitalized |
| hCoV-19/Mexico/PUE-IBT-IMSS-819/2021 | EPI_ISL_1416626 | 11/03/21 | North America / Mexico / Puebla          | Human | Male   | 34 | Hospitalized |
| hCoV-19/Mexico/PUE-IBT-IMSS-821/2021 | EPI_ISL_1416627 | 11/03/21 | North America / Mexico / Puebla          | Human | Male   | 28 | Ambulatory   |
| hCoV-19/Mexico/SLP-IBT-IMSS-822/2021 | EPI_ISL_1416628 | 08/03/21 | North America / Mexico / San Luis Potosi | Human | Female | 67 | Hospitalized |
| hCoV-19/Mexico/MEX-IBT-IMSS-823/2021 | EPI_ISL_1416629 | 12/03/21 | North America / Mexico / State of Mexico | Human | Female | 47 | Hospitalized |
| hCoV-19/Mexico/GRO-IBT-IMSS-824/2021 | EPI_ISL_1416630 | 06/03/21 | North America / Mexico / Guerrero        | Human | Male   | 45 | Hospitalized |
| hCoV-19/Mexico/CHP-IBT-IMSS-825/2021 | EPI_ISL_1416631 | 06/03/21 | North America / Mexico / Chiapas         | Human | Male   | 56 | Ambulatory   |
| hCoV-19/Mexico/MEX-IBT-IMSS-826/2021 | EPI_ISL_1416632 | 13/03/21 | North America / Mexico / State of Mexico | Human | Female | 42 | Hospitalized |
| hCoV-19/Mexico/CMX-IBT-IMSS-827/2021 | EPI_ISL_1416633 | 07/03/21 | North America / Mexico / Mexico City     | Human | Male   | 67 | Hospitalized |
| hCoV-19/Mexico/CMX-IBT-IMSS-829/2021 | EPI_ISL_1416634 | 07/03/21 | North America / Mexico / Mexico City     | Human | Male   | 64 | Hospitalized |
| hCoV-19/Mexico/QUE-IBT-IMSS-830/2021 | EPI_ISL_1416635 | 06/03/21 | North America / Mexico / Queretaro       | Human | Male   | 40 | Ambulatory   |
| hCoV-19/Mexico/QUE-IBT-IMSS-831/2021 | EPI_ISL_1416636 | 06/03/21 | North America / Mexico / Queretaro       | Human | Male   | 32 | Ambulatory   |
| hCoV-19/Mexico/QUE-IBT-IMSS-832/2021 | EPI_ISL_1416637 | 06/03/21 | North America / Mexico / Queretaro       | Human | Female | 58 | Hospitalized |
| hCoV-19/Mexico/MOR-IBT-IMSS-834/2021 | EPI_ISL_1416639 | 09/03/21 | North America / Mexico / Morelos         | Human | Female | 49 | Hospitalized |
| hCoV-19/Mexico/VER-IBT-IMSS-835/2021 | EPI_ISL_1416640 | 09/03/21 | North America / Mexico / Veracruz        | Human | Female | 42 | Ambulatory   |
| hCoV-19/Mexico/VER-IBT-IMSS-836/2021 | EPI_ISL_1416641 | 09/03/21 | North America / Mexico / Veracruz        | Human | Female | 36 | Ambulatory   |
| hCoV-19/Mexico/VER-IBT-IMSS-838/2021 | EPI_ISL_1416642 | 09/03/21 | North America / Mexico / Veracruz        | Human | Female | 49 | Hospitalized |
| hCoV-19/Mexico/VER-IBT-IMSS-842/2021 | EPI_ISL_1416643 | 09/03/21 | North America / Mexico / Veracruz        | Human | Female | 53 | Hospitalized |
| hCoV-19/Mexico/VER-IBT-IMSS-843/2021 | EPI_ISL_1416644 | 09/03/21 | North America / Mexico / Veracruz        | Human | Female | 66 | Hospitalized |
| hCoV-19/Mexico/VER-IBT-IMSS-844/2021 | EPI_ISL_1416645 | 09/03/21 | North America / Mexico / Veracruz        | Human | Male   | 55 | Ambulatory   |
| hCoV-19/Mexico/CMX-IBT-IMSS-845/2021 | EPI_ISL_1416646 | 07/03/21 | North America / Mexico / Mexico City     | Human | Male   | 26 | Ambulatory   |
| hCoV-19/Mexico/MEX-IBT-IMSS-848/2021 | EPI_ISL_1416648 | 13/03/21 | North America / Mexico / State of Mexico | Human | Male   | 55 | Hospitalized |
| hCoV-19/Mexico/MEX-IBT-IMSS-850/2021 | EPI_ISL_1416650 | 13/03/21 | North America / Mexico / State of Mexico | Human | Male   | 60 | Hospitalized |
| hCoV-19/Mexico/CMX-IBT-IMSS-851/2021 | EPI_ISL_1416651 | 07/03/21 | North America / Mexico / Mexico City     | Human | Male   | 83 | Hospitalized |
| hCoV-19/Mexico/CMX-IBT-IMSS-852/2021 | EPI_ISL_1416652 | 07/03/21 | North America / Mexico / Mexico City     | Human | Male   | 69 | Hospitalized |
| hCoV-19/Mexico/CMX-IBT-IMSS-853/2021 | EPI_ISL_1416653 | 07/03/21 | North America / Mexico / Mexico City     | Human | Male   | 48 | Ambulatory   |
| hCoV-19/Mexico/CMX-IBT-IMSS-854/2021 | EPI_ISL_1416654 | 07/03/21 | North America / Mexico / Mexico City     | Human | Male   | 82 | Hospitalized |
| hCoV-19/Mexico/MEX-IBT-IMSS-855/2021 | EPI_ISL_1416655 | 05/03/21 | North America / Mexico / State of Mexico | Human | Female | 82 | Hospitalized |
| hCoV-19/Mexico/CMX-IBT-IMSS-856/2021 | EPI_ISL_1416656 | 07/03/21 | North America / Mexico / Mexico City     | Human | Female | 38 | Hospitalized |
| hCoV-19/Mexico/CMX-IBT-IMSS-858/2021 | EPI_ISL_1416657 | 07/03/21 | North America / Mexico / Mexico City     | Human | Male   | 74 | Hospitalized |
| hCoV-19/Mexico/CMX-IBT-IMSS-859/2021 | EPI_ISL_1416658 | 07/03/21 | North America / Mexico / Mexico City     | Human | Male   | 80 | Hospitalized |
| hCoV-19/Mexico/CMX-IBT-IMSS-860/2021 | EPI_ISL_1416659 | 07/03/21 | North America / Mexico / Mexico City     | Human | Female | 65 | Hospitalized |
| hCoV-19/Mexico/CMX-IBT-IMSS-861/2021 | EPI_ISL_1416660 | 07/03/21 | North America / Mexico / Mexico City     | Human | Male   | 63 | Hospitalized |
| hCoV-19/Mexico/CMX-IBT-IMSS-862/2021 | EPI_ISL_1416661 | 07/03/21 | North America / Mexico / Mexico City     | Human | Female | 75 | Hospitalized |
| hCoV-19/Mexico/VER-IBT-IMSS-864/2021 | EPI_ISL_1416663 | 09/03/21 | North America / Mexico / Veracruz        | Human | Female | 77 | Hospitalized |
| hCoV-19/Mexico/HID-IBT-IMSS-865/2021 | EPI_ISL_1416664 | 09/03/21 | North America / Mexico / Hidalgo         | Human | Male   | 79 | Hospitalized |
| hCoV-19/Mexico/HID-IBT-IMSS-866/2021 | EPI_ISL_1416665 | 09/03/21 | North America / Mexico / Hidalgo         | Human | Male   | 61 | Hospitalized |
| hCoV-19/Mexico/HID-IBT-IMSS-867/2021 | EPI_ISL_1416666 | 09/03/21 | North America / Mexico / Hidalgo         | Human | Male   | 61 | Hospitalized |
| hCoV-19/Mexico/CMX-IBT-IMSS-870/2021 | EPI_ISL_1416668 | 07/03/21 | North America / Mexico / Mexico City     | Human | Male   | 74 | Hospitalized |
| hCoV-19/Mexico/MEX-IBT-IMSS-871/2021 | EPI_ISL_1416669 | 13/03/21 | North America / Mexico / State of Mexico | Human | Male   | 71 | Ambulatory   |
| hCoV-19/Mexico/MEX-IBT-IMSS-872/2021 | EPI_ISL_1416670 | 14/03/21 | North America / Mexico / State of Mexico | Human | Female | 60 | Hospitalized |

|                                            |                 |          |                                          |       |        |    |              |                    |
|--------------------------------------------|-----------------|----------|------------------------------------------|-------|--------|----|--------------|--------------------|
| hCoV-19/Mexico/MEX-IBT-IMSS-873/2021       | EPI_ISL_1416671 | 12/03/21 | North America / Mexico / State of Mexico | Human | Male   | 84 | Hospitalized |                    |
| hCoV-19/Mexico/CMX-IBT-IMSS-874/2021       | EPI_ISL_1416672 | 07/03/21 | North America / Mexico / Mexico City     | Human | Female | 61 | Hospitalized |                    |
| hCoV-19/Mexico/MOR-IBT-IMSS-875/2021       | EPI_ISL_1416673 | 09/03/21 | North America / Mexico / Morelos         | Human | Male   | 68 | Hospitalized |                    |
| hCoV-19/Mexico/MOR-IBT-IMSS-876/2021       | EPI_ISL_1416674 | 09/03/21 | North America / Mexico / Morelos         | Human | Male   | 65 | Hospitalized |                    |
| hCoV-19/Mexico/MOR-IBT-IMSS-878/2021       | EPI_ISL_1416675 | 09/03/21 | North America / Mexico / Morelos         | Human | Female | 27 | Ambulatory   |                    |
| hCoV-19/Mexico/CMX-IBT-IMSS-880/2021       | EPI_ISL_1416677 | 07/03/21 | North America / Mexico / Mexico City     | Human | Female | 62 | Ambulatory   |                    |
| hCoV-19/Mexico/MEX-IBT-IMSS-881/2021       | EPI_ISL_1416678 | 15/03/21 | North America / Mexico / State of Mexico | Human | Female | 36 | Hospitalized |                    |
| hCoV-19/Mexico/MEX-IBT-IMSS-882/2021       | EPI_ISL_1416679 | 13/03/21 | North America / Mexico / State of Mexico | Human | Male   | 64 | Hospitalized |                    |
| hCoV-19/Mexico/MEX-IBT-IMSS-883/2021       | EPI_ISL_1416680 | 12/03/21 | North America / Mexico / State of Mexico | Human | Male   | 36 | Hospitalized |                    |
| hCoV-19/Mexico/MEX-IBT-IMSS-884/2021       | EPI_ISL_1416681 | 13/03/21 | North America / Mexico / State of Mexico | Human | Male   | 79 | Hospitalized |                    |
| hCoV-19/Mexico/MEX-IBT-IMSS-885/2021       | EPI_ISL_1416682 | 15/03/21 | North America / Mexico / State of Mexico | Human | Male   | 74 | Hospitalized |                    |
| hCoV-19/Mexico/CMX-INMEGEN-03-09-94/2021   | EPI_ISL_1416873 | 16/03/21 | North America / Mexico / Mexico City     | Human | Male   | 26 | unknown      |                    |
| hCoV-19/Mexico/CMX-INMEGEN-03-09-95/2021   | EPI_ISL_1417442 | 16/03/21 | North America / Mexico / Mexico City     | Human | Male   | 32 | unknown      |                    |
| hCoV-19/Mexico/CMX-INER-INMEGEN-00004/2021 | EPI_ISL_1423994 | 25/02/21 | North America / Mexico / Mexico City     | Human | Female | 10 | unknown      |                    |
| hCoV-19/Mexico/CMX-INER-INMEGEN-00007/2021 | EPI_ISL_1423995 | 26/02/21 | North America / Mexico / Mexico City     | Human | Male   | 12 | unknown      |                    |
| hCoV-19/Mexico/CMX-INER-INMEGEN-00019/2021 | EPI_ISL_1423996 | 03/03/21 | North America / Mexico / Mexico City     | Human | Female | 23 | unknown      |                    |
| hCoV-19/Mexico/CMX-INER-INMEGEN-00029/2021 | EPI_ISL_1423997 | 03/03/21 | North America / Mexico / Mexico City     | Human | Female | 35 | unknown      |                    |
| hCoV-19/Mexico/CMX-INER-INMEGEN-00049/2021 | EPI_ISL_1424001 | 20/02/21 | North America / Mexico / Mexico City     | Human | Female | 58 | unknown      |                    |
| hCoV-19/Mexico/YUC-InDRE_F9948_S805/2021   | EPI_ISL_1424007 | 15/02/21 | North America / Mexico / Yucatan         | Human | Male   | 42 | Released     | Oropharyngeal swab |
| hCoV-19/Mexico/HID-InDRE_F10300_S806/2021  | EPI_ISL_1424008 | 20/02/21 | North America / Mexico / Hidalgo         | Human | Female | 48 | Released     | Oropharyngeal swab |
| hCoV-19/Mexico/HID-InDRE_F10309_S807/2021  | EPI_ISL_1424009 | 18/02/21 | North America / Mexico / Hidalgo         | Human | Male   | 84 | Deceased     | Oropharyngeal swab |
| hCoV-19/Mexico/GUA-InDRE_F10343_S809/2021  | EPI_ISL_1424011 | 16/02/21 | North America / Mexico / Guanajuato      | Human | Male   | 57 | Hospitalized | Oropharyngeal swab |
| hCoV-19/Mexico/YUC-InDRE_F10541_S812/2021  | EPI_ISL_1424014 | 21/02/21 | North America / Mexico / Yucatan         | Human | Male   | 31 | Released     | Oropharyngeal swab |
| hCoV-19/Mexico/QUE-InDRE_F10593_S814/2021  | EPI_ISL_1424016 | 18/02/21 | North America / Mexico / Queretaro       | Human | Male   | 17 | Released     | Oropharyngeal swab |
| hCoV-19/Mexico/MOR-InDRE_F10634_S815/2021  | EPI_ISL_1424017 | 16/02/21 | North America / Mexico / Morelos         | Human | Female | 25 | Released     | Oropharyngeal swab |
| hCoV-19/Mexico/MOR-InDRE_F10665_S816/2021  | EPI_ISL_1424018 | 21/02/21 | North America / Mexico / Morelos         | Human | Male   | 44 | Hospitalized | Oropharyngeal swab |
| hCoV-19/Mexico/VER-InDRE_F10671_S817/2021  | EPI_ISL_1424019 | 17/02/21 | North America / Mexico / Veracruz        | Human | Female | 62 | Released     | Oropharyngeal swab |
| hCoV-19/Mexico/MOR-InDRE_F10934_S818/2021  | EPI_ISL_1424020 | 24/02/21 | North America / Mexico / Morelos         | Human | Male   | 53 | Released     | Oropharyngeal swab |
| hCoV-19/Mexico/CHH-InDRE_F11012_S819/2021  | EPI_ISL_1424021 | 23/02/21 | North America / Mexico / Chiapas         | Human | Male   | 43 | Released     | Oropharyngeal swab |
| hCoV-19/Mexico/QUE-InDRE_F11013_S820/2021  | EPI_ISL_1424022 | 25/02/21 | North America / Mexico / Queretaro       | Human | Female | 53 | Hospitalized | Oropharyngeal swab |
| hCoV-19/Mexico/QUE-InDRE_F11015_S821/2021  | EPI_ISL_1424023 | 25/02/21 | North America / Mexico / Queretaro       | Human | Female | 39 | Released     | Oropharyngeal swab |
| hCoV-19/Mexico/QUE-InDRE_F11027_S822/2021  | EPI_ISL_1424024 | 28/02/21 | North America / Mexico / Queretaro       | Human | Female | 78 | Released     | Oropharyngeal swab |
| hCoV-19/Mexico/QUE-InDRE_F11019_S824/2021  | EPI_ISL_1424026 | 26/02/21 | North America / Mexico / Queretaro       | Human | Female | 36 | Released     | Oropharyngeal swab |
| hCoV-19/Mexico/QUE-InDRE_F11020_S825/2021  | EPI_ISL_1424027 | 26/02/21 | North America / Mexico / Queretaro       | Human | Male   | 43 | Released     | Oropharyngeal swab |
| hCoV-19/Mexico/QUE-InDRE_F11022_S826/2021  | EPI_ISL_1424028 | 26/02/21 | North America / Mexico / Queretaro       | Human | Female | 47 | Released     | Oropharyngeal swab |
| hCoV-19/Mexico/QUE-InDRE_F11023_S827/2021  | EPI_ISL_1424029 | 26/02/21 | North America / Mexico / Queretaro       | Human | Male   | 50 | Hospitalized | Oropharyngeal swab |
| hCoV-19/Mexico/QUE-InDRE_F11024_S828/2021  | EPI_ISL_1424030 | 27/02/21 | North America / Mexico / Queretaro       | Human | Male   | 49 | Released     | Oropharyngeal swab |
| hCoV-19/Mexico/QUE-InDRE_F11025_S829/2021  | EPI_ISL_1424031 | 27/02/21 | North America / Mexico / Queretaro       | Human | Female | 20 | Released     | Oropharyngeal swab |
| hCoV-19/Mexico/QUE-InDRE_F11016_S830/2021  | EPI_ISL_1424032 | 25/02/21 | North America / Mexico / Queretaro       | Human | Male   | 62 | Hospitalized | Oropharyngeal swab |
| hCoV-19/Mexico/QUE-InDRE_F11028_S831/2021  | EPI_ISL_1424033 | 28/02/21 | North America / Mexico / Queretaro       | Human | Female | 25 | Released     | Oropharyngeal swab |
| hCoV-19/Mexico/GUA-InDRE_F11032_S832/2021  | EPI_ISL_1424034 | 01/03/21 | North America / Mexico / Guanajuato      | Human | Male   | 84 | Hospitalized | Oropharyngeal swab |
| hCoV-19/Mexico/YUC-InDRE_F11038_S833/2021  | EPI_ISL_1424035 | 01/03/21 | North America / Mexico / Yucatan         | Human | Male   | 36 | Released     | Oropharyngeal swab |
| hCoV-19/Mexico/YUC-InDRE_F11042_S834/2021  | EPI_ISL_1424036 | 01/03/21 | North America / Mexico / Yucatan         | Human | Male   | 62 | Released     | Oropharyngeal swab |
| hCoV-19/Mexico/YUC-InDRE_F11043_S835/2021  | EPI_ISL_1424037 | 01/03/21 | North America / Mexico / Yucatan         | Human | Male   | 39 | Released     | Oropharyngeal swab |

|                                           |                 |          |                                                    |       |         |         |              |                    |
|-------------------------------------------|-----------------|----------|----------------------------------------------------|-------|---------|---------|--------------|--------------------|
| hCoV-19/Mexico/TAM-InDRE_F11058_S837/2021 | EPI_ISL_1424039 | 18/02/21 | North America / Mexico / Tamaulipas                | Human | Female  | 31      | Released     | Oropharyngeal swab |
| hCoV-19/Mexico/TAM-InDRE_F11059_S838/2021 | EPI_ISL_1424040 | 19/02/21 | North America / Mexico / Tamaulipas                | Human | Male    | 36      | Released     | Oropharyngeal swab |
| hCoV-19/Mexico/TAM-InDRE_F11060_S839/2021 | EPI_ISL_1424041 | 23/02/21 | North America / Mexico / Tamaulipas                | Human | Male    | 64      | Released     | Oropharyngeal swab |
| hCoV-19/Mexico/MOR-InDRE_F11061_S840/2021 | EPI_ISL_1424042 | 25/02/21 | North America / Mexico / Morelos                   | Human | Male    | 85      | Deceased     | Oropharyngeal swab |
| hCoV-19/Mexico/GRO-InDRE_F11063_S841/2021 | EPI_ISL_1424043 | 24/02/21 | North America / Mexico / Guerrero                  | Human | Male    | 67      | Deceased     | Oropharyngeal swab |
| hCoV-19/Mexico/VER-InDRE_F11084_S845/2021 | EPI_ISL_1424046 | 19/02/21 | North America / Mexico / Veracruz                  | Human | Female  | 70      | Hospitalized | Oropharyngeal swab |
| hCoV-19/Mexico/VER-InDRE_F11087_S846/2021 | EPI_ISL_1424047 | 24/02/21 | North America / Mexico / Veracruz                  | Human | Male    | 60      | Hospitalized | Oropharyngeal swab |
| hCoV-19/Mexico/VER-InDRE_F11090_S847/2021 | EPI_ISL_1424048 | 24/02/21 | North America / Mexico / Veracruz                  | Human | Female  | 71      | Released     | Oropharyngeal swab |
| hCoV-19/Mexico/VER-InDRE_F11093_S848/2021 | EPI_ISL_1424049 | 25/02/21 | North America / Mexico / Veracruz                  | Human | Female  | 50      | Released     | Oropharyngeal swab |
| hCoV-19/Mexico/BCN-InDRE_F11110_S849/2021 | EPI_ISL_1424050 | 28/02/21 | North America / Mexico / Baja California           | Human | Male    | 27      | Released     | Oropharyngeal swab |
| hCoV-19/Mexico/CMX-InDRE_F11123_S851/2021 | EPI_ISL_1424052 | 24/02/21 | North America / Mexico / Mexico City               | Human | Male    | 57      | Hospitalized | Oropharyngeal swab |
| hCoV-19/Mexico/CMX-InDRE_F11124_S852/2021 | EPI_ISL_1424053 | 25/02/21 | North America / Mexico / Mexico City               | Human | Male    | 48      | Hospitalized | Oropharyngeal swab |
| hCoV-19/Mexico/BCN-SEARCH-8268/2021       | EPI_ISL_1468958 | 03/03/21 | North America / Mexico / Baja California / Tijuana | Human | unknown | unknown | unknown      | Nasal swab         |
| hCoV-19/Mexico/SLP_UASLP_A019/2021        | EPI_ISL_1469110 | 21/01/21 | North America / Mexico / San Luis Potosi           | Human | Male    | 37      | Released     | Oropharyngeal swab |
| hCoV-19/Mexico/SLP_UASLP_A007/2021        | EPI_ISL_1469117 | 20/01/21 | North America / Mexico / San Luis Potosi           | Human | Female  | 40      | Hospitalized | Oropharyngeal swab |
| hCoV-19/Mexico/SLP_UASLP_A009/2021        | EPI_ISL_1469119 | 20/01/21 | North America / Mexico / San Luis Potosi           | Human | Female  | 44      | Released     | Oropharyngeal swab |
| hCoV-19/Mexico/SIN-CIAD-HJ1154/2021       | EPI_ISL_1482628 | 25/02/21 | North America / Mexico / Sinaloa                   | Human | Female  | 62      | unknown      | Oropharyngeal swab |
| hCoV-19/Mexico/SIN-CIAD-S6311/2021        | EPI_ISL_1482629 | 17/03/21 | North America / Mexico / Sinaloa                   | Human | Male    | 33      | unknown      | Oropharyngeal swab |
| hCoV-19/Mexico/SIN-CIAD-S6325/2021        | EPI_ISL_1482630 | 18/03/21 | North America / Mexico / Sinaloa                   | Human | Female  | 38      | unknown      | Oropharyngeal swab |
| hCoV-19/Mexico/SIN-CIAD-S6373/2021        | EPI_ISL_1482631 | 23/03/21 | North America / Mexico / Sinaloa                   | Human | Female  | 41      | unknown      | Oropharyngeal swab |
| hCoV-19/Mexico/NLE-InDRE_F11678_S926/2021 | EPI_ISL_1483032 | 08/03/21 | North America / Mexico / Nuevo Leon                | Human | Female  | 80      | Released     | Oropharyngeal swab |
| hCoV-19/Mexico/NLE-InDRE_F11680_S927/2021 | EPI_ISL_1483033 | 08/03/21 | North America / Mexico / Nuevo Leon                | Human | Female  | 50      | Released     | Oropharyngeal swab |
| hCoV-19/Mexico/NLE-InDRE_F11683_S928/2021 | EPI_ISL_1483034 | 09/03/21 | North America / Mexico / Nuevo Leon                | Human | Male    | 36      | Released     | Oropharyngeal swab |
| hCoV-19/Mexico/NLE-InDRE_F11684_S929/2021 | EPI_ISL_1483035 | 09/03/21 | North America / Mexico / Nuevo Leon                | Human | Female  | 17      | Released     | Oropharyngeal swab |
| hCoV-19/Mexico/NLE-InDRE_F11685_S930/2021 | EPI_ISL_1483036 | 11/03/21 | North America / Mexico / Nuevo Leon                | Human | Male    | 11      | Released     | Oropharyngeal swab |
| hCoV-19/Mexico/NLE-InDRE_F11686_S931/2021 | EPI_ISL_1483037 | 11/03/21 | North America / Mexico / Nuevo Leon                | Human | Female  | 28      | Released     | Oropharyngeal swab |
| hCoV-19/Mexico/YUC-InDRE_F11698_S932/2021 | EPI_ISL_1483038 | 14/03/21 | North America / Mexico / Yucatan                   | Human | Female  | 41      | Released     | Oropharyngeal swab |
| hCoV-19/Mexico/YUC-InDRE_F11702_S933/2021 | EPI_ISL_1483039 | 14/03/21 | North America / Mexico / Yucatan                   | Human | Female  | 86      | Hospitalized | Oropharyngeal swab |
| hCoV-19/Mexico/NAY-InDRE_F11703_S934/2021 | EPI_ISL_1483040 | 12/03/21 | North America / Mexico / Nayarit                   | Human | Male    | 95      | Deceased     | Oropharyngeal swab |
| hCoV-19/Mexico/NAY-InDRE_F11704_S935/2021 | EPI_ISL_1483041 | 10/03/21 | North America / Mexico / Nayarit                   | Human | Male    | 66      | Released     | Oropharyngeal swab |
| hCoV-19/Mexico/SIN-InDRE_F11705_S936/2021 | EPI_ISL_1483042 | 09/03/21 | North America / Mexico / Sinaloa                   | Human | Male    | 63      | Hospitalized | Oropharyngeal swab |
| hCoV-19/Mexico/SIN-InDRE_F11707_S937/2021 | EPI_ISL_1483043 | 11/03/21 | North America / Mexico / Sinaloa                   | Human | Female  | 21      | Released     | Oropharyngeal swab |
| hCoV-19/Mexico/QUE-InDRE_F11713_S938/2021 | EPI_ISL_1483044 | 11/03/21 | North America / Mexico / Queretaro                 | Human | Female  | 28      | Released     | Oropharyngeal swab |
| hCoV-19/Mexico/QUE-InDRE_F11716_S939/2021 | EPI_ISL_1483045 | 12/03/21 | North America / Mexico / Queretaro                 | Human | Female  | 44      | Released     | Oropharyngeal swab |
| hCoV-19/Mexico/QUE-InDRE_F11721_S940/2021 | EPI_ISL_1483046 | 12/03/21 | North America / Mexico / Queretaro                 | Human | Male    | 36      | Released     | Oropharyngeal swab |
| hCoV-19/Mexico/QUE-InDRE_F11722_S941/2021 | EPI_ISL_1483047 | 13/03/21 | North America / Mexico / Queretaro                 | Human | Female  | 65      | Hospitalized | Oropharyngeal swab |
| hCoV-19/Mexico/GUA-InDRE_F11723_S942/2021 | EPI_ISL_1483048 | 13/03/21 | North America / Mexico / Guanajuato                | Human | Male    | 55      | Released     | Oropharyngeal swab |
| hCoV-19/Mexico/QUE-InDRE_F11724_S943/2021 | EPI_ISL_1483049 | 12/03/21 | North America / Mexico / Queretaro                 | Human | Male    | 57      | Released     | Oropharyngeal swab |
| hCoV-19/Mexico/QUE-InDRE_F11735_S944/2021 | EPI_ISL_1483050 | 15/03/21 | North America / Mexico / Queretaro                 | Human | Male    | 20      | Released     | Oropharyngeal swab |
| hCoV-19/Mexico/VER-InDRE_F11484_S945/2021 | EPI_ISL_1483055 | 06/03/21 | North America / Mexico / Veracruz                  | Human | Male    | 88      | Hospitalized | Oropharyngeal swab |
| hCoV-19/Mexico/VER-InDRE_F11486_S946/2021 | EPI_ISL_1483056 | 01/03/21 | North America / Mexico / Veracruz                  | Human | Male    | 36      | Released     | Oropharyngeal swab |
| hCoV-19/Mexico/VER-InDRE_F11488_S947/2021 | EPI_ISL_1483057 | 06/03/21 | North America / Mexico / Veracruz                  | Human | Female  | 43      | Released     | Oropharyngeal swab |
| hCoV-19/Mexico/HID-InDRE_F11501_S948/2021 | EPI_ISL_1483058 | 07/03/21 | North America / Mexico / Hidalgo                   | Human | Female  | 75      | Deceased     | Oropharyngeal swab |
| hCoV-19/Mexico/PUE-InDRE_F11503_S949/2021 | EPI_ISL_1483059 | 08/03/21 | North America / Mexico / Puebla                    | Human | Male    | 37      | Live         | Oropharyngeal swab |



|                                           |                 |          |                                             |       |        |    |              |                    |
|-------------------------------------------|-----------------|----------|---------------------------------------------|-------|--------|----|--------------|--------------------|
| hCoV-19/Mexico/PUE-InDRE_F11504_S950/2021 | EPI_ISL_148306C | 08/03/21 | North America / Mexico / Puebla             | Human | Male   | 31 | Released     | Oropharyngeal swab |
| hCoV-19/Mexico/PUE-InDRE_F11505_S951/2021 | EPI_ISL_1483061 | 08/03/21 | North America / Mexico / Puebla             | Human | Female | 48 | Live         | Oropharyngeal swab |
| hCoV-19/Mexico/PUE-InDRE_F11506_S952/2021 | EPI_ISL_1483062 | 08/03/21 | North America / Mexico / Puebla             | Human | Female | 24 | Released     | Oropharyngeal swab |
| hCoV-19/Mexico/PUE-InDRE_F11508_S953/2021 | EPI_ISL_1483063 | 09/03/21 | North America / Mexico / Puebla             | Human | Female | 34 | Released     | Oropharyngeal swab |
| hCoV-19/Mexico/PUE-InDRE_F11509_S954/2021 | EPI_ISL_1483064 | 11/03/21 | North America / Mexico / Puebla             | Human | Female | 50 | Live         | Oropharyngeal swab |
| hCoV-19/Mexico/PUE-InDRE_F11510_S955/2021 | EPI_ISL_1483065 | 12/03/21 | North America / Mexico / Puebla             | Human | Male   | 67 | Hospitalized | Oropharyngeal swab |
| hCoV-19/Mexico/CAM-InDRE_F11511_S956/2021 | EPI_ISL_1483066 | 08/03/21 | North America / Mexico / Campeche           | Human | Male   | 69 | Hospitalized | Oropharyngeal swab |
| hCoV-19/Mexico/CAM-InDRE_F11513_S957/2021 | EPI_ISL_1483067 | 12/03/21 | North America / Mexico / Campeche           | Human | Male   | 60 | Hospitalized | Oropharyngeal swab |
| hCoV-19/Mexico/JAL-InDRE_F11516_S958/2021 | EPI_ISL_1483068 | 08/03/21 | North America / Mexico / Jalisco            | Human | Male   | 28 | Released     | Oropharyngeal swab |
| hCoV-19/Mexico/JAL-InDRE_F11517_S959/2021 | EPI_ISL_1483069 | 08/03/21 | North America / Mexico / Jalisco            | Human | Female | 42 | Released     | Oropharyngeal swab |
| hCoV-19/Mexico/JAL-InDRE_F11519_S960/2021 | EPI_ISL_148307C | 09/03/21 | North America / Mexico / Jalisco            | Human | Male   | 72 | Hospitalized | Oropharyngeal swab |
| hCoV-19/Mexico/JAL-InDRE_F11523_S961/2021 | EPI_ISL_1483071 | 10/03/21 | North America / Mexico / Jalisco            | Human | Male   | 68 | Hospitalized | Oropharyngeal swab |
| hCoV-19/Mexico/JAL-InDRE_F11524_S962/2021 | EPI_ISL_1483072 | 10/03/21 | North America / Mexico / Jalisco            | Human | Male   | 85 | Released     | Oropharyngeal swab |
| hCoV-19/Mexico/GRO-InDRE_F11640_S963/2021 | EPI_ISL_1483073 | 06/03/21 | North America / Mexico / Guerrero           | Human | Female | 74 | Deceased     | Oropharyngeal swab |
| hCoV-19/Mexico/CHH-InDRE_F11643_S964/2021 | EPI_ISL_1483074 | 05/03/21 | North America / Mexico / Chihuahua          | Human | Female | 54 | Released     | Oropharyngeal swab |
| hCoV-19/Mexico/SIN_CIAD_ID1979/2021       | EPI_ISL_1491362 | 19/03/21 | North America / Mexico / Sinaloa / Mazatlan | Human | Male   | 53 | unknown      | Oropharyngeal swab |
| hCoV-19/Mexico/CHH-InDRE_F11645_S965/2021 | EPI_ISL_1494626 | 07/03/21 | North America / Mexico / Chihuahua          | Human | Male   | 43 | Live         | Oropharyngeal swab |
| hCoV-19/Mexico/CHH-InDRE_F11650_S966/2021 | EPI_ISL_1494627 | 09/03/21 | North America / Mexico / Chihuahua          | Human | Female | 51 | Released     | Oropharyngeal swab |
| hCoV-19/Mexico/CHH-InDRE_F11653_S967/2021 | EPI_ISL_1494628 | 08/03/21 | North America / Mexico / Chihuahua          | Human | Female | 42 | Released     | Oropharyngeal swab |
| hCoV-19/Mexico/CHH-InDRE_F11659_S968/2021 | EPI_ISL_1494629 | 10/03/21 | North America / Mexico / Chihuahua          | Human | Male   | 79 | Hospitalized | Oropharyngeal swab |
| hCoV-19/Mexico/CHH-InDRE_F11661_S969/2021 | EPI_ISL_149463C | 08/03/21 | North America / Mexico / Chihuahua          | Human | Female | 41 | Live         | Oropharyngeal swab |
| hCoV-19/Mexico/NLE-InDRE_F11664_S970/2021 | EPI_ISL_1494631 | 08/03/21 | North America / Mexico / Nuevo Leon         | Human | Male   | 49 | Hospitalized | Oropharyngeal swab |
| hCoV-19/Mexico/NLE-InDRE_F11665_S971/2021 | EPI_ISL_1494632 | 05/03/21 | North America / Mexico / Nuevo Leon         | Human | Female | 66 | Released     | Oropharyngeal swab |
| hCoV-19/Mexico/NLE-InDRE_F11668_S972/2021 | EPI_ISL_1494633 | 09/03/21 | North America / Mexico / Nuevo Leon         | Human | Female | 54 | Hospitalized | Oropharyngeal swab |
| hCoV-19/Mexico/NLE-InDRE_F11669_S973/2021 | EPI_ISL_1494634 | 10/03/21 | North America / Mexico / Nuevo Leon         | Human | Male   | 41 | Released     | Oropharyngeal swab |
| hCoV-19/Mexico/NLE-InDRE_F11671_S974/2021 | EPI_ISL_1494635 | 10/03/21 | North America / Mexico / Nuevo Leon         | Human | Female | 62 | Released     | Oropharyngeal swab |
| hCoV-19/Mexico/CMX-InDRE_F34680_S975/2021 | EPI_ISL_1494636 | 17/03/21 | North America / Mexico / Mexico City        | Human | Male   | 56 | Released     | Oropharyngeal swab |
| hCoV-19/Mexico/CMX-InDRE_F34863_S976/2021 | EPI_ISL_1494637 | 18/03/21 | North America / Mexico / Mexico City        | Human | Female | 20 | Released     | Oropharyngeal swab |
| hCoV-19/Mexico/CMX-InDRE_F35831_S977/2021 | EPI_ISL_1494638 | 18/03/21 | North America / Mexico / Mexico City        | Human | Male   | 30 | released     | Oropharyngeal swab |
| hCoV-19/Mexico/CMX-InDRE_F34412_S978/2021 | EPI_ISL_1494639 | 16/03/21 | North America / Mexico / Mexico City        | Human | Female | 34 | Released     | Oropharyngeal swab |
| hCoV-19/Mexico/CMX-InDRE_F34822_S979/2021 | EPI_ISL_149464C | 16/03/21 | North America / Mexico / Mexico City        | Human | Female | 64 | Released     | Oropharyngeal swab |
| hCoV-19/Mexico/CMX-InDRE_F35419_S980/2021 | EPI_ISL_1494641 | 18/03/21 | North America / Mexico / Mexico City        | Human | Male   | 55 | Released     | Oropharyngeal swab |
| hCoV-19/Mexico/CMX-InDRE_F35724_S981/2021 | EPI_ISL_1494642 | 19/03/21 | North America / Mexico / Mexico City        | Human | Female | 32 | Released     | Oropharyngeal swab |
| hCoV-19/Mexico/CMX-InDRE_F34219_S982/2021 | EPI_ISL_1494643 | 16/03/21 | North America / Mexico / Mexico City        | Human | Male   | 33 | Released     | Oropharyngeal swab |
| hCoV-19/Mexico/CMX-InDRE_F34245_S983/2021 | EPI_ISL_1494644 | 16/03/21 | North America / Mexico / Mexico City        | Human | Female | 21 | Released     | Oropharyngeal swab |
| hCoV-19/Mexico/CMX-InDRE_F34262_S984/2021 | EPI_ISL_1494645 | 16/03/21 | North America / Mexico / Mexico City        | Human | Male   | 33 | Released     | Oropharyngeal swab |
| hCoV-19/Mexico/CMX-InDRE_F34264_S985/2021 | EPI_ISL_1494646 | 16/03/21 | North America / Mexico / Mexico City        | Human | Female | 30 | Released     | Oropharyngeal swab |
| hCoV-19/Mexico/CMX-InDRE_F34276_S986/2021 | EPI_ISL_1494647 | 16/03/21 | North America / Mexico / Mexico City        | Human | Female | 53 | Released     | Oropharyngeal swab |
| hCoV-19/Mexico/NLE-InDRE_F11674_S987/2021 | EPI_ISL_1494648 | 08/03/21 | North America / Mexico / Nuevo Leon         | Human | Male   | 62 | Released     | Oropharyngeal swab |
| hCoV-19/Mexico/NLE-InDRE_F11675_S988/2021 | EPI_ISL_1494649 | 08/03/21 | North America / Mexico / Nuevo Leon         | Human | Male   | 22 | Released     | Oropharyngeal swab |
| hCoV-19/Mexico/TAM-InDRE_F11747_S989/2021 | EPI_ISL_149465C | 08/03/21 | North America / Mexico / Tamaulipas         | Human | Male   | 62 | Hospitalized | Oropharyngeal swab |
| hCoV-19/Mexico/TAM-InDRE_F11749_S990/2021 | EPI_ISL_1494651 | 09/03/21 | North America / Mexico / Tamaulipas         | Human | Male   | 55 | Live         | Oropharyngeal swab |
| hCoV-19/Mexico/TAM-InDRE_F11750_S991/2021 | EPI_ISL_1494652 | 05/03/21 | North America / Mexico / Tamaulipas         | Human | Female | 21 | Live         | Oropharyngeal swab |
| hCoV-19/Mexico/TAM-InDRE_F11752_S992/2021 | EPI_ISL_1494653 | 08/03/21 | North America / Mexico / Tamaulipas         | Human | Male   | 26 | Released     | Oropharyngeal swab |

|                                             |                 |          |                                          |       |        |    |              |                     |
|---------------------------------------------|-----------------|----------|------------------------------------------|-------|--------|----|--------------|---------------------|
| hCoV-19/Mexico/TAM-InDRE_F11756_S993/2021   | EPI_ISL_1494654 | 10/03/21 | North America / Mexico / Tamaulipas      | Human | Male   | 54 | Released     | Oropharyngeal swab  |
| hCoV-19/Mexico/HID-InDRE_F11158_S994/2021   | EPI_ISL_1494655 | 02/03/21 | North America / Mexico / Hidalgo         | Human | Female | 43 | Deceased     | Oropharyngeal swab  |
| hCoV-19/Mexico/HID-InDRE_F11162_S995/2021   | EPI_ISL_1494656 | 04/03/21 | North America / Mexico / Hidalgo         | Human | Male   | 62 | Released     | Oropharyngeal swab  |
| hCoV-19/Mexico/GUA-InDRE_F11175_S996/2021   | EPI_ISL_1494657 | 02/03/21 | North America / Mexico / Guanajuato      | Human | Female | 76 | Hospitalized | Oropharyngeal swab  |
| hCoV-19/Mexico/GUA-InDRE_F11176_S997/2021   | EPI_ISL_1494658 | 03/03/21 | North America / Mexico / Guanajuato      | Human | Male   | 59 | Hospitalized | Oropharyngeal swab  |
| hCoV-19/Mexico/GUA-InDRE_F11178_S998/2021   | EPI_ISL_1494659 | 04/03/21 | North America / Mexico / Guanajuato      | Human | Male   | 44 | Hospitalized | Oropharyngeal swab  |
| hCoV-19/Mexico/GUA-InDRE_F11184_S999/2021   | EPI_ISL_1494660 | 01/03/21 | North America / Mexico / Guanajuato      | Human | Female | 24 | Released     | Oropharyngeal swab  |
| hCoV-19/Mexico/GUA-InDRE_F11185_S1000/2021  | EPI_ISL_1494661 | 01/03/21 | North America / Mexico / Guanajuato      | Human | Female | 28 | Released     | Oropharyngeal swab  |
| hCoV-19/Mexico/GUA-InDRE_F11186_S1001/2021  | EPI_ISL_1494662 | 02/03/21 | North America / Mexico / Guanajuato      | Human | Male   | 18 | Released     | Oropharyngeal swab  |
| hCoV-19/Mexico/GUA-InDRE_F11188_S1002/2021  | EPI_ISL_1494663 | 02/03/21 | North America / Mexico / Guanajuato      | Human | Male   | 46 | Released     | Oropharyngeal swab  |
| hCoV-19/Mexico/GUA-InDRE_F11189_S1003/2021  | EPI_ISL_1494664 | 03/03/21 | North America / Mexico / Guanajuato      | Human | Female | 59 | Released     | Oropharyngeal swab  |
| hCoV-19/Mexico/GUA-InDRE_F11193_S1004/2021  | EPI_ISL_1494665 | 04/03/21 | North America / Mexico / Guanajuato      | Human | Female | 28 | Released     | Oropharyngeal swab  |
| hCoV-19/Mexico/GUA-InDRE_F11195_S1005/2021  | EPI_ISL_1494666 | 04/03/21 | North America / Mexico / Guanajuato      | Human | Male   | 19 | Released     | Oropharyngeal swab  |
| hCoV-19/Mexico/GUA-InDRE_F11196_S1006/2021  | EPI_ISL_1494667 | 04/03/21 | North America / Mexico / Guanajuato      | Human | Male   | 68 | Released     | Oropharyngeal swab  |
| hCoV-19/Mexico/GUA-InDRE_F11198_S1007/2021  | EPI_ISL_1494668 | 05/03/21 | North America / Mexico / Guanajuato      | Human | Male   | 31 | Released     | Oropharyngeal swab  |
| hCoV-19/Mexico/GUA-InDRE_F11199_S1008/2021  | EPI_ISL_1494669 | 06/03/21 | North America / Mexico / Guanajuato      | Human | Female | 49 | Released     | Oropharyngeal swab  |
| hCoV-19/Mexico/SIN-InDRE_F11201_S1009/2021  | EPI_ISL_1494670 | 01/03/21 | North America / Mexico / Sinaloa         | Human | Male   | 75 | Deceased     | Oropharyngeal swab  |
| hCoV-19/Mexico/SIN-InDRE_F11203_S1010/2021  | EPI_ISL_1494671 | 03/03/21 | North America / Mexico / Sinaloa         | Human | Male   | 63 | Hospitalized | Oropharyngeal swab  |
| hCoV-19/Mexico/SIN-InDRE_F11204_S1011/2021  | EPI_ISL_1494672 | 05/03/21 | North America / Mexico / Sinaloa         | Human | Male   | 44 | Deceased     | Oropharyngeal swab  |
| hCoV-19/Mexico/NLE-InDRE_F11208_S1012/2021  | EPI_ISL_1494673 | 02/03/21 | North America / Mexico / Nuevo Leon      | Human | Female | 60 | Hospitalized | Oropharyngeal swab  |
| hCoV-19/Mexico/SLP-UASLP-AH1COV2SS018_S7/20 | EPI_ISL_1494729 | 11/01/21 | North America / Mexico / San Luis Potosi | Human | Male   | 38 | Hospitalized |                     |
| hCoV-19/Mexico/SLP-UASLP-AH1COV2SS019_S8/20 | EPI_ISL_1494730 | 05/01/21 | North America / Mexico / San Luis Potosi | Human | Female | 51 | Released     |                     |
| hCoV-19/Mexico/CMX-INCMNSZ_COV159238/2021   | EPI_ISL_1502815 | 11/02/21 | North America / Mexico / Mexico City     | Human | Male   | 66 | Deceased     | Nasopharyngeal swab |
| hCoV-19/Mexico/CMX-INCMNSZ_COV152225/2021   | EPI_ISL_1503143 | 24/01/21 | North America / Mexico / Mexico City     | Human | Male   | 80 | Released     | Nasopharyngeal swab |
| hCoV-19/Mexico/NLE-InDRE_F11211_S1013/2021  | EPI_ISL_1504058 | 02/03/21 | North America / Mexico / Nuevo Leon      | Human | Male   | 35 | Hospitalized | Oropharyngeal swab  |
| hCoV-19/Mexico/NLE-InDRE_F11212_S1014/2021  | EPI_ISL_1504059 | 03/03/21 | North America / Mexico / Nuevo Leon      | Human | Male   | 70 | Hospitalized | Oropharyngeal swab  |
| hCoV-19/Mexico/NLE-InDRE_F11215_S1015/2021  | EPI_ISL_1504060 | 04/03/21 | North America / Mexico / Nuevo Leon      | Human | Male   | 50 | Hospitalized | Oropharyngeal swab  |
| hCoV-19/Mexico/NLE-InDRE_F11218_S1016/2021  | EPI_ISL_1504061 | 04/03/21 | North America / Mexico / Nuevo Leon      | Human | Female | 57 | Hospitalized | Oropharyngeal swab  |
| hCoV-19/Mexico/NLE-InDRE_F11225_S1017/2021  | EPI_ISL_1504062 | 02/03/21 | North America / Mexico / Nuevo Leon      | Human | Female | 64 | Released     | Oropharyngeal swab  |
| hCoV-19/Mexico/NLE-InDRE_F11226_S1018/2021  | EPI_ISL_1504063 | 02/03/21 | North America / Mexico / Nuevo Leon      | Human | Female | 56 | Released     | Oropharyngeal swab  |
| hCoV-19/Mexico/NLE-InDRE_F11228_S1019/2021  | EPI_ISL_1504064 | 02/03/21 | North America / Mexico / Nuevo Leon      | Human | Female | 82 | Released     | Oropharyngeal swab  |
| hCoV-19/Mexico/NLE-InDRE_F11231_S1020/2021  | EPI_ISL_1504065 | 01/03/21 | North America / Mexico / Nuevo Leon      | Human | Male   | 18 | Released     | Oropharyngeal swab  |
| hCoV-19/Mexico/NLE-InDRE_F11233_S1021/2021  | EPI_ISL_1504066 | 01/03/21 | North America / Mexico / Nuevo Leon      | Human | Female | 44 | Released     | Oropharyngeal swab  |
| hCoV-19/Mexico/NLE-InDRE_F11235_S1022/2021  | EPI_ISL_1504067 | 04/03/21 | North America / Mexico / Nuevo Leon      | Human | Female | 20 | Released     | Oropharyngeal swab  |
| hCoV-19/Mexico/MOR-InDRE_F11241_S1023/2021  | EPI_ISL_1504068 | 01/03/21 | North America / Mexico / Morelos         | Human | Male   | 17 | Released     | Oropharyngeal swab  |
| hCoV-19/Mexico/MOR-InDRE_F11243_S1024/2021  | EPI_ISL_1504069 | 01/03/21 | North America / Mexico / Morelos         | Human | Female | 54 | Released     | Oropharyngeal swab  |
| hCoV-19/Mexico/MOR-InDRE_F11248_S1025/2021  | EPI_ISL_1504070 | 01/03/21 | North America / Mexico / Morelos         | Human | Female | 69 | Hospitalized | Oropharyngeal swab  |
| hCoV-19/Mexico/MOR-InDRE_F11250_S1026/2021  | EPI_ISL_1504071 | 01/03/21 | North America / Mexico / Morelos         | Human | Male   | 56 | Released     | Oropharyngeal swab  |
| hCoV-19/Mexico/MOR-InDRE_F11251_S1027/2021  | EPI_ISL_1504072 | 02/03/21 | North America / Mexico / Morelos         | Human | Male   | 58 | Released     | Oropharyngeal swab  |
| hCoV-19/Mexico/MOR-InDRE_F11252_S1028/2021  | EPI_ISL_1504073 | 02/03/21 | North America / Mexico / Morelos         | Human | Male   | 47 | Released     | Oropharyngeal swab  |
| hCoV-19/Mexico/MOR-InDRE_F11254_S1029/2021  | EPI_ISL_1504074 | 02/03/21 | North America / Mexico / Morelos         | Human | Female | 47 | Released     | Oropharyngeal swab  |
| hCoV-19/Mexico/MOR-InDRE_F11256_S1030/2021  | EPI_ISL_1504075 | 02/03/21 | North America / Mexico / Morelos         | Human | Male   | 50 | Released     | Oropharyngeal swab  |
| hCoV-19/Mexico/MOR-InDRE_F11257_S1031/2021  | EPI_ISL_1504076 | 02/03/21 | North America / Mexico / Morelos         | Human | Male   | 83 | Hospitalized | Oropharyngeal swab  |
| hCoV-19/Mexico/MOR-InDRE_F11261_S1032/2021  | EPI_ISL_1504077 | 01/03/21 | North America / Mexico / Morelos         | Human | Female | 21 | Hospitalized | Oropharyngeal swab  |

|                                                           |          |                                              |       |        |    |              |                    |
|-----------------------------------------------------------|----------|----------------------------------------------|-------|--------|----|--------------|--------------------|
| hCoV-19/Mexico/MOR-InDRE_F11264_S1033/2021EPI_ISL_1504078 | 02/03/21 | North America / Mexico / Morelos             | Human | Female | 51 | Released     | Oropharyngeal swab |
| hCoV-19/Mexico/MOR-InDRE_F11265_S1034/2021EPI_ISL_1504079 | 02/03/21 | North America / Mexico / Morelos             | Human | Female | 51 | Released     | Oropharyngeal swab |
| hCoV-19/Mexico/MOR-InDRE_F11266_S1035/2021EPI_ISL_1504080 | 03/03/21 | North America / Mexico / Morelos             | Human | Male   | 48 | Hospitalized | Oropharyngeal swab |
| hCoV-19/Mexico/MOR-InDRE_F11267_S1036/2021EPI_ISL_1504081 | 02/03/21 | North America / Mexico / Morelos             | Human | Female | 58 | Hospitalized | Oropharyngeal swab |
| hCoV-19/Mexico/MOR-InDRE_F11275_S1037/2021EPI_ISL_1504082 | 03/03/21 | North America / Mexico / Morelos             | Human | Male   | 54 | Hospitalized | Oropharyngeal swab |
| hCoV-19/Mexico/CMX-InDRE_F11309_S1038/2021EPI_ISL_1504083 | 10/03/21 | North America / Mexico / Mexico City         | Human | Male   | 44 | Released     | Oropharyngeal swab |
| hCoV-19/Mexico/CHH-InDRE_F11316_S1039/2021EPI_ISL_1504084 | 01/03/21 | North America / Mexico / Chihuahua           | Human | Female | 53 | Live         | Oropharyngeal swab |
| hCoV-19/Mexico/CHH-InDRE_F11322_S1040/2021EPI_ISL_1504085 | 01/03/21 | North America / Mexico / Chihuahua           | Human | Female | 53 | Released     | Oropharyngeal swab |
| hCoV-19/Mexico/CHH-InDRE_F11325_S1041/2021EPI_ISL_1504086 | 01/03/21 | North America / Mexico / Chihuahua           | Human | Female | 39 | Live         | Oropharyngeal swab |
| hCoV-19/Mexico/CHH-InDRE_F11335_S1042/2021EPI_ISL_1504087 | 01/03/21 | North America / Mexico / Chihuahua           | Human | Female | 42 | Hospitalized | Oropharyngeal swab |
| hCoV-19/Mexico/CHH-InDRE_F11337_S1043/2021EPI_ISL_1504088 | 03/03/21 | North America / Mexico / Chihuahua           | Human | Male   | 96 | Deceased     | Oropharyngeal swab |
| hCoV-19/Mexico/QUE-InDRE_F11343_S1044/2021EPI_ISL_1504089 | 03/03/21 | North America / Mexico / Queretaro           | Human | Male   | 84 | Released     | Oropharyngeal swab |
| hCoV-19/Mexico/QUE-InDRE_F11344_S1045/2021EPI_ISL_1504090 | 03/03/21 | North America / Mexico / Queretaro           | Human | Male   | 62 | Hospitalized | Oropharyngeal swab |
| hCoV-19/Mexico/QUE-InDRE_F11345_S1046/2021EPI_ISL_1504091 | 03/03/21 | North America / Mexico / Queretaro           | Human | Male   | 31 | Hospitalized | Oropharyngeal swab |
| hCoV-19/Mexico/QUE-InDRE_F11346_S1047/2021EPI_ISL_1504092 | 03/03/21 | North America / Mexico / Queretaro           | Human | Female | 47 | Released     | Oropharyngeal swab |
| hCoV-19/Mexico/QUE-InDRE_F11347_S1048/2021EPI_ISL_1504093 | 03/03/21 | North America / Mexico / Queretaro           | Human | Male   | 44 | Hospitalized | Oropharyngeal swab |
| hCoV-19/Mexico/QUE-InDRE_F11348_S1049/2021EPI_ISL_1504094 | 04/03/21 | North America / Mexico / Queretaro           | Human | Female | 50 | Released     | Oropharyngeal swab |
| hCoV-19/Mexico/QUE-InDRE_F11349_S1050/2021EPI_ISL_1504095 | 04/03/21 | North America / Mexico / Queretaro           | Human | Female | 59 | Released     | Oropharyngeal swab |
| hCoV-19/Mexico/QUE-InDRE_F11351_S1051/2021EPI_ISL_1504096 | 05/03/21 | North America / Mexico / Queretaro           | Human | Male   | 39 | Released     | Oropharyngeal swab |
| hCoV-19/Mexico/QUE-InDRE_F11352_S1052/2021EPI_ISL_1504097 | 05/03/21 | North America / Mexico / Queretaro           | Human | Female | 40 | Hospitalized | Oropharyngeal swab |
| hCoV-19/Mexico/QUE-InDRE_F11353_S1053/2021EPI_ISL_1504098 | 05/03/21 | North America / Mexico / Queretaro           | Human | Female | 37 | Released     | Oropharyngeal swab |
| hCoV-19/Mexico/QUE-InDRE_F11357_S1054/2021EPI_ISL_1504099 | 06/03/21 | North America / Mexico / Queretaro           | Human | Male   | 27 | Released     | Oropharyngeal swab |
| hCoV-19/Mexico/QUE-InDRE_F11361_S1055/2021EPI_ISL_1504100 | 06/03/21 | North America / Mexico / Queretaro           | Human | Male   | 49 | Hospitalized | Oropharyngeal swab |
| hCoV-19/Mexico/QUE-InDRE_F11362_S1056/2021EPI_ISL_1504101 | 08/03/21 | North America / Mexico / Queretaro           | Human | Male   | 57 | Hospitalized | Oropharyngeal swab |
| hCoV-19/Mexico/QUE-InDRE_F11364_S1057/2021EPI_ISL_1504102 | 08/03/21 | North America / Mexico / Queretaro           | Human | Female | 81 | Hospitalized | Oropharyngeal swab |
| hCoV-19/Mexico/QUE-InDRE_F11365_S1058/2021EPI_ISL_1504103 | 08/03/21 | North America / Mexico / Queretaro           | Human | Female | 80 | Hospitalized | Oropharyngeal swab |
| hCoV-19/Mexico/GRO-InDRE_F11377_S1059/2021EPI_ISL_1504104 | 01/03/21 | North America / Mexico / Guerrero            | Human | Male   | 67 | Deceased     | Oropharyngeal swab |
| hCoV-19/Mexico/BCS-InDRE_F11397_S1060/2021EPI_ISL_1504105 | 03/03/21 | North America / Mexico / Baja California Sur | Human | Female | 41 | Released     | Oropharyngeal swab |
| hCoV-19/Mexico/ZAC-InDRE_F11430_S1061/2021EPI_ISL_1504106 | 04/03/21 | North America / Mexico / Zacatecas           | Human | Female | 54 | Live         | Oropharyngeal swab |
| hCoV-19/Mexico/ZAC-InDRE_F11433_S1062/2021EPI_ISL_1504107 | 05/03/21 | North America / Mexico / Zacatecas           | Human | Female | 63 | Live         | Oropharyngeal swab |
| hCoV-19/Mexico/BCN-InDRE_F11452_S1063/2021EPI_ISL_1504108 | 05/03/21 | North America / Mexico / Baja California     | Human | Male   | 42 | Hospitalized | Oropharyngeal swab |
| hCoV-19/Mexico/JAL-InDRE_F11470_S1064/2021EPI_ISL_1504109 | 05/03/21 | North America / Mexico / Jalisco             | Human | Female | 26 | Released     | Oropharyngeal swab |
| hCoV-19/Mexico/QUE-InDRE_F11715_S1065/2021EPI_ISL_1504110 | 12/03/21 | North America / Mexico / Queretaro           | Human | Female | 79 | Hospitalized | Oropharyngeal swab |
| hCoV-19/Mexico/QUE-InDRE_F11731_S1066/2021EPI_ISL_1504111 | 14/03/21 | North America / Mexico / Queretaro           | Human | Male   | 87 | Deceased     | Oropharyngeal swab |
| hCoV-19/Mexico/HID-InDRE_F11498_S1069/2021EPI_ISL_1516763 | 08/03/21 | North America / Mexico / Hidalgo             | Human | Male   | 78 | Deceased     | Oropharyngeal swab |
| hCoV-19/Mexico/PUE-InDRE_F11502_S1070/2021EPI_ISL_1516764 | 08/03/21 | North America / Mexico / Puebla              | Human | Male   | 75 | Hospitalized | Oropharyngeal swab |
| hCoV-19/Mexico/CHH-InDRE_F11647_S1072/2021EPI_ISL_1516766 | 06/03/21 | North America / Mexico / Chihuahua           | Human | Female | 42 | Live         | Oropharyngeal swab |
| hCoV-19/Mexico/NLE-InDRE_F11676_S1079/2021EPI_ISL_1516772 | 08/03/21 | North America / Mexico / Nuevo Leon          | Human | Female | 64 | Released     | Oropharyngeal swab |
| hCoV-19/Mexico/CMX-InDRE_F34272_S1096/2021EPI_ISL_1516788 | 16/03/21 | North America / Mexico / Mexico City         | Human | Female | 19 | Released     | Oropharyngeal swab |
| hCoV-19/Mexico/MOR-InDRE_F11259_S1118/2021EPI_ISL_1516809 | 01/03/21 | North America / Mexico / Morelos             | Human | Male   | 40 | Hospitalized | Oropharyngeal swab |
| hCoV-19/Mexico/MOR-InDRE_F11273_S1121/2021EPI_ISL_1516812 | 03/03/21 | North America / Mexico / Morelos             | Human | Female | 41 | Released     | Oropharyngeal swab |
| hCoV-19/Mexico/MOR-InDRE_F11277_S1124/2021EPI_ISL_1516815 | 04/03/21 | North America / Mexico / Morelos             | Human | Male   | 66 | Released     | Oropharyngeal swab |
| hCoV-19/Mexico/QUE-InDRE_F11356_S1133/2021EPI_ISL_1516824 | 06/03/21 | North America / Mexico / Queretaro           | Human | Male   | 58 | Released     | Oropharyngeal swab |
| hCoV-19/Mexico/QUE-InDRE_F11366_S1136/2021EPI_ISL_1532236 | 08/03/21 | North America / Mexico / Queretaro           | Human | Male   | 48 | Hospitalized | Oropharyngeal swab |

|                                                           |          |                                              |       |        |    |              |                     |
|-----------------------------------------------------------|----------|----------------------------------------------|-------|--------|----|--------------|---------------------|
| hCoV-19/Mexico/QUE-InDRE_F11373_S1139/2021EPI_ISL_1532239 | 09/03/21 | North America / Mexico / Queretaro           | Human | Male   | 31 | Released     | Oro-pharyngeal swab |
| hCoV-19/Mexico/GRO-InDRE_F11378_S1140/2021EPI_ISL_1532240 | 04/03/21 | North America / Mexico / Guerrero            | Human | Male   | 79 | Released     | Oro-pharyngeal swab |
| hCoV-19/Mexico/GRO-InDRE_F11380_S1141/2021EPI_ISL_1532241 | 03/03/21 | North America / Mexico / Guerrero            | Human | Female | 90 | Deceased     | Oro-pharyngeal swab |
| hCoV-19/Mexico/BCS-InDRE_F11398_S1143/2021EPI_ISL_1532243 | 03/03/21 | North America / Mexico / Baja California Sur | Human | Male   | 43 | Released     | Oro-pharyngeal swab |
| hCoV-19/Mexico/BCS-InDRE_F11399_S1144/2021EPI_ISL_1532244 | 03/03/21 | North America / Mexico / Baja California Sur | Human | Male   | 24 | Released     | Oro-pharyngeal swab |
| hCoV-19/Mexico/BCS-InDRE_F11402_S1145/2021EPI_ISL_1532245 | 01/03/21 | North America / Mexico / Baja California Sur | Human | Male   | 34 | Released     | Oro-pharyngeal swab |
| hCoV-19/Mexico/CHP-InDRE_F11406_S1146/2021EPI_ISL_1532246 | 01/03/21 | North America / Mexico / Chiapas             | Human | Male   | 70 | Hospitalized | Oro-pharyngeal swab |
| hCoV-19/Mexico/CHP-InDRE_F11407_S1147/2021EPI_ISL_1532247 | 04/03/21 | North America / Mexico / Chiapas             | Human | Female | 42 | Live         | Oro-pharyngeal swab |
| hCoV-19/Mexico/YUC-InDRE_F11416_S1148/2021EPI_ISL_1532248 | 03/03/21 | North America / Mexico / Yucatan             | Human | Male   | 70 | Hospitalized | Oro-pharyngeal swab |
| hCoV-19/Mexico/ZAC-InDRE_F11434_S1153/2021EPI_ISL_1532253 | 05/03/21 | North America / Mexico / Zacatecas           | Human | Male   | 15 | Live         | Oro-pharyngeal swab |
| hCoV-19/Mexico/ZAC-InDRE_F11436_S1155/2021EPI_ISL_1532255 | 05/03/21 | North America / Mexico / Zacatecas           | Human | Male   | 41 | Live         | Oro-pharyngeal swab |
| hCoV-19/Mexico/ZAC-InDRE_F11437_S1156/2021EPI_ISL_1532256 | 05/03/21 | North America / Mexico / Zacatecas           | Human | Female | 76 | Live         | Oro-pharyngeal swab |
| hCoV-19/Mexico/ZAC-InDRE_F11441_S1158/2021EPI_ISL_1532258 | 09/03/21 | North America / Mexico / Zacatecas           | Human | Female | 60 | Released     | Oro-pharyngeal swab |
| hCoV-19/Mexico/ZAC-InDRE_F11443_S1160/2021EPI_ISL_1532260 | 09/03/21 | North America / Mexico / Zacatecas           | Human | Male   | 18 | Live         | Oro-pharyngeal swab |
| hCoV-19/Mexico/ZAC-InDRE_F11445_S1162/2021EPI_ISL_1532262 | 08/03/21 | North America / Mexico / Zacatecas           | Human | Male   | 67 | Hospitalized | Oro-pharyngeal swab |
| hCoV-19/Mexico/CMX-InDRE_F11460_S1165/2021EPI_ISL_1532265 | 05/03/21 | North America / Mexico / Mexico City         | Human | Male   | 62 | Deceased     | Oro-pharyngeal swab |
| hCoV-19/Mexico/JAL-InDRE_F11462_S1166/2021EPI_ISL_1532266 | 01/03/21 | North America / Mexico / Jalisco             | Human | Male   | 45 | Hospitalized | Oro-pharyngeal swab |
| hCoV-19/Mexico/JAL-InDRE_F11464_S1167/2021EPI_ISL_1532267 | 03/03/21 | North America / Mexico / Jalisco             | Human | Female | 80 | Hospitalized | Oro-pharyngeal swab |
| hCoV-19/Mexico/JAL-InDRE_F11469_S1169/2021EPI_ISL_1532269 | 04/03/21 | North America / Mexico / Jalisco             | Human | Male   | 50 | Released     | Oro-pharyngeal swab |
| hCoV-19/Mexico/JAL-InDRE_F11520_S1170/2021EPI_ISL_1532270 | 09/03/21 | North America / Mexico / Jalisco             | Human | Female | 28 | Released     | Oro-pharyngeal swab |
| hCoV-19/Mexico/QUE-InDRE_F11710_S1172/2021EPI_ISL_1532272 | 10/03/21 | North America / Mexico / Queretaro           | Human | Female | 43 | Released     | Oro-pharyngeal swab |
| hCoV-19/Mexico/QUE-InDRE_F11711_S1173/2021EPI_ISL_1532273 | 11/03/21 | North America / Mexico / Queretaro           | Human | Female | 71 | Released     | Oro-pharyngeal swab |
| hCoV-19/Mexico/QUE-InDRE_F11718_S1175/2021EPI_ISL_1532275 | 12/03/21 | North America / Mexico / Queretaro           | Human | Male   | 75 | Hospitalized | Oro-pharyngeal swab |
| hCoV-19/Mexico/QUE-InDRE_F11725_S1176/2021EPI_ISL_1532276 | 13/03/21 | North America / Mexico / Queretaro           | Human | Male   | 44 | Hospitalized | Oro-pharyngeal swab |
| hCoV-19/Mexico/QUE-InDRE_F11726_S1177/2021EPI_ISL_1532277 | 14/03/21 | North America / Mexico / Queretaro           | Human | Female | 56 | Released     | Oro-pharyngeal swab |
| hCoV-19/Mexico/QUE-InDRE_F11729_S1178/2021EPI_ISL_1532278 | 14/03/21 | North America / Mexico / Queretaro           | Human | Female | 36 | Released     | Oro-pharyngeal swab |
| hCoV-19/Mexico/CMX-InDRE_F11761_S1179/2021EPI_ISL_1532279 | 12/03/21 | North America / Mexico / Mexico City         | Human | Male   | 56 | Released     | Oro-pharyngeal swab |
| hCoV-19/Mexico/ROO-InDRE_F11811_S1181/2021EPI_ISL_1532281 | 12/03/21 | North America / Mexico / Quintana Roo        | Human | Male   | 66 | Deceased     | Oro-pharyngeal swab |
| hCoV-19/Mexico/CMX-INMEGEN-03-09-01/2021 EPI_ISL_1558802  | 19/03/21 | North America / Mexico / Mexico City         | Human | Male   | 70 | unknown      | Oropharyngeal swab  |
| hCoV-19/Mexico/CMX-INMEGEN-03-09-02/2021 EPI_ISL_1558803  | 19/03/21 | North America / Mexico / Mexico City         | Human | Male   | 65 | unknown      | Oropharyngeal swab  |
| hCoV-19/Mexico/CMX-INMEGEN-03-09-03/2021 EPI_ISL_1558804  | 19/03/21 | North America / Mexico / Mexico City         | Human | Female | 62 | unknown      | Oropharyngeal swab  |
| hCoV-19/Mexico/CMX-INMEGEN-03-09-04/2021 EPI_ISL_1558805  | 19/03/21 | North America / Mexico / Mexico City         | Human | Male   | 48 | unknown      | Oropharyngeal swab  |
| hCoV-19/Mexico/CMX-INMEGEN-03-09-05/2021 EPI_ISL_1558806  | 19/03/21 | North America / Mexico / Mexico City         | Human | Male   | 37 | unknown      | Oropharyngeal swab  |
| hCoV-19/Mexico/CMX-INMEGEN-03-09-06/2021 EPI_ISL_1558807  | 19/03/21 | North America / Mexico / Mexico City         | Human | Male   | 16 | unknown      | Oropharyngeal swab  |
| hCoV-19/Mexico/CMX-INMEGEN-03-09-07/2021 EPI_ISL_1558808  | 19/03/21 | North America / Mexico / Mexico City         | Human | Female | 79 | unknown      | Oropharyngeal swab  |
| hCoV-19/Mexico/CMX-INMEGEN-03-09-09/2021 EPI_ISL_1558809  | 19/03/21 | North America / Mexico / Mexico City         | Human | Female | 33 | unknown      | Oropharyngeal swab  |
| hCoV-19/Mexico/CMX-INMEGEN-03-09-10/2021 EPI_ISL_1558810  | 19/03/21 | North America / Mexico / Mexico City         | Human | Female | 64 | unknown      | Oropharyngeal swab  |
| hCoV-19/Mexico/CMX-INMEGEN-03-09-11/2021 EPI_ISL_1558811  | 19/03/21 | North America / Mexico / Mexico City         | Human | Female | 59 | unknown      | Oropharyngeal swab  |
| hCoV-19/Mexico/CMX-INMEGEN-03-09-12/2021 EPI_ISL_1558812  | 19/03/21 | North America / Mexico / Mexico City         | Human | Male   | 73 | unknown      | Oropharyngeal swab  |
| hCoV-19/Mexico/CMX-INMEGEN-03-09-13/2021 EPI_ISL_1558813  | 18/03/21 | North America / Mexico / Mexico City         | Human | Male   | 56 | unknown      | Oropharyngeal swab  |
| hCoV-19/Mexico/CMX-INMEGEN-03-09-14/2021 EPI_ISL_1558814  | 18/03/21 | North America / Mexico / Mexico City         | Human | Male   | 58 | unknown      | Oropharyngeal swab  |
| hCoV-19/Mexico/CMX-INMEGEN-03-09-15/2021 EPI_ISL_1558815  | 18/03/21 | North America / Mexico / Mexico City         | Human | Male   | 65 | unknown      | Oropharyngeal swab  |
| hCoV-19/Mexico/CMX-INMEGEN-03-09-16/2021 EPI_ISL_1558816  | 18/03/21 | North America / Mexico / Mexico City         | Human | Male   | 55 | unknown      | Oropharyngeal swab  |
| hCoV-19/Mexico/CMX-INMEGEN-03-09-17/2021 EPI_ISL_1558817  | 18/03/21 | North America / Mexico / Mexico City         | Human | Female | 74 | unknown      | Oropharyngeal swab  |

|                                          |                 |          |                                       |       |        |    |              |                                       |
|------------------------------------------|-----------------|----------|---------------------------------------|-------|--------|----|--------------|---------------------------------------|
| hCoV-19/Mexico/CMX-INMEGEN-03-09-18/2021 | EPI_ISL_1558818 | 18/03/21 | North America / Mexico / Mexico City  | Human | Female | 53 | unknown      | Oropharyngeal swab                    |
| hCoV-19/Mexico/CMX-INMEGEN-03-09-19/2021 | EPI_ISL_1558819 | 18/03/21 | North America / Mexico / Mexico City  | Human | Female | 36 | unknown      | Oropharyngeal swab                    |
| hCoV-19/Mexico/CMX-INMEGEN-03-09-20/2021 | EPI_ISL_1558820 | 18/03/21 | North America / Mexico / Mexico City  | Human | Male   | 59 | unknown      | Oropharyngeal swab                    |
| hCoV-19/Mexico/CMX-INMEGEN-03-09-21/2021 | EPI_ISL_1558821 | 18/03/21 | North America / Mexico / Mexico City  | Human | Male   | 47 | unknown      | Oropharyngeal swab                    |
| hCoV-19/Mexico/CMX-INMEGEN-03-09-22/2021 | EPI_ISL_1558822 | 18/03/21 | North America / Mexico / Mexico City  | Human | Male   | 66 | unknown      | Oropharyngeal swab                    |
| hCoV-19/Mexico/CMX-INMEGEN-03-09-23/2021 | EPI_ISL_1558823 | 18/03/21 | North America / Mexico / Mexico City  | Human | Female | 70 | unknown      | Oropharyngeal swab                    |
| hCoV-19/Mexico/CMX-INMEGEN-03-09-24/2021 | EPI_ISL_1558824 | 18/03/21 | North America / Mexico / Mexico City  | Human | Female | 59 | unknown      | Oropharyngeal swab                    |
| hCoV-19/Mexico/CMX-INMEGEN-03-09-25/2021 | EPI_ISL_1558825 | 17/03/21 | North America / Mexico / Mexico City  | Human | Female | 61 | unknown      | Oropharyngeal swab                    |
| hCoV-19/Mexico/CMX-INMEGEN-03-09-27/2021 | EPI_ISL_1558826 | 17/03/21 | North America / Mexico / Mexico City  | Human | Male   | 44 | unknown      | Oropharyngeal swab                    |
| hCoV-19/Mexico/CMX-INMEGEN-03-09-28/2021 | EPI_ISL_1558827 | 17/03/21 | North America / Mexico / Mexico City  | Human | Male   | 72 | unknown      | Oropharyngeal swab                    |
| hCoV-19/Mexico/CHH_INER_IMSS_00372/2021  | EPI_ISL_1585384 | 03/03/21 | North America / Mexico / Chihuahua    | Human | Female | 45 | Ambulatory   | Nasopharyngeal swab                   |
| hCoV-19/Mexico/CHH_INER_IMSS_00374/2021  | EPI_ISL_1585386 | 02/03/21 | North America / Mexico / Chihuahua    | Human | Male   | 35 | Hospitalized | Nasopharyngeal and oropharyngeal swab |
| hCoV-19/Mexico/CHH_INER_IMSS_00377/2021  | EPI_ISL_1585388 | 01/03/21 | North America / Mexico / Chihuahua    | Human | Male   | 54 | Hospitalized | Nasopharyngeal and oropharyngeal swab |
| hCoV-19/Mexico/CHH_INER_IMSS_00378/2021  | EPI_ISL_1585389 | 01/03/21 | North America / Mexico / Chihuahua    | Human | Female | 52 | Hospitalized | Nasopharyngeal and oropharyngeal swab |
| hCoV-19/Mexico/DUR_INER_IMSS_00385/2021  | EPI_ISL_1585395 | 10/03/21 | North America / Mexico / Durango      | Human | Female | 37 | Ambulatory   | Nasopharyngeal and oropharyngeal swab |
| hCoV-19/Mexico/DUR_INER_IMSS_00386/2021  | EPI_ISL_1585396 | 11/03/21 | North America / Mexico / Durango      | Human | Male   | 85 | Hospitalized | Nasopharyngeal and oropharyngeal swab |
| hCoV-19/Mexico/CHH_INER_IMSS_00387/2021  | EPI_ISL_1585397 | 08/03/21 | North America / Mexico / Chihuahua    | Human | Male   | 46 | Ambulatory   | Oropharyngeal swab                    |
| hCoV-19/Mexico/COA_INER_IMSS_00388/2021  | EPI_ISL_1585398 | 10/03/21 | North America / Mexico / Coahuila     | Human | Female | 81 | Ambulatory   | Nasopharyngeal and oropharyngeal swab |
| hCoV-19/Mexico/CHH_INER_IMSS_00392/2021  | EPI_ISL_1585402 | 08/03/21 | North America / Mexico / Chihuahua    | Human | Male   | 77 | Ambulatory   | Nasopharyngeal and oropharyngeal swab |
| hCoV-19/Mexico/CHH_INER_IMSS_00393/2021  | EPI_ISL_1585403 | 07/03/21 | North America / Mexico / Chihuahua    | Human | Male   | 56 | Ambulatory   | Nasopharyngeal swab                   |
| hCoV-19/Mexico/CHH_INER_IMSS_00397/2021  | EPI_ISL_1585407 | 09/03/21 | North America / Mexico / Chihuahua    | Human | Male   | 71 | Hospitalized | Nasopharyngeal and oropharyngeal swab |
| hCoV-19/Mexico/NLE_INER_IMSS_00399/2021  | EPI_ISL_1585409 | 15/03/21 | North America / Mexico / Nuevo Leon   | Human | Female | 26 | Hospitalized | Nasopharyngeal and oropharyngeal swab |
| hCoV-19/Mexico/NLE_INER_IMSS_00400/2021  | EPI_ISL_1585410 | 15/03/21 | North America / Mexico / Nuevo Leon   | Human | Female | 51 | Hospitalized | Nasopharyngeal and oropharyngeal swab |
| hCoV-19/Mexico/NLE_INER_IMSS_00401/2021  | EPI_ISL_1585411 | 16/03/21 | North America / Mexico / Nuevo Leon   | Human | Male   | 70 | Ambulatory   | Nasopharyngeal swab                   |
| hCoV-19/Mexico/NLE_INER_IMSS_00402/2021  | EPI_ISL_1585412 | 16/03/21 | North America / Mexico / Nuevo Leon   | Human | Female | 71 | Hospitalized | Nasopharyngeal and oropharyngeal swab |
| hCoV-19/Mexico/COA_INER_IMSS_00405/2021  | EPI_ISL_1585414 | 14/03/21 | North America / Mexico / Coahuila     | Human | Female | 70 | Hospitalized | Nasopharyngeal and oropharyngeal swab |
| hCoV-19/Mexico/COA_INER_IMSS_00406/2021  | EPI_ISL_1585415 | 14/03/21 | North America / Mexico / Coahuila     | Human | Male   | 74 | Ambulatory   | Nasopharyngeal and oropharyngeal swab |
| hCoV-19/Mexico/DUR_INER_IMSS_00407/2021  | EPI_ISL_1585416 | 16/03/21 | North America / Mexico / Durango      | Human | Male   | 60 | Hospitalized | Nasopharyngeal and oropharyngeal swab |
| hCoV-19/Mexico/DUR_INER_IMSS_00408/2021  | EPI_ISL_1585417 | 16/03/21 | North America / Mexico / Durango      | Human | Female | 47 | Ambulatory   | Nasopharyngeal and oropharyngeal swab |
| hCoV-19/Mexico/TAM_INER_IMSS_00413/2021  | EPI_ISL_1585421 | 17/03/21 | North America / Mexico / Tamaulipas   | Human | Female | 37 | Ambulatory   | Nasopharyngeal and oropharyngeal swab |
| hCoV-19/Mexico/CHH_INER_IMSS_00417/2021  | EPI_ISL_1585425 | 14/03/21 | North America / Mexico / Chihuahua    | Human | Male   | 47 | Hospitalized | Nasopharyngeal and oropharyngeal swab |
| hCoV-19/Mexico/YUC_INER_IMSS_00421/2021  | EPI_ISL_1585429 | 07/03/21 | North America / Mexico / Yucatan      | Human | Male   | 73 | Hospitalized | Nasopharyngeal swab                   |
| hCoV-19/Mexico/ROO_INER_IMSS_00424/2021  | EPI_ISL_1585432 | 08/03/21 | North America / Mexico / Quintana Roo | Human | Female | 69 | Hospitalized | Nasopharyngeal swab                   |
| hCoV-19/Mexico/YUC_INER_IMSS_00425/2021  | EPI_ISL_1585433 | 05/03/21 | North America / Mexico / Yucatan      | Human | Male   | 50 | Deceased     | Nasopharyngeal and oropharyngeal swab |
| hCoV-19/Mexico/TAB_INER_IMSS_00426/2021  | EPI_ISL_1585434 | 04/03/21 | North America / Mexico / Tabasco      | Human | Male   | 27 | Ambulatory   | Nasopharyngeal and oropharyngeal swab |
| hCoV-19/Mexico/YUC_INER_IMSS_00427/2021  | EPI_ISL_1585435 | 10/03/21 | North America / Mexico / Yucatan      | Human | Male   | 73 | Hospitalized | Nasopharyngeal and oropharyngeal swab |
| hCoV-19/Mexico/YUC_INER_IMSS_00428/2021  | EPI_ISL_1585436 | 10/03/21 | North America / Mexico / Yucatan      | Human | Male   | 85 | Hospitalized | Oropharyngeal swab                    |
| hCoV-19/Mexico/YUC_INER_IMSS_00430/2021  | EPI_ISL_1585438 | 10/03/21 | North America / Mexico / Yucatan      | Human | Male   | 36 | Ambulatory   | Nasopharyngeal and oropharyngeal swab |
| hCoV-19/Mexico/YUC_INER_IMSS_00431/2021  | EPI_ISL_1585439 | 11/03/21 | North America / Mexico / Yucatan      | Human | Male   | 63 | Hospitalized | Nasopharyngeal swab                   |
| hCoV-19/Mexico/YUC_INER_IMSS_00432/2021  | EPI_ISL_1585440 | 11/03/21 | North America / Mexico / Yucatan      | Human | Female | 61 | Hospitalized | Nasopharyngeal and oropharyngeal swab |
| hCoV-19/Mexico/YUC_INER_IMSS_00433/2021  | EPI_ISL_1585441 | 10/03/21 | North America / Mexico / Yucatan      | Human | Male   | 34 | Hospitalized | Nasopharyngeal and oropharyngeal swab |
| hCoV-19/Mexico/ROO_INER_IMSS_00435/2021  | EPI_ISL_1585443 | 09/03/21 | North America / Mexico / Quintana Roo | Human | Female | 72 | Hospitalized | Nasopharyngeal and oropharyngeal swab |
| hCoV-19/Mexico/YUC_INER_IMSS_00439/2021  | EPI_ISL_1585447 | 14/03/21 | North America / Mexico / Yucatan      | Human | Female | 61 | Deceased     | Nasopharyngeal and oropharyngeal swab |
| hCoV-19/Mexico/ROO_INER_IMSS_00440/2021  | EPI_ISL_1585448 | 12/03/21 | North America / Mexico / Quintana Roo | Human | Male   | 69 | Hospitalized | Nasopharyngeal and oropharyngeal swab |

|                                         |                 |          |                                     |       |        |    |              |                                       |
|-----------------------------------------|-----------------|----------|-------------------------------------|-------|--------|----|--------------|---------------------------------------|
| hCoV-19/Mexico/YUC_INER_IMSS_00442/2021 | EPI_ISL_1585449 | 16/03/21 | North America / Mexico / Yucatan    | Human | Male   | 41 | Ambulatory   | Nasopharyngeal and oropharyngeal swab |
| hCoV-19/Mexico/YUC_INER_IMSS_00443/2021 | EPI_ISL_1585450 | 15/03/21 | North America / Mexico / Yucatan    | Human | Female | 67 | Hospitalized | Nasopharyngeal swab                   |
| hCoV-19/Mexico/YUC_INER_IMSS_00444/2021 | EPI_ISL_1585451 | 16/03/21 | North America / Mexico / Yucatan    | Human | Male   | 22 | Hospitalized | Nasopharyngeal and oropharyngeal swab |
| hCoV-19/Mexico/YUC_INER_IMSS_00445/2021 | EPI_ISL_1585452 | 17/03/21 | North America / Mexico / Yucatan    | Human | Male   | 21 | Hospitalized | Nasopharyngeal swab                   |
| hCoV-19/Mexico/YUC_INER_IMSS_00446/2021 | EPI_ISL_1585453 | 17/03/21 | North America / Mexico / Yucatan    | Human | Male   | 56 | Hospitalized | Nasopharyngeal and oropharyngeal swab |
| hCoV-19/Mexico/YUC_INER_IMSS_00447/2021 | EPI_ISL_1585454 | 17/03/21 | North America / Mexico / Yucatan    | Human | Female | 63 | Hospitalized | Nasopharyngeal swab                   |
| hCoV-19/Mexico/ZAC_INER_IMSS_00448/2021 | EPI_ISL_1585455 | 07/03/21 | North America / Mexico / Zacatecas  | Human | Female | 73 | Hospitalized | Nasopharyngeal and oropharyngeal swab |
| hCoV-19/Mexico/ZAC_INER_IMSS_00449/2021 | EPI_ISL_1585456 | 07/03/21 | North America / Mexico / Zacatecas  | Human | Female | 31 | Ambulatory   | Nasopharyngeal and oropharyngeal swab |
| hCoV-19/Mexico/ZAC_INER_IMSS_00450/2021 | EPI_ISL_1585457 | 08/03/21 | North America / Mexico / Zacatecas  | Human | Female | 47 | Ambulatory   | Nasopharyngeal and oropharyngeal swab |
| hCoV-19/Mexico/ZAC_INER_IMSS_00453/2021 | EPI_ISL_1585460 | 08/03/21 | North America / Mexico / Zacatecas  | Human | Female | 37 | Ambulatory   | Nasopharyngeal and oropharyngeal swab |
| hCoV-19/Mexico/ZAC_INER_IMSS_00454/2021 | EPI_ISL_1585461 | 08/03/21 | North America / Mexico / Zacatecas  | Human | Female | 33 | Ambulatory   | Nasopharyngeal and oropharyngeal swab |
| hCoV-19/Mexico/ZAC_INER_IMSS_00456/2021 | EPI_ISL_1585463 | 09/03/21 | North America / Mexico / Zacatecas  | Human | Female | 32 | Ambulatory   | Nasopharyngeal and oropharyngeal swab |
| hCoV-19/Mexico/ZAC_INER_IMSS_00457/2021 | EPI_ISL_1585464 | 10/03/21 | North America / Mexico / Zacatecas  | Human | Male   | 57 | Ambulatory   | Nasopharyngeal and oropharyngeal swab |
| hCoV-19/Mexico/ZAC_INER_IMSS_00461/2021 | EPI_ISL_1585467 | 11/03/21 | North America / Mexico / Zacatecas  | Human | Male   | 79 | Hospitalized | Nasopharyngeal and oropharyngeal swab |
| hCoV-19/Mexico/ZAC_INER_IMSS_00464/2021 | EPI_ISL_1585470 | 14/03/21 | North America / Mexico / Zacatecas  | Human | Female | 64 | Hospitalized | Nasopharyngeal and oropharyngeal swab |
| hCoV-19/Mexico/ZAC_INER_IMSS_00465/2021 | EPI_ISL_1585471 | 16/03/21 | North America / Mexico / Zacatecas  | Human | Male   | 93 | Ambulatory   | Nasopharyngeal and oropharyngeal swab |
| hCoV-19/Mexico/ZAC_INER_IMSS_00466/2021 | EPI_ISL_1585472 | 17/03/21 | North America / Mexico / Zacatecas  | Human | Male   | 69 | Hospitalized | Nasopharyngeal and oropharyngeal swab |
| hCoV-19/Mexico/ZAC_INER_IMSS_00467/2021 | EPI_ISL_1585473 | 17/03/21 | North America / Mexico / Zacatecas  | Human | Male   | 48 | Ambulatory   | Nasopharyngeal and oropharyngeal swab |
| hCoV-19/Mexico/ZAC_INER_IMSS_00468/2021 | EPI_ISL_1585474 | 17/03/21 | North America / Mexico / Zacatecas  | Human | Male   | 29 | Ambulatory   | Nasopharyngeal and oropharyngeal swab |
| hCoV-19/Mexico/ZAC_INER_IMSS_00469/2021 | EPI_ISL_1585475 | 18/03/21 | North America / Mexico / Zacatecas  | Human | Female | 74 | Ambulatory   | Nasopharyngeal and oropharyngeal swab |
| hCoV-19/Mexico/ZAC_INER_IMSS_00471/2021 | EPI_ISL_1585477 | 17/03/21 | North America / Mexico / Zacatecas  | Human | Female | 77 | Ambulatory   | Nasopharyngeal and oropharyngeal swab |
| hCoV-19/Mexico/ZAC_INER_IMSS_00472/2021 | EPI_ISL_1585478 | 18/03/21 | North America / Mexico / Zacatecas  | Human | Male   | 76 | Hospitalized | Nasopharyngeal and oropharyngeal swab |
| hCoV-19/Mexico/JAL_INER_IMSS_00478/2021 | EPI_ISL_1585482 | 09/03/21 | North America / Mexico / Jalisco    | Human | Male   | 36 | Hospitalized | Nasopharyngeal and oropharyngeal swab |
| hCoV-19/Mexico/JAL_INER_IMSS_00480/2021 | EPI_ISL_1585484 | 08/03/21 | North America / Mexico / Jalisco    | Human | Female | 84 | Hospitalized | Nasopharyngeal and oropharyngeal swab |
| hCoV-19/Mexico/JAL_INER_IMSS_00486/2021 | EPI_ISL_1585489 | 10/03/21 | North America / Mexico / Jalisco    | Human | Female | 35 | Hospitalized | Nasopharyngeal and oropharyngeal swab |
| hCoV-19/Mexico/JAL_INER_IMSS_00487/2021 | EPI_ISL_1585490 | 11/03/21 | North America / Mexico / Jalisco    | Human | Male   | 36 | Ambulatory   | Nasopharyngeal and oropharyngeal swab |
| hCoV-19/Mexico/JAL_INER_IMSS_00488/2021 | EPI_ISL_1585491 | 10/03/21 | North America / Mexico / Jalisco    | Human | Male   | 74 | Hospitalized | Nasopharyngeal and oropharyngeal swab |
| hCoV-19/Mexico/GUA_INER_IMSS_00489/2021 | EPI_ISL_1585492 | 09/03/21 | North America / Mexico / Guanajuato | Human | Female | 51 | Ambulatory   | Oropharyngeal swab                    |
| hCoV-19/Mexico/GUA_INER_IMSS_00491/2021 | EPI_ISL_1585494 | 09/03/21 | North America / Mexico / Guanajuato | Human | Male   | 79 | Hospitalized | Nasopharyngeal and oropharyngeal swab |
| hCoV-19/Mexico/GUA_INER_IMSS_00492/2021 | EPI_ISL_1585495 | 10/03/21 | North America / Mexico / Guanajuato | Human | Male   | 85 | Hospitalized | Nasopharyngeal and oropharyngeal swab |
| hCoV-19/Mexico/GUA_INER_IMSS_00494/2021 | EPI_ISL_1585497 | 03/03/21 | North America / Mexico / Guanajuato | Human | Female | 59 | Hospitalized | Nasopharyngeal and oropharyngeal swab |
| hCoV-19/Mexico/MIC_INER_IMSS_00496/2021 | EPI_ISL_1585499 | 10/03/21 | North America / Mexico / Michoacan  | Human | Female | 75 | Hospitalized | Nasopharyngeal and oropharyngeal swab |
| hCoV-19/Mexico/JAL_INER_IMSS_00502/2021 | EPI_ISL_1585505 | 12/03/21 | North America / Mexico / Jalisco    | Human | Male   | 32 | Hospitalized | Nasopharyngeal and oropharyngeal swab |
| hCoV-19/Mexico/JAL_INER_IMSS_00503/2021 | EPI_ISL_1585506 | 12/03/21 | North America / Mexico / Jalisco    | Human | Female | 60 | Ambulatory   | Nasopharyngeal and oropharyngeal swab |
| hCoV-19/Mexico/GUA_INER_IMSS_00504/2021 | EPI_ISL_1585507 | 11/03/21 | North America / Mexico / Guanajuato | Human | Male   | 75 | Hospitalized | Nasopharyngeal and oropharyngeal swab |
| hCoV-19/Mexico/COL_INER_IMSS_00505/2021 | EPI_ISL_1585508 | 10/03/21 | North America / Mexico / Colima     | Human | Male   | 48 | Hospitalized | Nasopharyngeal and oropharyngeal swab |
| hCoV-19/Mexico/GUA_INER_IMSS_00506/2021 | EPI_ISL_1585509 | 11/03/21 | North America / Mexico / Guanajuato | Human | Male   | 33 | Ambulatory   | Nasopharyngeal and oropharyngeal swab |
| hCoV-19/Mexico/GUA_INER_IMSS_00508/2021 | EPI_ISL_1585511 | 11/03/21 | North America / Mexico / Guanajuato | Human | Male   | 36 | Ambulatory   | Nasopharyngeal and oropharyngeal swab |
| hCoV-19/Mexico/JAL_INER_IMSS_00511/2021 | EPI_ISL_1585514 | 12/03/21 | North America / Mexico / Jalisco    | Human | Male   | 78 | Hospitalized | Nasopharyngeal and oropharyngeal swab |
| hCoV-19/Mexico/JAL_INER_IMSS_00514/2021 | EPI_ISL_1585517 | 14/03/21 | North America / Mexico / Jalisco    | Human | Female | 80 | Hospitalized | Nasopharyngeal and oropharyngeal swab |
| hCoV-19/Mexico/JAL_INER_IMSS_00515/2021 | EPI_ISL_1585518 | 16/03/21 | North America / Mexico / Jalisco    | Human | Male   | 38 | Ambulatory   | Nasopharyngeal and oropharyngeal swab |
| hCoV-19/Mexico/SON_INER_IMSS_00516/2021 | EPI_ISL_1585519 | 11/03/21 | North America / Mexico / Sonora     | Human | Female | 33 | Ambulatory   | Nasopharyngeal swab                   |
| hCoV-19/Mexico/COL_INER_IMSS_00519/2021 | EPI_ISL_1585522 | 15/03/21 | North America / Mexico / Colima     | Human | Male   | 56 | Hospitalized | Nasopharyngeal and oropharyngeal swab |
| hCoV-19/Mexico/JAL_INER_IMSS_00520/2021 | EPI_ISL_1585523 | 15/03/21 | North America / Mexico / Jalisco    | Human | Male   | 91 | Hospitalized | Nasopharyngeal and oropharyngeal swab |



|                                         |                 |          |                                     |       |        |    |              |                                       |
|-----------------------------------------|-----------------|----------|-------------------------------------|-------|--------|----|--------------|---------------------------------------|
| hCoV-19/Mexico/JAL_INER_IMSS_00521/2021 | EPI_ISL_1585524 | 15/03/21 | North America / Mexico / Jalisco    | Human | Male   | 79 | Ambulatory   | Nasopharyngeal and oropharyngeal swab |
| hCoV-19/Mexico/JAL_INER_IMSS_00522/2021 | EPI_ISL_1585525 | 16/03/21 | North America / Mexico / Jalisco    | Human | Female | 54 | Ambulatory   | Nasopharyngeal and oropharyngeal swab |
| hCoV-19/Mexico/JAL_INER_IMSS_00523/2021 | EPI_ISL_1585526 | 17/03/21 | North America / Mexico / Jalisco    | Human | Male   | 61 | Hospitalized | Nasopharyngeal and oropharyngeal swab |
| hCoV-19/Mexico/GUA_INER_IMSS_00524/2021 | EPI_ISL_1585527 | 16/03/21 | North America / Mexico / Guanajuato | Human | Male   | 44 | Ambulatory   | Nasopharyngeal and oropharyngeal swab |
| hCoV-19/Mexico/JAL_INER_IMSS_00525/2021 | EPI_ISL_1585528 | 16/03/21 | North America / Mexico / Jalisco    | Human | Male   | 78 | Hospitalized | Nasopharyngeal and oropharyngeal swab |
| hCoV-19/Mexico/JAL_INER_IMSS_00526/2021 | EPI_ISL_1585529 | 17/03/21 | North America / Mexico / Jalisco    | Human | Male   | 78 | Ambulatory   | Oropharyngeal swab                    |
| hCoV-19/Mexico/GUA_INER_IMSS_00528/2021 | EPI_ISL_1585531 | 16/03/21 | North America / Mexico / Guanajuato | Human | Male   | 30 | Ambulatory   | Nasopharyngeal and oropharyngeal swab |
| hCoV-19/Mexico/SON_INER_IMSS_00529/2021 | EPI_ISL_1585532 | 15/03/21 | North America / Mexico / Sonora     | Human | Male   | 26 | Ambulatory   | Nasopharyngeal swab                   |
| hCoV-19/Mexico/SON_INER_IMSS_00531/2021 | EPI_ISL_1585534 | 05/03/21 | North America / Mexico / Sonora     | Human | Female | 61 | Hospitalized | Oropharyngeal swab                    |
| hCoV-19/Mexico/JAL_INER_IMSS_00533/2021 | EPI_ISL_1585535 | 13/03/21 | North America / Mexico / Jalisco    | Human | Male   | 68 | Hospitalized | Nasopharyngeal swab                   |
| hCoV-19/Mexico/JAL_INER_IMSS_00537/2021 | EPI_ISL_1585539 | 17/03/21 | North America / Mexico / Jalisco    | Human | Male   | 58 | Hospitalized | Nasopharyngeal and oropharyngeal swab |
| hCoV-19/Mexico/JAL_INER_IMSS_00540/2021 | EPI_ISL_1585542 | 18/03/21 | North America / Mexico / Jalisco    | Human | Female | 54 | Ambulatory   | Nasopharyngeal and oropharyngeal swab |
| hCoV-19/Mexico/GUA_INER_IMSS_00542/2021 | EPI_ISL_1585543 | 17/03/21 | North America / Mexico / Guanajuato | Human | Female | 65 | Ambulatory   | Nasopharyngeal and oropharyngeal swab |
| hCoV-19/Mexico/SON_INER_IMSS_00543/2021 | EPI_ISL_1585544 | 16/03/21 | North America / Mexico / Sonora     | Human | Female | 47 | Ambulatory   | Nasopharyngeal swab                   |
| hCoV-19/Mexico/SON_INER_IMSS_00549/2021 | EPI_ISL_1585549 | 17/03/21 | North America / Mexico / Sonora     | Human | Female | 40 | Ambulatory   | Nasopharyngeal and oropharyngeal swab |
| hCoV-19/Mexico/SIN_INER_IMSS_00550/2021 | EPI_ISL_1585550 | 17/03/21 | North America / Mexico / Sinaloa    | Human | Female | 72 | Hospitalized | Nasopharyngeal swab                   |
| hCoV-19/Mexico/SON_INER_IMSS_00552/2021 | EPI_ISL_1585552 | 15/03/21 | North America / Mexico / Sonora     | Human | Female | 85 | Hospitalized | Nasopharyngeal swab                   |
| hCoV-19/Mexico/SON_INER_IMSS_00553/2021 | EPI_ISL_1585553 | 15/03/21 | North America / Mexico / Sonora     | Human | Male   | 71 | Hospitalized | Nasopharyngeal swab                   |
| hCoV-19/Mexico/JAL_INER_IMSS_00556/2021 | EPI_ISL_1585555 | 20/03/21 | North America / Mexico / Jalisco    | Human | Female | 29 | Hospitalized | Nasopharyngeal and oropharyngeal swab |
| hCoV-19/Mexico/JAL_INER_IMSS_00557/2021 | EPI_ISL_1585556 | 20/03/21 | North America / Mexico / Jalisco    | Human | Male   | 85 | Hospitalized | Nasopharyngeal and oropharyngeal swab |
| hCoV-19/Mexico/JAL_INER_IMSS_00558/2021 | EPI_ISL_1585557 | 19/03/21 | North America / Mexico / Jalisco    | Human | Male   | 43 | Hospitalized | Nasopharyngeal and oropharyngeal swab |
| hCoV-19/Mexico/JAL_INER_IMSS_00559/2021 | EPI_ISL_1585558 | 19/03/21 | North America / Mexico / Jalisco    | Human | Male   | 66 | Hospitalized | Nasopharyngeal and oropharyngeal swab |
| hCoV-19/Mexico/JAL_INER_IMSS_00560/2021 | EPI_ISL_1585559 | 19/03/21 | North America / Mexico / Jalisco    | Human | Female | 82 | Hospitalized | Nasopharyngeal and oropharyngeal swab |
| hCoV-19/Mexico/JAL_INER_IMSS_00561/2021 | EPI_ISL_1585560 | 20/03/21 | North America / Mexico / Jalisco    | Human | Male   | 67 | Hospitalized | Nasopharyngeal and oropharyngeal swab |
| hCoV-19/Mexico/JAL_INER_IMSS_00562/2021 | EPI_ISL_1585561 | 20/03/21 | North America / Mexico / Jalisco    | Human | Male   | 62 | Hospitalized | Nasopharyngeal and oropharyngeal swab |
| hCoV-19/Mexico/JAL_INER_IMSS_00563/2021 | EPI_ISL_1585562 | 21/03/21 | North America / Mexico / Jalisco    | Human | Female | 35 | Ambulatory   | Nasopharyngeal and oropharyngeal swab |
| hCoV-19/Mexico/MOR_INER_IMSS_00565/2021 | EPI_ISL_1585564 | 15/03/21 | North America / Mexico / Morelos    | Human | Male   | 62 | Hospitalized | Nasopharyngeal and oropharyngeal swab |
| hCoV-19/Mexico/VER_INER_IMSS_00566/2021 | EPI_ISL_1585565 | 12/03/21 | North America / Mexico / Veracruz   | Human | Male   | 26 | Ambulatory   | Nasopharyngeal and oropharyngeal swab |
| hCoV-19/Mexico/VER_INER_IMSS_00567/2021 | EPI_ISL_1585566 | 16/03/21 | North America / Mexico / Veracruz   | Human | Female | 80 | Hospitalized | Nasopharyngeal and oropharyngeal swab |
| hCoV-19/Mexico/VER_INER_IMSS_00568/2021 | EPI_ISL_1585567 | 14/03/21 | North America / Mexico / Veracruz   | Human | Female | 58 | Hospitalized | Nasopharyngeal and oropharyngeal swab |
| hCoV-19/Mexico/VER_INER_IMSS_00569/2021 | EPI_ISL_1585568 | 15/03/21 | North America / Mexico / Veracruz   | Human | Male   | 80 | Hospitalized | Nasopharyngeal and oropharyngeal swab |
| hCoV-19/Mexico/VER_INER_IMSS_00570/2021 | EPI_ISL_1585569 | 15/03/21 | North America / Mexico / Veracruz   | Human | Female | 66 | Hospitalized | Nasopharyngeal and oropharyngeal swab |
| hCoV-19/Mexico/HID_INER_IMSS_00571/2021 | EPI_ISL_1585570 | 17/03/21 | North America / Mexico / Hidalgo    | Human | Female | 25 | Ambulatory   | Nasopharyngeal and oropharyngeal swab |
| hCoV-19/Mexico/HID_INER_IMSS_00572/2021 | EPI_ISL_1585571 | 17/03/21 | North America / Mexico / Hidalgo    | Human | Male   | 36 | Ambulatory   | Oropharyngeal swab                    |
| hCoV-19/Mexico/HID_INER_IMSS_00573/2021 | EPI_ISL_1585572 | 16/03/21 | North America / Mexico / Hidalgo    | Human | Male   | 90 | Hospitalized | Nasopharyngeal and oropharyngeal swab |
| hCoV-19/Mexico/VER_INER_IMSS_00574/2021 | EPI_ISL_1585573 | 13/03/21 | North America / Mexico / Veracruz   | Human | Male   | 34 | Ambulatory   | Nasopharyngeal swab                   |
| hCoV-19/Mexico/VER_INER_IMSS_00575/2021 | EPI_ISL_1585574 | 13/03/21 | North America / Mexico / Veracruz   | Human | Male   | 30 | Ambulatory   | Nasopharyngeal swab                   |
| hCoV-19/Mexico/VER_INER_IMSS_00576/2021 | EPI_ISL_1585575 | 12/03/21 | North America / Mexico / Veracruz   | Human | Female | 26 | Ambulatory   | Nasopharyngeal and oropharyngeal swab |
| hCoV-19/Mexico/VER_INER_IMSS_00577/2021 | EPI_ISL_1585576 | 12/03/21 | North America / Mexico / Veracruz   | Human | Female | 23 | Ambulatory   | Nasopharyngeal and oropharyngeal swab |
| hCoV-19/Mexico/VER_INER_IMSS_00578/2021 | EPI_ISL_1585577 | 16/03/21 | North America / Mexico / Veracruz   | Human | Male   | 25 | Ambulatory   | Nasopharyngeal and oropharyngeal swab |
| hCoV-19/Mexico/VER_INER_IMSS_00579/2021 | EPI_ISL_1585578 | 16/03/21 | North America / Mexico / Veracruz   | Human | Male   | 46 | Ambulatory   | Nasopharyngeal and oropharyngeal swab |
| hCoV-19/Mexico/VER_INER_IMSS_00580/2021 | EPI_ISL_1585579 | 16/03/21 | North America / Mexico / Veracruz   | Human | Male   | 55 | Ambulatory   | Nasopharyngeal and oropharyngeal swab |
| hCoV-19/Mexico/VER_INER_IMSS_00581/2021 | EPI_ISL_1585580 | 16/03/21 | North America / Mexico / Veracruz   | Human | Male   | 33 | Ambulatory   | Nasopharyngeal and oropharyngeal swab |
| hCoV-19/Mexico/VER_INER_IMSS_00582/2021 | EPI_ISL_1585581 | 16/03/21 | North America / Mexico / Veracruz   | Human | Male   | 53 | Hospitalized | Nasopharyngeal and oropharyngeal swab |

|                                         |                 |          |                                          |       |        |    |              |                                       |
|-----------------------------------------|-----------------|----------|------------------------------------------|-------|--------|----|--------------|---------------------------------------|
| hCoV-19/Mexico/AGU_INER_IMSS_00583/2021 | EPI_ISL_1585582 | 14/03/21 | North America / Mexico / Aguascalientes  | Human | Female | 48 | Ambulatory   | Nasopharyngeal and oropharyngeal swab |
| hCoV-19/Mexico/TLA_INER_IMSS_00585/2021 | EPI_ISL_1585584 | 16/03/21 | North America / Mexico / Tlaxcala        | Human | Male   | 56 | Hospitalized | Nasopharyngeal and oropharyngeal swab |
| hCoV-19/Mexico/TLA_INER_IMSS_00586/2021 | EPI_ISL_1585585 | 16/03/21 | North America / Mexico / Tlaxcala        | Human | Female | 75 | Hospitalized | Nasopharyngeal and oropharyngeal swab |
| hCoV-19/Mexico/TLA_INER_IMSS_00587/2021 | EPI_ISL_1585586 | 17/03/21 | North America / Mexico / Tlaxcala        | Human | Male   | 75 | Hospitalized | Nasopharyngeal and oropharyngeal swab |
| hCoV-19/Mexico/TLA_INER_IMSS_00589/2021 | EPI_ISL_1585587 | 16/03/21 | North America / Mexico / Tlaxcala        | Human | Male   | 59 | Hospitalized | Nasopharyngeal and oropharyngeal swab |
| hCoV-19/Mexico/TLA_INER_IMSS_00590/2021 | EPI_ISL_1585588 | 14/03/21 | North America / Mexico / Tlaxcala        | Human | Female | 52 | Hospitalized | Nasopharyngeal and oropharyngeal swab |
| hCoV-19/Mexico/MOR_INER_IMSS_00592/2021 | EPI_ISL_1585589 | 15/03/21 | North America / Mexico / Morelos         | Human | Female | 80 | Hospitalized | Oropharyngeal swab                    |
| hCoV-19/Mexico/VER_INER_IMSS_00593/2021 | EPI_ISL_1585590 | 16/03/21 | North America / Mexico / Veracruz        | Human | Female | 25 | Ambulatory   | Nasopharyngeal and oropharyngeal swab |
| hCoV-19/Mexico/VER_INER_IMSS_00594/2021 | EPI_ISL_1585591 | 16/03/21 | North America / Mexico / Veracruz        | Human | Male   | 28 | Ambulatory   | Nasopharyngeal and oropharyngeal swab |
| hCoV-19/Mexico/VER_INER_IMSS_00595/2021 | EPI_ISL_1585592 | 15/03/21 | North America / Mexico / Veracruz        | Human | Female | 34 | Hospitalized | Nasopharyngeal and oropharyngeal swab |
| hCoV-19/Mexico/VER_INER_IMSS_00596/2021 | EPI_ISL_1585593 | 14/03/21 | North America / Mexico / Veracruz        | Human | Male   | 32 | Hospitalized | Nasopharyngeal and oropharyngeal swab |
| hCoV-19/Mexico/VER_INER_IMSS_00597/2021 | EPI_ISL_1585594 | 14/03/21 | North America / Mexico / Veracruz        | Human | Female | 23 | Ambulatory   | Nasopharyngeal and oropharyngeal swab |
| hCoV-19/Mexico/SLP_INER_IMSS_00599/2021 | EPI_ISL_1585595 | 18/03/21 | North America / Mexico / San Luis Potosi | Human | Female | 83 | Hospitalized | Nasopharyngeal and oropharyngeal swab |
| hCoV-19/Mexico/SLP_INER_IMSS_00600/2021 | EPI_ISL_1585597 | 12/03/21 | North America / Mexico / San Luis Potosi | Human | Male   | 86 | Hospitalized | Nasopharyngeal and oropharyngeal swab |
| hCoV-19/Mexico/MEX_INER_IMSS_00601/2021 | EPI_ISL_1585598 | 18/03/21 | North America / Mexico / State of Mexico | Human | Male   | 40 | Ambulatory   | Nasopharyngeal and oropharyngeal swab |
| hCoV-19/Mexico/TLA_INER_IMSS_00602/2021 | EPI_ISL_1585599 | 17/03/21 | North America / Mexico / Tlaxcala        | Human | Male   | 66 | Hospitalized | Nasopharyngeal and oropharyngeal swab |
| hCoV-19/Mexico/TLA_INER_IMSS_00603/2021 | EPI_ISL_1585600 | 17/03/21 | North America / Mexico / Tlaxcala        | Human | Male   | 33 | Hospitalized | Nasopharyngeal and oropharyngeal swab |
| hCoV-19/Mexico/SLP_INER_IMSS_00606/2021 | EPI_ISL_1585603 | 18/03/21 | North America / Mexico / San Luis Potosi | Human | Male   | 64 | Hospitalized | Nasopharyngeal and oropharyngeal swab |
| hCoV-19/Mexico/SLP_INER_IMSS_00607/2021 | EPI_ISL_1585604 | 17/03/21 | North America / Mexico / San Luis Potosi | Human | Female | 53 | Ambulatory   | Nasopharyngeal and oropharyngeal swab |
| hCoV-19/Mexico/SLP_INER_IMSS_00608/2021 | EPI_ISL_1585605 | 16/03/21 | North America / Mexico / San Luis Potosi | Human | Male   | 31 | Ambulatory   | Nasopharyngeal and oropharyngeal swab |
| hCoV-19/Mexico/SLP_INER_IMSS_00609/2021 | EPI_ISL_1585606 | 16/03/21 | North America / Mexico / San Luis Potosi | Human | Female | 53 | Ambulatory   | Nasopharyngeal and oropharyngeal swab |
| hCoV-19/Mexico/MEX_INER_IMSS_00610/2021 | EPI_ISL_1585607 | 18/03/21 | North America / Mexico / State of Mexico | Human | Male   | 64 | Hospitalized | Nasopharyngeal swab                   |
| hCoV-19/Mexico/MEX_INER_IMSS_00611/2021 | EPI_ISL_1585608 | 19/03/21 | North America / Mexico / State of Mexico | Human | Male   | 40 | Ambulatory   | Oropharyngeal swab                    |
| hCoV-19/Mexico/MEX_INER_IMSS_00612/2021 | EPI_ISL_1585609 | 18/03/21 | North America / Mexico / State of Mexico | Human | Male   | 37 | Ambulatory   | Oropharyngeal swab                    |
| hCoV-19/Mexico/MEX_INER_IMSS_00614/2021 | EPI_ISL_1585611 | 18/03/21 | North America / Mexico / State of Mexico | Human | Male   | 58 | Ambulatory   | Nasopharyngeal and oropharyngeal swab |
| hCoV-19/Mexico/VER_INER_IMSS_00616/2021 | EPI_ISL_1585613 | 17/03/21 | North America / Mexico / Veracruz        | Human | Female | 37 | Ambulatory   | Nasopharyngeal and oropharyngeal swab |
| hCoV-19/Mexico/HID_INER_IMSS_00617/2021 | EPI_ISL_1585614 | 18/03/21 | North America / Mexico / Hidalgo         | Human | Male   | 72 | Hospitalized | Oropharyngeal swab                    |
| hCoV-19/Mexico/HID_INER_IMSS_00618/2021 | EPI_ISL_1585615 | 17/03/21 | North America / Mexico / Hidalgo         | Human | Female | 64 | Hospitalized | Nasopharyngeal and oropharyngeal swab |
| hCoV-19/Mexico/HID_INER_IMSS_00619/2021 | EPI_ISL_1585616 | 18/03/21 | North America / Mexico / Hidalgo         | Human | Male   | 43 | Hospitalized | Nasopharyngeal and oropharyngeal swab |
| hCoV-19/Mexico/MOR_INER_IMSS_00620/2021 | EPI_ISL_1585617 | 17/03/21 | North America / Mexico / Morelos         | Human | Male   | 38 | Hospitalized | Nasopharyngeal and oropharyngeal swab |
| hCoV-19/Mexico/GRO_INER_IMSS_00621/2021 | EPI_ISL_1585618 | 19/03/21 | North America / Mexico / Guerrero        | Human | Male   | 48 | Ambulatory   | Nasopharyngeal and oropharyngeal swab |
| hCoV-19/Mexico/GRO_INER_IMSS_00622/2021 | EPI_ISL_1585619 | 17/03/21 | North America / Mexico / Guerrero        | Human | Female | 52 | Ambulatory   | Nasopharyngeal and oropharyngeal swab |
| hCoV-19/Mexico/SLP_INER_IMSS_00623/2021 | EPI_ISL_1585620 | 18/03/21 | North America / Mexico / San Luis Potosi | Human | Male   | 0  | Hospitalized | Nasopharyngeal and oropharyngeal swab |
| hCoV-19/Mexico/GRO_INER_IMSS_00624/2021 | EPI_ISL_1585621 | 19/03/21 | North America / Mexico / Guerrero        | Human | Male   | 86 | Hospitalized | Nasopharyngeal and oropharyngeal swab |
| hCoV-19/Mexico/GRO_INER_IMSS_00625/2021 | EPI_ISL_1585622 | 19/03/21 | North America / Mexico / Guerrero        | Human | Male   | 45 | Ambulatory   | Nasopharyngeal and oropharyngeal swab |
| hCoV-19/Mexico/SLP_INER_IMSS_00626/2021 | EPI_ISL_1585623 | 18/03/21 | North America / Mexico / San Luis Potosi | Human | Female | 79 | Hospitalized | Nasopharyngeal and oropharyngeal swab |
| hCoV-19/Mexico/SLP_INER_IMSS_00627/2021 | EPI_ISL_1585624 | 16/03/21 | North America / Mexico / San Luis Potosi | Human | Male   | 45 | Hospitalized | Nasopharyngeal and oropharyngeal swab |
| hCoV-19/Mexico/TLA_INER_IMSS_00629/2021 | EPI_ISL_1585626 | 19/03/21 | North America / Mexico / Tlaxcala        | Human | Male   | 49 | Hospitalized | Nasopharyngeal and oropharyngeal swab |
| hCoV-19/Mexico/MEX_INER_IMSS_00631/2021 | EPI_ISL_1585627 | 20/03/21 | North America / Mexico / State of Mexico | Human | Male   | 73 | Hospitalized | Nasopharyngeal and oropharyngeal swab |
| hCoV-19/Mexico/CMX_INER_IMSS_00632/2021 | EPI_ISL_1585628 | 20/03/21 | North America / Mexico / Mexico City     | Human | Male   | 64 | Hospitalized | Nasopharyngeal and oropharyngeal swab |
| hCoV-19/Mexico/MEX_INER_IMSS_00633/2021 | EPI_ISL_1585629 | 18/03/21 | North America / Mexico / State of Mexico | Human | Male   | 70 | Hospitalized | Nasopharyngeal and oropharyngeal swab |
| hCoV-19/Mexico/VER_INER_IMSS_00634/2021 | EPI_ISL_1585630 | 18/03/21 | North America / Mexico / Veracruz        | Human | Male   | 85 | Hospitalized | Nasopharyngeal and oropharyngeal swab |
| hCoV-19/Mexico/AGU_INER_IMSS_00635/2021 | EPI_ISL_1585631 | 18/03/21 | North America / Mexico / Aguascalientes  | Human | Male   | 52 | Ambulatory   | Nasopharyngeal and oropharyngeal swab |
| hCoV-19/Mexico/QUE_INER_IMSS_00636/2021 | EPI_ISL_1585632 | 19/03/21 | North America / Mexico / Queretaro       | Human | Male   | 38 | Hospitalized | Nasopharyngeal and oropharyngeal swab |

|                                          |                 |          |                                          |       |        |    |              |                                       |
|------------------------------------------|-----------------|----------|------------------------------------------|-------|--------|----|--------------|---------------------------------------|
| hCoV-19/Mexico/QUE_INER_IMSS_00637/2021  | EPI_ISL_1585633 | 19/03/21 | North America / Mexico / Queretaro       | Human | Male   | 85 | Hospitalized | Nasopharyngeal and oropharyngeal swab |
| hCoV-19/Mexico/MEX_INER_IMSS_00638/2021  | EPI_ISL_1585634 | 19/03/21 | North America / Mexico / State of Mexico | Human | Male   | 68 | Hospitalized | Nasopharyngeal and oropharyngeal swab |
| hCoV-19/Mexico/MEX_INER_IMSS_00639/2021  | EPI_ISL_1585635 | 20/03/21 | North America / Mexico / State of Mexico | Human | Female | 83 | Hospitalized | Nasopharyngeal and oropharyngeal swab |
| hCoV-19/Mexico/CMX_INER_IMSS_00640/2021  | EPI_ISL_1585636 | 20/03/21 | North America / Mexico / Mexico City     | Human | Male   | 75 | Hospitalized | Nasopharyngeal and oropharyngeal swab |
| hCoV-19/Mexico/CMX_INER_IMSS_00641/2021  | EPI_ISL_1585637 | 20/03/21 | North America / Mexico / Mexico City     | Human | Male   | 34 | Ambulatory   | Oropharyngeal swab                    |
| hCoV-19/Mexico/MOR_INER_IMSS_00642/2021  | EPI_ISL_1585638 | 18/03/21 | North America / Mexico / Morelos         | Human | Male   | 86 | Hospitalized | Nasopharyngeal and oropharyngeal swab |
| hCoV-19/Mexico/CMX_INER_IMSS_00643/2021  | EPI_ISL_1585639 | 20/03/21 | North America / Mexico / Mexico City     | Human | Male   | 47 | Hospitalized | Oropharyngeal swab                    |
| hCoV-19/Mexico/MOR_INER_IMSS_00645/2021  | EPI_ISL_1585640 | 19/03/21 | North America / Mexico / Morelos         | Human | Male   | 35 | Hospitalized | Nasopharyngeal and oropharyngeal swab |
| hCoV-19/Mexico/MOR_INER_IMSS_00646/2021  | EPI_ISL_1585641 | 17/03/21 | North America / Mexico / Morelos         | Human | Male   | 31 | Hospitalized | Nasopharyngeal and oropharyngeal swab |
| hCoV-19/Mexico/MOR_INER_IMSS_00647/2021  | EPI_ISL_1585642 | 17/03/21 | North America / Mexico / Morelos         | Human | Female | 59 | Hospitalized | Nasopharyngeal and oropharyngeal swab |
| hCoV-19/Mexico/MOR_INER_IMSS_00648/2021  | EPI_ISL_1585643 | 18/03/21 | North America / Mexico / Morelos         | Human | Female | 68 | Hospitalized | Nasopharyngeal and oropharyngeal swab |
| hCoV-19/Mexico/HID_INER_IMSS_00649/2021  | EPI_ISL_1585644 | 18/03/21 | North America / Mexico / Hidalgo         | Human | Female | 42 | Hospitalized | Nasopharyngeal and oropharyngeal swab |
| hCoV-19/Mexico/MEX_INER_IMSS_00650/2021  | EPI_ISL_1585645 | 18/03/21 | North America / Mexico / State of Mexico | Human | Female | 59 | Hospitalized | Nasopharyngeal and oropharyngeal swab |
| hCoV-19/Mexico/MEX_INER_IMSS_00651/2021  | EPI_ISL_1585646 | 21/03/21 | North America / Mexico / State of Mexico | Human | Male   | 88 | Hospitalized | Nasopharyngeal and oropharyngeal swab |
| hCoV-19/Mexico/MEX_INER_IMSS_00653/2021  | EPI_ISL_1585648 | 21/03/21 | North America / Mexico / State of Mexico | Human | Male   | 65 | Hospitalized | Nasopharyngeal and oropharyngeal swab |
| hCoV-19/Mexico/MEX_INER_IMSS_00654/2021  | EPI_ISL_1585649 | 19/03/21 | North America / Mexico / State of Mexico | Human | Female | 58 | Hospitalized | Nasopharyngeal and oropharyngeal swab |
| hCoV-19/Mexico/CMX_INER_IMSS_00655/2021  | EPI_ISL_1585650 | 20/03/21 | North America / Mexico / Mexico City     | Human | Male   | 77 | Hospitalized | Nasopharyngeal swab                   |
| hCoV-19/Mexico/CMX_INER_IMSS_00656/2021  | EPI_ISL_1585651 | 20/03/21 | North America / Mexico / Mexico City     | Human | Female | 57 | Hospitalized | Nasopharyngeal swab                   |
| hCoV-19/Mexico/CMX_INER_IMSS_00657/2021  | EPI_ISL_1585652 | 20/03/21 | North America / Mexico / Mexico City     | Human | Female | 46 | Hospitalized | Nasopharyngeal swab                   |
| hCoV-19/Mexico/CMX_INER_IMSS_00658/2021  | EPI_ISL_1585653 | 21/03/21 | North America / Mexico / Mexico City     | Human | Female | 66 | Hospitalized | Nasopharyngeal swab                   |
| hCoV-19/Mexico/CMX_INER_IMSS_00659/2021  | EPI_ISL_1585654 | 20/03/21 | North America / Mexico / Mexico City     | Human | Male   | 70 | Hospitalized | Oropharyngeal swab                    |
| hCoV-19/Mexico/CMX_INER_IMSS_00660/2021  | EPI_ISL_1585655 | 21/03/21 | North America / Mexico / Mexico City     | Human | Female | 34 | Hospitalized | Oropharyngeal swab                    |
| hCoV-19/Mexico/CMX_INER_IMSS_00661/2021  | EPI_ISL_1585656 | 21/03/21 | North America / Mexico / Mexico City     | Human | Female | 49 | Hospitalized | Oropharyngeal swab                    |
| hCoV-19/Mexico/CMX_INER_IMSS_00662/2021  | EPI_ISL_1585657 | 20/03/21 | North America / Mexico / Mexico City     | Human | Female | 44 | Hospitalized | Oropharyngeal swab                    |
| hCoV-19/Mexico/SLP_INER_IMSS_00664/2021  | EPI_ISL_1585659 | 18/03/21 | North America / Mexico / San Luis Potosi | Human | Male   | 84 | Hospitalized | Nasopharyngeal and oropharyngeal swab |
| hCoV-19/Mexico/TLA_INER_IMSS_00665/2021  | EPI_ISL_1585660 | 19/03/21 | North America / Mexico / Tlaxcala        | Human | Male   | 79 | Hospitalized | Nasopharyngeal and oropharyngeal swab |
| hCoV-19/Mexico/CMX_INER_IMSS_00666/2021  | EPI_ISL_1585661 | 20/03/21 | North America / Mexico / Mexico City     | Human | Female | 72 | Hospitalized | Nasopharyngeal and oropharyngeal swab |
| hCoV-19/Mexico/CMX_INER_IMSS_00667/2021  | EPI_ISL_1585662 | 20/03/21 | North America / Mexico / Mexico City     | Human | Female | 67 | Hospitalized | Nasopharyngeal and oropharyngeal swab |
| hCoV-19/Mexico/CMX_INER_IMSS_00668/2021  | EPI_ISL_1585663 | 19/03/21 | North America / Mexico / Mexico City     | Human | Male   | 31 | Ambulatory   | Nasopharyngeal and oropharyngeal swab |
| hCoV-19/Mexico/CMX_INER_IMSS_00669/2021  | EPI_ISL_1585664 | 19/03/21 | North America / Mexico / Mexico City     | Human | Female | 31 | Ambulatory   | Nasopharyngeal and oropharyngeal swab |
| hCoV-19/Mexico/CMX_INER_IMSS_00670/2021  | EPI_ISL_1585665 | 21/03/21 | North America / Mexico / Mexico City     | Human | Female | 65 | Ambulatory   | Oropharyngeal swab                    |
| hCoV-19/Mexico/OAX_INER_IMSS_00671/2021  | EPI_ISL_1585666 | 19/03/21 | North America / Mexico / Oaxaca          | Human | Male   | 33 | Ambulatory   | Nasopharyngeal and oropharyngeal swab |
| hCoV-19/Mexico/CMX_INER_IMSS_00672/2021  | EPI_ISL_1585667 | 19/03/21 | North America / Mexico / Mexico City     | Human | Male   | 48 | Ambulatory   | Nasopharyngeal and oropharyngeal swab |
| hCoV-19/Mexico/MEX_INER_IMSS_00673/2021  | EPI_ISL_1585668 | 20/03/21 | North America / Mexico / State of Mexico | Human | Female | 50 | Hospitalized | Oropharyngeal swab                    |
| hCoV-19/Mexico/CMX_INER_IMSS_00674/2021  | EPI_ISL_1585669 | 19/03/21 | North America / Mexico / Mexico City     | Human | Male   | 30 | Ambulatory   | Oropharyngeal swab                    |
| hCoV-19/Mexico/CMX_INER_IMSS_00675/2021  | EPI_ISL_1585670 | 19/03/21 | North America / Mexico / Mexico City     | Human | Female | 62 | Hospitalized | Nasopharyngeal and oropharyngeal swab |
| hCoV-19/Mexico/CMX-INMEGEN-03-11-01/2021 | EPI_ISL_1591460 | 17/02/21 | North America / Mexico / Mexico City     | Human | Female | 26 | unknown      | Oropharyngeal swab                    |
| hCoV-19/Mexico/CMX-INMEGEN-03-11-02/2021 | EPI_ISL_1591461 | 18/02/21 | North America / Mexico / Mexico City     | Human | Male   | 59 | unknown      | Oropharyngeal swab                    |
| hCoV-19/Mexico/CMX-INMEGEN-03-11-03/2021 | EPI_ISL_1591462 | 22/02/21 | North America / Mexico / Mexico City     | Human | Male   | 21 | unknown      | Oropharyngeal swab                    |
| hCoV-19/Mexico/CMX-INMEGEN-03-11-04/2021 | EPI_ISL_1591463 | 25/02/21 | North America / Mexico / Mexico City     | Human | Male   | 13 | unknown      | Oropharyngeal swab                    |
| hCoV-19/Mexico/CMX-INMEGEN-03-11-05/2021 | EPI_ISL_1591464 | 02/03/21 | North America / Mexico / Mexico City     | Human | Female | 23 | unknown      | Oropharyngeal swab                    |
| hCoV-19/Mexico/CMX-INMEGEN-03-11-06/2021 | EPI_ISL_1591465 | 01/03/21 | North America / Mexico / Mexico City     | Human | Female | 45 | unknown      | Oropharyngeal swab                    |
| hCoV-19/Mexico/CMX-INMEGEN-03-11-07/2021 | EPI_ISL_1591466 | 02/03/21 | North America / Mexico / Mexico City     | Human | Male   | 28 | unknown      | Oropharyngeal swab                    |
| hCoV-19/Mexico/CMX-INMEGEN-03-11-08/2021 | EPI_ISL_1591467 | 26/02/21 | North America / Mexico / Mexico City     | Human | Female | 23 | unknown      | Oropharyngeal swab                    |













|                                            |                 |          |                                              |       |        |    |            |                                       |
|--------------------------------------------|-----------------|----------|----------------------------------------------|-------|--------|----|------------|---------------------------------------|
| hCoV-19/Mexico/CMX-INMEGEN-03-11-373/2021  | EPI_ISL_1591708 | 29/03/21 | North America / Mexico / Mexico City         | Human | Female | 46 | unknown    | Oropharyngeal swab                    |
| hCoV-19/Mexico/CMX-INMEGEN-03-11-374/2021  | EPI_ISL_1591709 | 29/03/21 | North America / Mexico / Mexico City         | Human | Female | 67 | unknown    | Oropharyngeal swab                    |
| hCoV-19/Mexico/CMX-INMEGEN-03-11-375/2021  | EPI_ISL_1591710 | 31/03/21 | North America / Mexico / Mexico City         | Human | Male   | 24 | unknown    | Oropharyngeal swab                    |
| hCoV-19/Mexico/CMX-INMEGEN-03-11-376/2021  | EPI_ISL_1591711 | 02/04/21 | North America / Mexico / Mexico City         | Human | Female | 55 | unknown    | Oropharyngeal swab                    |
| hCoV-19/Mexico/CMX-INMEGEN-03-11-377/2021  | EPI_ISL_1591712 | 01/04/21 | North America / Mexico / Mexico City         | Human | Male   | 83 | unknown    | Oropharyngeal swab                    |
| hCoV-19/Mexico/CMX-INMEGEN-03-11-378/2021  | EPI_ISL_1591713 | 02/04/21 | North America / Mexico / Mexico City         | Human | Male   | 54 | unknown    | Oropharyngeal swab                    |
| hCoV-19/Mexico/CMX-INMEGEN-03-11-380/2021  | EPI_ISL_1591715 | 26/03/21 | North America / Mexico / Mexico City         | Human | Male   | 65 | unknown    | Oropharyngeal swab                    |
| hCoV-19/Mexico/CMX-INMEGEN-03-11-381/2021  | EPI_ISL_1591716 | 29/03/21 | North America / Mexico / Mexico City         | Human | Female | 51 | unknown    | Oropharyngeal swab                    |
| hCoV-19/Mexico/CMX-INMEGEN-03-11-382/2021  | EPI_ISL_1591717 | 29/03/21 | North America / Mexico / Mexico City         | Human | Male   | 48 | unknown    | Oropharyngeal swab                    |
| hCoV-19/Mexico/CMX-INMEGEN-03-10-01/2021   | EPI_ISL_1594356 | 22/03/21 | North America / Mexico / Mexico City         | Human | Male   | 46 | unknown    | Oropharyngeal swab                    |
| hCoV-19/Mexico/CMX-INMEGEN-03-10-02/2021   | EPI_ISL_1594357 | 22/03/21 | North America / Mexico / Mexico City         | Human | Female | 55 | unknown    | Oropharyngeal swab                    |
| hCoV-19/Mexico/CMX-INMEGEN-03-10-10/2021   | EPI_ISL_1594358 | 22/03/21 | North America / Mexico / Mexico City         | Human | Male   | 50 | unknown    | Oropharyngeal swab                    |
| hCoV-19/Mexico/CMX-INMEGEN-03-10-17/2021   | EPI_ISL_1594359 | 22/03/21 | North America / Mexico / Mexico City         | Human | Female | 20 | unknown    | Oropharyngeal swab                    |
| hCoV-19/Mexico/CMX-INMEGEN-03-10-18/2021   | EPI_ISL_1594360 | 22/03/21 | North America / Mexico / Mexico City         | Human | Male   | 53 | unknown    | Oropharyngeal swab                    |
| hCoV-19/Mexico/CMX-INMEGEN-03-10-25/2021   | EPI_ISL_1594361 | 22/03/21 | North America / Mexico / Mexico City         | Human | Female | 54 | unknown    | Oropharyngeal swab                    |
| hCoV-19/Mexico/CMX-INMEGEN-03-10-26/2021   | EPI_ISL_1594362 | 22/03/21 | North America / Mexico / Mexico City         | Human | Female | 78 | unknown    | Oropharyngeal swab                    |
| hCoV-19/Mexico/CMX-INMEGEN-03-10-33/2021   | EPI_ISL_1594363 | 22/03/21 | North America / Mexico / Mexico City         | Human | Male   | 56 | unknown    | Oropharyngeal swab                    |
| hCoV-19/Mexico/CMX-INMEGEN-03-10-34/2021   | EPI_ISL_1594364 | 23/03/21 | North America / Mexico / Mexico City         | Human | Male   | 58 | unknown    | Oropharyngeal swab                    |
| hCoV-19/Mexico/CMX-INMEGEN-03-10-41/2021   | EPI_ISL_1594365 | 22/03/21 | North America / Mexico / Mexico City         | Human | Male   | 46 | unknown    | Oropharyngeal swab                    |
| hCoV-19/Mexico/CMX-INMEGEN-03-10-42/2021   | EPI_ISL_1594366 | 23/03/21 | North America / Mexico / Mexico City         | Human | Female | 78 | unknown    | Oropharyngeal swab                    |
| hCoV-19/Mexico/CMX-INMEGEN-03-10-49/2021   | EPI_ISL_1594367 | 22/03/21 | North America / Mexico / Mexico City         | Human | Male   | 59 | unknown    | Oropharyngeal swab                    |
| hCoV-19/Mexico/CMX-INMEGEN-03-10-50/2021   | EPI_ISL_1594368 | 23/03/21 | North America / Mexico / Mexico City         | Human | Female | 51 | unknown    | Oropharyngeal swab                    |
| hCoV-19/Mexico/CMX-INMEGEN-03-10-57/2021   | EPI_ISL_1594369 | 22/03/21 | North America / Mexico / Mexico City         | Human | Female | 56 | unknown    | Oropharyngeal swab                    |
| hCoV-19/Mexico/CMX-INMEGEN-03-10-58/2021   | EPI_ISL_1594370 | 23/03/21 | North America / Mexico / Mexico City         | Human | Female | 39 | unknown    | Oropharyngeal swab                    |
| hCoV-19/Mexico/CMX-INMEGEN-03-10-65/2021   | EPI_ISL_1594371 | 22/03/21 | North America / Mexico / Mexico City         | Human | Female | 45 | unknown    | Oropharyngeal swab                    |
| hCoV-19/Mexico/CMX-INMEGEN-03-10-66/2021   | EPI_ISL_1594372 | 23/03/21 | North America / Mexico / Mexico City         | Human | Female | 55 | unknown    | Oropharyngeal swab                    |
| hCoV-19/Mexico/CMX-INMEGEN-03-10-73/2021   | EPI_ISL_1594373 | 22/03/21 | North America / Mexico / Mexico City         | Human | Female | 33 | unknown    | Oropharyngeal swab                    |
| hCoV-19/Mexico/CMX-INMEGEN-03-10-74/2021   | EPI_ISL_1594374 | 23/03/21 | North America / Mexico / Mexico City         | Human | Female | 74 | unknown    | Oropharyngeal swab                    |
| hCoV-19/Mexico/CMX-INMEGEN-03-10-81/2021   | EPI_ISL_1594375 | 22/03/21 | North America / Mexico / Mexico City         | Human | Female | 45 | unknown    | Oropharyngeal swab                    |
| hCoV-19/Mexico/CMX-INMEGEN-03-10-82/2021   | EPI_ISL_1594376 | 23/03/21 | North America / Mexico / Mexico City         | Human | Female | 47 | unknown    | Oropharyngeal swab                    |
| hCoV-19/Mexico/CMX-INMEGEN-03-10-89/2021   | EPI_ISL_1594377 | 22/03/21 | North America / Mexico / Mexico City         | Human | Female | 55 | unknown    | Oropharyngeal swab                    |
| hCoV-19/Mexico/CMX-INMEGEN-03-10-90/2021   | EPI_ISL_1594378 | 23/03/21 | North America / Mexico / Mexico City         | Human | Male   | 76 | unknown    | Oropharyngeal swab                    |
| hCoV-19/Mexico/CHH_INER_IMSS_00379/2021    | EPI_ISL_1595596 | 03/03/21 | North America / Mexico / Chihuahua           | Human | Male   | 52 | Ambulatory | Nasopharyngeal and oropharyngeal swab |
| hCoV-19/Mexico/COL_INER_IMSS_00532/2021    | EPI_ISL_1595604 | 13/03/21 | North America / Mexico / Colima              | Human | Female | 73 | Ambulatory | Nasopharyngeal and oropharyngeal swab |
| hCoV-19/Mexico/CMX-INMEGEN-03-11-208/2021  | EPI_ISL_1615069 | 24/03/21 | North America / Mexico / Mexico City         | Human | Male   | 52 | unknown    | Oropharyngeal swab                    |
| hCoV-19/Mexico/BCS-InDRE_F12237_S1204/2021 | EPI_ISL_1626811 | 20/03/21 | North America / Mexico / Baja California Sur | Human | Female | 58 | Released   | Oropharyngeal swab                    |
| hCoV-19/Mexico/BCS-InDRE_F12241_S1206/2021 | EPI_ISL_1626813 | 20/03/21 | North America / Mexico / Baja California Sur | Human | Female | 20 | Released   | Oropharyngeal swab                    |
| hCoV-19/Mexico/SIN_CIAD_ID1978/2021        | EPI_ISL_1627081 | 19/03/21 | North America / Mexico / Sinaloa / Mazatlan  | Human | Male   | 70 | unknown    | Oropharyngeal swab                    |
| hCoV-19/Mexico/SIN_CIAD_S6374/2021         | EPI_ISL_1627082 | 23/03/21 | North America / Mexico / Sinaloa / Mazatlan  | Human | Male   | 45 | unknown    | Oropharyngeal swab                    |
| hCoV-19/Mexico/SIN_CIAD_S6436/2021         | EPI_ISL_1627085 | 30/03/21 | North America / Mexico / Sinaloa / Mazatlan  | Human | Male   | 42 | unknown    | Oropharyngeal swab                    |
| hCoV-19/Mexico/CMX-INMEGEN-04-04-1/2021    | EPI_ISL_1628520 | 18/02/21 | North America / Mexico / Mexico City         | Human | Male   | 66 | unknown    | Oropharyngeal swab                    |
| hCoV-19/Mexico/CMX-INMEGEN-04-04-4/2021    | EPI_ISL_1628523 | 03/03/21 | North America / Mexico / Mexico City         | Human | Female | 44 | unknown    | Oropharyngeal swab                    |
| hCoV-19/Mexico/CMX-INMEGEN-04-04-5/2021    | EPI_ISL_1628524 | 05/04/21 | North America / Mexico / Mexico City         | Human | Female | 53 | unknown    | Oropharyngeal swab                    |
| hCoV-19/Mexico/CMX-INMEGEN-04-04-6/2021    | EPI_ISL_1628525 | 05/04/21 | North America / Mexico / Mexico City         | Human | Male   | 54 | unknown    | Oropharyngeal swab                    |







|                                                              |          |                                          |       |        |    |              |                    |
|--------------------------------------------------------------|----------|------------------------------------------|-------|--------|----|--------------|--------------------|
| 20V-19/Mexico/CMX-INMEGEN-InDRE-04-04-174/20:EPI_ISL_1628669 | 06/04/21 | North America / Mexico / Mexico City     | Human | Male   | 51 | unknown      | Oropharyngeal swab |
| 20V-19/Mexico/CMX-INMEGEN-InDRE-04-04-175/20:EPI_ISL_1628670 | 05/04/21 | North America / Mexico / Mexico City     | Human | Male   | 35 | unknown      | Oropharyngeal swab |
| 20V-19/Mexico/CMX-INMEGEN-InDRE-04-04-176/20:EPI_ISL_1628671 | 05/04/21 | North America / Mexico / Mexico City     | Human | Female | 25 | unknown      | Oropharyngeal swab |
| 20V-19/Mexico/CMX-INMEGEN-InDRE-04-04-177/20:EPI_ISL_1628672 | 05/04/21 | North America / Mexico / Mexico City     | Human | Male   | 55 | unknown      | Oropharyngeal swab |
| 20V-19/Mexico/CMX-INMEGEN-InDRE-04-04-178/20:EPI_ISL_1628673 | 05/04/21 | North America / Mexico / Mexico City     | Human | Female | 31 | unknown      | Oropharyngeal swab |
| 20V-19/Mexico/CMX-INMEGEN-InDRE-04-04-179/20:EPI_ISL_1628674 | 05/04/21 | North America / Mexico / Mexico City     | Human | Male   | 29 | unknown      | Oropharyngeal swab |
| 20V-19/Mexico/CMX-INMEGEN-InDRE-04-04-181/20:EPI_ISL_1628675 | 05/04/21 | North America / Mexico / Mexico City     | Human | Female | 59 | unknown      | Oropharyngeal swab |
| 20V-19/Mexico/CMX-INMEGEN-InDRE-04-04-182/20:EPI_ISL_1628676 | 04/04/21 | North America / Mexico / Mexico City     | Human | Male   | 39 | unknown      | Oropharyngeal swab |
| 20V-19/Mexico/CMX-INMEGEN-InDRE-04-04-183/20:EPI_ISL_1628677 | 04/04/21 | North America / Mexico / Mexico City     | Human | Female | 24 | unknown      | Oropharyngeal swab |
| 20V-19/Mexico/CMX-INMEGEN-InDRE-04-04-184/20:EPI_ISL_1628678 | 06/04/21 | North America / Mexico / Mexico City     | Human | Female | 25 | unknown      | Oropharyngeal swab |
| 20V-19/Mexico/CMX-INMEGEN-InDRE-04-04-185/20:EPI_ISL_1628679 | 06/04/21 | North America / Mexico / Mexico City     | Human | Female | 49 | unknown      | Oropharyngeal swab |
| 20V-19/Mexico/CMX-INMEGEN-InDRE-04-04-186/20:EPI_ISL_1628680 | 06/04/21 | North America / Mexico / Mexico City     | Human | Female | 35 | unknown      | Oropharyngeal swab |
| 20V-19/Mexico/CMX-INMEGEN-InDRE-04-04-187/20:EPI_ISL_1628681 | 06/04/21 | North America / Mexico / Mexico City     | Human | Female | 27 | unknown      | Oropharyngeal swab |
| 20V-19/Mexico/CMX-INMEGEN-InDRE-04-04-188/20:EPI_ISL_1628682 | 06/04/21 | North America / Mexico / Mexico City     | Human | Female | 41 | unknown      | Oropharyngeal swab |
| 20V-19/Mexico/MEX-INMEGEN-InDRE-04-04-189/20:EPI_ISL_1628683 | 06/04/21 | North America / Mexico / State of Mexico | Human | Male   | 75 | unknown      | Oropharyngeal swab |
| 20V-19/Mexico/CMX-INMEGEN-InDRE-04-04-190/20:EPI_ISL_1628684 | 06/04/21 | North America / Mexico / Mexico City     | Human | Female | 55 | unknown      | Oropharyngeal swab |
| hCoV-19/Mexico/CHP-InDRE_F11915_S1209/2021:EPI_ISL_1651229   | 14/03/21 | North America / Mexico / Chiapas         | Human | Female | 63 | Hospitalized | Oropharyngeal swab |
| hCoV-19/Mexico/CHP-InDRE_F11917_S1217/2021:EPI_ISL_1651230   | 16/03/21 | North America / Mexico / Chiapas         | Human | Female | 50 | Released     | Oropharyngeal swab |
| hCoV-19/Mexico/PUE-InDRE_F11926_S1218/2021:EPI_ISL_1651231   | 16/03/21 | North America / Mexico / Puebla          | Human | Male   | 63 | Hospitalized | Oropharyngeal swab |
| hCoV-19/Mexico/PUE-InDRE_F11929_S1219/2021:EPI_ISL_1651232   | 14/03/21 | North America / Mexico / Puebla          | Human | Female | 87 | Deceased     | Oropharyngeal swab |
| hCoV-19/Mexico/PUE-InDRE_F11931_S1220/2021:EPI_ISL_1651233   | 16/03/21 | North America / Mexico / Puebla          | Human | Male   | 54 | Hospitalized | Oropharyngeal swab |
| hCoV-19/Mexico/PUE-InDRE_F11932_S1221/2021:EPI_ISL_1651234   | 17/03/21 | North America / Mexico / Puebla          | Human | Male   | 41 | Released     | Oropharyngeal swab |
| hCoV-19/Mexico/NLE-InDRE_F11938_S1222/2021:EPI_ISL_1651235   | 16/03/21 | North America / Mexico / Nuevo Leon      | Human | Male   | 56 | Hospitalized | Oropharyngeal swab |
| hCoV-19/Mexico/NLE-InDRE_F11939_S1223/2021:EPI_ISL_1651236   | 15/03/21 | North America / Mexico / Nuevo Leon      | Human | Female | 45 | Released     | Oropharyngeal swab |
| hCoV-19/Mexico/NLE-InDRE_F11940_S1224/2021:EPI_ISL_1651237   | 15/03/21 | North America / Mexico / Nuevo Leon      | Human | Male   | 75 | Released     | Oropharyngeal swab |
| hCoV-19/Mexico/NLE-InDRE_F11941_S1225/2021:EPI_ISL_1651238   | 16/03/21 | North America / Mexico / Nuevo Leon      | Human | Male   | 44 | Released     | Oropharyngeal swab |
| hCoV-19/Mexico/NLE-InDRE_F11942_S1226/2021:EPI_ISL_1651239   | 16/03/21 | North America / Mexico / Nuevo Leon      | Human | Female | 34 | Released     | Oropharyngeal swab |
| hCoV-19/Mexico/NLE-InDRE_F11943_S1227/2021:EPI_ISL_1651240   | 16/03/21 | North America / Mexico / Nuevo Leon      | Human | Male   | 34 | Released     | Oropharyngeal swab |
| hCoV-19/Mexico/NLE-InDRE_F11944_S1228/2021:EPI_ISL_1651241   | 15/03/21 | North America / Mexico / Nuevo Leon      | Human | Male   | 20 | Released     | Oropharyngeal swab |
| hCoV-19/Mexico/NLE-InDRE_F11948_S1229/2021:EPI_ISL_1651242   | 16/03/21 | North America / Mexico / Nuevo Leon      | Human | Female | 28 | Released     | Oropharyngeal swab |
| hCoV-19/Mexico/NLE-InDRE_F11949_S1230/2021:EPI_ISL_1651243   | 16/03/21 | North America / Mexico / Nuevo Leon      | Human | Female | 50 | Released     | Oropharyngeal swab |
| hCoV-19/Mexico/NLE-InDRE_F11950_S1231/2021:EPI_ISL_1651244   | 16/03/21 | North America / Mexico / Nuevo Leon      | Human | Male   | 50 | Released     | Oropharyngeal swab |
| hCoV-19/Mexico/NLE-InDRE_F11951_S1232/2021:EPI_ISL_1651245   | 16/03/21 | North America / Mexico / Nuevo Leon      | Human | Female | 45 | Released     | Oropharyngeal swab |
| hCoV-19/Mexico/NLE-InDRE_F11952_S1233/2021:EPI_ISL_1651246   | 16/03/21 | North America / Mexico / Nuevo Leon      | Human | Male   | 64 | Released     | Oropharyngeal swab |
| hCoV-19/Mexico/NLE-InDRE_F11953_S1234/2021:EPI_ISL_1651247   | 16/03/21 | North America / Mexico / Nuevo Leon      | Human | Male   | 31 | Released     | Oropharyngeal swab |
| hCoV-19/Mexico/NLE-InDRE_F11955_S1235/2021:EPI_ISL_1651248   | 16/03/21 | North America / Mexico / Nuevo Leon      | Human | Female | 23 | Released     | Oropharyngeal swab |
| hCoV-19/Mexico/NLE-InDRE_F11956_S1236/2021:EPI_ISL_1651249   | 17/03/21 | North America / Mexico / Nuevo Leon      | Human | Male   | 55 | Released     | Oropharyngeal swab |
| hCoV-19/Mexico/JAL-InDRE_F11988_S1237/2021:EPI_ISL_1651250   | 18/03/21 | North America / Mexico / Jalisco         | Human | Female | 72 | Hospitalized | Oropharyngeal swab |
| hCoV-19/Mexico/JAL-InDRE_F11991_S1238/2021:EPI_ISL_1651251   | 20/03/21 | North America / Mexico / Jalisco         | Human | Male   | 60 | Released     | Oropharyngeal swab |
| hCoV-19/Mexico/OAX-InDRE_F11998_S1239/2021:EPI_ISL_1651252   | 16/03/21 | North America / Mexico / Oaxaca          | Human | Male   | 19 | Released     | Oropharyngeal swab |
| hCoV-19/Mexico/SIN-InDRE_F12014_S1240/2021:EPI_ISL_1651253   | 14/03/21 | North America / Mexico / Sinaloa         | Human | Male   | 66 | Hospitalized | Oropharyngeal swab |
| hCoV-19/Mexico/SON-InDRE_F12033_S1241/2021:EPI_ISL_1651254   | 17/03/21 | North America / Mexico / Sonora          | Human | Male   | 41 | Released     | Oropharyngeal swab |
| hCoV-19/Mexico/MOR-InDRE_F12082_S1242/2021:EPI_ISL_1651255   | 14/03/21 | North America / Mexico / Morelos         | Human | Male   | 77 | Hospitalized | Oropharyngeal swab |
| hCoV-19/Mexico/MOR-InDRE_F12086_S1243/2021:EPI_ISL_1651256   | 15/03/21 | North America / Mexico / Morelos         | Human | Female | 61 | Hospitalized | Oropharyngeal swab |

|                                                           |          |                                      |       |        |    |              |                    |
|-----------------------------------------------------------|----------|--------------------------------------|-------|--------|----|--------------|--------------------|
| hCoV-19/Mexico/MOR-InDRE_F12088_S1244/2021EPI_ISL_1651257 | 15/03/21 | North America / Mexico / Morelos     | Human | Female | 56 | Released     | Oropharyngeal swab |
| hCoV-19/Mexico/MOR-InDRE_F12091_S1245/2021EPI_ISL_1651258 | 16/03/21 | North America / Mexico / Morelos     | Human | Female | 57 | Hospitalized | Oropharyngeal swab |
| hCoV-19/Mexico/MOR-InDRE_F12093_S1246/2021EPI_ISL_1651259 | 17/03/21 | North America / Mexico / Morelos     | Human | Female | 45 | Released     | Oropharyngeal swab |
| hCoV-19/Mexico/MOR-InDRE_F12094_S1247/2021EPI_ISL_1651260 | 15/03/21 | North America / Mexico / Morelos     | Human | Female | 59 | Hospitalized | Oropharyngeal swab |
| hCoV-19/Mexico/MOR-InDRE_F12095_S1248/2021EPI_ISL_1651261 | 17/03/21 | North America / Mexico / Morelos     | Human | Male   | 50 | Hospitalized | Oropharyngeal swab |
| hCoV-19/Mexico/MOR-InDRE_F12099_S1249/2021EPI_ISL_1651262 | 18/03/21 | North America / Mexico / Morelos     | Human | Male   | 50 | Released     | Oropharyngeal swab |
| hCoV-19/Mexico/MOR-InDRE_F12100_S1250/2021EPI_ISL_1651263 | 18/03/21 | North America / Mexico / Morelos     | Human | Male   | 49 | Released     | Oropharyngeal swab |
| hCoV-19/Mexico/MOR-InDRE_F12101_S1251/2021EPI_ISL_1651264 | 18/03/21 | North America / Mexico / Morelos     | Human | Female | 77 | Released     | Oropharyngeal swab |
| hCoV-19/Mexico/MOR-InDRE_F12103_S1252/2021EPI_ISL_1651265 | 19/03/21 | North America / Mexico / Morelos     | Human | Male   | 44 | Released     | Oropharyngeal swab |
| hCoV-19/Mexico/MOR-InDRE_F12104_S1253/2021EPI_ISL_1651266 | 19/03/21 | North America / Mexico / Morelos     | Human | Male   | 46 | Released     | Oropharyngeal swab |
| hCoV-19/Mexico/MOR-InDRE_F12105_S1254/2021EPI_ISL_1651267 | 19/03/21 | North America / Mexico / Morelos     | Human | Male   | 68 | Released     | Oropharyngeal swab |
| hCoV-19/Mexico/MOR-InDRE_F12106_S1255/2021EPI_ISL_1651268 | 19/03/21 | North America / Mexico / Morelos     | Human | Female | 30 | Released     | Oropharyngeal swab |
| hCoV-19/Mexico/MOR-InDRE_F12107_S1256/2021EPI_ISL_1651269 | 19/03/21 | North America / Mexico / Morelos     | Human | Male   | 92 | Released     | Oropharyngeal swab |
| hCoV-19/Mexico/MOR-InDRE_F12108_S1257/2021EPI_ISL_1651270 | 18/03/21 | North America / Mexico / Morelos     | Human | Male   | 68 | Hospitalized | Oropharyngeal swab |
| hCoV-19/Mexico/MOR-InDRE_F12109_S1258/2021EPI_ISL_1651271 | 18/03/21 | North America / Mexico / Morelos     | Human | Male   | 70 | Hospitalized | Oropharyngeal swab |
| hCoV-19/Mexico/MOR-InDRE_F12110_S1259/2021EPI_ISL_1651272 | 19/03/21 | North America / Mexico / Morelos     | Human | Male   | 68 | Hospitalized | Oropharyngeal swab |
| hCoV-19/Mexico/MOR-InDRE_F12113_S1260/2021EPI_ISL_1651273 | 22/03/21 | North America / Mexico / Morelos     | Human | Female | 49 | Hospitalized | Oropharyngeal swab |
| hCoV-19/Mexico/MOR-InDRE_F12114_S1261/2021EPI_ISL_1651274 | 22/03/21 | North America / Mexico / Morelos     | Human | Male   | 40 | Released     | Oropharyngeal swab |
| hCoV-19/Mexico/MOR-InDRE_F12115_S1262/2021EPI_ISL_1651275 | 21/03/21 | North America / Mexico / Morelos     | Human | Female | 58 | Hospitalized | Oropharyngeal swab |
| hCoV-19/Mexico/MOR-InDRE_F12117_S1263/2021EPI_ISL_1651276 | 19/03/21 | North America / Mexico / Morelos     | Human | Male   | 43 | Released     | Oropharyngeal swab |
| hCoV-19/Mexico/QUE-InDRE_F12126_S1264/2021EPI_ISL_1651277 | 17/03/21 | North America / Mexico / Queretaro   | Human | Male   | 62 | Released     | Oropharyngeal swab |
| hCoV-19/Mexico/QUE-InDRE_F12127_S1265/2021EPI_ISL_1651278 | 17/03/21 | North America / Mexico / Queretaro   | Human | Female | 57 | Released     | Oropharyngeal swab |
| hCoV-19/Mexico/QUE-InDRE_F12128_S1266/2021EPI_ISL_1651279 | 19/03/21 | North America / Mexico / Queretaro   | Human | Male   | 35 | Released     | Oropharyngeal swab |
| hCoV-19/Mexico/QUE-InDRE_F12130_S1267/2021EPI_ISL_1651280 | 19/03/21 | North America / Mexico / Queretaro   | Human | Male   | 96 | Hospitalized | Oropharyngeal swab |
| hCoV-19/Mexico/QUE-InDRE_F12133_S1268/2021EPI_ISL_1651281 | 20/03/21 | North America / Mexico / Queretaro   | Human | Female | 34 | Released     | Oropharyngeal swab |
| hCoV-19/Mexico/QUE-InDRE_F12134_S1269/2021EPI_ISL_1651282 | 20/03/21 | North America / Mexico / Queretaro   | Human | Male   | 66 | Released     | Oropharyngeal swab |
| hCoV-19/Mexico/QUE-InDRE_F12137_S1270/2021EPI_ISL_1651283 | 20/03/21 | North America / Mexico / Queretaro   | Human | Female | 47 | Deceased     | Oropharyngeal swab |
| hCoV-19/Mexico/QUE-InDRE_F12138_S1271/2021EPI_ISL_1651284 | 21/03/21 | North America / Mexico / Queretaro   | Human | Male   | 43 | Released     | Oropharyngeal swab |
| hCoV-19/Mexico/QUE-InDRE_F12140_S1272/2021EPI_ISL_1651285 | 21/03/21 | North America / Mexico / Queretaro   | Human | Male   | 28 | Released     | Oropharyngeal swab |
| hCoV-19/Mexico/QUE-InDRE_F12143_S1273/2021EPI_ISL_1651286 | 21/03/21 | North America / Mexico / Queretaro   | Human | Female | 87 | Hospitalized | Oropharyngeal swab |
| hCoV-19/Mexico/QUE-InDRE_F12147_S1274/2021EPI_ISL_1651287 | 22/03/21 | North America / Mexico / Queretaro   | Human | Female | 81 | Deceased     | Oropharyngeal swab |
| hCoV-19/Mexico/QUE-InDRE_F12148_S1275/2021EPI_ISL_1651876 | 22/03/21 | North America / Mexico / Queretaro   | Human | Male   | 67 | Hospitalized | Oropharyngeal swab |
| hCoV-19/Mexico/CHH-InDRE_F12153_S1276/2021EPI_ISL_1651877 | 15/03/21 | North America / Mexico / Chihuahua   | Human | Female | 61 | Live         | Oropharyngeal swab |
| hCoV-19/Mexico/CHH-InDRE_F12154_S1277/2021EPI_ISL_1651878 | 15/03/21 | North America / Mexico / Chihuahua   | Human | Female | 84 | Hospitalized | Oropharyngeal swab |
| hCoV-19/Mexico/CHH-InDRE_F12163_S1278/2021EPI_ISL_1651879 | 17/03/21 | North America / Mexico / Chihuahua   | Human | Female | 41 | Released     | Oropharyngeal swab |
| hCoV-19/Mexico/CHH-InDRE_F12164_S1279/2021EPI_ISL_1651880 | 17/03/21 | North America / Mexico / Chihuahua   | Human | Female | 38 | Released     | Oropharyngeal swab |
| hCoV-19/Mexico/VER-InDRE_F12186_S1280/2021EPI_ISL_1651881 | 17/03/21 | North America / Mexico / Veracruz    | Human | Female | 54 | Released     | Oropharyngeal swab |
| hCoV-19/Mexico/VER-InDRE_F12187_S1281/2021EPI_ISL_1651882 | 16/03/21 | North America / Mexico / Veracruz    | Human | Male   | 33 | Live         | Oropharyngeal swab |
| hCoV-19/Mexico/YUC-InDRE_F12189_S1282/2021EPI_ISL_1651883 | 22/03/21 | North America / Mexico / Yucatan     | Human | Female | 45 | Released     | Oropharyngeal swab |
| hCoV-19/Mexico/YUC-InDRE_F12191_S1283/2021EPI_ISL_1651884 | 22/03/21 | North America / Mexico / Yucatan     | Human | Male   | 39 | Released     | Oropharyngeal swab |
| hCoV-19/Mexico/YUC-InDRE_F12192_S1284/2021EPI_ISL_1651885 | 22/03/21 | North America / Mexico / Yucatan     | Human | Female | 30 | Released     | Oropharyngeal swab |
| hCoV-19/Mexico/YUC-InDRE_F12195_S1285/2021EPI_ISL_1651886 | 22/03/21 | North America / Mexico / Yucatan     | Human | Female | 84 | Hospitalized | Oropharyngeal swab |
| hCoV-19/Mexico/TAM-InDRE_F12200_S1286/2021EPI_ISL_1651887 | 16/03/21 | North America / Mexico / Tamaulipas  | Human | Male   | 75 | Hospitalized | Oropharyngeal swab |
| hCoV-19/Mexico/CMX-InDRE_F12208_S1287/2021EPI_ISL_1651888 | 16/03/21 | North America / Mexico / Mexico City | Human | Male   | 72 | Hospitalized | Oropharyngeal swab |



|                                            |                 |          |                                              |       |        |    |              |                    |
|--------------------------------------------|-----------------|----------|----------------------------------------------|-------|--------|----|--------------|--------------------|
| hCoV-19/Mexico/BCS-InDRE_F12235_S1289/2021 | EPI_ISL_1651890 | 20/03/21 | North America / Mexico / Baja California Sur | Human | Female | 43 | Released     | Oropharyngeal swab |
| hCoV-19/Mexico/BCS-InDRE_F12236_S1290/2021 | EPI_ISL_1651891 | 20/03/21 | North America / Mexico / Baja California Sur | Human | Male   | 43 | Released     | Oropharyngeal swab |
| hCoV-19/Mexico/BCS-InDRE_F12240_S1292/2021 | EPI_ISL_1651893 | 20/03/21 | North America / Mexico / Baja California Sur | Human | Male   | 16 | Released     | Oropharyngeal swab |
| hCoV-19/Mexico/BCS-InDRE_F12243_S1294/2021 | EPI_ISL_1651895 | 21/03/21 | North America / Mexico / Baja California Sur | Human | Female | 77 | Released     | Oropharyngeal swab |
| hCoV-19/Mexico/ROO-InDRE_F12254_S1295/2021 | EPI_ISL_1651896 | 18/03/21 | North America / Mexico / Quintana Roo        | Human | Male   | 47 | Released     | Oropharyngeal swab |
| hCoV-19/Mexico/ROO-InDRE_F12255_S1296/2021 | EPI_ISL_1651897 | 20/03/21 | North America / Mexico / Quintana Roo        | Human | Male   | 28 | Released     | Oropharyngeal swab |
| hCoV-19/Mexico/ROO-InDRE_F12256_S1297/2021 | EPI_ISL_1651898 | 20/03/21 | North America / Mexico / Quintana Roo        | Human | Female | 62 | Released     | Oropharyngeal swab |
| hCoV-19/Mexico/CMX-InDRE_F12277_S1298/2021 | EPI_ISL_1651899 | 17/03/21 | North America / Mexico / Mexico City         | Human | Female | 71 | Released     | Oropharyngeal swab |
| hCoV-19/Mexico/BCS-InDRE_F12278_S1299/2021 | EPI_ISL_1651900 | 18/03/21 | North America / Mexico / Baja California Sur | Human | Female | 72 | Released     | Oropharyngeal swab |
| hCoV-19/Mexico/CMX-InDRE_F12282_S1300/2021 | EPI_ISL_1651901 | 19/03/21 | North America / Mexico / Mexico City         | Human | Female | 64 | Released     | Oropharyngeal swab |
| hCoV-19/Mexico/CMX-InDRE_F12283_S1301/2021 | EPI_ISL_1651902 | 16/03/21 | North America / Mexico / Mexico City         | Human | Male   | 54 | Released     | Oropharyngeal swab |
| hCoV-19/Mexico/MEX-InDRE_F12284_S1302/2021 | EPI_ISL_1651903 | 17/03/21 | North America / Mexico / State of Mexico     | Human | Female | 87 | Released     | Oropharyngeal swab |
| hCoV-19/Mexico/MOR-InDRE_F12299_S1303/2021 | EPI_ISL_1651904 | 19/03/21 | North America / Mexico / Morelos             | Human | Male   | 90 | Hospitalized | Oropharyngeal swab |
| hCoV-19/Mexico/MOR-InDRE_F12306_S1304/2021 | EPI_ISL_1651905 | 23/03/21 | North America / Mexico / Morelos             | Human | Female | 55 | Released     | Oropharyngeal swab |
| hCoV-19/Mexico/MOR-InDRE_F12307_S1305/2021 | EPI_ISL_1651906 | 23/03/21 | North America / Mexico / Morelos             | Human | Female | 55 | Released     | Oropharyngeal swab |
| hCoV-19/Mexico/MOR-InDRE_F12310_S1306/2021 | EPI_ISL_1651907 | 23/03/21 | North America / Mexico / Morelos             | Human | Male   | 81 | Hospitalized | Oropharyngeal swab |
| hCoV-19/Mexico/MOR-InDRE_F12311_S1307/2021 | EPI_ISL_1651908 | 22/03/21 | North America / Mexico / Morelos             | Human | Male   | 44 | Hospitalized | Oropharyngeal swab |
| hCoV-19/Mexico/SIN_CIAD_ID1988/2021        | EPI_ISL_1660619 | 19/03/21 | North America / Mexico / Sinaloa             | Human | Male   | 59 | unknown      | Oropharyngeal swab |
| hCoV-19/Mexico/SIN_CIAD_HJ1345/2021        | EPI_ISL_1660622 | 26/03/21 | North America / Mexico / Sinaloa             | Human | Male   | 70 | unknown      | Oropharyngeal swab |
| hCoV-19/Mexico/SIN_CIAD_S6400/2021         | EPI_ISL_1660623 | 26/03/21 | North America / Mexico / Sinaloa             | Human | Female | 38 | unknown      | Oropharyngeal swab |
| hCoV-19/Mexico/SIN_CIAD_HJ1356/2021        | EPI_ISL_1660624 | 29/03/21 | North America / Mexico / Sinaloa             | Human | Female | 66 | unknown      | Oropharyngeal swab |
| hCoV-19/Mexico/SIN_CIAD_S6410/2021         | EPI_ISL_1660626 | 27/03/21 | North America / Mexico / Sinaloa             | Human | Male   | 63 | unknown      | Oropharyngeal swab |
| hCoV-19/Mexico/SIN_CIAD_ID2083/2021        | EPI_ISL_1660627 | 30/03/21 | North America / Mexico / Sinaloa             | Human | Male   | 23 | unknown      | Oropharyngeal swab |
| hCoV-19/Mexico/CMX-INMEGEN-03-09-26/2021   | EPI_ISL_1661254 | 17/03/21 | North America / Mexico / Mexico City         | Human | Male   | 39 | unknown      | Oropharyngeal swab |
| hCoV-19/Mexico/MOR-InDRE_F12323_S1308/2021 | EPI_ISL_1661474 | 25/03/21 | North America / Mexico / Morelos             | Human | Female | 68 | Released     | Oropharyngeal swab |
| hCoV-19/Mexico/MOR-InDRE_F12318_S1309/2021 | EPI_ISL_1661475 | 24/03/21 | North America / Mexico / Morelos             | Human | Female | 61 | Released     | Oropharyngeal swab |
| hCoV-19/Mexico/MOR-InDRE_F12320_S1310/2021 | EPI_ISL_1661476 | 24/03/21 | North America / Mexico / Morelos             | Human | Male   | 67 | Hospitalized | Oropharyngeal swab |
| hCoV-19/Mexico/MOR-InDRE_F12312_S1311/2021 | EPI_ISL_1661477 | 22/03/21 | North America / Mexico / Morelos             | Human | Female | 64 | Hospitalized | Oropharyngeal swab |
| hCoV-19/Mexico/PUE-InDRE_F12325_S1312/2021 | EPI_ISL_1661478 | 26/03/21 | North America / Mexico / Puebla              | Human | Male   | 56 | Hospitalized | Oropharyngeal swab |
| hCoV-19/Mexico/MOR-InDRE_F12326_S1313/2021 | EPI_ISL_1661479 | 25/03/21 | North America / Mexico / Morelos             | Human | Female | 72 | Hospitalized | Oropharyngeal swab |
| hCoV-19/Mexico/MOR-InDRE_F12327_S1314/2021 | EPI_ISL_1661480 | 25/03/21 | North America / Mexico / Morelos             | Human | Male   | 57 | Hospitalized | Oropharyngeal swab |
| hCoV-19/Mexico/CHH-InDRE_F12357_S1315/2021 | EPI_ISL_1661481 | 22/03/21 | North America / Mexico / Chihuahua           | Human | Female | 36 | Live         | Oropharyngeal swab |
| hCoV-19/Mexico/CHH-InDRE_F12360_S1316/2021 | EPI_ISL_1661482 | 22/03/21 | North America / Mexico / Chihuahua           | Human | Male   | 76 | Hospitalized | Oropharyngeal swab |
| hCoV-19/Mexico/CHH-InDRE_F12362_S1317/2021 | EPI_ISL_1661483 | 22/03/21 | North America / Mexico / Chihuahua           | Human | Female | 25 | Released     | Oropharyngeal swab |
| hCoV-19/Mexico/CHH-InDRE_F12363_S1318/2021 | EPI_ISL_1661484 | 22/03/21 | North America / Mexico / Chihuahua           | Human | Male   | 18 | Released     | Oropharyngeal swab |
| hCoV-19/Mexico/CHH-InDRE_F12364_S1319/2021 | EPI_ISL_1661485 | 22/03/21 | North America / Mexico / Chihuahua           | Human | Female | 40 | Released     | Oropharyngeal swab |
| hCoV-19/Mexico/CHH-InDRE_F12365_S1320/2021 | EPI_ISL_1661486 | 23/03/21 | North America / Mexico / Chihuahua           | Human | Male   | 52 | Released     | Oropharyngeal swab |
| hCoV-19/Mexico/CHH-InDRE_F12368_S1321/2021 | EPI_ISL_1661487 | 18/03/21 | North America / Mexico / Chihuahua           | Human | Female | 32 | Hospitalized | Oropharyngeal swab |
| hCoV-19/Mexico/CHH-InDRE_F12369_S1322/2021 | EPI_ISL_1661488 | 18/03/21 | North America / Mexico / Chihuahua           | Human | Female | 67 | Hospitalized | Oropharyngeal swab |
| hCoV-19/Mexico/CHH-InDRE_F12370_S1323/2021 | EPI_ISL_1661489 | 19/03/21 | North America / Mexico / Chihuahua           | Human | Female | 74 | Deceased     | Oropharyngeal swab |
| hCoV-19/Mexico/CMX-InDRE_F12375_S1324/2021 | EPI_ISL_1661490 | 16/03/21 | North America / Mexico / Mexico City         | Human | Female | 65 | Hospitalized | Oropharyngeal swab |
| hCoV-19/Mexico/MEX-InDRE_F12379_S1325/2021 | EPI_ISL_1661491 | 18/03/21 | North America / Mexico / State of Mexico     | Human | Female | 85 | Hospitalized | Oropharyngeal swab |
| hCoV-19/Mexico/MEX-InDRE_F12380_S1326/2021 | EPI_ISL_1661492 | 17/03/21 | North America / Mexico / State of Mexico     | Human | Female | 59 | Hospitalized | Oropharyngeal swab |
| hCoV-19/Mexico/CMX-InDRE_F12383_S1327/2021 | EPI_ISL_1661493 | 17/03/21 | North America / Mexico / Mexico City         | Human | Male   | 86 | Hospitalized | Oropharyngeal swab |

|                                                           |          |                                          |       |        |    |              |                    |
|-----------------------------------------------------------|----------|------------------------------------------|-------|--------|----|--------------|--------------------|
| hCoV-19/Mexico/CMX-InDRE_F12384_S1328/2021EPI_ISL_1661494 | 17/03/21 | North America / Mexico / Mexico City     | Human | Male   | 46 | Deceased     | Oropharyngeal swab |
| hCoV-19/Mexico/GUA-InDRE_F12422_S1329/2021EPI_ISL_1661495 | 20/03/21 | North America / Mexico / Guanajuato      | Human | Female | 63 | Deceased     | Oropharyngeal swab |
| hCoV-19/Mexico/GUA-InDRE_F12425_S1330/2021EPI_ISL_1661496 | 15/03/21 | North America / Mexico / Guanajuato      | Human | Male   | 39 | Live         | Oropharyngeal swab |
| hCoV-19/Mexico/GUA-InDRE_F12428_S1331/2021EPI_ISL_1661497 | 16/03/21 | North America / Mexico / Guanajuato      | Human | Female | 24 | Live         | Oropharyngeal swab |
| hCoV-19/Mexico/GUA-InDRE_F12430_S1332/2021EPI_ISL_1661498 | 16/03/21 | North America / Mexico / Guanajuato      | Human | Male   | 83 | Released     | Oropharyngeal swab |
| hCoV-19/Mexico/GUA-InDRE_F12432_S1333/2021EPI_ISL_1661499 | 24/03/21 | North America / Mexico / Guanajuato      | Human | Male   | 82 | Released     | Oropharyngeal swab |
| hCoV-19/Mexico/GUA-InDRE_F12435_S1334/2021EPI_ISL_1661500 | 23/03/21 | North America / Mexico / Guanajuato      | Human | Male   | 65 | Hospitalized | Oropharyngeal swab |
| hCoV-19/Mexico/GUA-InDRE_F12438_S1335/2021EPI_ISL_1661501 | 16/03/21 | North America / Mexico / Guanajuato      | Human | Male   | 46 | Live         | Oropharyngeal swab |
| hCoV-19/Mexico/GUA-InDRE_F12440_S1336/2021EPI_ISL_1661502 | 16/03/21 | North America / Mexico / Guanajuato      | Human | Female | 77 | Released     | Oropharyngeal swab |
| hCoV-19/Mexico/GUA-InDRE_F12443_S1337/2021EPI_ISL_1661503 | 16/03/21 | North America / Mexico / Guanajuato      | Human | Male   | 31 | Released     | Oropharyngeal swab |
| hCoV-19/Mexico/GUA-InDRE_F12455_S1338/2021EPI_ISL_1661504 | 20/03/21 | North America / Mexico / Guanajuato      | Human | Female | 77 | Released     | Oropharyngeal swab |
| hCoV-19/Mexico/GUA-InDRE_F12456_S1339/2021EPI_ISL_1661505 | 19/03/21 | North America / Mexico / Guanajuato      | Human | Female | 46 | Released     | Oropharyngeal swab |
| hCoV-19/Mexico/GUA-InDRE_F12457_S1340/2021EPI_ISL_1661506 | 23/03/21 | North America / Mexico / Guanajuato      | Human | Female | 49 | Released     | Oropharyngeal swab |
| hCoV-19/Mexico/GUA-InDRE_F12459_S1341/2021EPI_ISL_1661507 | 23/03/21 | North America / Mexico / Guanajuato      | Human | Female | 34 | Live         | Oropharyngeal swab |
| hCoV-19/Mexico/GUA-InDRE_F12460_S1342/2021EPI_ISL_1661508 | 22/03/21 | North America / Mexico / Guanajuato      | Human | Female | 21 | Released     | Oropharyngeal swab |
| hCoV-19/Mexico/GUA-InDRE_F12461_S1343/2021EPI_ISL_1661509 | 22/03/21 | North America / Mexico / Guanajuato      | Human | Female | 21 | Released     | Oropharyngeal swab |
| hCoV-19/Mexico/GUA-InDRE_F12462_S1344/2021EPI_ISL_1661510 | 24/03/21 | North America / Mexico / Guanajuato      | Human | Female | 46 | Released     | Oropharyngeal swab |
| hCoV-19/Mexico/GUA-InDRE_F12467_S1345/2021EPI_ISL_1661511 | 25/03/21 | North America / Mexico / Guanajuato      | Human | Female | 39 | Released     | Oropharyngeal swab |
| hCoV-19/Mexico/GUA-InDRE_F12468_S1346/2021EPI_ISL_1661512 | 24/03/21 | North America / Mexico / Guanajuato      | Human | Female | 53 | Released     | Oropharyngeal swab |
| hCoV-19/Mexico/GUA-InDRE_F12469_S1347/2021EPI_ISL_1661513 | 24/03/21 | North America / Mexico / Guanajuato      | Human | Female | 24 | Released     | Oropharyngeal swab |
| hCoV-19/Mexico/GUA-InDRE_F12470_S1348/2021EPI_ISL_1661514 | 25/03/21 | North America / Mexico / Guanajuato      | Human | Female | 27 | Released     | Oropharyngeal swab |
| hCoV-19/Mexico/GUA-InDRE_F12471_S1349/2021EPI_ISL_1661515 | 25/03/21 | North America / Mexico / Guanajuato      | Human | Male   | 23 | Released     | Oropharyngeal swab |
| hCoV-19/Mexico/GUA-InDRE_F12472_S1350/2021EPI_ISL_1661516 | 25/03/21 | North America / Mexico / Guanajuato      | Human | Female | 56 | Released     | Oropharyngeal swab |
| hCoV-19/Mexico/GUA-InDRE_F12473_S1351/2021EPI_ISL_1661517 | 26/03/21 | North America / Mexico / Guanajuato      | Human | Female | 43 | Released     | Oropharyngeal swab |
| hCoV-19/Mexico/GUA-InDRE_F12476_S1352/2021EPI_ISL_1661518 | 25/03/21 | North America / Mexico / Guanajuato      | Human | Female | 51 | Released     | Oropharyngeal swab |
| hCoV-19/Mexico/GUA-InDRE_F12477_S1353/2021EPI_ISL_1661519 | 25/03/21 | North America / Mexico / Guanajuato      | Human | Male   | 56 | Released     | Oropharyngeal swab |
| hCoV-19/Mexico/GUA-InDRE_F12479_S1354/2021EPI_ISL_1661520 | 26/03/21 | North America / Mexico / Guanajuato      | Human | Female | 36 | Released     | Oropharyngeal swab |
| hCoV-19/Mexico/MEX-InDRE_F12481_S1355/2021EPI_ISL_1661521 | 27/03/21 | North America / Mexico / State of Mexico | Human | Male   | 65 | Hospitalized | Oropharyngeal swab |
| hCoV-19/Mexico/QUE-InDRE_F12484_S1356/2021EPI_ISL_1661522 | 28/03/21 | North America / Mexico / Queretaro       | Human | Female | 27 | Released     | Oropharyngeal swab |
| hCoV-19/Mexico/QUE-InDRE_F12485_S1357/2021EPI_ISL_1661523 | 27/03/21 | North America / Mexico / Queretaro       | Human | Female | 42 | Released     | Oropharyngeal swab |
| hCoV-19/Mexico/QUE-InDRE_F12486_S1358/2021EPI_ISL_1661524 | 27/03/21 | North America / Mexico / Queretaro       | Human | Male   | 23 | Hospitalized | Oropharyngeal swab |
| hCoV-19/Mexico/QUE-InDRE_F12487_S1359/2021EPI_ISL_1661525 | 27/03/21 | North America / Mexico / Queretaro       | Human | Male   | 23 | Released     | Oropharyngeal swab |
| hCoV-19/Mexico/QUE-InDRE_F12488_S1360/2021EPI_ISL_1661526 | 26/03/21 | North America / Mexico / Queretaro       | Human | Female | 25 | Released     | Oropharyngeal swab |
| hCoV-19/Mexico/QUE-InDRE_F12489_S1361/2021EPI_ISL_1661527 | 27/03/21 | North America / Mexico / Queretaro       | Human | Male   | 57 | Released     | Oropharyngeal swab |
| hCoV-19/Mexico/QUE-InDRE_F12492_S1362/2021EPI_ISL_1661528 | 26/03/21 | North America / Mexico / Queretaro       | Human | Male   | 40 | Released     | Oropharyngeal swab |
| hCoV-19/Mexico/QUE-InDRE_F12493_S1363/2021EPI_ISL_1661529 | 26/03/21 | North America / Mexico / Queretaro       | Human | Male   | 59 | Released     | Oropharyngeal swab |
| hCoV-19/Mexico/QUE-InDRE_F12494_S1364/2021EPI_ISL_1661530 | 26/03/21 | North America / Mexico / Queretaro       | Human | Male   | 36 | Released     | Oropharyngeal swab |
| hCoV-19/Mexico/QUE-InDRE_F12495_S1365/2021EPI_ISL_1661531 | 25/03/21 | North America / Mexico / Queretaro       | Human | Male   | 80 | Hospitalized | Oropharyngeal swab |
| hCoV-19/Mexico/QUE-InDRE_F12496_S1366/2021EPI_ISL_1661532 | 25/03/21 | North America / Mexico / Queretaro       | Human | Female | 86 | Hospitalized | Oropharyngeal swab |
| hCoV-19/Mexico/QUE-InDRE_F12497_S1367/2021EPI_ISL_1661533 | 25/03/21 | North America / Mexico / Queretaro       | Human | Male   | 47 | Released     | Oropharyngeal swab |
| hCoV-19/Mexico/HID-InDRE_F12498_S1368/2021EPI_ISL_1661534 | 25/03/21 | North America / Mexico / Hidalgo         | Human | Female | 76 | Hospitalized | Oropharyngeal swab |
| hCoV-19/Mexico/PUE-InDRE_F12504_S1369/2021EPI_ISL_1661535 | 24/03/21 | North America / Mexico / Puebla          | Human | Female | 50 | Released     | Oropharyngeal swab |
| hCoV-19/Mexico/ZAC-InDRE_F12509_S1370/2021EPI_ISL_1661536 | 27/03/21 | North America / Mexico / Zacatecas       | Human | Male   | 18 | Released     | Oropharyngeal swab |
| hCoV-19/Mexico/ZAC-InDRE_F12510_S1371/2021EPI_ISL_1661537 | 27/03/21 | North America / Mexico / Zacatecas       | Human | Female | 39 | Released     | Oropharyngeal swab |

|                                                            |          |                                              |       |        |    |              |                     |
|------------------------------------------------------------|----------|----------------------------------------------|-------|--------|----|--------------|---------------------|
| hCoV-19/Mexico/ZAC-InDRE_F12519_S1372/2021 EPI_ISL_1661538 | 26/03/21 | North America / Mexico / Zacatecas           | Human | Female | 51 | Released     | Oropharyngeal swab  |
| hCoV-19/Mexico/HID-InDRE_F12521_S1373/2021 EPI_ISL_1661539 | 23/03/21 | North America / Mexico / Hidalgo             | Human | Male   | 39 | Hospitalized | Oropharyngeal swab  |
| hCoV-19/Mexico/HID-InDRE_F12522_S1374/2021 EPI_ISL_1661540 | 23/03/21 | North America / Mexico / Hidalgo             | Human | Male   | 23 | Live         | Oropharyngeal swab  |
| hCoV-19/Mexico/HID-InDRE_F12523_S1375/2021 EPI_ISL_1661541 | 26/03/21 | North America / Mexico / Hidalgo             | Human | Female | 89 | Released     | Oropharyngeal swab  |
| hCoV-19/Mexico/MOR-InDRE_F12328_S1376/2021 EPI_ISL_1661542 | 26/03/21 | North America / Mexico / Morelos             | Human | Male   | 77 | Released     | Oropharyngeal swab  |
| hCoV-19/Mexico/MOR-InDRE_F12329_S1377/2021 EPI_ISL_1661543 | 26/03/21 | North America / Mexico / Morelos             | Human | Male   | 73 | Released     | Oropharyngeal swab  |
| hCoV-19/Mexico/ZAC-InDRE_F12512_S1378/2021 EPI_ISL_1661544 | 27/03/21 | North America / Mexico / Zacatecas           | Human | Female | 27 | Released     | Oropharyngeal swab  |
| hCoV-19/Mexico/ZAC-InDRE_F12514_S1379/2021 EPI_ISL_1661545 | 27/03/21 | North America / Mexico / Zacatecas           | Human | Female | 35 | Released     | Oropharyngeal swab  |
| hCoV-19/Mexico/ZAC-InDRE_F12515_S1380/2021 EPI_ISL_1661546 | 27/03/21 | North America / Mexico / Zacatecas           | Human | Female | 51 | Released     | Oropharyngeal swab  |
| hCoV-19/Mexico/ZAC-InDRE_F12516_S1381/2021 EPI_ISL_1661547 | 27/03/21 | North America / Mexico / Zacatecas           | Human | Female | 27 | Released     | Oropharyngeal swab  |
| hCoV-19/Mexico/MIC-InDRE_F11838_S1382/2021 EPI_ISL_1661548 | 16/03/21 | North America / Mexico / Michoacan           | Human | Female | 62 | Released     | Oropharyngeal swab  |
| hCoV-19/Mexico/CMX-InDRE_F12418_S1383/2021 EPI_ISL_1661549 | 18/03/21 | North America / Mexico / Mexico City         | Human | Female | 51 | unknown      | Oropharyngeal swab  |
| hCoV-19/Mexico/HID-InDRE_F12665_S1386/2021 EPI_ISL_1661551 | 01/04/21 | North America / Mexico / Hidalgo             | Human | Male   | 54 | Released     | Oropharyngeal swab  |
| hCoV-19/Mexico/HID-InDRE_F12666_S1387/2021 EPI_ISL_1661552 | 03/04/21 | North America / Mexico / Hidalgo             | Human | Female | 52 | Hospitalized | Oropharyngeal swab  |
| hCoV-19/Mexico/NLE-InDRE_F12688_S1388/2021 EPI_ISL_1661553 | 31/03/21 | North America / Mexico / Nuevo Leon          | Human | Female | 49 | Hospitalized | Oropharyngeal swab  |
| hCoV-19/Mexico/NLE-InDRE_F12689_S1389/2021 EPI_ISL_1661554 | 31/03/21 | North America / Mexico / Nuevo Leon          | Human | Female | 70 | Hospitalized | Oropharyngeal swab  |
| hCoV-19/Mexico/NLE-InDRE_F12690_S1390/2021 EPI_ISL_1661555 | 31/03/21 | North America / Mexico / Nuevo Leon          | Human | Male   | 44 | Hospitalized | Oropharyngeal swab  |
| hCoV-19/Mexico/NLE-InDRE_F12691_S1391/2021 EPI_ISL_1661556 | 31/03/21 | North America / Mexico / Nuevo Leon          | Human | Female | 30 | Hospitalized | Oropharyngeal swab  |
| hCoV-19/Mexico/SLP-InDRE_F12692_S1392/2021 EPI_ISL_1661557 | 31/03/21 | North America / Mexico / San Luis Potosi     | Human | Female | 74 | Hospitalized | Oropharyngeal swab  |
| hCoV-19/Mexico/NLE-InDRE_F12695_S1393/2021 EPI_ISL_1661558 | 30/03/21 | North America / Mexico / Nuevo Leon          | Human | Female | 55 | Released     | Oropharyngeal swab  |
| hCoV-19/Mexico/NLE-InDRE_F12696_S1394/2021 EPI_ISL_1661559 | 31/03/21 | North America / Mexico / Nuevo Leon          | Human | Female | 55 | Released     | Oropharyngeal swab  |
| hCoV-19/Mexico/NLE-InDRE_F12697_S1395/2021 EPI_ISL_1661560 | 31/03/21 | North America / Mexico / Nuevo Leon          | Human | Female | 42 | Released     | Oropharyngeal swab  |
| hCoV-19/Mexico/NLE-InDRE_F12698_S1396/2021 EPI_ISL_1661561 | 31/03/21 | North America / Mexico / Nuevo Leon          | Human | Female | 22 | Released     | Oropharyngeal swab  |
| hCoV-19/Mexico/NLE-InDRE_F12699_S1397/2021 EPI_ISL_1661562 | 31/03/21 | North America / Mexico / Nuevo Leon          | Human | Male   | 19 | Released     | Oropharyngeal swab  |
| hCoV-19/Mexico/NLE-InDRE_F12700_S1398/2021 EPI_ISL_1661563 | 31/03/21 | North America / Mexico / Nuevo Leon          | Human | Male   | 71 | Released     | Oropharyngeal swab  |
| hCoV-19/Mexico/NLE-InDRE_F12701_S1399/2021 EPI_ISL_1661564 | 31/03/21 | North America / Mexico / Nuevo Leon          | Human | Male   | 13 | Released     | Oropharyngeal swab  |
| hCoV-19/Mexico/GUA-InDRE_F12706_S1400/2021 EPI_ISL_1661565 | 30/03/21 | North America / Mexico / Guanajuato          | Human | Female | 76 | Hospitalized | Oropharyngeal swab  |
| hCoV-19/Mexico/GUA-InDRE_F12707_S1401/2021 EPI_ISL_1661566 | 31/03/21 | North America / Mexico / Guanajuato          | Human | Female | 79 | Hospitalized | Oropharyngeal swab  |
| hCoV-19/Mexico/GUA-InDRE_F12712_S1402/2021 EPI_ISL_1661567 | 30/03/21 | North America / Mexico / Guanajuato          | Human | Male   | 88 | Live         | Oropharyngeal swab  |
| hCoV-19/Mexico/GUA-InDRE_F12714_S1403/2021 EPI_ISL_1661568 | 30/03/21 | North America / Mexico / Guanajuato          | Human | Male   | 56 | Released     | Oropharyngeal swab  |
| hCoV-19/Mexico/GUA-InDRE_F12715_S1404/2021 EPI_ISL_1661569 | 31/03/21 | North America / Mexico / Guanajuato          | Human | Male   | 21 | Released     | Oropharyngeal swab  |
| hCoV-19/Mexico/GRO-InDRE_F12806_S1405/2021 EPI_ISL_1661570 | 30/03/21 | North America / Mexico / Guerrero            | Human | Male   | 83 | Hospitalized | Oropharyngeal swab  |
| iCoV-19/Mexico/AGU_LANGEBIO_IMSS_0460/2021 EPI_ISL_1661977 | 24/03/21 | North America / Mexico / Aguascalientes      | Human | Male   | 41 | Ambulatory   | Nasopharyngeal swab |
| iCoV-19/Mexico/AGU_LANGEBIO_IMSS_0487/2021 EPI_ISL_1661978 | 30/03/21 | North America / Mexico / Aguascalientes      | Human | Female | 45 | Ambulatory   | Nasopharyngeal swab |
| iCoV-19/Mexico/BCS_LANGEBIO_IMSS_0356/2021 EPI_ISL_1661979 | 23/03/21 | North America / Mexico / Baja California Sur | Human | Male   | 47 | Hospitalized | Nasopharyngeal swab |
| iCoV-19/Mexico/BCS_LANGEBIO_IMSS_0368/2021 EPI_ISL_1661980 | 22/03/21 | North America / Mexico / Baja California Sur | Human | Female | 31 | Ambulatory   | Nasopharyngeal swab |
| iCoV-19/Mexico/CHH_LANGEBIO_IMSS_0259/2021 EPI_ISL_1661983 | 24/03/21 | North America / Mexico / Chihuahua           | Human | Female | 43 | Ambulatory   | Nasopharyngeal swab |
| iCoV-19/Mexico/CHH_LANGEBIO_IMSS_0280/2021 EPI_ISL_1661989 | 28/03/21 | North America / Mexico / Chihuahua           | Human | Male   | 40 | Hospitalized | Nasopharyngeal swab |
| iCoV-19/Mexico/CMX_LANGEBIO_IMSS_0372/2021 EPI_ISL_1661991 | 22/03/21 | North America / Mexico / Mexico City         | Human | Female | 25 | Ambulatory   | Nasopharyngeal swab |
| iCoV-19/Mexico/CMX_LANGEBIO_IMSS_0385/2021 EPI_ISL_1661993 | 23/03/21 | North America / Mexico / Mexico City         | Human | Female | 72 | Hospitalized | Pharyngeal swab     |
| iCoV-19/Mexico/CMX_LANGEBIO_IMSS_0415/2021 EPI_ISL_1661995 | 24/03/21 | North America / Mexico / Mexico City         | Human | Male   | 95 | Hospitalized | Nasopharyngeal swab |
| iCoV-19/Mexico/CMX_LANGEBIO_IMSS_0416/2021 EPI_ISL_1661996 | 23/03/21 | North America / Mexico / Mexico City         | Human | Male   | 50 | Ambulatory   | Nasopharyngeal swab |
| iCoV-19/Mexico/CMX_LANGEBIO_IMSS_0417/2021 EPI_ISL_1661997 | 21/03/21 | North America / Mexico / Mexico City         | Human | Male   | 70 | Hospitalized | Nasopharyngeal swab |
| iCoV-19/Mexico/CMX_LANGEBIO_IMSS_0419/2021 EPI_ISL_1661998 | 24/03/21 | North America / Mexico / Mexico City         | Human | Male   | 63 | Hospitalized | Nasopharyngeal swab |

|                                                           |          |                                      |       |        |    |              |                     |
|-----------------------------------------------------------|----------|--------------------------------------|-------|--------|----|--------------|---------------------|
| 1CoV-19/Mexico/CMX_LANGEBIO_IMSS_0421/2021EPI_ISL_1661999 | 23/03/21 | North America / Mexico / Mexico City | Human | Male   | 65 | Hospitalized | Pharyngeal swab     |
| 1CoV-19/Mexico/CMX_LANGEBIO_IMSS_0432/2021EPI_ISL_1662001 | 24/03/21 | North America / Mexico / Mexico City | Human | Female | 22 | Ambulatory   | Nasopharyngeal swab |
| 1CoV-19/Mexico/CMX_LANGEBIO_IMSS_0433/2021EPI_ISL_1662002 | 25/03/21 | North America / Mexico / Mexico City | Human | Male   | 73 | Ambulatory   | Nasopharyngeal swab |
| 1CoV-19/Mexico/CMX_LANGEBIO_IMSS_0434/2021EPI_ISL_1662003 | 24/03/21 | North America / Mexico / Mexico City | Human | Male   | 65 | Hospitalized | Nasopharyngeal swab |
| 1CoV-19/Mexico/CMX_LANGEBIO_IMSS_0435/2021EPI_ISL_1662004 | 25/03/21 | North America / Mexico / Mexico City | Human | Male   | 93 | Hospitalized | Pharyngeal swab     |
| 1CoV-19/Mexico/CMX_LANGEBIO_IMSS_0436/2021EPI_ISL_1662005 | 25/03/21 | North America / Mexico / Mexico City | Human | Male   | 55 | Hospitalized | Pharyngeal swab     |
| 1CoV-19/Mexico/CMX_LANGEBIO_IMSS_0437/2021EPI_ISL_1662006 | 25/03/21 | North America / Mexico / Mexico City | Human | Male   | 68 | Ambulatory   | Pharyngeal swab     |
| 1CoV-19/Mexico/CMX_LANGEBIO_IMSS_0446/2021EPI_ISL_1662007 | 26/03/21 | North America / Mexico / Mexico City | Human | Male   | 67 | Hospitalized | Nasopharyngeal swab |
| 1CoV-19/Mexico/CMX_LANGEBIO_IMSS_0449/2021EPI_ISL_1662008 | 25/03/21 | North America / Mexico / Mexico City | Human | Male   | 80 | Hospitalized | Nasopharyngeal swab |
| 1CoV-19/Mexico/CMX_LANGEBIO_IMSS_0450/2021EPI_ISL_1662009 | 25/03/21 | North America / Mexico / Mexico City | Human | Female | 79 | Hospitalized | Nasopharyngeal swab |
| 1CoV-19/Mexico/CMX_LANGEBIO_IMSS_0453/2021EPI_ISL_1662010 | 26/03/21 | North America / Mexico / Mexico City | Human | Female | 51 | Hospitalized | Nasopharyngeal swab |
| 1CoV-19/Mexico/CMX_LANGEBIO_IMSS_0454/2021EPI_ISL_1662011 | 26/03/21 | North America / Mexico / Mexico City | Human | Male   | 70 | Hospitalized | Pharyngeal swab     |
| 1CoV-19/Mexico/CMX_LANGEBIO_IMSS_0455/2021EPI_ISL_1662012 | 25/03/21 | North America / Mexico / Mexico City | Human | Male   | 59 | Hospitalized | Pharyngeal swab     |
| 1CoV-19/Mexico/CMX_LANGEBIO_IMSS_0456/2021EPI_ISL_1662013 | 26/03/21 | North America / Mexico / Mexico City | Human | Male   | 81 | Hospitalized | Pharyngeal swab     |
| 1CoV-19/Mexico/CMX_LANGEBIO_IMSS_0459/2021EPI_ISL_1662014 | 25/03/21 | North America / Mexico / Mexico City | Human | Male   | 0  | Ambulatory   | Pharyngeal swab     |
| 1CoV-19/Mexico/CMX_LANGEBIO_IMSS_0469/2021EPI_ISL_1662015 | 28/03/21 | North America / Mexico / Mexico City | Human | Female | 24 | Hospitalized | Nasopharyngeal swab |
| 1CoV-19/Mexico/CMX_LANGEBIO_IMSS_0470/2021EPI_ISL_1662016 | 26/03/21 | North America / Mexico / Mexico City | Human | Male   | 30 | Ambulatory   | Pharyngeal swab     |
| 1CoV-19/Mexico/CMX_LANGEBIO_IMSS_0473/2021EPI_ISL_1662017 | 27/03/21 | North America / Mexico / Mexico City | Human | Female | 36 | Ambulatory   | Nasopharyngeal swab |
| 1CoV-19/Mexico/CMX_LANGEBIO_IMSS_0474/2021EPI_ISL_1662018 | 27/03/21 | North America / Mexico / Mexico City | Human | Male   | 83 | Hospitalized | Pharyngeal swab     |
| 1CoV-19/Mexico/CMX_LANGEBIO_IMSS_0475/2021EPI_ISL_1662019 | 26/03/21 | North America / Mexico / Mexico City | Human | Female | 66 | Hospitalized | Pharyngeal swab     |
| 1CoV-19/Mexico/CMX_LANGEBIO_IMSS_0476/2021EPI_ISL_1662020 | 28/03/21 | North America / Mexico / Mexico City | Human | Female | 71 | Ambulatory   | Pharyngeal swab     |
| 1CoV-19/Mexico/CMX_LANGEBIO_IMSS_0477/2021EPI_ISL_1662021 | 28/03/21 | North America / Mexico / Mexico City | Human | Male   | 67 | Hospitalized | Pharyngeal swab     |
| 1CoV-19/Mexico/CMX_LANGEBIO_IMSS_0480/2021EPI_ISL_1662022 | 26/03/21 | North America / Mexico / Mexico City | Human | Male   | 20 | Ambulatory   | Nasopharyngeal swab |
| 1CoV-19/Mexico/CMX_LANGEBIO_IMSS_0489/2021EPI_ISL_1662024 | 01/04/21 | North America / Mexico / Mexico City | Human | Male   | 43 | Hospitalized | Pharyngeal swab     |
| 1CoV-19/Mexico/CMX_LANGEBIO_IMSS_0490/2021EPI_ISL_1662025 | 23/03/21 | North America / Mexico / Mexico City | Human | Female | 66 | Hospitalized | Pharyngeal swab     |
| 1CoV-19/Mexico/CMX_LANGEBIO_IMSS_0491/2021EPI_ISL_1662026 | 31/03/21 | North America / Mexico / Mexico City | Human | Male   | 45 | Hospitalized | Nasopharyngeal swab |
| 1CoV-19/Mexico/CMX_LANGEBIO_IMSS_0492/2021EPI_ISL_1662027 | 02/04/21 | North America / Mexico / Mexico City | Human | Male   | 56 | Hospitalized | Nasopharyngeal swab |
| 1CoV-19/Mexico/CMX_LANGEBIO_IMSS_0494/2021EPI_ISL_1662028 | 01/04/21 | North America / Mexico / Mexico City | Human | Male   | 66 | Hospitalized | Pharyngeal swab     |
| 1CoV-19/Mexico/CMX_LANGEBIO_IMSS_0497/2021EPI_ISL_1662029 | 03/04/21 | North America / Mexico / Mexico City | Human | Male   | 82 | Ambulatory   | Pharyngeal swab     |
| 1CoV-19/Mexico/CMX_LANGEBIO_IMSS_0499/2021EPI_ISL_1662031 | 01/04/21 | North America / Mexico / Mexico City | Human | Male   | 89 | Hospitalized | Nasopharyngeal swab |
| 1CoV-19/Mexico/CMX_LANGEBIO_IMSS_0500/2021EPI_ISL_1662032 | 01/04/21 | North America / Mexico / Mexico City | Human | Female | 58 | Hospitalized | Nasopharyngeal swab |
| 1CoV-19/Mexico/CMX_LANGEBIO_IMSS_0501/2021EPI_ISL_1662033 | 04/04/21 | North America / Mexico / Mexico City | Human | Male   | 37 | Hospitalized | Nasopharyngeal swab |
| 1CoV-19/Mexico/COA_LANGEBIO_IMSS_0239/2021EPI_ISL_1662035 | 22/03/21 | North America / Mexico / Coahuila    | Human | Male   | 52 | Ambulatory   | Nasopharyngeal swab |
| 1CoV-19/Mexico/COA_LANGEBIO_IMSS_0255/2021EPI_ISL_1662039 | 25/03/21 | North America / Mexico / Coahuila    | Human | Male   | 55 | Hospitalized | Nasopharyngeal swab |
| 1CoV-19/Mexico/COA_LANGEBIO_IMSS_0261/2021EPI_ISL_1662042 | 28/03/21 | North America / Mexico / Coahuila    | Human | Male   | 49 | Hospitalized | Nasopharyngeal swab |
| 1CoV-19/Mexico/COA_LANGEBIO_IMSS_0269/2021EPI_ISL_1662043 | 30/03/21 | North America / Mexico / Coahuila    | Human | Female | 45 | Ambulatory   | Nasopharyngeal swab |
| 1CoV-19/Mexico/COA_LANGEBIO_IMSS_0270/2021EPI_ISL_1662043 | 30/03/21 | North America / Mexico / Coahuila    | Human | Male   | 50 | Hospitalized | Nasopharyngeal swab |
| 1CoV-19/Mexico/COA_LANGEBIO_IMSS_0272/2021EPI_ISL_1662044 | 29/03/21 | North America / Mexico / Coahuila    | Human | Female | 53 | Hospitalized | Nasopharyngeal swab |
| 1CoV-19/Mexico/COA_LANGEBIO_IMSS_0273/2021EPI_ISL_1662045 | 30/03/21 | North America / Mexico / Coahuila    | Human | Male   | 26 | Ambulatory   | Nasopharyngeal swab |
| 1CoV-19/Mexico/COA_LANGEBIO_IMSS_0274/2021EPI_ISL_1662046 | 31/03/21 | North America / Mexico / Coahuila    | Human | Female | 23 | Ambulatory   | Nasopharyngeal swab |
| 1CoV-19/Mexico/COA_LANGEBIO_IMSS_0284/2021EPI_ISL_1662048 | 01/04/21 | North America / Mexico / Coahuila    | Human | Male   | 44 | Hospitalized | Nasopharyngeal swab |
| 1CoV-19/Mexico/DUR_LANGEBIO_IMSS_0248/2021EPI_ISL_1662049 | 24/03/21 | North America / Mexico / Durango     | Human | Male   | 30 | Ambulatory   | Nasopharyngeal swab |
| 1CoV-19/Mexico/DUR_LANGEBIO_IMSS_0249/2021EPI_ISL_1662050 | 23/03/21 | North America / Mexico / Durango     | Human | Male   | 73 | Hospitalized | Nasopharyngeal swab |
| 1CoV-19/Mexico/DUR_LANGEBIO_IMSS_0256/2021EPI_ISL_1662051 | 26/03/21 | North America / Mexico / Durango     | Human | Male   | 45 | Hospitalized | Nasopharyngeal swab |

|                                                           |          |                                          |       |        |    |              |                     |
|-----------------------------------------------------------|----------|------------------------------------------|-------|--------|----|--------------|---------------------|
| 1CoV-19/Mexico/DUR_LANGEBIO_IMSS_0258/2021EPI_ISL_1662053 | 26/03/21 | North America / Mexico / Durango         | Human | Male   | 23 | Ambulatory   | Nasopharyngeal swab |
| 1CoV-19/Mexico/DUR_LANGEBIO_IMSS_0265/2021EPI_ISL_1662055 | 29/03/21 | North America / Mexico / Durango         | Human | Male   | 19 | Ambulatory   | Nasopharyngeal swab |
| 1CoV-19/Mexico/DUR_LANGEBIO_IMSS_0266/2021EPI_ISL_1662056 | 29/03/21 | North America / Mexico / Durango         | Human | Female | 40 | Ambulatory   | Nasopharyngeal swab |
| 1CoV-19/Mexico/GRO_LANGEBIO_IMSS_0424/2021EPI_ISL_1662058 | 21/03/21 | North America / Mexico / Guerrero        | Human | Female | 66 | Hospitalized | Nasopharyngeal swab |
| 1CoV-19/Mexico/GRO_LANGEBIO_IMSS_0425/2021EPI_ISL_1662059 | 22/03/21 | North America / Mexico / Guerrero        | Human | Female | 68 | Hospitalized | Nasopharyngeal swab |
| 1CoV-19/Mexico/GRO_LANGEBIO_IMSS_0444/2021EPI_ISL_1662060 | 23/03/21 | North America / Mexico / Guerrero        | Human | Male   | 84 | Ambulatory   | Nasopharyngeal swab |
| 1CoV-19/Mexico/GRO_LANGEBIO_IMSS_0485/2021EPI_ISL_1662061 | 28/03/21 | North America / Mexico / Guerrero        | Human | Male   | 52 | Hospitalized | Pharyngeal swab     |
| 1CoV-19/Mexico/GUA_LANGEBIO_IMSS_0308/2021EPI_ISL_1662062 | 08/03/21 | North America / Mexico / Guanajuato      | Human | Female | 41 | Ambulatory   | Nasopharyngeal swab |
| 1CoV-19/Mexico/GUA_LANGEBIO_IMSS_0309/2021EPI_ISL_1662063 | 10/03/21 | North America / Mexico / Guanajuato      | Human | Male   | 66 | Ambulatory   | Nasopharyngeal swab |
| 1CoV-19/Mexico/GUA_LANGEBIO_IMSS_0310/2021EPI_ISL_1662064 | 09/03/21 | North America / Mexico / Guanajuato      | Human | Female | 42 | Ambulatory   | Nasopharyngeal swab |
| 1CoV-19/Mexico/GUA_LANGEBIO_IMSS_0318/2021EPI_ISL_1662065 | 19/03/21 | North America / Mexico / Guanajuato      | Human | Male   | 72 | Ambulatory   | Nasopharyngeal swab |
| 1CoV-19/Mexico/GUA_LANGEBIO_IMSS_0321/2021EPI_ISL_1662066 | 18/03/21 | North America / Mexico / Guanajuato      | Human | Female | 37 | Ambulatory   | Nasopharyngeal swab |
| 1CoV-19/Mexico/GUA_LANGEBIO_IMSS_0332/2021EPI_ISL_1662067 | 22/03/21 | North America / Mexico / Guanajuato      | Human | Male   | 56 | Hospitalized | Nasopharyngeal swab |
| 1CoV-19/Mexico/GUA_LANGEBIO_IMSS_0344/2021EPI_ISL_1662068 | 23/03/21 | North America / Mexico / Guanajuato      | Human | Female | 81 | Ambulatory   | Nasopharyngeal swab |
| 1CoV-19/Mexico/GUA_LANGEBIO_IMSS_0359/2021EPI_ISL_1662069 | 26/03/21 | North America / Mexico / Guanajuato      | Human | Female | 31 | Ambulatory   | Nasopharyngeal swab |
| hCoV-19/Mexico/HID_LANGEBIO_IMSS_0389/2021EPI_ISL_1662070 | 22/03/21 | North America / Mexico / Hidalgo         | Human | Male   | 34 | Hospitalized | Pharyngeal swab     |
| hCoV-19/Mexico/HID_LANGEBIO_IMSS_0452/2021EPI_ISL_1662071 | 26/03/21 | North America / Mexico / Hidalgo         | Human | Female | 45 | Ambulatory   | Pharyngeal swab     |
| hCoV-19/Mexico/HID_LANGEBIO_IMSS_0468/2021EPI_ISL_1662072 | 10/03/21 | North America / Mexico / Hidalgo         | Human | Male   | 61 | Ambulatory   | Pharyngeal swab     |
| hCoV-19/Mexico/HID_LANGEBIO_IMSS_0472/2021EPI_ISL_1662073 | 26/03/21 | North America / Mexico / Hidalgo         | Human | Female | 64 | Hospitalized | Nasopharyngeal swab |
| hCoV-19/Mexico/HID_LANGEBIO_IMSS_0493/2021EPI_ISL_1662074 | 01/04/21 | North America / Mexico / Hidalgo         | Human | Male   | 25 | Ambulatory   | Nasopharyngeal swab |
| hCoV-19/Mexico/JAL_LANGEBIO_IMSS_0314/2021EPI_ISL_1662075 | 13/03/21 | North America / Mexico / Jalisco         | Human | Female | 49 | Hospitalized | Nasopharyngeal swab |
| hCoV-19/Mexico/JAL_LANGEBIO_IMSS_0315/2021EPI_ISL_1662076 | 14/03/21 | North America / Mexico / Jalisco         | Human | Female | 54 | Hospitalized | Nasopharyngeal swab |
| hCoV-19/Mexico/JAL_LANGEBIO_IMSS_0319/2021EPI_ISL_1662078 | 22/03/21 | North America / Mexico / Jalisco         | Human | Female | 70 | Hospitalized | Pharyngeal swab     |
| hCoV-19/Mexico/JAL_LANGEBIO_IMSS_0326/2021EPI_ISL_1662081 | 23/03/21 | North America / Mexico / Jalisco         | Human | Female | 42 | Ambulatory   | Nasopharyngeal swab |
| hCoV-19/Mexico/JAL_LANGEBIO_IMSS_0328/2021EPI_ISL_1662083 | 23/03/21 | North America / Mexico / Jalisco         | Human | Female | 56 | Hospitalized | Nasopharyngeal swab |
| hCoV-19/Mexico/JAL_LANGEBIO_IMSS_0329/2021EPI_ISL_1662084 | 23/03/21 | North America / Mexico / Jalisco         | Human | Female | 24 | Ambulatory   | Nasopharyngeal swab |
| hCoV-19/Mexico/JAL_LANGEBIO_IMSS_0330/2021EPI_ISL_1662085 | 23/03/21 | North America / Mexico / Jalisco         | Human | Female | 97 | Hospitalized | Nasopharyngeal swab |
| hCoV-19/Mexico/JAL_LANGEBIO_IMSS_0334/2021EPI_ISL_1662087 | 23/03/21 | North America / Mexico / Jalisco         | Human | Male   | 54 | Ambulatory   | Nasopharyngeal swab |
| hCoV-19/Mexico/JAL_LANGEBIO_IMSS_0342/2021EPI_ISL_1662088 | 25/03/21 | North America / Mexico / Jalisco         | Human | Female | 51 | Ambulatory   | Nasopharyngeal swab |
| hCoV-19/Mexico/JAL_LANGEBIO_IMSS_0343/2021EPI_ISL_1662089 | 25/03/21 | North America / Mexico / Jalisco         | Human | Female | 35 | Ambulatory   | Nasopharyngeal swab |
| hCoV-19/Mexico/JAL_LANGEBIO_IMSS_0345/2021EPI_ISL_1662090 | 24/03/21 | North America / Mexico / Jalisco         | Human | Male   | 71 | Hospitalized | Nasopharyngeal swab |
| hCoV-19/Mexico/JAL_LANGEBIO_IMSS_0347/2021EPI_ISL_1662092 | 25/03/21 | North America / Mexico / Jalisco         | Human | Female | 24 | Ambulatory   | Nasopharyngeal swab |
| hCoV-19/Mexico/JAL_LANGEBIO_IMSS_0348/2021EPI_ISL_1662093 | 25/03/21 | North America / Mexico / Jalisco         | Human | Male   | 39 | Hospitalized | Nasopharyngeal swab |
| hCoV-19/Mexico/JAL_LANGEBIO_IMSS_0349/2021EPI_ISL_1662094 | 25/03/21 | North America / Mexico / Jalisco         | Human | Male   | 75 | Hospitalized | Pharyngeal swab     |
| hCoV-19/Mexico/JAL_LANGEBIO_IMSS_0350/2021EPI_ISL_1662095 | 25/03/21 | North America / Mexico / Jalisco         | Human | Female | 71 | Hospitalized | Pharyngeal swab     |
| hCoV-19/Mexico/JAL_LANGEBIO_IMSS_0354/2021EPI_ISL_1662096 | 25/03/21 | North America / Mexico / Jalisco         | Human | Male   | 76 | Hospitalized | Nasopharyngeal swab |
| hCoV-19/Mexico/JAL_LANGEBIO_IMSS_0358/2021EPI_ISL_1662097 | 26/03/21 | North America / Mexico / Jalisco         | Human | Male   | 44 | Ambulatory   | Nasopharyngeal swab |
| hCoV-19/Mexico/JAL_LANGEBIO_IMSS_0360/2021EPI_ISL_1662098 | 27/03/21 | North America / Mexico / Jalisco         | Human | Male   | 88 | Hospitalized | Pharyngeal swab     |
| hCoV-19/Mexico/JAL_LANGEBIO_IMSS_0364/2021EPI_ISL_1662100 | 29/03/21 | North America / Mexico / Jalisco         | Human | Female | 30 | Ambulatory   | Nasopharyngeal swab |
| hCoV-19/Mexico/JAL_LANGEBIO_IMSS_0367/2021EPI_ISL_1662103 | 29/03/21 | North America / Mexico / Jalisco         | Human | Male   | 59 | Hospitalized | Nasopharyngeal swab |
| 1CoV-19/Mexico/MEX_LANGEBIO_IMSS_0373/2021EPI_ISL_1662104 | 22/03/21 | North America / Mexico / State of Mexico | Human | Female | 39 | Ambulatory   | Nasopharyngeal swab |
| 1CoV-19/Mexico/MEX_LANGEBIO_IMSS_0375/2021EPI_ISL_1662105 | 23/03/21 | North America / Mexico / State of Mexico | Human | Male   | 21 | Ambulatory   | Nasopharyngeal swab |
| 1CoV-19/Mexico/MEX_LANGEBIO_IMSS_0377/2021EPI_ISL_1662106 | 22/03/21 | North America / Mexico / State of Mexico | Human | Female | 73 | Hospitalized | Nasopharyngeal swab |
| 1CoV-19/Mexico/MEX_LANGEBIO_IMSS_0379/2021EPI_ISL_1662107 | 22/03/21 | North America / Mexico / State of Mexico | Human | Male   | 64 | Hospitalized | Nasopharyngeal swab |

|                                                           |          |                                          |       |        |    |              |                     |
|-----------------------------------------------------------|----------|------------------------------------------|-------|--------|----|--------------|---------------------|
| 1CoV-19/Mexico/MEX_LANGEBIO_IMSS_0418/2021EPI_ISL_1662108 | 23/03/21 | North America / Mexico / State of Mexico | Human | Female | 53 | Hospitalized | Nasopharyngeal swab |
| 1CoV-19/Mexico/MEX_LANGEBIO_IMSS_0422/2021EPI_ISL_1662109 | 22/03/21 | North America / Mexico / State of Mexico | Human | Male   | 86 | Hospitalized | Nasopharyngeal swab |
| 1CoV-19/Mexico/MEX_LANGEBIO_IMSS_0423/2021EPI_ISL_1662110 | 22/03/21 | North America / Mexico / State of Mexico | Human | Male   | 41 | Hospitalized | Nasopharyngeal swab |
| 1CoV-19/Mexico/MEX_LANGEBIO_IMSS_0426/2021EPI_ISL_1662111 | 23/03/21 | North America / Mexico / State of Mexico | Human | Male   | 46 | Ambulatory   | Nasopharyngeal swab |
| 1CoV-19/Mexico/MEX_LANGEBIO_IMSS_0445/2021EPI_ISL_1662112 | 26/03/21 | North America / Mexico / State of Mexico | Human | Male   | 67 | Hospitalized | Nasopharyngeal swab |
| 1CoV-19/Mexico/MEX_LANGEBIO_IMSS_0447/2021EPI_ISL_1662113 | 25/03/21 | North America / Mexico / State of Mexico | Human | Male   | 52 | Hospitalized | Nasopharyngeal swab |
| 1CoV-19/Mexico/MEX_LANGEBIO_IMSS_0448/2021EPI_ISL_1662114 | 24/03/21 | North America / Mexico / State of Mexico | Human | Male   | 61 | Hospitalized | Nasopharyngeal swab |
| 1CoV-19/Mexico/MEX_LANGEBIO_IMSS_0451/2021EPI_ISL_1662115 | 25/03/21 | North America / Mexico / State of Mexico | Human | Female | 71 | Ambulatory   | Nasopharyngeal swab |
| 1CoV-19/Mexico/MEX_LANGEBIO_IMSS_0457/2021EPI_ISL_1662116 | 25/03/21 | North America / Mexico / State of Mexico | Human | Female | 73 | Hospitalized | Pharyngeal swab     |
| 1CoV-19/Mexico/MEX_LANGEBIO_IMSS_0478/2021EPI_ISL_1662117 | 28/03/21 | North America / Mexico / State of Mexico | Human | Female | 51 | Hospitalized | Nasopharyngeal swab |
| 1CoV-19/Mexico/MEX_LANGEBIO_IMSS_0481/2021EPI_ISL_1662118 | 26/03/21 | North America / Mexico / State of Mexico | Human | Male   | 39 | Hospitalized | Nasopharyngeal swab |
| 1CoV-19/Mexico/MEX_LANGEBIO_IMSS_0483/2021EPI_ISL_1662119 | 28/03/21 | North America / Mexico / State of Mexico | Human | Male   | 64 | Ambulatory   | Nasopharyngeal swab |
| 1CoV-19/Mexico/MEX_LANGEBIO_IMSS_0488/2021EPI_ISL_1662120 | 31/03/21 | North America / Mexico / State of Mexico | Human | Male   | 51 | Hospitalized | Nasopharyngeal swab |
| 1CoV-19/Mexico/MEX_LANGEBIO_IMSS_0496/2021EPI_ISL_1662121 | 02/04/21 | North America / Mexico / State of Mexico | Human | Male   | 50 | Ambulatory   | Nasopharyngeal swab |
| 1CoV-19/Mexico/MEX_LANGEBIO_IMSS_0502/2021EPI_ISL_1662122 | 31/03/21 | North America / Mexico / State of Mexico | Human | Female | 76 | Ambulatory   | Nasopharyngeal swab |
| hCoV-19/Mexico/MIC_LANGEBIO_IMSS_0323/2021EPI_ISL_1662123 | 16/03/21 | North America / Mexico / Michoacan       | Human | Female | 36 | Ambulatory   | Nasopharyngeal swab |
| hCoV-19/Mexico/MIC_LANGEBIO_IMSS_0331/2021EPI_ISL_1662124 | 21/03/21 | North America / Mexico / Michoacan       | Human | Male   | 36 | Hospitalized | Nasopharyngeal swab |
| 1CoV-19/Mexico/MOR_LANGEBIO_IMSS_0380/2021EPI_ISL_1662128 | 20/03/21 | North America / Mexico / Morelos         | Human | Male   | 52 | Hospitalized | Nasopharyngeal swab |
| 1CoV-19/Mexico/MOR_LANGEBIO_IMSS_0381/2021EPI_ISL_1662129 | 21/03/21 | North America / Mexico / Morelos         | Human | Male   | 80 | Hospitalized | Nasopharyngeal swab |
| 1CoV-19/Mexico/MOR_LANGEBIO_IMSS_0471/2021EPI_ISL_1662130 | 25/03/21 | North America / Mexico / Morelos         | Human | Male   | 64 | Hospitalized | Nasopharyngeal swab |
| 1CoV-19/Mexico/NAY_LANGEBIO_IMSS_0335/2021EPI_ISL_1662132 | 24/03/21 | North America / Mexico / Nayarit         | Human | Male   | 56 | Hospitalized | Nasopharyngeal swab |
| 1CoV-19/Mexico/NLE_LANGEBIO_IMSS_0241/2021EPI_ISL_1662133 | 24/03/21 | North America / Mexico / Nuevo Leon      | Human | Female | 56 | Ambulatory   | Nasopharyngeal swab |
| 1CoV-19/Mexico/NLE_LANGEBIO_IMSS_0244/2021EPI_ISL_1662136 | 23/03/21 | North America / Mexico / Nuevo Leon      | Human | Female | 80 | Hospitalized | Nasopharyngeal swab |
| 1CoV-19/Mexico/NLE_LANGEBIO_IMSS_0245/2021EPI_ISL_1662137 | 24/03/21 | North America / Mexico / Nuevo Leon      | Human | Male   | 58 | Ambulatory   | Nasopharyngeal swab |
| 1CoV-19/Mexico/NLE_LANGEBIO_IMSS_0246/2021EPI_ISL_1662138 | 24/03/21 | North America / Mexico / Nuevo Leon      | Human | Male   | 71 | Hospitalized | Nasopharyngeal swab |
| 1CoV-19/Mexico/NLE_LANGEBIO_IMSS_0252/2021EPI_ISL_1662141 | 25/03/21 | North America / Mexico / Nuevo Leon      | Human | Female | 22 | Ambulatory   | Nasopharyngeal swab |
| 1CoV-19/Mexico/NLE_LANGEBIO_IMSS_0260/2021EPI_ISL_1662142 | 26/03/21 | North America / Mexico / Nuevo Leon      | Human | Female | 29 | Ambulatory   | Nasopharyngeal swab |
| 1CoV-19/Mexico/NLE_LANGEBIO_IMSS_0263/2021EPI_ISL_1662143 | 30/03/21 | North America / Mexico / Nuevo Leon      | Human | Female | 44 | Hospitalized | Nasopharyngeal swab |
| 1CoV-19/Mexico/OAX_LANGEBIO_IMSS_0382/2021EPI_ISL_1662145 | 20/03/21 | North America / Mexico / Oaxaca          | Human | Female | 22 | Ambulatory   | Nasopharyngeal swab |
| 1CoV-19/Mexico/OAX_LANGEBIO_IMSS_0383/2021EPI_ISL_1662146 | 20/03/21 | North America / Mexico / Oaxaca          | Human | Male   | 49 | Ambulatory   | Nasopharyngeal swab |
| 1CoV-19/Mexico/OAX_LANGEBIO_IMSS_0461/2021EPI_ISL_1662147 | 22/03/21 | North America / Mexico / Oaxaca          | Human | Male   | 57 | Ambulatory   | Nasopharyngeal swab |
| 1CoV-19/Mexico/PUE_LANGEBIO_IMSS_0369/2021EPI_ISL_1662149 | 18/03/21 | North America / Mexico / Puebla          | Human | Male   | 38 | Ambulatory   | Nasopharyngeal swab |
| 1CoV-19/Mexico/PUE_LANGEBIO_IMSS_0370/2021EPI_ISL_1662150 | 18/03/21 | North America / Mexico / Puebla          | Human | Male   | 59 | Ambulatory   | Nasopharyngeal swab |
| 1CoV-19/Mexico/PUE_LANGEBIO_IMSS_0390/2021EPI_ISL_1662151 | 19/03/21 | North America / Mexico / Puebla          | Human | Male   | 45 | Ambulatory   | Pharyngeal swab     |
| 1CoV-19/Mexico/PUE_LANGEBIO_IMSS_0391/2021EPI_ISL_1662152 | 19/03/21 | North America / Mexico / Puebla          | Human | Male   | 40 | Ambulatory   | Pharyngeal swab     |
| 1CoV-19/Mexico/PUE_LANGEBIO_IMSS_0393/2021EPI_ISL_1662153 | 19/03/21 | North America / Mexico / Puebla          | Human | Male   | 30 | Ambulatory   | Pharyngeal swab     |
| 1CoV-19/Mexico/PUE_LANGEBIO_IMSS_0394/2021EPI_ISL_1662154 | 19/03/21 | North America / Mexico / Puebla          | Human | Male   | 49 | Ambulatory   | Pharyngeal swab     |
| 1CoV-19/Mexico/PUE_LANGEBIO_IMSS_0396/2021EPI_ISL_1662155 | 22/03/21 | North America / Mexico / Puebla          | Human | Male   | 53 | Ambulatory   | Nasopharyngeal swab |
| 1CoV-19/Mexico/PUE_LANGEBIO_IMSS_0397/2021EPI_ISL_1662156 | 22/03/21 | North America / Mexico / Puebla          | Human | Female | 84 | Hospitalized | Nasopharyngeal swab |
| 1CoV-19/Mexico/PUE_LANGEBIO_IMSS_0399/2021EPI_ISL_1662158 | 21/03/21 | North America / Mexico / Puebla          | Human | Male   | 47 | Hospitalized | Nasopharyngeal swab |
| 1CoV-19/Mexico/PUE_LANGEBIO_IMSS_0400/2021EPI_ISL_1662159 | 21/03/21 | North America / Mexico / Puebla          | Human | Female | 37 | Hospitalized | Nasopharyngeal swab |
| 1CoV-19/Mexico/PUE_LANGEBIO_IMSS_0401/2021EPI_ISL_1662160 | 22/03/21 | North America / Mexico / Puebla          | Human | Male   | 79 | Hospitalized | Nasopharyngeal swab |
| 1CoV-19/Mexico/PUE_LANGEBIO_IMSS_0402/2021EPI_ISL_1662161 | 19/03/21 | North America / Mexico / Puebla          | Human | Male   | 72 | Hospitalized | Nasopharyngeal swab |
| 1CoV-19/Mexico/PUE_LANGEBIO_IMSS_0403/2021EPI_ISL_1662162 | 19/03/21 | North America / Mexico / Puebla          | Human | Male   | 49 | Hospitalized | Nasopharyngeal swab |

|                                                           |          |                                          |       |        |    |              |                        |
|-----------------------------------------------------------|----------|------------------------------------------|-------|--------|----|--------------|------------------------|
| 1CoV-19/Mexico/PUE_LANGEBIO_IMSS_0405/2021EPI_ISL_1662164 | 22/03/21 | North America / Mexico / Puebla          | Human | Male   | 51 | Ambulatory   | Nasopharyngeal swab    |
| 1CoV-19/Mexico/PUE_LANGEBIO_IMSS_0406/2021EPI_ISL_1662165 | 22/03/21 | North America / Mexico / Puebla          | Human | Male   | 41 | Ambulatory   | Nasopharyngeal swab    |
| 1CoV-19/Mexico/PUE_LANGEBIO_IMSS_0407/2021EPI_ISL_1662166 | 21/03/21 | North America / Mexico / Puebla          | Human | Female | 76 | Ambulatory   | Nasopharyngeal swab    |
| 1CoV-19/Mexico/PUE_LANGEBIO_IMSS_0408/2021EPI_ISL_1662167 | 21/03/21 | North America / Mexico / Puebla          | Human | Male   | 74 | Ambulatory   | Nasopharyngeal swab    |
| 1CoV-19/Mexico/PUE_LANGEBIO_IMSS_0409/2021EPI_ISL_1662168 | 20/03/21 | North America / Mexico / Puebla          | Human | Female | 23 | Ambulatory   | Pharyngeal swab        |
| 1CoV-19/Mexico/PUE_LANGEBIO_IMSS_0410/2021EPI_ISL_1662169 | 19/03/21 | North America / Mexico / Puebla          | Human | Female | 57 | Ambulatory   | Nasopharyngeal swab    |
| 1CoV-19/Mexico/PUE_LANGEBIO_IMSS_0439/2021EPI_ISL_1662171 | 23/03/21 | North America / Mexico / Puebla          | Human | Male   | 22 | Ambulatory   | Nasopharyngeal swab    |
| 1CoV-19/Mexico/PUE_LANGEBIO_IMSS_0441/2021EPI_ISL_1662173 | 23/03/21 | North America / Mexico / Puebla          | Human | Male   | 36 | Ambulatory   | Nasopharyngeal swab    |
| 1CoV-19/Mexico/PUE_LANGEBIO_IMSS_0442/2021EPI_ISL_1662174 | 23/03/21 | North America / Mexico / Puebla          | Human | Male   | 38 | Ambulatory   | Nasopharyngeal swab    |
| 1CoV-19/Mexico/PUE_LANGEBIO_IMSS_0463/2021EPI_ISL_1662175 | 25/03/21 | North America / Mexico / Puebla          | Human | Female | 27 | Ambulatory   | Nasopharyngeal swab    |
| 1CoV-19/Mexico/PUE_LANGEBIO_IMSS_0464/2021EPI_ISL_1662176 | 25/03/21 | North America / Mexico / Puebla          | Human | Male   | 33 | Ambulatory   | Nasopharyngeal swab    |
| 1CoV-19/Mexico/PUE_LANGEBIO_IMSS_0465/2021EPI_ISL_1662177 | 25/03/21 | North America / Mexico / Puebla          | Human | Female | 66 | Ambulatory   | Nasopharyngeal swab    |
| 1CoV-19/Mexico/PUE_LANGEBIO_IMSS_0466/2021EPI_ISL_1662178 | 24/03/21 | North America / Mexico / Puebla          | Human | Male   | 16 | Ambulatory   | Nasopharyngeal swab    |
| 1CoV-19/Mexico/PUE_LANGEBIO_IMSS_0484/2021EPI_ISL_1662179 | 30/03/21 | North America / Mexico / Puebla          | Human | Male   | 41 | Ambulatory   | Nasopharyngeal swab    |
| 1CoV-19/Mexico/PUE_LANGEBIO_IMSS_0486/2021EPI_ISL_1662180 | 29/03/21 | North America / Mexico / Puebla          | Human | Female | 45 | Ambulatory   | Nasopharyngeal swab    |
| 1CoV-19/Mexico/QUE_LANGEBIO_IMSS_0420/2021EPI_ISL_1662181 | 22/03/21 | North America / Mexico / Queretaro       | Human | Male   | 46 | Hospitalized | Nasopharyngeal swab    |
| 1CoV-19/Mexico/QUE_LANGEBIO_IMSS_0458/2021EPI_ISL_1662182 | 24/03/21 | North America / Mexico / Queretaro       | Human | Male   | 31 | Hospitalized | Nasopharyngeal swab    |
| 1CoV-19/Mexico/QUE_LANGEBIO_IMSS_0495/2021EPI_ISL_1662183 | 30/03/21 | North America / Mexico / Queretaro       | Human | Female | 34 | Ambulatory   | Nasopharyngeal swab    |
| 1CoV-19/Mexico/ROO_LANGEBIO_IMSS_0286/2021EPI_ISL_1662184 | 11/03/21 | North America / Mexico / Quintana Roo    | Human | Male   | 54 | Hospitalized | Nasopharyngeal swab    |
| hCoV-19/Mexico/SIN_LANGEBIO_IMSS_0311/2021EPI_ISL_1662186 | 09/03/21 | North America / Mexico / Sinaloa         | Human | Female | 77 | Hospitalized | Nasopharyngeal swab    |
| hCoV-19/Mexico/SIN_LANGEBIO_IMSS_0322/2021EPI_ISL_1662187 | 21/03/21 | North America / Mexico / Sinaloa         | Human | Male   | 64 | Hospitalized | Nasopharyngeal swab    |
| hCoV-19/Mexico/SIN_LANGEBIO_IMSS_0337/2021EPI_ISL_1662189 | 23/03/21 | North America / Mexico / Sinaloa         | Human | Male   | 65 | Hospitalized | Nasopharyngeal swab    |
| hCoV-19/Mexico/SIN_LANGEBIO_IMSS_0338/2021EPI_ISL_1662190 | 23/03/21 | North America / Mexico / Sinaloa         | Human | Female | 71 | Hospitalized | Nasopharyngeal swab    |
| hCoV-19/Mexico/SIN_LANGEBIO_IMSS_0340/2021EPI_ISL_1662192 | 22/03/21 | North America / Mexico / Sinaloa         | Human | Female | 60 | Hospitalized | Nasopharyngeal swab    |
| hCoV-19/Mexico/SIN_LANGEBIO_IMSS_0341/2021EPI_ISL_1662193 | 19/03/21 | North America / Mexico / Sinaloa         | Human | Male   | 28 | Ambulatory   | Nasopharyngeal swab    |
| 1CoV-19/Mexico/SLP_LANGEBIO_IMSS_0387/2021EPI_ISL_1662194 | 22/03/21 | North America / Mexico / San Luis Potosi | Human | Female | 60 | Hospitalized | Nasopharyngeal swab    |
| 1CoV-19/Mexico/SLP_LANGEBIO_IMSS_0443/2021EPI_ISL_1662195 | 24/03/21 | North America / Mexico / San Luis Potosi | Human | Female | 20 | Ambulatory   | Nasopharyngeal swab    |
| 1CoV-19/Mexico/SLP_LANGEBIO_IMSS_0479/2021EPI_ISL_1662196 | 27/03/21 | North America / Mexico / San Luis Potosi | Human | Female | 38 | Ambulatory   | Nasopharyngeal swab    |
| 1CoV-19/Mexico/SON_LANGEBIO_IMSS_0355/2021EPI_ISL_1662197 | 23/03/21 | North America / Mexico / Sonora          | Human | Female | 40 | Ambulatory   | Nasopharyngeal swab    |
| 1CoV-19/Mexico/SON_LANGEBIO_IMSS_0363/2021EPI_ISL_1662198 | 25/03/21 | North America / Mexico / Sonora          | Human | Female | 38 | Ambulatory   | Nasopharyngeal swab    |
| 1CoV-19/Mexico/TAM_LANGEBIO_IMSS_0271/2021EPI_ISL_1662199 | 29/03/21 | North America / Mexico / Tamaulipas      | Human | Female | 57 | Ambulatory   | Nasopharyngeal swab    |
| 1CoV-19/Mexico/TAM_LANGEBIO_IMSS_0282/2021EPI_ISL_1662200 | 30/03/21 | North America / Mexico / Tamaulipas      | Human | Female | 22 | Ambulatory   | Nasopharyngeal swab    |
| 1CoV-19/Mexico/TLA_LANGEBIO_IMSS_0371/2021EPI_ISL_1662201 | 20/03/21 | North America / Mexico / Tlaxcala        | Human | Female | 77 | Ambulatory   | Nasopharyngeal swab    |
| 1CoV-19/Mexico/VER_LANGEBIO_IMSS_0376/2021EPI_ISL_1662202 | 21/03/21 | North America / Mexico / Veracruz        | Human | Female | 60 | Hospitalized | Nasopharyngeal swab    |
| 1CoV-19/Mexico/VER_LANGEBIO_IMSS_0384/2021EPI_ISL_1662203 | 21/03/21 | North America / Mexico / Veracruz        | Human | Male   | 67 | Hospitalized | Nasopharyngeal swab    |
| 1CoV-19/Mexico/VER_LANGEBIO_IMSS_0386/2021EPI_ISL_1662204 | 18/03/21 | North America / Mexico / Veracruz        | Human | Female | 45 | Ambulatory   | Nasopharyngeal swab    |
| 1CoV-19/Mexico/VER_LANGEBIO_IMSS_0411/2021EPI_ISL_1662205 | 22/03/21 | North America / Mexico / Veracruz        | Human | Male   | 25 | Hospitalized | Bronchoalveolar lavage |
| 1CoV-19/Mexico/VER_LANGEBIO_IMSS_0412/2021EPI_ISL_1662206 | 22/03/21 | North America / Mexico / Veracruz        | Human | Male   | 48 | Ambulatory   | Nasopharyngeal swab    |
| 1CoV-19/Mexico/VER_LANGEBIO_IMSS_0413/2021EPI_ISL_1662207 | 23/03/21 | North America / Mexico / Veracruz        | Human | Male   | 25 | Ambulatory   | Nasopharyngeal swab    |
| 1CoV-19/Mexico/VER_LANGEBIO_IMSS_0414/2021EPI_ISL_1662208 | 23/03/21 | North America / Mexico / Veracruz        | Human | Male   | 73 | Hospitalized | Bronchoalveolar lavage |
| 1CoV-19/Mexico/VER_LANGEBIO_IMSS_0427/2021EPI_ISL_1662209 | 23/03/21 | North America / Mexico / Veracruz        | Human | Male   | 35 | Ambulatory   | Nasopharyngeal swab    |
| 1CoV-19/Mexico/VER_LANGEBIO_IMSS_0430/2021EPI_ISL_1662212 | 23/03/21 | North America / Mexico / Veracruz        | Human | Male   | 11 | Ambulatory   | Nasopharyngeal swab    |
| 1CoV-19/Mexico/YUC_LANGEBIO_IMSS_0287/2021EPI_ISL_1662214 | 22/03/21 | North America / Mexico / Yucatan         | Human | Male   | 60 | Ambulatory   | Nasopharyngeal swab    |
| 1CoV-19/Mexico/YUC_LANGEBIO_IMSS_0288/2021EPI_ISL_1662215 | 26/03/21 | North America / Mexico / Yucatan         | Human | Female | 51 | Hospitalized | Nasopharyngeal swab    |



|                                                            |          |                                              |       |        |    |              |                     |
|------------------------------------------------------------|----------|----------------------------------------------|-------|--------|----|--------------|---------------------|
| 1CoV-19/Mexico/YUC_LANGEBIO_IMSS_0289/2021EPI_ISL_1662216  | 25/03/21 | North America / Mexico / Yucatan             | Human | Male   | 73 | Hospitalized | Nasopharyngeal swab |
| 1CoV-19/Mexico/YUC_LANGEBIO_IMSS_0290/2021EPI_ISL_1662217  | 26/03/21 | North America / Mexico / Yucatan             | Human | Female | 86 | Hospitalized | Nasopharyngeal swab |
| 1CoV-19/Mexico/YUC_LANGEBIO_IMSS_0291/2021EPI_ISL_1662218  | 29/03/21 | North America / Mexico / Yucatan             | Human | Male   | 75 | Ambulatory   | Nasopharyngeal swab |
| 1CoV-19/Mexico/YUC_LANGEBIO_IMSS_0293/2021EPI_ISL_1662219  | 26/03/21 | North America / Mexico / Yucatan             | Human | Male   | 60 | Hospitalized | Nasopharyngeal swab |
| 1CoV-19/Mexico/YUC_LANGEBIO_IMSS_0294/2021EPI_ISL_1662220  | 30/03/21 | North America / Mexico / Yucatan             | Human | Male   | 76 | Hospitalized | Nasopharyngeal swab |
| 1CoV-19/Mexico/ZAC_LANGEBIO_IMSS_0295/2021EPI_ISL_1662221  | 22/03/21 | North America / Mexico / Zacatecas           | Human | Female | 66 | Hospitalized | Nasopharyngeal swab |
| 1CoV-19/Mexico/ZAC_LANGEBIO_IMSS_0296/2021EPI_ISL_1662222  | 22/03/21 | North America / Mexico / Zacatecas           | Human | Female | 22 | Hospitalized | Nasopharyngeal swab |
| 1CoV-19/Mexico/ZAC_LANGEBIO_IMSS_0297/2021EPI_ISL_1662223  | 22/03/21 | North America / Mexico / Zacatecas           | Human | Female | 22 | Ambulatory   | Nasopharyngeal swab |
| 1CoV-19/Mexico/ZAC_LANGEBIO_IMSS_0303/2021EPI_ISL_1662228  | 29/03/21 | North America / Mexico / Zacatecas           | Human | Male   | 77 | Hospitalized | Nasopharyngeal swab |
| 1CoV-19/Mexico/ZAC_LANGEBIO_IMSS_0304/2021EPI_ISL_1662229  | 29/03/21 | North America / Mexico / Zacatecas           | Human | Female | 32 | Ambulatory   | Nasopharyngeal swab |
| 1CoV-19/Mexico/ZAC_LANGEBIO_IMSS_0306/2021EPI_ISL_1662231  | 02/04/21 | North America / Mexico / Zacatecas           | Human | Female | 43 | Ambulatory   | Nasopharyngeal swab |
| 1CoV-19/Mexico/ZAC_LANGEBIO_IMSS_0307/2021EPI_ISL_1662232  | 01/04/21 | North America / Mexico / Zacatecas           | Human | Male   | 50 | Hospitalized | Nasopharyngeal swab |
| hCoV-19/Mexico/CMX-INER-SC480/2021 EPI_ISL_1672849         | 17/02/21 | North America / Mexico / Mexico City         | Human | Male   | 86 | Hospitalized |                     |
| hCoV-19/Mexico/CMX-INER-SC483/2021 EPI_ISL_1672864         | 18/02/21 | North America / Mexico / Mexico City         | Human | Male   | 62 | Hospitalized | Nasopharyngeal swab |
| hCoV-19/Mexico/CMX-INER-SC486/2021 EPI_ISL_1672865         | 18/02/21 | North America / Mexico / Mexico City         | Human | Male   | 57 | Deceased     | Nasopharyngeal swab |
| hCoV-19/Mexico/CMX-INER-SC498/2021 EPI_ISL_1672866         | 19/02/21 | North America / Mexico / Mexico City         | Human | Female | 67 | Hospitalized | Nasopharyngeal swab |
| hCoV-19/Mexico/CHH-InDRE_F12367_S1444/2021 EPI_ISL_1673267 | 23/03/21 | North America / Mexico / Chihuahua           | Human | Male   | 37 | Live         | Oropharyngeal swab  |
| hCoV-19/Mexico/CHH-InDRE_F12371_S1445/2021 EPI_ISL_1673268 | 22/03/21 | North America / Mexico / Chihuahua           | Human | Male   | 90 | Released     | Oropharyngeal swab  |
| hCoV-19/Mexico/GUA-InDRE_F12427_S1446/2021 EPI_ISL_1673269 | 15/03/21 | North America / Mexico / Guanajuato          | Human | Female | 49 | Deceased     | Oropharyngeal swab  |
| hCoV-19/Mexico/QUE-InDRE_F12490_S1454/2021 EPI_ISL_1673274 | 27/03/21 | North America / Mexico / Queretaro           | Human | Female | 63 | Hospitalized | Oropharyngeal swab  |
| hCoV-19/Mexico/CHP-InDRE_F11919_S1406/2021 EPI_ISL_1700795 | 18/03/21 | North America / Mexico / Chiapas             | Human | Female | 76 | Hospitalized | Oropharyngeal swab  |
| hCoV-19/Mexico/NLE-InDRE_F11937_S1409/2021 EPI_ISL_1700798 | 15/03/21 | North America / Mexico / Nuevo Leon          | Human | Male   | 69 | Hospitalized | Oropharyngeal swab  |
| hCoV-19/Mexico/JAL-InDRE_F11989_S1411/2021 EPI_ISL_1700800 | 21/03/21 | North America / Mexico / Jalisco             | Human | Male   | 84 | Deceased     | Oropharyngeal swab  |
| hCoV-19/Mexico/QUE-InDRE_F12125_S1415/2021 EPI_ISL_1700803 | 16/03/21 | North America / Mexico / Queretaro           | Human | Female | 63 | Released     | Oropharyngeal swab  |
| hCoV-19/Mexico/QUE-InDRE_F12131_S1416/2021 EPI_ISL_1700804 | 19/03/21 | North America / Mexico / Queretaro           | Human | Female | 45 | Released     | Oropharyngeal swab  |
| hCoV-19/Mexico/QUE-InDRE_F12141_S1418/2021 EPI_ISL_1700805 | 21/03/21 | North America / Mexico / Queretaro           | Human | Male   | 49 | Released     | Oropharyngeal swab  |
| hCoV-19/Mexico/QUE-InDRE_F12146_S1419/2021 EPI_ISL_1700806 | 22/03/21 | North America / Mexico / Queretaro           | Human | Male   | 43 | Released     | Oropharyngeal swab  |
| hCoV-19/Mexico/GRO-InDRE_F12175_S1423/2021 EPI_ISL_1700810 | 14/03/21 | North America / Mexico / Guerrero            | Human | Male   | 85 | Deceased     | Oropharyngeal swab  |
| hCoV-19/Mexico/VER-InDRE_F12180_S1425/2021 EPI_ISL_1700811 | 14/03/21 | North America / Mexico / Veracruz            | Human | Female | 70 | Deceased     | Oropharyngeal swab  |
| hCoV-19/Mexico/VER-InDRE_F12182_S1426/2021 EPI_ISL_1700812 | 16/03/21 | North America / Mexico / Veracruz            | Human | Female | 62 | Deceased     | Oropharyngeal swab  |
| hCoV-19/Mexico/VER-InDRE_F12183_S1427/2021 EPI_ISL_1700813 | 16/03/21 | North America / Mexico / Veracruz            | Human | Female | 27 | Hospitalized | Oropharyngeal swab  |
| hCoV-19/Mexico/COA-InDRE_F12230_S1433/2021 EPI_ISL_1700818 | 18/03/21 | North America / Mexico / Coahuila            | Human | Male   | 47 | Released     | Oropharyngeal swab  |
| hCoV-19/Mexico/BCS-InDRE_F12244_S1434/2021 EPI_ISL_1700819 | 20/03/21 | North America / Mexico / Baja California Sur | Human | Male   | 85 | Released     | Oropharyngeal swab  |
| hCoV-19/Mexico/NAY-InDRE_F12257_S1438/2021 EPI_ISL_1700823 | 16/03/21 | North America / Mexico / Nayarit             | Human | Male   | 58 | Hospitalized | Oropharyngeal swab  |
| hCoV-19/Mexico/CMX-InDRE_F12262_S1439/2021 EPI_ISL_1700824 | 15/03/21 | North America / Mexico / Mexico City         | Human | Male   | 70 | Released     | Oropharyngeal swab  |
| hCoV-19/Mexico/MEX-InDRE_F12287_S1440/2021 EPI_ISL_1700825 | 16/03/21 | North America / Mexico / State of Mexico     | Human | Male   | 24 | Hospitalized | Oropharyngeal swab  |
| hCoV-19/Mexico/MOR-InDRE_F12308_S1441/2021 EPI_ISL_1700826 | 23/03/21 | North America / Mexico / Morelos             | Human | Male   | 68 | Released     | Oropharyngeal swab  |
| hCoV-19/Mexico/MOR-InDRE_F12309_S1442/2021 EPI_ISL_1700827 | 23/03/21 | North America / Mexico / Morelos             | Human | Female | 74 | Released     | Oropharyngeal swab  |
| hCoV-19/Mexico/QUE-InDRE_F12500_S1455/2021 EPI_ISL_1700831 | 23/03/21 | North America / Mexico / Queretaro           | Human | Female | 60 | Released     | Oropharyngeal swab  |
| hCoV-19/Mexico/QUE-InDRE_F12502_S1456/2021 EPI_ISL_1700832 | 23/03/21 | North America / Mexico / Queretaro           | Human | Male   | 39 | Released     | Oropharyngeal swab  |
| hCoV-19/Mexico/ZAC-InDRE_F12520_S1457/2021 EPI_ISL_1700833 | 21/03/21 | North America / Mexico / Zacatecas           | Human | Male   | 57 | Deceased     | Oropharyngeal swab  |
| hCoV-19/Mexico/MOR-InDRE_F12331_S1459/2021 EPI_ISL_1700835 | 28/03/21 | North America / Mexico / Morelos             | Human | Male   | 44 | Hospitalized | Oropharyngeal swab  |
| hCoV-19/Mexico/BCN-InDRE_F12593_S1461/2021 EPI_ISL_1700837 | 08/03/21 | North America / Mexico / Baja California     | Human | Female | 42 | unknown      | Oropharyngeal swab  |
| hCoV-19/Mexico/MOR-InDRE_F12112_S1473/2021 EPI_ISL_1700840 | 22/03/21 | North America / Mexico / Morelos             | Human | Female | 26 | Released     | Oropharyngeal swab  |

|                                            |                 |          |                                       |       |        |    |              |                    |
|--------------------------------------------|-----------------|----------|---------------------------------------|-------|--------|----|--------------|--------------------|
| hCoV-19/Mexico/ROO-InDRE_F12253_S1474/2021 | EPI_ISL_1710963 | 17/03/21 | North America / Mexico / Quintana Roo | Human | Male   | 42 | Hospitalized | Oropharyngeal swab |
| hCoV-19/Mexico/CMX-InDRE_F12281_S1475/2021 | EPI_ISL_1710964 | 19/03/21 | North America / Mexico / Mexico City  | Human | Female | 14 | Released     | Oropharyngeal swab |
| hCoV-19/Mexico/CMX-InDRE_F12285_S1476/2021 | EPI_ISL_1710965 | 18/03/21 | North America / Mexico / Mexico City  | Human | Male   | 52 | Released     | Oropharyngeal swab |
| hCoV-19/Mexico/CMX-InDRE_F12290_S1477/2021 | EPI_ISL_1710966 | 16/03/21 | North America / Mexico / Mexico City  | Human | Female | 79 | Deceased     | Oropharyngeal swab |
| hCoV-19/Mexico/MOR-InDRE_F12315_S1478/2021 | EPI_ISL_1710967 | 23/03/21 | North America / Mexico / Morelos      | Human | Male   | 68 | Hospitalized | Oropharyngeal swab |
| hCoV-19/Mexico/GUA-InDRE_F12463_S1479/2021 | EPI_ISL_1710968 | 23/03/21 | North America / Mexico / Guanajuato   | Human | Male   | 36 | Released     | Oropharyngeal swab |
| hCoV-19/Mexico/GUA-InDRE_F12464_S1480/2021 | EPI_ISL_1710969 | 24/03/21 | North America / Mexico / Guanajuato   | Human | Female | 49 | Released     | Oropharyngeal swab |
| hCoV-19/Mexico/ZAC-InDRE_F12511_S1481/2021 | EPI_ISL_1710970 | 27/03/21 | North America / Mexico / Zacatecas    | Human | Male   | 44 | Released     | Oropharyngeal swab |
| hCoV-19/Mexico/CMX-INMEGEN-04-05-23/2021   | EPI_ISL_1711276 | 12/04/21 | North America / Mexico / Mexico City  | Human | Female | 55 | unknown      | Oropharyngeal swab |
| hCoV-19/Mexico/CMX-INMEGEN-04-05-66/2021   | EPI_ISL_1711277 | 14/04/21 | North America / Mexico / Mexico City  | Human | Female | 19 | unknown      | Oropharyngeal swab |
| hCoV-19/Mexico/CMX-INMEGEN-04-05-44/2021   | EPI_ISL_1711278 | 13/04/21 | North America / Mexico / Mexico City  | Human | Male   | 28 | unknown      | Oropharyngeal swab |
| hCoV-19/Mexico/CMX-INMEGEN-04-05-16/2021   | EPI_ISL_1711279 | 12/04/21 | North America / Mexico / Mexico City  | Human | Female | 20 | unknown      | Oropharyngeal swab |
| hCoV-19/Mexico/CMX-INMEGEN-04-05-13/2021   | EPI_ISL_1711280 | 12/04/21 | North America / Mexico / Mexico City  | Human | Female | 50 | unknown      | Oropharyngeal swab |
| hCoV-19/Mexico/CMX-INMEGEN-04-05-9/2021    | EPI_ISL_1711282 | 12/04/21 | North America / Mexico / Mexico City  | Human | Male   | 47 | unknown      | Oropharyngeal swab |
| hCoV-19/Mexico/CMX-INMEGEN-04-05-52/2021   | EPI_ISL_1711283 | 13/04/21 | North America / Mexico / Mexico City  | Human | Female | 48 | unknown      | Oropharyngeal swab |
| hCoV-19/Mexico/CMX-INMEGEN-04-05-43/2021   | EPI_ISL_1711284 | 13/04/21 | North America / Mexico / Mexico City  | Human | Male   | 41 | unknown      | Oropharyngeal swab |
| hCoV-19/Mexico/CMX-INMEGEN-04-05-21/2021   | EPI_ISL_1711285 | 12/04/21 | North America / Mexico / Mexico City  | Human | Female | 71 | unknown      | Oropharyngeal swab |
| hCoV-19/Mexico/CMX-INMEGEN-04-05-53/2021   | EPI_ISL_1711286 | 13/04/21 | North America / Mexico / Mexico City  | Human | Female | 44 | unknown      | Oropharyngeal swab |
| hCoV-19/Mexico/CMX-INMEGEN-04-05-67/2021   | EPI_ISL_1711287 | 14/04/21 | North America / Mexico / Mexico City  | Human | Male   | 40 | unknown      | Oropharyngeal swab |
| hCoV-19/Mexico/CMX-INMEGEN-04-05-27/2021   | EPI_ISL_1711288 | 12/04/21 | North America / Mexico / Mexico City  | Human | Female | 67 | unknown      | Oropharyngeal swab |
| hCoV-19/Mexico/CMX-INMEGEN-04-05-19/2021   | EPI_ISL_1711289 | 12/04/21 | North America / Mexico / Mexico City  | Human | Female | 53 | unknown      | Oropharyngeal swab |
| hCoV-19/Mexico/CMX-INMEGEN-04-05-11/2021   | EPI_ISL_1711290 | 12/04/21 | North America / Mexico / Mexico City  | Human | Male   | 22 | unknown      | Oropharyngeal swab |
| hCoV-19/Mexico/CMX-INMEGEN-04-05-38/2021   | EPI_ISL_1711291 | 12/04/21 | North America / Mexico / Mexico City  | Human | Male   | 19 | unknown      | Oropharyngeal swab |
| hCoV-19/Mexico/CMX-INMEGEN-04-05-50/2021   | EPI_ISL_1711292 | 13/04/21 | North America / Mexico / Mexico City  | Human | Female | 28 | unknown      | Oropharyngeal swab |
| hCoV-19/Mexico/CMX-INMEGEN-04-05-31/2021   | EPI_ISL_1711294 | 12/04/21 | North America / Mexico / Mexico City  | Human | Male   | 52 | unknown      | Oropharyngeal swab |
| hCoV-19/Mexico/CMX-INMEGEN-04-05-51/2021   | EPI_ISL_1711295 | 13/04/21 | North America / Mexico / Mexico City  | Human | Female | 58 | unknown      | Oropharyngeal swab |
| hCoV-19/Mexico/CMX-INMEGEN-04-05-55/2021   | EPI_ISL_1711296 | 13/04/21 | North America / Mexico / Mexico City  | Human | Male   | 61 | unknown      | Oropharyngeal swab |
| hCoV-19/Mexico/CMX-INMEGEN-04-05-40/2021   | EPI_ISL_1711303 | 12/04/21 | North America / Mexico / Mexico City  | Human | Female | 15 | unknown      | Oropharyngeal swab |
| hCoV-19/Mexico/CMX-INMEGEN-04-05-12/2021   | EPI_ISL_1711304 | 12/04/21 | North America / Mexico / Mexico City  | Human | Male   | 48 | unknown      | Oropharyngeal swab |
| hCoV-19/Mexico/CMX-INMEGEN-04-05-30/2021   | EPI_ISL_1711305 | 12/04/21 | North America / Mexico / Mexico City  | Human | Male   | 46 | unknown      | Oropharyngeal swab |
| hCoV-19/Mexico/CMX-INMEGEN-04-05-7/2021    | EPI_ISL_1711306 | 12/04/21 | North America / Mexico / Mexico City  | Human | Male   | 41 | unknown      | Oropharyngeal swab |
| hCoV-19/Mexico/CMX-INMEGEN-04-05-17/2021   | EPI_ISL_1711308 | 12/04/21 | North America / Mexico / Mexico City  | Human | Female | 20 | unknown      | Oropharyngeal swab |
| hCoV-19/Mexico/CMX-INMEGEN-04-05-15/2021   | EPI_ISL_1711310 | 12/04/21 | North America / Mexico / Mexico City  | Human | Female | 59 | unknown      | Oropharyngeal swab |
| hCoV-19/Mexico/CMX-INMEGEN-04-05-41/2021   | EPI_ISL_1711316 | 13/04/21 | North America / Mexico / Mexico City  | Human | Male   | 72 | unknown      | Oropharyngeal swab |
| hCoV-19/Mexico/CMX-INMEGEN-04-05-42/2021   | EPI_ISL_1711317 | 13/04/21 | North America / Mexico / Mexico City  | Human | Female | 58 | unknown      | Oropharyngeal swab |
| hCoV-19/Mexico/CMX-INMEGEN-04-05-1/2021    | EPI_ISL_1711318 | 09/04/21 | North America / Mexico / Mexico City  | Human | Female | 37 | unknown      | Oropharyngeal swab |
| hCoV-19/Mexico/CMX-INMEGEN-04-05-2/2021    | EPI_ISL_1711319 | 11/04/21 | North America / Mexico / Mexico City  | Human | Female | 45 | unknown      | Oropharyngeal swab |
| hCoV-19/Mexico/CMX-INMEGEN-04-05-3/2021    | EPI_ISL_1711320 | 12/04/21 | North America / Mexico / Mexico City  | Human | Male   | 59 | unknown      | Oropharyngeal swab |
| hCoV-19/Mexico/CMX-INMEGEN-04-05-4/2021    | EPI_ISL_1711321 | 12/04/21 | North America / Mexico / Mexico City  | Human | Female | 65 | unknown      | Oropharyngeal swab |
| hCoV-19/Mexico/CMX-INMEGEN-04-05-5/2021    | EPI_ISL_1711322 | 12/04/21 | North America / Mexico / Mexico City  | Human | Male   | 47 | unknown      | Oropharyngeal swab |
| hCoV-19/Mexico/CMX-INMEGEN-04-05-10/2021   | EPI_ISL_1711324 | 12/04/21 | North America / Mexico / Mexico City  | Human | Male   | 51 | unknown      | Oropharyngeal swab |
| hCoV-19/Mexico/CMX-INMEGEN-04-05-14/2021   | EPI_ISL_1711325 | 12/04/21 | North America / Mexico / Mexico City  | Human | Female | 65 | unknown      | Oropharyngeal swab |
| hCoV-19/Mexico/CMX-INMEGEN-04-05-18/2021   | EPI_ISL_1711326 | 12/04/21 | North America / Mexico / Mexico City  | Human | Female | 21 | unknown      | Oropharyngeal swab |
| hCoV-19/Mexico/CMX-INMEGEN-04-05-20/2021   | EPI_ISL_1711327 | 12/04/21 | North America / Mexico / Mexico City  | Human | Female | 56 | unknown      | Oropharyngeal swab |







|                                              |                 |          |                                          |       |        |    |              |                                       |
|----------------------------------------------|-----------------|----------|------------------------------------------|-------|--------|----|--------------|---------------------------------------|
| 2019-Mexico-CMX-INMEGEN-INDRE-04-06-183/2020 | EPI_ISL_1810916 | 16/04/21 | North America / Mexico / Mexico City     | Human | Female | 13 | Released     | Oropharyngeal swab                    |
| 2019-Mexico-CMX-INMEGEN-INDRE-04-06-184/2020 | EPI_ISL_1810917 | 16/04/21 | North America / Mexico / Mexico City     | Human | Male   | 29 | Released     | Oropharyngeal swab                    |
| 2019-Mexico-MEX-INMEGEN-INDRE-04-06-186/2020 | EPI_ISL_1810919 | 15/04/21 | North America / Mexico / State of Mexico | Human | Male   | 91 | Hospitalized | Oropharyngeal swab                    |
| 2019-Mexico-CMX-INMEGEN-INDRE-04-06-187/2020 | EPI_ISL_1810920 | 19/04/21 | North America / Mexico / Mexico City     | Human | Female | 31 | Released     | Oropharyngeal swab                    |
| 2019-Mexico-CMX-INMEGEN-INDRE-04-06-188/2020 | EPI_ISL_1810921 | 16/04/21 | North America / Mexico / Mexico City     | Human | Male   | 60 | Released     | Oropharyngeal swab                    |
| 2019-Mexico-CMX-INMEGEN-INDRE-04-06-189/2020 | EPI_ISL_1810922 | 16/04/21 | North America / Mexico / Mexico City     | Human | Female | 45 | Live         | Oropharyngeal swab                    |
| 2019-Mexico-CMX-INMEGEN-INDRE-04-06-190/2020 | EPI_ISL_1810923 | 16/04/21 | North America / Mexico / Mexico City     | Human | Female | 61 | Live         | Oropharyngeal swab                    |
| hCoV-19/Mexico/TLA_IBT_IMSS_1043/2021        | EPI_ISL_1811379 | 03/04/21 | North America / Mexico / Tlaxcala        | Human | Female | 35 | Ambulatory   | Nasopharyngeal and oropharyngeal swab |
| hCoV-19/Mexico/TLA_IBT_IMSS_1046/2021        | EPI_ISL_1811380 | 03/04/21 | North America / Mexico / Tlaxcala        | Human | Male   | 66 | Hospitalized | Nasopharyngeal and oropharyngeal swab |
| hCoV-19/Mexico/GRO_IBT_IMSS_1055/2021        | EPI_ISL_1811381 | 03/04/21 | North America / Mexico / Guerrero        | Human | Male   | 44 | Hospitalized | Nasopharyngeal and oropharyngeal swab |
| hCoV-19/Mexico/PUE_IBT_IMSS_1065/2021        | EPI_ISL_1811382 | 30/03/21 | North America / Mexico / Puebla          | Human | Female | 64 | Ambulatory   | Nasopharyngeal and oropharyngeal swab |
| hCoV-19/Mexico/PUE_IBT_IMSS_1087/2021        | EPI_ISL_1811383 | 30/03/21 | North America / Mexico / Puebla          | Human | Male   | 63 | Ambulatory   | Nasopharyngeal and oropharyngeal swab |
| hCoV-19/Mexico/PUE_IBT_IMSS_1097/2021        | EPI_ISL_1811384 | 30/03/21 | North America / Mexico / Puebla          | Human | Male   | 36 | Ambulatory   | Nasopharyngeal and oropharyngeal swab |
| hCoV-19/Mexico/PUE_IBT_IMSS_1107/2021        | EPI_ISL_1811385 | 29/03/21 | North America / Mexico / Puebla          | Human | Female | 49 | Ambulatory   | Nasopharyngeal and oropharyngeal swab |
| hCoV-19/Mexico/PUE_IBT_IMSS_1118/2021        | EPI_ISL_1811386 | 30/03/21 | North America / Mexico / Puebla          | Human | Female | 17 | Ambulatory   | Nasopharyngeal and oropharyngeal swab |
| hCoV-19/Mexico/PUE_IBT_IMSS_1129/2021        | EPI_ISL_1811387 | 30/03/21 | North America / Mexico / Puebla          | Human | Female | 41 | Ambulatory   | Nasopharyngeal and oropharyngeal swab |
| hCoV-19/Mexico/PUE_IBT_IMSS_963/2021         | EPI_ISL_1811388 | 28/03/21 | North America / Mexico / Puebla          | Human | Male   | 83 | Ambulatory   | Nasopharyngeal and oropharyngeal swab |
| hCoV-19/Mexico/PUE_IBT_IMSS_984/2021         | EPI_ISL_1811390 | 30/03/21 | North America / Mexico / Puebla          | Human | Female | 29 | Ambulatory   | Nasopharyngeal and oropharyngeal swab |
| hCoV-19/Mexico/PUE_IBT_IMSS_995/2021         | EPI_ISL_1811391 | 31/03/21 | North America / Mexico / Puebla          | Human | Male   | 58 | Ambulatory   | Oropharyngeal swab                    |
| hCoV-19/Mexico/PUE_IBT_IMSS_1004/2021        | EPI_ISL_1811392 | 28/03/21 | North America / Mexico / Puebla          | Human | Male   | 57 | Hospitalized | Nasopharyngeal and oropharyngeal swab |
| hCoV-19/Mexico/PUE_IBT_IMSS_1014/2021        | EPI_ISL_1811393 | 31/03/21 | North America / Mexico / Puebla          | Human | Male   | 26 | Ambulatory   | Oropharyngeal swab                    |
| hCoV-19/Mexico/PUE_IBT_IMSS_1024/2021        | EPI_ISL_1811394 | 01/04/21 | North America / Mexico / Puebla          | Human | Male   | 46 | Ambulatory   | Nasopharyngeal swab                   |
| hCoV-19/Mexico/PUE_IBT_IMSS_1035/2021        | EPI_ISL_1811395 | 03/04/21 | North America / Mexico / Puebla          | Human | Female | 52 | Ambulatory   | Nasopharyngeal and oropharyngeal swab |
| hCoV-19/Mexico/PUE_IBT_IMSS_1044/2021        | EPI_ISL_1811396 | 31/03/21 | North America / Mexico / Puebla          | Human | Male   | 25 | Ambulatory   | Nasopharyngeal and oropharyngeal swab |
| hCoV-19/Mexico/PUE_IBT_IMSS_1045/2021        | EPI_ISL_1811397 | 31/03/21 | North America / Mexico / Puebla          | Human | Male   | 30 | Ambulatory   | Nasopharyngeal and oropharyngeal swab |
| hCoV-19/Mexico/PUE_IBT_IMSS_1047/2021        | EPI_ISL_1811398 | 31/03/21 | North America / Mexico / Puebla          | Human | Male   | 30 | Ambulatory   | Nasopharyngeal and oropharyngeal swab |
| hCoV-19/Mexico/PUE_IBT_IMSS_1049/2021        | EPI_ISL_1811399 | 03/04/21 | North America / Mexico / Puebla          | Human | Male   | 75 | Hospitalized | Nasopharyngeal and oropharyngeal swab |
| hCoV-19/Mexico/PUE_IBT_IMSS_1050/2021        | EPI_ISL_1811400 | 04/04/21 | North America / Mexico / Puebla          | Human | Male   | 81 | Hospitalized | Nasopharyngeal and oropharyngeal swab |
| hCoV-19/Mexico/PUE_IBT_IMSS_1051/2021        | EPI_ISL_1811401 | 04/04/21 | North America / Mexico / Puebla          | Human | Female | 56 | Hospitalized | Nasopharyngeal and oropharyngeal swab |
| hCoV-19/Mexico/PUE_IBT_IMSS_1052/2021        | EPI_ISL_1811402 | 02/04/21 | North America / Mexico / Puebla          | Human | Female | 48 | Ambulatory   | Nasopharyngeal and oropharyngeal swab |
| hCoV-19/Mexico/PUE_IBT_IMSS_1054/2021        | EPI_ISL_1811403 | 31/03/21 | North America / Mexico / Puebla          | Human | Male   | 71 | Ambulatory   | Nasopharyngeal and oropharyngeal swab |
| hCoV-19/Mexico/VER_IBT_IMSS_1056/2021        | EPI_ISL_1811404 | 31/03/21 | North America / Mexico / Veracruz        | Human | Male   | 49 | Ambulatory   | Nasopharyngeal and oropharyngeal swab |
| hCoV-19/Mexico-CMX_IBT_IMSS_1058/2021        | EPI_ISL_1811405 | 30/03/21 | North America / Mexico / Mexico City     | Human | Female | 59 | Ambulatory   | Nasopharyngeal and oropharyngeal swab |
| hCoV-19/Mexico-CMX_IBT_IMSS_1059/2021        | EPI_ISL_1811406 | 05/04/21 | North America / Mexico / Mexico City     | Human | Female | 50 | Ambulatory   | Nasopharyngeal and oropharyngeal swab |
| hCoV-19/Mexico-CMX_IBT_IMSS_1060/2021        | EPI_ISL_1811407 | 05/04/21 | North America / Mexico / Mexico City     | Human | Female | 33 | Ambulatory   | Nasopharyngeal and oropharyngeal swab |
| hCoV-19/Mexico-CMX_IBT_IMSS_1061/2021        | EPI_ISL_1811408 | 05/04/21 | North America / Mexico / Mexico City     | Human | Female | 48 | Ambulatory   | Nasopharyngeal and oropharyngeal swab |
| hCoV-19/Mexico-CMX_IBT_IMSS_1062/2021        | EPI_ISL_1811409 | 05/04/21 | North America / Mexico / Mexico City     | Human | Male   | 12 | Ambulatory   | Nasopharyngeal and oropharyngeal swab |
| hCoV-19/Mexico-CMX_IBT_IMSS_1063/2021        | EPI_ISL_1811410 | 05/04/21 | North America / Mexico / Mexico City     | Human | Female | 27 | Ambulatory   | Nasopharyngeal and oropharyngeal swab |
| hCoV-19/Mexico-CMX_IBT_IMSS_1064/2021        | EPI_ISL_1811411 | 06/04/21 | North America / Mexico / Mexico City     | Human | Female | 31 | Hospitalized | Nasopharyngeal swab                   |
| hCoV-19/Mexico-MEX_IBT_IMSS_1066/2021        | EPI_ISL_1811412 | 05/04/21 | North America / Mexico / State of Mexico | Human | Male   | 64 | Hospitalized | Nasopharyngeal and oropharyngeal swab |
| hCoV-19/Mexico-AGU_IBT_IMSS_1067/2021        | EPI_ISL_1811413 | 04/04/21 | North America / Mexico / Aguascalientes  | Human | Male   | 29 | Ambulatory   | Nasopharyngeal and oropharyngeal swab |
| hCoV-19/Mexico-MEX_IBT_IMSS_1068/2021        | EPI_ISL_1811414 | 05/04/21 | North America / Mexico / State of Mexico | Human | Male   | 43 | Ambulatory   | Nasopharyngeal and oropharyngeal swab |
| hCoV-19/Mexico-MEX_IBT_IMSS_1069/2021        | EPI_ISL_1811415 | 05/04/21 | North America / Mexico / State of Mexico | Human | Female | 46 | Ambulatory   | Nasopharyngeal and oropharyngeal swab |
| hCoV-19/Mexico-MOR_IBT_IMSS_1070/2021        | EPI_ISL_1811416 | 04/04/21 | North America / Mexico / Morelos         | Human | Female | 24 | Ambulatory   | Nasopharyngeal and oropharyngeal swab |

|                                       |                 |          |                                          |       |        |    |              |                                       |
|---------------------------------------|-----------------|----------|------------------------------------------|-------|--------|----|--------------|---------------------------------------|
| hCoV-19/Mexico/VER_IBT_IMSS_1071/2021 | EPI_ISL_1811417 | 31/03/21 | North America / Mexico / Veracruz        | Human | Female | 46 | Ambulatory   | Nasopharyngeal and oropharyngeal swab |
| hCoV-19/Mexico/VER_IBT_IMSS_1072/2021 | EPI_ISL_1811418 | 05/04/21 | North America / Mexico / Veracruz        | Human | Male   | 48 | Ambulatory   | Nasopharyngeal and oropharyngeal swab |
| hCoV-19/Mexico/QUE_IBT_IMSS_1074/2021 | EPI_ISL_1811420 | 05/04/21 | North America / Mexico / Queretaro       | Human | Female | 74 | Hospitalized | Nasopharyngeal and oropharyngeal swab |
| hCoV-19/Mexico/HID_IBT_IMSS_1075/2021 | EPI_ISL_1811421 | 03/04/21 | North America / Mexico / Hidalgo         | Human | Male   | 64 | Hospitalized | Nasopharyngeal and oropharyngeal swab |
| hCoV-19/Mexico/HID_IBT_IMSS_1077/2021 | EPI_ISL_1811422 | 03/04/21 | North America / Mexico / Hidalgo         | Human | Male   | 52 | Hospitalized | Nasopharyngeal and oropharyngeal swab |
| hCoV-19/Mexico/CMX_IBT_IMSS_1078/2021 | EPI_ISL_1811423 | 06/04/21 | North America / Mexico / Mexico City     | Human | Female | 58 | Hospitalized | Oropharyngeal swab                    |
| hCoV-19/Mexico/CMX_IBT_IMSS_1079/2021 | EPI_ISL_1811424 | 06/04/21 | North America / Mexico / Mexico City     | Human | Male   | 63 | Hospitalized | Oropharyngeal swab                    |
| hCoV-19/Mexico/CMX_IBT_IMSS_1080/2021 | EPI_ISL_1811425 | 06/04/21 | North America / Mexico / Mexico City     | Human | Female | 60 | Hospitalized | Oropharyngeal swab                    |
| hCoV-19/Mexico/CMX_IBT_IMSS_1081/2021 | EPI_ISL_1811426 | 05/04/21 | North America / Mexico / Mexico City     | Human | Female | 53 | Hospitalized | Oropharyngeal swab                    |
| hCoV-19/Mexico/MEX_IBT_IMSS_1082/2021 | EPI_ISL_1811427 | 05/04/21 | North America / Mexico / State of Mexico | Human | Male   | 45 | Hospitalized | Nasopharyngeal and oropharyngeal swab |
| hCoV-19/Mexico/MEX_IBT_IMSS_1083/2021 | EPI_ISL_1811428 | 06/04/21 | North America / Mexico / State of Mexico | Human | Male   | 76 | Hospitalized | Nasopharyngeal and oropharyngeal swab |
| hCoV-19/Mexico/MEX_IBT_IMSS_1084/2021 | EPI_ISL_1811429 | 05/04/21 | North America / Mexico / State of Mexico | Human | Male   | 68 | Hospitalized | Oropharyngeal swab                    |
| hCoV-19/Mexico/MEX_IBT_IMSS_1085/2021 | EPI_ISL_1811430 | 05/04/21 | North America / Mexico / State of Mexico | Human | Female | 42 | Hospitalized | Nasopharyngeal and oropharyngeal swab |
| hCoV-19/Mexico/MEX_IBT_IMSS_1086/2021 | EPI_ISL_1811431 | 05/04/21 | North America / Mexico / State of Mexico | Human | Male   | 64 | Hospitalized | Nasopharyngeal and oropharyngeal swab |
| hCoV-19/Mexico/SLP_IBT_IMSS_1088/2021 | EPI_ISL_1811432 | 06/04/21 | North America / Mexico / San Luis Potosi | Human | Female | 24 | Ambulatory   | Nasopharyngeal and oropharyngeal swab |
| hCoV-19/Mexico/SLP_IBT_IMSS_1090/2021 | EPI_ISL_1811434 | 04/04/21 | North America / Mexico / San Luis Potosi | Human | Male   | 33 | Hospitalized | Nasopharyngeal and oropharyngeal swab |
| hCoV-19/Mexico/PUE_IBT_IMSS_1091/2021 | EPI_ISL_1811435 | 02/04/21 | North America / Mexico / Puebla          | Human | Female | 32 | Ambulatory   | Oropharyngeal swab                    |
| hCoV-19/Mexico/PUE_IBT_IMSS_1092/2021 | EPI_ISL_1811436 | 02/04/21 | North America / Mexico / Puebla          | Human | Female | 40 | Ambulatory   | Oropharyngeal swab                    |
| hCoV-19/Mexico/PUE_IBT_IMSS_1093/2021 | EPI_ISL_1811437 | 04/04/21 | North America / Mexico / Puebla          | Human | Female | 31 | Ambulatory   | Oropharyngeal swab                    |
| hCoV-19/Mexico/PUE_IBT_IMSS_1094/2021 | EPI_ISL_1811438 | 04/04/21 | North America / Mexico / Puebla          | Human | Male   | 53 | Ambulatory   | Oropharyngeal swab                    |
| hCoV-19/Mexico/PUE_IBT_IMSS_1095/2021 | EPI_ISL_1811439 | 04/04/21 | North America / Mexico / Puebla          | Human | Female | 68 | Hospitalized | Nasopharyngeal and oropharyngeal swab |
| hCoV-19/Mexico/PUE_IBT_IMSS_1096/2021 | EPI_ISL_1811440 | 01/04/21 | North America / Mexico / Puebla          | Human | Female | 40 | Ambulatory   | Oropharyngeal swab                    |
| hCoV-19/Mexico/PUE_IBT_IMSS_1098/2021 | EPI_ISL_1811441 | 03/04/21 | North America / Mexico / Puebla          | Human | Female | 76 | Ambulatory   | Oropharyngeal swab                    |
| hCoV-19/Mexico/PUE_IBT_IMSS_1099/2021 | EPI_ISL_1811442 | 03/04/21 | North America / Mexico / Puebla          | Human | Female | 41 | Ambulatory   | Oropharyngeal swab                    |
| hCoV-19/Mexico/PUE_IBT_IMSS_1100/2021 | EPI_ISL_1811443 | 03/04/21 | North America / Mexico / Puebla          | Human | Male   | 45 | Ambulatory   | Oropharyngeal swab                    |
| hCoV-19/Mexico/PUE_IBT_IMSS_1101/2021 | EPI_ISL_1811444 | 02/04/21 | North America / Mexico / Puebla          | Human | Male   | 62 | Hospitalized | Oropharyngeal swab                    |
| hCoV-19/Mexico/PUE_IBT_IMSS_1102/2021 | EPI_ISL_1811445 | 04/04/21 | North America / Mexico / Puebla          | Human | Male   | 32 | Ambulatory   | Nasopharyngeal swab                   |
| hCoV-19/Mexico/PUE_IBT_IMSS_1103/2021 | EPI_ISL_1811446 | 05/04/21 | North America / Mexico / Puebla          | Human | Female | 46 | Ambulatory   | Nasopharyngeal and oropharyngeal swab |
| hCoV-19/Mexico/PUE_IBT_IMSS_1104/2021 | EPI_ISL_1811447 | 05/04/21 | North America / Mexico / Puebla          | Human | Male   | 21 | Ambulatory   | Nasopharyngeal and oropharyngeal swab |
| hCoV-19/Mexico/PUE_IBT_IMSS_1105/2021 | EPI_ISL_1811448 | 05/04/21 | North America / Mexico / Puebla          | Human | Male   | 37 | Ambulatory   | Nasopharyngeal and oropharyngeal swab |
| hCoV-19/Mexico/CMX_IBT_IMSS_1108/2021 | EPI_ISL_1811450 | 05/04/21 | North America / Mexico / Mexico City     | Human | Female | 34 | Ambulatory   | Nasopharyngeal and oropharyngeal swab |
| hCoV-19/Mexico/CMX_IBT_IMSS_1109/2021 | EPI_ISL_1811451 | 06/04/21 | North America / Mexico / Mexico City     | Human | Male   | 42 | Ambulatory   | Nasopharyngeal and oropharyngeal swab |
| hCoV-19/Mexico/CMX_IBT_IMSS_1110/2021 | EPI_ISL_1811452 | 06/04/21 | North America / Mexico / Mexico City     | Human | Male   | 37 | Ambulatory   | Nasopharyngeal and oropharyngeal swab |
| hCoV-19/Mexico/MEX_IBT_IMSS_1111/2021 | EPI_ISL_1811453 | 06/04/21 | North America / Mexico / State of Mexico | Human | Male   | 44 | Hospitalized | Nasopharyngeal and oropharyngeal swab |
| hCoV-19/Mexico/VER_IBT_IMSS_1113/2021 | EPI_ISL_1811455 | 05/04/21 | North America / Mexico / Veracruz        | Human | Male   | 77 | Hospitalized | Nasopharyngeal and oropharyngeal swab |
| hCoV-19/Mexico/VER_IBT_IMSS_1114/2021 | EPI_ISL_1811456 | 05/04/21 | North America / Mexico / Veracruz        | Human | Male   | 77 | Hospitalized | Nasopharyngeal and oropharyngeal swab |
| hCoV-19/Mexico/CMX_IBT_IMSS_1115/2021 | EPI_ISL_1811457 | 07/04/21 | North America / Mexico / Mexico City     | Human | Male   | 31 | Ambulatory   | Nasopharyngeal and oropharyngeal swab |
| hCoV-19/Mexico/MEX_IBT_IMSS_1117/2021 | EPI_ISL_1811459 | 06/04/21 | North America / Mexico / State of Mexico | Human | Male   | 36 | Hospitalized | Nasopharyngeal swab                   |
| hCoV-19/Mexico/VER_IBT_IMSS_1121/2021 | EPI_ISL_1811461 | 04/04/21 | North America / Mexico / Veracruz        | Human | Female | 59 | Ambulatory   | Nasopharyngeal and oropharyngeal swab |
| hCoV-19/Mexico/VER_IBT_IMSS_1122/2021 | EPI_ISL_1811462 | 05/04/21 | North America / Mexico / Veracruz        | Human | Male   | 39 | Hospitalized | Nasopharyngeal and oropharyngeal swab |
| hCoV-19/Mexico/VER_IBT_IMSS_1123/2021 | EPI_ISL_1811463 | 05/04/21 | North America / Mexico / Veracruz        | Human | Female | 55 | Ambulatory   | Nasopharyngeal and oropharyngeal swab |
| hCoV-19/Mexico/AGU_IBT_IMSS_1124/2021 | EPI_ISL_1811464 | 06/04/21 | North America / Mexico / Aguascalientes  | Human | Male   | 55 | Ambulatory   | Nasopharyngeal and oropharyngeal swab |
| hCoV-19/Mexico/AGU_IBT_IMSS_1126/2021 | EPI_ISL_1811466 | 05/04/21 | North America / Mexico / Aguascalientes  | Human | Female | 44 | Ambulatory   | Nasopharyngeal and oropharyngeal swab |
| hCoV-19/Mexico/QUE_IBT_IMSS_1127/2021 | EPI_ISL_1811467 | 02/04/21 | North America / Mexico / Queretaro       | Human | Male   | 57 | Hospitalized | Nasopharyngeal and oropharyngeal swab |



|                                       |                 |          |                                          |       |        |    |              |                                       |
|---------------------------------------|-----------------|----------|------------------------------------------|-------|--------|----|--------------|---------------------------------------|
| hCoV-19/Mexico/MEX_IBT_IMSS_1128/2021 | EPI_ISL_1811468 | 07/04/21 | North America / Mexico / State of Mexico | Human | Male   | 51 | Hospitalized | Nasopharyngeal and oropharyngeal swab |
| hCoV-19/Mexico/MEX_IBT_IMSS_954/2021  | EPI_ISL_1811469 | 06/04/21 | North America / Mexico / State of Mexico | Human | Female | 63 | Hospitalized | Oropharyngeal swab                    |
| hCoV-19/Mexico/CMX_IBT_IMSS_955/2021  | EPI_ISL_1811470 | 06/04/21 | North America / Mexico / Mexico City     | Human | Female | 83 | Hospitalized | Oropharyngeal swab                    |
| hCoV-19/Mexico/HID_IBT_IMSS_956/2021  | EPI_ISL_1811471 | 06/04/21 | North America / Mexico / Hidalgo         | Human | Male   | 48 | Hospitalized | Oropharyngeal swab                    |
| hCoV-19/Mexico/HID_IBT_IMSS_957/2021  | EPI_ISL_1811472 | 06/04/21 | North America / Mexico / Hidalgo         | Human | Male   | 47 | Hospitalized | Nasopharyngeal and oropharyngeal swab |
| hCoV-19/Mexico/HID_IBT_IMSS_958/2021  | EPI_ISL_1811473 | 06/04/21 | North America / Mexico / Hidalgo         | Human | Female | 55 | Hospitalized | Nasopharyngeal and oropharyngeal swab |
| hCoV-19/Mexico/HID_IBT_IMSS_959/2021  | EPI_ISL_1811474 | 06/04/21 | North America / Mexico / Hidalgo         | Human | Male   | 69 | Hospitalized | Nasopharyngeal and oropharyngeal swab |
| hCoV-19/Mexico/SLP_IBT_IMSS_960/2021  | EPI_ISL_1811475 | 04/04/21 | North America / Mexico / San Luis Potosi | Human | Male   | 46 | Hospitalized | Nasopharyngeal and oropharyngeal swab |
| hCoV-19/Mexico/MEX_IBT_IMSS_961/2021  | EPI_ISL_1811476 | 06/04/21 | North America / Mexico / State of Mexico | Human | Male   | 61 | Hospitalized | Oropharyngeal swab                    |
| hCoV-19/Mexico/TLA_IBT_IMSS_964/2021  | EPI_ISL_1811478 | 07/04/21 | North America / Mexico / Tlaxcala        | Human | Female | 79 | Hospitalized | Nasopharyngeal and oropharyngeal swab |
| hCoV-19/Mexico/TLA_IBT_IMSS_965/2021  | EPI_ISL_1811479 | 06/04/21 | North America / Mexico / Tlaxcala        | Human | Male   | 39 | Hospitalized | Nasopharyngeal and oropharyngeal swab |
| hCoV-19/Mexico/TLA_IBT_IMSS_966/2021  | EPI_ISL_1811480 | 05/04/21 | North America / Mexico / Tlaxcala        | Human | Female | 57 | Hospitalized | Nasopharyngeal and oropharyngeal swab |
| hCoV-19/Mexico/PUE_IBT_IMSS_967/2021  | EPI_ISL_1811481 | 05/04/21 | North America / Mexico / Puebla          | Human | Male   | 61 | Hospitalized | Nasopharyngeal and oropharyngeal swab |
| hCoV-19/Mexico/PUE_IBT_IMSS_968/2021  | EPI_ISL_1811482 | 05/04/21 | North America / Mexico / Puebla          | Human | Male   | 75 | Hospitalized | Nasopharyngeal and oropharyngeal swab |
| hCoV-19/Mexico/PUE_IBT_IMSS_969/2021  | EPI_ISL_1811483 | 05/04/21 | North America / Mexico / Puebla          | Human | Male   | 61 | Hospitalized | Nasopharyngeal and oropharyngeal swab |
| hCoV-19/Mexico/PUE_IBT_IMSS_970/2021  | EPI_ISL_1811484 | 05/04/21 | North America / Mexico / Puebla          | Human | Female | 47 | Hospitalized | Nasopharyngeal and oropharyngeal swab |
| hCoV-19/Mexico/PUE_IBT_IMSS_971/2021  | EPI_ISL_1811485 | 05/04/21 | North America / Mexico / Puebla          | Human | Male   | 39 | Hospitalized | Nasopharyngeal and oropharyngeal swab |
| hCoV-19/Mexico/PUE_IBT_IMSS_972/2021  | EPI_ISL_1811486 | 06/04/21 | North America / Mexico / Puebla          | Human | Male   | 23 | Ambulatory   | Nasopharyngeal and oropharyngeal swab |
| hCoV-19/Mexico/PUE_IBT_IMSS_974/2021  | EPI_ISL_1811487 | 05/04/21 | North America / Mexico / Puebla          | Human | Male   | 39 | Ambulatory   | Nasopharyngeal and oropharyngeal swab |
| hCoV-19/Mexico/PUE_IBT_IMSS_975/2021  | EPI_ISL_1811488 | 05/04/21 | North America / Mexico / Puebla          | Human | Male   | 74 | Ambulatory   | Nasopharyngeal and oropharyngeal swab |
| hCoV-19/Mexico/PUE_IBT_IMSS_976/2021  | EPI_ISL_1811489 | 05/04/21 | North America / Mexico / Puebla          | Human | Male   | 25 | Ambulatory   | Oropharyngeal swab                    |
| hCoV-19/Mexico/PUE_IBT_IMSS_977/2021  | EPI_ISL_1811490 | 04/04/21 | North America / Mexico / Puebla          | Human | Male   | 52 | Hospitalized | Nasopharyngeal and oropharyngeal swab |
| hCoV-19/Mexico/PUE_IBT_IMSS_978/2021  | EPI_ISL_1811491 | 04/04/21 | North America / Mexico / Puebla          | Human | Female | 36 | Hospitalized | Nasopharyngeal and oropharyngeal swab |
| hCoV-19/Mexico/PUE_IBT_IMSS_980/2021  | EPI_ISL_1811493 | 30/03/21 | North America / Mexico / Puebla          | Human | Female | 58 | Hospitalized | Nasopharyngeal and oropharyngeal swab |
| hCoV-19/Mexico/PUE_IBT_IMSS_981/2021  | EPI_ISL_1811494 | 03/04/21 | North America / Mexico / Puebla          | Human | Male   | 23 | Hospitalized | Nasopharyngeal and oropharyngeal swab |
| hCoV-19/Mexico/PUE_IBT_IMSS_982/2021  | EPI_ISL_1811495 | 29/03/21 | North America / Mexico / Puebla          | Human | Male   | 56 | Hospitalized | Nasopharyngeal and oropharyngeal swab |
| hCoV-19/Mexico/PUE_IBT_IMSS_983/2021  | EPI_ISL_1811496 | 05/04/21 | North America / Mexico / Puebla          | Human | Male   | 37 | Ambulatory   | Oropharyngeal swab                    |
| hCoV-19/Mexico/PUE_IBT_IMSS_985/2021  | EPI_ISL_1811497 | 04/04/21 | North America / Mexico / Puebla          | Human | Male   | 35 | Ambulatory   | Oropharyngeal swab                    |
| hCoV-19/Mexico/PUE_IBT_IMSS_986/2021  | EPI_ISL_1811498 | 05/04/21 | North America / Mexico / Puebla          | Human | Male   | 58 | Ambulatory   | Oropharyngeal swab                    |
| hCoV-19/Mexico/PUE_IBT_IMSS_987/2021  | EPI_ISL_1811499 | 06/04/21 | North America / Mexico / Puebla          | Human | Male   | 48 | Hospitalized | Nasopharyngeal and oropharyngeal swab |
| hCoV-19/Mexico/CMX_IBT_IMSS_989/2021  | EPI_ISL_1811501 | 07/04/21 | North America / Mexico / Mexico City     | Human | Female | 80 | Hospitalized | Nasopharyngeal swab                   |
| hCoV-19/Mexico/CMX_IBT_IMSS_990/2021  | EPI_ISL_1811502 | 07/04/21 | North America / Mexico / Mexico City     | Human | Male   | 54 | Hospitalized | Oropharyngeal swab                    |
| hCoV-19/Mexico/CMX_IBT_IMSS_991/2021  | EPI_ISL_1811503 | 07/04/21 | North America / Mexico / Mexico City     | Human | Female | 65 | Hospitalized | Nasopharyngeal swab                   |
| hCoV-19/Mexico/CMX_IBT_IMSS_993/2021  | EPI_ISL_1811505 | 07/04/21 | North America / Mexico / Mexico City     | Human | Male   | 45 | Hospitalized | Nasopharyngeal and oropharyngeal swab |
| hCoV-19/Mexico/CMX_IBT_IMSS_994/2021  | EPI_ISL_1811506 | 08/04/21 | North America / Mexico / Mexico City     | Human | Female | 55 | Ambulatory   | Nasopharyngeal and oropharyngeal swab |
| hCoV-19/Mexico/MEX_IBT_IMSS_996/2021  | EPI_ISL_1811507 | 09/04/21 | North America / Mexico / State of Mexico | Human | Female | 26 | Ambulatory   | Nasopharyngeal and oropharyngeal swab |
| hCoV-19/Mexico/MEX_IBT_IMSS_997/2021  | EPI_ISL_1811508 | 04/04/21 | North America / Mexico / State of Mexico | Human | Male   | 68 | Hospitalized | Nasopharyngeal and oropharyngeal swab |
| hCoV-19/Mexico/JAL_IBT_IMSS_998/2021  | EPI_ISL_1811509 | 08/04/21 | North America / Mexico / Jalisco         | Human | Male   | 73 | Hospitalized | Nasopharyngeal and oropharyngeal swab |
| hCoV-19/Mexico/MEX_IBT_IMSS_999/2021  | EPI_ISL_1811510 | 08/04/21 | North America / Mexico / State of Mexico | Human | Female | 57 | Hospitalized | Nasopharyngeal and oropharyngeal swab |
| hCoV-19/Mexico/CMX_IBT_IMSS_1002/2021 | EPI_ISL_1811511 | 09/04/21 | North America / Mexico / Mexico City     | Human | Female | 50 | Ambulatory   | Oropharyngeal swab                    |
| hCoV-19/Mexico/MEX_IBT_IMSS_1003/2021 | EPI_ISL_1811512 | 09/04/21 | North America / Mexico / State of Mexico | Human | Female | 49 | Ambulatory   | Nasopharyngeal and oropharyngeal swab |
| hCoV-19/Mexico/MEX_IBT_IMSS_1005/2021 | EPI_ISL_1811513 | 07/04/21 | North America / Mexico / State of Mexico | Human | Female | 78 | Hospitalized | Nasopharyngeal and oropharyngeal swab |
| hCoV-19/Mexico/MEX_IBT_IMSS_1006/2021 | EPI_ISL_1811514 | 06/04/21 | North America / Mexico / State of Mexico | Human | Female | 46 | Ambulatory   | Nasopharyngeal and oropharyngeal swab |
| hCoV-19/Mexico/MEX_IBT_IMSS_1007/2021 | EPI_ISL_1811515 | 08/04/21 | North America / Mexico / State of Mexico | Human | Female | 63 | Hospitalized | Nasopharyngeal and oropharyngeal swab |

|                                             |                 |          |                                              |       |        |    |              |                                       |
|---------------------------------------------|-----------------|----------|----------------------------------------------|-------|--------|----|--------------|---------------------------------------|
| hCoV-19/Mexico/MEX_IBT_IMSS_1008/2021       | EPI_ISL_1811516 | 08/04/21 | North America / Mexico / State of Mexico     | Human | Male   | 64 | Hospitalized | Nasopharyngeal and oropharyngeal swab |
| hCoV-19/Mexico/CMX_IBT_IMSS_1009/2021       | EPI_ISL_1811517 | 09/04/21 | North America / Mexico / Mexico City         | Human | Male   | 37 | Ambulatory   | Oropharyngeal swab                    |
| hCoV-19/Mexico/VER_IBT_IMSS_1013/2021       | EPI_ISL_1811520 | 05/04/21 | North America / Mexico / Veracruz            | Human | Male   | 42 | Ambulatory   | Nasopharyngeal and oropharyngeal swab |
| hCoV-19/Mexico/MEX_IBT_IMSS_1016/2021       | EPI_ISL_1811522 | 11/04/21 | North America / Mexico / State of Mexico     | Human | Female | 67 | Hospitalized | Nasopharyngeal and oropharyngeal swab |
| hCoV-19/Mexico/GRO_IBT_IMSS_1017/2021       | EPI_ISL_1811523 | 09/04/21 | North America / Mexico / Guerrero            | Human | Female | 68 | Hospitalized | Nasopharyngeal and oropharyngeal swab |
| hCoV-19/Mexico/BCS_IBT_IMSS_1018/2021       | EPI_ISL_1811524 | 09/04/21 | North America / Mexico / Baja California Sur | Human | Male   | 45 | Ambulatory   | Nasopharyngeal and oropharyngeal swab |
| hCoV-19/Mexico/CMX_IBT_IMSS_1019/2021       | EPI_ISL_1811525 | 10/04/21 | North America / Mexico / Mexico City         | Human | Male   | 76 | Hospitalized | Nasopharyngeal swab                   |
| hCoV-19/Mexico/CMX_IBT_IMSS_1020/2021       | EPI_ISL_1811526 | 10/04/21 | North America / Mexico / Mexico City         | Human | Female | 56 | Hospitalized | Nasopharyngeal swab                   |
| hCoV-19/Mexico/MEX_IBT_IMSS_1021/2021       | EPI_ISL_1811527 | 10/04/21 | North America / Mexico / State of Mexico     | Human | Male   | 64 | Hospitalized | Nasopharyngeal and oropharyngeal swab |
| hCoV-19/Mexico/TLA_IBT_IMSS_1022/2021       | EPI_ISL_1811528 | 08/04/21 | North America / Mexico / Tlaxcala            | Human | Male   | 77 | Hospitalized | Nasopharyngeal and oropharyngeal swab |
| hCoV-19/Mexico/TLA_IBT_IMSS_1023/2021       | EPI_ISL_1811529 | 11/04/21 | North America / Mexico / Tlaxcala            | Human | Female | 90 | Hospitalized | Nasopharyngeal and oropharyngeal swab |
| hCoV-19/Mexico/TLA_IBT_IMSS_1025/2021       | EPI_ISL_1811530 | 11/04/21 | North America / Mexico / Tlaxcala            | Human | Male   | 48 | Hospitalized | Nasopharyngeal and oropharyngeal swab |
| hCoV-19/Mexico/BCS_IBT_IMSS_1026/2021       | EPI_ISL_1811531 | 10/04/21 | North America / Mexico / Baja California Sur | Human | Male   | 32 | Ambulatory   | Nasopharyngeal and oropharyngeal swab |
| hCoV-19/Mexico/PUE_IBT_IMSS_1027/2021       | EPI_ISL_1811532 | 10/04/21 | North America / Mexico / Puebla              | Human | Female | 92 | Hospitalized | Nasopharyngeal and oropharyngeal swab |
| hCoV-19/Mexico/PUE_IBT_IMSS_1028/2021       | EPI_ISL_1811533 | 10/04/21 | North America / Mexico / Puebla              | Human | Male   | 94 | Hospitalized | Nasopharyngeal and oropharyngeal swab |
| hCoV-19/Mexico/PUE_IBT_IMSS_1029/2021       | EPI_ISL_1811534 | 10/04/21 | North America / Mexico / Puebla              | Human | Male   | 82 | Hospitalized | Nasopharyngeal and oropharyngeal swab |
| hCoV-19/Mexico/PUE_IBT_IMSS_1030/2021       | EPI_ISL_1811535 | 09/04/21 | North America / Mexico / Puebla              | Human | Female | 63 | Hospitalized | Nasopharyngeal and oropharyngeal swab |
| hCoV-19/Mexico/PUE_IBT_IMSS_1031/2021       | EPI_ISL_1811536 | 09/04/21 | North America / Mexico / Puebla              | Human | Male   | 49 | Ambulatory   | Oropharyngeal swab                    |
| hCoV-19/Mexico/PUE_IBT_IMSS_1032/2021       | EPI_ISL_1811537 | 08/04/21 | North America / Mexico / Puebla              | Human | Female | 92 | Ambulatory   | Oropharyngeal swab                    |
| hCoV-19/Mexico/PUE_IBT_IMSS_1033/2021       | EPI_ISL_1811538 | 09/04/21 | North America / Mexico / Puebla              | Human | Female | 34 | Ambulatory   | Oropharyngeal swab                    |
| hCoV-19/Mexico/PUE_IBT_IMSS_1034/2021       | EPI_ISL_1811539 | 31/03/21 | North America / Mexico / Puebla              | Human | Female | 42 | Ambulatory   | Nasopharyngeal and oropharyngeal swab |
| hCoV-19/Mexico/PUE_IBT_IMSS_1036/2021       | EPI_ISL_1811540 | 05/04/21 | North America / Mexico / Puebla              | Human | Female | 59 | Hospitalized | Nasopharyngeal and oropharyngeal swab |
| hCoV-19/Mexico/PUE_IBT_IMSS_1037/2021       | EPI_ISL_1811541 | 05/04/21 | North America / Mexico / Puebla              | Human | Female | 45 | Ambulatory   | Nasopharyngeal and oropharyngeal swab |
| hCoV-19/Mexico/PUE_IBT_IMSS_1038/2021       | EPI_ISL_1811542 | 07/04/21 | North America / Mexico / Puebla              | Human | Female | 37 | Ambulatory   | Nasopharyngeal and oropharyngeal swab |
| hCoV-19/Mexico/PUE_IBT_IMSS_1040/2021       | EPI_ISL_1811543 | 09/04/21 | North America / Mexico / Puebla              | Human | Male   | 51 | Ambulatory   | Nasopharyngeal and oropharyngeal swab |
| hCoV-19/Mexico/PUE_IBT_IMSS_1041/2021       | EPI_ISL_1811544 | 09/04/21 | North America / Mexico / Puebla              | Human | Male   | 39 | Ambulatory   | Nasopharyngeal and oropharyngeal swab |
| hCoV-19/Mexico/CMX_IBT_IMSS_1042/2021       | EPI_ISL_1811545 | 12/04/21 | North America / Mexico / Mexico City         | Human | Female | 41 | Ambulatory   | Nasopharyngeal and oropharyngeal swab |
| 1CoV-19/Mexico/QUE-InDRE_FB12853_S1527/2021 | EPI_ISL_1821102 | 02/04/21 | North America / Mexico / Queretaro           | Human | Female | 27 | Hospitalized | Oropharyngeal swab                    |
| 1CoV-19/Mexico/CHH-InDRE_FB12873_S1528/2021 | EPI_ISL_1821103 | 03/04/21 | North America / Mexico / Chihuahua           | Human | Male   | 26 | Released     | Oropharyngeal swab                    |
| 1CoV-19/Mexico/BCS-InDRE_FB12883_S1529/2021 | EPI_ISL_1821104 | 03/04/21 | North America / Mexico / Baja California Sur | Human | Male   | 27 | Released     | Oropharyngeal swab                    |
| 1CoV-19/Mexico/BCS-InDRE_FB12888_S1530/2021 | EPI_ISL_1821105 | 03/04/21 | North America / Mexico / Baja California Sur | Human | Female | 76 | Released     | Oropharyngeal swab                    |
| 1CoV-19/Mexico/CMX-InDRE_FB12939_S1531/2021 | EPI_ISL_1821106 | 01/04/21 | North America / Mexico / Mexico City         | Human | Female | 30 | Released     | Oropharyngeal swab                    |
| 1CoV-19/Mexico/COL-InDRE_FB12960_S1532/2021 | EPI_ISL_1821107 | 01/04/21 | North America / Mexico / Colima              | Human | Male   | 68 | Hospitalized | Oropharyngeal swab                    |
| 1CoV-19/Mexico/GUA-InDRE_FB13062_S1533/2021 | EPI_ISL_1821108 | 05/04/21 | North America / Mexico / Guanajuato          | Human | Male   | 63 | Deceased     | Oropharyngeal swab                    |
| 1CoV-19/Mexico/GUA-InDRE_FB13064_S1534/2021 | EPI_ISL_1821109 | 07/04/21 | North America / Mexico / Guanajuato          | Human | Female | 72 | Hospitalized | Oropharyngeal swab                    |
| 1CoV-19/Mexico/GUA-InDRE_FB13072_S1535/2021 | EPI_ISL_1821110 | 07/04/21 | North America / Mexico / Guanajuato          | Human | Male   | 20 | Released     | Oropharyngeal swab                    |
| 1CoV-19/Mexico/GUA-InDRE_FB13074_S1536/2021 | EPI_ISL_1821111 | 09/04/21 | North America / Mexico / Guanajuato          | Human | Male   | 51 | Released     | Oropharyngeal swab                    |
| 1CoV-19/Mexico/NLE-InDRE_FB13079_S1537/2021 | EPI_ISL_1821112 | 06/04/21 | North America / Mexico / Nuevo Leon          | Human | Female | 53 | Hospitalized | Oropharyngeal swab                    |
| 1CoV-19/Mexico/NLE-InDRE_FB13081_S1539/2021 | EPI_ISL_1821113 | 06/04/21 | North America / Mexico / Nuevo Leon          | Human | Male   | 71 | Hospitalized | Oropharyngeal swab                    |
| 1CoV-19/Mexico/NLE-InDRE_FB13084_S1540/2021 | EPI_ISL_1821114 | 05/04/21 | North America / Mexico / Nuevo Leon          | Human | Male   | 31 | Released     | Oropharyngeal swab                    |
| 1CoV-19/Mexico/NLE-InDRE_FB13085_S1541/2021 | EPI_ISL_1821115 | 05/04/21 | North America / Mexico / Nuevo Leon          | Human | Male   | 46 | Released     | Oropharyngeal swab                    |
| 1CoV-19/Mexico/NLE-InDRE_FB13086_S1542/2021 | EPI_ISL_1821116 | 06/04/21 | North America / Mexico / Nuevo Leon          | Human | Female | 35 | Released     | Oropharyngeal swab                    |
| 1CoV-19/Mexico/NLE-InDRE_FB13090_S1543/2021 | EPI_ISL_1821117 | 07/04/21 | North America / Mexico / Nuevo Leon          | Human | Female | 58 | Released     | Oropharyngeal swab                    |
| 1CoV-19/Mexico/NLE-InDRE_FB13091_S1544/2021 | EPI_ISL_1821118 | 07/04/21 | North America / Mexico / Nuevo Leon          | Human | Male   | 61 | Released     | Oropharyngeal swab                    |

|                                                            |          |                                     |       |        |    |              |                    |
|------------------------------------------------------------|----------|-------------------------------------|-------|--------|----|--------------|--------------------|
| 1CoV-19/Mexico/PUE-IndRE_FB13093_S1546/2021EPI_ISL_1821119 | 08/04/21 | North America / Mexico / Puebla     | Human | Male   | 56 | Released     | Oropharyngeal swab |
| 1CoV-19/Mexico/PUE-IndRE_FB13096_S1547/2021EPI_ISL_1821120 | 08/04/21 | North America / Mexico / Puebla     | Human | Female | 45 | Live         | Oropharyngeal swab |
| 1CoV-19/Mexico/PUE-IndRE_FB13098_S1548/2021EPI_ISL_1821121 | 08/04/21 | North America / Mexico / Puebla     | Human | Male   | 31 | Hospitalized | Oropharyngeal swab |
| 1CoV-19/Mexico/PUE-IndRE_FB13099_S1549/2021EPI_ISL_1821122 | 09/04/21 | North America / Mexico / Puebla     | Human | Female | 98 | Deceased     | Oropharyngeal swab |
| 1CoV-19/Mexico/GRO-IndRE_FB13100_S1550/2021EPI_ISL_1821123 | 09/04/21 | North America / Mexico / Guerrero   | Human | Male   | 77 | Hospitalized | Oropharyngeal swab |
| 1CoV-19/Mexico/PUE-IndRE_FB13101_S1551/2021EPI_ISL_1821124 | 10/04/21 | North America / Mexico / Puebla     | Human | Female | 60 | Deceased     | Oropharyngeal swab |
| 1CoV-19/Mexico/CHH-IndRE_FB13108_S1552/2021EPI_ISL_1821125 | 05/04/21 | North America / Mexico / Chihuahua  | Human | Male   | 38 | Live         | Oropharyngeal swab |
| 1CoV-19/Mexico/SON-IndRE_FB13110_S1553/2021EPI_ISL_1821126 | 08/04/21 | North America / Mexico / Sonora     | Human | Male   | 59 | Hospitalized | Oropharyngeal swab |
| 1CoV-19/Mexico/CHH-IndRE_FB13112_S1554/2021EPI_ISL_1821127 | 05/04/21 | North America / Mexico / Chihuahua  | Human | Male   | 18 | Released     | Oropharyngeal swab |
| 1CoV-19/Mexico/SON-IndRE_FB13113_S1555/2021EPI_ISL_1821128 | 08/04/21 | North America / Mexico / Sonora     | Human | Female | 40 | Released     | Oropharyngeal swab |
| hCoV-19/Mexico/JAL-IndRE_FB13120_S1556/2021EPI_ISL_1821129 | 08/04/21 | North America / Mexico / Jalisco    | Human | Male   | 20 | Released     | Oropharyngeal swab |
| hCoV-19/Mexico/JAL-IndRE_FB13121_S1557/2021EPI_ISL_1821130 | 08/04/21 | North America / Mexico / Jalisco    | Human | Male   | 83 | Hospitalized | Oropharyngeal swab |
| hCoV-19/Mexico/JAL-IndRE_FB13122_S1558/2021EPI_ISL_1821131 | 11/04/21 | North America / Mexico / Jalisco    | Human | Female | 46 | Released     | Oropharyngeal swab |
| 1CoV-19/Mexico/QUE-IndRE_FB13125_S1559/2021EPI_ISL_1821132 | 06/04/21 | North America / Mexico / Queretaro  | Human | Female | 42 | Released     | Oropharyngeal swab |
| 1CoV-19/Mexico/QUE-IndRE_FB13127_S1560/2021EPI_ISL_1821133 | 06/04/21 | North America / Mexico / Queretaro  | Human | Male   | 73 | Deceased     | Oropharyngeal swab |
| 1CoV-19/Mexico/QUE-IndRE_FB13128_S1561/2021EPI_ISL_1821134 | 06/04/21 | North America / Mexico / Queretaro  | Human | Female | 59 | Hospitalized | Oropharyngeal swab |
| 1CoV-19/Mexico/QUE-IndRE_FB13137_S1563/2021EPI_ISL_1821135 | 11/04/21 | North America / Mexico / Queretaro  | Human | Male   | 58 | Hospitalized | Oropharyngeal swab |
| 1CoV-19/Mexico/QUE-IndRE_FB13141_S1564/2021EPI_ISL_1821136 | 09/04/21 | North America / Mexico / Queretaro  | Human | Female | 57 | Released     | Oropharyngeal swab |
| 1CoV-19/Mexico/MOR-IndRE_FB13150_S1565/2021EPI_ISL_1821137 | 04/04/21 | North America / Mexico / Morelos    | Human | Male   | 56 | Hospitalized | Oropharyngeal swab |
| 1CoV-19/Mexico/MOR-IndRE_FB13156_S1566/2021EPI_ISL_1821138 | 05/04/21 | North America / Mexico / Morelos    | Human | Male   | 79 | Hospitalized | Oropharyngeal swab |
| 1CoV-19/Mexico/MOR-IndRE_FB13158_S1567/2021EPI_ISL_1821139 | 05/04/21 | North America / Mexico / Morelos    | Human | Male   | 63 | Hospitalized | Oropharyngeal swab |
| 1CoV-19/Mexico/MOR-IndRE_FB13160_S1568/2021EPI_ISL_1821140 | 06/04/21 | North America / Mexico / Morelos    | Human | Female | 71 | Hospitalized | Oropharyngeal swab |
| 1CoV-19/Mexico/MOR-IndRE_FB13161_S1569/2021EPI_ISL_1821141 | 06/04/21 | North America / Mexico / Morelos    | Human | Female | 63 | Hospitalized | Oropharyngeal swab |
| 1CoV-19/Mexico/MOR-IndRE_FB13162_S1570/2021EPI_ISL_1821142 | 06/04/21 | North America / Mexico / Morelos    | Human | Male   | 27 | Hospitalized | Oropharyngeal swab |
| 1CoV-19/Mexico/MOR-IndRE_FB13164_S1571/2021EPI_ISL_1821143 | 07/04/21 | North America / Mexico / Morelos    | Human | Female | 60 | Hospitalized | Oropharyngeal swab |
| 1CoV-19/Mexico/MOR-IndRE_FB13165_S1572/2021EPI_ISL_1821144 | 07/04/21 | North America / Mexico / Morelos    | Human | Female | 78 | Hospitalized | Oropharyngeal swab |
| 1CoV-19/Mexico/MOR-IndRE_FB13166_S1573/2021EPI_ISL_1821145 | 07/04/21 | North America / Mexico / Morelos    | Human | Male   | 58 | Hospitalized | Oropharyngeal swab |
| 1CoV-19/Mexico/MOR-IndRE_FB13169_S1574/2021EPI_ISL_1821146 | 08/04/21 | North America / Mexico / Morelos    | Human | Male   | 58 | Hospitalized | Oropharyngeal swab |
| 1CoV-19/Mexico/MOR-IndRE_FB13172_S1575/2021EPI_ISL_1821147 | 09/04/21 | North America / Mexico / Morelos    | Human | Male   | 71 | Hospitalized | Oropharyngeal swab |
| 1CoV-19/Mexico/MOR-IndRE_FB13173_S1576/2021EPI_ISL_1821148 | 08/04/21 | North America / Mexico / Morelos    | Human | Male   | 48 | Released     | Oropharyngeal swab |
| 1CoV-19/Mexico/GRO-IndRE_FB13175_S1577/2021EPI_ISL_1821149 | 03/04/21 | North America / Mexico / Guerrero   | Human | Male   | 65 | Hospitalized | Oropharyngeal swab |
| 1CoV-19/Mexico/GRO-IndRE_FB13177_S1578/2021EPI_ISL_1821150 | 05/04/21 | North America / Mexico / Guerrero   | Human | Male   | 77 | Live         | Oropharyngeal swab |
| 1CoV-19/Mexico/GRO-IndRE_FB13178_S1579/2021EPI_ISL_1821151 | 06/04/21 | North America / Mexico / Guerrero   | Human | Male   | 84 | Hospitalized | Oropharyngeal swab |
| 1CoV-19/Mexico/YUC-IndRE_FB13181_S1580/2021EPI_ISL_1821152 | 12/04/21 | North America / Mexico / Yucatán    | Human | Male   | 21 | Released     | Oropharyngeal swab |
| 1CoV-19/Mexico/YUC-IndRE_FB13182_S1581/2021EPI_ISL_1821153 | 12/04/21 | North America / Mexico / Yucatán    | Human | Female | 24 | Released     | Oropharyngeal swab |
| 1CoV-19/Mexico/YUC-IndRE_FB13184_S1582/2021EPI_ISL_1821154 | 11/04/21 | North America / Mexico / Yucatán    | Human | Female | 76 | Released     | Oropharyngeal swab |
| 1CoV-19/Mexico/YUC-IndRE_FB13186_S1583/2021EPI_ISL_1821155 | 12/04/21 | North America / Mexico / Yucatán    | Human | Female | 36 | Released     | Oropharyngeal swab |
| hCoV-19/Mexico/SIN-IndRE_FB13194_S1584/2021EPI_ISL_1821156 | 10/04/21 | North America / Mexico / Sinaloa    | Human | Female | 45 | Hospitalized | Oropharyngeal swab |
| hCoV-19/Mexico/SIN-IndRE_FB13195_S1585/2021EPI_ISL_1821157 | 08/04/21 | North America / Mexico / Sinaloa    | Human | Male   | 60 | Released     | Oropharyngeal swab |
| 1CoV-19/Mexico/TAM-IndRE_FB13198_S1586/2021EPI_ISL_1821158 | 09/04/21 | North America / Mexico / Tamaulipas | Human | Male   | 79 | Hospitalized | Oropharyngeal swab |
| 1CoV-19/Mexico/TAM-IndRE_FB13200_S1587/2021EPI_ISL_1821159 | 04/04/21 | North America / Mexico / Tamaulipas | Human | Female | 36 | Hospitalized | Oropharyngeal swab |
| 1CoV-19/Mexico/TAM-IndRE_FB13203_S1588/2021EPI_ISL_1821160 | 05/04/21 | North America / Mexico / Tamaulipas | Human | Male   | 22 | Released     | Oropharyngeal swab |
| 1CoV-19/Mexico/NAY-IndRE_FB13205_S1589/2021EPI_ISL_1821161 | 10/04/21 | North America / Mexico / Nayarit    | Human | Female | 37 | Hospitalized | Oropharyngeal swab |
| 1CoV-19/Mexico/OAX-IndRE_FB13221_S1590/2021EPI_ISL_1821162 | 03/04/21 | North America / Mexico / Oaxaca     | Human | Female | 64 | Hospitalized | Oropharyngeal swab |

|                                                            |          |                                              |       |        |    |              |                    |
|------------------------------------------------------------|----------|----------------------------------------------|-------|--------|----|--------------|--------------------|
| 1CoV-19/Mexico/VER-InDRE_FB13229_S1591/2021EPI_ISL_1821163 | 05/04/21 | North America / Mexico / Veracruz            | Human | Male   | 85 | Deceased     | Oropharyngeal swab |
| 1CoV-19/Mexico/VER-InDRE_FB13230_S1592/2021EPI_ISL_1821164 | 06/04/21 | North America / Mexico / Veracruz            | Human | Male   | 65 | Live         | Oropharyngeal swab |
| 1CoV-19/Mexico/VER-InDRE_FB13233_S1593/2021EPI_ISL_1821165 | 05/04/21 | North America / Mexico / Veracruz            | Human | Male   | 26 | Released     | Oropharyngeal swab |
| hCoV-19/Mexico/TLA-InDRE_FB13239_S1594/2021EPI_ISL_1821166 | 08/04/21 | North America / Mexico / Tlaxcala            | Human | Male   | 37 | Released     | Oropharyngeal swab |
| 1CoV-19/Mexico/CHH-InDRE_FB13250_S1595/2021EPI_ISL_1821167 | 06/04/21 | North America / Mexico / Chihuahua           | Human | Female | 80 | Hospitalized | Oropharyngeal swab |
| 1CoV-19/Mexico/CHH-InDRE_FB13254_S1596/2021EPI_ISL_1821168 | 12/04/21 | North America / Mexico / Chihuahua           | Human | Male   | 41 | Released     | Oropharyngeal swab |
| 1CoV-19/Mexico/CMX-InDRE_FB13258_S1597/2021EPI_ISL_1821169 | 07/04/21 | North America / Mexico / Mexico City         | Human | Male   | 56 | Hospitalized | Oropharyngeal swab |
| 1CoV-19/Mexico/CMX-InDRE_FB13259_S1598/2021EPI_ISL_1821170 | 08/04/21 | North America / Mexico / Mexico City         | Human | Male   | 51 | Hospitalized | Oropharyngeal swab |
| 1CoV-19/Mexico/ROO-InDRE_FB13270_S1599/2021EPI_ISL_1821171 | 06/04/21 | North America / Mexico / Quintana Roo        | Human | Male   | 66 | Deceased     | Oropharyngeal swab |
| 1CoV-19/Mexico/ROO-InDRE_FB13272_S1600/2021EPI_ISL_1821172 | 05/04/21 | North America / Mexico / Quintana Roo        | Human | Male   | 79 | Hospitalized | Oropharyngeal swab |
| 1CoV-19/Mexico/ZAC-InDRE_FB13275_S1601/2021EPI_ISL_1821173 | 12/04/21 | North America / Mexico / Zacatecas           | Human | Female | 20 | Released     | Oropharyngeal swab |
| 1CoV-19/Mexico/ZAC-InDRE_FB13276_S1602/2021EPI_ISL_1821174 | 13/04/21 | North America / Mexico / Zacatecas           | Human | Female | 12 | Released     | Oropharyngeal swab |
| 1CoV-19/Mexico/ZAC-InDRE_FB13277_S1603/2021EPI_ISL_1821175 | 13/04/21 | North America / Mexico / Zacatecas           | Human | Male   | 47 | Released     | Oropharyngeal swab |
| 1CoV-19/Mexico/ZAC-InDRE_FB13279_S1604/2021EPI_ISL_1821176 | 13/04/21 | North America / Mexico / Zacatecas           | Human | Female | 50 | Released     | Oropharyngeal swab |
| 1CoV-19/Mexico/ZAC-InDRE_FB13280_S1605/2021EPI_ISL_1821177 | 13/04/21 | North America / Mexico / Zacatecas           | Human | Female | 77 | Released     | Oropharyngeal swab |
| 1CoV-19/Mexico/ZAC-InDRE_FB13281_S1606/2021EPI_ISL_1821178 | 07/04/21 | North America / Mexico / Zacatecas           | Human | Female | 59 | Hospitalized | Oropharyngeal swab |
| 1CoV-19/Mexico/ZAC-InDRE_FB13283_S1607/2021EPI_ISL_1821179 | 08/04/21 | North America / Mexico / Zacatecas           | Human | Female | 29 | Hospitalized | Oropharyngeal swab |
| 1CoV-19/Mexico/BCS-InDRE_FB13288_S1608/2021EPI_ISL_1821180 | 10/04/21 | North America / Mexico / Baja California Sur | Human | Male   | 46 | Released     | Oropharyngeal swab |
| 1CoV-19/Mexico/BCS-InDRE_FB13289_S1609/2021EPI_ISL_1821181 | 10/04/21 | North America / Mexico / Baja California Sur | Human | Male   | 36 | Released     | Oropharyngeal swab |
| 1CoV-19/Mexico/BCS-InDRE_FB13291_S1610/2021EPI_ISL_1821182 | 10/04/21 | North America / Mexico / Baja California Sur | Human | Female | 33 | Released     | Oropharyngeal swab |
| 1CoV-19/Mexico/BCS-InDRE_FB13292_S1611/2021EPI_ISL_1821183 | 10/04/21 | North America / Mexico / Baja California Sur | Human | Female | 17 | Released     | Oropharyngeal swab |
| 1CoV-19/Mexico/BCS-InDRE_FB13293_S1612/2021EPI_ISL_1821184 | 10/04/21 | North America / Mexico / Baja California Sur | Human | Male   | 12 | Released     | Oropharyngeal swab |
| hCoV-19/Mexico/JAL-InDRE_FB13302_S1613/2021EPI_ISL_1821185 | 14/04/21 | North America / Mexico / Jalisco             | Human | Female | 79 | Released     | Oropharyngeal swab |
| hCoV-19/Mexico/JAL-InDRE_FB13303_S1614/2021EPI_ISL_1821186 | 07/04/21 | North America / Mexico / Jalisco             | Human | Male   | 81 | Hospitalized | Oropharyngeal swab |
| 1CoV-19/Mexico/CMX-InDRE_FB13304_S1615/2021EPI_ISL_1821187 | 03/04/21 | North America / Mexico / Mexico City         | Human | Female | 36 | Released     | Oropharyngeal swab |
| 1CoV-19/Mexico/CMX-InDRE_FB13305_S1616/2021EPI_ISL_1821188 | 02/04/21 | North America / Mexico / Mexico City         | Human | Female | 48 | Released     | Oropharyngeal swab |
| 1CoV-19/Mexico/CMX-InDRE_FB13309_S1617/2021EPI_ISL_1821189 | 05/04/21 | North America / Mexico / Mexico City         | Human | Female | 45 | Live         | Oropharyngeal swab |
| 1CoV-19/Mexico/CMX-InDRE_FB13315_S1618/2021EPI_ISL_1821190 | 06/04/21 | North America / Mexico / Mexico City         | Human | Male   | 58 | Released     | Oropharyngeal swab |
| 1CoV-19/Mexico/QUE-InDRE_FB11295_S1619/2021EPI_ISL_1821191 | 06/04/21 | North America / Mexico / Queretaro           | Human | Male   | 62 | unknown      | Oropharyngeal swab |
| 1CoV-19/Mexico/QUE-InDRE_FB11296_S1620/2021EPI_ISL_1821192 | 06/04/21 | North America / Mexico / Queretaro           | Human | Male   | 12 | unknown      | Oropharyngeal swab |
| 1CoV-19/Mexico/TAB-InDRE_FB13054_S1621/2021EPI_ISL_1821193 | 30/03/21 | North America / Mexico / Tabasco             | Human | Male   | 42 | unknown      | Oropharyngeal swab |
| hCoV-19/Mexico/HID-InDRE_FB12659_S1624/2021EPI_ISL_1821194 | 31/03/21 | North America / Mexico / Hidalgo             | Human | Female | 38 | Live         | Oropharyngeal swab |
| hCoV-19/Mexico/HID-InDRE_FB12660_S1625/2021EPI_ISL_1821195 | 02/04/21 | North America / Mexico / Hidalgo             | Human | Female | 52 | Released     | Oropharyngeal swab |
| hCoV-19/Mexico/HID-InDRE_FB12661_S1626/2021EPI_ISL_1821196 | 03/04/21 | North America / Mexico / Hidalgo             | Human | Male   | 56 | Deceased     | Oropharyngeal swab |
| hCoV-19/Mexico/JAL-InDRE_FB13056_S1627/2021EPI_ISL_1821197 | 27/03/21 | North America / Mexico / Jalisco             | Human | Male   | 53 | unknown      | Oropharyngeal swab |
| hCoV-19/Mexico/JAL-InDRE_FB13058_S1628/2021EPI_ISL_1821198 | 30/03/21 | North America / Mexico / Jalisco             | Human | Female | 37 | unknown      | Oropharyngeal swab |
| hCoV-19/Mexico/SIN-InDRE_FB13059_S1629/2021EPI_ISL_1821199 | 31/03/21 | North America / Mexico / Sinaloa             | Human | Male   | 57 | Released     | Oropharyngeal swab |
| hCoV-19/Mexico/JAL-InDRE_FB13060_S1630/2021EPI_ISL_1821200 | 02/04/21 | North America / Mexico / Jalisco             | Human | Male   | 64 | unknown      | Oropharyngeal swab |
| 1CoV-19/Mexico/BCN-InDRE_FB13333_S1631/2021EPI_ISL_1821201 | 10/04/21 | North America / Mexico / Baja California     | Human | Female | 26 | Released     | Oropharyngeal swab |
| 1CoV-19/Mexico/BCN-InDRE_FB13334_S1632/2021EPI_ISL_1821202 | 12/04/21 | North America / Mexico / Baja California     | Human | Female | 37 | Released     | Oropharyngeal swab |
| 1CoV-19/Mexico/BCN-InDRE_FB13335_S1633/2021EPI_ISL_1821203 | 13/04/21 | North America / Mexico / Baja California     | Human | Female | 66 | Released     | Oropharyngeal swab |
| hCoV-19/Mexico/CMX-INER-INMEGEN-00065/2021EPI_ISL_1824419  | 19/02/21 | North America / Mexico / Mexico City         | Human | Male   | 70 | unknown      | Oropharyngeal swab |
| hCoV-19/Mexico/CMX-INER-INMEGEN-00066/2021EPI_ISL_1824420  | 19/02/21 | North America / Mexico / Mexico City         | Human | Male   | 64 | unknown      | Oropharyngeal swab |
| hCoV-19/Mexico/CMX-INER-INMEGEN-00067/2021EPI_ISL_1824421  | 19/02/21 | North America / Mexico / Mexico City         | Human | Female | 62 | unknown      | Oropharyngeal swab |



|                                            |                 |          |                                      |       |        |    |              |                    |
|--------------------------------------------|-----------------|----------|--------------------------------------|-------|--------|----|--------------|--------------------|
| hCoV-19/Mexico/CMX-INER-INMEGEN-00122/2021 | EPI_ISL_1824468 | 25/03/21 | North America / Mexico / Mexico City | Human | Female | 27 | unknown      |                    |
| hCoV-19/Mexico/CMX-INER-INMEGEN-00123/2021 | EPI_ISL_1824469 | 29/03/21 | North America / Mexico / Mexico City | Human | Male   | 55 | unknown      |                    |
| hCoV-19/Mexico/CMX-INER-INMEGEN-00124/2021 | EPI_ISL_1824470 | 31/03/21 | North America / Mexico / Mexico City | Human | Female | 28 | unknown      |                    |
| hCoV-19/Mexico/CMX-INER-INMEGEN-00125/2021 | EPI_ISL_1824471 | 01/04/21 | North America / Mexico / Mexico City | Human | Female | 68 | unknown      |                    |
| hCoV-19/Mexico/CMX-INER-INMEGEN-00126/2021 | EPI_ISL_1824472 | 05/04/21 | North America / Mexico / Mexico City | Human | Female | 35 | unknown      |                    |
| hCoV-19/Mexico/CMX-INER-INMEGEN-00127/2021 | EPI_ISL_1824473 | 05/04/21 | North America / Mexico / Mexico City | Human | Male   | 58 | unknown      |                    |
| hCoV-19/Mexico/CMX-INER-INMEGEN-00128/2021 | EPI_ISL_1824474 | 06/04/21 | North America / Mexico / Mexico City | Human | Male   | 56 | unknown      |                    |
| hCoV-19/Mexico/CMX-INER-INMEGEN-00129/2021 | EPI_ISL_1824475 | 08/04/21 | North America / Mexico / Mexico City | Human | Male   | 86 | unknown      |                    |
| hCoV-19/Mexico/CMX-INER-INMEGEN-00130/2021 | EPI_ISL_1824476 | 08/04/21 | North America / Mexico / Mexico City | Human | Female | 52 | unknown      |                    |
| hCoV-19/Mexico/CMX-INER-INMEGEN-00132/2021 | EPI_ISL_1824478 | 07/04/21 | North America / Mexico / Mexico City | Human | Female | 46 | unknown      |                    |
| hCoV-19/Mexico/CMX-INER-INMEGEN-00133/2021 | EPI_ISL_1824479 | 07/04/21 | North America / Mexico / Mexico City | Human | Female | 34 | unknown      |                    |
| hCoV-19/Mexico/CMX-INER-INMEGEN-00134/2021 | EPI_ISL_1824480 | 07/04/21 | North America / Mexico / Mexico City | Human | Female | 49 | unknown      |                    |
| hCoV-19/Mexico/CMX-INER-INMEGEN-00135/2021 | EPI_ISL_1824481 | 07/04/21 | North America / Mexico / Mexico City | Human | Female | 71 | unknown      |                    |
| hCoV-19/Mexico/CMX-INER-INMEGEN-00137/2021 | EPI_ISL_1824483 | 07/04/21 | North America / Mexico / Mexico City | Human | Male   | 56 | unknown      |                    |
| hCoV-19/Mexico/CMX-INER-INMEGEN-00138/2021 | EPI_ISL_1824484 | 08/04/21 | North America / Mexico / Mexico City | Human | Male   | 61 | unknown      |                    |
| hCoV-19/Mexico/CMX-INER-INMEGEN-00140/2021 | EPI_ISL_1824486 | 08/04/21 | North America / Mexico / Mexico City | Human | Female | 56 | unknown      |                    |
| hCoV-19/Mexico/CMX-INER-INMEGEN-00141/2021 | EPI_ISL_1824487 | 08/04/21 | North America / Mexico / Mexico City | Human | Female | 47 | unknown      |                    |
| hCoV-19/Mexico/CMX-INER-INMEGEN-00143/2021 | EPI_ISL_1824489 | 08/04/21 | North America / Mexico / Mexico City | Human | Female | 50 | unknown      |                    |
| hCoV-19/Mexico/CMX-INER-INMEGEN-00144/2021 | EPI_ISL_1824490 | 08/04/21 | North America / Mexico / Mexico City | Human | Male   | 24 | unknown      |                    |
| hCoV-19/Mexico/CMX-INER-INMEGEN-00145/2021 | EPI_ISL_1824491 | 08/04/21 | North America / Mexico / Mexico City | Human | Male   | 64 | unknown      |                    |
| hCoV-19/Mexico/CMX-INER-INMEGEN-00146/2021 | EPI_ISL_1824492 | 08/04/21 | North America / Mexico / Mexico City | Human | Female | 66 | unknown      |                    |
| hCoV-19/Mexico/CMX-INER-INMEGEN-00147/2021 | EPI_ISL_1824493 | 08/04/21 | North America / Mexico / Mexico City | Human | Male   | 31 | unknown      |                    |
| hCoV-19/Mexico/CMX-INER-INMEGEN-00148/2021 | EPI_ISL_1824494 | 08/04/21 | North America / Mexico / Mexico City | Human | Female | 68 | unknown      |                    |
| hCoV-19/Mexico/CMX-INER-INMEGEN-00150/2021 | EPI_ISL_1824496 | 09/04/21 | North America / Mexico / Mexico City | Human | Female | 58 | unknown      |                    |
| hCoV-19/Mexico/CMX-INER-INMEGEN-00151/2021 | EPI_ISL_1824497 | 09/04/21 | North America / Mexico / Mexico City | Human | Female | 46 | unknown      |                    |
| hCoV-19/Mexico/CMX-INER-INMEGEN-00152/2021 | EPI_ISL_1824498 | 09/04/21 | North America / Mexico / Mexico City | Human | Male   | 60 | unknown      |                    |
| CoV-19/Mexico/NLE-InDRE_FB13080_S1538/2021 | EPI_ISL_1857099 | 06/04/21 | North America / Mexico / Nuevo Leon  | Human | Male   | 51 | Hospitalized | Oropharyngeal swab |
| CoV-19/Mexico/PUE-InDRE_FB13092_S1545/2021 | EPI_ISL_1857100 | 08/04/21 | North America / Mexico / Puebla      | Human | Female | 27 | Released     | Oropharyngeal swab |
| CoV-19/Mexico/GUA-InDRE_FB13134_S1562/2021 | EPI_ISL_1857101 | 10/04/21 | North America / Mexico / Guanajuato  | Human | Female | 60 | Hospitalized | Oropharyngeal swab |
| CoV-19/Mexico/CMX-InDRE_FD48254_S1622/2021 | EPI_ISL_1857102 | 09/04/21 | North America / Mexico / Mexico City | Human | Female | 35 | Released     | Oropharyngeal swab |
| CoV-19/Mexico/CMX-InDRE_FD49446_S1623/2021 | EPI_ISL_1857103 | 12/04/21 | North America / Mexico / Mexico City | Human | Female | 37 | Released     | Oropharyngeal swab |
| CoV-19/Mexico/CMX-InDRE_FD46181_S1634/2021 | EPI_ISL_1857104 | 07/04/21 | North America / Mexico / Mexico City | Human | Male   | 26 | Released     | Oropharyngeal swab |
| CoV-19/Mexico/CMX-InDRE_FD46182_S1635/2021 | EPI_ISL_1857105 | 07/04/21 | North America / Mexico / Mexico City | Human | Female | 24 | Released     | Oropharyngeal swab |
| CoV-19/Mexico/TAM-InDRE_FB12784_S1636/2021 | EPI_ISL_1857200 | 30/03/21 | North America / Mexico / Tamaulipas  | Human | Male   | 34 | Released     | Oropharyngeal swab |
| CoV-19/Mexico/GRO-InDRE_FB12806_S1637/2021 | EPI_ISL_1857201 | 30/03/21 | North America / Mexico / Guerrero    | Human | Male   | 83 | Hospitalized | Oropharyngeal swab |
| CoV-19/Mexico/YUC-InDRE_FB12810_S1638/2021 | EPI_ISL_1857202 | 03/04/21 | North America / Mexico / Yucatan     | Human | Female | 58 | Released     | Oropharyngeal swab |
| CoV-19/Mexico/YUC-InDRE_FB12814_S1640/2021 | EPI_ISL_1857204 | 05/04/21 | North America / Mexico / Yucatan     | Human | Male   | 54 | Released     | Oropharyngeal swab |
| CoV-19/Mexico/YUC-InDRE_FB12815_S1641/2021 | EPI_ISL_1857205 | 05/04/21 | North America / Mexico / Yucatan     | Human | Female | 70 | Released     | Oropharyngeal swab |
| CoV-19/Mexico/YUC-InDRE_FB12816_S1642/2021 | EPI_ISL_1857206 | 03/04/21 | North America / Mexico / Yucatan     | Human | Female | 68 | Hospitalized | Oropharyngeal swab |
| CoV-19/Mexico/CHP-InDRE_FB12823_S1643/2021 | EPI_ISL_1857207 | 02/04/21 | North America / Mexico / Chiapas     | Human | Male   | 48 | Hospitalized | Oropharyngeal swab |
| CoV-19/Mexico/QUE-InDRE_FB12830_S1645/2021 | EPI_ISL_1857208 | 30/03/21 | North America / Mexico / Queretaro   | Human | Female | 32 | Released     | Oropharyngeal swab |
| CoV-19/Mexico/QUE-InDRE_FB12831_S1646/2021 | EPI_ISL_1857209 | 31/03/21 | North America / Mexico / Queretaro   | Human | Male   | 38 | Released     | Oropharyngeal swab |
| CoV-19/Mexico/QUE-InDRE_FB12833_S1647/2021 | EPI_ISL_1857210 | 31/03/21 | North America / Mexico / Queretaro   | Human | Male   | 74 | Released     | Oropharyngeal swab |
| CoV-19/Mexico/QUE-InDRE_FB12834_S1648/2021 | EPI_ISL_1857211 | 31/03/21 | North America / Mexico / Queretaro   | Human | Male   | 56 | Released     | Oropharyngeal swab |

|                                                            |          |                                              |       |        |    |              |                    |
|------------------------------------------------------------|----------|----------------------------------------------|-------|--------|----|--------------|--------------------|
| 1CoV-19/Mexico/QUE-IndRE_FB12835_S1649/2021EPI_ISL_1857212 | 31/03/21 | North America / Mexico / Queretaro           | Human | Male   | 29 | Live         | Oropharyngeal swab |
| 1CoV-19/Mexico/QUE-IndRE_FB12837_S1650/2021EPI_ISL_1857213 | 01/04/21 | North America / Mexico / Queretaro           | Human | Male   | 75 | Deceased     | Oropharyngeal swab |
| 1CoV-19/Mexico/QUE-IndRE_FB12838_S1651/2021EPI_ISL_1857214 | 01/04/21 | North America / Mexico / Queretaro           | Human | Female | 46 | Live         | Oropharyngeal swab |
| 1CoV-19/Mexico/QUE-IndRE_FB12839_S1652/2021EPI_ISL_1857215 | 02/04/21 | North America / Mexico / Queretaro           | Human | Male   | 56 | Hospitalized | Oropharyngeal swab |
| 1CoV-19/Mexico/QUE-IndRE_FB12840_S1653/2021EPI_ISL_1857216 | 02/04/21 | North America / Mexico / Queretaro           | Human | Male   | 65 | Hospitalized | Oropharyngeal swab |
| 1CoV-19/Mexico/CMX-IndRE_FB12841_S1654/2021EPI_ISL_1857217 | 02/04/21 | North America / Mexico / Mexico City         | Human | Male   | 68 | Live         | Oropharyngeal swab |
| 1CoV-19/Mexico/QUE-IndRE_FB12844_S1655/2021EPI_ISL_1857218 | 04/04/21 | North America / Mexico / Queretaro           | Human | Male   | 42 | Released     | Oropharyngeal swab |
| 1CoV-19/Mexico/CHH-IndRE_FB12865_S1656/2021EPI_ISL_1857219 | 30/03/21 | North America / Mexico / Chihuahua           | Human | Male   | 48 | Hospitalized | Oropharyngeal swab |
| 1CoV-19/Mexico/CHH-IndRE_FB12869_S1657/2021EPI_ISL_1857220 | 31/03/21 | North America / Mexico / Chihuahua           | Human | Female | 27 | Released     | Oropharyngeal swab |
| 1CoV-19/Mexico/CHH-IndRE_FB12874_S1658/2021EPI_ISL_1857221 | 03/04/21 | North America / Mexico / Chihuahua           | Human | Female | 87 | Released     | Oropharyngeal swab |
| 1CoV-19/Mexico/BCS-IndRE_FB12885_S1661/2021EPI_ISL_1857224 | 03/04/21 | North America / Mexico / Baja California Sur | Human | Female | 42 | Released     | Oropharyngeal swab |
| 1CoV-19/Mexico/BCS-IndRE_FB12887_S1662/2021EPI_ISL_1857225 | 03/04/21 | North America / Mexico / Baja California Sur | Human | Female | 35 | Live         | Oropharyngeal swab |
| 1CoV-19/Mexico/BCS-IndRE_FB12891_S1663/2021EPI_ISL_1857226 | 03/04/21 | North America / Mexico / Baja California Sur | Human | Female | 22 | Hospitalized | Oropharyngeal swab |
| 1CoV-19/Mexico/BCS-IndRE_FB12892_S1664/2021EPI_ISL_1857227 | 04/04/21 | North America / Mexico / Baja California Sur | Human | Male   | 72 | Hospitalized | Oropharyngeal swab |
| 1CoV-19/Mexico/ROO-IndRE_FB12918_S1665/2021EPI_ISL_1857228 | 31/03/21 | North America / Mexico / Quintana Roo        | Human | Male   | 77 | Live         | Oropharyngeal swab |
| hCoV-19/Mexico/JAL-IndRE_FB12920_S1667/2021EPI_ISL_1857230 | 05/04/21 | North America / Mexico / Jalisco             | Human | Female | 60 | Hospitalized | Oropharyngeal swab |
| hCoV-19/Mexico/JAL-IndRE_FB12921_S1668/2021EPI_ISL_1857231 | 30/03/21 | North America / Mexico / Jalisco             | Human | Male   | 70 | Released     | Oropharyngeal swab |
| 1CoV-19/Mexico/COA-IndRE_FB13030_S1669/2021EPI_ISL_1857232 | 04/04/21 | North America / Mexico / Coahuila            | Human | Male   | 94 | Released     | Oropharyngeal swab |
| hCoV-19/Mexico/HID-IndRE_FB13033_S1670/2021EPI_ISL_1857233 | 06/04/21 | North America / Mexico / Hidalgo             | Human | Male   | 41 | Released     | Oropharyngeal swab |
| hCoV-19/Mexico/HID-IndRE_FB13036_S1671/2021EPI_ISL_1857234 | 06/04/21 | North America / Mexico / Hidalgo             | Human | Male   | 66 | Released     | Oropharyngeal swab |
| 1CoV-19/Mexico/BCS-IndRE_FB13043_S1672/2021EPI_ISL_1857235 | 30/03/21 | North America / Mexico / Baja California Sur | Human | Female | 37 | Released     | Oropharyngeal swab |
| 1CoV-19/Mexico/GUA-IndRE_FB13061_S1673/2021EPI_ISL_1857236 | 03/04/21 | North America / Mexico / Guanajuato          | Human | Male   | 65 | Hospitalized | Oropharyngeal swab |
| 1CoV-19/Mexico/GUA-IndRE_FB13063_S1674/2021EPI_ISL_1857237 | 05/04/21 | North America / Mexico / Guanajuato          | Human | Male   | 55 | Live         | Oropharyngeal swab |
| 1CoV-19/Mexico/GUA-IndRE_FB13067_S1675/2021EPI_ISL_1857238 | 09/04/21 | North America / Mexico / Guanajuato          | Human | Male   | 75 | Hospitalized | Oropharyngeal swab |
| 1CoV-19/Mexico/GUA-IndRE_FB13068_S1676/2021EPI_ISL_1857239 | 01/04/21 | North America / Mexico / Guanajuato          | Human | Male   | 65 | Released     | Oropharyngeal swab |
| 1CoV-19/Mexico/PUE-IndRE_FB13097_S1680/2021EPI_ISL_1857242 | 08/04/21 | North America / Mexico / Puebla              | Human | Female | 44 | Hospitalized | Oropharyngeal swab |
| 1CoV-19/Mexico/PUE-IndRE_FB13102_S1681/2021EPI_ISL_1857243 | 11/04/21 | North America / Mexico / Puebla              | Human | Female | 74 | Deceased     | Oropharyngeal swab |
| hCoV-19/Mexico/JAL-IndRE_FB13124_S1682/2021EPI_ISL_1857244 | 12/04/21 | North America / Mexico / Jalisco             | Human | Female | 70 | Released     | Oropharyngeal swab |
| 1CoV-19/Mexico/QUE-IndRE_FB13126_S1683/2021EPI_ISL_1857245 | 06/04/21 | North America / Mexico / Queretaro           | Human | Male   | 62 | Deceased     | Oropharyngeal swab |
| 1CoV-19/Mexico/QUE-IndRE_FB13129_S1684/2021EPI_ISL_1857246 | 08/04/21 | North America / Mexico / Queretaro           | Human | Female | 49 | Released     | Oropharyngeal swab |
| 1CoV-19/Mexico/MOR-IndRE_FB13148_S1688/2021EPI_ISL_1857248 | 02/04/21 | North America / Mexico / Morelos             | Human | Female | 68 | Hospitalized | Oropharyngeal swab |
| 1CoV-19/Mexico/MOR-IndRE_FB13167_S1689/2021EPI_ISL_1857249 | 07/04/21 | North America / Mexico / Morelos             | Human | Male   | 53 | Hospitalized | Oropharyngeal swab |
| 1CoV-19/Mexico/MOR-IndRE_FB13168_S1690/2021EPI_ISL_1857250 | 07/04/21 | North America / Mexico / Morelos             | Human | Male   | 68 | Hospitalized | Oropharyngeal swab |
| 1CoV-19/Mexico/MOR-IndRE_FB13171_S1691/2021EPI_ISL_1857251 | 09/04/21 | North America / Mexico / Morelos             | Human | Female | 29 | Released     | Oropharyngeal swab |
| 1CoV-19/Mexico/OAX-IndRE_FB13219_S1699/2021EPI_ISL_1857255 | 05/04/21 | North America / Mexico / Oaxaca              | Human | Male   | 49 | Released     | Oropharyngeal swab |
| 1CoV-19/Mexico/OAX-IndRE_FB13220_S1700/2021EPI_ISL_1857256 | 03/04/21 | North America / Mexico / Oaxaca              | Human | Female | 71 | Released     | Oropharyngeal swab |
| hCoV-19/Mexico/TLA-IndRE_FB13241_S1702/2021EPI_ISL_1857257 | 12/04/21 | North America / Mexico / Tlaxcala            | Human | Female | 51 | Released     | Oropharyngeal swab |
| 1CoV-19/Mexico/CHH-IndRE_FB13244_S1703/2021EPI_ISL_1857258 | 05/04/21 | North America / Mexico / Chihuahua           | Human | Male   | 28 | Released     | Oropharyngeal swab |
| 1CoV-19/Mexico/CHH-IndRE_FB13248_S1704/2021EPI_ISL_1857259 | 05/04/21 | North America / Mexico / Chihuahua           | Human | Female | 70 | Hospitalized | Oropharyngeal swab |
| 1CoV-19/Mexico/CHH-IndRE_FB13251_S1705/2021EPI_ISL_1857260 | 09/04/21 | North America / Mexico / Chihuahua           | Human | Male   | 55 | Released     | Oropharyngeal swab |
| 1CoV-19/Mexico/CHH-IndRE_FB13256_S1707/2021EPI_ISL_1857262 | 11/04/21 | North America / Mexico / Chihuahua           | Human | Male   | 73 | Deceased     | Oropharyngeal swab |
| 1CoV-19/Mexico/ZAC-IndRE_FB13278_S1709/2021EPI_ISL_1857264 | 13/04/21 | North America / Mexico / Zacatecas           | Human | Male   | 56 | Released     | Oropharyngeal swab |
| 1CoV-19/Mexico/BCS-IndRE_FB13294_S1711/2021EPI_ISL_1857266 | 10/04/21 | North America / Mexico / Baja California Sur | Human | Male   | 51 | Released     | Oropharyngeal swab |
| 1CoV-19/Mexico/BCS-IndRE_FB13299_S1712/2021EPI_ISL_1857267 | 10/04/21 | North America / Mexico / Baja California Sur | Human | Male   | 6  | Released     | Oropharyngeal swab |



|                                                            |          |                                             |       |        |    |              |                                            |
|------------------------------------------------------------|----------|---------------------------------------------|-------|--------|----|--------------|--------------------------------------------|
| iCoV-19/Mexico/CMX-InDRE_FB13306_S1713/2021EPI_ISL_1857268 | 05/04/21 | North America / Mexico / Mexico City        | Human | Male   | 65 | Released     | Oropharyngeal swab                         |
| iCoV-19/Mexico/MEX-InDRE_FB13324_S1715/2021EPI_ISL_1857270 | 04/04/21 | North America / Mexico / State of Mexico    | Human | Female | 66 | Deceased     | Oropharyngeal swab                         |
| iCoV-19/Mexico/CMX-InDRE_FD53894_S1717/2021EPI_ISL_1857272 | 13/04/21 | North America / Mexico / Mexico City        | Human | Female | 45 | Released     | Oropharyngeal swab                         |
| iCoV-19/Mexico/CMX-InDRE_FD49359_S1718/2021EPI_ISL_1857273 | 12/04/21 | North America / Mexico / Mexico City        | Human | Female | 33 | Released     | Oropharyngeal swab                         |
| iCoV-19/Mexico/CMX-InDRE_FD49545_S1719/2021EPI_ISL_1857274 | 12/04/21 | North America / Mexico / Mexico City        | Human | Male   | 62 | Released     | Oropharyngeal swab                         |
| iCoV-19/Mexico/CMX-InDRE_FD49549_S1720/2021EPI_ISL_1857275 | 13/04/21 | North America / Mexico / Mexico City        | Human | Female | 47 | Live         | Oropharyngeal swab                         |
| hCoV-19/Mexico/CMX-INMEGEN-04-04-66/2021 EPI_ISL_1857295   | 26/02/21 | North America / Mexico / Mexico City        | Human | Female | 59 | unknown      | Oropharyngeal swab                         |
| hCoV-19/Mexico/NLE-LESPNL-20210407045/2021 EPI_ISL_1911253 | 25/03/21 | North America / Mexico / Nuevo Leon         | Human | Male   | 35 | RY - UNDER   | Tasopharyngeal and/or oropharyngeal exuda  |
| hCoV-19/Mexico/NLE-LESPNL-20210407035/2021 EPI_ISL_1911254 | 27/03/21 | North America / Mexico / Nuevo Leon         | Human | Male   | 20 | RY - UNDER   | Tasopharyngeal and/or oropharyngeal exuda  |
| hCoV-19/Mexico/NLE-LESPNL-20210407027/2021 EPI_ISL_1911255 | 26/03/21 | North America / Mexico / Nuevo Leon         | Human | Female | 68 | RY - UNDER   | Tasopharyngeal and/or oropharyngeal exuda  |
| hCoV-19/Mexico/NLE-LESPNL-20210407024/2021 EPI_ISL_1911259 | 10/03/21 | North America / Mexico / Nuevo Leon         | Human | Female | 47 | RY - UNDER   | Tasopharyngeal and/or oropharyngeal exuda  |
| hCoV-19/Mexico/NLE-LESPNL-20210407022/2021 EPI_ISL_1911262 | 24/03/21 | North America / Mexico / Nuevo Leon         | Human | Female | 55 | RY - UNDER   | Tasopharyngeal and/or oropharyngeal exuda  |
| hCoV-19/Mexico/NLE-LESPNL-20210407012/2021 EPI_ISL_1911267 | 18/03/21 | North America / Mexico / Nuevo Leon         | Human | Female | 57 | NT - HOME    | MCasopharyngeal and/or oropharyngeal exuda |
| hCoV-19/Mexico/NLE-LESPNL-20210407034/2021 EPI_ISL_1911268 | 20/03/21 | North America / Mexico / Nuevo Leon         | Human | Male   | 52 | NT - HOME    | MCasopharyngeal and/or oropharyngeal exuda |
| hCoV-19/Mexico/NLE-LESPNL-20210407042/2021 EPI_ISL_1911269 | 26/03/21 | North America / Mexico / Nuevo Leon         | Human | Male   | 28 | NT - HOME    | MCasopharyngeal and/or oropharyngeal exuda |
| hCoV-19/Mexico/NLE-LESPNL-20210407023/2021 EPI_ISL_1911274 | 29/03/21 | North America / Mexico / Nuevo Leon         | Human | Male   | 27 | NT - HOME    | MCasopharyngeal and/or oropharyngeal exuda |
| hCoV-19/Mexico/NLE-LESPNL-20210407002/2021 EPI_ISL_1911278 | 10/03/21 | North America / Mexico / Nuevo Leon         | Human | Female | 36 | NT - HOME    | MCasopharyngeal and/or oropharyngeal exuda |
| hCoV-19/Mexico/NLE-LESPNL-20210407026/2021 EPI_ISL_1911279 | 31/03/21 | North America / Mexico / Nuevo Leon         | Human | Male   | 22 | NT - HOME    | MCasopharyngeal and/or oropharyngeal exuda |
| hCoV-19/Mexico/NLE-LESPNL-20210407059/2021 EPI_ISL_1911285 | 30/03/21 | North America / Mexico / Nuevo Leon         | Human | Female | 43 | NT - HOME    | MCasopharyngeal and/or oropharyngeal exuda |
| hCoV-19/Mexico/NLE-LESPNL-20210407005/2021 EPI_ISL_1911287 | 28/03/21 | North America / Mexico / Nuevo Leon         | Human | Male   | 62 | NT - HOME    | MCasopharyngeal and/or oropharyngeal exuda |
| hCoV-19/Mexico/NLE-LESPNL-20210407039/2021 EPI_ISL_1911288 | 30/03/21 | North America / Mexico / Nuevo Leon         | Human | Male   | 51 | NT - HOME    | MCasopharyngeal and/or oropharyngeal exuda |
| hCoV-19/Mexico/NLE-LESPNL-20210407047/2021 EPI_ISL_1911290 | 24/03/21 | North America / Mexico / Nuevo Leon         | Human | Male   | 61 | NT - HOME    | MCasopharyngeal and/or oropharyngeal exuda |
| hCoV-19/Mexico/NLE-LESPNL-20210407028/2021 EPI_ISL_1911291 | 17/03/21 | North America / Mexico / Nuevo Leon         | Human | Female | 49 | NT - HOME    | MCasopharyngeal and/or oropharyngeal exuda |
| hCoV-19/Mexico/NLE-LESPNL-20210407013/2021 EPI_ISL_1911293 | 16/03/21 | North America / Mexico / Nuevo Leon         | Human | Female | 21 | NT - HOME    | MCasopharyngeal and/or oropharyngeal exuda |
| hCoV-19/Mexico/NLE-LESPNL-20210407031/2021 EPI_ISL_1911300 | 17/03/21 | North America / Mexico / Nuevo Leon         | Human | Female | 35 | LIZED - SERI | Casopharyngeal and/or oropharyngeal exuda  |
| hCoV-19/Mexico/NLE-LESPNL-20210407008/2021 EPI_ISL_1911307 | 19/03/21 | North America / Mexico / Nuevo Leon         | Human | Male   | 75 | LIZED - SERI | Casopharyngeal and/or oropharyngeal exuda  |
| hCoV-19/Mexico/NLE-LESPNL-20210407001/2021 EPI_ISL_1911310 | 18/03/21 | North America / Mexico / Nuevo Leon         | Human | Female | 70 | ED - NON-SE  | Fasopharyngeal and/or oropharyngeal exuda  |
| hCoV-19/Mexico/CMX-INER-INMEGEN-00074/2021 EPI_ISL_1970838 | 19/02/21 | North America / Mexico / Mexico City        | Human | Female | 64 | unknown      |                                            |
| hCoV-19/Mexico/CMX-INER-INMEGEN-00080/2021 EPI_ISL_1970839 | 18/03/21 | North America / Mexico / Mexico City        | Human | Male   | 55 | unknown      |                                            |
| hCoV-19/Mexico/CMX-INER-INMEGEN-00087/2021 EPI_ISL_1970840 | 18/03/21 | North America / Mexico / Mexico City        | Human | Female | 70 | unknown      |                                            |
| hCoV-19/Mexico/CMX-INER-INMEGEN-00088/2021 EPI_ISL_1970841 | 17/03/21 | North America / Mexico / Mexico City        | Human | Female | 44 | unknown      |                                            |
| hCoV-19/Mexico/SIN_CIAD_HJ1324/2021 EPI_ISL_1972328        | 23/03/21 | North America / Mexico / Sinaloa            | Human | Male   | 43 | unknown      | Oropharyngeal swab                         |
| hCoV-19/Mexico/SIN_CIAD_HJ1326/2021 EPI_ISL_1972329        | 23/03/21 | North America / Mexico / Sinaloa            | Human | Male   | 47 | unknown      | Oropharyngeal swab                         |
| hCoV-19/Mexico/SIN_CIAD_HJ1439/2021 EPI_ISL_1972330        | 12/04/21 | North America / Mexico / Sinaloa            | Human | Female | 43 | unknown      | Oropharyngeal swab                         |
| hCoV-19/Mexico/SIN_CIAD_HJ1450/2021 EPI_ISL_1972331        | 14/04/21 | North America / Mexico / Sinaloa            | Human | Male   | 36 | unknown      | Oropharyngeal swab                         |
| hCoV-19/Mexico/SIN_CIAD_HJ1453/2021 EPI_ISL_1972332        | 14/04/21 | North America / Mexico / Sinaloa            | Human | Male   | 22 | unknown      | Oropharyngeal swab                         |
| hCoV-19/Mexico/SIN_CIAD_HJ1455/2021 EPI_ISL_1972333        | 14/04/21 | North America / Mexico / Sinaloa            | Human | Female | 48 | unknown      | Oropharyngeal swab                         |
| hCoV-19/Mexico/SIN_CIAD_HJ1457/2021 EPI_ISL_1972334        | 14/04/21 | North America / Mexico / Sinaloa            | Human | Male   | 79 | unknown      | Oropharyngeal swab                         |
| hCoV-19/Mexico/SIN_CIAD_ID2018/2021 EPI_ISL_1972335        | 24/03/21 | North America / Mexico / Sinaloa            | Human | Male   | 82 | unknown      | Oropharyngeal swab                         |
| hCoV-19/Mexico/SIN_CIAD_ID2135/2021 EPI_ISL_1972337        | 07/04/21 | North America / Mexico / Sinaloa            | Human | Female | 70 | unknown      | Oropharyngeal swab                         |
| hCoV-19/Mexico/SIN_CIAD_S6387/2021 EPI_ISL_1972338         | 24/03/21 | North America / Mexico / Sinaloa            | Human | Male   | 35 | unknown      | Oropharyngeal swab                         |
| hCoV-19/Mexico/SIN_CIAD_S6499/2021 EPI_ISL_1972339         | 07/04/21 | North America / Mexico / Sinaloa            | Human | Female | 42 | unknown      | Oropharyngeal swab                         |
| hCoV-19/Mexico/SIN_CIAD_S6653/2021 EPI_ISL_2026396         | 27/04/21 | North America / Mexico / Sinaloa / Mazatlan | Human | Male   | 52 | unknown      | Oropharyngeal swab                         |
| hCoV-19/Mexico/SIN_CIAD_S6644/2021 EPI_ISL_2026398         | 26/04/21 | North America / Mexico / Sinaloa / Mazatlan | Human | Male   | 35 | unknown      | Oropharyngeal swab                         |





|                                         |                 |          |                                          |       |        |    |              |                                       |
|-----------------------------------------|-----------------|----------|------------------------------------------|-------|--------|----|--------------|---------------------------------------|
| hCoV-19/Mexico/OAX_INER_IMSS_00687/2021 | EPI_ISL_2091143 | 17/03/21 | North America / Mexico / Oaxaca          | Human | Male   | 75 | Hospitalized | Nasopharyngeal swab                   |
| hCoV-19/Mexico/HID_INER_IMSS_00688/2021 | EPI_ISL_2091144 | 19/03/21 | North America / Mexico / Hidalgo         | Human | Male   | 52 | Hospitalized | Nasopharyngeal and oropharyngeal swab |
| hCoV-19/Mexico/MIC_INER_IMSS_00689/2021 | EPI_ISL_2091145 | 16/03/21 | North America / Mexico / Michoacan       | Human | Female | 91 | Hospitalized | Nasopharyngeal and oropharyngeal swab |
| hCoV-19/Mexico/MEX_INER_IMSS_00691/2021 | EPI_ISL_2091147 | 21/03/21 | North America / Mexico / State of Mexico | Human | Male   | 51 | Hospitalized | Nasopharyngeal and oropharyngeal swab |
| hCoV-19/Mexico/QUE_INER_IMSS_00692/2021 | EPI_ISL_2091148 | 22/03/21 | North America / Mexico / Queretaro       | Human | Female | 85 | Hospitalized | Nasopharyngeal and oropharyngeal swab |
| hCoV-19/Mexico/CMX_INER_IMSS_00693/2021 | EPI_ISL_2091149 | 22/03/21 | North America / Mexico / Mexico City     | Human | Female | 69 | Hospitalized | Nasopharyngeal and oropharyngeal swab |
| hCoV-19/Mexico/MEX_INER_IMSS_00694/2021 | EPI_ISL_2091150 | 22/03/21 | North America / Mexico / State of Mexico | Human | Female | 67 | Hospitalized | Nasopharyngeal and oropharyngeal swab |
| hCoV-19/Mexico/CMX_INER_IMSS_00695/2021 | EPI_ISL_2091151 | 22/03/21 | North America / Mexico / Mexico City     | Human | Male   | 57 | Ambulatory   | Nasopharyngeal and oropharyngeal swab |
| hCoV-19/Mexico/MEX_INER_IMSS_00696/2021 | EPI_ISL_2091152 | 21/03/21 | North America / Mexico / State of Mexico | Human | Female | 67 | Hospitalized | Nasopharyngeal and oropharyngeal swab |
| hCoV-19/Mexico/CMX_INER_IMSS_00697/2021 | EPI_ISL_2091153 | 21/03/21 | North America / Mexico / Mexico City     | Human | Female | 39 | Hospitalized | Oropharyngeal swab                    |
| hCoV-19/Mexico/CMX_INER_IMSS_00698/2021 | EPI_ISL_2091154 | 22/03/21 | North America / Mexico / Mexico City     | Human | Male   | 62 | Hospitalized | Oropharyngeal swab                    |
| hCoV-19/Mexico/CMX_INER_IMSS_00699/2021 | EPI_ISL_2091155 | 22/03/21 | North America / Mexico / Mexico City     | Human | Male   | 50 | Hospitalized | Oropharyngeal swab                    |
| hCoV-19/Mexico/CMX_INER_IMSS_00700/2021 | EPI_ISL_2091156 | 22/03/21 | North America / Mexico / Mexico City     | Human | Female | 59 | Hospitalized | Oropharyngeal swab                    |
| hCoV-19/Mexico/CMX_INER_IMSS_00701/2021 | EPI_ISL_2091157 | 21/03/21 | North America / Mexico / Mexico City     | Human | Male   | 71 | Hospitalized | Oropharyngeal swab                    |
| hCoV-19/Mexico/CMX_INER_IMSS_00702/2021 | EPI_ISL_2091158 | 21/03/21 | North America / Mexico / Mexico City     | Human | Female | 54 | Hospitalized | Oropharyngeal swab                    |
| hCoV-19/Mexico/CMX_INER_IMSS_00703/2021 | EPI_ISL_2091159 | 20/03/21 | North America / Mexico / Mexico City     | Human | Female | 89 | Hospitalized | Oropharyngeal swab                    |
| hCoV-19/Mexico/NLE_INER_IMSS_00704/2021 | EPI_ISL_2091160 | 04/04/21 | North America / Mexico / Nuevo Leon      | Human | Female | 57 | Ambulatory   | Nasopharyngeal swab                   |
| hCoV-19/Mexico/NLE_INER_IMSS_00705/2021 | EPI_ISL_2091161 | 04/04/21 | North America / Mexico / Nuevo Leon      | Human | Male   | 80 | Hospitalized | Nasopharyngeal swab                   |
| hCoV-19/Mexico/NLE_INER_IMSS_00707/2021 | EPI_ISL_2091163 | 05/04/21 | North America / Mexico / Nuevo Leon      | Human | Female | 45 | Ambulatory   | Nasopharyngeal and oropharyngeal swab |
| hCoV-19/Mexico/NLE_INER_IMSS_00708/2021 | EPI_ISL_2091164 | 05/04/21 | North America / Mexico / Nuevo Leon      | Human | Male   | 58 | Ambulatory   | Nasopharyngeal and oropharyngeal swab |
| hCoV-19/Mexico/NLE_INER_IMSS_00709/2021 | EPI_ISL_2091165 | 05/04/21 | North America / Mexico / Nuevo Leon      | Human | Male   | 71 | Hospitalized | Nasopharyngeal and oropharyngeal swab |
| hCoV-19/Mexico/NLE_INER_IMSS_00710/2021 | EPI_ISL_2091166 | 05/04/21 | North America / Mexico / Nuevo Leon      | Human | Male   | 68 | Hospitalized | Nasopharyngeal swab                   |
| hCoV-19/Mexico/NLE_INER_IMSS_00711/2021 | EPI_ISL_2091167 | 05/04/21 | North America / Mexico / Nuevo Leon      | Human | Female | 39 | Hospitalized | Nasopharyngeal and oropharyngeal swab |
| hCoV-19/Mexico/NLE_INER_IMSS_00713/2021 | EPI_ISL_2091169 | 05/04/21 | North America / Mexico / Nuevo Leon      | Human | Male   | 44 | Ambulatory   | Nasopharyngeal swab                   |
| hCoV-19/Mexico/NLE_INER_IMSS_00714/2021 | EPI_ISL_2091170 | 05/04/21 | North America / Mexico / Nuevo Leon      | Human | Male   | 58 | Hospitalized | Nasopharyngeal and oropharyngeal swab |
| hCoV-19/Mexico/NLE_INER_IMSS_00715/2021 | EPI_ISL_2091171 | 02/04/21 | North America / Mexico / Nuevo Leon      | Human | Male   | 89 | Hospitalized | Nasopharyngeal and oropharyngeal swab |
| hCoV-19/Mexico/DUR_INER_IMSS_00717/2021 | EPI_ISL_2091173 | 01/04/21 | North America / Mexico / Durango         | Human | Male   | 90 | Ambulatory   | Nasopharyngeal and oropharyngeal swab |
| hCoV-19/Mexico/NLE_INER_IMSS_00719/2021 | EPI_ISL_2091175 | 06/04/21 | North America / Mexico / Nuevo Leon      | Human | Male   | 26 | Ambulatory   | Nasopharyngeal and oropharyngeal swab |
| hCoV-19/Mexico/NLE_INER_IMSS_00720/2021 | EPI_ISL_2091176 | 07/04/21 | North America / Mexico / Nuevo Leon      | Human | Female | 36 | Hospitalized | Nasopharyngeal and oropharyngeal swab |
| hCoV-19/Mexico/NLE_INER_IMSS_00721/2021 | EPI_ISL_2091177 | 07/04/21 | North America / Mexico / Nuevo Leon      | Human | Male   | 79 | Hospitalized | Nasopharyngeal and oropharyngeal swab |
| hCoV-19/Mexico/NLE_INER_IMSS_00722/2021 | EPI_ISL_2091178 | 07/04/21 | North America / Mexico / Nuevo Leon      | Human | Male   | 48 | Ambulatory   | Nasopharyngeal and oropharyngeal swab |
| hCoV-19/Mexico/DUR_INER_IMSS_00724/2021 | EPI_ISL_2091180 | 06/04/21 | North America / Mexico / Durango         | Human | Male   | 85 | Hospitalized | Nasopharyngeal and oropharyngeal swab |
| hCoV-19/Mexico/TAM_INER_IMSS_00726/2021 | EPI_ISL_2091182 | 07/04/21 | North America / Mexico / Tamaulipas      | Human | Male   | 14 | Hospitalized | Nasopharyngeal swab                   |
| hCoV-19/Mexico/NLE_INER_IMSS_00727/2021 | EPI_ISL_2091183 | 07/04/21 | North America / Mexico / Nuevo Leon      | Human | Male   | 31 | Ambulatory   | Nasopharyngeal and oropharyngeal swab |
| hCoV-19/Mexico/COA_INER_IMSS_00728/2021 | EPI_ISL_2091184 | 06/04/21 | North America / Mexico / Coahuila        | Human | Male   | 62 | Ambulatory   | Nasopharyngeal and oropharyngeal swab |
| hCoV-19/Mexico/DUR_INER_IMSS_00729/2021 | EPI_ISL_2091185 | 07/04/21 | North America / Mexico / Durango         | Human | Female | 66 | Hospitalized | Nasopharyngeal and oropharyngeal swab |
| hCoV-19/Mexico/COA_INER_IMSS_00730/2021 | EPI_ISL_2091186 | 05/04/21 | North America / Mexico / Coahuila        | Human | Female | 50 | Ambulatory   | Nasopharyngeal and oropharyngeal swab |
| hCoV-19/Mexico/NLE_INER_IMSS_00731/2021 | EPI_ISL_2091187 | 08/04/21 | North America / Mexico / Nuevo Leon      | Human | Female | 76 | Ambulatory   | Nasopharyngeal and oropharyngeal swab |
| hCoV-19/Mexico/NLE_INER_IMSS_00732/2021 | EPI_ISL_2091188 | 08/04/21 | North America / Mexico / Nuevo Leon      | Human | Female | 88 | Hospitalized | Nasopharyngeal swab                   |
| hCoV-19/Mexico/CHH_INER_IMSS_00734/2021 | EPI_ISL_2091190 | 04/04/21 | North America / Mexico / Chihuahua       | Human | Male   | 60 | Ambulatory   | Nasopharyngeal swab                   |
| hCoV-19/Mexico/NLE_INER_IMSS_00736/2021 | EPI_ISL_2091192 | 08/04/21 | North America / Mexico / Nuevo Leon      | Human | Female | 61 | Hospitalized | Nasopharyngeal and oropharyngeal swab |
| hCoV-19/Mexico/DUR_INER_IMSS_00737/2021 | EPI_ISL_2091193 | 08/04/21 | North America / Mexico / Durango         | Human | Female | 66 | Hospitalized | Nasopharyngeal and oropharyngeal swab |
| hCoV-19/Mexico/DUR_INER_IMSS_00738/2021 | EPI_ISL_2091194 | 07/04/21 | North America / Mexico / Durango         | Human | Female | 64 | Hospitalized | Nasopharyngeal and oropharyngeal swab |
| hCoV-19/Mexico/CHH_INER_IMSS_00739/2021 | EPI_ISL_2091195 | 06/04/21 | North America / Mexico / Chihuahua       | Human | Female | 73 | Hospitalized | Nasopharyngeal and oropharyngeal swab |

|                                         |                 |          |                                       |       |        |    |              |                                       |
|-----------------------------------------|-----------------|----------|---------------------------------------|-------|--------|----|--------------|---------------------------------------|
| hCoV-19/Mexico/CHH_INER_IMSS_00742/2021 | EPI_ISL_2091197 | 06/04/21 | North America / Mexico / Chihuahua    | Human | Male   | 71 | Hospitalized | Nasopharyngeal and oropharyngeal swab |
| hCoV-19/Mexico/NLE_INER_IMSS_00747/2021 | EPI_ISL_2091202 | 12/04/21 | North America / Mexico / Nuevo Leon   | Human | Female | 39 | Hospitalized | Nasopharyngeal and oropharyngeal swab |
| hCoV-19/Mexico/NLE_INER_IMSS_00748/2021 | EPI_ISL_2091203 | 12/04/21 | North America / Mexico / Nuevo Leon   | Human | Male   | 85 | Hospitalized | Nasopharyngeal and oropharyngeal swab |
| hCoV-19/Mexico/NLE_INER_IMSS_00749/2021 | EPI_ISL_2091204 | 12/04/21 | North America / Mexico / Nuevo Leon   | Human | Female | 52 | Ambulatory   | Nasopharyngeal and oropharyngeal swab |
| hCoV-19/Mexico/NLE_INER_IMSS_00750/2021 | EPI_ISL_2091205 | 12/04/21 | North America / Mexico / Nuevo Leon   | Human | Female | 74 | Hospitalized | Nasopharyngeal and oropharyngeal swab |
| hCoV-19/Mexico/NLE_INER_IMSS_00752/2021 | EPI_ISL_2091206 | 13/04/21 | North America / Mexico / Nuevo Leon   | Human | Female | 54 | Hospitalized | Nasopharyngeal and oropharyngeal swab |
| hCoV-19/Mexico/COA_INER_IMSS_00755/2021 | EPI_ISL_2091209 | 11/04/21 | North America / Mexico / Coahuila     | Human | Female | 77 | Hospitalized | Nasopharyngeal and oropharyngeal swab |
| hCoV-19/Mexico/NLE_INER_IMSS_00756/2021 | EPI_ISL_2091210 | 13/04/21 | North America / Mexico / Nuevo Leon   | Human | Female | 70 | Hospitalized | Nasopharyngeal and oropharyngeal swab |
| hCoV-19/Mexico/NLE_INER_IMSS_00757/2021 | EPI_ISL_2091211 | 13/04/21 | North America / Mexico / Nuevo Leon   | Human | Female | 65 | Hospitalized | Nasopharyngeal and oropharyngeal swab |
| hCoV-19/Mexico/CHH_INER_IMSS_00759/2021 | EPI_ISL_2091213 | 06/04/21 | North America / Mexico / Chihuahua    | Human | Female | 33 | Ambulatory   | Nasopharyngeal and oropharyngeal swab |
| hCoV-19/Mexico/CHH_INER_IMSS_00760/2021 | EPI_ISL_2091214 | 11/04/21 | North America / Mexico / Chihuahua    | Human | Female | 25 | Ambulatory   | Nasopharyngeal swab                   |
| hCoV-19/Mexico/NLE_INER_IMSS_00761/2021 | EPI_ISL_2091215 | 15/04/21 | North America / Mexico / Nuevo Leon   | Human | Female | 76 | Ambulatory   | Nasopharyngeal and oropharyngeal swab |
| hCoV-19/Mexico/NLE_INER_IMSS_00764/2021 | EPI_ISL_2091218 | 15/04/21 | North America / Mexico / Nuevo Leon   | Human | Male   | 69 | Ambulatory   | Nasopharyngeal and oropharyngeal swab |
| hCoV-19/Mexico/CHH_INER_IMSS_00766/2021 | EPI_ISL_2091220 | 12/04/21 | North America / Mexico / Chihuahua    | Human | Male   | 65 | Hospitalized | Nasopharyngeal swab                   |
| hCoV-19/Mexico/NLE_INER_IMSS_00769/2021 | EPI_ISL_2091223 | 16/04/21 | North America / Mexico / Nuevo Leon   | Human | Female | 24 | Ambulatory   | Nasopharyngeal and oropharyngeal swab |
| hCoV-19/Mexico/NLE_INER_IMSS_00770/2021 | EPI_ISL_2091224 | 16/04/21 | North America / Mexico / Nuevo Leon   | Human | Female | 42 | Hospitalized | Nasopharyngeal and oropharyngeal swab |
| hCoV-19/Mexico/YUC_INER_IMSS_00772/2021 | EPI_ISL_2091226 | 31/03/21 | North America / Mexico / Yucatan      | Human | Male   | 45 | Ambulatory   | Nasopharyngeal and oropharyngeal swab |
| hCoV-19/Mexico/YUC_INER_IMSS_00773/2021 | EPI_ISL_2091227 | 31/03/21 | North America / Mexico / Yucatan      | Human | Female | 81 | Hospitalized | Nasopharyngeal and oropharyngeal swab |
| hCoV-19/Mexico/YUC_INER_IMSS_00775/2021 | EPI_ISL_2091229 | 04/04/21 | North America / Mexico / Yucatan      | Human | Female | 71 | Hospitalized | Nasopharyngeal and oropharyngeal swab |
| hCoV-19/Mexico/YUC_INER_IMSS_00776/2021 | EPI_ISL_2091230 | 06/04/21 | North America / Mexico / Yucatan      | Human | Female | 47 | Ambulatory   | Nasopharyngeal and oropharyngeal swab |
| hCoV-19/Mexico/YUC_INER_IMSS_00777/2021 | EPI_ISL_2091231 | 07/04/21 | North America / Mexico / Yucatan      | Human | Female | 45 | Ambulatory   | Nasopharyngeal and oropharyngeal swab |
| hCoV-19/Mexico/TAB_INER_IMSS_00779/2021 | EPI_ISL_2091233 | 07/04/21 | North America / Mexico / Tabasco      | Human | Female | 52 | Hospitalized | Nasopharyngeal and oropharyngeal swab |
| hCoV-19/Mexico/YUC_INER_IMSS_00780/2021 | EPI_ISL_2091234 | 08/04/21 | North America / Mexico / Yucatan      | Human | Male   | 26 | Ambulatory   | Nasopharyngeal and oropharyngeal swab |
| hCoV-19/Mexico/YUC_INER_IMSS_00781/2021 | EPI_ISL_2091235 | 08/04/21 | North America / Mexico / Yucatan      | Human | Male   | 62 | Ambulatory   | Nasopharyngeal and oropharyngeal swab |
| hCoV-19/Mexico/YUC_INER_IMSS_00783/2021 | EPI_ISL_2091237 | 09/04/21 | North America / Mexico / Yucatan      | Human | Female | 57 | Ambulatory   | Nasopharyngeal and oropharyngeal swab |
| hCoV-19/Mexico/YUC_INER_IMSS_00784/2021 | EPI_ISL_2091238 | 09/04/21 | North America / Mexico / Yucatan      | Human | Female | 55 | Ambulatory   | Nasopharyngeal and oropharyngeal swab |
| hCoV-19/Mexico/ROO_INER_IMSS_00787/2021 | EPI_ISL_2091240 | 07/04/21 | North America / Mexico / Quintana Roo | Human | Male   | 34 | Hospitalized | Nasopharyngeal and oropharyngeal swab |
| hCoV-19/Mexico/CAM_INER_IMSS_00788/2021 | EPI_ISL_2091241 | 07/04/21 | North America / Mexico / Campeche     | Human | Female | 56 | Hospitalized | Nasopharyngeal and oropharyngeal swab |
| hCoV-19/Mexico/TAB_INER_IMSS_00793/2021 | EPI_ISL_2091246 | 08/04/21 | North America / Mexico / Tabasco      | Human | Male   | 35 | Ambulatory   | Nasopharyngeal and oropharyngeal swab |
| hCoV-19/Mexico/YUC_INER_IMSS_00794/2021 | EPI_ISL_2091247 | 10/04/21 | North America / Mexico / Yucatan      | Human | Male   | 75 | Hospitalized | Nasopharyngeal and oropharyngeal swab |
| hCoV-19/Mexico/CAM_INER_IMSS_00795/2021 | EPI_ISL_2091248 | 09/04/21 | North America / Mexico / Campeche     | Human | Male   | 49 | Ambulatory   | Nasopharyngeal and oropharyngeal swab |
| hCoV-19/Mexico/CAM_INER_IMSS_00796/2021 | EPI_ISL_2091249 | 09/04/21 | North America / Mexico / Campeche     | Human | Male   | 40 | Ambulatory   | Nasopharyngeal and oropharyngeal swab |
| hCoV-19/Mexico/CAM_INER_IMSS_00797/2021 | EPI_ISL_2091250 | 09/04/21 | North America / Mexico / Campeche     | Human | Male   | 46 | Ambulatory   | Nasopharyngeal and oropharyngeal swab |
| hCoV-19/Mexico/YUC_INER_IMSS_00798/2021 | EPI_ISL_2091251 | 12/04/21 | North America / Mexico / Yucatan      | Human | Female | 58 | Ambulatory   | Nasopharyngeal and oropharyngeal swab |
| hCoV-19/Mexico/CAM_INER_IMSS_00799/2021 | EPI_ISL_2091252 | 10/04/21 | North America / Mexico / Campeche     | Human | Male   | 33 | Ambulatory   | Nasopharyngeal and oropharyngeal swab |
| hCoV-19/Mexico/CAM_INER_IMSS_00800/2021 | EPI_ISL_2091253 | 10/04/21 | North America / Mexico / Campeche     | Human | Male   | 24 | Ambulatory   | Nasopharyngeal and oropharyngeal swab |
| hCoV-19/Mexico/TAB_INER_IMSS_00802/2021 | EPI_ISL_2091254 | 10/04/21 | North America / Mexico / Tabasco      | Human | Female | 55 | Hospitalized | Nasopharyngeal and oropharyngeal swab |
| hCoV-19/Mexico/YUC_INER_IMSS_00803/2021 | EPI_ISL_2091255 | 13/04/21 | North America / Mexico / Yucatan      | Human | Female | 40 | Ambulatory   | Nasopharyngeal and oropharyngeal swab |
| hCoV-19/Mexico/YUC_INER_IMSS_00804/2021 | EPI_ISL_2091256 | 12/04/21 | North America / Mexico / Yucatan      | Human | Female | 34 | Ambulatory   | Nasopharyngeal and oropharyngeal swab |
| hCoV-19/Mexico/NAY_INER_IMSS_00807/2021 | EPI_ISL_2091259 | 05/04/21 | North America / Mexico / Nayarit      | Human | Female | 74 | Hospitalized | Nasopharyngeal and oropharyngeal swab |
| hCoV-19/Mexico/GUA_INER_IMSS_00809/2021 | EPI_ISL_2091260 | 04/04/21 | North America / Mexico / Guanajuato   | Human | Male   | 51 | Hospitalized | Nasopharyngeal and oropharyngeal swab |
| hCoV-19/Mexico/GUA_INER_IMSS_00810/2021 | EPI_ISL_2091261 | 01/04/21 | North America / Mexico / Guanajuato   | Human | Male   | 50 | Ambulatory   | Nasopharyngeal and oropharyngeal swab |
| hCoV-19/Mexico/JAL_INER_IMSS_00811/2021 | EPI_ISL_2091262 | 04/04/21 | North America / Mexico / Jalisco      | Human | Female | 37 | Hospitalized | Nasopharyngeal and oropharyngeal swab |
| hCoV-19/Mexico/JAL_INER_IMSS_00812/2021 | EPI_ISL_2091263 | 31/03/21 | North America / Mexico / Jalisco      | Human | Female | 64 | Hospitalized | Nasopharyngeal swab                   |

|                                         |                 |          |                                      |       |        |    |              |                                       |
|-----------------------------------------|-----------------|----------|--------------------------------------|-------|--------|----|--------------|---------------------------------------|
| hCoV-19/Mexico/SIN_INER_IMSS_00813/2021 | EPI_ISL_2091264 | 04/04/21 | North America / Mexico / Sinaloa     | Human | Male   | 44 | Ambulatory   | Nasopharyngeal and oropharyngeal swab |
| hCoV-19/Mexico/SIN_INER_IMSS_00814/2021 | EPI_ISL_2091265 | 04/04/21 | North America / Mexico / Sinaloa     | Human | Female | 52 | Hospitalized | Nasopharyngeal and oropharyngeal swab |
| hCoV-19/Mexico/JAL_INER_IMSS_00815/2021 | EPI_ISL_2091266 | 08/04/21 | North America / Mexico / Jalisco     | Human | Male   | 28 | Ambulatory   | Nasopharyngeal and oropharyngeal swab |
| hCoV-19/Mexico/JAL_INER_IMSS_00816/2021 | EPI_ISL_2091267 | 08/04/21 | North America / Mexico / Jalisco     | Human | Female | 72 | Hospitalized | Nasopharyngeal and oropharyngeal swab |
| hCoV-19/Mexico/SIN_INER_IMSS_00817/2021 | EPI_ISL_2091268 | 07/04/21 | North America / Mexico / Sinaloa     | Human | Female | 54 | Hospitalized | Nasopharyngeal and oropharyngeal swab |
| hCoV-19/Mexico/JAL_INER_IMSS_00818/2021 | EPI_ISL_2091269 | 08/04/21 | North America / Mexico / Jalisco     | Human | Female | 53 | Hospitalized | Nasopharyngeal and oropharyngeal swab |
| hCoV-19/Mexico/SIN_INER_IMSS_00820/2021 | EPI_ISL_2091271 | 06/04/21 | North America / Mexico / Sinaloa     | Human | Male   | 67 | Hospitalized | Nasopharyngeal and oropharyngeal swab |
| hCoV-19/Mexico/JAL_INER_IMSS_00821/2021 | EPI_ISL_2091272 | 09/04/21 | North America / Mexico / Jalisco     | Human | Female | 33 | Ambulatory   | Nasopharyngeal and oropharyngeal swab |
| hCoV-19/Mexico/JAL_INER_IMSS_00823/2021 | EPI_ISL_2091274 | 09/04/21 | North America / Mexico / Jalisco     | Human | Male   | 42 | Ambulatory   | Nasopharyngeal and oropharyngeal swab |
| hCoV-19/Mexico/JAL_INER_IMSS_00825/2021 | EPI_ISL_2091276 | 09/04/21 | North America / Mexico / Jalisco     | Human | Male   | 74 | Hospitalized | Nasopharyngeal and oropharyngeal swab |
| hCoV-19/Mexico/NAY_INER_IMSS_00827/2021 | EPI_ISL_2091278 | 07/04/21 | North America / Mexico / Nayarit     | Human | Male   | 31 | Ambulatory   | Nasopharyngeal and oropharyngeal swab |
| hCoV-19/Mexico/JAL_INER_IMSS_00829/2021 | EPI_ISL_2091280 | 09/04/21 | North America / Mexico / Jalisco     | Human | Male   | 76 | Hospitalized | Nasopharyngeal and oropharyngeal swab |
| hCoV-19/Mexico/GUA_INER_IMSS_00832/2021 | EPI_ISL_2091283 | 09/04/21 | North America / Mexico / Guanajuato  | Human | Female | 64 | Hospitalized | Nasopharyngeal and oropharyngeal swab |
| hCoV-19/Mexico/JAL_INER_IMSS_00833/2021 | EPI_ISL_2091284 | 10/04/21 | North America / Mexico / Jalisco     | Human | Female | 62 | Hospitalized | Oropharyngeal swab                    |
| hCoV-19/Mexico/JAL_INER_IMSS_00835/2021 | EPI_ISL_2091286 | 11/04/21 | North America / Mexico / Jalisco     | Human | Male   | 14 | Ambulatory   | Nasopharyngeal and oropharyngeal swab |
| hCoV-19/Mexico/JAL_INER_IMSS_00838/2021 | EPI_ISL_2091289 | 12/04/21 | North America / Mexico / Jalisco     | Human | Female | 57 | Ambulatory   | Nasopharyngeal and oropharyngeal swab |
| hCoV-19/Mexico/SIN_INER_IMSS_00842/2021 | EPI_ISL_2091293 | 11/04/21 | North America / Mexico / Sinaloa     | Human | Female | 52 | Hospitalized | Nasopharyngeal and oropharyngeal swab |
| hCoV-19/Mexico/JAL_INER_IMSS_00843/2021 | EPI_ISL_2091294 | 12/04/21 | North America / Mexico / Jalisco     | Human | Female | 45 | Hospitalized | Nasopharyngeal and oropharyngeal swab |
| hCoV-19/Mexico/JAL_INER_IMSS_00844/2021 | EPI_ISL_2091295 | 12/04/21 | North America / Mexico / Jalisco     | Human | Male   | 76 | Hospitalized | Nasopharyngeal and oropharyngeal swab |
| hCoV-19/Mexico/JAL_INER_IMSS_00845/2021 | EPI_ISL_2091296 | 12/04/21 | North America / Mexico / Jalisco     | Human | Female | 87 | Hospitalized | Nasopharyngeal and oropharyngeal swab |
| hCoV-19/Mexico/GUA_INER_IMSS_00847/2021 | EPI_ISL_2091298 | 09/04/21 | North America / Mexico / Guanajuato  | Human | Female | 46 | Hospitalized | Nasopharyngeal and oropharyngeal swab |
| hCoV-19/Mexico/GUA_INER_IMSS_00848/2021 | EPI_ISL_2091299 | 12/04/21 | North America / Mexico / Guanajuato  | Human | Male   | 24 | Ambulatory   | Oropharyngeal swab                    |
| hCoV-19/Mexico/MIC_INER_IMSS_00849/2021 | EPI_ISL_2091300 | 08/04/21 | North America / Mexico / Michoacan   | Human | Male   | 71 | Hospitalized | Nasopharyngeal and oropharyngeal swab |
| hCoV-19/Mexico/NAY_INER_IMSS_00850/2021 | EPI_ISL_2091301 | 13/04/21 | North America / Mexico / Nayarit     | Human | Male   | 50 | Hospitalized | Nasopharyngeal and oropharyngeal swab |
| hCoV-19/Mexico/SON_INER_IMSS_00851/2021 | EPI_ISL_2091302 | 12/04/21 | North America / Mexico / Sonora      | Human | Male   | 49 | Hospitalized | Nasopharyngeal swab                   |
| hCoV-19/Mexico/JAL_INER_IMSS_00852/2021 | EPI_ISL_2091303 | 14/04/21 | North America / Mexico / Jalisco     | Human | Female | 82 | Hospitalized | Nasopharyngeal and oropharyngeal swab |
| hCoV-19/Mexico/JAL_INER_IMSS_00853/2021 | EPI_ISL_2091304 | 14/04/21 | North America / Mexico / Jalisco     | Human | Female | 52 | Hospitalized | Oropharyngeal swab                    |
| hCoV-19/Mexico/JAL_INER_IMSS_00854/2021 | EPI_ISL_2091305 | 12/04/21 | North America / Mexico / Jalisco     | Human | Male   | 99 | Hospitalized | Nasopharyngeal and oropharyngeal swab |
| hCoV-19/Mexico/MIC_INER_IMSS_00855/2021 | EPI_ISL_2091306 | 08/04/21 | North America / Mexico / Michoacan   | Human | Male   | 53 | Ambulatory   | Nasopharyngeal and oropharyngeal swab |
| hCoV-19/Mexico/MIC_INER_IMSS_00856/2021 | EPI_ISL_2091307 | 12/04/21 | North America / Mexico / Michoacan   | Human | Male   | 55 | Hospitalized | Nasopharyngeal and oropharyngeal swab |
| hCoV-19/Mexico/JAL_INER_IMSS_00858/2021 | EPI_ISL_2091309 | 14/04/21 | North America / Mexico / Jalisco     | Human | Male   | 61 | Hospitalized | Nasopharyngeal and oropharyngeal swab |
| hCoV-19/Mexico/JAL_INER_IMSS_00859/2021 | EPI_ISL_2091310 | 15/04/21 | North America / Mexico / Jalisco     | Human | Male   | 49 | Ambulatory   | Nasopharyngeal and oropharyngeal swab |
| hCoV-19/Mexico/GUA_INER_IMSS_00860/2021 | EPI_ISL_2091311 | 13/04/21 | North America / Mexico / Guanajuato  | Human | Male   | 30 | Ambulatory   | Nasopharyngeal and oropharyngeal swab |
| hCoV-19/Mexico/JAL_INER_IMSS_00862/2021 | EPI_ISL_2091313 | 15/04/21 | North America / Mexico / Jalisco     | Human | Male   | 39 | Ambulatory   | Nasopharyngeal and oropharyngeal swab |
| hCoV-19/Mexico/NAY_INER_IMSS_00863/2021 | EPI_ISL_2091314 | 14/04/21 | North America / Mexico / Nayarit     | Human | Female | 48 | Hospitalized | Nasopharyngeal and oropharyngeal swab |
| hCoV-19/Mexico/GUA_INER_IMSS_00864/2021 | EPI_ISL_2091315 | 14/04/21 | North America / Mexico / Guanajuato  | Human | Female | 40 | Ambulatory   | Nasopharyngeal and oropharyngeal swab |
| hCoV-19/Mexico/GUA_INER_IMSS_00865/2021 | EPI_ISL_2091316 | 15/04/21 | North America / Mexico / Guanajuato  | Human | Female | 53 | Ambulatory   | Nasopharyngeal and oropharyngeal swab |
| hCoV-19/Mexico/MIC_INER_IMSS_00868/2021 | EPI_ISL_2091319 | 16/04/21 | North America / Mexico / Michoacan   | Human | Female | 83 | Hospitalized | Nasopharyngeal and oropharyngeal swab |
| hCoV-19/Mexico/PUE_INER_IMSS_00869/2021 | EPI_ISL_2091320 | 06/04/21 | North America / Mexico / Puebla      | Human | Female | 31 | Ambulatory   | Oropharyngeal swab                    |
| hCoV-19/Mexico/PUE_INER_IMSS_00870/2021 | EPI_ISL_2091321 | 06/04/21 | North America / Mexico / Puebla      | Human | Male   | 35 | Ambulatory   | Nasopharyngeal and oropharyngeal swab |
| hCoV-19/Mexico/PUE_INER_IMSS_00871/2021 | EPI_ISL_2091322 | 06/04/21 | North America / Mexico / Puebla      | Human | Female | 32 | Ambulatory   | Nasopharyngeal and oropharyngeal swab |
| hCoV-19/Mexico/CMX_INER_IMSS_00872/2021 | EPI_ISL_2091323 | 09/04/21 | North America / Mexico / Mexico City | Human | Male   | 69 | Hospitalized | Nasopharyngeal and oropharyngeal swab |
| hCoV-19/Mexico/CMX_INER_IMSS_00873/2021 | EPI_ISL_2091324 | 08/04/21 | North America / Mexico / Mexico City | Human | Female | 54 | Ambulatory   | Nasopharyngeal and oropharyngeal swab |
| hCoV-19/Mexico/CMX_INER_IMSS_00874/2021 | EPI_ISL_2091325 | 08/04/21 | North America / Mexico / Mexico City | Human | Male   | 36 | Ambulatory   | Nasopharyngeal and oropharyngeal swab |

|                                         |                 |          |                                          |       |        |    |              |                                       |
|-----------------------------------------|-----------------|----------|------------------------------------------|-------|--------|----|--------------|---------------------------------------|
| hCoV-19/Mexico/CMX_INER_IMSS_00875/2021 | EPI_ISL_2091326 | 08/04/21 | North America / Mexico / Mexico City     | Human | Male   | 75 | Hospitalized | Nasopharyngeal and oropharyngeal swab |
| hCoV-19/Mexico/CMX_INER_IMSS_00876/2021 | EPI_ISL_2091327 | 08/04/21 | North America / Mexico / Mexico City     | Human | Female | 55 | Ambulatory   | Nasopharyngeal swab                   |
| hCoV-19/Mexico/CMX_INER_IMSS_00877/2021 | EPI_ISL_2091328 | 08/04/21 | North America / Mexico / Mexico City     | Human | Male   | 69 | Hospitalized | Nasopharyngeal swab                   |
| hCoV-19/Mexico/CMX_INER_IMSS_00879/2021 | EPI_ISL_2091330 | 08/04/21 | North America / Mexico / Mexico City     | Human | Male   | 47 | Hospitalized | Oropharyngeal swab                    |
| hCoV-19/Mexico/CMX_INER_IMSS_00880/2021 | EPI_ISL_2091331 | 09/04/21 | North America / Mexico / Mexico City     | Human | Female | 26 | Ambulatory   | Nasopharyngeal and oropharyngeal swab |
| hCoV-19/Mexico/MEX_INER_IMSS_00881/2021 | EPI_ISL_2091332 | 07/04/21 | North America / Mexico / State of Mexico | Human | Male   | 30 | Hospitalized | Oropharyngeal swab                    |
| hCoV-19/Mexico/AGU_INER_IMSS_00882/2021 | EPI_ISL_2091333 | 05/04/21 | North America / Mexico / Aguascalientes  | Human | Male   | 71 | Ambulatory   | Nasopharyngeal and oropharyngeal swab |
| hCoV-19/Mexico/AGU_INER_IMSS_00883/2021 | EPI_ISL_2091334 | 05/04/21 | North America / Mexico / Aguascalientes  | Human | Female | 29 | Ambulatory   | Nasopharyngeal and oropharyngeal swab |
| hCoV-19/Mexico/PUE_INER_IMSS_00885/2021 | EPI_ISL_2091335 | 07/04/21 | North America / Mexico / Puebla          | Human | Male   | 87 | Hospitalized | Nasopharyngeal and oropharyngeal swab |
| hCoV-19/Mexico/PUE_INER_IMSS_00886/2021 | EPI_ISL_2091336 | 07/04/21 | North America / Mexico / Puebla          | Human | Female | 52 | Hospitalized | Nasopharyngeal and oropharyngeal swab |
| hCoV-19/Mexico/PUE_INER_IMSS_00887/2021 | EPI_ISL_2091337 | 08/04/21 | North America / Mexico / Puebla          | Human | Male   | 30 | Ambulatory   | Nasopharyngeal swab                   |
| hCoV-19/Mexico/MEX_INER_IMSS_00888/2021 | EPI_ISL_2091338 | 09/04/21 | North America / Mexico / State of Mexico | Human | Male   | 64 | Hospitalized | Nasopharyngeal and oropharyngeal swab |
| hCoV-19/Mexico/PUE_INER_IMSS_00889/2021 | EPI_ISL_2091339 | 07/04/21 | North America / Mexico / Puebla          | Human | Male   | 59 | Ambulatory   | Nasopharyngeal and oropharyngeal swab |
| hCoV-19/Mexico/PUE_INER_IMSS_00891/2021 | EPI_ISL_2091340 | 08/04/21 | North America / Mexico / Puebla          | Human | Female | 47 | Ambulatory   | Nasopharyngeal and oropharyngeal swab |
| hCoV-19/Mexico/PUE_INER_IMSS_00892/2021 | EPI_ISL_2091341 | 08/04/21 | North America / Mexico / Puebla          | Human | Female | 31 | Ambulatory   | Nasopharyngeal and oropharyngeal swab |
| hCoV-19/Mexico/VER_INER_IMSS_00893/2021 | EPI_ISL_2091342 | 08/04/21 | North America / Mexico / Veracruz        | Human | Male   | 30 | Ambulatory   | Nasopharyngeal and oropharyngeal swab |
| hCoV-19/Mexico/CMX_INER_IMSS_00894/2021 | EPI_ISL_2091343 | 09/04/21 | North America / Mexico / Mexico City     | Human | Male   | 58 | Ambulatory   | Nasopharyngeal and oropharyngeal swab |
| hCoV-19/Mexico/CMX_INER_IMSS_00895/2021 | EPI_ISL_2091344 | 10/04/21 | North America / Mexico / Mexico City     | Human | Female | 88 | Hospitalized | Oropharyngeal swab                    |
| hCoV-19/Mexico/CMX_INER_IMSS_00896/2021 | EPI_ISL_2091345 | 10/04/21 | North America / Mexico / Mexico City     | Human | Male   | 83 | Hospitalized | Oropharyngeal swab                    |
| hCoV-19/Mexico/CMX_INER_IMSS_00897/2021 | EPI_ISL_2091346 | 10/04/21 | North America / Mexico / Mexico City     | Human | Female | 67 | Hospitalized | Oropharyngeal swab                    |
| hCoV-19/Mexico/CMX_INER_IMSS_00898/2021 | EPI_ISL_2091347 | 10/04/21 | North America / Mexico / Mexico City     | Human | Male   | 44 | Ambulatory   | Oropharyngeal swab                    |
| hCoV-19/Mexico/CMX_INER_IMSS_00899/2021 | EPI_ISL_2091348 | 08/04/21 | North America / Mexico / Mexico City     | Human | Male   | 42 | Ambulatory   | Nasopharyngeal and oropharyngeal swab |
| hCoV-19/Mexico/CMX_INER_IMSS_00900/2021 | EPI_ISL_2091349 | 12/04/21 | North America / Mexico / Mexico City     | Human | Male   | 68 | Hospitalized | Nasopharyngeal and oropharyngeal swab |
| hCoV-19/Mexico/CMX_INER_IMSS_00901/2021 | EPI_ISL_2091350 | 11/04/21 | North America / Mexico / Mexico City     | Human | Male   | 64 | Hospitalized | Nasopharyngeal and oropharyngeal swab |
| hCoV-19/Mexico/CMX_INER_IMSS_00902/2021 | EPI_ISL_2091351 | 10/04/21 | North America / Mexico / Mexico City     | Human | Male   | 68 | Ambulatory   | Nasopharyngeal and oropharyngeal swab |
| hCoV-19/Mexico/CMX_INER_IMSS_00903/2021 | EPI_ISL_2091352 | 10/04/21 | North America / Mexico / Mexico City     | Human | Female | 43 | Ambulatory   | Oropharyngeal swab                    |
| hCoV-19/Mexico/MEX_INER_IMSS_00904/2021 | EPI_ISL_2091353 | 12/04/21 | North America / Mexico / State of Mexico | Human | Female | 61 | Hospitalized | Nasopharyngeal and oropharyngeal swab |
| hCoV-19/Mexico/CMX_INER_IMSS_00905/2021 | EPI_ISL_2091354 | 08/04/21 | North America / Mexico / Mexico City     | Human | Female | 86 | Ambulatory   | Nasopharyngeal and oropharyngeal swab |
| hCoV-19/Mexico/CMX_INER_IMSS_00906/2021 | EPI_ISL_2091355 | 08/04/21 | North America / Mexico / Mexico City     | Human | Male   | 44 | Ambulatory   | Nasopharyngeal and oropharyngeal swab |
| hCoV-19/Mexico/CMX_INER_IMSS_00907/2021 | EPI_ISL_2091356 | 09/04/21 | North America / Mexico / Mexico City     | Human | Male   | 39 | Ambulatory   | Nasopharyngeal and oropharyngeal swab |
| hCoV-19/Mexico/CMX_INER_IMSS_00908/2021 | EPI_ISL_2091357 | 09/04/21 | North America / Mexico / Mexico City     | Human | Male   | 14 | Ambulatory   | Nasopharyngeal and oropharyngeal swab |
| hCoV-19/Mexico/CMX_INER_IMSS_00909/2021 | EPI_ISL_2091358 | 09/04/21 | North America / Mexico / Mexico City     | Human | Male   | 19 | Ambulatory   | Nasopharyngeal and oropharyngeal swab |
| hCoV-19/Mexico/CMX_INER_IMSS_00910/2021 | EPI_ISL_2091359 | 09/04/21 | North America / Mexico / Mexico City     | Human | Female | 43 | Ambulatory   | Nasopharyngeal and oropharyngeal swab |
| hCoV-19/Mexico/PUE_INER_IMSS_00911/2021 | EPI_ISL_2091360 | 09/04/21 | North America / Mexico / Puebla          | Human | Male   | 19 | Ambulatory   | Nasopharyngeal and oropharyngeal swab |
| hCoV-19/Mexico/PUE_INER_IMSS_00912/2021 | EPI_ISL_2091361 | 10/04/21 | North America / Mexico / Puebla          | Human | Female | 24 | Ambulatory   | Nasopharyngeal and oropharyngeal swab |
| hCoV-19/Mexico/CMX_INER_IMSS_00914/2021 | EPI_ISL_2091362 | 12/04/21 | North America / Mexico / Mexico City     | Human | Male   | 37 | Ambulatory   | Nasopharyngeal and oropharyngeal swab |
| hCoV-19/Mexico/CMX_INER_IMSS_00915/2021 | EPI_ISL_2091363 | 12/04/21 | North America / Mexico / Mexico City     | Human | Female | 74 | Hospitalized | Nasopharyngeal swab                   |
| hCoV-19/Mexico/CMX_INER_IMSS_00916/2021 | EPI_ISL_2091364 | 13/04/21 | North America / Mexico / Mexico City     | Human | Female | 73 | Hospitalized | Nasopharyngeal and oropharyngeal swab |
| hCoV-19/Mexico/CMX_INER_IMSS_00917/2021 | EPI_ISL_2091365 | 13/04/21 | North America / Mexico / Mexico City     | Human | Female | 59 | Hospitalized | Nasopharyngeal swab                   |
| hCoV-19/Mexico/CMX_INER_IMSS_00918/2021 | EPI_ISL_2091366 | 13/04/21 | North America / Mexico / Mexico City     | Human | Male   | 74 | Hospitalized | Nasopharyngeal swab                   |
| hCoV-19/Mexico/VER_INER_IMSS_00919/2021 | EPI_ISL_2091367 | 13/04/21 | North America / Mexico / Veracruz        | Human | Male   | 54 | Hospitalized | Nasopharyngeal and oropharyngeal swab |
| hCoV-19/Mexico/VER_INER_IMSS_00921/2021 | EPI_ISL_2091369 | 13/04/21 | North America / Mexico / Veracruz        | Human | Male   | 16 | Ambulatory   | Nasopharyngeal and oropharyngeal swab |
| hCoV-19/Mexico/PUE_INER_IMSS_00922/2021 | EPI_ISL_2091370 | 13/04/21 | North America / Mexico / Puebla          | Human | Female | 27 | Hospitalized | Nasopharyngeal and oropharyngeal swab |
| hCoV-19/Mexico/PUE_INER_IMSS_00926/2021 | EPI_ISL_2091371 | 13/04/21 | North America / Mexico / Puebla          | Human | Male   | 29 | Hospitalized | Nasopharyngeal and oropharyngeal swab |



|                                         |                 |          |                                          |       |        |    |              |                                       |
|-----------------------------------------|-----------------|----------|------------------------------------------|-------|--------|----|--------------|---------------------------------------|
| hCoV-19/Mexico/PUE_INER_IMSS_00927/2021 | EPI_ISL_2091372 | 13/04/21 | North America / Mexico / Puebla          | Human | Male   | 46 | Hospitalized | Nasopharyngeal and oropharyngeal swab |
| hCoV-19/Mexico/PUE_INER_IMSS_00928/2021 | EPI_ISL_2091373 | 12/04/21 | North America / Mexico / Puebla          | Human | Female | 22 | Ambulatory   | Oropharyngeal swab                    |
| hCoV-19/Mexico/PUE_INER_IMSS_00929/2021 | EPI_ISL_2091374 | 13/04/21 | North America / Mexico / Puebla          | Human | Female | 29 | Ambulatory   | Oropharyngeal swab                    |
| hCoV-19/Mexico/PUE_INER_IMSS_00930/2021 | EPI_ISL_2091375 | 12/04/21 | North America / Mexico / Puebla          | Human | Female | 42 | Ambulatory   | Nasopharyngeal and oropharyngeal swab |
| hCoV-19/Mexico/PUE_INER_IMSS_00931/2021 | EPI_ISL_2091376 | 12/04/21 | North America / Mexico / Puebla          | Human | Male   | 41 | Ambulatory   | Nasopharyngeal swab                   |
| hCoV-19/Mexico/MEX_INER_IMSS_00932/2021 | EPI_ISL_2091377 | 12/04/21 | North America / Mexico / State of Mexico | Human | Female | 29 | Ambulatory   | Nasopharyngeal and oropharyngeal swab |
| hCoV-19/Mexico/SLP_INER_IMSS_00933/2021 | EPI_ISL_2091378 | 12/04/21 | North America / Mexico / San Luis Potosi | Human | Female | 62 | Hospitalized | Nasopharyngeal and oropharyngeal swab |
| hCoV-19/Mexico/SLP_INER_IMSS_00934/2021 | EPI_ISL_2091379 | 12/04/21 | North America / Mexico / San Luis Potosi | Human | Female | 66 | Hospitalized | Nasopharyngeal and oropharyngeal swab |
| hCoV-19/Mexico/CMX_INER_IMSS_00936/2021 | EPI_ISL_2091381 | 13/04/21 | North America / Mexico / Mexico City     | Human | Female | 56 | Ambulatory   | Nasopharyngeal and oropharyngeal swab |
| hCoV-19/Mexico/CMX_INER_IMSS_00937/2021 | EPI_ISL_2091382 | 14/04/21 | North America / Mexico / Mexico City     | Human | Female | 61 | Hospitalized | Nasopharyngeal and oropharyngeal swab |
| hCoV-19/Mexico/CMX_INER_IMSS_00938/2021 | EPI_ISL_2091383 | 14/04/21 | North America / Mexico / Mexico City     | Human | Female | 64 | Hospitalized | Nasopharyngeal and oropharyngeal swab |
| hCoV-19/Mexico/MEX_INER_IMSS_00939/2021 | EPI_ISL_2091384 | 12/04/21 | North America / Mexico / State of Mexico | Human | Female | 56 | Ambulatory   | Oropharyngeal swab                    |
| hCoV-19/Mexico/MEX_INER_IMSS_00941/2021 | EPI_ISL_2091385 | 14/04/21 | North America / Mexico / State of Mexico | Human | Male   | 33 | Ambulatory   | Oropharyngeal swab                    |
| hCoV-19/Mexico/MEX_INER_IMSS_00942/2021 | EPI_ISL_2091386 | 13/04/21 | North America / Mexico / State of Mexico | Human | Female | 66 | Ambulatory   | Oropharyngeal swab                    |
| hCoV-19/Mexico/MEX_INER_IMSS_00943/2021 | EPI_ISL_2091387 | 13/04/21 | North America / Mexico / State of Mexico | Human | Female | 49 | Ambulatory   | Oropharyngeal swab                    |
| hCoV-19/Mexico/MEX_INER_IMSS_00944/2021 | EPI_ISL_2091388 | 13/04/21 | North America / Mexico / State of Mexico | Human | Male   | 58 | Ambulatory   | Oropharyngeal swab                    |
| hCoV-19/Mexico/MOR_INER_IMSS_00945/2021 | EPI_ISL_2091389 | 14/04/21 | North America / Mexico / Morelos         | Human | Male   | 85 | Hospitalized | Nasopharyngeal and oropharyngeal swab |
| hCoV-19/Mexico/MOR_INER_IMSS_00946/2021 | EPI_ISL_2091390 | 14/04/21 | North America / Mexico / Morelos         | Human | Female | 52 | Hospitalized | Nasopharyngeal and oropharyngeal swab |
| hCoV-19/Mexico/CHP_INER_IMSS_00947/2021 | EPI_ISL_2091391 | 13/04/21 | North America / Mexico / Chiapas         | Human | Female | 51 | Ambulatory   | Nasopharyngeal and oropharyngeal swab |
| hCoV-19/Mexico/PUE_INER_IMSS_00948/2021 | EPI_ISL_2091392 | 14/04/21 | North America / Mexico / Puebla          | Human | Male   | 55 | Hospitalized | Nasopharyngeal and oropharyngeal swab |
| hCoV-19/Mexico/PUE_INER_IMSS_00949/2021 | EPI_ISL_2091393 | 14/04/21 | North America / Mexico / Puebla          | Human | Male   | 35 | Hospitalized | Nasopharyngeal and oropharyngeal swab |
| hCoV-19/Mexico/PUE_INER_IMSS_00950/2021 | EPI_ISL_2091394 | 14/04/21 | North America / Mexico / Puebla          | Human | Male   | 54 | Hospitalized | Nasopharyngeal and oropharyngeal swab |
| hCoV-19/Mexico/PUE_INER_IMSS_00951/2021 | EPI_ISL_2091395 | 14/04/21 | North America / Mexico / Puebla          | Human | Female | 55 | Hospitalized | Nasopharyngeal and oropharyngeal swab |
| hCoV-19/Mexico/PUE_INER_IMSS_00953/2021 | EPI_ISL_2091396 | 14/04/21 | North America / Mexico / Puebla          | Human | Male   | 30 | Hospitalized | Nasopharyngeal and oropharyngeal swab |
| hCoV-19/Mexico/PUE_INER_IMSS_00955/2021 | EPI_ISL_2091397 | 12/04/21 | North America / Mexico / Puebla          | Human | Female | 13 | Ambulatory   | Oropharyngeal swab                    |
| hCoV-19/Mexico/PUE_INER_IMSS_00956/2021 | EPI_ISL_2091398 | 13/04/21 | North America / Mexico / Puebla          | Human | Female | 50 | Ambulatory   | Oropharyngeal swab                    |
| hCoV-19/Mexico/PUE_INER_IMSS_00957/2021 | EPI_ISL_2091399 | 13/04/21 | North America / Mexico / Puebla          | Human | Female | 30 | Ambulatory   | Nasopharyngeal and oropharyngeal swab |
| hCoV-19/Mexico/PUE_INER_IMSS_00959/2021 | EPI_ISL_2091400 | 14/04/21 | North America / Mexico / Puebla          | Human | Male   | 53 | Ambulatory   | Nasopharyngeal and oropharyngeal swab |
| hCoV-19/Mexico/PUE_INER_IMSS_00960/2021 | EPI_ISL_2091401 | 14/04/21 | North America / Mexico / Puebla          | Human | Female | 28 | Ambulatory   | Oropharyngeal swab                    |
| hCoV-19/Mexico/PUE_INER_IMSS_00961/2021 | EPI_ISL_2091402 | 13/04/21 | North America / Mexico / Puebla          | Human | Female | 28 | Ambulatory   | Oropharyngeal swab                    |
| hCoV-19/Mexico/PUE_INER_IMSS_00962/2021 | EPI_ISL_2091403 | 13/04/21 | North America / Mexico / Puebla          | Human | Female | 26 | Ambulatory   | Oropharyngeal swab                    |
| hCoV-19/Mexico/MEX_INER_IMSS_00964/2021 | EPI_ISL_2091405 | 15/04/21 | North America / Mexico / State of Mexico | Human | Male   | 34 | Ambulatory   | Nasopharyngeal and oropharyngeal swab |
| hCoV-19/Mexico/VER_INER_IMSS_00965/2021 | EPI_ISL_2091406 | 14/04/21 | North America / Mexico / Veracruz        | Human | Female | 37 | Ambulatory   | Nasopharyngeal and oropharyngeal swab |
| hCoV-19/Mexico/CMX_INER_IMSS_00967/2021 | EPI_ISL_2091408 | 16/04/21 | North America / Mexico / Mexico City     | Human | Male   | 58 | Ambulatory   | Nasopharyngeal swab                   |
| hCoV-19/Mexico/MEX_INER_IMSS_00968/2021 | EPI_ISL_2091409 | 16/04/21 | North America / Mexico / State of Mexico | Human | Male   | 55 | Ambulatory   | Nasopharyngeal swab                   |
| hCoV-19/Mexico/MEX_INER_IMSS_00971/2021 | EPI_ISL_2091411 | 14/04/21 | North America / Mexico / State of Mexico | Human | Female | 31 | Ambulatory   | Nasopharyngeal and oropharyngeal swab |
| hCoV-19/Mexico/CMX_INER_IMSS_00972/2021 | EPI_ISL_2091412 | 15/04/21 | North America / Mexico / Mexico City     | Human | Male   | 60 | Ambulatory   | Nasopharyngeal and oropharyngeal swab |
| hCoV-19/Mexico/CMX_INER_IMSS_00973/2021 | EPI_ISL_2091413 | 04/04/21 | North America / Mexico / Mexico City     | Human | Female | 74 | Hospitalized | Nasopharyngeal and oropharyngeal swab |
| hCoV-19/Mexico/HID_INER_IMSS_00974/2021 | EPI_ISL_2091414 | 14/04/21 | North America / Mexico / Hidalgo         | Human | Male   | 39 | Ambulatory   | Nasopharyngeal and oropharyngeal swab |
| hCoV-19/Mexico/CMX_INER_IMSS_00975/2021 | EPI_ISL_2091415 | 16/04/21 | North America / Mexico / Mexico City     | Human | Male   | 2  | Ambulatory   | Nasopharyngeal and oropharyngeal swab |
| hCoV-19/Mexico/CMX_INER_IMSS_00976/2021 | EPI_ISL_2091416 | 15/04/21 | North America / Mexico / Mexico City     | Human | Male   | 52 | Hospitalized | Oropharyngeal swab                    |
| hCoV-19/Mexico/CMX_INER_IMSS_00977/2021 | EPI_ISL_2091417 | 16/04/21 | North America / Mexico / Mexico City     | Human | Male   | 60 | Ambulatory   | Oropharyngeal swab                    |
| hCoV-19/Mexico/CMX_INER_IMSS_00978/2021 | EPI_ISL_2091418 | 16/04/21 | North America / Mexico / Mexico City     | Human | Male   | 71 | Ambulatory   | Oropharyngeal swab                    |
| hCoV-19/Mexico/CMX_INER_IMSS_00981/2021 | EPI_ISL_2091421 | 15/04/21 | North America / Mexico / Mexico City     | Human | Male   | 51 | Hospitalized | Nasopharyngeal and oropharyngeal swab |

|                                              |                 |          |                                          |       |        |    |               |                                            |
|----------------------------------------------|-----------------|----------|------------------------------------------|-------|--------|----|---------------|--------------------------------------------|
| hCoV-19/Mexico/MEX_INER_IMSS_00983/2021      | EPI_ISL_2091422 | 15/04/21 | North America / Mexico / State of Mexico | Human | Male   | 83 | Hospitalized  | Nasopharyngeal and oropharyngeal swab      |
| hCoV-19/Mexico/MEX_INER_IMSS_00985/2021      | EPI_ISL_2091424 | 16/04/21 | North America / Mexico / State of Mexico | Human | Male   | 46 | Ambulatory    | Nasopharyngeal and oropharyngeal swab      |
| hCoV-19/Mexico/PUE_INER_IMSS_00986/2021      | EPI_ISL_2091425 | 11/04/21 | North America / Mexico / Puebla          | Human | Male   | 29 | Ambulatory    | Nasopharyngeal and oropharyngeal swab      |
| hCoV-19/Mexico/OAX_INER_IMSS_00987/2021      | EPI_ISL_2091426 | 15/04/21 | North America / Mexico / Oaxaca          | Human | Male   | 67 | Hospitalized  | Nasopharyngeal and oropharyngeal swab      |
| hCoV-19/Mexico/GRO_INER_IMSS_00988/2021      | EPI_ISL_2091427 | 14/04/21 | North America / Mexico / Guerrero        | Human | Male   | 51 | Hospitalized  | Oropharyngeal swab                         |
| hCoV-19/Mexico/MEX_INER_IMSS_00989/2021      | EPI_ISL_2091428 | 12/04/21 | North America / Mexico / State of Mexico | Human | Female | 59 | Hospitalized  | Nasopharyngeal and oropharyngeal swab      |
| hCoV-19/Mexico/MEX_INER_IMSS_00990/2021      | EPI_ISL_2091429 | 10/04/21 | North America / Mexico / State of Mexico | Human | Female | 49 | Hospitalized  | Nasopharyngeal and oropharyngeal swab      |
| hCoV-19/Mexico/CMX_INER_IMSS_00991/2021      | EPI_ISL_2091430 | 16/04/21 | North America / Mexico / Mexico City     | Human | Male   | 62 | Hospitalized  | Oropharyngeal swab                         |
| hCoV-19/Mexico/CMX_INER_IMSS_00992/2021      | EPI_ISL_2091431 | 15/04/21 | North America / Mexico / Mexico City     | Human | Female | 30 | Ambulatory    | Nasopharyngeal and oropharyngeal swab      |
| hCoV-19/Mexico/OAX_INER_IMSS_00994/2021      | EPI_ISL_2091433 | 14/04/21 | North America / Mexico / Oaxaca          | Human | Female | 26 | Ambulatory    | Nasopharyngeal and oropharyngeal swab      |
| hCoV-19/Mexico/CMX_INER_IMSS_00996/2021      | EPI_ISL_2091435 | 17/04/21 | North America / Mexico / Mexico City     | Human | Female | 87 | Hospitalized  | Nasopharyngeal swab                        |
| hCoV-19/Mexico/CMX_INER_IMSS_00997/2021      | EPI_ISL_2091436 | 16/04/21 | North America / Mexico / Mexico City     | Human | Male   | 59 | Hospitalized  | Nasopharyngeal swab                        |
| hCoV-19/Mexico/MEX_INER_IMSS_00998/2021      | EPI_ISL_2091437 | 17/04/21 | North America / Mexico / State of Mexico | Human | Male   | 54 | Hospitalized  | Oropharyngeal swab                         |
| hCoV-19/Mexico/CMX_INER_IMSS_00999/2021      | EPI_ISL_2091438 | 18/04/21 | North America / Mexico / Mexico City     | Human | Female | 50 | Hospitalized  | Nasopharyngeal and oropharyngeal swab      |
| hCoV-19/Mexico/CMX_INER_IMSS_01000/2021      | EPI_ISL_2091439 | 17/04/21 | North America / Mexico / Mexico City     | Human | Male   | 48 | Ambulatory    | Oropharyngeal swab                         |
| hCoV-19/Mexico/CMX_INER_IMSS_01001/2021      | EPI_ISL_2091440 | 18/04/21 | North America / Mexico / Mexico City     | Human | Female | 67 | Hospitalized  | Nasopharyngeal swab                        |
| hCoV-19/Mexico/MEX_INER_IMSS_01002/2021      | EPI_ISL_2091441 | 27/03/21 | North America / Mexico / State of Mexico | Human | Male   | 49 | Hospitalized  | Nasopharyngeal and oropharyngeal swab      |
| hCoV-19/Mexico/CMX_INER_IMSS_01003/2021      | EPI_ISL_2091442 | 16/04/21 | North America / Mexico / Mexico City     | Human | Male   | 59 | Hospitalized  | Nasopharyngeal and oropharyngeal swab      |
| hCoV-19/Mexico/MEX_INER_IMSS_01004/2021      | EPI_ISL_2091443 | 17/04/21 | North America / Mexico / State of Mexico | Human | Male   | 95 | Hospitalized  | Nasopharyngeal and oropharyngeal swab      |
| hCoV-19/Mexico/CMX_INER_IMSS_01005/2021      | EPI_ISL_2091444 | 17/04/21 | North America / Mexico / Mexico City     | Human | Female | 41 | Ambulatory    | Nasopharyngeal and oropharyngeal swab      |
| hCoV-19/Mexico/MEX_INER_IMSS_01006/2021      | EPI_ISL_2091445 | 16/04/21 | North America / Mexico / State of Mexico | Human | Female | 39 | Hospitalized  | Nasopharyngeal and oropharyngeal swab      |
| hCoV-19/Mexico/MEX_INER_IMSS_01007/2021      | EPI_ISL_2091446 | 18/04/21 | North America / Mexico / State of Mexico | Human | Female | 55 | Hospitalized  | Nasopharyngeal and oropharyngeal swab      |
| hCoV-19/Mexico/VER_INER_IMSS_01008/2021      | EPI_ISL_2091447 | 15/04/21 | North America / Mexico / Veracruz        | Human | Male   | 30 | Ambulatory    | Nasopharyngeal and oropharyngeal swab      |
| hCoV-19/Mexico/VER_INER_IMSS_01009/2021      | EPI_ISL_2091448 | 15/04/21 | North America / Mexico / Veracruz        | Human | Female | 55 | Ambulatory    | Nasopharyngeal and oropharyngeal swab      |
| hCoV-19/Mexico/CMX_INER_IMSS_01011/2021      | EPI_ISL_2091450 | 16/04/21 | North America / Mexico / Mexico City     | Human | Male   | 56 | Ambulatory    | Nasopharyngeal and oropharyngeal swab      |
| hCoV-19/Mexico/CMX_INER_IMSS_01012/2021      | EPI_ISL_2091451 | 16/04/21 | North America / Mexico / Mexico City     | Human | Female | 66 | Ambulatory    | Nasopharyngeal and oropharyngeal swab      |
| hCoV-19/Mexico/CMX_INER_IMSS_01013/2021      | EPI_ISL_2091452 | 16/04/21 | North America / Mexico / Mexico City     | Human | Female | 37 | Ambulatory    | Nasopharyngeal swab                        |
| hCoV-19/Mexico/MEX_INER_IMSS_01014/2021      | EPI_ISL_2091453 | 17/04/21 | North America / Mexico / State of Mexico | Human | Male   | 28 | Hospitalized  | Nasopharyngeal and oropharyngeal swab      |
| hCoV-19/Mexico/CMX_INER_IMSS_01015/2021      | EPI_ISL_2091454 | 16/04/21 | North America / Mexico / Mexico City     | Human | Female | 44 | Ambulatory    | Nasopharyngeal and oropharyngeal swab      |
| hCoV-19/Mexico/CMX_INER_IMSS_01016/2021      | EPI_ISL_2091455 | 19/04/21 | North America / Mexico / Mexico City     | Human | Female | 72 | Ambulatory    | Oropharyngeal swab                         |
| hCoV-19/Mexico/CMX_INER_IMSS_01017/2021      | EPI_ISL_2091456 | 18/04/21 | North America / Mexico / Mexico City     | Human | Male   | 61 | Hospitalized  | Nasopharyngeal and oropharyngeal swab      |
| hCoV-19/Mexico/NLE-LESP NL-20210512-402/2021 | EPI_ISL_2102600 | 28/04/21 | North America / Mexico / Nuevo Leon      | Human | Female | 65 | ent - Home    | Morpharyngeal and/or nasopharyngeal exuda  |
| hCoV-19/Mexico/NLE-LESP NL-20210512-416/2021 | EPI_ISL_2102611 | 07/05/21 | North America / Mexico / Nuevo Leon      | Human | Female | 56 | zed - Non-Ser | icopharyngeal and/or nasopharyngeal exuda  |
| hCoV-19/Mexico/NLE-LESP NL-20210512-426/2021 | EPI_ISL_2102621 | 04/05/21 | North America / Mexico / Nuevo Leon      | Human | Female | 22 | ent - Home    | Morpharyngeal and/or nasopharyngeal exuda  |
| hCoV-19/Mexico/NLE-LESP NL-20210512-434/2021 | EPI_ISL_2102629 | 06/05/21 | North America / Mexico / Nuevo Leon      | Human | Male   | 27 | ent - Home    | Morpharyngeal and/or nasopharyngeal exuda  |
| hCoV-19/Mexico/NLE-LESP NL-20210512-457/2021 | EPI_ISL_2102649 | 03/05/21 | North America / Mexico / Nuevo Leon      | Human | Female | 55 | ent - Home    | Morpharyngeal and/or nasopharyngeal exuda  |
| hCoV-19/Mexico/NLE-LESP NL-20210512-471/2021 | EPI_ISL_2102660 | 29/04/21 | North America / Mexico / Nuevo Leon      | Human | Female | 47 | tory - Under  | Trropharyngeal and/or nasopharyngeal exuda |
| hCoV-19/Mexico/NLE-LESP NL-20210512-491/2021 | EPI_ISL_2102677 | 30/04/21 | North America / Mexico / Nuevo Leon      | Human | Female | 64 | ent - Home    | Morpharyngeal and/or nasopharyngeal exuda  |
| hCoV-19/Mexico/CMX-INMEGEN-05-01-189/2021    | EPI_ISL_2105721 | 06/05/21 | North America / Mexico / Mexico City     | Human | Male   | 58 | unknown       | Oropharyngeal swab                         |
| hCoV-19/Mexico/CMX-INMEGEN-05-01-191/2021    | EPI_ISL_2105722 | 06/05/21 | North America / Mexico / Mexico City     | Human | Male   | 59 | unknown       | Oropharyngeal swab                         |
| hCoV-19/Mexico/CMX-INMEGEN-05-01-204/2021    | EPI_ISL_2105725 | 31/03/21 | North America / Mexico / Mexico City     | Human | Male   | 29 | unknown       | Oropharyngeal swab                         |
| hCoV-19/Mexico/CMX-INMEGEN-05-01-205/2021    | EPI_ISL_2105726 | 06/04/21 | North America / Mexico / Mexico City     | Human | Female | 29 | unknown       | Oropharyngeal swab                         |
| hCoV-19/Mexico/CMX-INMEGEN-05-01-207/2021    | EPI_ISL_2105728 | 05/04/21 | North America / Mexico / Mexico City     | Human | Male   | 29 | unknown       | Oropharyngeal swab                         |
| hCoV-19/Mexico/CMX-INMEGEN-05-01-208/2021    | EPI_ISL_2105729 | 17/04/21 | North America / Mexico / Mexico City     | Human | Female | 29 | unknown       | Oropharyngeal swab                         |





|                                             |                 |          |                                          |       |        |    |              |                    |
|---------------------------------------------|-----------------|----------|------------------------------------------|-------|--------|----|--------------|--------------------|
| hCoV-19/Mexico/MEX-INMEGEN-05-01-359/2021   | EPI_ISL_2105861 | 03/05/21 | North America / Mexico / State of Mexico | Human | Female | 50 | unknown      | Oropharyngeal swab |
| hCoV-19/Mexico/MEX-INMEGEN-05-01-361/2021   | EPI_ISL_2105862 | 03/05/21 | North America / Mexico / State of Mexico | Human | Male   | 39 | unknown      | Oropharyngeal swab |
| hCoV-19/Mexico/MEX-INMEGEN-05-01-362/2021   | EPI_ISL_2105863 | 03/05/21 | North America / Mexico / State of Mexico | Human | Male   | 33 | unknown      | Oropharyngeal swab |
| hCoV-19/Mexico/MEX-INMEGEN-05-01-363/2021   | EPI_ISL_2105864 | 03/05/21 | North America / Mexico / State of Mexico | Human | Male   | 18 | unknown      | Oropharyngeal swab |
| hCoV-19/Mexico/MEX-INMEGEN-05-01-364/2021   | EPI_ISL_2105865 | 03/05/21 | North America / Mexico / State of Mexico | Human | Female | 78 | unknown      | Oropharyngeal swab |
| hCoV-19/Mexico/MEX-INMEGEN-05-01-365/2021   | EPI_ISL_2105866 | 03/05/21 | North America / Mexico / State of Mexico | Human | Female | 32 | unknown      | Oropharyngeal swab |
| hCoV-19/Mexico/MEX-INMEGEN-05-01-369/2021   | EPI_ISL_2105868 | 03/05/21 | North America / Mexico / State of Mexico | Human | Male   | 23 | unknown      | Oropharyngeal swab |
| hCoV-19/Mexico/CMX-INMEGEN-05-01-370/2021   | EPI_ISL_2105869 | 03/05/21 | North America / Mexico / Mexico City     | Human | Male   | 36 | unknown      | Oropharyngeal swab |
| hCoV-19/Mexico/CMX-INMEGEN-05-01-371/2021   | EPI_ISL_2105870 | 03/05/21 | North America / Mexico / Mexico City     | Human | Male   | 39 | unknown      | Oropharyngeal swab |
| hCoV-19/Mexico/CMX-INMEGEN-05-01-373/2021   | EPI_ISL_2105872 | 03/05/21 | North America / Mexico / Mexico City     | Human | Male   | 42 | unknown      | Oropharyngeal swab |
| hCoV-19/Mexico/CMX-INMEGEN-05-01-375/2021   | EPI_ISL_2105873 | 03/05/21 | North America / Mexico / Mexico City     | Human | Female | 34 | unknown      | Oropharyngeal swab |
| hCoV-19/Mexico/CMX-INMEGEN-05-01-376/2021   | EPI_ISL_2105874 | 03/05/21 | North America / Mexico / Mexico City     | Human | Male   | 57 | unknown      | Oropharyngeal swab |
| CoV-19/Mexico/NLE-InDRE_FB13354_S1828/2021  | EPI_ISL_2157310 | 14/04/21 | North America / Mexico / Nuevo Leon      | Human | Female | 16 | Released     | Oropharyngeal swab |
| CoV-19/Mexico/QUE-InDRE_FB13490_S1830/2021  | EPI_ISL_2157311 | 15/04/21 | North America / Mexico / Queretaro       | Human | Male   | 47 | Released     | Oropharyngeal swab |
| CoV-19/Mexico/QUE-InDRE_FB13497_S1833/2021  | EPI_ISL_2157314 | 19/04/21 | North America / Mexico / Queretaro       | Human | Female | 83 | Hospitalized | Oropharyngeal swab |
| CoV-19/Mexico/MOR-InDRE_FB13653_S1834/2021  | EPI_ISL_2157315 | 15/04/21 | North America / Mexico / Morelos         | Human | Male   | 54 | Hospitalized | Oropharyngeal swab |
| CoV-19/Mexico/CHH-InDRE_FB13673_S1835/2021  | EPI_ISL_2157316 | 14/04/21 | North America / Mexico / Chihuahua       | Human | Male   | 60 | Released     | Oropharyngeal swab |
| CoV-19/Mexico/CHH-InDRE_FB13684_S1837/2021  | EPI_ISL_2157318 | 08/04/21 | North America / Mexico / Chihuahua       | Human | Female | 56 | Hospitalized | Oropharyngeal swab |
| CoV-19/Mexico/COA-InDRE_FB13708_S1839/2021  | EPI_ISL_2157319 | 17/04/21 | North America / Mexico / Coahuila        | Human | Male   | 61 | Released     | Oropharyngeal swab |
| CoV-19/Mexico/ROO-InDRE_FB13728_S1840/2021  | EPI_ISL_2157320 | 17/04/21 | North America / Mexico / Quintana Roo    | Human | Female | 60 | Released     | Oropharyngeal swab |
| CoV-19/Mexico/CHH-InDRE_FB13824_S1844/2021  | EPI_ISL_2157322 | 21/04/21 | North America / Mexico / Chihuahua       | Human | Female | 44 | Released     | Oropharyngeal swab |
| CoV-19/Mexico/GUA-InDRE_FB13892_S1849/2021  | EPI_ISL_2157326 | 20/04/21 | North America / Mexico / Guanajuato      | Human | Female | 9  | Released     | Oropharyngeal swab |
| CoV-19/Mexico/CAM-InDRE_FB14063_S1852/2021  | EPI_ISL_2157327 | 22/04/21 | North America / Mexico / Campeche        | Human | Male   | 63 | Deceased     | Oropharyngeal swab |
| CoV-19/Mexico/BCN-InDRE_FB14106_S1853/2021  | EPI_ISL_2157328 | 21/04/21 | North America / Mexico / Baja California | Human | Female | 74 | Released     | Oropharyngeal swab |
| CoV-19/Mexico/GRO-InDRE_FB14110_S1854/2021  | EPI_ISL_2157329 | 20/04/21 | North America / Mexico / Guerrero        | Human | Male   | 86 | Hospitalized | Oropharyngeal swab |
| CoV-19/Mexico/GRO-InDRE_FB14109_S1855/2021  | EPI_ISL_2157330 | 21/04/21 | North America / Mexico / Guerrero        | Human | Male   | 80 | Deceased     | Oropharyngeal swab |
| CoV-19/Mexico/BCN-InDRE_FB13335_S1864/2021  | EPI_ISL_2158108 | 13/04/21 | North America / Mexico / Baja California | Human | Female | 66 | Released     | Oropharyngeal swab |
| CoV-19/Mexico/NLE-InDRE_FB13343_S1865/2021  | EPI_ISL_2158109 | 12/04/21 | North America / Mexico / Nuevo Leon      | Human | Female | 77 | Hospitalized | Oropharyngeal swab |
| CoV-19/Mexico/NLE-InDRE_FB13344_S1866/2021  | EPI_ISL_2158110 | 13/04/21 | North America / Mexico / Nuevo Leon      | Human | Male   | 36 | Hospitalized | Oropharyngeal swab |
| CoV-19/Mexico/NLE-InDRE_FB13345_S1867/2021  | EPI_ISL_2158111 | 13/04/21 | North America / Mexico / Nuevo Leon      | Human | Female | 40 | Hospitalized | Oropharyngeal swab |
| CoV-19/Mexico/NLE-InDRE_FB13346_S1868/2021  | EPI_ISL_2158112 | 13/04/21 | North America / Mexico / Nuevo Leon      | Human | Male   | 40 | Hospitalized | Oropharyngeal swab |
| CoV-19/Mexico/NLE-InDRE_FB13347_S1869/2021  | EPI_ISL_2158113 | 13/04/21 | North America / Mexico / Nuevo Leon      | Human | Female | 83 | Hospitalized | Oropharyngeal swab |
| CoV-19/Mexico/TAM-InDRE_FB13348_S1870/2021  | EPI_ISL_2158114 | 13/04/21 | North America / Mexico / Tamaulipas      | Human | Female | 64 | Hospitalized | Oropharyngeal swab |
| CoV-19/Mexico/NLE-InDRE_FB13349_S1871/2021  | EPI_ISL_2158115 | 14/04/21 | North America / Mexico / Nuevo Leon      | Human | Male   | 47 | Hospitalized | Oropharyngeal swab |
| CoV-19/Mexico/NLE-InDRE_FB13351_S1872/2021  | EPI_ISL_2158116 | 12/04/21 | North America / Mexico / Nuevo Leon      | Human | Female | 65 | Released     | Oropharyngeal swab |
| CoV-19/Mexico/NLE-InDRE_FB13352_S1873/2021  | EPI_ISL_2158117 | 13/04/21 | North America / Mexico / Nuevo Leon      | Human | Male   | 53 | Released     | Oropharyngeal swab |
| CoV-19/Mexico/NLE-InDRE_FB13353_S1874/2021  | EPI_ISL_2158118 | 13/04/21 | North America / Mexico / Nuevo Leon      | Human | Female | 63 | Released     | Oropharyngeal swab |
| CoV-19/Mexico/NLE-InDRE_FB13356_S1876/2021  | EPI_ISL_2158119 | 14/04/21 | North America / Mexico / Nuevo Leon      | Human | Male   | 58 | Released     | Oropharyngeal swab |
| CoV-19/Mexico/NLE-InDRE_FB13357_S1877/2021  | EPI_ISL_2158120 | 12/04/21 | North America / Mexico / Nuevo Leon      | Human | Female | 35 | Released     | Oropharyngeal swab |
| hCoV-19/Mexico/HID-InDRE_FB13359_S1878/2021 | EPI_ISL_2158121 | 13/04/21 | North America / Mexico / Hidalgo         | Human | Female | 51 | Hospitalized | Oropharyngeal swab |
| hCoV-19/Mexico/HID-InDRE_FB13360_S1879/2021 | EPI_ISL_2158122 | 13/04/21 | North America / Mexico / Hidalgo         | Human | Male   | 61 | Hospitalized | Oropharyngeal swab |
| hCoV-19/Mexico/HID-InDRE_FB13361_S1880/2021 | EPI_ISL_2158123 | 15/04/21 | North America / Mexico / Hidalgo         | Human | Male   | 43 | Hospitalized | Oropharyngeal swab |
| hCoV-19/Mexico/HID-InDRE_FB13362_S1881/2021 | EPI_ISL_2158124 | 16/04/21 | North America / Mexico / Hidalgo         | Human | Male   | 82 | Hospitalized | Oropharyngeal swab |
| hCoV-19/Mexico/HID-InDRE_FB13363_S1882/2021 | EPI_ISL_2158125 | 12/04/21 | North America / Mexico / Hidalgo         | Human | Male   | 19 | Released     | Oropharyngeal swab |

|                                                            |          |                                      |       |        |    |              |                    |
|------------------------------------------------------------|----------|--------------------------------------|-------|--------|----|--------------|--------------------|
| hCoV-19/Mexico/HID-IndRE_FB13364_S1883/2021EPI_ISL_2158126 | 13/04/21 | North America / Mexico / Hidalgo     | Human | Female | 37 | Released     | Oropharyngeal swab |
| hCoV-19/Mexico/HID-IndRE_FB13366_S1884/2021EPI_ISL_2158127 | 17/04/21 | North America / Mexico / Hidalgo     | Human | Male   | 67 | Released     | Oropharyngeal swab |
| hCoV-19/Mexico/PUE-IndRE_FB13369_S1885/2021EPI_ISL_2158128 | 14/04/21 | North America / Mexico / Puebla      | Human | Male   | 81 | Hospitalized | Oropharyngeal swab |
| hCoV-19/Mexico/PUE-IndRE_FB13370_S1886/2021EPI_ISL_2158129 | 15/04/21 | North America / Mexico / Puebla      | Human | Male   | 38 | Hospitalized | Oropharyngeal swab |
| hCoV-19/Mexico/PUE-IndRE_FB13371_S1887/2021EPI_ISL_2158130 | 16/04/21 | North America / Mexico / Puebla      | Human | Male   | 66 | Deceased     | Oropharyngeal swab |
| hCoV-19/Mexico/TLA-IndRE_FB13373_S1888/2021EPI_ISL_2158131 | 17/04/21 | North America / Mexico / Tlaxcala    | Human | Female | 57 | Hospitalized | Oropharyngeal swab |
| hCoV-19/Mexico/GUA-IndRE_FB13374_S1889/2021EPI_ISL_2158132 | 10/04/21 | North America / Mexico / Guanajuato  | Human | Male   | 59 | Hospitalized | Oropharyngeal swab |
| hCoV-19/Mexico/GUA-IndRE_FB13376_S1890/2021EPI_ISL_2158133 | 10/04/21 | North America / Mexico / Guanajuato  | Human | Female | 76 | Deceased     | Oropharyngeal swab |
| hCoV-19/Mexico/GUA-IndRE_FB13377_S1891/2021EPI_ISL_2158134 | 12/04/21 | North America / Mexico / Guanajuato  | Human | Female | 2  | Hospitalized | Oropharyngeal swab |
| hCoV-19/Mexico/JAL-IndRE_FB13395_S1892/2021EPI_ISL_2158135 | 17/04/21 | North America / Mexico / Jalisco     | Human | Male   | 68 | Hospitalized | Oropharyngeal swab |
| hCoV-19/Mexico/CHH-IndRE_FB13410_S1893/2021EPI_ISL_2158136 | 06/04/21 | North America / Mexico / Chihuahua   | Human | Male   | 95 | Released     | Oropharyngeal swab |
| hCoV-19/Mexico/NLE-IndRE_FB13442_S1894/2021EPI_ISL_2158137 | 12/04/21 | North America / Mexico / Nuevo Leon  | Human | Male   | 83 | Hospitalized | Oropharyngeal swab |
| hCoV-19/Mexico/COL-IndRE_FB13480_S1895/2021EPI_ISL_2158138 | 15/04/21 | North America / Mexico / Colima      | Human | Female | 60 | Released     | Oropharyngeal swab |
| hCoV-19/Mexico/COL-IndRE_FB13481_S1896/2021EPI_ISL_2158139 | 15/04/21 | North America / Mexico / Colima      | Human | Male   | 54 | Released     | Oropharyngeal swab |
| hCoV-19/Mexico/COL-IndRE_FB13483_S1897/2021EPI_ISL_2158140 | 17/04/21 | North America / Mexico / Colima      | Human | Female | 61 | Released     | Oropharyngeal swab |
| hCoV-19/Mexico/QUE-IndRE_FB13484_S1898/2021EPI_ISL_2158141 | 14/04/21 | North America / Mexico / Queretaro   | Human | Female | 61 | Hospitalized | Oropharyngeal swab |
| hCoV-19/Mexico/VER-IndRE_FB13486_S1899/2021EPI_ISL_2158142 | 14/04/21 | North America / Mexico / Veracruz    | Human | Male   | 59 | Released     | Oropharyngeal swab |
| hCoV-19/Mexico/QUE-IndRE_FB13487_S1900/2021EPI_ISL_2158143 | 14/04/21 | North America / Mexico / Queretaro   | Human | Male   | 43 | Hospitalized | Oropharyngeal swab |
| hCoV-19/Mexico/QUE-IndRE_FB13488_S1901/2021EPI_ISL_2158144 | 14/04/21 | North America / Mexico / Queretaro   | Human | Male   | 57 | Deceased     | Oropharyngeal swab |
| hCoV-19/Mexico/QUE-IndRE_FB13491_S1902/2021EPI_ISL_2158145 | 16/04/21 | North America / Mexico / Queretaro   | Human | Female | 37 | Released     | Oropharyngeal swab |
| hCoV-19/Mexico/QUE-IndRE_FB13493_S1903/2021EPI_ISL_2158146 | 16/04/21 | North America / Mexico / Queretaro   | Human | Male   | 67 | Hospitalized | Oropharyngeal swab |
| hCoV-19/Mexico/QUE-IndRE_FB13498_S1904/2021EPI_ISL_2158147 | 19/04/21 | North America / Mexico / Queretaro   | Human | Female | 59 | Released     | Oropharyngeal swab |
| hCoV-19/Mexico/QUE-IndRE_FB13499_S1905/2021EPI_ISL_2158148 | 19/04/21 | North America / Mexico / Queretaro   | Human | Female | 60 | Live         | Oropharyngeal swab |
| hCoV-19/Mexico/QUE-IndRE_FB13500_S1906/2021EPI_ISL_2158149 | 19/04/21 | North America / Mexico / Queretaro   | Human | Male   | 57 | Hospitalized | Oropharyngeal swab |
| hCoV-19/Mexico/QUE-IndRE_FB13501_S1907/2021EPI_ISL_2158150 | 19/04/21 | North America / Mexico / Queretaro   | Human | Female | 55 | Hospitalized | Oropharyngeal swab |
| hCoV-19/Mexico/PUE-IndRE_FB13635_S1908/2021EPI_ISL_2158151 | 11/04/21 | North America / Mexico / Puebla      | Human | Male   | 61 | Hospitalized | Oropharyngeal swab |
| hCoV-19/Mexico/MOR-IndRE_FB13636_S1909/2021EPI_ISL_2158152 | 12/04/21 | North America / Mexico / Morelos     | Human | Female | 21 | Live         | Oropharyngeal swab |
| hCoV-19/Mexico/MOR-IndRE_FB13637_S1910/2021EPI_ISL_2158153 | 10/04/21 | North America / Mexico / Morelos     | Human | Male   | 92 | Hospitalized | Oropharyngeal swab |
| hCoV-19/Mexico/MOR-IndRE_FB13640_S1911/2021EPI_ISL_2158154 | 09/04/21 | North America / Mexico / Morelos     | Human | Female | 24 | Hospitalized | Oropharyngeal swab |
| hCoV-19/Mexico/MOR-IndRE_FB13641_S1912/2021EPI_ISL_2158155 | 12/04/21 | North America / Mexico / Morelos     | Human | Male   | 55 | Released     | Oropharyngeal swab |
| hCoV-19/Mexico/MOR-IndRE_FB13643_S1913/2021EPI_ISL_2158156 | 12/04/21 | North America / Mexico / Morelos     | Human | Male   | 64 | Hospitalized | Oropharyngeal swab |
| hCoV-19/Mexico/MOR-IndRE_FB13644_S1914/2021EPI_ISL_2158157 | 12/04/21 | North America / Mexico / Morelos     | Human | Female | 37 | Released     | Oropharyngeal swab |
| hCoV-19/Mexico/MOR-IndRE_FB13646_S1915/2021EPI_ISL_2158158 | 13/04/21 | North America / Mexico / Morelos     | Human | Male   | 72 | Hospitalized | Oropharyngeal swab |
| hCoV-19/Mexico/MOR-IndRE_FB13652_S1916/2021EPI_ISL_2158159 | 16/04/21 | North America / Mexico / Morelos     | Human | Male   | 77 | Hospitalized | Oropharyngeal swab |
| hCoV-19/Mexico/MOR-IndRE_FB13655_S1917/2021EPI_ISL_2158160 | 15/04/21 | North America / Mexico / Morelos     | Human | Male   | 38 | Hospitalized | Oropharyngeal swab |
| hCoV-19/Mexico/MOR-IndRE_FB13657_S1918/2021EPI_ISL_2158161 | 17/04/21 | North America / Mexico / Morelos     | Human | Male   | 34 | Hospitalized | Oropharyngeal swab |
| hCoV-19/Mexico/CHH-IndRE_FB13664_S1919/2021EPI_ISL_2158162 | 13/04/21 | North America / Mexico / Chihuahua   | Human | Female | 42 | Released     | Oropharyngeal swab |
| hCoV-19/Mexico/CHH-IndRE_FB13665_S1920/2021EPI_ISL_2158163 | 12/04/21 | North America / Mexico / Chihuahua   | Human | Female | 49 | Hospitalized | Oropharyngeal swab |
| hCoV-19/Mexico/CHH-IndRE_FB13683_S1922/2021EPI_ISL_2158164 | 12/04/21 | North America / Mexico / Chihuahua   | Human | Female | 53 | Hospitalized | Oropharyngeal swab |
| hCoV-19/Mexico/CHH-IndRE_FB13698_S1923/2021EPI_ISL_2158165 | 15/04/21 | North America / Mexico / Chihuahua   | Human | Male   | 36 | Hospitalized | Oropharyngeal swab |
| hCoV-19/Mexico/CMX-IndRE_FB13699_S1924/2021EPI_ISL_2158166 | 15/04/21 | North America / Mexico / Mexico City | Human | Male   | 35 | Hospitalized | Oropharyngeal swab |
| hCoV-19/Mexico/CHH-IndRE_FB13700_S1925/2021EPI_ISL_2158167 | 16/04/21 | North America / Mexico / Chihuahua   | Human | Male   | 38 | Released     | Oropharyngeal swab |
| hCoV-19/Mexico/CHH-IndRE_FB13703_S1926/2021EPI_ISL_2158168 | 15/04/21 | North America / Mexico / Chihuahua   | Human | Male   | 52 | Live         | Oropharyngeal swab |
| hCoV-19/Mexico/COA-IndRE_FB13706_S1927/2021EPI_ISL_2158169 | 17/04/21 | North America / Mexico / Coahuila    | Human | Male   | 65 | Live         | Oropharyngeal swab |

|                                                            |          |                                     |       |        |    |              |                    |
|------------------------------------------------------------|----------|-------------------------------------|-------|--------|----|--------------|--------------------|
| 1CoV-19/Mexico/GRO-IndRE_FB13747_S1928/2021EPI_ISL_2158170 | 16/04/21 | North America / Mexico / Guerrero   | Human | Male   | 53 | Deceased     | Oropharyngeal swab |
| hCoV-19/Mexico/JAL-IndRE_FB13749_S1929/2021EPI_ISL_2158171 | 17/04/21 | North America / Mexico / Jalisco    | Human | Female | 37 | Deceased     | Oropharyngeal swab |
| hCoV-19/Mexico/JAL-IndRE_FB13751_S1930/2021EPI_ISL_2158172 | 21/04/21 | North America / Mexico / Jalisco    | Human | Male   | 71 | Hospitalized | Oropharyngeal swab |
| hCoV-19/Mexico/SIN-IndRE_FB13789_S1931/2021EPI_ISL_2158173 | 16/04/21 | North America / Mexico / Sinaloa    | Human | Female | 70 | Hospitalized | Oropharyngeal swab |
| 1CoV-19/Mexico/MOR-IndRE_FB13790_S1932/2021EPI_ISL_2158174 | 18/04/21 | North America / Mexico / Morelos    | Human | Female | 38 | Released     | Oropharyngeal swab |
| 1CoV-19/Mexico/MOR-IndRE_FB13793_S1933/2021EPI_ISL_2158175 | 16/04/21 | North America / Mexico / Morelos    | Human | Male   | 82 | Hospitalized | Oropharyngeal swab |
| 1CoV-19/Mexico/MOR-IndRE_FB13795_S1934/2021EPI_ISL_2158176 | 19/04/21 | North America / Mexico / Morelos    | Human | Male   | 55 | Hospitalized | Oropharyngeal swab |
| 1CoV-19/Mexico/MOR-IndRE_FB13798_S1935/2021EPI_ISL_2158177 | 20/04/21 | North America / Mexico / Morelos    | Human | Male   | 19 | Released     | Oropharyngeal swab |
| 1CoV-19/Mexico/MOR-IndRE_FB13800_S1936/2021EPI_ISL_2158178 | 19/04/21 | North America / Mexico / Morelos    | Human | Male   | 64 | Hospitalized | Oropharyngeal swab |
| 1CoV-19/Mexico/MOR-IndRE_FB13801_S1937/2021EPI_ISL_2158179 | 20/04/21 | North America / Mexico / Morelos    | Human | Male   | 54 | Hospitalized | Oropharyngeal swab |
| 1CoV-19/Mexico/MOR-IndRE_FB13805_S1938/2021EPI_ISL_2158180 | 21/04/21 | North America / Mexico / Morelos    | Human | Male   | 89 | Hospitalized | Oropharyngeal swab |
| 1CoV-19/Mexico/MOR-IndRE_FB13807_S1939/2021EPI_ISL_2158181 | 22/04/21 | North America / Mexico / Morelos    | Human | Male   | 50 | Hospitalized | Oropharyngeal swab |
| 1CoV-19/Mexico/MOR-IndRE_FB13808_S1940/2021EPI_ISL_2158182 | 23/04/21 | North America / Mexico / Morelos    | Human | Female | 62 | Released     | Oropharyngeal swab |
| 1CoV-19/Mexico/MOR-IndRE_FB13809_S1941/2021EPI_ISL_2158183 | 23/04/21 | North America / Mexico / Morelos    | Human | Female | 43 | Live         | Oropharyngeal swab |
| 1CoV-19/Mexico/MOR-IndRE_FB13811_S1942/2021EPI_ISL_2158184 | 23/04/21 | North America / Mexico / Morelos    | Human | Female | 4  | Hospitalized | Oropharyngeal swab |
| 1CoV-19/Mexico/CHH-IndRE_FB13816_S1944/2021EPI_ISL_2158186 | 19/04/21 | North America / Mexico / Chihuahua  | Human | Female | 44 | Released     | Oropharyngeal swab |
| 1CoV-19/Mexico/CHH-IndRE_FB13817_S1945/2021EPI_ISL_2158187 | 19/04/21 | North America / Mexico / Chihuahua  | Human | Male   | 21 | Live         | Oropharyngeal swab |
| 1CoV-19/Mexico/CHH-IndRE_FB13821_S1946/2021EPI_ISL_2158188 | 21/04/21 | North America / Mexico / Chihuahua  | Human | Female | 54 | Deceased     | Oropharyngeal swab |
| 1CoV-19/Mexico/CHH-IndRE_FB13823_S1947/2021EPI_ISL_2158189 | 21/04/21 | North America / Mexico / Chihuahua  | Human | Female | 32 | Released     | Oropharyngeal swab |
| 1CoV-19/Mexico/CHH-IndRE_FB13828_S1948/2021EPI_ISL_2158190 | 21/04/21 | North America / Mexico / Chihuahua  | Human | Female | 22 | Released     | Oropharyngeal swab |
| 1CoV-19/Mexico/CHH-IndRE_FB13829_S1949/2021EPI_ISL_2158191 | 21/04/21 | North America / Mexico / Chihuahua  | Human | Female | 22 | Released     | Oropharyngeal swab |
| 1CoV-19/Mexico/CHH-IndRE_FB13830_S1950/2021EPI_ISL_2158192 | 21/04/21 | North America / Mexico / Chihuahua  | Human | Male   | 33 | Released     | Oropharyngeal swab |
| 1CoV-19/Mexico/CHH-IndRE_FB13831_S1951/2021EPI_ISL_2158193 | 21/04/21 | North America / Mexico / Chihuahua  | Human | Male   | 65 | Released     | Oropharyngeal swab |
| 1CoV-19/Mexico/CHH-IndRE_FB13833_S1952/2021EPI_ISL_2158194 | 21/04/21 | North America / Mexico / Chihuahua  | Human | Female | 29 | Released     | Oropharyngeal swab |
| 1CoV-19/Mexico/CHH-IndRE_FB13836_S1953/2021EPI_ISL_2158195 | 21/04/21 | North America / Mexico / Chihuahua  | Human | Female | 27 | Released     | Oropharyngeal swab |
| 1CoV-19/Mexico/CHH-IndRE_FB13837_S1954/2021EPI_ISL_2158196 | 21/04/21 | North America / Mexico / Chihuahua  | Human | Female | 49 | Released     | Oropharyngeal swab |
| 1CoV-19/Mexico/NLE-IndRE_FB13842_S1955/2021EPI_ISL_2158197 | 20/04/21 | North America / Mexico / Nuevo Leon | Human | Female | 80 | Hospitalized | Oropharyngeal swab |
| 1CoV-19/Mexico/CHH-IndRE_FB13676_S1956/2021EPI_ISL_2158198 | 16/04/21 | North America / Mexico / Chihuahua  | Human | Female | 53 | Released     | Oropharyngeal swab |
| 1CoV-19/Mexico/PUE-IndRE_FB13965_S1957/2021EPI_ISL_2158199 | 18/04/21 | North America / Mexico / Puebla     | Human | Male   | 70 | Hospitalized | Oropharyngeal swab |
| 1CoV-19/Mexico/PUE-IndRE_FB13966_S1958/2021EPI_ISL_2158200 | 17/04/21 | North America / Mexico / Puebla     | Human | Female | 66 | Deceased     | Oropharyngeal swab |
| hCoV-19/Mexico/JAL-IndRE_FB13973_S1959/2021EPI_ISL_2158201 | 21/04/21 | North America / Mexico / Jalisco    | Human | Male   | 81 | Released     | Oropharyngeal swab |
| hCoV-19/Mexico/JAL-IndRE_FB13974_S1960/2021EPI_ISL_2158202 | 21/04/21 | North America / Mexico / Jalisco    | Human | Female | 73 | Released     | Oropharyngeal swab |
| hCoV-19/Mexico/HID-IndRE_FB13994_S1961/2021EPI_ISL_2158203 | 24/04/21 | North America / Mexico / Hidalgo    | Human | Female | 23 | Released     | Oropharyngeal swab |
| 1CoV-19/Mexico/NAY-IndRE_FB14020_S1962/2021EPI_ISL_2158204 | 20/04/21 | North America / Mexico / Nayarit    | Human | Female | 85 | Released     | Oropharyngeal swab |
| 1CoV-19/Mexico/VER-IndRE_FB14025_S1963/2021EPI_ISL_2158205 | 17/04/21 | North America / Mexico / Veracruz   | Human | Male   | 58 | Released     | Oropharyngeal swab |
| 1CoV-19/Mexico/TAM-IndRE_FB14065_S1964/2021EPI_ISL_2158206 | 24/04/21 | North America / Mexico / Tamaulipas | Human | Female | 65 | Hospitalized | Oropharyngeal swab |
| 1CoV-19/Mexico/GUA-IndRE_FB13381_S1965/2021EPI_ISL_2158207 | 12/04/21 | North America / Mexico / Guanajuato | Human | Female | 29 | Released     | Oropharyngeal swab |
| 1CoV-19/Mexico/GUA-IndRE_FB13384_S1966/2021EPI_ISL_2158208 | 15/04/21 | North America / Mexico / Guanajuato | Human | Male   | 68 | Released     | Oropharyngeal swab |
| 1CoV-19/Mexico/GUA-IndRE_FB13865_S1967/2021EPI_ISL_2158209 | 17/04/21 | North America / Mexico / Guanajuato | Human | Female | 71 | Released     | Oropharyngeal swab |
| 1CoV-19/Mexico/GUA-IndRE_FB13867_S1968/2021EPI_ISL_2158210 | 17/04/21 | North America / Mexico / Guanajuato | Human | Female | 34 | Released     | Oropharyngeal swab |
| 1CoV-19/Mexico/GUA-IndRE_FB13868_S1969/2021EPI_ISL_2158211 | 19/04/21 | North America / Mexico / Guanajuato | Human | Female | 42 | Released     | Oropharyngeal swab |
| 1CoV-19/Mexico/GUA-IndRE_FB13870_S1970/2021EPI_ISL_2158212 | 18/04/21 | North America / Mexico / Guanajuato | Human | Male   | 46 | Released     | Oropharyngeal swab |
| 1CoV-19/Mexico/GUA-IndRE_FB13876_S1971/2021EPI_ISL_2158213 | 19/04/21 | North America / Mexico / Guanajuato | Human | Female | 26 | Released     | Oropharyngeal swab |
| 1CoV-19/Mexico/GUA-IndRE_FB13879_S1972/2021EPI_ISL_2158214 | 19/04/21 | North America / Mexico / Guanajuato | Human | Female | 50 | Released     | Oropharyngeal swab |



|                                                            |          |                                          |       |        |    |              |                    |
|------------------------------------------------------------|----------|------------------------------------------|-------|--------|----|--------------|--------------------|
| 1CoV-19/Mexico/GUA-InDRE_FB13883_S1973/2021EPI_ISL_2158215 | 19/04/21 | North America / Mexico / Guanajuato      | Human | Female | 50 | Released     | Oropharyngeal swab |
| 1CoV-19/Mexico/GUA-InDRE_FB13888_S1974/2021EPI_ISL_2158216 | 19/04/21 | North America / Mexico / Guanajuato      | Human | Female | 53 | Released     | Oropharyngeal swab |
| 1CoV-19/Mexico/GUA-InDRE_FB13908_S1975/2021EPI_ISL_2158217 | 21/04/21 | North America / Mexico / Guanajuato      | Human | Female | 57 | Released     | Oropharyngeal swab |
| 1CoV-19/Mexico/GUA-InDRE_FB13893_S1976/2021EPI_ISL_2158218 | 20/04/21 | North America / Mexico / Guanajuato      | Human | Female | 51 | Released     | Oropharyngeal swab |
| 1CoV-19/Mexico/GUA-InDRE_FB13897_S1977/2021EPI_ISL_2158219 | 20/04/21 | North America / Mexico / Guanajuato      | Human | Male   | 39 | Released     | Oropharyngeal swab |
| 1CoV-19/Mexico/GUA-InDRE_FB13899_S1978/2021EPI_ISL_2158220 | 21/04/21 | North America / Mexico / Guanajuato      | Human | Male   | 44 | Released     | Oropharyngeal swab |
| 1CoV-19/Mexico/GUA-InDRE_FB13903_S1979/2021EPI_ISL_2158221 | 20/04/21 | North America / Mexico / Guanajuato      | Human | Male   | 32 | Released     | Oropharyngeal swab |
| 1CoV-19/Mexico/GUA-InDRE_FB13912_S1980/2021EPI_ISL_2158222 | 21/04/21 | North America / Mexico / Guanajuato      | Human | Female | 45 | Released     | Oropharyngeal swab |
| 1CoV-19/Mexico/GUA-InDRE_FB13916_S1981/2021EPI_ISL_2158223 | 21/04/21 | North America / Mexico / Guanajuato      | Human | Female | 34 | Released     | Oropharyngeal swab |
| 1CoV-19/Mexico/GUA-InDRE_FB13924_S1982/2021EPI_ISL_2158224 | 21/04/21 | North America / Mexico / Guanajuato      | Human | Male   | 14 | Released     | Oropharyngeal swab |
| 1CoV-19/Mexico/GUA-InDRE_FB13928_S1983/2021EPI_ISL_2158225 | 22/04/21 | North America / Mexico / Guanajuato      | Human | Male   | 13 | Released     | Oropharyngeal swab |
| 1CoV-19/Mexico/PUE-InDRE_FB13954_S1984/2021EPI_ISL_2158226 | 21/04/21 | North America / Mexico / Puebla          | Human | Female | 27 | Hospitalized | Oropharyngeal swab |
| hCoV-19/Mexico/HID-InDRE_FB13988_S1985/2021EPI_ISL_2158227 | 20/04/21 | North America / Mexico / Hidalgo         | Human | Female | 55 | Hospitalized | Oropharyngeal swab |
| 1CoV-19/Mexico/VER-InDRE_FB14024_S1987/2021EPI_ISL_2158228 | 20/04/21 | North America / Mexico / Veracruz        | Human | Female | 67 | Deceased     | Oropharyngeal swab |
| 1CoV-19/Mexico/TAM-InDRE_FB14043_S1988/2021EPI_ISL_2158229 | 14/04/21 | North America / Mexico / Tamaulipas      | Human | Female | 83 | Hospitalized | Oropharyngeal swab |
| 1CoV-19/Mexico/CHP-InDRE_FB14077_S1989/2021EPI_ISL_2158230 | 21/04/21 | North America / Mexico / Chiapas         | Human | Female | 70 | Hospitalized | Oropharyngeal swab |
| 1CoV-19/Mexico/GRO-InDRE_FB14111_S1991/2021EPI_ISL_2158232 | 19/04/21 | North America / Mexico / Guerrero        | Human | Male   | 86 | Deceased     | Oropharyngeal swab |
| hCoV-19/Mexico/JAL-InDRE_FB14115_S1992/2021EPI_ISL_2158233 | 27/04/21 | North America / Mexico / Jalisco         | Human | Female | 32 | Hospitalized | Oropharyngeal swab |
| 1CoV-19/Mexico/COA-InDRE_FB14125_S1993/2021EPI_ISL_2158234 | 22/04/21 | North America / Mexico / Coahuila        | Human | Female | 53 | Released     | Oropharyngeal swab |
| 1CoV-19/Mexico/QUE-InDRE_FB13509_S1994/2021EPI_ISL_2158235 | 14/04/21 | North America / Mexico / Queretaro       | Human | Female | 80 | unknown      | Oropharyngeal swab |
| 1CoV-19/Mexico/QUE-InDRE_FB13582_S1995/2021EPI_ISL_2158236 | 18/04/21 | North America / Mexico / Queretaro       | Human | Male   | 57 | unknown      | Oropharyngeal swab |
| 1CoV-19/Mexico/ROO-InDRE_FB13722_S1996/2021EPI_ISL_2158237 | 11/04/21 | North America / Mexico / Quintana Roo    | Human | Female | 45 | unknown      | Oropharyngeal swab |
| 1CoV-19/Mexico/CMX-InDRE_FB13753_S1997/2021EPI_ISL_2158238 | 05/04/21 | North America / Mexico / Mexico City     | Human | Male   | 65 | unknown      | Oropharyngeal swab |
| 1CoV-19/Mexico/CMX-InDRE_FB13754_S1998/2021EPI_ISL_2158239 | 11/04/21 | North America / Mexico / Mexico City     | Human | Male   | 68 | unknown      | Oropharyngeal swab |
| 1CoV-19/Mexico/CMX-InDRE_FB13755_S1999/2021EPI_ISL_2158240 | 12/04/21 | North America / Mexico / Mexico City     | Human | Female | 66 | unknown      | Oropharyngeal swab |
| 1CoV-19/Mexico/CMX-InDRE_FB13756_S2000/2021EPI_ISL_2158241 | 13/04/21 | North America / Mexico / Mexico City     | Human | Male   | 60 | unknown      | Oropharyngeal swab |
| 1CoV-19/Mexico/QUE-InDRE_FB13841_S2001/2021EPI_ISL_2158242 | 06/04/21 | North America / Mexico / Queretaro       | Human | Male   | 31 | Deceased     | Oropharyngeal swab |
| 1CoV-19/Mexico/PUE-InDRE_FB13957_S2002/2021EPI_ISL_2158243 | 06/04/21 | North America / Mexico / Puebla          | Human | Male   | 89 | unknown      | Oropharyngeal swab |
| 1CoV-19/Mexico/PUE-InDRE_FB13958_S2003/2021EPI_ISL_2158244 | 24/04/21 | North America / Mexico / Puebla          | Human | Female | 85 | unknown      | Oropharyngeal swab |
| 1CoV-19/Mexico/PUE-InDRE_FB13960_S2004/2021EPI_ISL_2158245 | 08/04/21 | North America / Mexico / Puebla          | Human | Female | 61 | unknown      | Oropharyngeal swab |
| 1CoV-19/Mexico/PUE-InDRE_FB13962_S2005/2021EPI_ISL_2158246 | 10/04/21 | North America / Mexico / Puebla          | Human | Male   | 38 | unknown      | Oropharyngeal swab |
| 1CoV-19/Mexico/PUE-InDRE_FB13963_S2006/2021EPI_ISL_2158247 | 13/04/21 | North America / Mexico / Puebla          | Human | Female | 70 | unknown      | Oropharyngeal swab |
| 1CoV-19/Mexico/PUE-InDRE_FB13964_S2007/2021EPI_ISL_2158248 | 16/04/21 | North America / Mexico / Puebla          | Human | Male   | 76 | unknown      | Oropharyngeal swab |
| 1CoV-19/Mexico/GUA-InDRE_FB13380_S2008/2021EPI_ISL_2158249 | 12/04/21 | North America / Mexico / Guanajuato      | Human | Female | 50 | Released     | Oropharyngeal swab |
| 1CoV-19/Mexico/CMX-InDRE_FB14149_S2009/2021EPI_ISL_2158250 | 18/04/21 | North America / Mexico / Mexico City     | Human | Female | 68 | unknown      | Oropharyngeal swab |
| 1CoV-19/Mexico/CMX-InDRE_FB14151_S2010/2021EPI_ISL_2158251 | 21/04/21 | North America / Mexico / Mexico City     | Human | Female | 76 | unknown      | Oropharyngeal swab |
| 1CoV-19/Mexico/CMX-InDRE_FB14234_S2011/2021EPI_ISL_2158252 | 29/04/21 | North America / Mexico / Mexico City     | Human | Male   | 41 | unknown      | Oropharyngeal swab |
| 1CoV-19/Mexico/CMX-InDRE_FB14235_S2012/2021EPI_ISL_2158253 | 25/04/21 | North America / Mexico / Mexico City     | Human | Male   | 38 | unknown      | Oropharyngeal swab |
| 1CoV-19/Mexico/SON-InDRE_FB14301_S2013/2021EPI_ISL_2158254 | 29/04/21 | North America / Mexico / Sonora          | Human | Female | 92 | unknown      | Oropharyngeal swab |
| 1CoV-19/Mexico/MEX-InDRE_FD44713_S2014/2021EPI_ISL_2158255 | 06/04/21 | North America / Mexico / State of Mexico | Human | Female | 52 | unknown      | Oropharyngeal swab |
| 1CoV-19/Mexico/MEX-InDRE_FD48392_S2015/2021EPI_ISL_2158256 | 12/04/21 | North America / Mexico / State of Mexico | Human | Male   | 52 | unknown      | Oropharyngeal swab |
| 1CoV-19/Mexico/CMX-InDRE_FD54740_S2016/2021EPI_ISL_2158257 | 17/04/21 | North America / Mexico / Mexico City     | Human | Female | 24 | Released     | Oropharyngeal swab |
| 1CoV-19/Mexico/CMX-InDRE_FD54773_S2017/2021EPI_ISL_2158258 | 21/04/21 | North America / Mexico / Mexico City     | Human | Female | 61 | Released     | Oropharyngeal swab |
| 1CoV-19/Mexico/CMX-InDRE_FD57337_S2018/2021EPI_ISL_2158259 | 26/04/21 | North America / Mexico / Mexico City     | Human | Female | 37 | Released     | Oropharyngeal swab |

|                                                            |          |                                          |       |        |    |              |                                       |
|------------------------------------------------------------|----------|------------------------------------------|-------|--------|----|--------------|---------------------------------------|
| 1CoV-19/Mexico/CMX-InDRE_FD57472_S2019/2021EPI_ISL_2158260 | 23/04/21 | North America / Mexico / Mexico City     | Human | Male   | 47 | Hospitalized | Oropharyngeal swab                    |
| 1CoV-19/Mexico/CMX-InDRE_FD58104_S2020/2021EPI_ISL_2158261 | 27/04/21 | North America / Mexico / Mexico City     | Human | Female | 46 | Hospitalized | Oropharyngeal swab                    |
| 1CoV-19/Mexico/CMX-InDRE_FD58320_S2021/2021EPI_ISL_2158262 | 27/04/21 | North America / Mexico / Mexico City     | Human | Female | 28 | Released     | Oropharyngeal swab                    |
| 1CoV-19/Mexico/CMX-InDRE_FB14150_S2022/2021EPI_ISL_2158263 | 19/04/21 | North America / Mexico / Mexico City     | Human | Female | 77 | unknown      | Oropharyngeal swab                    |
| 1CoV-19/Mexico/NLE-InDRE_FB13355_S1875/2021EPI_ISL_2158319 | 14/04/21 | North America / Mexico / Nuevo Leon      | Human | Female | 61 | Released     | Oropharyngeal swab                    |
| 1CoV-19/Mexico/CHH-InDRE_FB13666_S1921/2021EPI_ISL_2158320 | 12/04/21 | North America / Mexico / Chihuahua       | Human | Male   | 43 | Deceased     | Oropharyngeal swab                    |
| 1CoV-19/Mexico/QUE-InDRE_FB14000_S1986/2021EPI_ISL_2158321 | 21/04/21 | North America / Mexico / Queretaro       | Human | Female | 44 | Deceased     | Oropharyngeal swab                    |
| hCoV-19/Mexico/CMX-INER-INMEGEN-00153/2021 EPI_ISL_2160642 | 14/04/21 | North America / Mexico / Mexico City     | Human | Male   | 29 | unknown      |                                       |
| hCoV-19/Mexico/CMX-INER-INMEGEN-00154/2021 EPI_ISL_2160644 | 16/04/21 | North America / Mexico / Mexico City     | Human | Male   | 53 | unknown      |                                       |
| hCoV-19/Mexico/CMX-INER-INMEGEN-00155/2021 EPI_ISL_2160646 | 16/04/21 | North America / Mexico / Mexico City     | Human | Male   | 24 | unknown      |                                       |
| hCoV-19/Mexico/CMX-INER-INMEGEN-00156/2021 EPI_ISL_2160647 | 16/04/21 | North America / Mexico / Mexico City     | Human | Male   | 53 | unknown      |                                       |
| hCoV-19/Mexico/CMX-INER-INMEGEN-00157/2021 EPI_ISL_2160649 | 16/04/21 | North America / Mexico / Mexico City     | Human | Male   | 49 | unknown      |                                       |
| hCoV-19/Mexico/CMX-INER-INMEGEN-00158/2021 EPI_ISL_2160650 | 16/04/21 | North America / Mexico / Mexico City     | Human | Male   | 76 | unknown      |                                       |
| hCoV-19/Mexico/CMX-INER-INMEGEN-00161/2021 EPI_ISL_2160655 | 16/04/21 | North America / Mexico / Mexico City     | Human | Female | 76 | unknown      |                                       |
| hCoV-19/Mexico/CMX-INER-INMEGEN-00163/2021 EPI_ISL_2160658 | 16/04/21 | North America / Mexico / Mexico City     | Human | Female | 53 | unknown      |                                       |
| hCoV-19/Mexico/CMX-INER-INMEGEN-00165/2021 EPI_ISL_2160661 | 16/04/21 | North America / Mexico / Mexico City     | Human | Male   | 65 | unknown      |                                       |
| hCoV-19/Mexico/CMX-INER-INMEGEN-00166/2021 EPI_ISL_2160662 | 16/04/21 | North America / Mexico / Mexico City     | Human | Female | 64 | unknown      |                                       |
| hCoV-19/Mexico/CMX-INER-INMEGEN-00168/2021 EPI_ISL_2160667 | 19/04/21 | North America / Mexico / Mexico City     | Human | Male   | 51 | unknown      |                                       |
| hCoV-19/Mexico/CMX-INER-INMEGEN-00172/2021 EPI_ISL_2160670 | 19/04/21 | North America / Mexico / Mexico City     | Human | Female | 89 | unknown      |                                       |
| hCoV-19/Mexico/CMX-INER-INMEGEN-00174/2021 EPI_ISL_2160671 | 19/04/21 | North America / Mexico / Mexico City     | Human | Male   | 18 | unknown      |                                       |
| hCoV-19/Mexico/CMX-INER-INMEGEN-00175/2021 EPI_ISL_2160673 | 19/04/21 | North America / Mexico / Mexico City     | Human | Male   | 50 | unknown      |                                       |
| hCoV-19/Mexico/CMX-INER-INMEGEN-00176/2021 EPI_ISL_2160674 | 19/04/21 | North America / Mexico / Mexico City     | Human | Female | 47 | unknown      |                                       |
| hCoV-19/Mexico/CMX-INER-INMEGEN-00177/2021 EPI_ISL_2160676 | 19/04/21 | North America / Mexico / Mexico City     | Human | Female | 55 | unknown      |                                       |
| hCoV-19/Mexico/CMX-INER-INMEGEN-00178/2021 EPI_ISL_2160678 | 19/04/21 | North America / Mexico / Mexico City     | Human | Female | 51 | unknown      |                                       |
| hCoV-19/Mexico/CMX-INER-INMEGEN-00179/2021 EPI_ISL_2160679 | 19/04/21 | North America / Mexico / Mexico City     | Human | Female | 11 | unknown      |                                       |
| hCoV-19/Mexico/CMX-INER-INMEGEN-00180/2021 EPI_ISL_2160681 | 19/04/21 | North America / Mexico / Mexico City     | Human | Female | 37 | unknown      |                                       |
| hCoV-19/Mexico/CMX-INER-INMEGEN-00181/2021 EPI_ISL_2160682 | 19/04/21 | North America / Mexico / Mexico City     | Human | Female | 68 | unknown      |                                       |
| hCoV-19/Mexico/CMX-INER-INMEGEN-00182/2021 EPI_ISL_2160684 | 19/04/21 | North America / Mexico / Mexico City     | Human | Male   | 52 | unknown      |                                       |
| hCoV-19/Mexico/CMX-INER-INMEGEN-00183/2021 EPI_ISL_2160685 | 19/04/21 | North America / Mexico / Mexico City     | Human | Male   | 49 | unknown      |                                       |
| hCoV-19/Mexico/CMX-INER-INMEGEN-00184/2021 EPI_ISL_2160687 | 19/04/21 | North America / Mexico / Mexico City     | Human | Male   | 52 | unknown      |                                       |
| hCoV-19/Mexico/CMX-INER-INMEGEN-00185/2021 EPI_ISL_2160689 | 19/04/21 | North America / Mexico / Mexico City     | Human | Male   | 49 | unknown      |                                       |
| hCoV-19/Mexico/CMX-INER-INMEGEN-00186/2021 EPI_ISL_2160690 | 19/04/21 | North America / Mexico / Mexico City     | Human | Male   | 18 | unknown      |                                       |
| hCoV-19/Mexico/CMX-INER-INMEGEN-00187/2021 EPI_ISL_2160692 | 19/04/21 | North America / Mexico / Mexico City     | Human | Male   | 21 | unknown      |                                       |
| hCoV-19/Mexico/CMX-INER-INMEGEN-00188/2021 EPI_ISL_2160693 | 19/04/21 | North America / Mexico / Mexico City     | Human | Male   | 24 | unknown      |                                       |
| hCoV-19/Mexico/CMX-INER-INMEGEN-00189/2021 EPI_ISL_2160695 | 19/04/21 | North America / Mexico / Mexico City     | Human | Female | 52 | unknown      |                                       |
| hCoV-19/Mexico/NLE_INER_IMSS_00741/2021 EPI_ISL_2178725    | 09/04/21 | North America / Mexico / Nuevo Leon      | Human | Male   | 56 | Hospitalized | Nasopharyngeal and oropharyngeal swab |
| hCoV-19/Mexico/GUA_INER_IMSS_00808/2021 EPI_ISL_2178729    | 01/04/21 | North America / Mexico / Guanajuato      | Human | Male   | 71 | Hospitalized | Nasopharyngeal and oropharyngeal swab |
| hCoV-19/Mexico/PUE_INER_IMSS_00884/2021 EPI_ISL_2178730    | 08/04/21 | North America / Mexico / Puebla          | Human | Female | 75 | Ambulatory   | Oropharyngeal swab                    |
| hCoV-19/Mexico/MEX_INER_IMSS_00890/2021 EPI_ISL_2178731    | 09/04/21 | North America / Mexico / State of Mexico | Human | Male   | 64 | Hospitalized | Nasopharyngeal and oropharyngeal swab |
| hCoV-19/Mexico/PUE_INER_IMSS_00913/2021 EPI_ISL_2178732    | 30/03/21 | North America / Mexico / Puebla          | Human | Male   | 52 | Hospitalized | Nasopharyngeal and oropharyngeal swab |
| hCoV-19/Mexico/PUE_INER_IMSS_00923/2021 EPI_ISL_2178733    | 13/04/21 | North America / Mexico / Puebla          | Human | Male   | 18 | Hospitalized | Nasopharyngeal and oropharyngeal swab |
| hCoV-19/Mexico/PUE_INER_IMSS_00924/2021 EPI_ISL_2178734    | 12/04/21 | North America / Mexico / Puebla          | Human | Male   | 52 | Hospitalized | Nasopharyngeal and oropharyngeal swab |
| hCoV-19/Mexico/PUE_INER_IMSS_00925/2021 EPI_ISL_2178735    | 13/04/21 | North America / Mexico / Puebla          | Human | Male   | 66 | Hospitalized | Nasopharyngeal and oropharyngeal swab |
| hCoV-19/Mexico/PUE_INER_IMSS_00952/2021 EPI_ISL_2178737    | 14/04/21 | North America / Mexico / Puebla          | Human | Female | 58 | Hospitalized | Nasopharyngeal and oropharyngeal swab |

|                                           |                 |          |                                          |       |        |    |              |                                       |
|-------------------------------------------|-----------------|----------|------------------------------------------|-------|--------|----|--------------|---------------------------------------|
| hCoV-19/Mexico/PUE_INER_IMSS_00954/2021   | EPI_ISL_217873E | 13/04/21 | North America / Mexico / Puebla          | Human | Female | 59 | Ambulatory   | Oropharyngeal swab                    |
| hCoV-19/Mexico/PUE_INER_IMSS_00958/2021   | EPI_ISL_217873E | 13/04/21 | North America / Mexico / Puebla          | Human | Female | 62 | Ambulatory   | Nasopharyngeal and oropharyngeal swab |
| hCoV-19/Mexico/QUE_INER_IMSS_00969/2021   | EPI_ISL_217874C | 16/04/21 | North America / Mexico / Queretaro       | Human | Male   | 61 | Hospitalized | Nasopharyngeal and oropharyngeal swab |
| hCoV-19/Mexico/CMX-INMEGEN-05-01-348/2021 | EPI_ISL_2178751 | 03/05/21 | North America / Mexico / Mexico City     | Human | Male   | 42 | unknown      | Oropharyngeal swab                    |
| hCoV-19/Mexico/CMX-INMEGEN-05-01-353/2021 | EPI_ISL_2178752 | 03/05/21 | North America / Mexico / Mexico City     | Human | Male   | 25 | unknown      | Oropharyngeal swab                    |
| hCoV-19/Mexico/MEX-INMEGEN-05-01-317/2021 | EPI_ISL_217875E | 01/05/21 | North America / Mexico / State of Mexico | Human | Female | 42 | unknown      | Oropharyngeal swab                    |
| hCoV-19/Mexico/CMX-INMEGEN-05-01-178/2021 | EPI_ISL_2230801 | 30/04/21 | North America / Mexico / Mexico City     | Human | Male   | 3  | unknown      | Oropharyngeal swab                    |
| hCoV-19/Mexico/CMX-INMEGEN-05-01-81/2021  | EPI_ISL_2230802 | 04/05/21 | North America / Mexico / Mexico City     | Human | Male   | 43 | unknown      | Oropharyngeal swab                    |
| hCoV-19/Mexico/CMX-INMEGEN-05-01-7/2021   | EPI_ISL_2230803 | 29/04/21 | North America / Mexico / Mexico City     | Human | Male   | 49 | unknown      | Oropharyngeal swab                    |
| hCoV-19/Mexico/MEX-INMEGEN-05-02-146/2021 | EPI_ISL_2230804 | 30/04/21 | North America / Mexico / State of Mexico | Human | Female | 59 | unknown      | Oropharyngeal swab                    |
| hCoV-19/Mexico/CMX-INMEGEN-05-01-144/2021 | EPI_ISL_223080E | 29/04/21 | North America / Mexico / Mexico City     | Human | Male   | 70 | unknown      | Oropharyngeal swab                    |
| hCoV-19/Mexico/CMX-INMEGEN-05-01-180/2021 | EPI_ISL_223080E | 05/02/21 | North America / Mexico / Mexico City     | Human | Female | 35 | unknown      | Oropharyngeal swab                    |
| hCoV-19/Mexico/CMX-INMEGEN-05-01-88/2021  | EPI_ISL_223080E | 06/05/21 | North America / Mexico / Mexico City     | Human | Male   | 46 | unknown      | Oropharyngeal swab                    |
| hCoV-19/Mexico/HID-INMEGEN-05-02-129/2021 | EPI_ISL_223081C | 29/04/21 | North America / Mexico / Hidalgo         | Human | Male   | 22 | unknown      | Oropharyngeal swab                    |
| hCoV-19/Mexico/CMX-INMEGEN-05-02-186/2021 | EPI_ISL_2230811 | 03/05/21 | North America / Mexico / Mexico City     | Human | Female | 26 | unknown      | Oropharyngeal swab                    |
| hCoV-19/Mexico/CMX-INMEGEN-05-02-111/2021 | EPI_ISL_2230813 | 04/05/21 | North America / Mexico / Mexico City     | Human | Male   | 43 | unknown      | Oropharyngeal swab                    |
| hCoV-19/Mexico/CMX-INMEGEN-05-01-132/2021 | EPI_ISL_2230814 | 29/04/21 | North America / Mexico / Mexico City     | Human | Female | 13 | unknown      | Oropharyngeal swab                    |
| hCoV-19/Mexico/CMX-INMEGEN-05-01-4/2021   | EPI_ISL_223081E | 29/04/21 | North America / Mexico / Mexico City     | Human | Female | 65 | unknown      | Oropharyngeal swab                    |
| hCoV-19/Mexico/MEX-INMEGEN-05-02-40/2021  | EPI_ISL_223081E | 05/05/21 | North America / Mexico / State of Mexico | Human | Male   | 17 | unknown      | Oropharyngeal swab                    |
| hCoV-19/Mexico/CMX-INMEGEN-05-02-45/2021  | EPI_ISL_223081F | 05/05/21 | North America / Mexico / Mexico City     | Human | Male   | 48 | unknown      | Oropharyngeal swab                    |
| hCoV-19/Mexico/CMX-INMEGEN-05-01-55/2021  | EPI_ISL_223081E | 03/05/21 | North America / Mexico / Mexico City     | Human | Male   | 40 | unknown      | Oropharyngeal swab                    |
| hCoV-19/Mexico/CMX-INMEGEN-05-01-58/2021  | EPI_ISL_223081E | 03/05/21 | North America / Mexico / Mexico City     | Human | Male   | 43 | unknown      | Oropharyngeal swab                    |
| hCoV-19/Mexico/CMX-INMEGEN-05-01-153/2021 | EPI_ISL_2230821 | 30/04/21 | North America / Mexico / Mexico City     | Human | Female | 20 | unknown      | Oropharyngeal swab                    |
| hCoV-19/Mexico/CMX-INMEGEN-05-01-126/2021 | EPI_ISL_2230822 | 28/04/21 | North America / Mexico / Mexico City     | Human | Male   | 49 | unknown      | Oropharyngeal swab                    |
| hCoV-19/Mexico/CMX-INMEGEN-05-01-115/2021 | EPI_ISL_2230823 | 28/04/21 | North America / Mexico / Mexico City     | Human | Female | 33 | unknown      | Oropharyngeal swab                    |
| hCoV-19/Mexico/CMX-INMEGEN-05-01-129/2021 | EPI_ISL_2230824 | 28/04/21 | North America / Mexico / Mexico City     | Human | Male   | 38 | unknown      | Oropharyngeal swab                    |
| hCoV-19/Mexico/CMX-INMEGEN-05-01-159/2021 | EPI_ISL_2230827 | 30/04/21 | North America / Mexico / Mexico City     | Human | Male   | 57 | unknown      | Oropharyngeal swab                    |
| hCoV-19/Mexico/CMX-INMEGEN-05-02-56/2021  | EPI_ISL_223083E | 06/05/21 | North America / Mexico / Mexico City     | Human | Male   | 26 | unknown      | Oropharyngeal swab                    |
| hCoV-19/Mexico/CMX-INMEGEN-05-01-9/2021   | EPI_ISL_223083E | 29/04/21 | North America / Mexico / Mexico City     | Human | Female | 48 | unknown      | Oropharyngeal swab                    |
| hCoV-19/Mexico/CMX-INMEGEN-05-01-182/2021 | EPI_ISL_2230837 | 05/02/21 | North America / Mexico / Mexico City     | Human | Male   | 53 | unknown      | Oropharyngeal swab                    |
| hCoV-19/Mexico/MEX-INMEGEN-05-02-44/2021  | EPI_ISL_223083E | 05/05/21 | North America / Mexico / State of Mexico | Human | Male   | 30 | unknown      | Oropharyngeal swab                    |
| hCoV-19/Mexico/CMX-INMEGEN-05-01-69/2021  | EPI_ISL_223083E | 04/05/21 | North America / Mexico / Mexico City     | Human | Male   | 59 | unknown      | Oropharyngeal swab                    |
| hCoV-19/Mexico/CMX-INMEGEN-05-01-185/2021 | EPI_ISL_223084C | 30/04/21 | North America / Mexico / Mexico City     | Human | Male   | 57 | unknown      | Oropharyngeal swab                    |
| hCoV-19/Mexico/MEX-INMEGEN-05-02-124/2021 | EPI_ISL_2230842 | 29/04/21 | North America / Mexico / State of Mexico | Human | Male   | 32 | unknown      | Oropharyngeal swab                    |
| hCoV-19/Mexico/MEX-INMEGEN-05-02-48/2021  | EPI_ISL_2230844 | 05/05/21 | North America / Mexico / State of Mexico | Human | Female | 38 | unknown      | Oropharyngeal swab                    |
| hCoV-19/Mexico/CMX-INMEGEN-05-01-139/2021 | EPI_ISL_223084E | 29/04/21 | North America / Mexico / Mexico City     | Human | Female | 22 | unknown      | Oropharyngeal swab                    |
| hCoV-19/Mexico/CMX-INMEGEN-05-02-81/2021  | EPI_ISL_2230847 | 10/05/21 | North America / Mexico / Mexico City     | Human | Female | 58 | unknown      | Oropharyngeal swab                    |
| hCoV-19/Mexico/CMX-INMEGEN-05-01-10/2021  | EPI_ISL_223084E | 29/04/21 | North America / Mexico / Mexico City     | Human | Female | 71 | unknown      | Oropharyngeal swab                    |
| hCoV-19/Mexico/MEX-INMEGEN-05-02-83/2021  | EPI_ISL_223084E | 28/04/21 | North America / Mexico / State of Mexico | Human | Female | 28 | unknown      | Oropharyngeal swab                    |
| hCoV-19/Mexico/HID-INMEGEN-05-02-128/2021 | EPI_ISL_223085C | 29/04/21 | North America / Mexico / Hidalgo         | Human | Male   | 17 | unknown      | Oropharyngeal swab                    |
| hCoV-19/Mexico/MEX-INMEGEN-05-02-170/2021 | EPI_ISL_2230851 | 02/05/21 | North America / Mexico / State of Mexico | Human | Female | 51 | unknown      | Oropharyngeal swab                    |
| hCoV-19/Mexico/CMX-INMEGEN-05-01-140/2021 | EPI_ISL_2230852 | 29/04/21 | North America / Mexico / Mexico City     | Human | Female | 24 | unknown      | Oropharyngeal swab                    |
| hCoV-19/Mexico/CMX-INMEGEN-05-02-125/2021 | EPI_ISL_2230853 | 29/04/21 | North America / Mexico / Mexico City     | Human | Female | 33 | unknown      | Oropharyngeal swab                    |
| hCoV-19/Mexico/MEX-INMEGEN-05-02-31/2021  | EPI_ISL_2230854 | 05/05/21 | North America / Mexico / State of Mexico | Human | Male   | 48 | unknown      | Oropharyngeal swab                    |







|                                           |                 |          |                                                    |       |         |         |            |                    |
|-------------------------------------------|-----------------|----------|----------------------------------------------------|-------|---------|---------|------------|--------------------|
| hCoV-19/Mexico/CMX-INMEGEN-05-02-165/2021 | EPI_ISL_2231028 | 02/05/21 | North America / Mexico / Mexico City               | Human | Male    | 32      | unknown    | Oropharyngeal swab |
| hCoV-19/Mexico/MEX-INMEGEN-05-02-167/2021 | EPI_ISL_2231029 | 02/05/21 | North America / Mexico / State of Mexico           | Human | Female  | 54      | unknown    | Oropharyngeal swab |
| hCoV-19/Mexico/CMX-INMEGEN-05-02-169/2021 | EPI_ISL_2231030 | 02/05/21 | North America / Mexico / Mexico City               | Human | Female  | 67      | unknown    | Oropharyngeal swab |
| hCoV-19/Mexico/HID-INMEGEN-05-02-173/2021 | EPI_ISL_2231031 | 02/05/21 | North America / Mexico / Hidalgo                   | Human | Female  | 49      | unknown    | Oropharyngeal swab |
| hCoV-19/Mexico/MEX-INMEGEN-05-02-174/2021 | EPI_ISL_2231032 | 02/05/21 | North America / Mexico / State of Mexico           | Human | Female  | 41      | unknown    | Oropharyngeal swab |
| hCoV-19/Mexico/MEX-INMEGEN-05-02-176/2021 | EPI_ISL_2231033 | 02/05/21 | North America / Mexico / State of Mexico           | Human | Female  | 48      | unknown    | Oropharyngeal swab |
| hCoV-19/Mexico/MEX-INMEGEN-05-02-177/2021 | EPI_ISL_2231034 | 02/05/21 | North America / Mexico / State of Mexico           | Human | Male    | 34      | unknown    | Oropharyngeal swab |
| hCoV-19/Mexico/MEX-INMEGEN-05-02-180/2021 | EPI_ISL_2231035 | 02/05/21 | North America / Mexico / State of Mexico           | Human | Female  | 51      | unknown    | Oropharyngeal swab |
| hCoV-19/Mexico/CMX-INMEGEN-05-02-181/2021 | EPI_ISL_2231036 | 02/05/21 | North America / Mexico / Mexico City               | Human | Male    | 38      | unknown    | Oropharyngeal swab |
| hCoV-19/Mexico/CMX-INMEGEN-05-02-185/2021 | EPI_ISL_2231037 | 03/05/21 | North America / Mexico / Mexico City               | Human | Female  | 32      | unknown    | Oropharyngeal swab |
| hCoV-19/Mexico/SEARCH-100579/2021         | EPI_ISL_2231479 | 03/02/21 | North America / Mexico / Baja California / Tijuana | Human | unknown | unknown | Nasal swab |                    |
| hCoV-19/Mexico/SEARCH-100586/2021         | EPI_ISL_2231486 | 03/02/21 | North America / Mexico / Baja California / Tijuana | Human | unknown | unknown | Nasal swab |                    |
| hCoV-19/Mexico/SEARCH-100596/2021         | EPI_ISL_2231494 | 28/01/21 | North America / Mexico / Baja California / Tijuana | Human | unknown | unknown | Nasal swab |                    |
| hCoV-19/Mexico/SEARCH-100603/2021         | EPI_ISL_2231499 | 18/02/21 | North America / Mexico / Baja California / Tijuana | Human | unknown | unknown | Nasal swab |                    |
| hCoV-19/Mexico/SEARCH-100631/2021         | EPI_ISL_2231525 | 26/02/21 | North America / Mexico / Baja California / Tijuana | Human | unknown | unknown | Nasal swab |                    |
| hCoV-19/Mexico/SIN_CIAD_S6591/2021        | EPI_ISL_2249227 | 19/04/21 | North America / Mexico / Sinaloa / Mazatlan        | Human | Female  | 26      | unknown    | Oropharyngeal swab |
| hCoV-19/Mexico/SIN_CIAD_HJ1564/2021       | EPI_ISL_2249229 | 28/04/21 | North America / Mexico / Sinaloa / Mazatlan        | Human | Male    | 55      | unknown    | Oropharyngeal swab |
| hCoV-19/Mexico/SIN_CIAD_S6665/2021        | EPI_ISL_2249231 | 28/04/21 | North America / Mexico / Sinaloa / Mazatlan        | Human | Male    | 50      | unknown    | Oropharyngeal swab |
| hCoV-19/Mexico/SIN_CIAD_HJ1571/2021       | EPI_ISL_2249232 | 29/04/21 | North America / Mexico / Sinaloa / Mazatlan        | Human | Male    | 56      | unknown    | Oropharyngeal swab |
| hCoV-19/Mexico/SIN_CIAD_HJ1589/2021       | EPI_ISL_2249235 | 03/05/21 | North America / Mexico / Sinaloa / Mazatlan        | Human | Female  | 48      | unknown    | Oropharyngeal swab |
| hCoV-19/Mexico/SIN_CIAD_S6702/2021        | EPI_ISL_2249237 | 03/05/21 | North America / Mexico / Sinaloa / Mazatlan        | Human | Male    | 54      | unknown    | Oropharyngeal swab |
| hCoV-19/Mexico/SIN_CIAD_S6703/2021        | EPI_ISL_2249238 | 03/05/21 | North America / Mexico / Sinaloa / Mazatlan        | Human | Female  | 78      | unknown    | Oropharyngeal swab |
| hCoV-19/Mexico/SIN-CIAD-L8423/2021        | EPI_ISL_2272501 | 30/03/21 | North America / Mexico / Sinaloa                   | Human | Female  | 73      | unknown    | Oropharyngeal swab |
| hCoV-19/Mexico/SIN-CIAD-L8438/2021        | EPI_ISL_2272502 | 31/03/21 | North America / Mexico / Sinaloa                   | Human | Male    | 65      | unknown    | Oropharyngeal swab |
| hCoV-19/Mexico/SIN-CIAD-L8489/2021        | EPI_ISL_2272503 | 08/04/21 | North America / Mexico / Sinaloa                   | Human | Male    | 84      | unknown    | Oropharyngeal swab |
| hCoV-19/Mexico/SIN-CIAD-L8493/2021        | EPI_ISL_2272504 | 08/04/21 | North America / Mexico / Sinaloa                   | Human | Male    | 63      | unknown    | Oropharyngeal swab |
| hCoV-19/Mexico/SIN-CIAD-L8497/2021        | EPI_ISL_2272505 | 09/04/21 | North America / Mexico / Sinaloa                   | Human | Male    | 34      | unknown    | Oropharyngeal swab |
| hCoV-19/Mexico/SIN-CIAD-L8514/2021        | EPI_ISL_2272507 | 09/04/21 | North America / Mexico / Sinaloa                   | Human | Female  | 66      | unknown    | Oropharyngeal swab |
| hCoV-19/Mexico/SIN-CIAD-L8524/2021        | EPI_ISL_2272508 | 09/04/21 | North America / Mexico / Sinaloa                   | Human | Female  | 89      | unknown    | Oropharyngeal swab |
| hCoV-19/Mexico/SIN-CIAD-L8535/2021        | EPI_ISL_2272509 | 13/04/21 | North America / Mexico / Sinaloa                   | Human | Male    | 68      | unknown    | Oropharyngeal swab |
| hCoV-19/Mexico/SIN-CIAD-L8542/2021        | EPI_ISL_2272510 | 13/04/21 | North America / Mexico / Sinaloa                   | Human | Male    | 35      | unknown    | Oropharyngeal swab |
| hCoV-19/Mexico/SIN-CIAD-L8551/2021        | EPI_ISL_2272511 | 14/04/21 | North America / Mexico / Sinaloa                   | Human | Female  | 46      | unknown    | Oropharyngeal swab |
| hCoV-19/Mexico/SIN-CIAD-L8553/2021        | EPI_ISL_2272512 | 13/04/21 | North America / Mexico / Sinaloa                   | Human | Male    | 73      | unknown    | Oropharyngeal swab |
| hCoV-19/Mexico/SIN-CIAD-L8560/2021        | EPI_ISL_2272513 | 15/04/21 | North America / Mexico / Sinaloa                   | Human | Male    | 89      | unknown    | Oropharyngeal swab |
| hCoV-19/Mexico/SIN-CIAD-L8623/2021        | EPI_ISL_2272514 | 22/04/21 | North America / Mexico / Sinaloa                   | Human | Female  | 67      | unknown    | Oropharyngeal swab |
| hCoV-19/Mexico/SIN-CIAD-L8624/2021        | EPI_ISL_2272515 | 22/04/21 | North America / Mexico / Sinaloa                   | Human | Male    | 60      | unknown    | Oropharyngeal swab |
| hCoV-19/Mexico/SIN-CIAD-L8644/2021        | EPI_ISL_2272517 | 26/04/21 | North America / Mexico / Sinaloa                   | Human | Female  | 51      | unknown    | Oropharyngeal swab |
| hCoV-19/Mexico/SIN-CIAD-L8650/2021        | EPI_ISL_2272518 | 26/04/21 | North America / Mexico / Sinaloa                   | Human | Male    | 53      | unknown    | Oropharyngeal swab |
| hCoV-19/Mexico/SIN-CIAD-L8665/2021        | EPI_ISL_2272519 | 28/04/21 | North America / Mexico / Sinaloa                   | Human | Female  | 49      | unknown    | Oropharyngeal swab |
| hCoV-19/Mexico/SIN-CIAD-L8713/2021        | EPI_ISL_2272520 | 04/05/21 | North America / Mexico / Sinaloa                   | Human | Female  | 75      | unknown    | Oropharyngeal swab |
| hCoV-19/Mexico/CMX-INMEGEN-05-01-147/2021 | EPI_ISL_2276106 | 29/04/21 | North America / Mexico / Mexico City               | Human | Male    | 28      | unknown    | Oropharyngeal swab |
| hCoV-19/Mexico/MEX-INMEGEN-05-03-1/2021   | EPI_ISL_2319171 | 06/05/21 | North America / Mexico / State of Mexico           | Human | Male    | 39      | unknown    | Oropharyngeal swab |
| hCoV-19/Mexico/CMX-INMEGEN-05-03-2/2021   | EPI_ISL_2319172 | 06/05/21 | North America / Mexico / Mexico City               | Human | Male    | 32      | unknown    | Oropharyngeal swab |
| hCoV-19/Mexico/MEX-INMEGEN-05-03-6/2021   | EPI_ISL_2319176 | 07/05/21 | North America / Mexico / State of Mexico           | Human | Female  | 59      | unknown    | Oropharyngeal swab |









|                                               |                 |          |                                                    |       |         |         |              |                    |
|-----------------------------------------------|-----------------|----------|----------------------------------------------------|-------|---------|---------|--------------|--------------------|
| oV-19/Mexico/CMX-INMEGEN-INDRE-05-03-276/2021 | EPI_ISL_2319376 | 14/05/21 | North America / Mexico / Mexico City               | Human | Male    | 34      | unknown      | Oropharyngeal swab |
| oV-19/Mexico/CMX-INMEGEN-INDRE-05-03-277/2021 | EPI_ISL_2319377 | 12/05/21 | North America / Mexico / Mexico City               | Human | Female  | 45      | unknown      | Oropharyngeal swab |
| oV-19/Mexico/CMX-INMEGEN-INDRE-05-03-279/2021 | EPI_ISL_2319378 | 14/05/21 | North America / Mexico / Mexico City               | Human | Female  | 21      | unknown      | Oropharyngeal swab |
| oV-19/Mexico/CMX-INMEGEN-INDRE-05-03-280/2021 | EPI_ISL_2319379 | 14/05/21 | North America / Mexico / Mexico City               | Human | Male    | 37      | unknown      | Oropharyngeal swab |
| oV-19/Mexico/CMX-INMEGEN-INDRE-05-03-282/2021 | EPI_ISL_2319381 | 15/05/21 | North America / Mexico / Mexico City               | Human | Female  | 47      | unknown      | Oropharyngeal swab |
| hCoV-19/Mexico/MEX-INMEGEN-05-03-290/2021     | EPI_ISL_2319384 | 05/05/21 | North America / Mexico / State of Mexico           | Human | Male    | 68      | unknown      | Oropharyngeal swab |
| hCoV-19/Mexico/MEX-INMEGEN-05-03-298/2021     | EPI_ISL_2319386 | 05/05/21 | North America / Mexico / State of Mexico           | Human | Female  | 25      | unknown      | Oropharyngeal swab |
| hCoV-19/Mexico/CMX-INMEGEN-05-03-304/2021     | EPI_ISL_2319387 | 11/05/21 | North America / Mexico / Mexico City               | Human | Female  | 55      | unknown      | Oropharyngeal swab |
| hCoV-19/Mexico/CMX-INMEGEN-05-03-315/2021     | EPI_ISL_2319388 | 12/05/21 | North America / Mexico / Mexico City               | Human | Male    | 44      | unknown      | Oropharyngeal swab |
| hCoV-19/Mexico/CMX-INMEGEN-05-03-316/2021     | EPI_ISL_2319389 | 12/05/21 | North America / Mexico / Mexico City               | Human | Male    | 54      | unknown      | Oropharyngeal swab |
| hCoV-19/Mexico/CMX-INMEGEN-05-03-320/2021     | EPI_ISL_2319391 | 07/05/21 | North America / Mexico / Mexico City               | Human | Male    | 30      | unknown      | Oropharyngeal swab |
| hCoV-19/Mexico/MEX-INMEGEN-05-03-323/2021     | EPI_ISL_2319392 | 06/05/21 | North America / Mexico / State of Mexico           | Human | Female  | 35      | unknown      | Oropharyngeal swab |
| hCoV-19/Mexico/MEX-INMEGEN-05-03-325/2021     | EPI_ISL_2319394 | 03/05/21 | North America / Mexico / State of Mexico           | Human | Male    | 35      | unknown      | Oropharyngeal swab |
| hCoV-19/Mexico/MEX-INMEGEN-05-03-329/2021     | EPI_ISL_2319397 | 05/05/21 | North America / Mexico / State of Mexico           | Human | Male    | 28      | unknown      | Oropharyngeal swab |
| hCoV-19/Mexico/MEX-INMEGEN-05-03-330/2021     | EPI_ISL_2319398 | 06/05/21 | North America / Mexico / State of Mexico           | Human | Male    | 37      | unknown      | Oropharyngeal swab |
| hCoV-19/Mexico/CMX-INMEGEN-05-03-334/2021     | EPI_ISL_2319401 | 06/05/21 | North America / Mexico / Mexico City               | Human | Female  | 33      | unknown      | Oropharyngeal swab |
| hCoV-19/Mexico/CMX-INMEGEN-05-03-343/2021     | EPI_ISL_2319404 | 06/05/21 | North America / Mexico / Mexico City               | Human | Female  | 14      | unknown      | Oropharyngeal swab |
| hCoV-19/Mexico/CMX-INMEGEN-05-03-352/2021     | EPI_ISL_2319407 | 06/05/21 | North America / Mexico / Mexico City               | Human | Female  | 37      | unknown      | Oropharyngeal swab |
| hCoV-19/Mexico/MEX-INMEGEN-05-03-354/2021     | EPI_ISL_2319408 | 06/05/21 | North America / Mexico / State of Mexico           | Human | Female  | 36      | unknown      | Oropharyngeal swab |
| hCoV-19/Mexico/MEX-INMEGEN-05-03-355/2021     | EPI_ISL_2319409 | 06/05/21 | North America / Mexico / State of Mexico           | Human | Female  | 26      | unknown      | Oropharyngeal swab |
| hCoV-19/Mexico/MEX-INMEGEN-05-03-356/2021     | EPI_ISL_2319410 | 06/05/21 | North America / Mexico / State of Mexico           | Human | Male    | 68      | unknown      | Oropharyngeal swab |
| hCoV-19/Mexico/SEARCH-101094/2021             | EPI_ISL_2329447 | 04/05/21 | North America / Mexico / Baja California / Tijuana | Human | unknown | unknown | unknown      | Nasal swab         |
| CoV-19/Mexico/GUA-INDRE_FB13872_S2217/2021    | EPI_ISL_2340860 | 20/04/21 | North America / Mexico / Guanajuato                | Human | Male    | 49      | Hospitalized | Oropharyngeal swab |
| hCoV-19/Mexico/JAL-INDRE_FB14714_S2143/2021   | EPI_ISL_2340861 | 05/04/21 | North America / Mexico / Jalisco                   | Human | Female  | 83      | Hospitalized | Oropharyngeal swab |
| hCoV-19/Mexico/MIC-INDRE_FB15009_S2159/2021   | EPI_ISL_2340862 | 19/04/21 | North America / Mexico / Michoacan                 | Human | Male    | 57      | Released     | Oropharyngeal swab |
| CoV-19/Mexico/GUA-INDRE_FB13929_S2220/2021    | EPI_ISL_2340863 | 22/04/21 | North America / Mexico / Guanajuato                | Human | Female  | 43      | Hospitalized | Oropharyngeal swab |
| CoV-19/Mexico/GUA-INDRE_FB13882_S2213/2021    | EPI_ISL_2340864 | 20/04/21 | North America / Mexico / Guanajuato                | Human | Female  | 42      | Released     | Oropharyngeal swab |
| hCoV-19/Mexico/MIC-INDRE_FB15008_S2158/2021   | EPI_ISL_2340865 | 19/04/21 | North America / Mexico / Michoacan                 | Human | Female  | 53      | unknown      | Oropharyngeal swab |
| CoV-19/Mexico/GUA-INDRE_FB13385_S2209/2021    | EPI_ISL_2340866 | 15/04/21 | North America / Mexico / Guanajuato                | Human | Female  | 68      | Released     | Oropharyngeal swab |
| CoV-19/Mexico/NLE-INDRE_FB13854_S2210/2021    | EPI_ISL_2340867 | 21/04/21 | North America / Mexico / Nuevo Leon                | Human | Male    | 17      | Released     | Oropharyngeal swab |
| hCoV-19/Mexico/MIC-INDRE_FB14992_S2153/2021   | EPI_ISL_2340868 | 11/04/21 | North America / Mexico / Michoacan                 | Human | Male    | 64      | Released     | Oropharyngeal swab |
| hCoV-19/Mexico/MIC-INDRE_FB15002_S2155/2021   | EPI_ISL_2340869 | 18/04/21 | North America / Mexico / Michoacan                 | Human | Male    | 57      | Released     | Oropharyngeal swab |
| hCoV-19/Mexico/MIC-INDRE_FB15029_S2166/2021   | EPI_ISL_2340870 | 01/05/21 | North America / Mexico / Michoacan                 | Human | Female  | 49      | Deceased     | Oropharyngeal swab |
| CoV-19/Mexico/OAX-INDRE_FB14535_S2139/2021    | EPI_ISL_2340871 | 27/04/21 | North America / Mexico / Oaxaca                    | Human | Male    | 52      | Released     | Oropharyngeal swab |
| hCoV-19/Mexico/MIC-INDRE_FB14988_S2150/2021   | EPI_ISL_2340872 | 06/04/21 | North America / Mexico / Michoacan                 | Human | Female  | 50      | Released     | Oropharyngeal swab |
| hCoV-19/Mexico/MIC-INDRE_FB14991_S2152/2021   | EPI_ISL_2340873 | 10/04/21 | North America / Mexico / Michoacan                 | Human | Male    | 56      | Deceased     | Oropharyngeal swab |
| CoV-19/Mexico/YUC-INDRE_FB15180_S2206/2021    | EPI_ISL_2340874 | 26/03/21 | North America / Mexico / Yucatan                   | Human | Male    | 85      | Deceased     | Oropharyngeal swab |
| hCoV-19/Mexico/SIN-INDRE_FB15067_S2233/2021   | EPI_ISL_2340875 | 30/04/21 | North America / Mexico / Sinaloa                   | Human | Male    | 40      | Released     | Oropharyngeal swab |
| CoV-19/Mexico/QUE-INDRE_FB14003_S2236/2021    | EPI_ISL_2340876 | 22/04/21 | North America / Mexico / Queretaro                 | Human | Female  | 39      | Released     | Oropharyngeal swab |
| CoV-19/Mexico/TAM-INDRE_FB14049_S2249/2021    | EPI_ISL_2340877 | 16/04/21 | North America / Mexico / Tamaulipas                | Human | Male    | 72      | Hospitalized | Oropharyngeal swab |
| CoV-19/Mexico/TAM-INDRE_FB14059_S2252/2021    | EPI_ISL_2340878 | 14/04/21 | North America / Mexico / Tamaulipas                | Human | Male    | 37      | Released     | Oropharyngeal swab |
| CoV-19/Mexico/GUA-INDRE_FB13900_S2273/2021    | EPI_ISL_2340879 | 20/04/21 | North America / Mexico / Guanajuato                | Human | Female  | 34      | Released     | Oropharyngeal swab |
| CoV-19/Mexico/GUA-INDRE_FB13859_S2277/2021    | EPI_ISL_2340880 | 16/04/21 | North America / Mexico / Guanajuato                | Human | Male    | 36      | Released     | Oropharyngeal swab |
| CoV-19/Mexico/QUE-INDRE_FB14552_S2291/2021    | EPI_ISL_2340881 | 03/05/21 | North America / Mexico / Queretaro                 | Human | Female  | 93      | Released     | Oropharyngeal swab |

|                                                            |          |                                      |       |        |    |              |                    |
|------------------------------------------------------------|----------|--------------------------------------|-------|--------|----|--------------|--------------------|
| 1CoV-19/Mexico/CMX-InDRE_FB14722_S2297/2021EPI_ISL_2340882 | 30/04/21 | North America / Mexico / Mexico City | Human | Male   | 40 | Released     | Oropharyngeal swab |
| 1CoV-19/Mexico/QUE-InDRE_FB14002_S2138/2021EPI_ISL_2340883 | 22/04/21 | North America / Mexico / Queretaro   | Human | Male   | 53 | Hospitalized | Oropharyngeal swab |
| hCoV-19/Mexico/SIN-InDRE_FB14665_S2140/2021EPI_ISL_2340884 | 27/04/21 | North America / Mexico / Sinaloa     | Human | Male   | 14 | unknown      | Oropharyngeal swab |
| hCoV-19/Mexico/SIN-InDRE_FB14666_S2141/2021EPI_ISL_2340885 | 27/04/21 | North America / Mexico / Sinaloa     | Human | Male   | 21 | unknown      | Oropharyngeal swab |
| 1CoV-19/Mexico/TAM-InDRE_FB14703_S2142/2021EPI_ISL_2340886 | 28/04/21 | North America / Mexico / Tamaulipas  | Human | Female | 41 | Released     | Oropharyngeal swab |
| 1CoV-19/Mexico/CAM-InDRE_FB14884_S2144/2021EPI_ISL_2340887 | 08/05/21 | North America / Mexico / Campeche    | Human | Male   | 89 | Deceased     | Oropharyngeal swab |
| 1CoV-19/Mexico/CHH-InDRE_FB14916_S2145/2021EPI_ISL_2340888 | 29/04/21 | North America / Mexico / Chihuahua   | Human | Male   | 59 | Hospitalized | Oropharyngeal swab |
| 1CoV-19/Mexico/CHH-InDRE_FB14917_S2146/2021EPI_ISL_2340889 | 03/05/21 | North America / Mexico / Chihuahua   | Human | Male   | 48 | Hospitalized | Oropharyngeal swab |
| hCoV-19/Mexico/MIC-InDRE_FB14985_S2147/2021EPI_ISL_2340890 | 03/04/21 | North America / Mexico / Michoacan   | Human | Female | 58 | Released     | Oropharyngeal swab |
| hCoV-19/Mexico/MIC-InDRE_FB14977_S2148/2021EPI_ISL_2340891 | 26/04/21 | North America / Mexico / Michoacan   | Human | Female | 60 | Hospitalized | Oropharyngeal swab |
| hCoV-19/Mexico/MIC-InDRE_FB14987_S2149/2021EPI_ISL_2340892 | 03/04/21 | North America / Mexico / Michoacan   | Human | Female | 45 | Deceased     | Oropharyngeal swab |
| hCoV-19/Mexico/MIC-InDRE_FB14990_S2151/2021EPI_ISL_2340893 | 11/04/21 | North America / Mexico / Michoacan   | Human | Male   | 55 | Released     | Oropharyngeal swab |
| hCoV-19/Mexico/MIC-InDRE_FB15000_S2154/2021EPI_ISL_2340894 | 16/04/21 | North America / Mexico / Michoacan   | Human | Male   | 33 | Deceased     | Oropharyngeal swab |
| hCoV-19/Mexico/MIC-InDRE_FB15003_S2156/2021EPI_ISL_2340895 | 17/04/21 | North America / Mexico / Michoacan   | Human | Male   | 62 | Deceased     | Oropharyngeal swab |
| hCoV-19/Mexico/MIC-InDRE_FB15006_S2157/2021EPI_ISL_2340896 | 18/04/21 | North America / Mexico / Michoacan   | Human | Male   | 59 | Released     | Oropharyngeal swab |
| hCoV-19/Mexico/MIC-InDRE_FB15012_S2160/2021EPI_ISL_2340897 | 21/04/21 | North America / Mexico / Michoacan   | Human | Male   | 47 | Released     | Oropharyngeal swab |
| hCoV-19/Mexico/MIC-InDRE_FB15017_S2161/2021EPI_ISL_2340898 | 22/04/21 | North America / Mexico / Michoacan   | Human | Male   | 79 | Hospitalized | Oropharyngeal swab |
| hCoV-19/Mexico/MIC-InDRE_FB15020_S2162/2021EPI_ISL_2340899 | 22/04/21 | North America / Mexico / Michoacan   | Human | Female | 57 | Deceased     | Oropharyngeal swab |
| hCoV-19/Mexico/MIC-InDRE_FB15021_S2163/2021EPI_ISL_2340900 | 21/04/21 | North America / Mexico / Michoacan   | Human | Male   | 43 | Deceased     | Oropharyngeal swab |
| hCoV-19/Mexico/MIC-InDRE_FB15024_S2164/2021EPI_ISL_2340901 | 21/04/21 | North America / Mexico / Michoacan   | Human | Male   | 56 | Released     | Oropharyngeal swab |
| hCoV-19/Mexico/MIC-InDRE_FB15027_S2165/2021EPI_ISL_2340902 | 22/04/21 | North America / Mexico / Michoacan   | Human | Male   | 40 | Released     | Oropharyngeal swab |
| 1CoV-19/Mexico/YUC-InDRE_FB15086_S2167/2021EPI_ISL_2340903 | 13/03/21 | North America / Mexico / Yucatan     | Human | Male   | 6  | Released     | Oropharyngeal swab |
| 1CoV-19/Mexico/YUC-InDRE_FB15088_S2168/2021EPI_ISL_2340904 | 13/03/21 | North America / Mexico / Yucatan     | Human | Male   | 63 | Released     | Oropharyngeal swab |
| 1CoV-19/Mexico/YUC-InDRE_FB15091_S2169/2021EPI_ISL_2340905 | 13/03/21 | North America / Mexico / Yucatan     | Human | Female | 51 | Released     | Oropharyngeal swab |
| 1CoV-19/Mexico/YUC-InDRE_FB15094_S2170/2021EPI_ISL_2340906 | 14/03/21 | North America / Mexico / Yucatan     | Human | Female | 57 | Released     | Oropharyngeal swab |
| 1CoV-19/Mexico/YUC-InDRE_FB15095_S2171/2021EPI_ISL_2340907 | 14/03/21 | North America / Mexico / Yucatan     | Human | Female | 38 | Released     | Oropharyngeal swab |
| 1CoV-19/Mexico/YUC-InDRE_FB15097_S2172/2021EPI_ISL_2340908 | 15/03/21 | North America / Mexico / Yucatan     | Human | Male   | 66 | Deceased     | Oropharyngeal swab |
| 1CoV-19/Mexico/YUC-InDRE_FB15099_S2174/2021EPI_ISL_2340909 | 16/03/21 | North America / Mexico / Yucatan     | Human | Male   | 59 | Released     | Oropharyngeal swab |
| 1CoV-19/Mexico/YUC-InDRE_FB15101_S2175/2021EPI_ISL_2340910 | 16/03/21 | North America / Mexico / Yucatan     | Human | Female | 46 | Released     | Oropharyngeal swab |
| 1CoV-19/Mexico/YUC-InDRE_FB15102_S2176/2021EPI_ISL_2340911 | 16/03/21 | North America / Mexico / Yucatan     | Human | Male   | 42 | Released     | Oropharyngeal swab |
| 1CoV-19/Mexico/YUC-InDRE_FB15103_S2177/2021EPI_ISL_2340912 | 16/03/21 | North America / Mexico / Yucatan     | Human | Male   | 83 | Deceased     | Oropharyngeal swab |
| 1CoV-19/Mexico/YUC-InDRE_FB15107_S2178/2021EPI_ISL_2340913 | 17/03/21 | North America / Mexico / Yucatan     | Human | Male   | 50 | Released     | Oropharyngeal swab |
| 1CoV-19/Mexico/YUC-InDRE_FB15108_S2179/2021EPI_ISL_2340914 | 17/03/21 | North America / Mexico / Yucatan     | Human | Female | 36 | Released     | Oropharyngeal swab |
| 1CoV-19/Mexico/YUC-InDRE_FB15115_S2180/2021EPI_ISL_2340915 | 18/03/21 | North America / Mexico / Yucatan     | Human | Male   | 15 | Released     | Oropharyngeal swab |
| 1CoV-19/Mexico/YUC-InDRE_FB15116_S2181/2021EPI_ISL_2340916 | 18/03/21 | North America / Mexico / Yucatan     | Human | Female | 33 | Released     | Oropharyngeal swab |
| 1CoV-19/Mexico/YUC-InDRE_FB15120_S2182/2021EPI_ISL_2340917 | 18/03/21 | North America / Mexico / Yucatan     | Human | Female | 32 | Released     | Oropharyngeal swab |
| 1CoV-19/Mexico/YUC-InDRE_FB15121_S2183/2021EPI_ISL_2340918 | 18/03/21 | North America / Mexico / Yucatan     | Human | Male   | 37 | Released     | Oropharyngeal swab |
| 1CoV-19/Mexico/YUC-InDRE_FB15122_S2184/2021EPI_ISL_2340919 | 18/03/21 | North America / Mexico / Yucatan     | Human | Male   | 62 | Released     | Oropharyngeal swab |
| 1CoV-19/Mexico/YUC-InDRE_FB15126_S2185/2021EPI_ISL_2340920 | 19/03/21 | North America / Mexico / Yucatan     | Human | Female | 37 | Released     | Oropharyngeal swab |
| 1CoV-19/Mexico/YUC-InDRE_FB15128_S2186/2021EPI_ISL_2340921 | 19/03/21 | North America / Mexico / Yucatan     | Human | Male   | 41 | Released     | Oropharyngeal swab |
| 1CoV-19/Mexico/YUC-InDRE_FB15130_S2187/2021EPI_ISL_2340922 | 19/03/21 | North America / Mexico / Yucatan     | Human | Female | 35 | Released     | Oropharyngeal swab |
| 1CoV-19/Mexico/YUC-InDRE_FB15138_S2188/2021EPI_ISL_2340923 | 21/03/21 | North America / Mexico / Yucatan     | Human | Male   | 51 | Deceased     | Oropharyngeal swab |
| 1CoV-19/Mexico/YUC-InDRE_FB15141_S2189/2021EPI_ISL_2340924 | 21/03/21 | North America / Mexico / Yucatan     | Human | Male   | 70 | Released     | Oropharyngeal swab |
| 1CoV-19/Mexico/YUC-InDRE_FB15142_S2190/2021EPI_ISL_2340925 | 22/03/21 | North America / Mexico / Yucatan     | Human | Male   | 66 | Deceased     | Oropharyngeal swab |

|                                                            |          |                                     |       |        |    |              |                    |
|------------------------------------------------------------|----------|-------------------------------------|-------|--------|----|--------------|--------------------|
| 1CoV-19/Mexico/YUC-IndRE_FB15143_S2191/2021EPI_ISL_2340926 | 22/03/21 | North America / Mexico / Yucatan    | Human | Male   | 56 | Released     | Oropharyngeal swab |
| 1CoV-19/Mexico/YUC-IndRE_FB15145_S2192/2021EPI_ISL_2340927 | 22/03/21 | North America / Mexico / Yucatan    | Human | Male   | 29 | Released     | Oropharyngeal swab |
| 1CoV-19/Mexico/YUC-IndRE_FB15146_S2193/2021EPI_ISL_2340928 | 22/03/21 | North America / Mexico / Yucatan    | Human | Female | 29 | Released     | Oropharyngeal swab |
| 1CoV-19/Mexico/YUC-IndRE_FB15149_S2194/2021EPI_ISL_2340929 | 22/03/21 | North America / Mexico / Yucatan    | Human | Male   | 49 | Released     | Oropharyngeal swab |
| 1CoV-19/Mexico/YUC-IndRE_FB15150_S2195/2021EPI_ISL_2340930 | 22/03/21 | North America / Mexico / Yucatan    | Human | Female | 60 | Released     | Oropharyngeal swab |
| 1CoV-19/Mexico/YUC-IndRE_FB15151_S2196/2021EPI_ISL_2340931 | 23/03/21 | North America / Mexico / Yucatan    | Human | Male   | 53 | Deceased     | Oropharyngeal swab |
| 1CoV-19/Mexico/YUC-IndRE_FB15153_S2197/2021EPI_ISL_2340932 | 24/03/21 | North America / Mexico / Yucatan    | Human | Male   | 36 | Released     | Oropharyngeal swab |
| 1CoV-19/Mexico/YUC-IndRE_FB15154_S2198/2021EPI_ISL_2340933 | 23/03/21 | North America / Mexico / Yucatan    | Human | Female | 27 | Released     | Oropharyngeal swab |
| 1CoV-19/Mexico/YUC-IndRE_FB15155_S2199/2021EPI_ISL_2340934 | 23/03/21 | North America / Mexico / Yucatan    | Human | Female | 15 | Released     | Oropharyngeal swab |
| 1CoV-19/Mexico/YUC-IndRE_FB15156_S2200/2021EPI_ISL_2340935 | 23/03/21 | North America / Mexico / Yucatan    | Human | Male   | 47 | Released     | Oropharyngeal swab |
| 1CoV-19/Mexico/YUC-IndRE_FB15157_S2201/2021EPI_ISL_2340936 | 24/03/21 | North America / Mexico / Yucatan    | Human | Male   | 27 | Released     | Oropharyngeal swab |
| 1CoV-19/Mexico/YUC-IndRE_FB15159_S2202/2021EPI_ISL_2340937 | 23/03/21 | North America / Mexico / Yucatan    | Human | Female | 25 | Released     | Oropharyngeal swab |
| 1CoV-19/Mexico/YUC-IndRE_FB15166_S2203/2021EPI_ISL_2340938 | 23/03/21 | North America / Mexico / Yucatan    | Human | Female | 69 | Deceased     | Oropharyngeal swab |
| 1CoV-19/Mexico/YUC-IndRE_FB15176_S2204/2021EPI_ISL_2340939 | 25/03/21 | North America / Mexico / Yucatan    | Human | Male   | 49 | Released     | Oropharyngeal swab |
| 1CoV-19/Mexico/YUC-IndRE_FB15177_S2205/2021EPI_ISL_2340940 | 24/03/21 | North America / Mexico / Yucatan    | Human | Female | 74 | Hospitalized | Oropharyngeal swab |
| 1CoV-19/Mexico/YUC-IndRE_FB15181_S2207/2021EPI_ISL_2340941 | 26/03/21 | North America / Mexico / Yucatan    | Human | Female | 46 | Released     | Oropharyngeal swab |
| 1CoV-19/Mexico/GUA-IndRE_FB13382_S2208/2021EPI_ISL_2340942 | 14/04/21 | North America / Mexico / Guanajuato | Human | Female | 47 | Released     | Oropharyngeal swab |
| 1CoV-19/Mexico/GUA-IndRE_FB13858_S2211/2021EPI_ISL_2340943 | 18/04/21 | North America / Mexico / Guanajuato | Human | Male   | 56 | Deceased     | Oropharyngeal swab |
| 1CoV-19/Mexico/GUA-IndRE_FB13862_S2214/2021EPI_ISL_2340944 | 18/04/21 | North America / Mexico / Guanajuato | Human | Male   | 76 | Hospitalized | Oropharyngeal swab |
| 1CoV-19/Mexico/GUA-IndRE_FB13901_S2215/2021EPI_ISL_2340945 | 20/04/21 | North America / Mexico / Guanajuato | Human | Female | 60 | Released     | Oropharyngeal swab |
| 1CoV-19/Mexico/GUA-IndRE_FB13920_S2216/2021EPI_ISL_2340946 | 22/04/21 | North America / Mexico / Guanajuato | Human | Male   | 51 | Released     | Oropharyngeal swab |
| 1CoV-19/Mexico/GUA-IndRE_FB13919_S2219/2021EPI_ISL_2340947 | 22/04/21 | North America / Mexico / Guanajuato | Human | Female | 59 | Released     | Oropharyngeal swab |
| 1CoV-19/Mexico/GUA-IndRE_FB13930_S2221/2021EPI_ISL_2340948 | 22/04/21 | North America / Mexico / Guanajuato | Human | Male   | 52 | Hospitalized | Oropharyngeal swab |
| 1CoV-19/Mexico/GUA-IndRE_FB13931_S2222/2021EPI_ISL_2340949 | 22/04/21 | North America / Mexico / Guanajuato | Human | Male   | 70 | Hospitalized | Oropharyngeal swab |
| 1CoV-19/Mexico/PUE-IndRE_FB13949_S2223/2021EPI_ISL_2340950 | 21/04/21 | North America / Mexico / Puebla     | Human | Female | 35 | Released     | Oropharyngeal swab |
| 1CoV-19/Mexico/PUE-IndRE_FB13952_S2224/2021EPI_ISL_2340951 | 21/04/21 | North America / Mexico / Puebla     | Human | Male   | 60 | Hospitalized | Oropharyngeal swab |
| 1CoV-19/Mexico/PUE-IndRE_FB13953_S2225/2021EPI_ISL_2340952 | 21/04/21 | North America / Mexico / Puebla     | Human | Male   | 39 | Hospitalized | Oropharyngeal swab |
| 1CoV-19/Mexico/PUE-IndRE_FB13955_S2226/2021EPI_ISL_2340953 | 23/04/21 | North America / Mexico / Puebla     | Human | Male   | 60 | Hospitalized | Oropharyngeal swab |
| 1CoV-19/Mexico/PUE-IndRE_FB13956_S2227/2021EPI_ISL_2340954 | 24/04/21 | North America / Mexico / Puebla     | Human | Female | 23 | Hospitalized | Oropharyngeal swab |
| hCoV-19/Mexico/HID-IndRE_FB13986_S2228/2021EPI_ISL_2340955 | 15/04/21 | North America / Mexico / Hidalgo    | Human | Male   | 52 | Deceased     | Oropharyngeal swab |
| hCoV-19/Mexico/HID-IndRE_FB13987_S2229/2021EPI_ISL_2340956 | 13/04/21 | North America / Mexico / Hidalgo    | Human | Male   | 51 | Released     | Oropharyngeal swab |
| hCoV-19/Mexico/HID-IndRE_FB13990_S2230/2021EPI_ISL_2340957 | 23/04/21 | North America / Mexico / Hidalgo    | Human | Female | 70 | Released     | Oropharyngeal swab |
| hCoV-19/Mexico/HID-IndRE_FB13992_S2231/2021EPI_ISL_2340958 | 19/04/21 | North America / Mexico / Hidalgo    | Human | Female | 31 | Released     | Oropharyngeal swab |
| 1CoV-19/Mexico/QUE-IndRE_FB13998_S2232/2021EPI_ISL_2340959 | 20/04/21 | North America / Mexico / Queretaro  | Human | Male   | 41 | Released     | Oropharyngeal swab |
| hCoV-19/Mexico/SIN-IndRE_FB15072_S2234/2021EPI_ISL_2340960 | 03/05/21 | North America / Mexico / Sinaloa    | Human | Male   | 75 | Deceased     | Oropharyngeal swab |
| hCoV-19/Mexico/SIN-IndRE_FB15073_S2235/2021EPI_ISL_2340961 | 04/05/21 | North America / Mexico / Sinaloa    | Human | Female | 79 | Deceased     | Oropharyngeal swab |
| 1CoV-19/Mexico/QUE-IndRE_FB14005_S2237/2021EPI_ISL_2340962 | 22/04/21 | North America / Mexico / Queretaro  | Human | Male   | 53 | Hospitalized | Oropharyngeal swab |
| 1CoV-19/Mexico/QUE-IndRE_FB14007_S2238/2021EPI_ISL_2340963 | 24/04/21 | North America / Mexico / Queretaro  | Human | Male   | 33 | Released     | Oropharyngeal swab |
| 1CoV-19/Mexico/QUE-IndRE_FB14009_S2239/2021EPI_ISL_2340964 | 24/04/21 | North America / Mexico / Queretaro  | Human | Female | 38 | Released     | Oropharyngeal swab |
| 1CoV-19/Mexico/QUE-IndRE_FB14011_S2240/2021EPI_ISL_2340965 | 26/04/21 | North America / Mexico / Queretaro  | Human | Male   | 40 | Hospitalized | Oropharyngeal swab |
| 1CoV-19/Mexico/QUE-IndRE_FB14012_S2241/2021EPI_ISL_2340966 | 26/04/21 | North America / Mexico / Queretaro  | Human | Male   | 47 | Released     | Oropharyngeal swab |
| 1CoV-19/Mexico/QUE-IndRE_FB14015_S2242/2021EPI_ISL_2340967 | 26/04/21 | North America / Mexico / Queretaro  | Human | Female | 32 | Released     | Oropharyngeal swab |
| 1CoV-19/Mexico/QUE-IndRE_FB14017_S2243/2021EPI_ISL_2340968 | 24/04/21 | North America / Mexico / Queretaro  | Human | Male   | 66 | Released     | Oropharyngeal swab |
| 1CoV-19/Mexico/VER-IndRE_FB14022_S2244/2021EPI_ISL_2340969 | 20/04/21 | North America / Mexico / Veracruz   | Human | Male   | 44 | Deceased     | Oropharyngeal swab |

|                                                            |          |                                              |       |        |    |              |                    |
|------------------------------------------------------------|----------|----------------------------------------------|-------|--------|----|--------------|--------------------|
| 1CoV-19/Mexico/VER-InDRE_FB14023_S2245/2021EPI_ISL_2340970 | 19/04/21 | North America / Mexico / Veracruz            | Human | Male   | 41 | Deceased     | Oropharyngeal swab |
| 1CoV-19/Mexico/VER-InDRE_FB14027_S2246/2021EPI_ISL_2340971 | 24/04/21 | North America / Mexico / Veracruz            | Human | Male   | 54 | Hospitalized | Oropharyngeal swab |
| hCoV-19/Mexico/SIN-InDRE_FB14028_S2247/2021EPI_ISL_2340972 | 19/04/21 | North America / Mexico / Sinaloa             | Human | Male   | 2  | Released     | Oropharyngeal swab |
| hCoV-19/Mexico/SIN-InDRE_FB14029_S2248/2021EPI_ISL_2340973 | 21/04/21 | North America / Mexico / Sinaloa             | Human | Male   | 44 | Released     | Oropharyngeal swab |
| 1CoV-19/Mexico/TAM-InDRE_FB14050_S2250/2021EPI_ISL_2340974 | 16/04/21 | North America / Mexico / Tamaulipas          | Human | Male   | 55 | Hospitalized | Oropharyngeal swab |
| 1CoV-19/Mexico/TAM-InDRE_FB14058_S2251/2021EPI_ISL_2340975 | 14/04/21 | North America / Mexico / Tamaulipas          | Human | Female | 74 | Released     | Oropharyngeal swab |
| 1CoV-19/Mexico/CMX-InDRE_FB14073_S2253/2021EPI_ISL_2340976 | 19/04/21 | North America / Mexico / Mexico City         | Human | Female | 81 | Deceased     | Oropharyngeal swab |
| 1CoV-19/Mexico/CMX-InDRE_FB14075_S2254/2021EPI_ISL_2340977 | 23/04/21 | North America / Mexico / Mexico City         | Human | Male   | 42 | Hospitalized | Oropharyngeal swab |
| 1CoV-19/Mexico/SON-InDRE_FB14082_S2255/2021EPI_ISL_2340978 | 19/04/21 | North America / Mexico / Sonora              | Human | Male   | 48 | Released     | Oropharyngeal swab |
| 1CoV-19/Mexico/BCN-InDRE_FB14091_S2257/2021EPI_ISL_2340979 | 23/04/21 | North America / Mexico / Baja California     | Human | Male   | 74 | Hospitalized | Oropharyngeal swab |
| 1CoV-19/Mexico/GUA-InDRE_FB13866_S2258/2021EPI_ISL_2340980 | 18/04/21 | North America / Mexico / Guanajuato          | Human | Male   | 80 | Released     | Oropharyngeal swab |
| 1CoV-19/Mexico/GUA-InDRE_FB13923_S2259/2021EPI_ISL_2340981 | 21/04/21 | North America / Mexico / Guanajuato          | Human | Female | 34 | Released     | Oropharyngeal swab |
| 1CoV-19/Mexico/GUA-InDRE_FB13934_S2261/2021EPI_ISL_2340982 | 22/04/21 | North America / Mexico / Guanajuato          | Human | Female | 21 | Released     | Oropharyngeal swab |
| 1CoV-19/Mexico/GUA-InDRE_FB13898_S2262/2021EPI_ISL_2340983 | 20/04/21 | North America / Mexico / Guanajuato          | Human | Female | 33 | Released     | Oropharyngeal swab |
| 1CoV-19/Mexico/GUA-InDRE_FB13911_S2264/2021EPI_ISL_2340984 | 21/04/21 | North America / Mexico / Guanajuato          | Human | Male   | 26 | Released     | Oropharyngeal swab |
| 1CoV-19/Mexico/GUA-InDRE_FB13921_S2265/2021EPI_ISL_2340985 | 22/04/21 | North America / Mexico / Guanajuato          | Human | Female | 37 | Released     | Oropharyngeal swab |
| 1CoV-19/Mexico/GUA-InDRE_FB13925_S2266/2021EPI_ISL_2340986 | 22/04/21 | North America / Mexico / Guanajuato          | Human | Female | 47 | Released     | Oropharyngeal swab |
| 1CoV-19/Mexico/GUA-InDRE_FB13875_S2267/2021EPI_ISL_2340987 | 19/04/21 | North America / Mexico / Guanajuato          | Human | Female | 62 | Released     | Oropharyngeal swab |
| 1CoV-19/Mexico/GUA-InDRE_FB13906_S2268/2021EPI_ISL_2340988 | 21/04/21 | North America / Mexico / Guanajuato          | Human | Female | 46 | Released     | Oropharyngeal swab |
| 1CoV-19/Mexico/GUA-InDRE_FB13932_S2269/2021EPI_ISL_2340989 | 22/04/21 | North America / Mexico / Guanajuato          | Human | Female | 10 | Released     | Oropharyngeal swab |
| 1CoV-19/Mexico/GUA-InDRE_FB13915_S2270/2021EPI_ISL_2340990 | 21/04/21 | North America / Mexico / Guanajuato          | Human | Female | 56 | Released     | Oropharyngeal swab |
| 1CoV-19/Mexico/GUA-InDRE_FB13917_S2271/2021EPI_ISL_2340991 | 21/04/21 | North America / Mexico / Guanajuato          | Human | Male   | 36 | Released     | Oropharyngeal swab |
| 1CoV-19/Mexico/GUA-InDRE_FB13918_S2272/2021EPI_ISL_2340992 | 21/04/21 | North America / Mexico / Guanajuato          | Human | Female | 65 | Released     | Oropharyngeal swab |
| 1CoV-19/Mexico/GUA-InDRE_FB13933_S2274/2021EPI_ISL_2340993 | 22/04/21 | North America / Mexico / Guanajuato          | Human | Male   | 46 | Released     | Oropharyngeal swab |
| 1CoV-19/Mexico/GUA-InDRE_FB13861_S2275/2021EPI_ISL_2340994 | 16/04/21 | North America / Mexico / Guanajuato          | Human | Female | 34 | Released     | Oropharyngeal swab |
| 1CoV-19/Mexico/GUA-InDRE_FB13927_S2276/2021EPI_ISL_2340995 | 22/04/21 | North America / Mexico / Guanajuato          | Human | Female | 18 | Released     | Oropharyngeal swab |
| 1CoV-19/Mexico/GUA-InDRE_FB13894_S2278/2021EPI_ISL_2340996 | 20/04/21 | North America / Mexico / Guanajuato          | Human | Male   | 36 | Released     | Oropharyngeal swab |
| 1CoV-19/Mexico/TAM-InDRE_FB14047_S2279/2021EPI_ISL_2340997 | 13/04/21 | North America / Mexico / Tamaulipas          | Human | Female | 51 | Hospitalized | Oropharyngeal swab |
| 1CoV-19/Mexico/YUC-InDRE_FB15326_S2280/2021EPI_ISL_2340998 | 07/04/21 | North America / Mexico / Yucatan             | Human | Female | 49 | Released     | Oropharyngeal swab |
| 1CoV-19/Mexico/YUC-InDRE_FB15336_S2281/2021EPI_ISL_2340999 | 08/04/21 | North America / Mexico / Yucatan             | Human | Female | 48 | Hospitalized | Oropharyngeal swab |
| 1CoV-19/Mexico/YUC-InDRE_FB15337_S2282/2021EPI_ISL_2341000 | 08/04/21 | North America / Mexico / Yucatan             | Human | Male   | 58 | Deceased     | Oropharyngeal swab |
| 1CoV-19/Mexico/YUC-InDRE_FB15343_S2283/2021EPI_ISL_2341001 | 09/04/21 | North America / Mexico / Yucatan             | Human | Female | 49 | Deceased     | Oropharyngeal swab |
| 1CoV-19/Mexico/YUC-InDRE_FB15365_S2284/2021EPI_ISL_2341002 | 14/04/21 | North America / Mexico / Yucatan             | Human | Male   | 65 | Released     | Oropharyngeal swab |
| 1CoV-19/Mexico/YUC-InDRE_FB15367_S2285/2021EPI_ISL_2341003 | 14/04/21 | North America / Mexico / Yucatan             | Human | Female | 54 | Hospitalized | Oropharyngeal swab |
| 1CoV-19/Mexico/YUC-InDRE_FB15388_S2286/2021EPI_ISL_2341004 | 21/04/21 | North America / Mexico / Yucatan             | Human | Male   | 29 | Released     | Oropharyngeal swab |
| 1CoV-19/Mexico/YUC-InDRE_FB15391_S2287/2021EPI_ISL_2341005 | 21/04/21 | North America / Mexico / Yucatan             | Human | Male   | 8  | Released     | Oropharyngeal swab |
| 1CoV-19/Mexico/CMX-InDRE_FB15449_S2288/2021EPI_ISL_2341006 | 04/05/21 | North America / Mexico / Mexico City         | Human | Female | 41 | Released     | Oropharyngeal swab |
| hCoV-19/Mexico/JAL-InDRE_FB14276_S2289/2021EPI_ISL_2341007 | 01/05/21 | North America / Mexico / Jalisco             | Human | Male   | 37 | Hospitalized | Oropharyngeal swab |
| 1CoV-19/Mexico/QUE-InDRE_FB14547_S2290/2021EPI_ISL_2341008 | 01/05/21 | North America / Mexico / Queretaro           | Human | Male   | 52 | Released     | Oropharyngeal swab |
| 1CoV-19/Mexico/GUA-InDRE_FB14633_S2292/2021EPI_ISL_2341009 | 30/04/21 | North America / Mexico / Guanajuato          | Human | Male   | 35 | Released     | Oropharyngeal swab |
| 1CoV-19/Mexico/GUA-InDRE_FB14635_S2293/2021EPI_ISL_2341010 | 30/04/21 | North America / Mexico / Guanajuato          | Human | Male   | 65 | Released     | Oropharyngeal swab |
| 1CoV-19/Mexico/GUA-InDRE_FB14640_S2294/2021EPI_ISL_2341011 | 30/04/21 | North America / Mexico / Guanajuato          | Human | Male   | 34 | Released     | Oropharyngeal swab |
| 1CoV-19/Mexico/GUA-InDRE_FB14643_S2295/2021EPI_ISL_2341012 | 30/04/21 | North America / Mexico / Guanajuato          | Human | Female | 39 | Released     | Oropharyngeal swab |
| 1CoV-19/Mexico/BCS-InDRE_FB14661_S2296/2021EPI_ISL_2341013 | 01/05/21 | North America / Mexico / Baja California Sur | Human | Male   | 24 | Released     | Oropharyngeal swab |



|                                                            |          |                                          |       |        |    |              |                    |
|------------------------------------------------------------|----------|------------------------------------------|-------|--------|----|--------------|--------------------|
| 1CoV-19/Mexico/MOR-InDRE_FB14784_S2298/2021EPI_ISL_2341014 | 06/05/21 | North America / Mexico / Morelos         | Human | Male   | 67 | Hospitalized | Oropharyngeal swab |
| 1CoV-19/Mexico/MOR-InDRE_FB14789_S2299/2021EPI_ISL_2341015 | 07/05/21 | North America / Mexico / Morelos         | Human | Female | 63 | Hospitalized | Oropharyngeal swab |
| 1CoV-19/Mexico/GUA-InDRE_FB14799_S2300/2021EPI_ISL_2341016 | 03/05/21 | North America / Mexico / Guanajuato      | Human | Female | 25 | Released     | Oropharyngeal swab |
| 1CoV-19/Mexico/GUA-InDRE_FB14801_S2301/2021EPI_ISL_2341017 | 03/05/21 | North America / Mexico / Guanajuato      | Human | Female | 42 | Released     | Oropharyngeal swab |
| 1CoV-19/Mexico/GUA-InDRE_FB14802_S2302/2021EPI_ISL_2341018 | 03/05/21 | North America / Mexico / Guanajuato      | Human | Female | 25 | Released     | Oropharyngeal swab |
| 1CoV-19/Mexico/GUA-InDRE_FB14810_S2303/2021EPI_ISL_2341019 | 04/05/21 | North America / Mexico / Guanajuato      | Human | Male   | 55 | Released     | Oropharyngeal swab |
| 1CoV-19/Mexico/GUA-InDRE_FB14834_S2304/2021EPI_ISL_2341020 | 07/05/21 | North America / Mexico / Guanajuato      | Human | Male   | 29 | Released     | Oropharyngeal swab |
| 1CoV-19/Mexico/NLE-InDRE_FB14850_S2305/2021EPI_ISL_2341021 | 04/05/21 | North America / Mexico / Nuevo Leon      | Human | Female | 48 | Released     | Oropharyngeal swab |
| 1CoV-19/Mexico/NLE-InDRE_FB14852_S2306/2021EPI_ISL_2341022 | 06/05/21 | North America / Mexico / Nuevo Leon      | Human | Male   | 27 | Released     | Oropharyngeal swab |
| 1CoV-19/Mexico/CAM-InDRE_FB14876_S2307/2021EPI_ISL_2341023 | 04/05/21 | North America / Mexico / Campeche        | Human | Male   | 36 | Released     | Oropharyngeal swab |
| 1CoV-19/Mexico/YUC-InDRE_FB15192_S2308/2021EPI_ISL_2341024 | 29/03/21 | North America / Mexico / Yucatan         | Human | Male   | 78 | Hospitalized | Oropharyngeal swab |
| 1CoV-19/Mexico/YUC-InDRE_FB15219_S2309/2021EPI_ISL_2341025 | 30/03/21 | North America / Mexico / Yucatan         | Human | Male   | 40 | Hospitalized | Oropharyngeal swab |
| 1CoV-19/Mexico/YUC-InDRE_FB15278_S2310/2021EPI_ISL_2341026 | 01/04/21 | North America / Mexico / Yucatan         | Human | Female | 55 | Released     | Oropharyngeal swab |
| 1CoV-19/Mexico/YUC-InDRE_FB15287_S2311/2021EPI_ISL_2341027 | 03/04/21 | North America / Mexico / Yucatan         | Human | Male   | 46 | Deceased     | Oropharyngeal swab |
| hCoV-19/Mexico/MEX-INMEGEN-05-03-139/2021 EPI_ISL_2341043  | 09/05/21 | North America / Mexico / State of Mexico | Human | Female | 46 | unknown      | Oropharyngeal swab |
| hCoV-19/Mexico/CMX-INMEGEN-05-03-147/2021 EPI_ISL_2341044  | 09/05/21 | North America / Mexico / Mexico City     | Human | Female | 34 | unknown      | Oropharyngeal swab |
| hCoV-19/Mexico/MEX-INMEGEN-05-03-74/2021 EPI_ISL_2341045   | 08/05/21 | North America / Mexico / State of Mexico | Human | Male   | 45 | unknown      | Oropharyngeal swab |
| hCoV-19/Mexico/CMX-INER-INMEGEN-00209/2021 EPI_ISL_2341316 | 16/04/21 | North America / Mexico / Mexico City     | Human | Male   | 23 | unknown      |                    |
| hCoV-19/Mexico/CMX-INER-INMEGEN-00201/2021 EPI_ISL_2341318 | 15/04/21 | North America / Mexico / Mexico City     | Human | Male   | 28 | unknown      |                    |
| hCoV-19/Mexico/CMX-INER-INMEGEN-00190/2021 EPI_ISL_2341319 | 15/04/21 | North America / Mexico / Mexico City     | Human | Female | 37 | unknown      |                    |
| hCoV-19/Mexico/CMX-INER-INMEGEN-00206/2021 EPI_ISL_2341320 | 15/04/21 | North America / Mexico / Mexico City     | Human | Female | 26 | unknown      |                    |
| hCoV-19/Mexico/CMX-INER-INMEGEN-00191/2021 EPI_ISL_2341321 | 15/04/21 | North America / Mexico / Mexico City     | Human | Female | 47 | unknown      |                    |
| hCoV-19/Mexico/CMX-INER-INMEGEN-00192/2021 EPI_ISL_2341322 | 15/04/21 | North America / Mexico / Mexico City     | Human | Male   | 12 | unknown      |                    |
| hCoV-19/Mexico/CMX-INER-INMEGEN-00195/2021 EPI_ISL_2341324 | 15/04/21 | North America / Mexico / Mexico City     | Human | Female | 68 | unknown      |                    |
| hCoV-19/Mexico/CMX-INER-INMEGEN-00196/2021 EPI_ISL_2341325 | 15/04/21 | North America / Mexico / Mexico City     | Human | Female | 83 | unknown      |                    |
| hCoV-19/Mexico/CMX-INER-INMEGEN-00197/2021 EPI_ISL_2341326 | 15/04/21 | North America / Mexico / Mexico City     | Human | Male   | 60 | unknown      |                    |
| hCoV-19/Mexico/CMX-INER-INMEGEN-00198/2021 EPI_ISL_2341327 | 15/04/21 | North America / Mexico / Mexico City     | Human | Female | 53 | unknown      |                    |
| hCoV-19/Mexico/CMX-INER-INMEGEN-00199/2021 EPI_ISL_2341328 | 15/04/21 | North America / Mexico / Mexico City     | Human | Male   | 50 | unknown      |                    |
| hCoV-19/Mexico/CMX-INER-INMEGEN-00200/2021 EPI_ISL_2341329 | 15/04/21 | North America / Mexico / Mexico City     | Human | Male   | 25 | unknown      |                    |
| hCoV-19/Mexico/CMX-INER-INMEGEN-00202/2021 EPI_ISL_2341330 | 15/04/21 | North America / Mexico / Mexico City     | Human | Male   | 56 | unknown      |                    |
| hCoV-19/Mexico/CMX-INER-INMEGEN-00204/2021 EPI_ISL_2341331 | 15/04/21 | North America / Mexico / Mexico City     | Human | Female | 23 | unknown      |                    |
| hCoV-19/Mexico/CMX-INER-INMEGEN-00205/2021 EPI_ISL_2341332 | 15/04/21 | North America / Mexico / Mexico City     | Human | Female | 48 | unknown      |                    |
| hCoV-19/Mexico/CMX-INER-INMEGEN-00207/2021 EPI_ISL_2341333 | 16/04/21 | North America / Mexico / Mexico City     | Human | Female | 26 | unknown      |                    |
| hCoV-19/Mexico/CMX-INER-INMEGEN-00208/2021 EPI_ISL_2341334 | 16/04/21 | North America / Mexico / Mexico City     | Human | Male   | 58 | unknown      |                    |
| hCoV-19/Mexico/CMX-INER-INMEGEN-00210/2021 EPI_ISL_2341335 | 16/04/21 | North America / Mexico / Mexico City     | Human | Male   | 33 | unknown      |                    |
| hCoV-19/Mexico/CMX-INER-INMEGEN-00211/2021 EPI_ISL_2341336 | 16/04/21 | North America / Mexico / Mexico City     | Human | Male   | 26 | unknown      |                    |
| hCoV-19/Mexico/CMX-INER-INMEGEN-00212/2021 EPI_ISL_2341337 | 16/04/21 | North America / Mexico / Mexico City     | Human | Male   | 32 | unknown      |                    |
| hCoV-19/Mexico/CMX-INER-INMEGEN-00213/2021 EPI_ISL_2341338 | 16/04/21 | North America / Mexico / Mexico City     | Human | Female | 32 | unknown      |                    |
| hCoV-19/Mexico/CMX-INER-INMEGEN-00215/2021 EPI_ISL_2341340 | 16/04/21 | North America / Mexico / Mexico City     | Human | Female | 47 | unknown      |                    |
| hCoV-19/Mexico/CMX-INER-INMEGEN-00216/2021 EPI_ISL_2341341 | 16/04/21 | North America / Mexico / Mexico City     | Human | Female | 26 | unknown      |                    |
| hCoV-19/Mexico/CMX-INER-INMEGEN-00217/2021 EPI_ISL_2341342 | 16/04/21 | North America / Mexico / Mexico City     | Human | Female | 44 | unknown      |                    |
| hCoV-19/Mexico/CMX-INER-INMEGEN-00218/2021 EPI_ISL_2341343 | 16/04/21 | North America / Mexico / Mexico City     | Human | Male   | 27 | unknown      |                    |
| hCoV-19/Mexico/CMX-INER-INMEGEN-00219/2021 EPI_ISL_2341344 | 16/04/21 | North America / Mexico / Mexico City     | Human | Male   | 44 | unknown      |                    |
| hCoV-19/Mexico/CMX-INER-INMEGEN-00220/2021 EPI_ISL_2341345 | 16/04/21 | North America / Mexico / Mexico City     | Human | Male   | 52 | unknown      |                    |

|                                             |                 |          |                                      |       |        |    |              |                    |
|---------------------------------------------|-----------------|----------|--------------------------------------|-------|--------|----|--------------|--------------------|
| hCoV-19/Mexico/CMX-INER-INMEGEN-00221/2021  | EPI_ISL_2341346 | 19/04/21 | North America / Mexico / Mexico City | Human | Female | 43 | unknown      |                    |
| CoV-19/Mexico/QUE-InDRE_FB14013_S2348/2021  | EPI_ISL_2342981 | 26/04/21 | North America / Mexico / Queretaro   | Human | Female | 59 | Released     | Oropharyngeal swab |
| CoV-19/Mexico/YUC-InDRE_FB15104_S2327/2021  | EPI_ISL_2342982 | 17/03/21 | North America / Mexico / Yucatan     | Human | Male   | 43 | Released     | Oropharyngeal swab |
| CoV-19/Mexico/TAM-InDRE_FB14048_S2352/2021  | EPI_ISL_2342984 | 13/04/21 | North America / Mexico / Tamaulipas  | Human | Male   | 61 | Hospitalized | Oropharyngeal swab |
| CoV-19/Mexico/GUA-InDRE_FB13936_S2363/2021  | EPI_ISL_2342988 | 23/04/21 | North America / Mexico / Guanajuato  | Human | Female | 55 | Released     | Oropharyngeal swab |
| CoV-19/Mexico/CMX-InDRE_FB14729_S2312/2021  | EPI_ISL_2342989 | 23/04/21 | North America / Mexico / Mexico City | Human | Female | 72 | Released     | Oropharyngeal swab |
| CoV-19/Mexico/CMX-InDRE_FB14732_S2314/2021  | EPI_ISL_2342990 | 29/04/21 | North America / Mexico / Mexico City | Human | Female | 71 | Released     | Oropharyngeal swab |
| hCoV-19/Mexico/MIC-InDRE_FB15014_S2322/2021 | EPI_ISL_2342991 | 19/04/21 | North America / Mexico / Michoacan   | Human | Male   | 49 | Hospitalized | Oropharyngeal swab |
| hCoV-19/Mexico/MIC-InDRE_FB15018_S2323/2021 | EPI_ISL_2342992 | 22/04/21 | North America / Mexico / Michoacan   | Human | Male   | 21 | Released     | Oropharyngeal swab |
| hCoV-19/Mexico/SIN-InDRE_FB15069_S2340/2021 | EPI_ISL_2342993 | 03/05/21 | North America / Mexico / Sinaloa     | Human | Male   | 74 | Released     | Oropharyngeal swab |
| CoV-19/Mexico/QUE-InDRE_FB14004_S2346/2021  | EPI_ISL_2342994 | 22/04/21 | North America / Mexico / Queretaro   | Human | Female | 50 | Hospitalized | Oropharyngeal swab |
| CoV-19/Mexico/CMX-InDRE_FB14730_S2313/2021  | EPI_ISL_2343006 | 23/04/21 | North America / Mexico / Mexico City | Human | Female | 66 | Released     | Oropharyngeal swab |
| CoV-19/Mexico/CMX-InDRE_FB15448_S2366/2021  | EPI_ISL_2343007 | 05/04/21 | North America / Mexico / Mexico City | Human | Female | 53 | Released     | Oropharyngeal swab |
| hCoV-19/Mexico/MIC-InDRE_FB14997_S2318/2021 | EPI_ISL_2343011 | 10/04/21 | North America / Mexico / Michoacan   | Human | Male   | 74 | Deceased     | Oropharyngeal swab |
| hCoV-19/Mexico/MIC-InDRE_FB15004_S2320/2021 | EPI_ISL_2343013 | 17/04/21 | North America / Mexico / Michoacan   | Human | Male   | 81 | Hospitalized | Oropharyngeal swab |
| hCoV-19/Mexico/MIC-InDRE_FB15013_S2321/2021 | EPI_ISL_2343014 | 19/04/21 | North America / Mexico / Michoacan   | Human | Female | 49 | Released     | Oropharyngeal swab |
| hCoV-19/Mexico/MIC-InDRE_FB15019_S2324/2021 | EPI_ISL_2343015 | 22/04/21 | North America / Mexico / Michoacan   | Human | Male   | 48 | Released     | Oropharyngeal swab |
| CoV-19/Mexico/COL-InDRE_FB15040_S2326/2021  | EPI_ISL_2343017 | 06/05/21 | North America / Mexico / Colima      | Human | Male   | 54 | Deceased     | Oropharyngeal swab |
| CoV-19/Mexico/YUC-InDRE_FB15140_S2336/2021  | EPI_ISL_2343018 | 22/03/21 | North America / Mexico / Yucatan     | Human | Female | 50 | Released     | Oropharyngeal swab |
| CoV-19/Mexico/VER-InDRE_FB14021_S2349/2021  | EPI_ISL_2343021 | 19/04/21 | North America / Mexico / Veracruz    | Human | Male   | 42 | Released     | Oropharyngeal swab |
| hCoV-19/Mexico/SIN-InDRE_FB14035_S2350/2021 | EPI_ISL_2343022 | 24/04/21 | North America / Mexico / Sinaloa     | Human | Male   | 72 | Hospitalized | Oropharyngeal swab |
| CoV-19/Mexico/TAM-InDRE_FB14056_S2355/2021  | EPI_ISL_2343023 | 17/04/21 | North America / Mexico / Tamaulipas  | Human | Male   | 66 | Hospitalized | Oropharyngeal swab |
| CoV-19/Mexico/CHP-InDRE_FB14081_S2357/2021  | EPI_ISL_2343024 | 25/04/21 | North America / Mexico / Chiapas     | Human | Male   | 57 | Hospitalized | Oropharyngeal swab |
| CoV-19/Mexico/SON-InDRE_FB14083_S2358/2021  | EPI_ISL_2343025 | 20/04/21 | North America / Mexico / Sonora      | Human | Male   | 42 | Released     | Oropharyngeal swab |
| CoV-19/Mexico/GUA-InDRE_FB13871_S2360/2021  | EPI_ISL_2343026 | 19/04/21 | North America / Mexico / Guanajuato  | Human | Female | 50 | Released     | Oropharyngeal swab |
| CoV-19/Mexico/GUA-InDRE_FB13869_S2362/2021  | EPI_ISL_2343028 | 17/04/21 | North America / Mexico / Guanajuato  | Human | Male   | 30 | Released     | Oropharyngeal swab |
| hCoV-19/Mexico/CMX-INER-IBT-0178/2021       | EPI_ISL_2346436 | 14/04/21 | North America / Mexico / Mexico City | Human | Male   | 55 | Hospitalized |                    |
| hCoV-19/Mexico/CMX-INER-IBT-0179/2021       | EPI_ISL_2346437 | 14/04/21 | North America / Mexico / Mexico City | Human | Female | 81 | Hospitalized |                    |
| hCoV-19/Mexico/CMX-INER-IBT-0180/2021       | EPI_ISL_2346438 | 14/04/21 | North America / Mexico / Mexico City | Human | Female | 46 | Hospitalized |                    |
| hCoV-19/Mexico/CMX-INER-IBT-0181/2021       | EPI_ISL_2346439 | 14/04/21 | North America / Mexico / Mexico City | Human | Male   | 43 | Hospitalized |                    |
| hCoV-19/Mexico/CMX-INER-IBT-0182/2021       | EPI_ISL_2346440 | 14/04/21 | North America / Mexico / Mexico City | Human | Male   | 56 | Hospitalized |                    |
| hCoV-19/Mexico/CMX-INER-IBT-0183/2021       | EPI_ISL_2346441 | 15/04/21 | North America / Mexico / Mexico City | Human | Male   | 52 | Hospitalized |                    |
| hCoV-19/Mexico/CMX-INER-IBT-0184/2021       | EPI_ISL_2346442 | 10/04/21 | North America / Mexico / Mexico City | Human | Male   | 47 | Hospitalized |                    |
| hCoV-19/Mexico/CMX-INER-IBT-0185/2021       | EPI_ISL_2346443 | 17/04/21 | North America / Mexico / Mexico City | Human | Male   | 45 | Hospitalized |                    |
| hCoV-19/Mexico/CMX-INER-IBT-0186/2021       | EPI_ISL_2346444 | 17/04/21 | North America / Mexico / Mexico City | Human | Male   | 41 | Hospitalized |                    |
| hCoV-19/Mexico/CMX-INER-IBT-0187/2021       | EPI_ISL_2346445 | 18/04/21 | North America / Mexico / Mexico City | Human | Male   | 47 | Hospitalized |                    |
| hCoV-19/Mexico/CMX-INER-IBT-0188/2021       | EPI_ISL_2346446 | 18/04/21 | North America / Mexico / Mexico City | Human | Male   | 34 | Hospitalized |                    |
| hCoV-19/Mexico/CMX-INER-IBT-0190/2021       | EPI_ISL_2346448 | 18/04/21 | North America / Mexico / Mexico City | Human | Female | 44 | Hospitalized |                    |
| hCoV-19/Mexico/CMX-INER-IBT-0193/2021       | EPI_ISL_2346451 | 18/04/21 | North America / Mexico / Mexico City | Human | Female | 76 | Hospitalized |                    |
| hCoV-19/Mexico/CMX-INER-IBT-0194/2021       | EPI_ISL_2346452 | 19/04/21 | North America / Mexico / Mexico City | Human | Male   | 58 | Hospitalized |                    |
| hCoV-19/Mexico/CMX-INER-IBT-0195/2021       | EPI_ISL_2346453 | 19/04/21 | North America / Mexico / Mexico City | Human | Male   | 49 | Hospitalized |                    |
| hCoV-19/Mexico/CMX-INER-IBT-0196/2021       | EPI_ISL_2346454 | 19/04/21 | North America / Mexico / Mexico City | Human | Male   | 46 | Hospitalized |                    |
| hCoV-19/Mexico/CMX-INER-IBT-0199/2021       | EPI_ISL_2346456 | 22/04/21 | North America / Mexico / Mexico City | Human | Female | 58 | Hospitalized |                    |
| hCoV-19/Mexico/CMX-INER-IBT-0200/2021       | EPI_ISL_2346457 | 22/04/21 | North America / Mexico / Mexico City | Human | Female | 35 | Hospitalized |                    |







|                                             |                 |          |                                          |       |        |    |              |                                         |
|---------------------------------------------|-----------------|----------|------------------------------------------|-------|--------|----|--------------|-----------------------------------------|
| hCoV-19/Mexico/CMX-INMEGEN-05-04-308/2021   | EPI_ISL_2350096 | 10/04/21 | North America / Mexico / Mexico City     | Human | Female | 43 | unknown      | Oropharyngeal swab                      |
| hCoV-19/Mexico/CMX-INMEGEN-05-04-309/2021   | EPI_ISL_2350097 | 19/04/21 | North America / Mexico / Mexico City     | Human | Male   | 46 | unknown      | Oropharyngeal swab                      |
| hCoV-19/Mexico/CMX-INMEGEN-05-04-315/2021   | EPI_ISL_2350100 | 13/05/21 | North America / Mexico / Mexico City     | Human | Female | 26 | unknown      | Oropharyngeal swab                      |
| hCoV-19/Mexico/CMX-INMEGEN-05-04-316/2021   | EPI_ISL_2350101 | 13/05/21 | North America / Mexico / Mexico City     | Human | Female | 10 | unknown      | Oropharyngeal swab                      |
| hCoV-19/Mexico/CMX-INMEGEN-05-04-318/2021   | EPI_ISL_2350102 | 13/05/21 | North America / Mexico / Mexico City     | Human | Male   | 68 | unknown      | Oropharyngeal swab                      |
| hCoV-19/Mexico/CMX-INMEGEN-05-04-319/2021   | EPI_ISL_2350103 | 13/05/21 | North America / Mexico / Mexico City     | Human | Male   | 34 | unknown      | Oropharyngeal swab                      |
| hCoV-19/Mexico/CMX-INMEGEN-05-04-320/2021   | EPI_ISL_2350104 | 14/05/21 | North America / Mexico / Mexico City     | Human | Male   | 28 | unknown      | Oropharyngeal swab                      |
| hCoV-19/Mexico/CMX-INMEGEN-05-04-326/2021   | EPI_ISL_2350108 | 17/05/21 | North America / Mexico / Mexico City     | Human | Female | 41 | unknown      | Oropharyngeal swab                      |
| hCoV-19/Mexico/CMX-INMEGEN-05-04-327/2021   | EPI_ISL_2350109 | 17/05/21 | North America / Mexico / Mexico City     | Human | Female | 49 | unknown      | Oropharyngeal swab                      |
| hCoV-19/Mexico/CMX-INMEGEN-05-04-328/2021   | EPI_ISL_2350110 | 17/05/21 | North America / Mexico / Mexico City     | Human | Female | 53 | unknown      | Oropharyngeal swab                      |
| hCoV-19/Mexico/CMX-INMEGEN-05-04-331/2021   | EPI_ISL_2350112 | 17/05/21 | North America / Mexico / Mexico City     | Human | Male   | 37 | unknown      | Oropharyngeal swab                      |
| hCoV-19/Mexico/MEX-INMEGEN-05-04-336/2021   | EPI_ISL_2350114 | 17/05/21 | North America / Mexico / State of Mexico | Human | Male   | 52 | unknown      | Oropharyngeal swab                      |
| hCoV-19/Mexico/MEX-INMEGEN-05-04-339/2021   | EPI_ISL_2350116 | 17/05/21 | North America / Mexico / State of Mexico | Human | Male   | 27 | unknown      | Oropharyngeal swab                      |
| hCoV-19/Mexico/MEX-INMEGEN-05-04-340/2021   | EPI_ISL_2350117 | 17/05/21 | North America / Mexico / State of Mexico | Human | Male   | 31 | unknown      | Oropharyngeal swab                      |
| hCoV-19/Mexico/MEX-INMEGEN-05-04-345/2021   | EPI_ISL_2350119 | 17/05/21 | North America / Mexico / State of Mexico | Human | Male   | 39 | unknown      | Oropharyngeal swab                      |
| hCoV-19/Mexico/CMX-INMEGEN-05-04-346/2021   | EPI_ISL_2350120 | 17/05/21 | North America / Mexico / Mexico City     | Human | Male   | 21 | unknown      | Oropharyngeal swab                      |
| hCoV-19/Mexico/CMX-INMEGEN-05-04-347/2021   | EPI_ISL_2350121 | 17/05/21 | North America / Mexico / Mexico City     | Human | Female | 57 | unknown      | Oropharyngeal swab                      |
| hCoV-19/Mexico/MEX-INMEGEN-05-04-354/2021   | EPI_ISL_2350122 | 17/05/21 | North America / Mexico / State of Mexico | Human | Female | 26 | unknown      | Oropharyngeal swab                      |
| hCoV-19/Mexico/MEX-INMEGEN-05-04-358/2021   | EPI_ISL_2350125 | 17/05/21 | North America / Mexico / State of Mexico | Human | Male   | 55 | unknown      | Oropharyngeal swab                      |
| hCoV-19/Mexico/MEX-INMEGEN-05-04-359/2021   | EPI_ISL_2350126 | 17/05/21 | North America / Mexico / State of Mexico | Human | Female | 31 | unknown      | Oropharyngeal swab                      |
| hCoV-19/Mexico/MEX-INMEGEN-05-04-360/2021   | EPI_ISL_2350127 | 17/05/21 | North America / Mexico / State of Mexico | Human | Male   | 42 | unknown      | Oropharyngeal swab                      |
| hCoV-19/Mexico/MEX-INMEGEN-05-04-361/2021   | EPI_ISL_2350128 | 17/05/21 | North America / Mexico / State of Mexico | Human | Male   | 26 | unknown      | Oropharyngeal swab                      |
| hCoV-19/Mexico/MEX-INMEGEN-05-04-362/2021   | EPI_ISL_2350129 | 17/05/21 | North America / Mexico / State of Mexico | Human | Female | 53 | unknown      | Oropharyngeal swab                      |
| hCoV-19/Mexico/CMX-INMEGEN-05-04-363/2021   | EPI_ISL_2350130 | 17/05/21 | North America / Mexico / Mexico City     | Human | Female | 45 | unknown      | Oropharyngeal swab                      |
| hCoV-19/Mexico/CMX-INMEGEN-05-04-368/2021   | EPI_ISL_2350134 | 17/05/21 | North America / Mexico / Mexico City     | Human | Female | 68 | unknown      | Oropharyngeal swab                      |
| hCoV-19/Mexico/CMX-INMEGEN-05-04-371/2021   | EPI_ISL_2350136 | 17/05/21 | North America / Mexico / Mexico City     | Human | Female | 30 | unknown      | Oropharyngeal swab                      |
| hCoV-19/Mexico/CMX-INMEGEN-05-04-372/2021   | EPI_ISL_2350137 | 07/05/21 | North America / Mexico / Mexico City     | Human | Male   | 30 | unknown      | Oropharyngeal swab                      |
| hCoV-19/Mexico/MEX-INMEGEN-05-04-374/2021   | EPI_ISL_2350139 | 05/05/21 | North America / Mexico / State of Mexico | Human | Female | 48 | unknown      | Oropharyngeal swab                      |
| hCoV-19/Mexico/MEX-INMEGEN-05-04-375/2021   | EPI_ISL_2350140 | 05/05/21 | North America / Mexico / State of Mexico | Human | Female | 29 | unknown      | Oropharyngeal swab                      |
| hCoV-19/Mexico/CMX-INER-IBT-0198/2021       | EPI_ISL_2361879 | 19/04/21 | North America / Mexico / Mexico City     | Human | Male   | 36 | Hospitalized |                                         |
| hCoV-19/Mexico/YUC-INdRE_FB15098_S2173/2021 | EPI_ISL_2362687 | 14/03/21 | North America / Mexico / Yucatan         | Human | Male   | 70 | Deceased     | Oro-pharyngeal swab                     |
| hCoV-19/Mexico/GUA-INdRE_FB13902_S2212/2021 | EPI_ISL_2362688 | 20/04/21 | North America / Mexico / Guanajuato      | Human | Female | 29 | Released     | Oro-pharyngeal swab                     |
| hCoV-19/Mexico/GUA-INdRE_FB13874_S2218/2021 | EPI_ISL_2362689 | 20/04/21 | North America / Mexico / Guanajuato      | Human | Male   | 20 | Hospitalized | Oro-pharyngeal swab                     |
| hCoV-19/Mexico/GUA-INdRE_FB13926_S2260/2021 | EPI_ISL_2362690 | 22/04/21 | North America / Mexico / Guanajuato      | Human | Female | 52 | Released     | Oro-pharyngeal swab                     |
| hCoV-19/Mexico/GUA-INdRE_FB13922_S2263/2021 | EPI_ISL_2362691 | 22/04/21 | North America / Mexico / Guanajuato      | Human | Male   | 39 | Released     | Oro-pharyngeal swab                     |
| hCoV-19/Mexico/CHH_IBT_IMSS_1375/2021       | EPI_ISL_2391507 | 04/04/21 | North America / Mexico / Chihuahua       | Human | Male   | 32 | Ambulatory   | Nasopharyngeal swab and pharyngeal swab |
| hCoV-19/Mexico/CMX_IBT_IMSS_1284/2021       | EPI_ISL_2391509 | 27/04/21 | North America / Mexico / Mexico City     | Human | Female | 33 | Ambulatory   | Nasopharyngeal swab and pharyngeal swab |
| hCoV-19/Mexico/PUE_IBT_IMSS_1210/2021       | EPI_ISL_2391510 | 29/04/21 | North America / Mexico / Puebla          | Human | Male   | 35 | Ambulatory   | Pharyngeal swab                         |
| hCoV-19/Mexico/CMX_IBT_IMSS_1304/2021       | EPI_ISL_2391511 | 28/04/21 | North America / Mexico / Mexico City     | Human | Male   | 71 | Hospitalized | Nasopharyngeal swab and pharyngeal swab |
| hCoV-19/Mexico/ROO_IBT_IMSS_1352/2021       | EPI_ISL_2391512 | 13/04/21 | North America / Mexico / Quintana Roo    | Human | Female | 64 | Hospitalized | Nasopharyngeal swab and pharyngeal swab |
| hCoV-19/Mexico/CMX_IBT_IMSS_1255/2021       | EPI_ISL_2391513 | 26/04/21 | North America / Mexico / Mexico City     | Human | Male   | 51 | Ambulatory   | Nasopharyngeal swab and pharyngeal swab |
| hCoV-19/Mexico/CMX_IBT_IMSS_1321/2021       | EPI_ISL_2391514 | 29/04/21 | North America / Mexico / Mexico City     | Human | Female | 60 | Hospitalized | Nasopharyngeal swab                     |
| hCoV-19/Mexico/CMX_IBT_IMSS_1157/2021       | EPI_ISL_2391515 | 01/05/21 | North America / Mexico / Mexico City     | Human | Female | 27 | Hospitalized | Pharyngeal swab                         |
| hCoV-19/Mexico/VER_IBT_IMSS_1213/2021       | EPI_ISL_2391516 | 01/05/21 | North America / Mexico / Veracruz        | Human | Male   | 29 | Ambulatory   | Nasopharyngeal swab and pharyngeal swab |

|                                       |                 |          |                                          |       |        |    |              |                                         |
|---------------------------------------|-----------------|----------|------------------------------------------|-------|--------|----|--------------|-----------------------------------------|
| hCoV-19/Mexico/MEX_IBT_IMSS_1217/2021 | EPI_ISL_2391517 | 05/05/21 | North America / Mexico / State of Mexico | Human | Male   | 43 | Ambulatory   | Nasopharyngeal swab and pharyngeal swab |
| hCoV-19/Mexico/CMX_IBT_IMSS_1385/2021 | EPI_ISL_2391518 | 14/04/21 | North America / Mexico / Mexico City     | Human | Male   | 59 | Hospitalized | Nasopharyngeal swab                     |
| hCoV-19/Mexico/MEX_IBT_IMSS_1164/2021 | EPI_ISL_2391519 | 03/05/21 | North America / Mexico / State of Mexico | Human | Female | 43 | Ambulatory   | Nasopharyngeal swab and pharyngeal swab |
| hCoV-19/Mexico/PUE_IBT_IMSS_1166/2021 | EPI_ISL_2391521 | 01/05/21 | North America / Mexico / Puebla          | Human | Male   | 48 | Ambulatory   | Nasopharyngeal swab and pharyngeal swab |
| hCoV-19/Mexico/PUE_IBT_IMSS_1174/2021 | EPI_ISL_2391522 | 01/05/21 | North America / Mexico / Puebla          | Human | Male   | 28 | Hospitalized | Nasopharyngeal swab and pharyngeal swab |
| hCoV-19/Mexico/CHH_IBT_IMSS_1374/2021 | EPI_ISL_2391523 | 04/04/21 | North America / Mexico / Chihuahua       | Human | Female | 74 | Hospitalized | Pharyngeal swab                         |
| hCoV-19/Mexico/CMX_IBT_IMSS_1323/2021 | EPI_ISL_2391524 | 28/04/21 | North America / Mexico / Mexico City     | Human | Male   | 41 | Ambulatory   | Nasopharyngeal swab and pharyngeal swab |
| hCoV-19/Mexico/CMX_IBT_IMSS_1136/2021 | EPI_ISL_2391525 | 30/04/21 | North America / Mexico / Mexico City     | Human | Male   | 62 | Hospitalized | Pharyngeal swab                         |
| hCoV-19/Mexico/CMX_IBT_IMSS_1303/2021 | EPI_ISL_2391527 | 29/04/21 | North America / Mexico / Mexico City     | Human | Male   | 40 | Ambulatory   | Nasopharyngeal swab and pharyngeal swab |
| hCoV-19/Mexico/VER_IBT_IMSS_1295/2021 | EPI_ISL_2391528 | 26/04/21 | North America / Mexico / Veracruz        | Human | Male   | 35 | Ambulatory   | Nasopharyngeal swab and pharyngeal swab |
| hCoV-19/Mexico/VER_IBT_IMSS_1298/2021 | EPI_ISL_2391529 | 22/04/21 | North America / Mexico / Veracruz        | Human | Female | 36 | Ambulatory   | Nasopharyngeal swab and pharyngeal swab |
| hCoV-19/Mexico/MEX_IBT_IMSS_1228/2021 | EPI_ISL_2391530 | 03/05/21 | North America / Mexico / State of Mexico | Human | Female | 53 | Ambulatory   | Nasopharyngeal swab and pharyngeal swab |
| hCoV-19/Mexico/PUE_IBT_IMSS_1310/2021 | EPI_ISL_2391532 | 28/04/21 | North America / Mexico / Puebla          | Human | Female | 27 | Ambulatory   | Nasopharyngeal swab and pharyngeal swab |
| hCoV-19/Mexico/CHH_IBT_IMSS_1366/2021 | EPI_ISL_2391533 | 05/03/21 | North America / Mexico / Chihuahua       | Human | Male   | 79 | Hospitalized | Nasopharyngeal swab and pharyngeal swab |
| hCoV-19/Mexico/CMX_IBT_IMSS_1297/2021 | EPI_ISL_2391534 | 28/04/21 | North America / Mexico / Mexico City     | Human | Male   | 25 | Ambulatory   | Nasopharyngeal swab and pharyngeal swab |
| hCoV-19/Mexico/PUE_IBT_IMSS_1305/2021 | EPI_ISL_2391535 | 28/04/21 | North America / Mexico / Puebla          | Human | Male   | 24 | Ambulatory   | Nasopharyngeal swab and pharyngeal swab |
| hCoV-19/Mexico/ROO_IBT_IMSS_1345/2021 | EPI_ISL_2391537 | 29/03/21 | North America / Mexico / Quintana Roo    | Human | Male   | 43 | Hospitalized | Nasopharyngeal swab and pharyngeal swab |
| hCoV-19/Mexico/MEX_IBT_IMSS_1320/2021 | EPI_ISL_2391538 | 23/04/21 | North America / Mexico / State of Mexico | Human | Male   | 54 | Ambulatory   | Nasopharyngeal swab and pharyngeal swab |
| hCoV-19/Mexico/MEX_IBT_IMSS_1315/2021 | EPI_ISL_2391539 | 26/04/21 | North America / Mexico / State of Mexico | Human | Male   | 40 | Hospitalized | Nasopharyngeal swab and pharyngeal swab |
| hCoV-19/Mexico/CMX_IBT_IMSS_1211/2021 | EPI_ISL_2391541 | 05/05/21 | North America / Mexico / Mexico City     | Human | Male   | 79 | Hospitalized | Pharyngeal swab                         |
| hCoV-19/Mexico/CMX_IBT_IMSS_1289/2021 | EPI_ISL_2391542 | 28/04/21 | North America / Mexico / Mexico City     | Human | Female | 36 | Ambulatory   | Pharyngeal swab                         |
| hCoV-19/Mexico/VER_IBT_IMSS_1179/2021 | EPI_ISL_2391543 | 02/05/21 | North America / Mexico / Veracruz        | Human | Male   | 54 | Ambulatory   | Nasopharyngeal swab                     |
| hCoV-19/Mexico/PUE_IBT_IMSS_1206/2021 | EPI_ISL_2391545 | 02/05/21 | North America / Mexico / Puebla          | Human | Male   | 38 | Hospitalized | Nasopharyngeal swab and pharyngeal swab |
| hCoV-19/Mexico/VER_IBT_IMSS_1199/2021 | EPI_ISL_2391546 | 22/04/21 | North America / Mexico / Veracruz        | Human | Female | 37 | Ambulatory   | Nasopharyngeal swab and pharyngeal swab |
| hCoV-19/Mexico/CMX_IBT_IMSS_1285/2021 | EPI_ISL_2391547 | 26/04/21 | North America / Mexico / Mexico City     | Human | Male   | 44 | Ambulatory   | Nasopharyngeal swab and pharyngeal swab |
| hCoV-19/Mexico/MEX_IBT_IMSS_1292/2021 | EPI_ISL_2391548 | 27/04/21 | North America / Mexico / State of Mexico | Human | Female | 43 | Hospitalized | Nasopharyngeal swab and pharyngeal swab |
| hCoV-19/Mexico/MEX_IBT_IMSS_1138/2021 | EPI_ISL_2391550 | 23/04/21 | North America / Mexico / State of Mexico | Human | Female | 23 | Ambulatory   | Nasopharyngeal swab and pharyngeal swab |
| hCoV-19/Mexico/CMX_IBT_IMSS_1386/2021 | EPI_ISL_2391552 | 16/04/21 | North America / Mexico / Mexico City     | Human | Male   | 19 | Ambulatory   | Nasopharyngeal swab and pharyngeal swab |
| hCoV-19/Mexico/CMX_IBT_IMSS_1286/2021 | EPI_ISL_2391553 | 28/04/21 | North America / Mexico / Mexico City     | Human | Male   | 30 | Hospitalized | Nasopharyngeal swab and pharyngeal swab |
| hCoV-19/Mexico/PUE_IBT_IMSS_1232/2021 | EPI_ISL_2391556 | 04/05/21 | North America / Mexico / Puebla          | Human | Female | 47 | Ambulatory   | Nasopharyngeal swab and pharyngeal swab |
| hCoV-19/Mexico/MEX_IBT_IMSS_1196/2021 | EPI_ISL_2391558 | 01/05/21 | North America / Mexico / State of Mexico | Human | Female | 29 | Ambulatory   | Pharyngeal swab                         |
| hCoV-19/Mexico/MEX_IBT_IMSS_1221/2021 | EPI_ISL_2391559 | 04/05/21 | North America / Mexico / State of Mexico | Human | Male   | 45 | Ambulatory   | Nasopharyngeal swab and pharyngeal swab |
| hCoV-19/Mexico/CMX_IBT_IMSS_1225/2021 | EPI_ISL_2391560 | 04/05/21 | North America / Mexico / Mexico City     | Human | Male   | 62 | Ambulatory   | Pharyngeal swab                         |
| hCoV-19/Mexico/CMX_IBT_IMSS_1148/2021 | EPI_ISL_2391561 | 30/04/21 | North America / Mexico / Mexico City     | Human | Female | 53 | Ambulatory   | Nasopharyngeal swab and pharyngeal swab |
| hCoV-19/Mexico/PUE_IBT_IMSS_1176/2021 | EPI_ISL_2391562 | 29/04/21 | North America / Mexico / Puebla          | Human | Male   | 44 | Ambulatory   | Nasopharyngeal swab and pharyngeal swab |
| hCoV-19/Mexico/PUE_IBT_IMSS_1207/2021 | EPI_ISL_2391563 | 02/05/21 | North America / Mexico / Puebla          | Human | Male   | 59 | Hospitalized | Nasopharyngeal swab and pharyngeal swab |
| hCoV-19/Mexico/MEX_IBT_IMSS_1238/2021 | EPI_ISL_2391564 | 05/05/21 | North America / Mexico / State of Mexico | Human | Female | 54 | Hospitalized | Pharyngeal swab                         |
| hCoV-19/Mexico/NAY_IBT_IMSS_1358/2021 | EPI_ISL_2391565 | 12/04/21 | North America / Mexico / Nayarit         | Human | Male   | 51 | Ambulatory   | Nasopharyngeal swab and pharyngeal swab |
| hCoV-19/Mexico/CMX_IBT_IMSS_1324/2021 | EPI_ISL_2391566 | 28/04/21 | North America / Mexico / Mexico City     | Human | Male   | 11 | Ambulatory   | Nasopharyngeal swab and pharyngeal swab |
| hCoV-19/Mexico/PUE_IBT_IMSS_1233/2021 | EPI_ISL_2391567 | 02/05/21 | North America / Mexico / Puebla          | Human | Female | 31 | Ambulatory   | Pharyngeal swab                         |
| hCoV-19/Mexico/MIC_IBT_IMSS_1355/2021 | EPI_ISL_2391568 | 01/04/21 | North America / Mexico / Michoacan       | Human | Male   | 85 | Hospitalized | Nasopharyngeal swab and pharyngeal swab |
| hCoV-19/Mexico/PUE_IBT_IMSS_1235/2021 | EPI_ISL_2391569 | 29/04/21 | North America / Mexico / Puebla          | Human | Male   | 53 | Hospitalized | Nasopharyngeal swab and pharyngeal swab |
| hCoV-19/Mexico/MEX_IBT_IMSS_1329/2021 | EPI_ISL_2391571 | 22/04/21 | North America / Mexico / State of Mexico | Human | Female | 18 | Ambulatory   | Nasopharyngeal swab and pharyngeal swab |
| hCoV-19/Mexico/PUE_IBT_IMSS_1144/2021 | EPI_ISL_2391573 | 29/04/21 | North America / Mexico / Puebla          | Human | Male   | 85 | Hospitalized | Nasopharyngeal swab and pharyngeal swab |



|                                       |                 |          |                                              |       |        |    |              |                                         |
|---------------------------------------|-----------------|----------|----------------------------------------------|-------|--------|----|--------------|-----------------------------------------|
| hCoV-19/Mexico/MEX_IBT_IMSS_1198/2021 | EPI_ISL_2391574 | 29/04/21 | North America / Mexico / State of Mexico     | Human | Female | 42 | Ambulatory   | Nasopharyngeal swab and pharyngeal swab |
| hCoV-19/Mexico/CHH_IBT_IMSS_1365/2021 | EPI_ISL_2391575 | 10/03/21 | North America / Mexico / Chihuahua           | Human | Male   | 44 | Hospitalized | Nasopharyngeal swab and pharyngeal swab |
| hCoV-19/Mexico/MEX_IBT_IMSS_1231/2021 | EPI_ISL_2391576 | 24/04/21 | North America / Mexico / State of Mexico     | Human | Female | 53 | Hospitalized | Nasopharyngeal swab and pharyngeal swab |
| hCoV-19/Mexico/PUE_IBT_IMSS_1307/2021 | EPI_ISL_2391577 | 27/04/21 | North America / Mexico / Puebla              | Human | Female | 52 | Ambulatory   | Nasopharyngeal swab and pharyngeal swab |
| hCoV-19/Mexico/VER_IBT_IMSS_1250/2021 | EPI_ISL_2391579 | 05/05/21 | North America / Mexico / Veracruz            | Human | Female | 49 | Ambulatory   | Nasopharyngeal swab and pharyngeal swab |
| hCoV-19/Mexico/CMX_IBT_IMSS_1190/2021 | EPI_ISL_2391582 | 04/05/21 | North America / Mexico / Mexico City         | Human | Male   | 77 | Hospitalized | Pharyngeal swab                         |
| hCoV-19/Mexico/CMX_IBT_IMSS_1283/2021 | EPI_ISL_2391583 | 27/04/21 | North America / Mexico / Mexico City         | Human | Male   | 59 | Ambulatory   | Nasopharyngeal swab and pharyngeal swab |
| hCoV-19/Mexico/MEX_IBT_IMSS_1318/2021 | EPI_ISL_2391584 | 29/04/21 | North America / Mexico / State of Mexico     | Human | Female | 80 | Hospitalized | Nasopharyngeal swab and pharyngeal swab |
| hCoV-19/Mexico/PUE_IBT_IMSS_1340/2021 | EPI_ISL_2391585 | 22/04/21 | North America / Mexico / Puebla              | Human | Female | 56 | Hospitalized | Nasopharyngeal swab and pharyngeal swab |
| hCoV-19/Mexico/PUE_IBT_IMSS_1256/2021 | EPI_ISL_2391586 | 06/05/21 | North America / Mexico / Puebla              | Human | Male   | 36 | Ambulatory   | Nasopharyngeal swab                     |
| hCoV-19/Mexico/BCS_IBT_IMSS_1181/2021 | EPI_ISL_2391587 | 01/05/21 | North America / Mexico / Baja California Sur | Human | Female | 40 | Ambulatory   | Nasopharyngeal swab and pharyngeal swab |
| hCoV-19/Mexico/DUR_IBT_IMSS_1378/2021 | EPI_ISL_2391588 | 10/04/21 | North America / Mexico / Durango             | Human | Female | 63 | Hospitalized | Nasopharyngeal swab and pharyngeal swab |
| hCoV-19/Mexico/MEX_IBT_IMSS_1317/2021 | EPI_ISL_2391590 | 29/04/21 | North America / Mexico / State of Mexico     | Human | Male   | 48 | Hospitalized | Nasopharyngeal swab and pharyngeal swab |
| hCoV-19/Mexico/VER_IBT_IMSS_1159/2021 | EPI_ISL_2391592 | 22/04/21 | North America / Mexico / Veracruz            | Human | Female | 32 | Ambulatory   | Nasopharyngeal swab and pharyngeal swab |
| hCoV-19/Mexico/MEX_IBT_IMSS_1277/2021 | EPI_ISL_2391593 | 28/04/21 | North America / Mexico / State of Mexico     | Human | Female | 55 | Hospitalized | Nasopharyngeal swab                     |
| hCoV-19/Mexico/MEX_IBT_IMSS_1262/2021 | EPI_ISL_2391594 | 07/05/21 | North America / Mexico / State of Mexico     | Human | Female | 26 | Ambulatory   | Nasopharyngeal swab and pharyngeal swab |
| hCoV-19/Mexico/MEX_IBT_IMSS_1195/2021 | EPI_ISL_2391595 | 04/05/21 | North America / Mexico / State of Mexico     | Human | Female | 65 | Hospitalized | Nasopharyngeal swab and pharyngeal swab |
| hCoV-19/Mexico/CMX_IBT_IMSS_1334/2021 | EPI_ISL_2391596 | 30/04/21 | North America / Mexico / Mexico City         | Human | Female | 50 | Hospitalized | Nasopharyngeal swab and pharyngeal swab |
| hCoV-19/Mexico/COA_IBT_IMSS_1369/2021 | EPI_ISL_2391598 | 13/03/21 | North America / Mexico / Coahuila            | Human | Male   | 55 | Hospitalized | Nasopharyngeal swab and pharyngeal swab |
| hCoV-19/Mexico/COA_IBT_IMSS_1132/2021 | EPI_ISL_2391599 | 29/04/21 | North America / Mexico / Mexico City         | Human | Male   | 17 | Ambulatory   | Nasopharyngeal swab and pharyngeal swab |
| hCoV-19/Mexico/CMX_IBT_IMSS_1158/2021 | EPI_ISL_2391600 | 02/05/21 | North America / Mexico / Mexico City         | Human | Female | 32 | Hospitalized | Pharyngeal swab                         |
| hCoV-19/Mexico/CMX_IBT_IMSS_1282/2021 | EPI_ISL_2391601 | 27/04/21 | North America / Mexico / Mexico City         | Human | Female | 59 | Ambulatory   | Nasopharyngeal swab and pharyngeal swab |
| hCoV-19/Mexico/CMX_IBT_IMSS_1322/2021 | EPI_ISL_2391602 | 29/04/21 | North America / Mexico / Mexico City         | Human | Female | 45 | Ambulatory   | Nasopharyngeal swab and pharyngeal swab |
| hCoV-19/Mexico/CMX_IBT_IMSS_1247/2021 | EPI_ISL_2391603 | 26/04/21 | North America / Mexico / Mexico City         | Human | Male   | 51 | Ambulatory   | Nasopharyngeal swab and pharyngeal swab |
| hCoV-19/Mexico/MEX_IBT_IMSS_1275/2021 | EPI_ISL_2391604 | 26/04/21 | North America / Mexico / State of Mexico     | Human | Male   | 32 | Ambulatory   | Nasopharyngeal swab and pharyngeal swab |
| hCoV-19/Mexico/CMX_IBT_IMSS_1288/2021 | EPI_ISL_2391605 | 28/04/21 | North America / Mexico / Mexico City         | Human | Male   | 40 | Ambulatory   | Pharyngeal swab                         |
| hCoV-19/Mexico/TLA_IBT_IMSS_1163/2021 | EPI_ISL_2391606 | 30/04/21 | North America / Mexico / Tlaxcala            | Human | Male   | 58 | Hospitalized | Nasopharyngeal swab and pharyngeal swab |
| hCoV-19/Mexico/VER_IBT_IMSS_1336/2021 | EPI_ISL_2391607 | 29/04/21 | North America / Mexico / Veracruz            | Human | Male   | 37 | Hospitalized | Nasopharyngeal swab and pharyngeal swab |
| hCoV-19/Mexico/MEX_IBT_IMSS_1291/2021 | EPI_ISL_2391608 | 22/04/21 | North America / Mexico / State of Mexico     | Human | Female | 44 | Ambulatory   | Nasopharyngeal swab and pharyngeal swab |
| hCoV-19/Mexico/MOR_IBT_IMSS_1226/2021 | EPI_ISL_2391611 | 03/05/21 | North America / Mexico / Morelos             | Human | Male   | 74 | Hospitalized | Nasopharyngeal swab and pharyngeal swab |
| hCoV-19/Mexico/MEX_IBT_IMSS_1316/2021 | EPI_ISL_2391612 | 26/04/21 | North America / Mexico / State of Mexico     | Human | Male   | 52 | Hospitalized | Nasopharyngeal swab and pharyngeal swab |
| hCoV-19/Mexico/CMX_IBT_IMSS_1301/2021 | EPI_ISL_2391613 | 22/04/21 | North America / Mexico / Mexico City         | Human | Female | 52 | Hospitalized | Nasopharyngeal swab                     |
| hCoV-19/Mexico/MEX_IBT_IMSS_1276/2021 | EPI_ISL_2391615 | 28/04/21 | North America / Mexico / State of Mexico     | Human | Male   | 46 | Hospitalized | Nasopharyngeal swab                     |
| hCoV-19/Mexico/VER_IBT_IMSS_1328/2021 | EPI_ISL_2391616 | 28/04/21 | North America / Mexico / Veracruz            | Human | Male   | 56 | Ambulatory   | Nasopharyngeal swab and pharyngeal swab |
| hCoV-19/Mexico/TLA_IBT_IMSS_1230/2021 | EPI_ISL_2391618 | 04/05/21 | North America / Mexico / Tlaxcala            | Human | Male   | 37 | Hospitalized | Nasopharyngeal swab and pharyngeal swab |
| hCoV-19/Mexico/MEX_IBT_IMSS_1381/2021 | EPI_ISL_2391619 | 21/03/21 | North America / Mexico / State of Mexico     | Human | Male   | 40 | Hospitalized | Nasopharyngeal swab and pharyngeal swab |
| hCoV-19/Mexico/CMX_IBT_IMSS_1212/2021 | EPI_ISL_2391620 | 05/05/21 | North America / Mexico / Mexico City         | Human | Male   | 35 | Hospitalized | Pharyngeal swab                         |
| hCoV-19/Mexico/PUE_IBT_IMSS_1172/2021 | EPI_ISL_2391621 | 01/05/21 | North America / Mexico / Puebla              | Human | Male   | 68 | Hospitalized | Nasopharyngeal swab and pharyngeal swab |
| hCoV-19/Mexico/CMX_IBT_IMSS_1215/2021 | EPI_ISL_2391622 | 04/05/21 | North America / Mexico / Mexico City         | Human | Male   | 33 | Ambulatory   | Nasopharyngeal swab and pharyngeal swab |
| hCoV-19/Mexico/MEX_IBT_IMSS_1264/2021 | EPI_ISL_2391623 | 09/05/21 | North America / Mexico / State of Mexico     | Human | Female | 34 | Ambulatory   | Nasopharyngeal swab and pharyngeal swab |
| hCoV-19/Mexico/CMX_IBT_IMSS_1189/2021 | EPI_ISL_2391624 | 24/04/21 | North America / Mexico / Mexico City         | Human | Male   | 76 | Hospitalized | Nasopharyngeal swab                     |
| hCoV-19/Mexico/MEX_IBT_IMSS_1273/2021 | EPI_ISL_2391626 | 26/04/21 | North America / Mexico / State of Mexico     | Human | Female | 70 | Hospitalized | Nasopharyngeal swab and pharyngeal swab |
| hCoV-19/Mexico/VER_IBT_IMSS_1266/2021 | EPI_ISL_2391627 | 23/04/21 | North America / Mexico / Veracruz            | Human | Male   | 30 | Ambulatory   | Nasopharyngeal swab and pharyngeal swab |
| hCoV-19/Mexico/QUE_IBT_IMSS_1149/2021 | EPI_ISL_2391629 | 03/05/21 | North America / Mexico / Queretaro           | Human | Female | 95 | Hospitalized | Nasopharyngeal swab and pharyngeal swab |

|                                       |                 |          |                                          |       |        |    |              |                                         |
|---------------------------------------|-----------------|----------|------------------------------------------|-------|--------|----|--------------|-----------------------------------------|
| hCoV-19/Mexico/MOR_IBT_IMSS_1243/2021 | EPI_ISL_2391630 | 03/05/21 | North America / Mexico / Morelos         | Human | Male   | 69 | Hospitalized | Nasopharyngeal swab and pharyngeal swab |
| hCoV-19/Mexico/PUE_IBT_IMSS_1173/2021 | EPI_ISL_2391631 | 30/04/21 | North America / Mexico / Puebla          | Human | Male   | 42 | Hospitalized | Nasopharyngeal swab and pharyngeal swab |
| hCoV-19/Mexico/MEX_IBT_IMSS_1278/2021 | EPI_ISL_2391633 | 28/04/21 | North America / Mexico / State of Mexico | Human | Male   | 61 | Hospitalized | Nasopharyngeal swab                     |
| hCoV-19/Mexico/CMX_IBT_IMSS_1188/2021 | EPI_ISL_2391634 | 04/05/21 | North America / Mexico / Mexico City     | Human | Male   | 49 | Hospitalized | Pharyngeal swab                         |
| hCoV-19/Mexico/MEX_IBT_IMSS_1218/2021 | EPI_ISL_2391635 | 04/05/21 | North America / Mexico / State of Mexico | Human | Male   | 57 | Hospitalized | Nasopharyngeal swab and pharyngeal swab |
| hCoV-19/Mexico/PUE_IBT_IMSS_1202/2021 | EPI_ISL_2391636 | 01/05/21 | North America / Mexico / Puebla          | Human | Male   | 72 | Ambulatory   | Nasopharyngeal swab and pharyngeal swab |
| hCoV-19/Mexico/MEX_IBT_IMSS_1147/2021 | EPI_ISL_2391637 | 03/05/21 | North America / Mexico / State of Mexico | Human | Male   | 81 | Hospitalized | Nasopharyngeal swab and pharyngeal swab |
| hCoV-19/Mexico/CMX_IBT_IMSS_1187/2021 | EPI_ISL_2391638 | 04/05/21 | North America / Mexico / Mexico City     | Human | Male   | 47 | Hospitalized | Pharyngeal swab                         |
| hCoV-19/Mexico/PUE_IBT_IMSS_1201/2021 | EPI_ISL_2391640 | 03/05/21 | North America / Mexico / Puebla          | Human | Male   | 44 | Ambulatory   | Nasopharyngeal swab and pharyngeal swab |
| hCoV-19/Mexico/CMX_IBT_IMSS_1145/2021 | EPI_ISL_2391641 | 01/05/21 | North America / Mexico / Mexico City     | Human | Female | 44 | Hospitalized | Nasopharyngeal swab                     |
| hCoV-19/Mexico/PUE_IBT_IMSS_1175/2021 | EPI_ISL_2391642 | 29/04/21 | North America / Mexico / Puebla          | Human | Male   | 68 | Ambulatory   | Nasopharyngeal swab and pharyngeal swab |
| hCoV-19/Mexico/CMX_IBT_IMSS_1265/2021 | EPI_ISL_2391643 | 09/05/21 | North America / Mexico / Mexico City     | Human | Male   | 54 | Hospitalized | Nasopharyngeal swab and pharyngeal swab |
| hCoV-19/Mexico/PUE_IBT_IMSS_1171/2021 | EPI_ISL_2391644 | 01/05/21 | North America / Mexico / Puebla          | Human | Male   | 36 | Hospitalized | Nasopharyngeal swab and pharyngeal swab |
| hCoV-19/Mexico/VER_IBT_IMSS_1246/2021 | EPI_ISL_2391646 | 04/05/21 | North America / Mexico / Veracruz        | Human | Female | 45 | Hospitalized | Nasopharyngeal swab and pharyngeal swab |
| hCoV-19/Mexico/CMX_IBT_IMSS_1384/2021 | EPI_ISL_2391648 | 11/04/21 | North America / Mexico / Mexico City     | Human | Male   | 52 | Hospitalized | Bronchoalveolar lavage                  |
| hCoV-19/Mexico/PUE_IBT_IMSS_1309/2021 | EPI_ISL_2391649 | 27/04/21 | North America / Mexico / Puebla          | Human | Male   | 34 | Ambulatory   | Nasopharyngeal swab and pharyngeal swab |
| hCoV-19/Mexico/PUE_IBT_IMSS_1236/2021 | EPI_ISL_2391652 | 03/05/21 | North America / Mexico / Puebla          | Human | Female | 74 | Ambulatory   | Nasopharyngeal swab and pharyngeal swab |
| hCoV-19/Mexico/CMX_IBT_IMSS_1186/2021 | EPI_ISL_2391653 | 03/05/21 | North America / Mexico / Mexico City     | Human | Female | 49 | Ambulatory   | Nasopharyngeal swab and pharyngeal swab |
| hCoV-19/Mexico/QUE_IBT_IMSS_1191/2021 | EPI_ISL_2391654 | 03/05/21 | North America / Mexico / Queretaro       | Human | Female | 21 | Hospitalized | Nasopharyngeal swab and pharyngeal swab |
| hCoV-19/Mexico/CHH_IBT_IMSS_1361/2021 | EPI_ISL_2391655 | 28/02/21 | North America / Mexico / Chihuahua       | Human | Male   | 77 | Hospitalized | Nasopharyngeal swab and pharyngeal swab |
| hCoV-19/Mexico/MEX_IBT_IMSS_1267/2021 | EPI_ISL_2391656 | 26/04/21 | North America / Mexico / State of Mexico | Human | Female | 44 | Hospitalized | Pharyngeal swab                         |
| hCoV-19/Mexico/MEX_IBT_IMSS_1383/2021 | EPI_ISL_2391657 | 22/03/21 | North America / Mexico / State of Mexico | Human | Female | 84 | Hospitalized | Pharyngeal swab                         |
| hCoV-19/Mexico/CMX_IBT_IMSS_1259/2021 | EPI_ISL_2391658 | 09/05/21 | North America / Mexico / Mexico City     | Human | Male   | 74 | Hospitalized | Pharyngeal swab                         |
| hCoV-19/Mexico/MEX_IBT_IMSS_1248/2021 | EPI_ISL_2391659 | 05/05/21 | North America / Mexico / State of Mexico | Human | Male   | 58 | Ambulatory   | Nasopharyngeal swab and pharyngeal swab |
| hCoV-19/Mexico/MIC_IBT_IMSS_1353/2021 | EPI_ISL_2391661 | 13/03/21 | North America / Mexico / Michoacan       | Human | Male   | 80 | Hospitalized | Nasopharyngeal swab and pharyngeal swab |
| hCoV-19/Mexico/OAX_IBT_IMSS_1244/2021 | EPI_ISL_2391662 | 03/05/21 | North America / Mexico / Oaxaca          | Human | Male   | 43 | Hospitalized | Nasopharyngeal swab and pharyngeal swab |
| hCoV-19/Mexico/HID_IBT_IMSS_1380/2021 | EPI_ISL_2391663 | 19/03/21 | North America / Mexico / Hidalgo         | Human | Male   | 57 | Hospitalized | Pharyngeal swab                         |
| hCoV-19/Mexico/CMX_IBT_IMSS_1268/2021 | EPI_ISL_2391664 | 27/04/21 | North America / Mexico / Mexico City     | Human | Male   | 47 | Hospitalized | Nasopharyngeal swab and pharyngeal swab |
| hCoV-19/Mexico/CMX_IBT_IMSS_1311/2021 | EPI_ISL_2391665 | 22/04/21 | North America / Mexico / Mexico City     | Human | Female | 67 | Hospitalized | Nasopharyngeal swab                     |
| hCoV-19/Mexico/MEX_IBT_IMSS_1219/2021 | EPI_ISL_2391667 | 24/04/21 | North America / Mexico / State of Mexico | Human | Male   | 36 | Hospitalized | Nasopharyngeal swab and pharyngeal swab |
| hCoV-19/Mexico/MEX_IBT_IMSS_1325/2021 | EPI_ISL_2391669 | 28/04/21 | North America / Mexico / State of Mexico | Human | Female | 52 | Ambulatory   | Nasopharyngeal swab and pharyngeal swab |
| hCoV-19/Mexico/PUE_IBT_IMSS_1169/2021 | EPI_ISL_2391670 | 01/05/21 | North America / Mexico / Puebla          | Human | Male   | 62 | Hospitalized | Nasopharyngeal swab and pharyngeal swab |
| hCoV-19/Mexico/PUE_IBT_IMSS_1167/2021 | EPI_ISL_2391671 | 29/04/21 | North America / Mexico / Puebla          | Human | Female | 49 | Ambulatory   | Nasopharyngeal swab and pharyngeal swab |
| hCoV-19/Mexico/VER_IBT_IMSS_1300/2021 | EPI_ISL_2391672 | 27/04/21 | North America / Mexico / Veracruz        | Human | Female | 32 | Hospitalized | Nasopharyngeal swab and pharyngeal swab |
| hCoV-19/Mexico/PUE_IBT_IMSS_1308/2021 | EPI_ISL_2391673 | 28/04/21 | North America / Mexico / Puebla          | Human | Female | 46 | Ambulatory   | Nasopharyngeal swab and pharyngeal swab |
| hCoV-19/Mexico/CMX_IBT_IMSS_1131/2021 | EPI_ISL_2391675 | 30/04/21 | North America / Mexico / Mexico City     | Human | Male   | 20 | Hospitalized | Pharyngeal swab                         |
| hCoV-19/Mexico/VER_IBT_IMSS_1245/2021 | EPI_ISL_2391676 | 04/05/21 | North America / Mexico / Veracruz        | Human | Male   | 38 | Ambulatory   | Nasopharyngeal swab and pharyngeal swab |
| hCoV-19/Mexico/CMX_IBT_IMSS_1224/2021 | EPI_ISL_2391677 | 04/05/21 | North America / Mexico / Mexico City     | Human | Male   | 42 | Hospitalized | Pharyngeal swab                         |
| hCoV-19/Mexico/PUE_IBT_IMSS_1251/2021 | EPI_ISL_2391678 | 06/05/21 | North America / Mexico / Puebla          | Human | Female | 49 | Hospitalized | Nasopharyngeal swab and pharyngeal swab |
| hCoV-19/Mexico/MEX_IBT_IMSS_1339/2021 | EPI_ISL_2391680 | 29/04/21 | North America / Mexico / State of Mexico | Human | Female | 23 | Ambulatory   | Pharyngeal swab                         |
| hCoV-19/Mexico/CMX_IBT_IMSS_1183/2021 | EPI_ISL_2391682 | 03/05/21 | North America / Mexico / Mexico City     | Human | Female | 59 | Ambulatory   | Pharyngeal swab                         |
| hCoV-19/Mexico/CMX_IBT_IMSS_1269/2021 | EPI_ISL_2391683 | 27/04/21 | North America / Mexico / Mexico City     | Human | Male   | 67 | Hospitalized | Nasopharyngeal swab and pharyngeal swab |
| hCoV-19/Mexico/CMX_IBT_IMSS_1130/2021 | EPI_ISL_2391684 | 29/04/21 | North America / Mexico / Mexico City     | Human | Female | 37 | Hospitalized | Pharyngeal swab                         |
| hCoV-19/Mexico/PUE_IBT_IMSS_1312/2021 | EPI_ISL_2391685 | 26/04/21 | North America / Mexico / Puebla          | Human | Male   | 82 | Hospitalized | Nasopharyngeal swab and pharyngeal swab |

|                                       |                 |          |                                          |       |        |    |              |                                         |
|---------------------------------------|-----------------|----------|------------------------------------------|-------|--------|----|--------------|-----------------------------------------|
| hCoV-19/Mexico/MEX_IBT_IMSS_1294/2021 | EPI_ISL_2391686 | 28/04/21 | North America / Mexico / State of Mexico | Human | Female | 85 | Hospitalized | Nasopharyngeal swab and pharyngeal swab |
| hCoV-19/Mexico/MEX_IBT_IMSS_1216/2021 | EPI_ISL_2391687 | 05/05/21 | North America / Mexico / State of Mexico | Human | Female | 57 | Hospitalized | Pharyngeal swab                         |
| hCoV-19/Mexico/PUE_IBT_IMSS_1338/2021 | EPI_ISL_2391689 | 28/04/21 | North America / Mexico / Puebla          | Human | Female | 47 | Hospitalized | Pharyngeal swab                         |
| hCoV-19/Mexico/PUE_IBT_IMSS_1143/2021 | EPI_ISL_2391690 | 29/04/21 | North America / Mexico / Puebla          | Human | Male   | 45 | Hospitalized | Nasopharyngeal swab and pharyngeal swab |
| hCoV-19/Mexico/CHH_IBT_IMSS_1364/2021 | EPI_ISL_2391691 | 10/03/21 | North America / Mexico / Chihuahua       | Human | Female | 65 | Hospitalized | Nasopharyngeal swab and pharyngeal swab |
| hCoV-19/Mexico/MEX_IBT_IMSS_1160/2021 | EPI_ISL_2391692 | 01/05/21 | North America / Mexico / State of Mexico | Human | Male   | 53 | Hospitalized | Nasopharyngeal swab and pharyngeal swab |
| hCoV-19/Mexico/MEX_IBT_IMSS_1222/2021 | EPI_ISL_2391693 | 04/05/21 | North America / Mexico / State of Mexico | Human | Female | 85 | Hospitalized | Nasopharyngeal swab and pharyngeal swab |
| hCoV-19/Mexico/CMX_IBT_IMSS_1280/2021 | EPI_ISL_2391695 | 23/04/21 | North America / Mexico / Mexico City     | Human | Female | 68 | Hospitalized | Nasopharyngeal swab and pharyngeal swab |
| hCoV-19/Mexico/PUE_IBT_IMSS_1141/2021 | EPI_ISL_2391696 | 28/04/21 | North America / Mexico / Puebla          | Human | Male   | 0  | Ambulatory   | Nasopharyngeal swab and pharyngeal swab |
| hCoV-19/Mexico/VER_IBT_IMSS_1299/2021 | EPI_ISL_2391697 | 28/04/21 | North America / Mexico / Veracruz        | Human | Male   | 42 | Ambulatory   | Nasopharyngeal swab and pharyngeal swab |
| hCoV-19/Mexico/CMX_IBT_IMSS_1261/2021 | EPI_ISL_2391698 | 26/04/21 | North America / Mexico / Mexico City     | Human | Female | 48 | Ambulatory   | Nasopharyngeal swab and pharyngeal swab |
| hCoV-19/Mexico/PUE_IBT_IMSS_1253/2021 | EPI_ISL_2391699 | 04/05/21 | North America / Mexico / Puebla          | Human | Female | 64 | Ambulatory   | Nasopharyngeal swab and pharyngeal swab |
| hCoV-19/Mexico/MEX_IBT_IMSS_1154/2021 | EPI_ISL_2391700 | 02/05/21 | North America / Mexico / State of Mexico | Human | Female | 71 | Hospitalized | Nasopharyngeal swab and pharyngeal swab |
| hCoV-19/Mexico/CMX_IBT_IMSS_1223/2021 | EPI_ISL_2391701 | 04/05/21 | North America / Mexico / Mexico City     | Human | Male   | 37 | Hospitalized | Nasopharyngeal swab and pharyngeal swab |
| hCoV-19/Mexico/CMX_IBT_IMSS_1382/2021 | EPI_ISL_2391702 | 21/03/21 | North America / Mexico / Mexico City     | Human | Male   | 60 | Hospitalized | Nasopharyngeal swab and pharyngeal swab |
| hCoV-19/Mexico/CMX_IBT_IMSS_1260/2021 | EPI_ISL_2391703 | 08/05/21 | North America / Mexico / Mexico City     | Human | Male   | 82 | Hospitalized | Nasopharyngeal swab                     |
| hCoV-19/Mexico/MEX_IBT_IMSS_1271/2021 | EPI_ISL_2391704 | 22/04/21 | North America / Mexico / State of Mexico | Human | Male   | 56 | Ambulatory   | Nasopharyngeal swab and pharyngeal swab |
| hCoV-19/Mexico/MEX_IBT_IMSS_1220/2021 | EPI_ISL_2391705 | 22/04/21 | North America / Mexico / State of Mexico | Human | Female | 50 | Ambulatory   | Nasopharyngeal swab and pharyngeal swab |
| hCoV-19/Mexico/VER_IBT_IMSS_1296/2021 | EPI_ISL_2391706 | 26/04/21 | North America / Mexico / Veracruz        | Human | Female | 49 | Ambulatory   | Nasopharyngeal swab and pharyngeal swab |
| hCoV-19/Mexico/VER_IBT_IMSS_1197/2021 | EPI_ISL_2391707 | 29/04/21 | North America / Mexico / State of Mexico | Human | Male   | 37 | Ambulatory   | Nasopharyngeal swab and pharyngeal swab |
| hCoV-19/Mexico/VER_IBT_IMSS_1194/2021 | EPI_ISL_2391708 | 03/05/21 | North America / Mexico / Veracruz        | Human | Female | 55 | Hospitalized | Nasopharyngeal swab and pharyngeal swab |
| hCoV-19/Mexico/CHH_IBT_IMSS_1377/2021 | EPI_ISL_2391709 | 06/04/21 | North America / Mexico / Chihuahua       | Human | Male   | 73 | Hospitalized | Nasopharyngeal swab and pharyngeal swab |
| hCoV-19/Mexico/SIN_IBT_IMSS_1357/2021 | EPI_ISL_2391712 | 04/04/21 | North America / Mexico / Sinaloa         | Human | Male   | 57 | Ambulatory   | Nasopharyngeal swab and pharyngeal swab |
| hCoV-19/Mexico/CMX_IBT_IMSS_1180/2021 | EPI_ISL_2391713 | 23/04/21 | North America / Mexico / Mexico City     | Human | Male   | 45 | Hospitalized | Pharyngeal swab                         |
| hCoV-19/Mexico/PUE_IBT_IMSS_1306/2021 | EPI_ISL_2391714 | 28/04/21 | North America / Mexico / Puebla          | Human | Male   | 42 | Ambulatory   | Nasopharyngeal swab                     |
| hCoV-19/Mexico/QUE_IBT_IMSS_1168/2021 | EPI_ISL_2391715 | 29/04/21 | North America / Mexico / Queretaro       | Human | Female | 43 | Ambulatory   | Nasopharyngeal swab and pharyngeal swab |
| hCoV-19/Mexico/VER_IBT_IMSS_1139/2021 | EPI_ISL_2391717 | 28/04/21 | North America / Mexico / Veracruz        | Human | Male   | 34 | Hospitalized | Nasopharyngeal swab and pharyngeal swab |
| hCoV-19/Mexico/MEX_IBT_IMSS_1137/2021 | EPI_ISL_2391718 | 30/04/21 | North America / Mexico / State of Mexico | Human | Male   | 70 | Hospitalized | Nasopharyngeal swab and pharyngeal swab |
| hCoV-19/Mexico/CHH_IBT_IMSS_1371/2021 | EPI_ISL_2391719 | 10/03/21 | North America / Mexico / Chihuahua       | Human | Male   | 51 | Hospitalized | Nasopharyngeal swab and pharyngeal swab |
| hCoV-19/Mexico/VER_IBT_IMSS_1332/2021 | EPI_ISL_2391721 | 29/04/21 | North America / Mexico / Veracruz        | Human | Male   | 51 | Ambulatory   | Nasopharyngeal swab and pharyngeal swab |
| hCoV-19/Mexico/MEX_IBT_IMSS_1227/2021 | EPI_ISL_2391722 | 04/05/21 | North America / Mexico / State of Mexico | Human | Male   | 44 | Hospitalized | Pharyngeal swab                         |
| hCoV-19/Mexico/CMX_IBT_IMSS_1337/2021 | EPI_ISL_2391723 | 28/04/21 | North America / Mexico / Mexico City     | Human | Male   | 48 | Hospitalized | Pharyngeal swab                         |
| hCoV-19/Mexico/MEX_IBT_IMSS_1184/2021 | EPI_ISL_2391724 | 03/05/21 | North America / Mexico / State of Mexico | Human | Male   | 34 | Hospitalized | Pharyngeal swab                         |
| hCoV-19/Mexico/PUE_IBT_IMSS_1257/2021 | EPI_ISL_2391725 | 06/05/21 | North America / Mexico / Puebla          | Human | Male   | 28 | Ambulatory   | Nasopharyngeal swab                     |
| hCoV-19/Mexico/CMX_IBT_IMSS_1151/2021 | EPI_ISL_2391726 | 30/04/21 | North America / Mexico / Mexico City     | Human | Male   | 65 | Hospitalized | Nasopharyngeal swab and pharyngeal swab |
| hCoV-19/Mexico/CMX_IBT_IMSS_1258/2021 | EPI_ISL_2391729 | 09/05/21 | North America / Mexico / Mexico City     | Human | Male   | 68 | Hospitalized | Pharyngeal swab                         |
| hCoV-19/Mexico/MEX_IBT_IMSS_1200/2021 | EPI_ISL_2391731 | 03/05/21 | North America / Mexico / State of Mexico | Human | Male   | 33 | Ambulatory   | Nasopharyngeal swab and pharyngeal swab |
| hCoV-19/Mexico/ZAC_IBT_IMSS_1344/2021 | EPI_ISL_2391736 | 13/03/21 | North America / Mexico / Zacatecas       | Human | Male   | 69 | Hospitalized | Nasopharyngeal swab and pharyngeal swab |
| hCoV-19/Mexico/PUE_IBT_IMSS_1205/2021 | EPI_ISL_2391737 | 02/05/21 | North America / Mexico / Puebla          | Human | Male   | 84 | Hospitalized | Nasopharyngeal swab and pharyngeal swab |
| hCoV-19/Mexico/CHH_IBT_IMSS_1368/2021 | EPI_ISL_2391739 | 12/03/21 | North America / Mexico / Chihuahua       | Human | Female | 62 | Hospitalized | Nasopharyngeal swab and pharyngeal swab |
| hCoV-19/Mexico/VER_IBT_IMSS_1241/2021 | EPI_ISL_2391740 | 05/05/21 | North America / Mexico / Veracruz        | Human | Male   | 53 | Hospitalized | Nasopharyngeal swab and pharyngeal swab |
| hCoV-19/Mexico/CMX_IBT_IMSS_1185/2021 | EPI_ISL_2391741 | 03/05/21 | North America / Mexico / Mexico City     | Human | Male   | 68 | Hospitalized | Nasopharyngeal swab and pharyngeal swab |
| hCoV-19/Mexico/PUE_IBT_IMSS_1165/2021 | EPI_ISL_2391742 | 01/05/21 | North America / Mexico / Puebla          | Human | Female | 31 | Ambulatory   | Nasopharyngeal swab and pharyngeal swab |
| hCoV-19/Mexico/VER_IBT_IMSS_1182/2021 | EPI_ISL_2391743 | 02/05/21 | North America / Mexico / Veracruz        | Human | Male   | 63 | Ambulatory   | Nasopharyngeal swab and pharyngeal swab |

|                                            |                 |          |                                          |       |        |    |              |                                         |
|--------------------------------------------|-----------------|----------|------------------------------------------|-------|--------|----|--------------|-----------------------------------------|
| hCoV-19/Mexico/CMX_IBT_IMSS_1335/2021      | EPI_ISL_2391744 | 30/04/21 | North America / Mexico / Mexico City     | Human | Female | 50 | Hospitalized | Nasopharyngeal swab and pharyngeal swab |
| hCoV-19/Mexico/CHH_IBT_IMSS_1363/2021      | EPI_ISL_2391746 | 10/03/21 | North America / Mexico / Chihuahua       | Human | Female | 31 | Hospitalized | Nasopharyngeal swab and pharyngeal swab |
| hCoV-19/Mexico/MEX_IBT_IMSS_1237/2021      | EPI_ISL_2391747 | 23/04/21 | North America / Mexico / State of Mexico | Human | Male   | 23 | Hospitalized | Nasopharyngeal swab and pharyngeal swab |
| hCoV-19/Mexico/CMX_IBT_IMSS_1153/2021      | EPI_ISL_2391748 | 03/05/21 | North America / Mexico / Mexico City     | Human | Male   | 42 | Hospitalized | Nasopharyngeal swab and pharyngeal swab |
| 1CoV-19/Mexico/NLE_LANGEBIO_IMSS_0505/2021 | EPI_ISL_2401934 | 19/04/21 | North America / Mexico / Nuevo Leon      | Human | Male   | 53 | Hospitalized | Pharyngeal / Nasopharyngeal swab        |
| 1CoV-19/Mexico/NLE_LANGEBIO_IMSS_0507/2021 | EPI_ISL_2401936 | 20/04/21 | North America / Mexico / Nuevo Leon      | Human | Female | 27 | Ambulatory   | Pharyngeal / Nasopharyngeal swab        |
| 1CoV-19/Mexico/NLE_LANGEBIO_IMSS_0510/2021 | EPI_ISL_2401938 | 20/04/21 | North America / Mexico / Nuevo Leon      | Human | Male   | 76 | Hospitalized | Pharyngeal / Nasopharyngeal swab        |
| 1CoV-19/Mexico/COA_LANGEBIO_IMSS_0512/2021 | EPI_ISL_2401939 | 19/04/21 | North America / Mexico / Coahuila        | Human | Male   | 48 | Ambulatory   | Pharyngeal / Nasopharyngeal swab        |
| 1CoV-19/Mexico/COA_LANGEBIO_IMSS_0513/2021 | EPI_ISL_2401940 | 19/04/21 | North America / Mexico / Coahuila        | Human | Female | 43 | Ambulatory   | Pharyngeal / Nasopharyngeal swab        |
| 1CoV-19/Mexico/NLE_LANGEBIO_IMSS_0518/2021 | EPI_ISL_2401945 | 20/04/21 | North America / Mexico / Nuevo Leon      | Human | Male   | 68 | Hospitalized | Pharyngeal / Nasopharyngeal swab        |
| 1CoV-19/Mexico/NLE_LANGEBIO_IMSS_0519/2021 | EPI_ISL_2401946 | 21/04/21 | North America / Mexico / Nuevo Leon      | Human | Male   | 53 | Hospitalized | Pharyngeal / Nasopharyngeal swab        |
| 1CoV-19/Mexico/NLE_LANGEBIO_IMSS_0521/2021 | EPI_ISL_2401948 | 21/04/21 | North America / Mexico / Nuevo Leon      | Human | Male   | 27 | Ambulatory   | Nasopharyngeal swab                     |
| 1CoV-19/Mexico/DUR_LANGEBIO_IMSS_0522/2021 | EPI_ISL_2401949 | 20/04/21 | North America / Mexico / Durango         | Human | Male   | 45 | Hospitalized | Pharyngeal / Nasopharyngeal swab        |
| 1CoV-19/Mexico/NLE_LANGEBIO_IMSS_0523/2021 | EPI_ISL_2401950 | 21/04/21 | North America / Mexico / Nuevo Leon      | Human | Male   | 76 | Ambulatory   | Pharyngeal / Nasopharyngeal swab        |
| 1CoV-19/Mexico/NLE_LANGEBIO_IMSS_0524/2021 | EPI_ISL_2401951 | 22/04/21 | North America / Mexico / Nuevo Leon      | Human | Female | 56 | Ambulatory   | Pharyngeal / Nasopharyngeal swab        |
| 1CoV-19/Mexico/NLE_LANGEBIO_IMSS_0527/2021 | EPI_ISL_2401954 | 22/04/21 | North America / Mexico / Nuevo Leon      | Human | Male   | 83 | Ambulatory   | Pharyngeal / Nasopharyngeal swab        |
| 1CoV-19/Mexico/DUR_LANGEBIO_IMSS_0528/2021 | EPI_ISL_2401955 | 21/04/21 | North America / Mexico / Durango         | Human | Female | 53 | Ambulatory   | Pharyngeal / Nasopharyngeal swab        |
| 1CoV-19/Mexico/CHH_LANGEBIO_IMSS_0529/2021 | EPI_ISL_2401956 | 20/04/21 | North America / Mexico / Chihuahua       | Human | Female | 54 | Hospitalized | Pharyngeal / Nasopharyngeal swab        |
| 1CoV-19/Mexico/CHH_LANGEBIO_IMSS_0531/2021 | EPI_ISL_2401958 | 20/04/21 | North America / Mexico / Chihuahua       | Human | Male   | 65 | Hospitalized | Pharyngeal / Nasopharyngeal swab        |
| 1CoV-19/Mexico/CHH_LANGEBIO_IMSS_0532/2021 | EPI_ISL_2401959 | 20/04/21 | North America / Mexico / Chihuahua       | Human | Male   | 67 | Hospitalized | Pharyngeal / Nasopharyngeal swab        |
| 1CoV-19/Mexico/NLE_LANGEBIO_IMSS_0533/2021 | EPI_ISL_2401960 | 23/04/21 | North America / Mexico / Nuevo Leon      | Human | Female | 81 | Hospitalized | Pharyngeal / Nasopharyngeal swab        |
| 1CoV-19/Mexico/TAM_LANGEBIO_IMSS_0534/2021 | EPI_ISL_2401961 | 22/04/21 | North America / Mexico / Tamaulipas      | Human | Male   | 44 | Ambulatory   | Pharyngeal / Nasopharyngeal swab        |
| 1CoV-19/Mexico/COA_LANGEBIO_IMSS_0536/2021 | EPI_ISL_2401963 | 22/04/21 | North America / Mexico / Coahuila        | Human | Female | 31 | Ambulatory   | Pharyngeal / Nasopharyngeal swab        |
| 1CoV-19/Mexico/NLE_LANGEBIO_IMSS_0537/2021 | EPI_ISL_2401964 | 23/04/21 | North America / Mexico / Nuevo Leon      | Human | Female | 10 | Hospitalized | Pharyngeal / Nasopharyngeal swab        |
| 1CoV-19/Mexico/CHH_LANGEBIO_IMSS_0540/2021 | EPI_ISL_2401967 | 21/04/21 | North America / Mexico / Chihuahua       | Human | Male   | 59 | Ambulatory   | Nasopharyngeal swab                     |
| 1CoV-19/Mexico/NLE_LANGEBIO_IMSS_0546/2021 | EPI_ISL_2401969 | 26/04/21 | North America / Mexico / Nuevo Leon      | Human | Male   | 56 | Hospitalized | Pharyngeal / Nasopharyngeal swab        |
| 1CoV-19/Mexico/NLE_LANGEBIO_IMSS_0548/2021 | EPI_ISL_2401971 | 26/04/21 | North America / Mexico / Nuevo Leon      | Human | Male   | 59 | Hospitalized | Pharyngeal / Nasopharyngeal swab        |
| 1CoV-19/Mexico/TAM_LANGEBIO_IMSS_0550/2021 | EPI_ISL_2401973 | 25/04/21 | North America / Mexico / Tamaulipas      | Human | Male   | 37 | Ambulatory   | Pharyngeal / Nasopharyngeal swab        |
| 1CoV-19/Mexico/CHH_LANGEBIO_IMSS_0557/2021 | EPI_ISL_2401980 | 23/04/21 | North America / Mexico / Chihuahua       | Human | Female | 83 | Hospitalized | Pharyngeal / Nasopharyngeal swab        |
| 1CoV-19/Mexico/CHH_LANGEBIO_IMSS_0560/2021 | EPI_ISL_2401982 | 22/04/21 | North America / Mexico / Chihuahua       | Human | Male   | 50 | Hospitalized | Nasopharyngeal swab                     |
| 1CoV-19/Mexico/CHH_LANGEBIO_IMSS_0562/2021 | EPI_ISL_2401984 | 20/04/21 | North America / Mexico / Chihuahua       | Human | Male   | 62 | Ambulatory   | Pharyngeal swab                         |
| 1CoV-19/Mexico/CHH_LANGEBIO_IMSS_0563/2021 | EPI_ISL_2401985 | 22/04/21 | North America / Mexico / Chihuahua       | Human | Female | 64 | Hospitalized | Nasopharyngeal swab                     |
| 1CoV-19/Mexico/CHH_LANGEBIO_IMSS_0564/2021 | EPI_ISL_2401986 | 23/04/21 | North America / Mexico / Chihuahua       | Human | Female | 34 | Hospitalized | Pharyngeal / Nasopharyngeal swab        |
| 1CoV-19/Mexico/NLE_LANGEBIO_IMSS_0566/2021 | EPI_ISL_2401988 | 28/04/21 | North America / Mexico / Nuevo Leon      | Human | Male   | 57 | Hospitalized | Pharyngeal / Nasopharyngeal swab        |
| 1CoV-19/Mexico/NLE_LANGEBIO_IMSS_0567/2021 | EPI_ISL_2401989 | 28/04/21 | North America / Mexico / Nuevo Leon      | Human | Female | 36 | Ambulatory   | Pharyngeal / Nasopharyngeal swab        |
| 1CoV-19/Mexico/CHH_LANGEBIO_IMSS_0573/2021 | EPI_ISL_2401993 | 27/04/21 | North America / Mexico / Chihuahua       | Human | Male   | 28 | Ambulatory   | Pharyngeal / Nasopharyngeal swab        |
| 1CoV-19/Mexico/CHH_LANGEBIO_IMSS_0574/2021 | EPI_ISL_2401994 | 26/04/21 | North America / Mexico / Chihuahua       | Human | Male   | 77 | Hospitalized | Pharyngeal / Nasopharyngeal swab        |
| 1CoV-19/Mexico/CHH_LANGEBIO_IMSS_0576/2021 | EPI_ISL_2401996 | 27/04/21 | North America / Mexico / Chihuahua       | Human | Female | 68 | Hospitalized | Pharyngeal / Nasopharyngeal swab        |
| 1CoV-19/Mexico/CHH_LANGEBIO_IMSS_0577/2021 | EPI_ISL_2401997 | 28/04/21 | North America / Mexico / Chihuahua       | Human | Male   | 79 | Hospitalized | Pharyngeal / Nasopharyngeal swab        |
| 1CoV-19/Mexico/CHH_LANGEBIO_IMSS_0579/2021 | EPI_ISL_2401999 | 21/04/21 | North America / Mexico / Chihuahua       | Human | Male   | 78 | Hospitalized | Pharyngeal / Nasopharyngeal swab        |
| 1CoV-19/Mexico/CHH_LANGEBIO_IMSS_0581/2021 | EPI_ISL_2402001 | 28/04/21 | North America / Mexico / Chihuahua       | Human | Female | 53 | Hospitalized | Pharyngeal / Nasopharyngeal swab        |
| 1CoV-19/Mexico/CHH_LANGEBIO_IMSS_0583/2021 | EPI_ISL_2402003 | 27/04/21 | North America / Mexico / Chihuahua       | Human | Female | 45 | Ambulatory   | Nasopharyngeal swab                     |
| 1CoV-19/Mexico/CHH_LANGEBIO_IMSS_0584/2021 | EPI_ISL_2402004 | 29/04/21 | North America / Mexico / Chihuahua       | Human | Male   | 75 | Hospitalized | Pharyngeal / Nasopharyngeal swab        |
| 1CoV-19/Mexico/COA_LANGEBIO_IMSS_0585/2021 | EPI_ISL_2402005 | 30/04/21 | North America / Mexico / Coahuila        | Human | Male   | 48 | Ambulatory   | Pharyngeal / Nasopharyngeal swab        |

|                                                           |          |                                          |       |        |    |              |                                  |
|-----------------------------------------------------------|----------|------------------------------------------|-------|--------|----|--------------|----------------------------------|
| 1CoV-19/Mexico/CHH_LANGEBIO_IMSS_0589/2021EPI_ISL_2402008 | 14/04/21 | North America / Mexico / Chihuahua       | Human | Male   | 69 | Hospitalized | Pharyngeal swab                  |
| 1CoV-19/Mexico/CHH_LANGEBIO_IMSS_0590/2021EPI_ISL_2402009 | 15/04/21 | North America / Mexico / Chihuahua       | Human | Female | 61 | Hospitalized | Pharyngeal / Nasopharyngeal swab |
| 1CoV-19/Mexico/TAM_LANGEBIO_IMSS_0591/2021EPI_ISL_2402010 | 16/04/21 | North America / Mexico / Tamaulipas      | Human | Female | 58 | Ambulatory   | Pharyngeal / Nasopharyngeal swab |
| 1CoV-19/Mexico/COA_LANGEBIO_IMSS_0593/2021EPI_ISL_2402012 | 15/04/21 | North America / Mexico / Coahuila        | Human | Male   | 62 | Ambulatory   | Pharyngeal / Nasopharyngeal swab |
| 1CoV-19/Mexico/CAM_LANGEBIO_IMSS_0597/2021EPI_ISL_2402016 | 13/04/21 | North America / Mexico / Campeche        | Human | Female | 42 | Hospitalized | Pharyngeal / Nasopharyngeal swab |
| 1CoV-19/Mexico/TAB_LANGEBIO_IMSS_0598/2021EPI_ISL_2402017 | 13/04/21 | North America / Mexico / Tabasco         | Human | Female | 74 | Hospitalized | Pharyngeal / Nasopharyngeal swab |
| 1CoV-19/Mexico/ROO_LANGEBIO_IMSS_0599/2021EPI_ISL_2402018 | 14/04/21 | North America / Mexico / Quintana Roo    | Human | Male   | 51 | Hospitalized | Pharyngeal / Nasopharyngeal swab |
| 1CoV-19/Mexico/TAB_LANGEBIO_IMSS_0600/2021EPI_ISL_2402019 | 15/04/21 | North America / Mexico / Tabasco         | Human | Male   | 35 | Hospitalized | Pharyngeal / Nasopharyngeal swab |
| 1CoV-19/Mexico/TAB_LANGEBIO_IMSS_0603/2021EPI_ISL_2402021 | 13/04/21 | North America / Mexico / Tabasco         | Human | Male   | 63 | Ambulatory   | Pharyngeal / Nasopharyngeal swab |
| 1CoV-19/Mexico/CAM_LANGEBIO_IMSS_0605/2021EPI_ISL_2402023 | 15/04/21 | North America / Mexico / Campeche        | Human | Male   | 51 | Hospitalized | Pharyngeal / Nasopharyngeal swab |
| 1CoV-19/Mexico/CAM_LANGEBIO_IMSS_0606/2021EPI_ISL_2402024 | 15/04/21 | North America / Mexico / Campeche        | Human | Male   | 28 | Ambulatory   | Pharyngeal / Nasopharyngeal swab |
| 1CoV-19/Mexico/TAB_LANGEBIO_IMSS_0607/2021EPI_ISL_2402025 | 16/04/21 | North America / Mexico / Tabasco         | Human | Male   | 53 | Hospitalized | Pharyngeal / Nasopharyngeal swab |
| 1CoV-19/Mexico/CHP_LANGEBIO_IMSS_0608/2021EPI_ISL_2402026 | 16/04/21 | North America / Mexico / Chiapas         | Human | Male   | 43 | Hospitalized | Pharyngeal / Nasopharyngeal swab |
| 1CoV-19/Mexico/YUC_LANGEBIO_IMSS_0609/2021EPI_ISL_2402027 | 18/04/21 | North America / Mexico / Yucatan         | Human | Female | 58 | Hospitalized | Pharyngeal / Nasopharyngeal swab |
| 1CoV-19/Mexico/YUC_LANGEBIO_IMSS_0611/2021EPI_ISL_2402029 | 20/04/21 | North America / Mexico / Yucatan         | Human | Female | 77 | Hospitalized | Pharyngeal / Nasopharyngeal swab |
| 1CoV-19/Mexico/TAB_LANGEBIO_IMSS_0612/2021EPI_ISL_2402030 | 19/04/21 | North America / Mexico / Tabasco         | Human | Male   | 45 | Ambulatory   | Pharyngeal / Nasopharyngeal swab |
| 1CoV-19/Mexico/TAB_LANGEBIO_IMSS_0613/2021EPI_ISL_2402031 | 18/04/21 | North America / Mexico / Tabasco         | Human | Male   | 95 | Hospitalized | Pharyngeal / Nasopharyngeal swab |
| 1CoV-19/Mexico/TAB_LANGEBIO_IMSS_0614/2021EPI_ISL_2402032 | 17/04/21 | North America / Mexico / Tabasco         | Human | Female | 49 | Ambulatory   | Pharyngeal / Nasopharyngeal swab |
| 1CoV-19/Mexico/YUC_LANGEBIO_IMSS_0617/2021EPI_ISL_2402034 | 20/04/21 | North America / Mexico / Yucatan         | Human | Male   | 18 | Ambulatory   | Pharyngeal / Nasopharyngeal swab |
| 1CoV-19/Mexico/YUC_LANGEBIO_IMSS_0618/2021EPI_ISL_2402035 | 20/04/21 | North America / Mexico / Yucatan         | Human | Male   | 55 | Hospitalized | Pharyngeal / Nasopharyngeal swab |
| 1CoV-19/Mexico/YUC_LANGEBIO_IMSS_0619/2021EPI_ISL_2402036 | 21/04/21 | North America / Mexico / Yucatan         | Human | Male   | 47 | Ambulatory   | Pharyngeal / Nasopharyngeal swab |
| 1CoV-19/Mexico/CAM_LANGEBIO_IMSS_0620/2021EPI_ISL_2402037 | 19/04/21 | North America / Mexico / Campeche        | Human | Female | 35 | Ambulatory   | Pharyngeal / Nasopharyngeal swab |
| 1CoV-19/Mexico/CAM_LANGEBIO_IMSS_0621/2021EPI_ISL_2402038 | 20/04/21 | North America / Mexico / Campeche        | Human | Male   | 54 | Hospitalized | Pharyngeal / Nasopharyngeal swab |
| 1CoV-19/Mexico/VER_LANGEBIO_IMSS_0622/2021EPI_ISL_2402039 | 21/04/21 | North America / Mexico / Veracruz        | Human | Male   | 38 | Hospitalized | Pharyngeal / Nasopharyngeal swab |
| 1CoV-19/Mexico/YUC_LANGEBIO_IMSS_0623/2021EPI_ISL_2402040 | 22/04/21 | North America / Mexico / Yucatan         | Human | Male   | 60 | Ambulatory   | Pharyngeal / Nasopharyngeal swab |
| 1CoV-19/Mexico/CAM_LANGEBIO_IMSS_0624/2021EPI_ISL_2402041 | 20/04/21 | North America / Mexico / Campeche        | Human | Female | 18 | Ambulatory   | Pharyngeal / Nasopharyngeal swab |
| 1CoV-19/Mexico/YUC_LANGEBIO_IMSS_0628/2021EPI_ISL_2402045 | 23/04/21 | North America / Mexico / Yucatan         | Human | Male   | 2  | Ambulatory   | Pharyngeal / Nasopharyngeal swab |
| 1CoV-19/Mexico/CAM_LANGEBIO_IMSS_0630/2021EPI_ISL_2402047 | 22/04/21 | North America / Mexico / Campeche        | Human | Male   | 39 | Ambulatory   | Pharyngeal / Nasopharyngeal swab |
| 1CoV-19/Mexico/CAM_LANGEBIO_IMSS_0631/2021EPI_ISL_2402048 | 22/04/21 | North America / Mexico / Campeche        | Human | Female | 45 | Ambulatory   | Pharyngeal / Nasopharyngeal swab |
| 1CoV-19/Mexico/YUC_LANGEBIO_IMSS_0632/2021EPI_ISL_2402049 | 24/04/21 | North America / Mexico / Yucatan         | Human | Male   | 67 | Hospitalized | Pharyngeal / Nasopharyngeal swab |
| 1CoV-19/Mexico/CAM_LANGEBIO_IMSS_0633/2021EPI_ISL_2402050 | 23/04/21 | North America / Mexico / Campeche        | Human | Female | 36 | Ambulatory   | Pharyngeal / Nasopharyngeal swab |
| 1CoV-19/Mexico/YUC_LANGEBIO_IMSS_0634/2021EPI_ISL_2402051 | 25/04/21 | North America / Mexico / Yucatan         | Human | Female | 74 | Hospitalized | Pharyngeal / Nasopharyngeal swab |
| 1CoV-19/Mexico/CAM_LANGEBIO_IMSS_0635/2021EPI_ISL_2402052 | 24/04/21 | North America / Mexico / Campeche        | Human | Male   | 54 | Hospitalized | Pharyngeal / Nasopharyngeal swab |
| 1CoV-19/Mexico/CAM_LANGEBIO_IMSS_0636/2021EPI_ISL_2402053 | 25/04/21 | North America / Mexico / Campeche        | Human | Male   | 31 | Ambulatory   | Pharyngeal / Nasopharyngeal swab |
| 1CoV-19/Mexico/CAM_LANGEBIO_IMSS_0637/2021EPI_ISL_2402054 | 25/04/21 | North America / Mexico / Campeche        | Human | Male   | 65 | Ambulatory   | Pharyngeal / Nasopharyngeal swab |
| 1CoV-19/Mexico/TAB_LANGEBIO_IMSS_0638/2021EPI_ISL_2402055 | 24/04/21 | North America / Mexico / Tabasco         | Human | Male   | 22 | Ambulatory   | Pharyngeal / Nasopharyngeal swab |
| 1CoV-19/Mexico/TAB_LANGEBIO_IMSS_0639/2021EPI_ISL_2402056 | 24/04/21 | North America / Mexico / Tabasco         | Human | Male   | 35 | Ambulatory   | Pharyngeal / Nasopharyngeal swab |
| 1CoV-19/Mexico/YUC_LANGEBIO_IMSS_0641/2021EPI_ISL_2402058 | 27/04/21 | North America / Mexico / Yucatan         | Human | Male   | 62 | Hospitalized | Nasopharyngeal swab              |
| 1CoV-19/Mexico/ROO_LANGEBIO_IMSS_0643/2021EPI_ISL_2402060 | 26/04/21 | North America / Mexico / Quintana Roo    | Human | Male   | 72 | Hospitalized | Pharyngeal / Nasopharyngeal swab |
| 1CoV-19/Mexico/CAM_LANGEBIO_IMSS_0644/2021EPI_ISL_2402061 | 26/04/21 | North America / Mexico / Campeche        | Human | Female | 33 | Ambulatory   | Pharyngeal / Nasopharyngeal swab |
| 1CoV-19/Mexico/CAM_LANGEBIO_IMSS_0646/2021EPI_ISL_2402063 | 26/04/21 | North America / Mexico / Campeche        | Human | Male   | 23 | Ambulatory   | Pharyngeal / Nasopharyngeal swab |
| 1CoV-19/Mexico/YUC_LANGEBIO_IMSS_0648/2021EPI_ISL_2402065 | 28/04/21 | North America / Mexico / Yucatan         | Human | Female | 79 | Hospitalized | Pharyngeal / Nasopharyngeal swab |
| 1CoV-19/Mexico/SLP_LANGEBIO_IMSS_0649/2021EPI_ISL_2402066 | 17/04/21 | North America / Mexico / San Luis Potosi | Human | Male   | 46 | Hospitalized | Pharyngeal / Nasopharyngeal swab |
| 1CoV-19/Mexico/ZAC_LANGEBIO_IMSS_0650/2021EPI_ISL_2402067 | 19/04/21 | North America / Mexico / Zacatecas       | Human | Male   | 26 | Ambulatory   | Pharyngeal / Nasopharyngeal swab |



|                                                           |          |                                          |       |        |    |              |                                  |
|-----------------------------------------------------------|----------|------------------------------------------|-------|--------|----|--------------|----------------------------------|
| 1CoV-19/Mexico/ZAC_LANGEBIO_IMSS_0707/2021EPI_ISL_2402121 | 30/04/21 | North America / Mexico / Zacatecas       | Human | Male   | 59 | Ambulatory   | Pharyngeal / Nasopharyngeal swab |
| 1CoV-19/Mexico/ZAC_LANGEBIO_IMSS_0709/2021EPI_ISL_2402123 | 30/04/21 | North America / Mexico / Zacatecas       | Human | Male   | 68 | Ambulatory   | Pharyngeal / Nasopharyngeal swab |
| 1CoV-19/Mexico/AGU_LANGEBIO_IMSS_0711/2021EPI_ISL_2402125 | 29/04/21 | North America / Mexico / Aguascalientes  | Human | Female | 41 | Ambulatory   | Pharyngeal / Nasopharyngeal swab |
| 1CoV-19/Mexico/ZAC_LANGEBIO_IMSS_0714/2021EPI_ISL_2402127 | 01/05/21 | North America / Mexico / Zacatecas       | Human | Female | 16 | Ambulatory   | Pharyngeal / Nasopharyngeal swab |
| 1CoV-19/Mexico/ZAC_LANGEBIO_IMSS_0715/2021EPI_ISL_2402128 | 30/04/21 | North America / Mexico / Zacatecas       | Human | Female | 56 | Ambulatory   | Pharyngeal / Nasopharyngeal swab |
| 1CoV-19/Mexico/ZAC_LANGEBIO_IMSS_0716/2021EPI_ISL_2402129 | 02/05/21 | North America / Mexico / Zacatecas       | Human | Female | 32 | Ambulatory   | Pharyngeal / Nasopharyngeal swab |
| 1CoV-19/Mexico/ZAC_LANGEBIO_IMSS_0717/2021EPI_ISL_2402130 | 01/05/21 | North America / Mexico / Zacatecas       | Human | Female | 29 | Ambulatory   | Pharyngeal / Nasopharyngeal swab |
| 1CoV-19/Mexico/ZAC_LANGEBIO_IMSS_0718/2021EPI_ISL_2402131 | 02/05/21 | North America / Mexico / Zacatecas       | Human | Male   | 72 | Ambulatory   | Pharyngeal / Nasopharyngeal swab |
| hCoV-19/Mexico/JAL_LANGEBIO_IMSS_0721/2021EPI_ISL_2402134 | 18/04/21 | North America / Mexico / Jalisco         | Human | Male   | 72 | Hospitalized | Pharyngeal / Nasopharyngeal swab |
| 1CoV-19/Mexico/SON_LANGEBIO_IMSS_0722/2021EPI_ISL_2402135 | 29/03/21 | North America / Mexico / Sonora          | Human | Male   | 82 | Hospitalized | Nasopharyngeal swab              |
| hCoV-19/Mexico/SIN_LANGEBIO_IMSS_0724/2021EPI_ISL_2402137 | 13/04/21 | North America / Mexico / Sinaloa         | Human | Female | 31 | Ambulatory   | Pharyngeal / Nasopharyngeal swab |
| hCoV-19/Mexico/JAL_LANGEBIO_IMSS_0728/2021EPI_ISL_2402140 | 20/04/21 | North America / Mexico / Jalisco         | Human | Male   | 34 | Ambulatory   | Pharyngeal / Nasopharyngeal swab |
| hCoV-19/Mexico/JAL_LANGEBIO_IMSS_0729/2021EPI_ISL_2402141 | 20/04/21 | North America / Mexico / Jalisco         | Human | Female | 67 | Ambulatory   | Pharyngeal / Nasopharyngeal swab |
| 1CoV-19/Mexico/SON_LANGEBIO_IMSS_0730/2021EPI_ISL_2402142 | 17/04/21 | North America / Mexico / Sonora          | Human | Male   | 62 | Hospitalized | Nasopharyngeal swab              |
| 1CoV-19/Mexico/GUA_LANGEBIO_IMSS_0733/2021EPI_ISL_2402145 | 20/04/21 | North America / Mexico / Guanajuato      | Human | Male   | 30 | Ambulatory   | Pharyngeal / Nasopharyngeal swab |
| hCoV-19/Mexico/JAL_LANGEBIO_IMSS_0736/2021EPI_ISL_2402147 | 21/04/21 | North America / Mexico / Jalisco         | Human | Male   | 37 | Ambulatory   | Pharyngeal / Nasopharyngeal swab |
| hCoV-19/Mexico/JAL_LANGEBIO_IMSS_0737/2021EPI_ISL_2402148 | 21/04/21 | North America / Mexico / Jalisco         | Human | Male   | 78 | Hospitalized | Pharyngeal / Nasopharyngeal swab |
| 1CoV-19/Mexico/COL_LANGEBIO_IMSS_0738/2021EPI_ISL_2402149 | 20/04/21 | North America / Mexico / Colima          | Human | Male   | 48 | Ambulatory   | Pharyngeal / Nasopharyngeal swab |
| hCoV-19/Mexico/JAL_LANGEBIO_IMSS_0739/2021EPI_ISL_2402150 | 21/04/21 | North America / Mexico / Jalisco         | Human | Male   | 59 | Hospitalized | Pharyngeal / Nasopharyngeal swab |
| 1CoV-19/Mexico/NAY_LANGEBIO_IMSS_0740/2021EPI_ISL_2402151 | 22/04/21 | North America / Mexico / Nayarit         | Human | Female | 63 | Hospitalized | Pharyngeal / Nasopharyngeal swab |
| hCoV-19/Mexico/JAL_LANGEBIO_IMSS_0743/2021EPI_ISL_2402154 | 23/04/21 | North America / Mexico / Jalisco         | Human | Female | 34 | Ambulatory   | Pharyngeal / Nasopharyngeal swab |
| hCoV-19/Mexico/JAL_LANGEBIO_IMSS_0744/2021EPI_ISL_2402155 | 23/04/21 | North America / Mexico / Jalisco         | Human | Male   | 73 | Hospitalized | Pharyngeal / Nasopharyngeal swab |
| hCoV-19/Mexico/JAL_LANGEBIO_IMSS_0745/2021EPI_ISL_2402156 | 24/04/21 | North America / Mexico / Jalisco         | Human | Male   | 79 | Hospitalized | Pharyngeal / Nasopharyngeal swab |
| hCoV-19/Mexico/JAL_LANGEBIO_IMSS_0749/2021EPI_ISL_2402160 | 25/04/21 | North America / Mexico / Jalisco         | Human | Female | 56 | Hospitalized | Pharyngeal / Nasopharyngeal swab |
| hCoV-19/Mexico/JAL_LANGEBIO_IMSS_0750/2021EPI_ISL_2402161 | 24/04/21 | North America / Mexico / Jalisco         | Human | Male   | 23 | Ambulatory   | Nasopharyngeal swab              |
| hCoV-19/Mexico/SIN_LANGEBIO_IMSS_0751/2021EPI_ISL_2402162 | 23/04/21 | North America / Mexico / Sinaloa         | Human | Female | 49 | Hospitalized | Pharyngeal / Nasopharyngeal swab |
| hCoV-19/Mexico/MIC_LANGEBIO_IMSS_0752/2021EPI_ISL_2402163 | 17/04/21 | North America / Mexico / Michoacan       | Human | Male   | 84 | Hospitalized | Pharyngeal / Nasopharyngeal swab |
| hCoV-19/Mexico/JAL_LANGEBIO_IMSS_0753/2021EPI_ISL_2402164 | 27/04/21 | North America / Mexico / Jalisco         | Human | Female | 39 | Ambulatory   | Pharyngeal / Nasopharyngeal swab |
| 1CoV-19/Mexico/COL_LANGEBIO_IMSS_0754/2021EPI_ISL_2402165 | 27/04/21 | North America / Mexico / Colima          | Human | Female | 67 | Ambulatory   | Pharyngeal / Nasopharyngeal swab |
| hCoV-19/Mexico/JAL_LANGEBIO_IMSS_0756/2021EPI_ISL_2402167 | 27/04/21 | North America / Mexico / Jalisco         | Human | Male   | 24 | Ambulatory   | Pharyngeal / Nasopharyngeal swab |
| hCoV-19/Mexico/JAL_LANGEBIO_IMSS_0761/2021EPI_ISL_2402172 | 26/04/21 | North America / Mexico / Jalisco         | Human | Male   | 29 | Ambulatory   | Nasopharyngeal swab              |
| hCoV-19/Mexico/JAL_LANGEBIO_IMSS_0762/2021EPI_ISL_2402173 | 26/04/21 | North America / Mexico / Jalisco         | Human | Male   | 21 | Ambulatory   | Nasopharyngeal swab              |
| hCoV-19/Mexico/JAL_LANGEBIO_IMSS_0763/2021EPI_ISL_2402174 | 30/04/21 | North America / Mexico / Jalisco         | Human | Female | 30 | Ambulatory   | Pharyngeal / Nasopharyngeal swab |
| hCoV-19/Mexico/JAL_LANGEBIO_IMSS_0764/2021EPI_ISL_2402175 | 01/05/21 | North America / Mexico / Jalisco         | Human | Male   | 90 | Hospitalized | Pharyngeal / Nasopharyngeal swab |
| hCoV-19/Mexico/JAL_LANGEBIO_IMSS_0766/2021EPI_ISL_2402177 | 30/04/21 | North America / Mexico / Jalisco         | Human | Male   | 31 | Hospitalized | Pharyngeal / Nasopharyngeal swab |
| 1CoV-19/Mexico/CMX_LANGEBIO_IMSS_0771/2021EPI_ISL_2402182 | 19/04/21 | North America / Mexico / Mexico City     | Human | Male   | 68 | Hospitalized | Pharyngeal swab                  |
| 1CoV-19/Mexico/CMX_LANGEBIO_IMSS_0772/2021EPI_ISL_2402183 | 19/04/21 | North America / Mexico / Mexico City     | Human | Female | 42 | Hospitalized | Pharyngeal swab                  |
| 1CoV-19/Mexico/CMX_LANGEBIO_IMSS_0773/2021EPI_ISL_2402184 | 20/04/21 | North America / Mexico / Mexico City     | Human | Female | 58 | Ambulatory   | Nasopharyngeal swab              |
| 1CoV-19/Mexico/CMX_LANGEBIO_IMSS_0774/2021EPI_ISL_2402185 | 19/04/21 | North America / Mexico / Mexico City     | Human | Female | 64 | Hospitalized | Pharyngeal swab                  |
| 1CoV-19/Mexico/QUE_LANGEBIO_IMSS_0775/2021EPI_ISL_2402186 | 18/04/21 | North America / Mexico / Queretaro       | Human | Male   | 45 | Ambulatory   | Pharyngeal / Nasopharyngeal swab |
| 1CoV-19/Mexico/MEX_LANGEBIO_IMSS_0776/2021EPI_ISL_2402187 | 20/04/21 | North America / Mexico / State of Mexico | Human | Male   | 70 | Ambulatory   | Pharyngeal swab                  |
| 1CoV-19/Mexico/PUE_LANGEBIO_IMSS_0777/2021EPI_ISL_2402188 | 18/04/21 | North America / Mexico / Puebla          | Human | Female | 29 | Ambulatory   | Pharyngeal swab                  |
| 1CoV-19/Mexico/PUE_LANGEBIO_IMSS_0778/2021EPI_ISL_2402189 | 18/04/21 | North America / Mexico / Puebla          | Human | Female | 45 | Ambulatory   | Pharyngeal swab                  |
| 1CoV-19/Mexico/VER_LANGEBIO_IMSS_0780/2021EPI_ISL_2402191 | 19/04/21 | North America / Mexico / Veracruz        | Human | Female | 35 | Ambulatory   | Pharyngeal / Nasopharyngeal swab |



|                                                           |          |                                          |       |        |    |              |                                  |
|-----------------------------------------------------------|----------|------------------------------------------|-------|--------|----|--------------|----------------------------------|
| 1CoV-19/Mexico/MEX_LANGEBIO_IMSS_0781/2021EPI_ISL_2402192 | 20/04/21 | North America / Mexico / State of Mexico | Human | Female | 34 | Ambulatory   | Pharyngeal / Nasopharyngeal swab |
| 1CoV-19/Mexico/MEX_LANGEBIO_IMSS_0782/2021EPI_ISL_2402193 | 22/04/21 | North America / Mexico / State of Mexico | Human | Female | 50 | Hospitalized | Pharyngeal / Nasopharyngeal swab |
| 1CoV-19/Mexico/QUE_LANGEBIO_IMSS_0784/2021EPI_ISL_2402195 | 23/04/21 | North America / Mexico / Queretaro       | Human | Female | 76 | Hospitalized | Pharyngeal / Nasopharyngeal swab |
| 1CoV-19/Mexico/OAX_LANGEBIO_IMSS_0785/2021EPI_ISL_2402196 | 21/04/21 | North America / Mexico / Oaxaca          | Human | Female | 31 | Ambulatory   | Pharyngeal / Nasopharyngeal swab |
| 1CoV-19/Mexico/OAX_LANGEBIO_IMSS_0786/2021EPI_ISL_2402197 | 21/04/21 | North America / Mexico / Oaxaca          | Human | Male   | 37 | Ambulatory   | Pharyngeal / Nasopharyngeal swab |
| 1CoV-19/Mexico/OAX_LANGEBIO_IMSS_0787/2021EPI_ISL_2402198 | 21/04/21 | North America / Mexico / Oaxaca          | Human | Female | 32 | Ambulatory   | Pharyngeal / Nasopharyngeal swab |
| 1CoV-19/Mexico/OAX_LANGEBIO_IMSS_0788/2021EPI_ISL_2402199 | 22/04/21 | North America / Mexico / Oaxaca          | Human | Male   | 57 | Ambulatory   | Pharyngeal / Nasopharyngeal swab |
| 1CoV-19/Mexico/VER_LANGEBIO_IMSS_0789/2021EPI_ISL_2402200 | 19/04/21 | North America / Mexico / Veracruz        | Human | Female | 59 | Hospitalized | Pharyngeal / Nasopharyngeal swab |
| 1CoV-19/Mexico/VER_LANGEBIO_IMSS_0790/2021EPI_ISL_2402201 | 19/04/21 | North America / Mexico / Veracruz        | Human | Male   | 32 | Ambulatory   | Pharyngeal / Nasopharyngeal swab |
| 1CoV-19/Mexico/VER_LANGEBIO_IMSS_0791/2021EPI_ISL_2402202 | 19/04/21 | North America / Mexico / Veracruz        | Human | Male   | 63 | Ambulatory   | Pharyngeal / Nasopharyngeal swab |
| 1CoV-19/Mexico/VER_LANGEBIO_IMSS_0792/2021EPI_ISL_2402203 | 20/04/21 | North America / Mexico / Veracruz        | Human | Male   | 32 | Ambulatory   | Pharyngeal / Nasopharyngeal swab |
| 1CoV-19/Mexico/MEX_LANGEBIO_IMSS_0795/2021EPI_ISL_2402205 | 20/04/21 | North America / Mexico / State of Mexico | Human | Male   | 43 | Ambulatory   | Pharyngeal swab                  |
| 1CoV-19/Mexico/VER_LANGEBIO_IMSS_0796/2021EPI_ISL_2402206 | 21/04/21 | North America / Mexico / Veracruz        | Human | Female | 76 | Ambulatory   | Pharyngeal / Nasopharyngeal swab |
| 1CoV-19/Mexico/VER_LANGEBIO_IMSS_0797/2021EPI_ISL_2402207 | 21/04/21 | North America / Mexico / Veracruz        | Human | Female | 46 | Hospitalized | Pharyngeal / Nasopharyngeal swab |
| 1CoV-19/Mexico/VER_LANGEBIO_IMSS_0798/2021EPI_ISL_2402208 | 21/04/21 | North America / Mexico / Veracruz        | Human | Male   | 74 | Ambulatory   | Pharyngeal / Nasopharyngeal swab |
| 1CoV-19/Mexico/PUE_LANGEBIO_IMSS_0799/2021EPI_ISL_2402209 | 21/04/21 | North America / Mexico / Puebla          | Human | Male   | 49 | Ambulatory   | Pharyngeal / Nasopharyngeal swab |
| 1CoV-19/Mexico/PUE_LANGEBIO_IMSS_0800/2021EPI_ISL_2402210 | 21/04/21 | North America / Mexico / Puebla          | Human | Male   | 42 | Ambulatory   | Pharyngeal swab                  |
| 1CoV-19/Mexico/PUE_LANGEBIO_IMSS_0801/2021EPI_ISL_2402211 | 21/04/21 | North America / Mexico / Puebla          | Human | Male   | 57 | Hospitalized | Pharyngeal / Nasopharyngeal swab |
| 1CoV-19/Mexico/TLA_LANGEBIO_IMSS_0802/2021EPI_ISL_2402212 | 22/04/21 | North America / Mexico / Tlaxcala        | Human | Male   | 43 | Hospitalized | Pharyngeal / Nasopharyngeal swab |
| 1CoV-19/Mexico/VER_LANGEBIO_IMSS_0803/2021EPI_ISL_2402213 | 21/04/21 | North America / Mexico / Veracruz        | Human | Female | 33 | Hospitalized | Pharyngeal / Nasopharyngeal swab |
| 1CoV-19/Mexico/VER_LANGEBIO_IMSS_0804/2021EPI_ISL_2402214 | 21/04/21 | North America / Mexico / Veracruz        | Human | Female | 70 | Hospitalized | Pharyngeal / Nasopharyngeal swab |
| hCoV-19/Mexico/HID_LANGEBIO_IMSS_0805/2021EPI_ISL_2402215 | 23/04/21 | North America / Mexico / Hidalgo         | Human | Male   | 55 | Ambulatory   | Pharyngeal swab                  |
| hCoV-19/Mexico/HID_LANGEBIO_IMSS_0807/2021EPI_ISL_2402217 | 26/04/21 | North America / Mexico / Hidalgo         | Human | Male   | 60 | Ambulatory   | Pharyngeal swab                  |
| hCoV-19/Mexico/HID_LANGEBIO_IMSS_0808/2021EPI_ISL_2402218 | 26/04/21 | North America / Mexico / Hidalgo         | Human | Female | 62 | Ambulatory   | Pharyngeal swab                  |
| hCoV-19/Mexico/HID_LANGEBIO_IMSS_0809/2021EPI_ISL_2402219 | 26/04/21 | North America / Mexico / Hidalgo         | Human | Female | 47 | Hospitalized | Pharyngeal / Nasopharyngeal swab |
| hCoV-19/Mexico/HID_LANGEBIO_IMSS_0813/2021EPI_ISL_2402223 | 26/04/21 | North America / Mexico / Hidalgo         | Human | Male   | 50 | Ambulatory   | Pharyngeal swab                  |
| hCoV-19/Mexico/HID_LANGEBIO_IMSS_0814/2021EPI_ISL_2402224 | 26/04/21 | North America / Mexico / Hidalgo         | Human | Male   | 59 | Hospitalized | Pharyngeal / Nasopharyngeal swab |
| 1CoV-19/Mexico/CHP_LANGEBIO_IMSS_0816/2021EPI_ISL_2402226 | 27/04/21 | North America / Mexico / Chiapas         | Human | Male   | 59 | Hospitalized | Pharyngeal / Nasopharyngeal swab |
| 1CoV-19/Mexico/PUE_LANGEBIO_IMSS_0817/2021EPI_ISL_2402227 | 21/04/21 | North America / Mexico / Puebla          | Human | Male   | 45 | Ambulatory   | Pharyngeal / Nasopharyngeal swab |
| 1CoV-19/Mexico/MOR_LANGEBIO_IMSS_0818/2021EPI_ISL_2402228 | 28/04/21 | North America / Mexico / Morelos         | Human | Male   | 34 | Hospitalized | Pharyngeal / Nasopharyngeal swab |
| hCoV-19/Mexico/CMX-INMEGEN-05-04-124/2021 EPI_ISL_2443073 | 14/05/21 | North America / Mexico / Mexico City     | Human | Female | 41 | unknown      | Oro-pharyngeal swab              |
| hCoV-19/Mexico/CMX-INMEGEN-05-04-222/2021 EPI_ISL_2443079 | 15/05/21 | North America / Mexico / Mexico City     | Human | Male   | 57 | unknown      | Oro-pharyngeal swab              |
| hCoV-19/Mexico/MEX-INMEGEN-05-05-1/2021 EPI_ISL_2444397   | 21/05/21 | North America / Mexico / State of Mexico | Human | Male   | 27 | unknown      |                                  |
| hCoV-19/Mexico/CMX-INMEGEN-05-05-2/2021 EPI_ISL_2444398   | 21/05/21 | North America / Mexico / Mexico City     | Human | Male   | 24 | unknown      |                                  |
| hCoV-19/Mexico/CMX-INMEGEN-05-05-5/2021 EPI_ISL_2444401   | 22/05/21 | North America / Mexico / Mexico City     | Human | Female | 39 | unknown      |                                  |
| hCoV-19/Mexico/HID-INMEGEN-05-05-7/2021 EPI_ISL_2444403   | 23/05/21 | North America / Mexico / Hidalgo         | Human | Male   | 34 | unknown      |                                  |
| hCoV-19/Mexico/CMX-INMEGEN-05-05-12/2021 EPI_ISL_2444405  | 22/05/21 | North America / Mexico / Mexico City     | Human | Female | 44 | unknown      |                                  |
| hCoV-19/Mexico/MEX-INMEGEN-05-05-14/2021 EPI_ISL_2444406  | 23/05/21 | North America / Mexico / State of Mexico | Human | Female | 28 | unknown      |                                  |
| hCoV-19/Mexico/MEX-INMEGEN-05-05-18/2021 EPI_ISL_2444410  | 21/05/21 | North America / Mexico / State of Mexico | Human | Male   | 54 | unknown      |                                  |
| hCoV-19/Mexico/MEX-INMEGEN-05-05-22/2021 EPI_ISL_2444413  | 23/05/21 | North America / Mexico / State of Mexico | Human | Female | 55 | unknown      |                                  |
| hCoV-19/Mexico/MEX-INMEGEN-05-05-23/2021 EPI_ISL_2444414  | 23/05/21 | North America / Mexico / State of Mexico | Human | Male   | 46 | unknown      |                                  |
| hCoV-19/Mexico/CMX-INMEGEN-05-05-26/2021 EPI_ISL_2444416  | 21/05/21 | North America / Mexico / Mexico City     | Human | Female | 27 | unknown      |                                  |
| hCoV-19/Mexico/MEX-INMEGEN-05-05-31/2021 EPI_ISL_2444419  | 23/05/21 | North America / Mexico / State of Mexico | Human | Female | 58 | unknown      |                                  |
| hCoV-19/Mexico/MEX-INMEGEN-05-05-33/2021 EPI_ISL_2444420  | 21/05/21 | North America / Mexico / State of Mexico | Human | Male   | 63 | unknown      |                                  |



|                                              |                 |          |                                          |       |        |              |                         |                    |
|----------------------------------------------|-----------------|----------|------------------------------------------|-------|--------|--------------|-------------------------|--------------------|
| hCoV-19/Mexico/CMX-INMEGEN-05-05-233/2021    | EPI_ISL_2444539 | 20/05/21 | North America / Mexico / Mexico City     | Human | Male   | 16           | unknown                 |                    |
| hCoV-19/Mexico/CMX-INMEGEN-05-05-241/2021    | EPI_ISL_2444543 | 20/05/21 | North America / Mexico / State of Mexico | Human | Male   | 79           | unknown                 |                    |
| hCoV-19/Mexico/MEX-INMEGEN-05-05-245/2021    | EPI_ISL_2444544 | 20/05/21 | North America / Mexico / State of Mexico | Human | Male   | 25           | unknown                 |                    |
| hCoV-19/Mexico/CMX-INMEGEN-05-05-249/2021    | EPI_ISL_2444547 | 20/05/21 | North America / Mexico / Mexico City     | Human | Female | 54           | unknown                 |                    |
| hCoV-19/Mexico/CMX-INMEGEN-05-05-255/2021    | EPI_ISL_2444550 | 20/05/21 | North America / Mexico / State of Mexico | Human | Male   | 31           | unknown                 |                    |
| hCoV-19/Mexico/MEX-INMEGEN-05-05-257/2021    | EPI_ISL_2444551 | 20/05/21 | North America / Mexico / State of Mexico | Human | Male   | 26           | unknown                 |                    |
| hCoV-19/Mexico/MEX-INMEGEN-05-05-271/2021    | EPI_ISL_2444554 | 20/05/21 | North America / Mexico / State of Mexico | Human | Female | 31           | unknown                 |                    |
| hCoV-19/Mexico/MEX-INMEGEN-05-05-272/2021    | EPI_ISL_2444555 | 20/05/21 | North America / Mexico / State of Mexico | Human | Male   | 17           | unknown                 |                    |
| hCoV-19/Mexico/MEX-INMEGEN-05-05-276/2021    | EPI_ISL_2444556 | 20/05/21 | North America / Mexico / State of Mexico | Human | Female | 33           | unknown                 |                    |
| hCoV-19/Mexico/CMX-INMEGEN-05-05-278/2021    | EPI_ISL_2444557 | 20/05/21 | North America / Mexico / Mexico City     | Human | Female | 42           | unknown                 |                    |
| hCoV-19/Mexico/HID-INMEGEN-05-05-281/2021    | EPI_ISL_2444560 | 20/05/21 | North America / Mexico / Hidalgo         | Human | Female | 26           | unknown                 |                    |
| hCoV-19/Mexico/QUE-IN-DRE_FB15762_S2538/2021 | EPI_ISL_2479877 | 04/05/21 | North America / Mexico / Queretaro       | Human | Female | 36           | Released                | Oropharyngeal swab |
| hCoV-19/Mexico/QUE-IN-DRE_FB15773_S2540/2021 | EPI_ISL_2479878 | 05/05/21 | North America / Mexico / Queretaro       | Human | Male   | 31           | Released                | Oropharyngeal swab |
| hCoV-19/Mexico/QUE-IN-DRE_FB15784_S2543/2021 | EPI_ISL_2479879 | 06/05/21 | North America / Mexico / Queretaro       | Human | Male   | 44           | Released                | Oropharyngeal swab |
| hCoV-19/Mexico/QUE-IN-DRE_FB15805_S2547/2021 | EPI_ISL_2479881 | 13/05/21 | North America / Mexico / Queretaro       | Human | Female | 49           | Released                | Oropharyngeal swab |
| hCoV-19/Mexico/CHP-IN-DRE_FB14861_S2552/2021 | EPI_ISL_2479885 | 03/05/21 | North America / Mexico / Chiapas         | Human | Male   | 49           | Deceased                | Oropharyngeal swab |
| hCoV-19/Mexico/NLE-IN-DRE_FB16181_S2573/2021 | EPI_ISL_2479896 | 18/05/21 | North America / Mexico / Nuevo Leon      | Human | Male   | 60           | Hospitalized            | Oropharyngeal swab |
| hCoV-19/Mexico/MOR-IN-DRE_FB16233_S2586/2021 | EPI_ISL_2479900 | 18/05/21 | North America / Mexico / Morelos         | Human | Female | 49           | Released                | Oropharyngeal swab |
| hCoV-19/Mexico/HID-IN-DRE_FB14669_S2587/2021 | EPI_ISL_2479901 | 01/05/21 | North America / Mexico / Hidalgo         | Human | Male   | 60           | Hospitalized            | Oropharyngeal swab |
| hCoV-19/Mexico/PUE-IN-DRE_FB16503_S2594/2021 | EPI_ISL_2479904 | 03/05/21 | North America / Mexico / Puebla          | Human | Female | 45           | Released                | Oropharyngeal swab |
| hCoV-19/Mexico/QUE-IN-DRE_FB16149_S2610/2021 | EPI_ISL_2479913 | 17/05/21 | North America / Mexico / Queretaro       | Human | Female | 65           | Released                | Oropharyngeal swab |
| hCoV-19/Mexico/ZAC_INER_IMSS_1192/2021       | EPI_ISL_2490310 | 04/05/21 | North America / Mexico / Zacatecas       | Human | 52     | Ambulatory   | and oropharyngeal swabs |                    |
| hCoV-19/Mexico/ZAC_INER_IMSS_1239/2021       | EPI_ISL_2490335 | 13/05/21 | North America / Mexico / Zacatecas       | Human | 36     | Ambulatory   | and oropharyngeal swabs |                    |
| hCoV-19/Mexico/CMX_INER_IMSS_1298/2021       | EPI_ISL_2490336 | 08/05/21 | North America / Mexico / Mexico City     | Human | 55     | hospitalized | and oropharyngeal swabs |                    |
| hCoV-19/Mexico/CMX_INER_IMSS_1251/2021       | EPI_ISL_2490354 | 09/05/21 | North America / Mexico / Mexico City     | Human | 54     | hospitalized | and oropharyngeal swabs |                    |
| hCoV-19/Mexico/CMX_INER_IMSS_1259/2021       | EPI_ISL_2490355 | 11/05/21 | North America / Mexico / Mexico City     | Human | 74     | hospitalized | oropharyngeal swab      |                    |
| hCoV-19/Mexico/NAY_INER_IMSS_1166/2021       | EPI_ISL_2490395 | 03/05/21 | North America / Mexico / Nayarit         | Human | 48     | Ambulatory   | and oropharyngeal swabs |                    |
| hCoV-19/Mexico/COL_INER_IMSS_1175/2021       | EPI_ISL_2490397 | 08/05/21 | North America / Mexico / Colima          | Human | 71     | hospitalized | and oropharyngeal swabs |                    |
| hCoV-19/Mexico/COL_INER_IMSS_1176/2021       | EPI_ISL_2490398 | 08/05/21 | North America / Mexico / Colima          | Human | 72     | hospitalized | and oropharyngeal swabs |                    |
| hCoV-19/Mexico/COL_INER_IMSS_1182/2021       | EPI_ISL_2490399 | 11/05/21 | North America / Mexico / Colima          | Human | 94     | hospitalized | and oropharyngeal swabs |                    |
| hCoV-19/Mexico/COL_INER_IMSS_1183/2021       | EPI_ISL_2490400 | 11/05/21 | North America / Mexico / Colima          | Human | 65     | hospitalized | and oropharyngeal swabs |                    |
| hCoV-19/Mexico/MEX_INER_IMSS_1302/2021       | EPI_ISL_2490402 | 11/05/21 | North America / Mexico / State of Mexico | Human | 24     | Ambulatory   | and oropharyngeal swabs |                    |
| hCoV-19/Mexico/CMX_INER_IMSS_1260/2021       | EPI_ISL_2490403 | 10/05/21 | North America / Mexico / Mexico City     | Human | 50     | hospitalized | and oropharyngeal swabs |                    |
| hCoV-19/Mexico/SIN_INER_IMSS_1169/2021       | EPI_ISL_2490404 | 04/05/21 | North America / Mexico / Sinaloa         | Human | 48     | hospitalized | and oropharyngeal swabs |                    |
| hCoV-19/Mexico/COA_INER_IMSS_1070/2021       | EPI_ISL_2490410 | 06/05/21 | North America / Mexico / Coahuila        | Human | 30     | Ambulatory   | and oropharyngeal swabs |                    |
| hCoV-19/Mexico/MEX_INER_IMSS_1261/2021       | EPI_ISL_2490412 | 09/05/21 | North America / Mexico / State of Mexico | Human | 52     | hospitalized | and oropharyngeal swabs |                    |
| hCoV-19/Mexico/MEX_INER_IMSS_1262/2021       | EPI_ISL_2490413 | 09/05/21 | North America / Mexico / State of Mexico | Human | 52     | hospitalized | and oropharyngeal swabs |                    |
| hCoV-19/Mexico/PUE_INER_IMSS_1289/2021       | EPI_ISL_2490414 | 07/05/21 | North America / Mexico / Puebla          | Human | 49     | Ambulatory   | oropharyngeal swab      |                    |
| hCoV-19/Mexico/CAM_INER_IMSS_1293/2021       | EPI_ISL_2490415 | 07/05/21 | North America / Mexico / Campeche        | Human | 48     | hospitalized | oropharyngeal swab      |                    |
| hCoV-19/Mexico/MEX_INER_IMSS_1246/2021       | EPI_ISL_2490416 | 08/05/21 | North America / Mexico / State of Mexico | Human | 71     | hospitalized | and oropharyngeal swabs |                    |
| hCoV-19/Mexico/PUE_INER_IMSS_1286/2021       | EPI_ISL_2490417 | 05/05/21 | North America / Mexico / Puebla          | Human | 32     | Ambulatory   | and oropharyngeal swabs |                    |
| hCoV-19/Mexico/CMX_INER_IMSS_1255/2021       | EPI_ISL_2490423 | 10/05/21 | North America / Mexico / Mexico City     | Human | 64     | hospitalized | and oropharyngeal swabs |                    |
| hCoV-19/Mexico/ZAC_INER_IMSS_1204/2021       | EPI_ISL_2490424 | 06/05/21 | North America / Mexico / Zacatecas       | Human | 20     | Ambulatory   | and oropharyngeal swabs |                    |
| hCoV-19/Mexico/MEX_INER_IMSS_1258/2021       | EPI_ISL_2490425 | 08/05/21 | North America / Mexico / State of Mexico | Human | 48     | hospitalized | oropharyngeal swab      |                    |

|                                        |                 |          |                                          |       |    |                                       |
|----------------------------------------|-----------------|----------|------------------------------------------|-------|----|---------------------------------------|
| hCoV-19/Mexico/NLE_INER_IMSS_1074/2021 | EPI_ISL_2490426 | 08/05/21 | North America / Mexico / Nuevo Leon      | Human | 61 | Ambulatoryopharyngeal swab            |
| hCoV-19/Mexico/CHH_INER_IMSS_1053/2021 | EPI_ISL_2490428 | 03/05/21 | North America / Mexico / Chihuahua       | Human | 59 | Ambulatoryopharyngeal swab            |
| hCoV-19/Mexico/CHH_INER_IMSS_1054/2021 | EPI_ISL_2490429 | 02/05/21 | North America / Mexico / Chihuahua       | Human | 68 | hospitalizeopharyngeal swab           |
| hCoV-19/Mexico/CHH_INER_IMSS_1064/2021 | EPI_ISL_2490430 | 04/05/21 | North America / Mexico / Chihuahua       | Human | 56 | hospitalizeal and oropharyngeal swabs |
| hCoV-19/Mexico/CHH_INER_IMSS_1065/2021 | EPI_ISL_2490431 | 04/05/21 | North America / Mexico / Chihuahua       | Human | 52 | hospitalizeal and oropharyngeal swabs |
| hCoV-19/Mexico/CHH_INER_IMSS_1077/2021 | EPI_ISL_2490432 | 05/05/21 | North America / Mexico / Chihuahua       | Human | 47 | hospitalizeal and oropharyngeal swabs |
| hCoV-19/Mexico/MEX_INER_IMSS_1266/2021 | EPI_ISL_2490433 | 08/05/21 | North America / Mexico / State of Mexico | Human | 59 | hospitalizeal and oropharyngeal swabs |
| hCoV-19/Mexico/CMX_INER_IMSS_1272/2021 | EPI_ISL_2490434 | 11/05/21 | North America / Mexico / Mexico City     | Human | 58 | hospitalizeopharyngeal swab           |
| hCoV-19/Mexico/CMX_INER_IMSS_1273/2021 | EPI_ISL_2490435 | 11/05/21 | North America / Mexico / Mexico City     | Human | 25 | hospitalizeopharyngeal swab           |
| hCoV-19/Mexico/PUE_INER_IMSS_1282/2021 | EPI_ISL_2490436 | 04/05/21 | North America / Mexico / Puebla          | Human | 54 | Ambulatoryal and oropharyngeal swabs  |
| hCoV-19/Mexico/CMX_INER_IMSS_1295/2021 | EPI_ISL_2490437 | 11/05/21 | North America / Mexico / Mexico City     | Human | 48 | Ambulatoryal and oropharyngeal swabs  |
| hCoV-19/Mexico/PUE_INER_IMSS_1309/2021 | EPI_ISL_2490438 | 07/05/21 | North America / Mexico / Puebla          | Human | 57 | Ambulatoryopharyngeal swab            |
| hCoV-19/Mexico/NLE_INER_IMSS_1019/2021 | EPI_ISL_2490439 | 02/05/21 | North America / Mexico / Nuevo Leon      | Human | 61 | Ambulatoryopharyngeal swab            |
| hCoV-19/Mexico/NLE_INER_IMSS_1022/2021 | EPI_ISL_2490440 | 03/05/21 | North America / Mexico / Nuevo Leon      | Human | 28 | hospitalizeal and oropharyngeal swabs |
| hCoV-19/Mexico/NLE_INER_IMSS_1023/2021 | EPI_ISL_2490441 | 03/05/21 | North America / Mexico / Nuevo Leon      | Human | 45 | hospitalizeal and oropharyngeal swabs |
| hCoV-19/Mexico/DUR_INER_IMSS_1028/2021 | EPI_ISL_2490442 | 03/05/21 | North America / Mexico / Durango         | Human | 45 | Ambulatoryal and oropharyngeal swabs  |
| hCoV-19/Mexico/NLE_INER_IMSS_1031/2021 | EPI_ISL_2490443 | 03/05/21 | North America / Mexico / Nuevo Leon      | Human | 61 | hospitalizeal and oropharyngeal swabs |
| hCoV-19/Mexico/NLE_INER_IMSS_1032/2021 | EPI_ISL_2490444 | 04/05/21 | North America / Mexico / Nuevo Leon      | Human | 80 | hospitalizeal and oropharyngeal swabs |
| hCoV-19/Mexico/COA_INER_IMSS_1035/2021 | EPI_ISL_2490446 | 03/05/21 | North America / Mexico / Coahuila        | Human | 75 | Ambulatoryal and oropharyngeal swabs  |
| hCoV-19/Mexico/NLE_INER_IMSS_1038/2021 | EPI_ISL_2490447 | 05/05/21 | North America / Mexico / Coahuila        | Human | 33 | Ambulatoryal and oropharyngeal swabs  |
| hCoV-19/Mexico/NLE_INER_IMSS_1039/2021 | EPI_ISL_2490448 | 05/05/21 | North America / Mexico / Nuevo Leon      | Human | 39 | Ambulatoryal and oropharyngeal swabs  |
| hCoV-19/Mexico/COA_INER_IMSS_1041/2021 | EPI_ISL_2490449 | 05/05/21 | North America / Mexico / Coahuila        | Human | 54 | hospitalizeal and oropharyngeal swabs |
| hCoV-19/Mexico/CHH_INER_IMSS_1043/2021 | EPI_ISL_2490450 | 02/05/21 | North America / Mexico / Chihuahua       | Human | 55 | hospitalizeal and oropharyngeal swabs |
| hCoV-19/Mexico/COA_INER_IMSS_1045/2021 | EPI_ISL_2490451 | 04/05/21 | North America / Mexico / Coahuila        | Human | 80 | hospitalizeal and oropharyngeal swabs |
| hCoV-19/Mexico/NLE_INER_IMSS_1047/2021 | EPI_ISL_2490452 | 06/05/21 | North America / Mexico / Nuevo Leon      | Human | 52 | Ambulatoryal and oropharyngeal swabs  |
| hCoV-19/Mexico/CHH_INER_IMSS_1059/2021 | EPI_ISL_2490453 | 03/05/21 | North America / Mexico / Chihuahua       | Human | 77 | hospitalizeal and oropharyngeal swabs |
| hCoV-19/Mexico/NLE_INER_IMSS_1068/2021 | EPI_ISL_2490454 | 08/05/21 | North America / Mexico / Nuevo Leon      | Human | 43 | hospitalizeal and oropharyngeal swabs |
| hCoV-19/Mexico/COA_INER_IMSS_1071/2021 | EPI_ISL_2490455 | 06/05/21 | North America / Mexico / Coahuila        | Human | 47 | Ambulatoryal and oropharyngeal swabs  |
| hCoV-19/Mexico/NLE_INER_IMSS_1075/2021 | EPI_ISL_2490456 | 08/05/21 | North America / Mexico / Nuevo Leon      | Human | 52 | Ambulatoryopharyngeal swab            |
| hCoV-19/Mexico/COA_INER_IMSS_1081/2021 | EPI_ISL_2490458 | 07/05/21 | North America / Mexico / Coahuila        | Human | 49 | Ambulatoryal and oropharyngeal swabs  |
| hCoV-19/Mexico/NLE_INER_IMSS_1084/2021 | EPI_ISL_2490459 | 11/05/21 | North America / Mexico / Nuevo Leon      | Human | 54 | hospitalizeal and oropharyngeal swabs |
| hCoV-19/Mexico/NLE_INER_IMSS_1087/2021 | EPI_ISL_2490460 | 10/05/21 | North America / Mexico / Nuevo Leon      | Human | 60 | hospitalizeal and oropharyngeal swabs |
| hCoV-19/Mexico/NLE_INER_IMSS_1089/2021 | EPI_ISL_2490461 | 10/05/21 | North America / Mexico / Nuevo Leon      | Human | 27 | Ambulatoryal and oropharyngeal swabs  |
| hCoV-19/Mexico/NLE_INER_IMSS_1092/2021 | EPI_ISL_2490463 | 12/05/21 | North America / Mexico / Nuevo Leon      | Human | 41 | Ambulatoryal and oropharyngeal swabs  |
| hCoV-19/Mexico/CHH_INER_IMSS_1096/2021 | EPI_ISL_2490464 | 08/05/21 | North America / Mexico / Chihuahua       | Human | 52 | hospitalizeal and oropharyngeal swabs |
| hCoV-19/Mexico/COA_INER_IMSS_1098/2021 | EPI_ISL_2490465 | 09/05/21 | North America / Mexico / Coahuila        | Human | 66 | hospitalizeal and oropharyngeal swabs |
| hCoV-19/Mexico/CAM_INER_IMSS_1106/2021 | EPI_ISL_2490467 | 27/04/21 | North America / Mexico / Campeche        | Human | 44 | Ambulatoryal and oropharyngeal swabs  |
| hCoV-19/Mexico/CAM_INER_IMSS_1107/2021 | EPI_ISL_2490468 | 27/04/21 | North America / Mexico / Campeche        | Human | 32 | Ambulatoryal and oropharyngeal swabs  |
| hCoV-19/Mexico/YUC_INER_IMSS_1111/2021 | EPI_ISL_2490469 | 30/04/21 | North America / Mexico / Yucatan         | Human | 63 | hospitalizeal and oropharyngeal swabs |
| hCoV-19/Mexico/CAM_INER_IMSS_1112/2021 | EPI_ISL_2490470 | 28/04/21 | North America / Mexico / Campeche        | Human | 43 | Ambulatoryal and oropharyngeal swabs  |
| hCoV-19/Mexico/CAM_INER_IMSS_1113/2021 | EPI_ISL_2490471 | 28/04/21 | North America / Mexico / Campeche        | Human | 45 | Ambulatoryal and oropharyngeal swabs  |
| hCoV-19/Mexico/YUC_INER_IMSS_1114/2021 | EPI_ISL_2490472 | 30/04/21 | North America / Mexico / Yucatan         | Human | 20 | Ambulatoryal and oropharyngeal swabs  |
| hCoV-19/Mexico/CAM_INER_IMSS_1116/2021 | EPI_ISL_2490473 | 29/04/21 | North America / Mexico / Campeche        | Human | 26 | Ambulatoryal and oropharyngeal swabs  |
| hCoV-19/Mexico/CAM_INER_IMSS_1118/2021 | EPI_ISL_2490474 | 30/04/21 | North America / Mexico / Campeche        | Human | 30 | Ambulatoryal and oropharyngeal swabs  |

|                                        |                 |          |                                       |       |    |                                      |
|----------------------------------------|-----------------|----------|---------------------------------------|-------|----|--------------------------------------|
| hCoV-19/Mexico/YUC_INER_IMSS_1122/2021 | EPI_ISL_2490475 | 04/05/21 | North America / Mexico / Yucatan      | Human | 44 | Ambulatory and oropharyngeal swabs   |
| hCoV-19/Mexico/CAM_INER_IMSS_1125/2021 | EPI_ISL_2490476 | 02/05/21 | North America / Mexico / Campeche     | Human | 43 | Ambulatory and oropharyngeal swabs   |
| hCoV-19/Mexico/CAM_INER_IMSS_1126/2021 | EPI_ISL_2490477 | 02/05/21 | North America / Mexico / Campeche     | Human | 13 | Ambulatory and oropharyngeal swabs   |
| hCoV-19/Mexico/CAM_INER_IMSS_1127/2021 | EPI_ISL_2490478 | 02/05/21 | North America / Mexico / Campeche     | Human | 21 | Ambulatory and oropharyngeal swabs   |
| hCoV-19/Mexico/ROO_INER_IMSS_1135/2021 | EPI_ISL_2490479 | 06/05/21 | North America / Mexico / Quintana Roo | Human | 46 | Hospitalized and oropharyngeal swabs |
| hCoV-19/Mexico/TAB_INER_IMSS_1140/2021 | EPI_ISL_2490480 | 06/05/21 | North America / Mexico / Tabasco      | Human | 65 | Ambulatory and oropharyngeal swabs   |
| hCoV-19/Mexico/CAM_INER_IMSS_1142/2021 | EPI_ISL_2490481 | 06/05/21 | North America / Mexico / Campeche     | Human | 67 | Hospitalized and oropharyngeal swabs |
| hCoV-19/Mexico/CAM_INER_IMSS_1143/2021 | EPI_ISL_2490482 | 06/05/21 | North America / Mexico / Campeche     | Human | 26 | Ambulatory and oropharyngeal swabs   |
| hCoV-19/Mexico/CAM_INER_IMSS_1147/2021 | EPI_ISL_2490483 | 09/05/21 | North America / Mexico / Campeche     | Human | 75 | Hospitalized and oropharyngeal swabs |
| hCoV-19/Mexico/CAM_INER_IMSS_1149/2021 | EPI_ISL_2490484 | 08/05/21 | North America / Mexico / Campeche     | Human | 39 | Hospitalized and oropharyngeal swabs |
| hCoV-19/Mexico/CAM_INER_IMSS_1150/2021 | EPI_ISL_2490485 | 10/05/21 | North America / Mexico / Campeche     | Human | 81 | Ambulatory and oropharyngeal swabs   |
| hCoV-19/Mexico/TAB_INER_IMSS_1155/2021 | EPI_ISL_2490486 | 10/05/21 | North America / Mexico / Tabasco      | Human | 50 | Hospitalized and oropharyngeal swabs |
| hCoV-19/Mexico/TAB_INER_IMSS_1156/2021 | EPI_ISL_2490487 | 09/05/21 | North America / Mexico / Tabasco      | Human | 59 | Ambulatory and oropharyngeal swabs   |
| hCoV-19/Mexico/TAB_INER_IMSS_1157/2021 | EPI_ISL_2490488 | 10/05/21 | North America / Mexico / Tabasco      | Human | 39 | Ambulatory and oropharyngeal swabs   |
| hCoV-19/Mexico/TAB_INER_IMSS_1158/2021 | EPI_ISL_2490489 | 10/05/21 | North America / Mexico / Tabasco      | Human | 20 | Ambulatory and oropharyngeal swabs   |
| hCoV-19/Mexico/TAB_INER_IMSS_1159/2021 | EPI_ISL_2490490 | 09/05/21 | North America / Mexico / Tabasco      | Human | 68 | Hospitalized and oropharyngeal swabs |
| hCoV-19/Mexico/TAB_INER_IMSS_1160/2021 | EPI_ISL_2490491 | 09/05/21 | North America / Mexico / Tabasco      | Human | 23 | Ambulatory and oropharyngeal swabs   |
| hCoV-19/Mexico/CAM_INER_IMSS_1164/2021 | EPI_ISL_2490492 | 12/05/21 | North America / Mexico / Campeche     | Human | 62 | Hospitalized and oropharyngeal swabs |
| hCoV-19/Mexico/JAL_INER_IMSS_1167/2021 | EPI_ISL_2490493 | 05/05/21 | North America / Mexico / Jalisco      | Human | 54 | Ambulatory and oropharyngeal swabs   |
| hCoV-19/Mexico/GUA_INER_IMSS_1168/2021 | EPI_ISL_2490494 | 04/05/21 | North America / Mexico / Guanajuato   | Human | 53 | Ambulatory and oropharyngeal swabs   |
| hCoV-19/Mexico/NAY_INER_IMSS_1171/2021 | EPI_ISL_2490495 | 05/05/21 | North America / Mexico / Nayarit      | Human | 44 | Hospitalized and oropharyngeal swabs |
| hCoV-19/Mexico/JAL_INER_IMSS_1173/2021 | EPI_ISL_2490496 | 08/05/21 | North America / Mexico / Jalisco      | Human | 83 | Hospitalized and oropharyngeal swabs |
| hCoV-19/Mexico/MIC_INER_IMSS_1177/2021 | EPI_ISL_2490497 | 02/05/21 | North America / Mexico / Michoacan    | Human | 46 | Ambulatory and oropharyngeal swabs   |
| hCoV-19/Mexico/JAL_INER_IMSS_1181/2021 | EPI_ISL_2490498 | 12/05/21 | North America / Mexico / Jalisco      | Human | 69 | Hospitalized and oropharyngeal swabs |
| hCoV-19/Mexico/SON_INER_IMSS_1185/2021 | EPI_ISL_2490499 | 05/05/21 | North America / Mexico / Sonora       | Human | 83 | Hospitalized oropharyngeal swab      |
| hCoV-19/Mexico/ZAC_INER_IMSS_1188/2021 | EPI_ISL_2490500 | 03/05/21 | North America / Mexico / Zacatecas    | Human | 37 | Ambulatory and oropharyngeal swabs   |
| hCoV-19/Mexico/ZAC_INER_IMSS_1190/2021 | EPI_ISL_2490502 | 03/05/21 | North America / Mexico / Zacatecas    | Human | 35 | Ambulatory and oropharyngeal swabs   |
| hCoV-19/Mexico/ZAC_INER_IMSS_1193/2021 | EPI_ISL_2490503 | 04/05/21 | North America / Mexico / Zacatecas    | Human | 51 | Hospitalized and oropharyngeal swabs |
| hCoV-19/Mexico/ZAC_INER_IMSS_1196/2021 | EPI_ISL_2490505 | 03/05/21 | North America / Mexico / Zacatecas    | Human | 22 | Ambulatory and oropharyngeal swabs   |
| hCoV-19/Mexico/ZAC_INER_IMSS_1198/2021 | EPI_ISL_2490507 | 05/05/21 | North America / Mexico / Zacatecas    | Human | 27 | Ambulatory and oropharyngeal swabs   |
| hCoV-19/Mexico/ZAC_INER_IMSS_1199/2021 | EPI_ISL_2490508 | 05/05/21 | North America / Mexico / Zacatecas    | Human | 29 | Ambulatory and oropharyngeal swabs   |
| hCoV-19/Mexico/ZAC_INER_IMSS_1200/2021 | EPI_ISL_2490509 | 05/05/21 | North America / Mexico / Zacatecas    | Human | 34 | Ambulatory and oropharyngeal swabs   |
| hCoV-19/Mexico/ZAC_INER_IMSS_1201/2021 | EPI_ISL_2490510 | 05/05/21 | North America / Mexico / Zacatecas    | Human | 24 | Ambulatory and oropharyngeal swabs   |
| hCoV-19/Mexico/ZAC_INER_IMSS_1202/2021 | EPI_ISL_2490511 | 06/05/21 | North America / Mexico / Zacatecas    | Human | 42 | Ambulatory and oropharyngeal swabs   |
| hCoV-19/Mexico/ZAC_INER_IMSS_1203/2021 | EPI_ISL_2490512 | 06/05/21 | North America / Mexico / Zacatecas    | Human | 43 | Ambulatory and oropharyngeal swabs   |
| hCoV-19/Mexico/ZAC_INER_IMSS_1205/2021 | EPI_ISL_2490513 | 07/05/21 | North America / Mexico / Zacatecas    | Human | 42 | Ambulatory and oropharyngeal swabs   |
| hCoV-19/Mexico/ZAC_INER_IMSS_1209/2021 | EPI_ISL_2490516 | 07/05/21 | North America / Mexico / Zacatecas    | Human | 51 | Ambulatory and oropharyngeal swabs   |
| hCoV-19/Mexico/ZAC_INER_IMSS_1211/2021 | EPI_ISL_2490517 | 07/05/21 | North America / Mexico / Zacatecas    | Human | 38 | Ambulatory and oropharyngeal swabs   |
| hCoV-19/Mexico/ZAC_INER_IMSS_1213/2021 | EPI_ISL_2490518 | 08/05/21 | North America / Mexico / Zacatecas    | Human | 37 | Ambulatory and oropharyngeal swabs   |
| hCoV-19/Mexico/ZAC_INER_IMSS_1214/2021 | EPI_ISL_2490519 | 08/05/21 | North America / Mexico / Zacatecas    | Human | 15 | Ambulatory and oropharyngeal swabs   |
| hCoV-19/Mexico/ZAC_INER_IMSS_1215/2021 | EPI_ISL_2490520 | 08/05/21 | North America / Mexico / Zacatecas    | Human | 41 | Ambulatory and oropharyngeal swabs   |
| hCoV-19/Mexico/ZAC_INER_IMSS_1216/2021 | EPI_ISL_2490521 | 08/05/21 | North America / Mexico / Zacatecas    | Human | 35 | Ambulatory and oropharyngeal swabs   |
| hCoV-19/Mexico/ZAC_INER_IMSS_1219/2021 | EPI_ISL_2490522 | 09/05/21 | North America / Mexico / Zacatecas    | Human | 33 | Ambulatory and oropharyngeal swabs   |
| hCoV-19/Mexico/ZAC_INER_IMSS_1220/2021 | EPI_ISL_2490523 | 09/05/21 | North America / Mexico / Zacatecas    | Human | 38 | Ambulatory and oropharyngeal swabs   |

|                                        |                 |          |                                          |       |    |                                       |
|----------------------------------------|-----------------|----------|------------------------------------------|-------|----|---------------------------------------|
| hCoV-19/Mexico/ZAC_INER_IMSS_1223/2021 | EPI_ISL_2490526 | 10/05/21 | North America / Mexico / Zacatecas       | Human | 27 | Ambulatory and oropharyngeal swabs    |
| hCoV-19/Mexico/ZAC_INER_IMSS_1224/2021 | EPI_ISL_2490527 | 11/05/21 | North America / Mexico / Zacatecas       | Human | 49 | Ambulatory and oropharyngeal swabs    |
| hCoV-19/Mexico/ZAC_INER_IMSS_1226/2021 | EPI_ISL_2490528 | 11/05/21 | North America / Mexico / Zacatecas       | Human | 91 | Ambulatory and oropharyngeal swabs    |
| hCoV-19/Mexico/ZAC_INER_IMSS_1227/2021 | EPI_ISL_2490529 | 11/05/21 | North America / Mexico / Zacatecas       | Human | 47 | Ambulatory and oropharyngeal swabs    |
| hCoV-19/Mexico/SLP_INER_IMSS_1228/2021 | EPI_ISL_2490530 | 11/05/21 | North America / Mexico / San Luis Potosi | Human | 20 | Ambulatory and oropharyngeal swabs    |
| hCoV-19/Mexico/ZAC_INER_IMSS_1232/2021 | EPI_ISL_2490532 | 12/05/21 | North America / Mexico / Zacatecas       | Human | 37 | Ambulatory and oropharyngeal swabs    |
| hCoV-19/Mexico/ZAC_INER_IMSS_1236/2021 | EPI_ISL_2490536 | 13/05/21 | North America / Mexico / Zacatecas       | Human | 41 | Ambulatory and oropharyngeal swabs    |
| hCoV-19/Mexico/SLP_INER_IMSS_1238/2021 | EPI_ISL_2490537 | 11/05/21 | North America / Mexico / San Luis Potosi | Human | 50 | hospitalizeal and oropharyngeal swabs |
| hCoV-19/Mexico/ZAC_INER_IMSS_1240/2021 | EPI_ISL_2490538 | 14/05/21 | North America / Mexico / Zacatecas       | Human | 24 | Ambulatory and oropharyngeal swabs    |
| hCoV-19/Mexico/SLP_INER_IMSS_1242/2021 | EPI_ISL_2490539 | 13/05/21 | North America / Mexico / San Luis Potosi | Human | 0  | hospitalizeal and oropharyngeal swabs |
| hCoV-19/Mexico/ZAC_INER_IMSS_1243/2021 | EPI_ISL_2490540 | 15/05/21 | North America / Mexico / Zacatecas       | Human | 53 | Ambulatory and oropharyngeal swabs    |
| hCoV-19/Mexico/ZAC_INER_IMSS_1245/2021 | EPI_ISL_2490541 | 15/05/21 | North America / Mexico / Zacatecas       | Human | 40 | hospitalizeal and oropharyngeal swabs |
| hCoV-19/Mexico/VER_INER_IMSS_1247/2021 | EPI_ISL_2490542 | 06/05/21 | North America / Mexico / Veracruz        | Human | 42 | Ambulatory and oropharyngeal swabs    |
| hCoV-19/Mexico/MOR_INER_IMSS_1248/2021 | EPI_ISL_2490543 | 09/05/21 | North America / Mexico / Morelos         | Human | 23 | Ambulatory and oropharyngeal swabs    |
| hCoV-19/Mexico/CMX_INER_IMSS_1250/2021 | EPI_ISL_2490544 | 11/05/21 | North America / Mexico / Mexico City     | Human | 56 | hospitalizeal and oropharyngeal swabs |
| hCoV-19/Mexico/CMX_INER_IMSS_1253/2021 | EPI_ISL_2490545 | 09/05/21 | North America / Mexico / Mexico City     | Human | 59 | Ambulatory and oropharyngeal swabs    |
| hCoV-19/Mexico/CMX_INER_IMSS_1256/2021 | EPI_ISL_2490546 | 10/05/21 | North America / Mexico / Mexico City     | Human | 82 | hospitalizeal and oropharyngeal swabs |
| hCoV-19/Mexico/CMX_INER_IMSS_1257/2021 | EPI_ISL_2490547 | 10/05/21 | North America / Mexico / Mexico City     | Human | 48 | Ambulatory pharyngeal swab            |
| hCoV-19/Mexico/MEX_INER_IMSS_1263/2021 | EPI_ISL_2490548 | 09/05/21 | North America / Mexico / State of Mexico | Human | 83 | hospitalizeal and oropharyngeal swabs |
| hCoV-19/Mexico/MEX_INER_IMSS_1268/2021 | EPI_ISL_2490549 | 09/05/21 | North America / Mexico / State of Mexico | Human | 53 | hospitalizeal and oropharyngeal swab  |
| hCoV-19/Mexico/MEX_INER_IMSS_1269/2021 | EPI_ISL_2490550 | 09/05/21 | North America / Mexico / State of Mexico | Human | 38 | hospitalizeal and oropharyngeal swabs |
| hCoV-19/Mexico/CMX_INER_IMSS_1270/2021 | EPI_ISL_2490551 | 10/05/21 | North America / Mexico / Mexico City     | Human | 64 | hospitalizeal and oropharyngeal swabs |
| hCoV-19/Mexico/CMX_INER_IMSS_1271/2021 | EPI_ISL_2490552 | 10/05/21 | North America / Mexico / Mexico City     | Human | 58 | hospitalizeal and oropharyngeal swab  |
| hCoV-19/Mexico/MEX_INER_IMSS_1275/2021 | EPI_ISL_2490553 | 10/05/21 | North America / Mexico / State of Mexico | Human | 32 | Ambulatory and oropharyngeal swabs    |
| hCoV-19/Mexico/PUE_INER_IMSS_1276/2021 | EPI_ISL_2490554 | 08/05/21 | North America / Mexico / Puebla          | Human | 53 | hospitalizeal and oropharyngeal swabs |
| hCoV-19/Mexico/PUE_INER_IMSS_1278/2021 | EPI_ISL_2490555 | 09/05/21 | North America / Mexico / Puebla          | Human | 51 | hospitalizeal and oropharyngeal swabs |
| hCoV-19/Mexico/PUE_INER_IMSS_1279/2021 | EPI_ISL_2490556 | 08/05/21 | North America / Mexico / Puebla          | Human | 34 | hospitalizeal and oropharyngeal swabs |
| hCoV-19/Mexico/PUE_INER_IMSS_1280/2021 | EPI_ISL_2490557 | 08/05/21 | North America / Mexico / Puebla          | Human | 53 | hospitalizeal and oropharyngeal swabs |
| hCoV-19/Mexico/PUE_INER_IMSS_1281/2021 | EPI_ISL_2490558 | 04/05/21 | North America / Mexico / Puebla          | Human | 42 | Ambulatory and oropharyngeal swabs    |
| hCoV-19/Mexico/PUE_INER_IMSS_1283/2021 | EPI_ISL_2490559 | 04/05/21 | North America / Mexico / Puebla          | Human | 42 | Ambulatory and oropharyngeal swabs    |
| hCoV-19/Mexico/PUE_INER_IMSS_1285/2021 | EPI_ISL_2490560 | 04/05/21 | North America / Mexico / Puebla          | Human | 25 | Ambulatory and oropharyngeal swabs    |
| hCoV-19/Mexico/PUE_INER_IMSS_1287/2021 | EPI_ISL_2490561 | 05/05/21 | North America / Mexico / Puebla          | Human | 34 | Ambulatory and oropharyngeal swabs    |
| hCoV-19/Mexico/PUE_INER_IMSS_1288/2021 | EPI_ISL_2490562 | 07/05/21 | North America / Mexico / Puebla          | Human | 55 | Ambulatory and oropharyngeal swabs    |
| hCoV-19/Mexico/PUE_INER_IMSS_1291/2021 | EPI_ISL_2490563 | 05/05/21 | North America / Mexico / Puebla          | Human | 33 | hospitalizeal and oropharyngeal swabs |
| hCoV-19/Mexico/CMX_INER_IMSS_1294/2021 | EPI_ISL_2490564 | 09/05/21 | North America / Mexico / Mexico City     | Human | 48 | hospitalizeal and oropharyngeal swabs |
| hCoV-19/Mexico/CMX_INER_IMSS_1296/2021 | EPI_ISL_2490565 | 11/05/21 | North America / Mexico / Mexico City     | Human | 52 | Ambulatory and oropharyngeal swabs    |
| hCoV-19/Mexico/MEX_INER_IMSS_1297/2021 | EPI_ISL_2490566 | 06/05/21 | North America / Mexico / State of Mexico | Human | 57 | hospitalizeal and oropharyngeal swabs |
| hCoV-19/Mexico/VER_INER_IMSS_1300/2021 | EPI_ISL_2490568 | 07/05/21 | North America / Mexico / Veracruz        | Human | 28 | Ambulatory and oropharyngeal swabs    |
| hCoV-19/Mexico/MEX_INER_IMSS_1303/2021 | EPI_ISL_2490569 | 12/05/21 | North America / Mexico / State of Mexico | Human | 47 | hospitalizeal and oropharyngeal swabs |
| hCoV-19/Mexico/CMX_INER_IMSS_1305/2021 | EPI_ISL_2490570 | 11/05/21 | North America / Mexico / Mexico City     | Human | 25 | hospitalizeal and oropharyngeal swab  |
| hCoV-19/Mexico/PUE_INER_IMSS_1307/2021 | EPI_ISL_2490571 | 09/05/21 | North America / Mexico / Puebla          | Human | 48 | Ambulatory and oropharyngeal swabs    |
| hCoV-19/Mexico/PUE_INER_IMSS_1308/2021 | EPI_ISL_2490572 | 09/05/21 | North America / Mexico / Puebla          | Human | 74 | Ambulatory and oropharyngeal swabs    |
| hCoV-19/Mexico/VER_INER_IMSS_1311/2021 | EPI_ISL_2490573 | 11/05/21 | North America / Mexico / Veracruz        | Human | 78 | hospitalizeal and oropharyngeal swabs |
| hCoV-19/Mexico/VER_INER_IMSS_1313/2021 | EPI_ISL_2490574 | 11/05/21 | North America / Mexico / Veracruz        | Human | 33 | Ambulatory and oropharyngeal swabs    |

|                                             |                 |          |                                          |       |        |              |                               |                    |
|---------------------------------------------|-----------------|----------|------------------------------------------|-------|--------|--------------|-------------------------------|--------------------|
| hCoV-19/Mexico/VER_INER_IMSS_1314/2021      | EPI_ISL_2490575 | 11/05/21 | North America / Mexico / Veracruz        | Human | 30     | hospitalized | nasal and oropharyngeal swabs |                    |
| hCoV-19/Mexico/MEX_INER_IMSS_1315/2021      | EPI_ISL_2490576 | 12/05/21 | North America / Mexico / State of Mexico | Human | 32     | hospitalized | nasal and oropharyngeal swabs |                    |
| hCoV-19/Mexico/CMX_INER_IMSS_1317/2021      | EPI_ISL_2490577 | 12/05/21 | North America / Mexico / Mexico City     | Human | 67     | hospitalized | nasal and oropharyngeal swabs |                    |
| hCoV-19/Mexico/MEX_INER_IMSS_1319/2021      | EPI_ISL_2490578 | 12/05/21 | North America / Mexico / State of Mexico | Human | 58     | hospitalized | nasal and oropharyngeal swabs |                    |
| hCoV-19/Mexico/MEX_INER_IMSS_1320/2021      | EPI_ISL_2490579 | 12/05/21 | North America / Mexico / State of Mexico | Human | 57     | hospitalized | nasal and oropharyngeal swabs |                    |
| hCoV-19/Mexico/HID_INER_IMSS_1321/2021      | EPI_ISL_2490580 | 11/05/21 | North America / Mexico / Hidalgo         | Human | 49     | hospitalized | nasal and oropharyngeal swabs |                    |
| hCoV-19/Mexico/HID_INER_IMSS_1324/2021      | EPI_ISL_2490581 | 11/05/21 | North America / Mexico / Hidalgo         | Human | 36     | hospitalized | nasal and oropharyngeal swabs |                    |
| hCoV-19/Mexico/TLA_INER_IMSS_1325/2021      | EPI_ISL_2490582 | 13/05/21 | North America / Mexico / Tlaxcala        | Human | 50     | hospitalized | nasal and oropharyngeal swabs |                    |
| hCoV-19/Mexico/MOR_INER_IMSS_1327/2021      | EPI_ISL_2490583 | 05/05/21 | North America / Mexico / Morelos         | Human | 56     | hospitalized | nasal and oropharyngeal swabs |                    |
| hCoV-19/Mexico/HID_INER_IMSS_1328/2021      | EPI_ISL_2490584 | 14/05/21 | North America / Mexico / Hidalgo         | Human | 52     | hospitalized | nasal and oropharyngeal swabs |                    |
| hCoV-19/Mexico/CMX-INER-IBT-0221/2021       | EPI_ISL_2490586 | 09/05/21 | North America / Mexico / Mexico City     | Human | Male   | 68           | Hospitalized                  |                    |
| hCoV-19/Mexico/CMX-INER-IBT-0227/2021       | EPI_ISL_2490589 | 12/05/21 | North America / Mexico / Mexico City     | Human | Female | 66           | Hospitalized                  |                    |
| hCoV-19/Mexico/CMX-INER-IBT-0232/2021       | EPI_ISL_2490590 | 15/05/21 | North America / Mexico / Mexico City     | Human | Male   | 67           | Hospitalized                  |                    |
| hCoV-19/Mexico/CMX-INER-IBT-0214/2021       | EPI_ISL_2490592 | 13/04/21 | North America / Mexico / Mexico City     | Human | Female | 67           | Hospitalized                  |                    |
| hCoV-19/Mexico/CMX-INER-IBT-0215/2021       | EPI_ISL_2490593 | 02/05/21 | North America / Mexico / Mexico City     | Human | Female | 59           | Ambulatory                    |                    |
| hCoV-19/Mexico/CMX-INER-IBT-0216/2021       | EPI_ISL_2490594 | 05/05/21 | North America / Mexico / Mexico City     | Human | Male   | 52           | Hospitalized                  |                    |
| hCoV-19/Mexico/CMX-INER-IBT-0217/2021       | EPI_ISL_2490595 | 06/05/21 | North America / Mexico / Mexico City     | Human | Female | 54           | Hospitalized                  |                    |
| hCoV-19/Mexico/CMX-INER-IBT-0218/2021       | EPI_ISL_2490596 | 07/05/21 | North America / Mexico / Mexico City     | Human | Male   | 58           | Hospitalized                  |                    |
| hCoV-19/Mexico/CMX-INER-IBT-0220/2021       | EPI_ISL_2490597 | 07/05/21 | North America / Mexico / Mexico City     | Human | Male   | 55           | Hospitalized                  |                    |
| hCoV-19/Mexico/CMX-INER-IBT-0223/2021       | EPI_ISL_2490598 | 10/05/21 | North America / Mexico / Mexico City     | Human | Male   | 46           | Hospitalized                  |                    |
| hCoV-19/Mexico/CMX-INER-IBT-0224/2021       | EPI_ISL_2490599 | 10/05/21 | North America / Mexico / Mexico City     | Human | Male   | 52           | Hospitalized                  |                    |
| hCoV-19/Mexico/CMX-INER-IBT-0225/2021       | EPI_ISL_2490600 | 10/05/21 | North America / Mexico / Mexico City     | Human | Female | 82           | Hospitalized                  |                    |
| hCoV-19/Mexico/CMX-INER-IBT-0228/2021       | EPI_ISL_2490601 | 12/05/21 | North America / Mexico / Mexico City     | Human | Female | 61           | Hospitalized                  |                    |
| hCoV-19/Mexico/CMX-INER-IBT-0229/2021       | EPI_ISL_2490602 | 13/05/21 | North America / Mexico / Mexico City     | Human | Male   | 48           | Hospitalized                  |                    |
| hCoV-19/Mexico/CMX-INER-IBT-0231/2021       | EPI_ISL_2490603 | 14/05/21 | North America / Mexico / Mexico City     | Human | Female | 55           | Hospitalized                  |                    |
| hCoV-19/Mexico/CMX-INER-IBT-0233/2021       | EPI_ISL_2490604 | 15/05/21 | North America / Mexico / Mexico City     | Human | Male   | 54           | Deceased                      |                    |
| hCoV-19/Mexico/CMX-INER-IBT-0234/2021       | EPI_ISL_2490605 | 15/05/21 | North America / Mexico / Mexico City     | Human | Male   | 41           | Hospitalized                  |                    |
| hCoV-19/Mexico/CMX-INER-IBT-0235/2021       | EPI_ISL_2490606 | 15/05/21 | North America / Mexico / Mexico City     | Human | Female | 45           | Hospitalized                  |                    |
| hCoV-19/Mexico/CMX-INER-IBT-0237/2021       | EPI_ISL_2490607 | 17/05/21 | North America / Mexico / Mexico City     | Human | Male   | 59           | Hospitalized                  |                    |
| hCoV-19/Mexico/CMX-INER-IBT-0239/2021       | EPI_ISL_2490608 | 18/05/21 | North America / Mexico / Mexico City     | Human | Female | 68           | Hospitalized                  |                    |
| hCoV-19/Mexico/QUE-InDRE_FB15786_S2544/2021 | EPI_ISL_2492462 | 06/05/21 | North America / Mexico / Queretaro       | Human | Female | 27           | Released                      | Oropharyngeal swab |
| hCoV-19/Mexico/QUE-InDRE_FB15753_S2627/2021 | EPI_ISL_2495922 | 04/05/21 | North America / Mexico / Queretaro       | Human | Male   | 56           | Released                      | Oropharyngeal swab |
| hCoV-19/Mexico/QUE-InDRE_FB15811_S2654/2021 | EPI_ISL_2495923 | 14/05/21 | North America / Mexico / Queretaro       | Human | Female | 50           | Released                      | Oropharyngeal swab |
| hCoV-19/Mexico/AGU-InDRE_FB16010_S2656/2021 | EPI_ISL_2495924 | 03/05/21 | North America / Mexico / Aguascalientes  | Human | Male   | 29           | Hospitalized                  | Oropharyngeal swab |
| hCoV-19/Mexico/QUE-InDRE_FB15809_S2653/2021 | EPI_ISL_2495925 | 14/05/21 | North America / Mexico / Queretaro       | Human | Male   | 45           | Released                      | Oropharyngeal swab |
| hCoV-19/Mexico/QUE-InDRE_FB15673_S2625/2021 | EPI_ISL_2495926 | 28/04/21 | North America / Mexico / Queretaro       | Human | Male   | 43           | Released                      | Oropharyngeal swab |
| hCoV-19/Mexico/QUE-InDRE_FB15788_S2641/2021 | EPI_ISL_2495927 | 06/05/21 | North America / Mexico / Queretaro       | Human | Female | 51           | Released                      | Oropharyngeal swab |
| hCoV-19/Mexico/QUE-InDRE_FB15763_S2628/2021 | EPI_ISL_2495928 | 04/05/21 | North America / Mexico / Queretaro       | Human | Male   | 41           | Released                      | Oropharyngeal swab |
| hCoV-19/Mexico/PUE-InDRE_FB14776_S2699/2021 | EPI_ISL_2495929 | 02/05/21 | North America / Mexico / Puebla          | Human | Male   | 69           | Hospitalized                  | Oropharyngeal swab |
| hCoV-19/Mexico/JAL-InDRE_FB16042_S2659/2021 | EPI_ISL_2495930 | 17/05/21 | North America / Mexico / Jalisco         | Human | Female | 40           | Hospitalized                  | Oropharyngeal swab |
| hCoV-19/Mexico/QUE-InDRE_FB15588_S2621/2021 | EPI_ISL_2495931 | 23/04/21 | North America / Mexico / Queretaro       | Human | Male   | 48           | Released                      | Oropharyngeal swab |
| hCoV-19/Mexico/QUE-InDRE_FB15661_S2624/2021 | EPI_ISL_2495932 | 27/04/21 | North America / Mexico / Queretaro       | Human | Female | 47           | Released                      | Oropharyngeal swab |
| hCoV-19/Mexico/MOR-InDRE_FB14777_S2694/2021 | EPI_ISL_2495933 | 03/05/21 | North America / Mexico / Morelos         | Human | Male   | 83           | Hospitalized                  | Oropharyngeal swab |
| hCoV-19/Mexico/NLE-InDRE_FB16186_S2676/2021 | EPI_ISL_2495934 | 17/05/21 | North America / Mexico / Nuevo Leon      | Human | Male   | 17           | Released                      | Oropharyngeal swab |

|                                                            |          |                                       |       |        |    |              |                    |
|------------------------------------------------------------|----------|---------------------------------------|-------|--------|----|--------------|--------------------|
| 1CoV-19/Mexico/MOR-IndRE_FB14775_S2692/2021EPI_ISL_2495935 | 01/05/21 | North America / Mexico / Morelos      | Human | Male   | 56 | Hospitalized | Oropharyngeal swab |
| 1CoV-19/Mexico/MIC-IndRE_FB16002_S2706/2021EPI_ISL_2495936 | 04/05/21 | North America / Mexico / Michoacan    | Human | Female | 28 | Deceased     | Oropharyngeal swab |
| 1CoV-19/Mexico/QUE-IndRE_FB15543_S2620/2021EPI_ISL_2495937 | 21/04/21 | North America / Mexico / Queretaro    | Human | Male   | 58 | Released     | Oropharyngeal swab |
| 1CoV-19/Mexico/QUE-IndRE_FB15643_S2622/2021EPI_ISL_2495938 | 14/05/21 | North America / Mexico / Queretaro    | Human | Male   | 40 | Released     | Oropharyngeal swab |
| 1CoV-19/Mexico/QUE-IndRE_FB15644_S2623/2021EPI_ISL_2495939 | 14/05/21 | North America / Mexico / Queretaro    | Human | Female | 47 | Released     | Oropharyngeal swab |
| 1CoV-19/Mexico/QUE-IndRE_FB15749_S2626/2021EPI_ISL_2495940 | 04/05/21 | North America / Mexico / Queretaro    | Human | Female | 34 | Released     | Oropharyngeal swab |
| 1CoV-19/Mexico/QUE-IndRE_FB15764_S2629/2021EPI_ISL_2495941 | 04/05/21 | North America / Mexico / Queretaro    | Human | Male   | 41 | Released     | Oropharyngeal swab |
| 1CoV-19/Mexico/QUE-IndRE_FB15765_S2630/2021EPI_ISL_2495942 | 04/05/21 | North America / Mexico / Queretaro    | Human | Female | 21 | Released     | Oropharyngeal swab |
| 1CoV-19/Mexico/QUE-IndRE_FB15766_S2631/2021EPI_ISL_2495943 | 04/05/21 | North America / Mexico / Queretaro    | Human | Female | 32 | Released     | Oropharyngeal swab |
| 1CoV-19/Mexico/QUE-IndRE_FB15775_S2633/2021EPI_ISL_2495944 | 05/05/21 | North America / Mexico / Queretaro    | Human | Female | 31 | Released     | Oropharyngeal swab |
| 1CoV-19/Mexico/QUE-IndRE_FB15776_S2634/2021EPI_ISL_2495945 | 05/05/21 | North America / Mexico / Queretaro    | Human | Male   | 32 | Released     | Oropharyngeal swab |
| 1CoV-19/Mexico/QUE-IndRE_FB15778_S2635/2021EPI_ISL_2495946 | 05/05/21 | North America / Mexico / Queretaro    | Human | Female | 19 | Released     | Oropharyngeal swab |
| 1CoV-19/Mexico/QUE-IndRE_FB15779_S2636/2021EPI_ISL_2495947 | 05/05/21 | North America / Mexico / Queretaro    | Human | Male   | 38 | Released     | Oropharyngeal swab |
| 1CoV-19/Mexico/QUE-IndRE_FB15782_S2637/2021EPI_ISL_2495948 | 06/05/21 | North America / Mexico / Queretaro    | Human | Male   | 37 | Released     | Oropharyngeal swab |
| 1CoV-19/Mexico/QUE-IndRE_FB15783_S2638/2021EPI_ISL_2495949 | 06/05/21 | North America / Mexico / Queretaro    | Human | Female | 39 | Released     | Oropharyngeal swab |
| 1CoV-19/Mexico/QUE-IndRE_FB15785_S2639/2021EPI_ISL_2495950 | 06/05/21 | North America / Mexico / Queretaro    | Human | Male   | 60 | Released     | Oropharyngeal swab |
| 1CoV-19/Mexico/QUE-IndRE_FB15787_S2640/2021EPI_ISL_2495951 | 06/05/21 | North America / Mexico / Queretaro    | Human | Female | 22 | Released     | Oropharyngeal swab |
| 1CoV-19/Mexico/QUE-IndRE_FB15794_S2642/2021EPI_ISL_2495952 | 10/05/21 | North America / Mexico / Queretaro    | Human | Female | 37 | Released     | Oropharyngeal swab |
| 1CoV-19/Mexico/QUE-IndRE_FB15795_S2643/2021EPI_ISL_2495953 | 10/05/21 | North America / Mexico / Queretaro    | Human | Male   | 60 | Released     | Oropharyngeal swab |
| 1CoV-19/Mexico/QUE-IndRE_FB15796_S2644/2021EPI_ISL_2495954 | 11/05/21 | North America / Mexico / Queretaro    | Human | Male   | 52 | Deceased     | Oropharyngeal swab |
| 1CoV-19/Mexico/QUE-IndRE_FB15797_S2645/2021EPI_ISL_2495955 | 11/05/21 | North America / Mexico / Queretaro    | Human | Male   | 53 | Released     | Oropharyngeal swab |
| 1CoV-19/Mexico/QUE-IndRE_FB15799_S2646/2021EPI_ISL_2495956 | 11/05/21 | North America / Mexico / Queretaro    | Human | Male   | 32 | Released     | Oropharyngeal swab |
| 1CoV-19/Mexico/QUE-IndRE_FB15800_S2647/2021EPI_ISL_2495957 | 12/05/21 | North America / Mexico / Queretaro    | Human | Female | 27 | Released     | Oropharyngeal swab |
| 1CoV-19/Mexico/QUE-IndRE_FB15801_S2648/2021EPI_ISL_2495958 | 12/05/21 | North America / Mexico / Queretaro    | Human | Female | 50 | Released     | Oropharyngeal swab |
| 1CoV-19/Mexico/QUE-IndRE_FB15802_S2649/2021EPI_ISL_2495959 | 12/05/21 | North America / Mexico / Queretaro    | Human | Female | 55 | Released     | Oropharyngeal swab |
| 1CoV-19/Mexico/QUE-IndRE_FB15803_S2650/2021EPI_ISL_2495960 | 12/05/21 | North America / Mexico / Queretaro    | Human | Male   | 45 | Released     | Oropharyngeal swab |
| 1CoV-19/Mexico/QUE-IndRE_FB15804_S2651/2021EPI_ISL_2495961 | 13/05/21 | North America / Mexico / Queretaro    | Human | Male   | 36 | Released     | Oropharyngeal swab |
| 1CoV-19/Mexico/QUE-IndRE_FB15806_S2652/2021EPI_ISL_2495962 | 13/05/21 | North America / Mexico / Queretaro    | Human | Male   | 80 | Hospitalized | Oropharyngeal swab |
| 1CoV-19/Mexico/NLE-IndRE_FB14849_S2655/2021EPI_ISL_2495963 | 05/05/21 | North America / Mexico / Nuevo Leon   | Human | Male   | 55 | Released     | Oropharyngeal swab |
| 1CoV-19/Mexico/GUA-IndRE_FB14804_S2657/2021EPI_ISL_2495964 | 05/05/21 | North America / Mexico / Guanajuato   | Human | Male   | 43 | Released     | Oropharyngeal swab |
| 1CoV-19/Mexico/YUC-IndRE_FB15985_S2658/2021EPI_ISL_2495965 | 16/05/21 | North America / Mexico / Yucatan      | Human | Male   | 57 | Deceased     | Oropharyngeal swab |
| 1CoV-19/Mexico/ROO-IndRE_FB16058_S2660/2021EPI_ISL_2495966 | 15/05/21 | North America / Mexico / Quintana Roo | Human | Male   | 12 | Released     | Oropharyngeal swab |
| 1CoV-19/Mexico/QUE-IndRE_FB14957_S2661/2021EPI_ISL_2495967 | 11/05/21 | North America / Mexico / Queretaro    | Human | Male   | 52 | Deceased     | Oropharyngeal swab |
| 1CoV-19/Mexico/QUE-IndRE_FB14960_S2662/2021EPI_ISL_2495968 | 09/05/21 | North America / Mexico / Queretaro    | Human | Male   | 59 | Released     | Oropharyngeal swab |
| 1CoV-19/Mexico/QUE-IndRE_FB14964_S2663/2021EPI_ISL_2495969 | 04/05/21 | North America / Mexico / Queretaro    | Human | Male   | 38 | Released     | Oropharyngeal swab |
| 1CoV-19/Mexico/MIC-IndRE_FB14984_S2664/2021EPI_ISL_2495970 | 02/05/21 | North America / Mexico / Michoacan    | Human | Male   | 67 | Released     | Oropharyngeal swab |
| 1CoV-19/Mexico/ZAC-IndRE_FB16083_S2665/2021EPI_ISL_2495971 | 17/05/21 | North America / Mexico / Zacatecas    | Human | Female | 53 | Released     | Oropharyngeal swab |
| 1CoV-19/Mexico/ZAC-IndRE_FB16084_S2666/2021EPI_ISL_2495972 | 17/05/21 | North America / Mexico / Zacatecas    | Human | Male   | 54 | Released     | Oropharyngeal swab |
| 1CoV-19/Mexico/ZAC-IndRE_FB16085_S2667/2021EPI_ISL_2495973 | 17/05/21 | North America / Mexico / Zacatecas    | Human | Male   | 17 | Released     | Oropharyngeal swab |
| 1CoV-19/Mexico/ZAC-IndRE_FB16086_S2668/2021EPI_ISL_2495974 | 17/05/21 | North America / Mexico / Zacatecas    | Human | Female | 20 | Released     | Oropharyngeal swab |
| 1CoV-19/Mexico/ZAC-IndRE_FB16087_S2669/2021EPI_ISL_2495975 | 18/05/21 | North America / Mexico / Zacatecas    | Human | Female | 92 | Released     | Oropharyngeal swab |
| 1CoV-19/Mexico/HID-IndRE_FB16121_S2670/2021EPI_ISL_2495976 | 16/05/21 | North America / Mexico / Hidalgo      | Human | Female | 45 | Hospitalized | Oropharyngeal swab |
| 1CoV-19/Mexico/QUE-IndRE_FB16163_S2671/2021EPI_ISL_2495977 | 17/05/21 | North America / Mexico / Queretaro    | Human | Female | 21 | Released     | Oropharyngeal swab |
| 1CoV-19/Mexico/QUE-IndRE_FB16170_S2672/2021EPI_ISL_2495978 | 20/05/21 | North America / Mexico / Queretaro    | Human | Male   | 29 | Released     | Oropharyngeal swab |



|                                                            |          |                                      |       |        |    |              |                    |
|------------------------------------------------------------|----------|--------------------------------------|-------|--------|----|--------------|--------------------|
| 1CoV-19/Mexico/TAB-InDRE_FB16173_S2673/2021EPI_ISL_2495979 | 20/05/21 | North America / Mexico / Tabasco     | Human | Male   | 83 | Released     | Oropharyngeal swab |
| 1CoV-19/Mexico/NLE-InDRE_FB16176_S2674/2021EPI_ISL_2495980 | 17/05/21 | North America / Mexico / Nuevo Leon  | Human | Male   | 85 | Hospitalized | Oropharyngeal swab |
| 1CoV-19/Mexico/NLE-InDRE_FB16183_S2675/2021EPI_ISL_2495981 | 19/05/21 | North America / Mexico / Nuevo Leon  | Human | Male   | 58 | Hospitalized | Oropharyngeal swab |
| 1CoV-19/Mexico/GUA-InDRE_FB16202_S2677/2021EPI_ISL_2495982 | 14/05/21 | North America / Mexico / Guanajuato  | Human | Female | 53 | Released     | Oropharyngeal swab |
| 1CoV-19/Mexico/GUA-InDRE_FB16204_S2678/2021EPI_ISL_2495983 | 15/05/21 | North America / Mexico / Guanajuato  | Human | Female | 15 | Released     | Oropharyngeal swab |
| 1CoV-19/Mexico/GUA-InDRE_FB16205_S2679/2021EPI_ISL_2495984 | 15/05/21 | North America / Mexico / Guanajuato  | Human | Male   | 21 | Released     | Oropharyngeal swab |
| 1CoV-19/Mexico/GUA-InDRE_FB16206_S2680/2021EPI_ISL_2495985 | 17/05/21 | North America / Mexico / Guanajuato  | Human | Female | 50 | Released     | Oropharyngeal swab |
| 1CoV-19/Mexico/GUA-InDRE_FB16215_S2681/2021EPI_ISL_2495986 | 18/05/21 | North America / Mexico / Guanajuato  | Human | Male   | 51 | Released     | Oropharyngeal swab |
| 1CoV-19/Mexico/GUA-InDRE_FB16217_S2682/2021EPI_ISL_2495987 | 19/05/21 | North America / Mexico / Guanajuato  | Human | Male   | 60 | Hospitalized | Oropharyngeal swab |
| 1CoV-19/Mexico/GRO-InDRE_FB16218_S2683/2021EPI_ISL_2495988 | 20/05/21 | North America / Mexico / Guerrero    | Human | Male   | 26 | Released     | Oropharyngeal swab |
| 1CoV-19/Mexico/GUA-InDRE_FB16221_S2684/2021EPI_ISL_2495989 | 19/05/21 | North America / Mexico / Guanajuato  | Human | Female | 55 | Released     | Oropharyngeal swab |
| 1CoV-19/Mexico/GUA-InDRE_FB16224_S2685/2021EPI_ISL_2495990 | 19/05/21 | North America / Mexico / Guanajuato  | Human | Male   | 57 | Released     | Oropharyngeal swab |
| 1CoV-19/Mexico/GUA-InDRE_FB16225_S2686/2021EPI_ISL_2495991 | 19/05/21 | North America / Mexico / Guanajuato  | Human | Female | 22 | Released     | Oropharyngeal swab |
| 1CoV-19/Mexico/MOR-InDRE_FB16234_S2687/2021EPI_ISL_2495992 | 19/05/21 | North America / Mexico / Morelos     | Human | Female | 60 | Released     | Oropharyngeal swab |
| 1CoV-19/Mexico/CAM-InDRE_FB14549_S2688/2021EPI_ISL_2495993 | 01/05/21 | North America / Mexico / Campeche    | Human | Female | 55 | Released     | Oropharyngeal swab |
| 1CoV-19/Mexico/MOR-InDRE_FB14765_S2689/2021EPI_ISL_2495994 | 06/05/21 | North America / Mexico / Morelos     | Human | Female | 83 | Deceased     | Oropharyngeal swab |
| 1CoV-19/Mexico/MOR-InDRE_FB14771_S2690/2021EPI_ISL_2495995 | 02/05/21 | North America / Mexico / Morelos     | Human | Male   | 52 | Released     | Oropharyngeal swab |
| 1CoV-19/Mexico/MOR-InDRE_FB14773_S2691/2021EPI_ISL_2495996 | 02/05/21 | North America / Mexico / Morelos     | Human | Male   | 78 | Hospitalized | Oropharyngeal swab |
| 1CoV-19/Mexico/GUA-InDRE_FB14807_S2693/2021EPI_ISL_2495997 | 02/05/21 | North America / Mexico / Guanajuato  | Human | Female | 39 | Released     | Oropharyngeal swab |
| 1CoV-19/Mexico/NLE-InDRE_FB14851_S2695/2021EPI_ISL_2495998 | 04/05/21 | North America / Mexico / Nuevo Leon  | Human | Male   | 55 | Released     | Oropharyngeal swab |
| 1CoV-19/Mexico/GUA-InDRE_FB14794_S2696/2021EPI_ISL_2495999 | 07/05/21 | North America / Mexico / Guanajuato  | Human | Male   | 55 | Hospitalized | Oropharyngeal swab |
| 1CoV-19/Mexico/GUA-InDRE_FB14812_S2697/2021EPI_ISL_2496000 | 03/05/21 | North America / Mexico / Guanajuato  | Human | Female | 47 | Released     | Oropharyngeal swab |
| 1CoV-19/Mexico/PUE-InDRE_FB16506_S2698/2021EPI_ISL_2496001 | 30/04/21 | North America / Mexico / Puebla      | Human | Male   | 52 | Deceased     | Oropharyngeal swab |
| 1CoV-19/Mexico/GUA-InDRE_FB14808_S2700/2021EPI_ISL_2496002 | 03/05/21 | North America / Mexico / Guanajuato  | Human | Male   | 32 | Released     | Oropharyngeal swab |
| 1CoV-19/Mexico/CHH-InDRE_FB15892_S2701/2021EPI_ISL_2496003 | 11/05/21 | North America / Mexico / Chihuahua   | Human | Male   | 82 | Hospitalized | Oropharyngeal swab |
| 1CoV-19/Mexico/TAM-InDRE_FB15940_S2702/2021EPI_ISL_2496004 | 07/05/21 | North America / Mexico / Tamaulipas  | Human | Female | 32 | Released     | Oropharyngeal swab |
| 1CoV-19/Mexico/CAM-InDRE_FB15991_S2703/2021EPI_ISL_2496005 | 07/05/21 | North America / Mexico / Campeche    | Human | Male   | 77 | Deceased     | Oropharyngeal swab |
| hCoV-19/Mexico/MIC-InDRE_FB16000_S2704/2021EPI_ISL_2496006 | 03/05/21 | North America / Mexico / Michoacan   | Human | Male   | 73 | Deceased     | Oropharyngeal swab |
| hCoV-19/Mexico/MIC-InDRE_FB16001_S2705/2021EPI_ISL_2496007 | 03/05/21 | North America / Mexico / Michoacan   | Human | Male   | 62 | Released     | Oropharyngeal swab |
| hCoV-19/Mexico/MIC-InDRE_FB16003_S2707/2021EPI_ISL_2496008 | 09/05/21 | North America / Mexico / Michoacan   | Human | Female | 26 | Released     | Oropharyngeal swab |
| hCoV-19/Mexico/MIC-InDRE_FB16004_S2708/2021EPI_ISL_2496009 | 08/05/21 | North America / Mexico / Michoacan   | Human | Male   | 23 | Released     | Oropharyngeal swab |
| hCoV-19/Mexico/MIC-InDRE_FB16005_S2709/2021EPI_ISL_2496010 | 03/05/21 | North America / Mexico / Michoacan   | Human | Female | 59 | Deceased     | Oropharyngeal swab |
| hCoV-19/Mexico/MIC-InDRE_FB16006_S2710/2021EPI_ISL_2496011 | 04/05/21 | North America / Mexico / Michoacan   | Human | Male   | 24 | Released     | Oropharyngeal swab |
| hCoV-19/Mexico/MIC-InDRE_FB16008_S2711/2021EPI_ISL_2496012 | 14/05/21 | North America / Mexico / Michoacan   | Human | Female | 74 | Deceased     | Oropharyngeal swab |
| hCoV-19/Mexico/SIN-InDRE_FB16074_S2713/2021EPI_ISL_2496013 | 11/05/21 | North America / Mexico / Sinaloa     | Human | Male   | 53 | Released     | Oropharyngeal swab |
| hCoV-19/Mexico/SIN-InDRE_FB16079_S2714/2021EPI_ISL_2496014 | 13/05/21 | North America / Mexico / Sinaloa     | Human | Male   | 5  | Released     | Oropharyngeal swab |
| 1CoV-19/Mexico/CMX-InDRE_FB16100_S2715/2021EPI_ISL_2496015 | 10/05/21 | North America / Mexico / Mexico City | Human | Female | 72 | Released     | Oropharyngeal swab |
| 1CoV-19/Mexico/CMX-InDRE_FB16101_S2716/2021EPI_ISL_2496016 | 10/05/21 | North America / Mexico / Mexico City | Human | Female | 12 | Released     | Oropharyngeal swab |
| 1CoV-19/Mexico/CMX-InDRE_FB16106_S2717/2021EPI_ISL_2496017 | 11/05/21 | North America / Mexico / Mexico City | Human | Male   | 44 | Deceased     | Oropharyngeal swab |
| 1CoV-19/Mexico/CMX-InDRE_FB16108_S2719/2021EPI_ISL_2496018 | 12/05/21 | North America / Mexico / Mexico City | Human | Female | 23 | Released     | Oropharyngeal swab |
| 1CoV-19/Mexico/CMX-InDRE_FB16110_S2720/2021EPI_ISL_2496019 | 13/05/21 | North America / Mexico / Mexico City | Human | Male   | 51 | Hospitalized | Oropharyngeal swab |
| 1CoV-19/Mexico/QUE-InDRE_FB16150_S2721/2021EPI_ISL_2496020 | 18/05/21 | North America / Mexico / Queretaro   | Human | Male   | 62 | Released     | Oropharyngeal swab |
| 1CoV-19/Mexico/QUE-InDRE_FB16153_S2722/2021EPI_ISL_2496021 | 19/05/21 | North America / Mexico / Queretaro   | Human | Male   | 59 | Released     | Oropharyngeal swab |
| 1CoV-19/Mexico/QUE-InDRE_FB16158_S2723/2021EPI_ISL_2496022 | 19/05/21 | North America / Mexico / Queretaro   | Human | Female | 34 | Released     | Oropharyngeal swab |

|                                             |                 |          |                                          |       |        |    |              |                     |
|---------------------------------------------|-----------------|----------|------------------------------------------|-------|--------|----|--------------|---------------------|
| hCoV-19/Mexico/JAL-InDRE_FB16241_S2724/2021 | EPI_ISL_2496023 | 20/05/21 | North America / Mexico / Jalisco         | Human | Male   | 57 | Hospitalized | Oropharyngeal swab  |
| hCoV-19/Mexico/JAL-InDRE_FB16242_S2725/2021 | EPI_ISL_2496024 | 21/05/21 | North America / Mexico / Jalisco         | Human | Female | 57 | Hospitalized | Oropharyngeal swab  |
| hCoV-19/Mexico/ROO-InDRE_FB16362_S2726/2021 | EPI_ISL_2496025 | 17/05/21 | North America / Mexico / Quintana Roo    | Human | Female | 51 | Released     | Oropharyngeal swab  |
| hCoV-19/Mexico/QUE-InDRE_FB15767_S2632/2021 | EPI_ISL_2533822 | 04/05/21 | North America / Mexico / Queretaro       | Human | Male   | 59 | Released     | Oro-pharyngeal swab |
| hCoV-19/Mexico/SIN-InDRE_FB16071_S2712/2021 | EPI_ISL_2533823 | 14/05/21 | North America / Mexico / Sinaloa         | Human | Male   | 35 | Released     | Oro-pharyngeal swab |
| hCoV-19/Mexico/CMX-InDRE_FB16107_S2718/2021 | EPI_ISL_2533824 | 13/05/21 | North America / Mexico / Mexico City     | Human | Female | 55 | Released     | Oro-pharyngeal swab |
| hCoV-19/Mexico/SIN_CIAD-MZT_HJ1652/2021     | EPI_ISL_2533907 | 18/05/21 | North America / Mexico / Sinaloa         | Human | Male   | 29 | unknown      | Oro-pharyngeal swab |
| hCoV-19/Mexico/SIN_CIAD-MZT_S6782/2021      | EPI_ISL_2533908 | 13/05/21 | North America / Mexico / Sinaloa         | Human | Female | 59 | unknown      | Oro-pharyngeal swab |
| hCoV-19/Mexico/SIN_CIAD-MZT_S6917/2021      | EPI_ISL_2533909 | 27/05/21 | North America / Mexico / Sinaloa         | Human | Female | 23 | unknown      | Oro-pharyngeal swab |
| hCoV-19/Mexico/SIN_CIAD-MZT_S6922/2021      | EPI_ISL_2533910 | 28/05/21 | North America / Mexico / Sinaloa         | Human | Female | 55 | unknown      | Oro-pharyngeal swab |
| hCoV-19/Mexico/SIN_CIAD-MZT_S6928/2021      | EPI_ISL_2533911 | 29/05/21 | North America / Mexico / Sinaloa         | Human | Male   | 41 | unknown      | Oro-pharyngeal swab |
| hCoV-19/Mexico/SIN_CIAD-MZT_S6951/2021      | EPI_ISL_2533912 | 29/05/21 | North America / Mexico / Sinaloa         | Human | Male   | 52 | unknown      | Oro-pharyngeal swab |
| hCoV-19/Mexico/SON_CIAD-HMO_B2332/2021      | EPI_ISL_2533932 | 24/05/21 | North America / Mexico / Sonora          | Human | Female | 47 | recovered    | pharyngeal swab     |
| hCoV-19/Mexico/CHH-InDRE_FB14910_S2800/2021 | EPI_ISL_2545709 | 10/05/21 | North America / Mexico / Chihuahua       | Human | Male   | 77 | Released     | Oro-pharyngeal swab |
| hCoV-19/Mexico/VER-InDRE_FB14922_S2801/2021 | EPI_ISL_2545710 | 09/05/21 | North America / Mexico / Veracruz        | Human | Female | 59 | Released     | Oro-pharyngeal swab |
| hCoV-19/Mexico/VER-InDRE_FB14925_S2802/2021 | EPI_ISL_2545711 | 06/05/21 | North America / Mexico / Veracruz        | Human | Male   | 48 | Released     | Oro-pharyngeal swab |
| hCoV-19/Mexico/QUE-InDRE_FB15709_S2804/2021 | EPI_ISL_2545713 | 02/05/21 | North America / Mexico / Queretaro       | Human | Male   | 60 | Deceased     | Oro-pharyngeal swab |
| hCoV-19/Mexico/QUE-InDRE_FB15730_S2806/2021 | EPI_ISL_2545715 | 03/05/21 | North America / Mexico / Queretaro       | Human | Female | 49 | Released     | Oro-pharyngeal swab |
| hCoV-19/Mexico/QUE-InDRE_FB15732_S2807/2021 | EPI_ISL_2545716 | 03/05/21 | North America / Mexico / Queretaro       | Human | Male   | 30 | Released     | Oro-pharyngeal swab |
| hCoV-19/Mexico/QUE-InDRE_FB15734_S2808/2021 | EPI_ISL_2545717 | 03/05/21 | North America / Mexico / Queretaro       | Human | Male   | 32 | Released     | Oro-pharyngeal swab |
| hCoV-19/Mexico/QUE-InDRE_FB15736_S2809/2021 | EPI_ISL_2545718 | 03/05/21 | North America / Mexico / Queretaro       | Human | Male   | 31 | Released     | Oro-pharyngeal swab |
| hCoV-19/Mexico/QUE-InDRE_FB15737_S2810/2021 | EPI_ISL_2545719 | 03/05/21 | North America / Mexico / Queretaro       | Human | Female | 29 | Released     | Oro-pharyngeal swab |
| hCoV-19/Mexico/QUE-InDRE_FB15770_S2811/2021 | EPI_ISL_2545720 | 04/05/21 | North America / Mexico / Queretaro       | Human | Female | 36 | Hospitalized | Oro-pharyngeal swab |
| hCoV-19/Mexico/YUC-InDRE_FB16621_S2859/2021 | EPI_ISL_2545761 | 21/05/21 | North America / Mexico / Yucatan         | Human | Female | 56 | Released     | Oro-pharyngeal swab |
| hCoV-19/Mexico/YUC-InDRE_FB16636_S2868/2021 | EPI_ISL_2545770 | 21/05/21 | North America / Mexico / Yucatan         | Human | Female | 17 | Released     | Oro-pharyngeal swab |
| hCoV-19/Mexico/MIC-InDRE_FB16704_S2902/2021 | EPI_ISL_2545804 | 13/05/21 | North America / Mexico / Michoacan       | Human | Female | 69 | Released     | Oro-pharyngeal swab |
| hCoV-19/Mexico/DUR-InDRE_FB16735_S2904/2021 | EPI_ISL_2545805 | 26/05/21 | North America / Mexico / Durango         | Human | Male   | 49 | Hospitalized | Oro-pharyngeal swab |
| hCoV-19/Mexico/MEX-InDRE_FD71239_S2921/2021 | EPI_ISL_2545817 | 19/05/21 | North America / Mexico / State of Mexico | Human | Female | 29 | Released     | Oro-pharyngeal swab |
| hCoV-19/Mexico/MEX-INMEGEN-05-05-121/2021   | EPI_ISL_2550745 | 21/05/21 | North America / Mexico / State of Mexico | Human | Female | 58 | unknown      | Oropharyngeal swab  |
| hCoV-19/Mexico/MEX-INMEGEN-05-05-137/2021   | EPI_ISL_2550748 | 21/05/21 | North America / Mexico / State of Mexico | Human | Female | 35 | unknown      | Oropharyngeal swab  |
| hCoV-19/Mexico/CMX-INMEGEN-05-05-181/2021   | EPI_ISL_2550751 | 21/05/21 | North America / Mexico / Mexico City     | Human | Female | 56 | unknown      | Oropharyngeal swab  |
| hCoV-19/Mexico/HID-INMEGEN-05-05-250/2021   | EPI_ISL_2550757 | 20/05/21 | North America / Mexico / Hidalgo         | Human | Male   | 39 | unknown      | Oropharyngeal swab  |
| hCoV-19/Mexico/JAL-InDRE_FB14893_S2951/2021 | EPI_ISL_2559261 | 05/05/21 | North America / Mexico / Jalisco         | Human | Male   | 62 | Deceased     | Oro-pharyngeal swab |
| hCoV-19/Mexico/CHH-InDRE_FB14898_S2952/2021 | EPI_ISL_2559263 | 03/05/21 | North America / Mexico / Chihuahua       | Human | Male   | 49 | Deceased     | Oro-pharyngeal swab |
| hCoV-19/Mexico/CHH-InDRE_FB14900_S2953/2021 | EPI_ISL_2559265 | 03/05/21 | North America / Mexico / Chihuahua       | Human | Male   | 71 | Hospitalized | Oro-pharyngeal swab |
| hCoV-19/Mexico/CHH-InDRE_FB14902_S2954/2021 | EPI_ISL_2559267 | 03/05/21 | North America / Mexico / Chihuahua       | Human | Female | 74 | Hospitalized | Oro-pharyngeal swab |
| hCoV-19/Mexico/CHH-InDRE_FB14904_S2955/2021 | EPI_ISL_2559269 | 05/05/21 | North America / Mexico / Chihuahua       | Human | Female | 47 | Deceased     | Oro-pharyngeal swab |
| hCoV-19/Mexico/CHH-InDRE_FB14907_S2956/2021 | EPI_ISL_2559271 | 07/05/21 | North America / Mexico / Chihuahua       | Human | Male   | 19 | Released     | Oro-pharyngeal swab |
| hCoV-19/Mexico/CHH-InDRE_FB14911_S2957/2021 | EPI_ISL_2559273 | 10/05/21 | North America / Mexico / Chihuahua       | Human | Female | 37 | Released     | Oro-pharyngeal swab |
| hCoV-19/Mexico/CHH-InDRE_FB14912_S2958/2021 | EPI_ISL_2559275 | 08/05/21 | North America / Mexico / Chihuahua       | Human | Male   | 66 | Released     | Oro-pharyngeal swab |
| hCoV-19/Mexico/VER-InDRE_FB14926_S2959/2021 | EPI_ISL_2559277 | 08/05/21 | North America / Mexico / Veracruz        | Human | Female | 50 | Released     | Oro-pharyngeal swab |
| hCoV-19/Mexico/VER-InDRE_FB14934_S2960/2021 | EPI_ISL_2559279 | 30/04/21 | North America / Mexico / Veracruz        | Human | Male   | 59 | Deceased     | Oro-pharyngeal swab |
| hCoV-19/Mexico/TAM-InDRE_FB14942_S2961/2021 | EPI_ISL_2559281 | 30/04/21 | North America / Mexico / Tamaulipas      | Human | Female | 45 | Released     | Oro-pharyngeal swab |
| hCoV-19/Mexico/QUE-InDRE_FB15702_S2962/2021 | EPI_ISL_2559283 | 01/05/21 | North America / Mexico / Queretaro       | Human | Female | 50 | Hospitalized | Oro-pharyngeal swab |



|                                                            |          |                                          |       |        |    |              |                     |
|------------------------------------------------------------|----------|------------------------------------------|-------|--------|----|--------------|---------------------|
| 1CoV-19/Mexico/TAB-InDRE_FB16512_S3007/2021EPI_ISL_2559375 | 28/05/21 | North America / Mexico / Tabasco         | Human | Male   | 32 | Deceased     | Oro-pharyngeal swab |
| 1CoV-19/Mexico/TAB-InDRE_FB16515_S3008/2021EPI_ISL_2559377 | 29/05/21 | North America / Mexico / Tabasco         | Human | Male   | 92 | Released     | Oropharyngeal swab  |
| 1CoV-19/Mexico/VER-InDRE_FB16562_S3009/2021EPI_ISL_2559379 | 25/05/21 | North America / Mexico / Veracruz        | Human | Female | 59 | Deceased     | Oro-pharyngeal swab |
| 1CoV-19/Mexico/YUC-InDRE_FB16565_S3010/2021EPI_ISL_2559381 | 14/05/21 | North America / Mexico / Yucatan         | Human | Male   | 48 | Deceased     | Oro-pharyngeal swab |
| 1CoV-19/Mexico/YUC-InDRE_FB16567_S3011/2021EPI_ISL_2559384 | 16/05/21 | North America / Mexico / Yucatan         | Human | Male   | 57 | Deceased     | Oro-pharyngeal swab |
| 1CoV-19/Mexico/YUC-InDRE_FB16579_S3012/2021EPI_ISL_2559386 | 17/05/21 | North America / Mexico / Yucatan         | Human | Female | 41 | Released     | Oro-pharyngeal swab |
| 1CoV-19/Mexico/YUC-InDRE_FB16581_S3013/2021EPI_ISL_2559388 | 18/05/21 | North America / Mexico / Yucatan         | Human | Female | 20 | Released     | Oro-pharyngeal swab |
| 1CoV-19/Mexico/YUC-InDRE_FB16593_S3014/2021EPI_ISL_2559389 | 19/05/21 | North America / Mexico / Yucatan         | Human | Male   | 39 | Released     | Oro-pharyngeal swab |
| 1CoV-19/Mexico/YUC-InDRE_FB16594_S3015/2021EPI_ISL_2559391 | 19/05/21 | North America / Mexico / Yucatan         | Human | Female | 60 | Released     | Oro-pharyngeal swab |
| 1CoV-19/Mexico/YUC-InDRE_FB16595_S3016/2021EPI_ISL_2559393 | 19/05/21 | North America / Mexico / Yucatan         | Human | Male   | 68 | Released     | Oro-pharyngeal swab |
| 1CoV-19/Mexico/YUC-InDRE_FB16596_S3017/2021EPI_ISL_2559395 | 19/05/21 | North America / Mexico / Yucatan         | Human | Female | 38 | Released     | Oro-pharyngeal swab |
| 1CoV-19/Mexico/YUC-InDRE_FB16622_S3018/2021EPI_ISL_2559397 | 21/05/21 | North America / Mexico / Yucatan         | Human | Female | 40 | Released     | Oro-pharyngeal swab |
| 1CoV-19/Mexico/YUC-InDRE_FB16623_S3019/2021EPI_ISL_2559399 | 21/05/21 | North America / Mexico / Yucatan         | Human | Male   | 30 | Released     | Oro-pharyngeal swab |
| 1CoV-19/Mexico/YUC-InDRE_FB16628_S3020/2021EPI_ISL_2559402 | 20/05/21 | North America / Mexico / Yucatan         | Human | Female | 58 | Released     | Oro-pharyngeal swab |
| 1CoV-19/Mexico/YUC-InDRE_FB16629_S3021/2021EPI_ISL_2559404 | 20/05/21 | North America / Mexico / Yucatan         | Human | Male   | 38 | Released     | Oro-pharyngeal swab |
| 1CoV-19/Mexico/YUC-InDRE_FB16630_S3022/2021EPI_ISL_2559406 | 20/05/21 | North America / Mexico / Yucatan         | Human | Female | 30 | Released     | Oro-pharyngeal swab |
| 1CoV-19/Mexico/YUC-InDRE_FB16631_S3023/2021EPI_ISL_2559408 | 20/05/21 | North America / Mexico / Yucatan         | Human | Female | 21 | Released     | Oro-pharyngeal swab |
| 1CoV-19/Mexico/YUC-InDRE_FB16643_S3024/2021EPI_ISL_2559410 | 21/05/21 | North America / Mexico / Yucatan         | Human | Female | 28 | Released     | Oro-pharyngeal swab |
| 1CoV-19/Mexico/YUC-InDRE_FB16649_S3025/2021EPI_ISL_2559412 | 23/05/21 | North America / Mexico / Yucatan         | Human | Male   | 51 | Released     | Oro-pharyngeal swab |
| 1CoV-19/Mexico/YUC-InDRE_FB16654_S3026/2021EPI_ISL_2559414 | 23/05/21 | North America / Mexico / Yucatan         | Human | Female | 82 | Hospitalized | Oro-pharyngeal swab |
| 1CoV-19/Mexico/YUC-InDRE_FB16662_S3027/2021EPI_ISL_2559416 | 24/05/21 | North America / Mexico / Yucatan         | Human | Female | 73 | Released     | Oro-pharyngeal swab |
| 1CoV-19/Mexico/YUC-InDRE_FB16668_S3028/2021EPI_ISL_2559419 | 25/05/21 | North America / Mexico / Yucatan         | Human | Male   | 64 | Released     | Oro-pharyngeal swab |
| 1CoV-19/Mexico/YUC-InDRE_FB16675_S3029/2021EPI_ISL_2559421 | 25/05/21 | North America / Mexico / Yucatan         | Human | Male   | 27 | Released     | Oro-pharyngeal swab |
| 1CoV-19/Mexico/YUC-InDRE_FB16690_S3030/2021EPI_ISL_2559423 | 27/05/21 | North America / Mexico / Yucatan         | Human | Male   | 55 | Released     | Oro-pharyngeal swab |
| hCoV-19/Mexico/MIC-InDRE_FB16692_S3031/2021EPI_ISL_2559425 | 23/05/21 | North America / Mexico / Michoacan       | Human | Male   | 88 | Deceased     | Oro-pharyngeal swab |
| hCoV-19/Mexico/MIC-InDRE_FB16693_S3032/2021EPI_ISL_2559427 | 15/05/21 | North America / Mexico / Michoacan       | Human | Female | 64 | Released     | Oro-pharyngeal swab |
| hCoV-19/Mexico/MIC-InDRE_FB16694_S3033/2021EPI_ISL_2559429 | 17/05/21 | North America / Mexico / Michoacan       | Human | Male   | 46 | Released     | Oro-pharyngeal swab |
| hCoV-19/Mexico/MIC-InDRE_FB16695_S3034/2021EPI_ISL_2559431 | 03/05/21 | North America / Mexico / Michoacan       | Human | Male   | 42 | Hospitalized | Oro-pharyngeal swab |
| hCoV-19/Mexico/MIC-InDRE_FB16696_S3035/2021EPI_ISL_2559433 | 05/05/21 | North America / Mexico / Michoacan       | Human | Female | 54 | Hospitalized | Oro-pharyngeal swab |
| hCoV-19/Mexico/MIC-InDRE_FB16697_S3036/2021EPI_ISL_2559435 | 06/05/21 | North America / Mexico / Michoacan       | Human | Female | 78 | Deceased     | Oro-pharyngeal swab |
| hCoV-19/Mexico/MIC-InDRE_FB16698_S3037/2021EPI_ISL_2559437 | 20/05/21 | North America / Mexico / Michoacan       | Human | Male   | 54 | Hospitalized | Oro-pharyngeal swab |
| hCoV-19/Mexico/MIC-InDRE_FB16699_S3038/2021EPI_ISL_2559439 | 20/05/21 | North America / Mexico / Michoacan       | Human | Female | 57 | Released     | Oro-pharyngeal swab |
| hCoV-19/Mexico/MIC-InDRE_FB16701_S3039/2021EPI_ISL_2559442 | 12/05/21 | North America / Mexico / Michoacan       | Human | Male   | 43 | Released     | Oro-pharyngeal swab |
| hCoV-19/Mexico/MIC-InDRE_FB16702_S3040/2021EPI_ISL_2559444 | 11/05/21 | North America / Mexico / Michoacan       | Human | Female | 50 | Released     | Oro-pharyngeal swab |
| hCoV-19/Mexico/MIC-InDRE_FB16703_S3041/2021EPI_ISL_2559446 | 14/05/21 | North America / Mexico / Michoacan       | Human | Female | 58 | unknown      | Oro-pharyngeal swab |
| 1CoV-19/Mexico/DUR-InDRE_FB16736_S3042/2021EPI_ISL_2559448 | 21/05/21 | North America / Mexico / Durango         | Human | Male   | 78 | Hospitalized | Oro-pharyngeal swab |
| hCoV-19/Mexico/SIN-InDRE_FB16741_S3043/2021EPI_ISL_2559450 | 26/05/21 | North America / Mexico / Sinaloa         | Human | Female | 67 | Hospitalized | Oro-pharyngeal swab |
| 1CoV-19/Mexico/COL-InDRE_FB16787_S3044/2021EPI_ISL_2559452 | 25/05/21 | North America / Mexico / Colima          | Human | Female | 43 | Released     | Oro-pharyngeal swab |
| 1CoV-19/Mexico/SLP-InDRE_FB16811_S3045/2021EPI_ISL_2559454 | 08/05/21 | North America / Mexico / San Luis Potosi | Human | Male   | 53 | Released     | Oro-pharyngeal swab |
| 1CoV-19/Mexico/CMX-InDRE_FD69778_S3046/2021EPI_ISL_2559456 | 18/05/21 | North America / Mexico / Mexico City     | Human | Male   | 50 | Released     | Oro-pharyngeal swab |
| 1CoV-19/Mexico/CMX-InDRE_FD69921_S3047/2021EPI_ISL_2559458 | 18/05/21 | North America / Mexico / Mexico City     | Human | Male   | 33 | Released     | Oro-pharyngeal swab |
| 1CoV-19/Mexico/MEX-InDRE_FD70499_S3048/2021EPI_ISL_2559460 | 18/05/21 | North America / Mexico / State of Mexico | Human | Male   | 13 | Released     | Oro-pharyngeal swab |
| 1CoV-19/Mexico/CMX-InDRE_FD71232_S3049/2021EPI_ISL_2559463 | 19/05/21 | North America / Mexico / Mexico City     | Human | Female | 29 | Released     | Oro-pharyngeal swab |
| 1CoV-19/Mexico/CMX-InDRE_FD71249_S3050/2021EPI_ISL_2559465 | 19/05/21 | North America / Mexico / Mexico City     | Human | Male   | 53 | Released     | Oro-pharyngeal swab |

|                                                            |          |                                          |       |         |         |              |                     |
|------------------------------------------------------------|----------|------------------------------------------|-------|---------|---------|--------------|---------------------|
| iCoV-19/Mexico/CMX-InDRE_FD71321_S3051/2021EPI_ISL_2559467 | 19/05/21 | North America / Mexico / Mexico City     | Human | Male    | 29      | Released     | Oro-pharyngeal swab |
| iCoV-19/Mexico/MEX-InDRE_FD71483_S3052/2021EPI_ISL_2559469 | 20/05/21 | North America / Mexico / State of Mexico | Human | Male    | 54      | Hospitalized | Oro-pharyngeal swab |
| iCoV-19/Mexico/CMX-InDRE_FD72054_S3053/2021EPI_ISL_2559471 | 21/05/21 | North America / Mexico / Mexico City     | Human | Male    | 44      | Released     | Oro-pharyngeal swab |
| iCoV-19/Mexico/CMX-InDRE_FD72088_S3054/2021EPI_ISL_2559472 | 20/05/21 | North America / Mexico / Mexico City     | Human | Male    | 52      | Released     | Oro-pharyngeal swab |
| iCoV-19/Mexico/CMX-InDRE_FD72094_S3055/2021EPI_ISL_2559473 | 20/05/21 | North America / Mexico / Mexico City     | Human | Female  | 82      | Released     | Oro-pharyngeal swab |
| iCoV-19/Mexico/CMX-InDRE_FD72324_S3056/2021EPI_ISL_2559475 | 21/05/21 | North America / Mexico / Mexico City     | Human | Female  | 22      | Released     | Oro-pharyngeal swab |
| iCoV-19/Mexico/CMX-InDRE_FD72354_S3057/2021EPI_ISL_2559477 | 22/05/21 | North America / Mexico / Mexico City     | Human | Female  | 34      | Released     | Oro-pharyngeal swab |
| iCoV-19/Mexico/CMX-InDRE_FD72395_S3058/2021EPI_ISL_2559479 | 21/05/21 | North America / Mexico / Mexico City     | Human | Male    | 25      | Released     | Oro-pharyngeal swab |
| hCoV-19/Mexico/BCN-NHRC-OID_843677/2021 EPI_ISL_2566355    | 09/05/21 | North America / Mexico / Baja California | Human | unknown | unknown | unknown      | Nasal swab          |
| hCoV-19/Mexico/CMX-INMEGEN-05-06-2/2021 EPI_ISL_2603595    | 21/05/21 | North America / Mexico / Mexico City     | Human | Male    | 89      | unknown      | Oropharyngeal swab  |
| hCoV-19/Mexico/CMX-INMEGEN-05-06-3/2021 EPI_ISL_2603596    | 21/05/21 | North America / Mexico / Mexico City     | Human | Female  | 84      | unknown      | Oropharyngeal swab  |
| hCoV-19/Mexico/CMX-INMEGEN-05-06-6/2021 EPI_ISL_2603598    | 24/05/21 | North America / Mexico / Mexico City     | Human | Female  | 55      | unknown      | Oropharyngeal swab  |
| hCoV-19/Mexico/CMX-INMEGEN-05-06-7/2021 EPI_ISL_2603599    | 24/05/21 | North America / Mexico / Mexico City     | Human | Female  | 47      | unknown      | Oropharyngeal swab  |
| hCoV-19/Mexico/CMX-INMEGEN-05-06-9/2021 EPI_ISL_2603601    | 24/05/21 | North America / Mexico / Mexico City     | Human | Female  | 15      | unknown      | Oropharyngeal swab  |
| hCoV-19/Mexico/CMX-INMEGEN-05-06-10/2021 EPI_ISL_2603602   | 24/05/21 | North America / Mexico / Mexico City     | Human | Female  | 60      | unknown      | Oropharyngeal swab  |
| hCoV-19/Mexico/CMX-INMEGEN-05-06-11/2021 EPI_ISL_2603603   | 25/05/21 | North America / Mexico / Mexico City     | Human | Male    | 25      | unknown      | Oropharyngeal swab  |
| hCoV-19/Mexico/CMX-INMEGEN-05-06-12/2021 EPI_ISL_2603604   | 24/05/21 | North America / Mexico / Mexico City     | Human | Female  | 30      | unknown      | Oropharyngeal swab  |
| hCoV-19/Mexico/CMX-INMEGEN-05-06-14/2021 EPI_ISL_2603605   | 24/05/21 | North America / Mexico / Mexico City     | Human | Female  | 55      | unknown      | Oropharyngeal swab  |
| hCoV-19/Mexico/CMX-INMEGEN-05-06-15/2021 EPI_ISL_2603606   | 24/05/21 | North America / Mexico / Mexico City     | Human | Male    | 38      | unknown      | Oropharyngeal swab  |
| hCoV-19/Mexico/CMX-INMEGEN-05-06-16/2021 EPI_ISL_2603607   | 21/05/21 | North America / Mexico / Mexico City     | Human | Male    | 53      | unknown      | Oropharyngeal swab  |
| hCoV-19/Mexico/CMX-INMEGEN-05-06-17/2021 EPI_ISL_2603608   | 21/05/21 | North America / Mexico / Mexico City     | Human | Female  | 44      | unknown      | Oropharyngeal swab  |
| hCoV-19/Mexico/CMX-INMEGEN-05-06-26/2021 EPI_ISL_2603613   | 25/05/21 | North America / Mexico / Mexico City     | Human | Male    | 60      | unknown      | Oropharyngeal swab  |
| hCoV-19/Mexico/CMX-INMEGEN-05-06-27/2021 EPI_ISL_2603614   | 25/05/21 | North America / Mexico / Mexico City     | Human | Female  | 56      | unknown      | Oropharyngeal swab  |
| hCoV-19/Mexico/CMX-INMEGEN-05-06-29/2021 EPI_ISL_2603616   | 26/05/21 | North America / Mexico / Mexico City     | Human | Female  | 29      | unknown      | Oropharyngeal swab  |
| hCoV-19/Mexico/CMX-INMEGEN-05-06-30/2021 EPI_ISL_2603617   | 26/05/21 | North America / Mexico / Mexico City     | Human | Female  | 60      | unknown      | Oropharyngeal swab  |
| hCoV-19/Mexico/CMX-INMEGEN-05-06-32/2021 EPI_ISL_2603619   | 25/05/21 | North America / Mexico / Mexico City     | Human | Female  | 46      | unknown      | Oropharyngeal swab  |
| hCoV-19/Mexico/CMX-INMEGEN-05-06-34/2021 EPI_ISL_2603621   | 26/05/21 | North America / Mexico / Mexico City     | Human | Male    | 42      | unknown      | Oropharyngeal swab  |
| hCoV-19/Mexico/CMX-INMEGEN-05-06-41/2021 EPI_ISL_2603626   | 27/05/21 | North America / Mexico / Mexico City     | Human | Male    | 37      | unknown      | Oropharyngeal swab  |
| hCoV-19/Mexico/CMX-INMEGEN-05-06-42/2021 EPI_ISL_2603627   | 27/05/21 | North America / Mexico / Mexico City     | Human | Female  | 35      | unknown      | Oropharyngeal swab  |
| hCoV-19/Mexico/CMX-INMEGEN-05-06-46/2021 EPI_ISL_2603629   | 27/05/21 | North America / Mexico / Mexico City     | Human | Female  | 44      | unknown      | Oropharyngeal swab  |
| hCoV-19/Mexico/CMX-INMEGEN-05-06-51/2021 EPI_ISL_2603632   | 27/05/21 | North America / Mexico / Mexico City     | Human | Female  | 24      | unknown      | Oropharyngeal swab  |
| hCoV-19/Mexico/CMX-INMEGEN-05-06-62/2021 EPI_ISL_2603637   | 27/05/21 | North America / Mexico / Mexico City     | Human | Female  | 51      | unknown      | Oropharyngeal swab  |
| hCoV-19/Mexico/CMX-INMEGEN-05-06-64/2021 EPI_ISL_2603639   | 27/05/21 | North America / Mexico / Mexico City     | Human | Female  | 20      | unknown      | Oropharyngeal swab  |
| hCoV-19/Mexico/CMX-INMEGEN-05-06-65/2021 EPI_ISL_2603640   | 27/05/21 | North America / Mexico / Mexico City     | Human | Female  | 50      | unknown      | Oropharyngeal swab  |
| hCoV-19/Mexico/CMX-INMEGEN-05-06-67/2021 EPI_ISL_2603642   | 27/05/21 | North America / Mexico / Mexico City     | Human | Male    | 24      | unknown      | Oropharyngeal swab  |
| hCoV-19/Mexico/CMX-INMEGEN-05-06-68/2021 EPI_ISL_2603643   | 27/05/21 | North America / Mexico / Mexico City     | Human | Male    | 14      | unknown      | Oropharyngeal swab  |
| hCoV-19/Mexico/CMX-INMEGEN-05-06-70/2021 EPI_ISL_2603644   | 27/05/21 | North America / Mexico / Mexico City     | Human | Female  | 41      | unknown      | Oropharyngeal swab  |
| hCoV-19/Mexico/CMX-INMEGEN-05-06-74/2021 EPI_ISL_2603648   | 27/05/21 | North America / Mexico / Mexico City     | Human | Male    | 15      | unknown      | Oropharyngeal swab  |
| hCoV-19/Mexico/CMX-INMEGEN-05-06-85/2021 EPI_ISL_2603656   | 28/05/21 | North America / Mexico / Mexico City     | Human | Male    | 49      | unknown      | Oropharyngeal swab  |
| hCoV-19/Mexico/CMX-INMEGEN-05-06-91/2021 EPI_ISL_2603657   | 31/05/21 | North America / Mexico / Mexico City     | Human | Male    | 23      | unknown      | Oropharyngeal swab  |
| hCoV-19/Mexico/CMX-INMEGEN-05-06-175/2021 EPI_ISL_2603668  | 18/05/21 | North America / Mexico / Mexico City     | Human | Female  | 56      | unknown      | Oropharyngeal swab  |
| hCoV-19/Mexico/MEX-INMEGEN-05-06-177/2021 EPI_ISL_2603670  | 17/05/21 | North America / Mexico / State of Mexico | Human | Female  | 50      | unknown      | Oropharyngeal swab  |
| hCoV-19/Mexico/CMX-INMEGEN-05-06-181/2021 EPI_ISL_2603672  | 25/05/21 | North America / Mexico / Mexico City     | Human | Female  | 59      | unknown      | Oropharyngeal swab  |
| hCoV-19/Mexico/TAM-INMEGEN-05-06-191/2021 EPI_ISL_2603680  | 01/06/21 | North America / Mexico / Tamaulipas      | Human | Female  | 32      | unknown      | Oropharyngeal swab  |

|                                           |                 |          |                                          |       |        |    |         |                    |
|-------------------------------------------|-----------------|----------|------------------------------------------|-------|--------|----|---------|--------------------|
| hCoV-19/Mexico/YUC-INMEGEN-05-06-192/2021 | EPI_ISL_2603681 | 01/06/21 | North America / Mexico / Yucatan         | Human | Female | 35 | unknown | Oropharyngeal swab |
| hCoV-19/Mexico/MEX-INMEGEN-05-06-208/2021 | EPI_ISL_2603697 | 28/05/21 | North America / Mexico / State of Mexico | Human | Female | 23 | unknown | Oropharyngeal swab |
| hCoV-19/Mexico/MEX-INMEGEN-05-06-219/2021 | EPI_ISL_2603705 | 28/05/21 | North America / Mexico / State of Mexico | Human | Male   | 56 | unknown | Oropharyngeal swab |
| hCoV-19/Mexico/MEX-INMEGEN-05-06-226/2021 | EPI_ISL_2603709 | 28/05/21 | North America / Mexico / State of Mexico | Human | Female | 62 | unknown | Oropharyngeal swab |
| hCoV-19/Mexico/CMX-INMEGEN-05-06-257/2021 | EPI_ISL_2603728 | 28/05/21 | North America / Mexico / Mexico City     | Human | Female | 37 | unknown | Oropharyngeal swab |
| hCoV-19/Mexico/MEX-INMEGEN-05-06-258/2021 | EPI_ISL_2603729 | 28/05/21 | North America / Mexico / State of Mexico | Human | Female | 52 | unknown | Oropharyngeal swab |
| hCoV-19/Mexico/MEX-INMEGEN-05-06-265/2021 | EPI_ISL_2603735 | 28/05/21 | North America / Mexico / State of Mexico | Human | Female | 37 | unknown | Oropharyngeal swab |
| hCoV-19/Mexico/CMX-INMEGEN-05-06-272/2021 | EPI_ISL_2603741 | 28/05/21 | North America / Mexico / Mexico City     | Human | Male   | 39 | unknown | Oropharyngeal swab |
| hCoV-19/Mexico/MEX-INMEGEN-05-06-274/2021 | EPI_ISL_2603743 | 28/05/21 | North America / Mexico / State of Mexico | Human | Male   | 28 | unknown | Oropharyngeal swab |
| hCoV-19/Mexico/YUC-INMEGEN-05-06-278/2021 | EPI_ISL_2603747 | 01/06/21 | North America / Mexico / Yucatan         | Human | Male   | 37 | unknown | Oropharyngeal swab |
| hCoV-19/Mexico/CMX-INMEGEN-05-06-283/2021 | EPI_ISL_2603751 | 28/05/21 | North America / Mexico / Mexico City     | Human | Female | 25 | unknown | Oropharyngeal swab |
| hCoV-19/Mexico/MEX-INMEGEN-05-06-285/2021 | EPI_ISL_2603753 | 28/05/21 | North America / Mexico / State of Mexico | Human | Male   | 28 | unknown | Oropharyngeal swab |
| hCoV-19/Mexico/HID-INMEGEN-05-06-292/2021 | EPI_ISL_2603756 | 28/05/21 | North America / Mexico / Hidalgo         | Human | Male   | 31 | unknown | Oropharyngeal swab |
| hCoV-19/Mexico/MEX-INMEGEN-05-06-295/2021 | EPI_ISL_2603759 | 29/05/21 | North America / Mexico / State of Mexico | Human | Male   | 47 | unknown | Oropharyngeal swab |
| hCoV-19/Mexico/MEX-INMEGEN-05-06-301/2021 | EPI_ISL_2603763 | 28/05/21 | North America / Mexico / State of Mexico | Human | Male   | 24 | unknown | Oropharyngeal swab |
| hCoV-19/Mexico/MEX-INMEGEN-05-06-302/2021 | EPI_ISL_2603764 | 29/05/21 | North America / Mexico / State of Mexico | Human | Female | 47 | unknown | Oropharyngeal swab |
| hCoV-19/Mexico/HID-INMEGEN-05-06-303/2021 | EPI_ISL_2603765 | 29/05/21 | North America / Mexico / Hidalgo         | Human | Male   | 37 | unknown | Oropharyngeal swab |
| hCoV-19/Mexico/MEX-INMEGEN-05-06-305/2021 | EPI_ISL_2603767 | 29/05/21 | North America / Mexico / State of Mexico | Human | Male   | 13 | unknown | Oropharyngeal swab |
| hCoV-19/Mexico/MEX-INMEGEN-05-06-311/2021 | EPI_ISL_2603773 | 29/05/21 | North America / Mexico / Mexico City     | Human | Female | 25 | unknown | Oropharyngeal swab |
| hCoV-19/Mexico/CMX-INMEGEN-05-06-318/2021 | EPI_ISL_2603777 | 29/05/21 | North America / Mexico / Mexico City     | Human | Male   | 20 | unknown | Oropharyngeal swab |
| hCoV-19/Mexico/CMX-INMEGEN-05-06-322/2021 | EPI_ISL_2603779 | 28/05/21 | North America / Mexico / Mexico City     | Human | Female | 27 | unknown | Oropharyngeal swab |
| hCoV-19/Mexico/MEX-INMEGEN-05-06-324/2021 | EPI_ISL_2603780 | 28/05/21 | North America / Mexico / State of Mexico | Human | Female | 38 | unknown | Oropharyngeal swab |
| hCoV-19/Mexico/MEX-INMEGEN-05-06-325/2021 | EPI_ISL_2603781 | 28/05/21 | North America / Mexico / State of Mexico | Human | Female | 28 | unknown | Oropharyngeal swab |
| hCoV-19/Mexico/MEX-INMEGEN-05-06-337/2021 | EPI_ISL_2603788 | 29/05/21 | North America / Mexico / State of Mexico | Human | Male   | 20 | unknown | Oropharyngeal swab |
| hCoV-19/Mexico/CMX-INMEGEN-05-06-338/2021 | EPI_ISL_2603789 | 28/05/21 | North America / Mexico / Mexico City     | Human | Male   | 47 | unknown | Oropharyngeal swab |
| hCoV-19/Mexico/MEX-INMEGEN-05-06-339/2021 | EPI_ISL_2603790 | 28/05/21 | North America / Mexico / State of Mexico | Human | Female | 39 | unknown | Oropharyngeal swab |
| hCoV-19/Mexico/MEX-INMEGEN-05-06-341/2021 | EPI_ISL_2603792 | 28/05/21 | North America / Mexico / State of Mexico | Human | Female | 53 | unknown | Oropharyngeal swab |
| hCoV-19/Mexico/MEX-INMEGEN-05-06-343/2021 | EPI_ISL_2603794 | 29/05/21 | North America / Mexico / State of Mexico | Human | Male   | 22 | unknown | Oropharyngeal swab |
| hCoV-19/Mexico/MEX-INMEGEN-05-06-349/2021 | EPI_ISL_2603799 | 28/05/21 | North America / Mexico / State of Mexico | Human | Male   | 58 | unknown | Oropharyngeal swab |
| hCoV-19/Mexico/MEX-INMEGEN-05-06-355/2021 | EPI_ISL_2603802 | 28/05/21 | North America / Mexico / State of Mexico | Human | Female | 27 | unknown | Oropharyngeal swab |
| hCoV-19/Mexico/HID-INMEGEN-05-06-366/2021 | EPI_ISL_2603810 | 29/05/21 | North America / Mexico / Hidalgo         | Human | Male   | 48 | unknown | Oropharyngeal swab |
| hCoV-19/Mexico/CMX-INMEGEN-05-06-367/2021 | EPI_ISL_2603811 | 29/05/21 | North America / Mexico / Mexico City     | Human | Male   | 38 | unknown | Oropharyngeal swab |
| hCoV-19/Mexico/CMX-INMEGEN-05-06-368/2021 | EPI_ISL_2603812 | 29/05/21 | North America / Mexico / Mexico City     | Human | Female | 29 | unknown | Oropharyngeal swab |
| hCoV-19/Mexico/CMX-INMEGEN-05-06-372/2021 | EPI_ISL_2603815 | 28/05/21 | North America / Mexico / Mexico City     | Human | Male   | 21 | unknown | Oropharyngeal swab |
| hCoV-19/Mexico/MEX-INMEGEN-06-01-17/2021  | EPI_ISL_2616796 | 29/05/21 | North America / Mexico / State of Mexico | Human | Female | 31 | unknown | Oropharyngeal swab |
| hCoV-19/Mexico/MEX-INMEGEN-06-01-12/2021  | EPI_ISL_2616801 | 31/05/21 | North America / Mexico / State of Mexico | Human | Male   | 29 | unknown | Oropharyngeal swab |
| hCoV-19/Mexico/VER-INMEGEN-06-01-360/2021 | EPI_ISL_2616803 | 05/06/21 | North America / Mexico / Veracruz        | Human | Male   | 46 | unknown | Oropharyngeal swab |
| hCoV-19/Mexico/HID-INMEGEN-06-01-68/2021  | EPI_ISL_2616815 | 31/05/21 | North America / Mexico / Hidalgo         | Human | Male   | 41 | unknown | Oropharyngeal swab |
| hCoV-19/Mexico/CMX-INMEGEN-06-01-28/2021  | EPI_ISL_2616821 | 31/05/21 | North America / Mexico / Mexico City     | Human | Male   | 55 | unknown | Oropharyngeal swab |
| hCoV-19/Mexico/CMX-INMEGEN-06-01-31/2021  | EPI_ISL_2616835 | 01/06/21 | North America / Mexico / Mexico City     | Human | Male   | 23 | unknown | Oropharyngeal swab |
| hCoV-19/Mexico/CMX-INMEGEN-06-01-11/2021  | EPI_ISL_2616836 | 31/05/21 | North America / Mexico / Mexico City     | Human | Male   | 32 | unknown | Oropharyngeal swab |
| hCoV-19/Mexico/MEX-INMEGEN-06-01-135/2021 | EPI_ISL_2616856 | 01/06/21 | North America / Mexico / State of Mexico | Human | Female | 30 | unknown | Oropharyngeal swab |
| hCoV-19/Mexico/CMX-INMEGEN-06-01-92/2021  | EPI_ISL_2616857 | 31/05/21 | North America / Mexico / Mexico City     | Human | Female | 44 | unknown | Oropharyngeal swab |
| hCoV-19/Mexico/CMX-INMEGEN-06-01-8/2021   | EPI_ISL_2616861 | 29/05/21 | North America / Mexico / Mexico City     | Human | Male   | 37 | unknown | Oropharyngeal swab |

|                                            |                 |          |                                                    |       |         |         |              |                                    |
|--------------------------------------------|-----------------|----------|----------------------------------------------------|-------|---------|---------|--------------|------------------------------------|
| hCoV-19/Mexico/MEX-INMEGEN-06-01-75/2021   | EPI_ISL_2616873 | 31/05/21 | North America / Mexico / State of Mexico           | Human | Female  | 38      | unknown      | Oropharyngeal swab                 |
| hCoV-19/Mexico/YUC-INMEGEN-06-01-199/2021  | EPI_ISL_2616880 | 02/06/21 | North America / Mexico / Yucatan                   | Human | Female  | 28      | unknown      | Oropharyngeal swab                 |
| hCoV-19/Mexico/CMX-INMEGEN-06-01-67/2021   | EPI_ISL_2616883 | 31/05/21 | North America / Mexico / State of Mexico           | Human | Female  | 33      | unknown      | Oropharyngeal swab                 |
| hCoV-19/Mexico/YUC-INMEGEN-06-01-375/2021  | EPI_ISL_2616886 | 04/06/21 | North America / Mexico / Yucatan                   | Human | Male    | 42      | unknown      | Oropharyngeal swab                 |
| hCoV-19/Mexico/CMX-INMEGEN-06-01-53/2021   | EPI_ISL_2616894 | 31/05/21 | North America / Mexico / Mexico City               | Human | Male    | 27      | unknown      | Oropharyngeal swab                 |
| hCoV-19/Mexico/TAB-INMEGEN-06-01-267/2021  | EPI_ISL_2616896 | 03/06/21 | North America / Mexico / Tabasco                   | Human | Male    | 18      | unknown      | Oropharyngeal swab                 |
| hCoV-19/Mexico/CMX-INMEGEN-06-01-91/2021   | EPI_ISL_2616897 | 31/05/21 | North America / Mexico / Mexico City               | Human | Female  | 25      | unknown      | Oropharyngeal swab                 |
| hCoV-19/Mexico/MEX-INMEGEN-06-01-150/2021  | EPI_ISL_2616901 | 01/06/21 | North America / Mexico / State of Mexico           | Human | Female  | 43      | unknown      | Oropharyngeal swab                 |
| hCoV-19/Mexico/TAB-INMEGEN-06-01-251/2021  | EPI_ISL_2616905 | 03/06/21 | North America / Mexico / Tabasco                   | Human | Female  | 23      | unknown      | Oropharyngeal swab                 |
| hCoV-19/Mexico/TAB-INMEGEN-06-01-235/2021  | EPI_ISL_2616908 | 03/06/21 | North America / Mexico / Tabasco                   | Human | Female  | 25      | unknown      | Oropharyngeal swab                 |
| hCoV-19/Mexico/TAB-INMEGEN-06-01-227/2021  | EPI_ISL_2616909 | 03/06/21 | North America / Mexico / Tabasco                   | Human | Male    | 37      | unknown      | Oropharyngeal swab                 |
| hCoV-19/Mexico/MEX-INMEGEN-06-01-159/2021  | EPI_ISL_2616912 | 01/06/21 | North America / Mexico / State of Mexico           | Human | Female  | 32      | unknown      | Oropharyngeal swab                 |
| hCoV-19/Mexico/MEX-INMEGEN-06-01-33/2021   | EPI_ISL_2616930 | 30/05/21 | North America / Mexico / State of Mexico           | Human | Male    | 26      | unknown      | Oropharyngeal swab                 |
| hCoV-19/Mexico/TAB-INMEGEN-06-01-332/2021  | EPI_ISL_2616941 | 04/06/21 | North America / Mexico / Tabasco                   | Human | Male    | 22      | unknown      | Oropharyngeal swab                 |
| hCoV-19/Mexico/MEX-INMEGEN-06-01-118/2021  | EPI_ISL_2616946 | 01/06/21 | North America / Mexico / State of Mexico           | Human | Male    | 54      | unknown      | Oropharyngeal swab                 |
| hCoV-19/Mexico/CMX-INMEGEN-06-01-90/2021   | EPI_ISL_2616948 | 30/05/21 | North America / Mexico / Mexico City               | Human | Male    | 47      | unknown      | Oropharyngeal swab                 |
| hCoV-19/Mexico/HID-INMEGEN-06-01-171/2021  | EPI_ISL_2616953 | 02/06/21 | North America / Mexico / Hidalgo                   | Human | Male    | 10      | unknown      | Oropharyngeal swab                 |
| hCoV-19/Mexico/TAM-INMEGEN-06-01-363/2021  | EPI_ISL_2616964 | 04/06/21 | North America / Mexico / Tamaulipas                | Human | Female  | 35      | unknown      | Oropharyngeal swab                 |
| hCoV-19/Mexico/TAM-INMEGEN-06-01-203/2021  | EPI_ISL_2616986 | 03/06/21 | North America / Mexico / Tamaulipas                | Human | Male    | 23      | unknown      | Oropharyngeal swab                 |
| hCoV-19/Mexico/CMX-INMEGEN-06-01-1/2021    | EPI_ISL_2617020 | 30/05/21 | North America / Mexico / Mexico City               | Human | Female  | 30      | unknown      | Oropharyngeal swab                 |
| hCoV-19/Mexico/CMX-INMEGEN-06-01-141/2021  | EPI_ISL_2617021 | 02/06/21 | North America / Mexico / Mexico City               | Human | Male    | 29      | unknown      | Oropharyngeal swab                 |
| hCoV-19/Mexico/MEX-INMEGEN-06-01-143/2021  | EPI_ISL_2617022 | 01/06/21 | North America / Mexico / State of Mexico           | Human | Male    | 43      | unknown      | Oropharyngeal swab                 |
| hCoV-19/Mexico/YUC-INMEGEN-06-01-231/2021  | EPI_ISL_2617023 | 02/06/21 | North America / Mexico / Yucatan                   | Human | Male    | 28      | unknown      | Oropharyngeal swab                 |
| hCoV-19/Mexico/YUC-INMEGEN-06-01-263/2021  | EPI_ISL_2617024 | 02/06/21 | North America / Mexico / Yucatan                   | Human | Male    | 49      | unknown      | Oropharyngeal swab                 |
| hCoV-19/Mexico/YUC-INMEGEN-06-01-306/2021  | EPI_ISL_2617025 | 03/06/21 | North America / Mexico / Yucatan                   | Human | Female  | 20      | unknown      | Oropharyngeal swab                 |
| hCoV-19/Mexico/SEARCH-102112/2021          | EPI_ISL_2628540 | 29/05/21 | North America / Mexico / Baja California / Tijuana | Human | unknown | unknown | unknown      | Nasal swab                         |
| hCoV-19/Mexico/HID-21-053-002-M16536/2021  | EPI_ISL_2644836 | 20/05/21 | North America / Mexico / Hidalgo                   | Human | Male    | 57      | Deceased     | Nasopharyngeal swab                |
| hCoV-19/Mexico/CMX-INER-INMEGEN-00223/2021 | EPI_ISL_2646124 | 18/05/21 | North America / Mexico / Mexico City               | Human | Female  | 7       | unknown      |                                    |
| hCoV-19/Mexico/CMX-INER-INMEGEN-00224/2021 | EPI_ISL_2646125 | 18/05/21 | North America / Mexico / Mexico City               | Human | Male    | 45      | unknown      |                                    |
| hCoV-19/Mexico/CMX-INER-INMEGEN-00225/2021 | EPI_ISL_2646126 | 18/05/21 | North America / Mexico / Mexico City               | Human | Female  | 21      | unknown      |                                    |
| hCoV-19/Mexico/CMX-INER-INMEGEN-00226/2021 | EPI_ISL_2646127 | 18/05/21 | North America / Mexico / Mexico City               | Human | Male    | 45      | unknown      |                                    |
| hCoV-19/Mexico/CMX-INER-INMEGEN-00228/2021 | EPI_ISL_2646129 | 19/05/21 | North America / Mexico / Mexico City               | Human | Female  | 40      | unknown      |                                    |
| hCoV-19/Mexico/CMX-INER-INMEGEN-00229/2021 | EPI_ISL_2646130 | 19/05/21 | North America / Mexico / Mexico City               | Human | Male    | 58      | unknown      |                                    |
| hCoV-19/Mexico/CMX-INER-INMEGEN-00231/2021 | EPI_ISL_2646132 | 24/05/21 | North America / Mexico / Mexico City               | Human | Female  | 32      | unknown      |                                    |
| hCoV-19/Mexico/CMX-INER-INMEGEN-00232/2021 | EPI_ISL_2646133 | 24/05/21 | North America / Mexico / Mexico City               | Human | Male    | 40      | unknown      |                                    |
| hCoV-19/Mexico/CMX-INER-INMEGEN-00233/2021 | EPI_ISL_2646134 | 26/05/21 | North America / Mexico / Mexico City               | Human | Female  | 59      | unknown      |                                    |
| hCoV-19/Mexico/CMX-INER-INMEGEN-00236/2021 | EPI_ISL_2646137 | 29/05/21 | North America / Mexico / Mexico City               | Human | Female  | 32      | unknown      |                                    |
| hCoV-19/Mexico/CMX-INER-IBT-0240/2021      | EPI_ISL_2648110 | 26/03/21 | North America / Mexico / Mexico City               | Human | Male    | 70      | Hospitalized |                                    |
| hCoV-19/Mexico/CMX-INER-IBT-0241/2021      | EPI_ISL_2648111 | 28/03/21 | North America / Mexico / Mexico City               | Human | Female  | 90      | Hospitalized |                                    |
| hCoV-19/Mexico/CMX-INER-IBT-0242/2021      | EPI_ISL_2648112 | 28/03/21 | North America / Mexico / Mexico City               | Human | Female  | 75      | Hospitalized |                                    |
| hCoV-19/Mexico/CMX-INER-IBT-0243/2021      | EPI_ISL_2648113 | 28/03/21 | North America / Mexico / Mexico City               | Human | Male    | 86      | Deceased     |                                    |
| hCoV-19/Mexico/CMX-INER-IBT-0246/2021      | EPI_ISL_2648115 | 30/05/21 | North America / Mexico / Mexico City               | Human | Female  | 58      | Hospitalized |                                    |
| hCoV-19/Mexico/BCS-LANGEBIO_IMSS_1081/2021 | EPI_ISL_2671485 | 18/05/21 | North America / Mexico / Baja California Sur       | Human | Female  | 32      | Ambulatory   | Nasopharyngeal and pharyngeal swab |
| hCoV-19/Mexico/BCS-LANGEBIO_IMSS_1082/2021 | EPI_ISL_2671486 | 18/05/21 | North America / Mexico / Baja California Sur       | Human | Male    | 50      | Ambulatory   | Nasopharyngeal and pharyngeal swab |

|                                                           |          |                                          |       |        |    |              |                                    |
|-----------------------------------------------------------|----------|------------------------------------------|-------|--------|----|--------------|------------------------------------|
| 1CoV-19/Mexico/CAM-LANGEBIO_IMSS_0892/2021EPI_ISL_2671493 | 15/05/21 | North America / Mexico / Campeche        | Human | Female | 32 | Ambulatory   | Nasopharyngeal and pharyngeal swab |
| 1CoV-19/Mexico/CAM-LANGEBIO_IMSS_0898/2021EPI_ISL_2671496 | 17/05/21 | North America / Mexico / Campeche        | Human | Male   | 58 | Hospitalized | Nasopharyngeal and pharyngeal swab |
| 1CoV-19/Mexico/CAM-LANGEBIO_IMSS_0899/2021EPI_ISL_2671497 | 17/05/21 | North America / Mexico / Campeche        | Human | Female | 55 | Ambulatory   | Nasopharyngeal and pharyngeal swab |
| 1CoV-19/Mexico/CAM-LANGEBIO_IMSS_0923/2021EPI_ISL_2671500 | 19/05/21 | North America / Mexico / Campeche        | Human | Female | 33 | Ambulatory   | Nasopharyngeal and pharyngeal swab |
| hCoV-19/Mexico/CHH-LANGEBIO_IMSS_0843/2021EPI_ISL_2671511 | 17/05/21 | North America / Mexico / Chihuahua       | Human | Male   | 54 | Hospitalized | Nasopharyngeal and pharyngeal swab |
| hCoV-19/Mexico/CHH-LANGEBIO_IMSS_0844/2021EPI_ISL_2671512 | 13/05/21 | North America / Mexico / Chihuahua       | Human | Female | 79 | Hospitalized | Nasopharyngeal and pharyngeal swab |
| hCoV-19/Mexico/CHH-LANGEBIO_IMSS_0845/2021EPI_ISL_2671513 | 13/05/21 | North America / Mexico / Chihuahua       | Human | Female | 68 | Hospitalized | Nasopharyngeal and pharyngeal swab |
| hCoV-19/Mexico/CHH-LANGEBIO_IMSS_0861/2021EPI_ISL_2671514 | 17/05/21 | North America / Mexico / Chihuahua       | Human | Male   | 53 | Hospitalized | Nasopharyngeal and pharyngeal swab |
| hCoV-19/Mexico/CHH-LANGEBIO_IMSS_0867/2021EPI_ISL_2671516 | 18/05/21 | North America / Mexico / Chihuahua       | Human | Female | 70 | Hospitalized | Nasopharyngeal and pharyngeal swab |
| hCoV-19/Mexico/CHH-LANGEBIO_IMSS_0869/2021EPI_ISL_2671518 | 20/05/21 | North America / Mexico / Chihuahua       | Human | Male   | 58 | Hospitalized | Nasopharyngeal and pharyngeal swab |
| hCoV-19/Mexico/CHH-LANGEBIO_IMSS_0877/2021EPI_ISL_2671520 | 20/05/21 | North America / Mexico / Chihuahua       | Human | Female | 62 | Hospitalized | Nasopharyngeal swab                |
| hCoV-19/Mexico/CHH-LANGEBIO_IMSS_0888/2021EPI_ISL_2671524 | 22/05/21 | North America / Mexico / Chihuahua       | Human | Male   | 50 | Hospitalized | Nasopharyngeal and pharyngeal swab |
| 1CoV-19/Mexico/CMX-LANGEBIO_IMSS_1050/2021EPI_ISL_2671527 | 17/05/21 | North America / Mexico / Mexico City     | Human | Female | 23 | Ambulatory   | Nasopharyngeal and pharyngeal swab |
| 1CoV-19/Mexico/CMX-LANGEBIO_IMSS_1053/2021EPI_ISL_2671528 | 17/05/21 | North America / Mexico / Mexico City     | Human | Male   | 37 | Ambulatory   | Nasopharyngeal and pharyngeal swab |
| 1CoV-19/Mexico/CMX-LANGEBIO_IMSS_1068/2021EPI_ISL_2671530 | 19/05/21 | North America / Mexico / Mexico City     | Human | Male   | 21 | Hospitalized | Nasopharyngeal and pharyngeal swab |
| 1CoV-19/Mexico/CMX-LANGEBIO_IMSS_1070/2021EPI_ISL_2671532 | 17/05/21 | North America / Mexico / Mexico City     | Human | Female | 64 | Hospitalized | Pharyngeal swab                    |
| 1CoV-19/Mexico/CMX-LANGEBIO_IMSS_1109/2021EPI_ISL_2671534 | 20/05/21 | North America / Mexico / Mexico City     | Human | Male   | 56 | Hospitalized | Nasopharyngeal and pharyngeal swab |
| 1CoV-19/Mexico/CMX-LANGEBIO_IMSS_1120/2021EPI_ISL_2671537 | 21/05/21 | North America / Mexico / Mexico City     | Human | Male   | 54 | Hospitalized | Pharyngeal swab                    |
| 1CoV-19/Mexico/CMX-LANGEBIO_IMSS_1143/2021EPI_ISL_2671541 | 23/05/21 | North America / Mexico / Mexico City     | Human | Male   | 35 | Hospitalized | Pharyngeal swab                    |
| 1CoV-19/Mexico/CMX-LANGEBIO_IMSS_1147/2021EPI_ISL_2671542 | 24/05/21 | North America / Mexico / Mexico City     | Human | Female | 45 | Ambulatory   | Nasopharyngeal and pharyngeal swab |
| hCoV-19/Mexico/COL-LANGEBIO_IMSS_1002/2021EPI_ISL_2671548 | 16/05/21 | North America / Mexico / Colima          | Human | Female | 48 | Hospitalized | Nasopharyngeal and pharyngeal swab |
| hCoV-19/Mexico/COL-LANGEBIO_IMSS_1006/2021EPI_ISL_2671549 | 18/05/21 | North America / Mexico / Colima          | Human | Female | 78 | Hospitalized | Nasopharyngeal and pharyngeal swab |
| hCoV-19/Mexico/COL-LANGEBIO_IMSS_1019/2021EPI_ISL_2671551 | 22/05/21 | North America / Mexico / Colima          | Human | Female | 56 | Hospitalized | Nasopharyngeal and pharyngeal swab |
| hCoV-19/Mexico/COL-LANGEBIO_IMSS_1020/2021EPI_ISL_2671552 | 22/05/21 | North America / Mexico / Colima          | Human | Male   | 51 | Hospitalized | Nasopharyngeal and pharyngeal swab |
| hCoV-19/Mexico/COL-LANGEBIO_IMSS_1043/2021EPI_ISL_2671555 | 28/05/21 | North America / Mexico / Colima          | Human | Female | 46 | Hospitalized | Nasopharyngeal and pharyngeal swab |
| 1CoV-19/Mexico/GRO-LANGEBIO_IMSS_1051/2021EPI_ISL_2671561 | 13/05/21 | North America / Mexico / Guerrero        | Human | Female | 60 | Ambulatory   | Nasopharyngeal and pharyngeal swab |
| 1CoV-19/Mexico/GRO-LANGEBIO_IMSS_1054/2021EPI_ISL_2671562 | 17/05/21 | North America / Mexico / Guerrero        | Human | Male   | 72 | Hospitalized | Nasopharyngeal swab                |
| 1CoV-19/Mexico/GUA-LANGEBIO_IMSS_1010/2021EPI_ISL_2671566 | 19/05/21 | North America / Mexico / Guanajuato      | Human | Male   | 46 | Ambulatory   | Nasopharyngeal and pharyngeal swab |
| hCoV-19/Mexico/JAL-LANGEBIO_IMSS_1025/2021EPI_ISL_2671578 | 25/05/21 | North America / Mexico / Jalisco         | Human | Male   | 36 | Ambulatory   | Nasopharyngeal and pharyngeal swab |
| hCoV-19/Mexico/JAL-LANGEBIO_IMSS_1026/2021EPI_ISL_2671579 | 25/05/21 | North America / Mexico / Jalisco         | Human | Female | 21 | Ambulatory   | Nasopharyngeal and pharyngeal swab |
| hCoV-19/Mexico/JAL-LANGEBIO_IMSS_1030/2021EPI_ISL_2671580 | 26/05/21 | North America / Mexico / Jalisco         | Human | Male   | 18 | Ambulatory   | Nasopharyngeal and pharyngeal swab |
| 1CoV-19/Mexico/MEX-LANGEBIO_IMSS_1047/2021EPI_ISL_2671587 | 17/05/21 | North America / Mexico / State of Mexico | Human | Female | 37 | Hospitalized | Nasopharyngeal and pharyngeal swab |
| 1CoV-19/Mexico/MEX-LANGEBIO_IMSS_1048/2021EPI_ISL_2671588 | 17/05/21 | North America / Mexico / State of Mexico | Human | Female | 31 | Hospitalized | Nasopharyngeal and pharyngeal swab |
| 1CoV-19/Mexico/MEX-LANGEBIO_IMSS_1062/2021EPI_ISL_2671589 | 17/05/21 | North America / Mexico / State of Mexico | Human | Male   | 22 | Ambulatory   | Nasopharyngeal and pharyngeal swab |
| 1CoV-19/Mexico/MEX-LANGEBIO_IMSS_1063/2021EPI_ISL_2671590 | 17/05/21 | North America / Mexico / State of Mexico | Human | Female | 38 | Ambulatory   | Nasopharyngeal and pharyngeal swab |
| 1CoV-19/Mexico/MEX-LANGEBIO_IMSS_1064/2021EPI_ISL_2671591 | 18/05/21 | North America / Mexico / State of Mexico | Human | Male   | 57 | Hospitalized | Nasopharyngeal and pharyngeal swab |
| 1CoV-19/Mexico/MEX-LANGEBIO_IMSS_1066/2021EPI_ISL_2671592 | 18/05/21 | North America / Mexico / State of Mexico | Human | Female | 33 | Ambulatory   | Pharyngeal swab                    |
| 1CoV-19/Mexico/MEX-LANGEBIO_IMSS_1071/2021EPI_ISL_2671593 | 18/05/21 | North America / Mexico / State of Mexico | Human | Male   | 57 | Hospitalized | Nasopharyngeal and pharyngeal swab |
| 1CoV-19/Mexico/MEX-LANGEBIO_IMSS_1088/2021EPI_ISL_2671595 | 18/05/21 | North America / Mexico / State of Mexico | Human | Female | 36 | Ambulatory   | Pharyngeal swab                    |
| 1CoV-19/Mexico/MEX-LANGEBIO_IMSS_1096/2021EPI_ISL_2671596 | 18/05/21 | North America / Mexico / State of Mexico | Human | Female | 48 | Hospitalized | Nasopharyngeal and pharyngeal swab |
| 1CoV-19/Mexico/MEX-LANGEBIO_IMSS_1099/2021EPI_ISL_2671597 | 18/05/21 | North America / Mexico / State of Mexico | Human | Male   | 63 | Hospitalized | Nasopharyngeal and pharyngeal swab |
| 1CoV-19/Mexico/MEX-LANGEBIO_IMSS_1110/2021EPI_ISL_2671598 | 19/05/21 | North America / Mexico / State of Mexico | Human | Male   | 73 | Hospitalized | Nasopharyngeal and pharyngeal swab |
| 1CoV-19/Mexico/MEX-LANGEBIO_IMSS_1112/2021EPI_ISL_2671599 | 19/05/21 | North America / Mexico / State of Mexico | Human | Male   | 57 | Hospitalized | Nasopharyngeal and pharyngeal swab |
| 1CoV-19/Mexico/MEX-LANGEBIO_IMSS_1113/2021EPI_ISL_2671600 | 19/05/21 | North America / Mexico / State of Mexico | Human | Female | 67 | Hospitalized | Nasopharyngeal and pharyngeal swab |



|                                                           |          |                                          |       |        |    |              |                                    |
|-----------------------------------------------------------|----------|------------------------------------------|-------|--------|----|--------------|------------------------------------|
| 1CoV-19/Mexico/MEX-LANGEBIO_IMSS_1115/2021EPI_ISL_2671602 | 19/05/21 | North America / Mexico / State of Mexico | Human | Male   | 53 | Hospitalized | Nasopharyngeal swab                |
| 1CoV-19/Mexico/MEX-LANGEBIO_IMSS_1118/2021EPI_ISL_2671603 | 20/05/21 | North America / Mexico / State of Mexico | Human | Male   | 51 | Hospitalized | Nasopharyngeal and pharyngeal swab |
| 1CoV-19/Mexico/MEX-LANGEBIO_IMSS_1119/2021EPI_ISL_2671604 | 20/05/21 | North America / Mexico / State of Mexico | Human | Male   | 30 | Ambulatory   | Nasopharyngeal and pharyngeal swab |
| 1CoV-19/Mexico/MEX-LANGEBIO_IMSS_1124/2021EPI_ISL_2671607 | 20/05/21 | North America / Mexico / State of Mexico | Human | Male   | 51 | Hospitalized | Pharyngeal swab                    |
| hCoV-19/Mexico/MIC-LANGEBIO_IMSS_1012/2021EPI_ISL_2671608 | 19/05/21 | North America / Mexico / Michoacan       | Human | Male   | 36 | Hospitalized | Nasopharyngeal and pharyngeal swab |
| hCoV-19/Mexico/MIC-LANGEBIO_IMSS_1018/2021EPI_ISL_2671609 | 23/05/21 | North America / Mexico / Michoacan       | Human | Female | 54 | Hospitalized | Nasopharyngeal and pharyngeal swab |
| hCoV-19/Mexico/MIC-LANGEBIO_IMSS_1028/2021EPI_ISL_2671610 | 21/05/21 | North America / Mexico / Michoacan       | Human | Female | 46 | Ambulatory   | Nasopharyngeal and pharyngeal swab |
| hCoV-19/Mexico/MIC-LANGEBIO_IMSS_1035/2021EPI_ISL_2671611 | 26/05/21 | North America / Mexico / Michoacan       | Human | Male   | 81 | Hospitalized | Nasopharyngeal and pharyngeal swab |
| hCoV-19/Mexico/MIC-LANGEBIO_IMSS_1040/2021EPI_ISL_2671612 | 26/05/21 | North America / Mexico / Michoacan       | Human | Male   | 64 | Hospitalized | Nasopharyngeal and pharyngeal swab |
| 1CoV-19/Mexico/MOR-LANGEBIO_IMSS_1079/2021EPI_ISL_2671613 | 17/05/21 | North America / Mexico / Morelos         | Human | Male   | 52 | Hospitalized | Nasopharyngeal and pharyngeal swab |
| 1CoV-19/Mexico/MOR-LANGEBIO_IMSS_1149/2021EPI_ISL_2671615 | 24/05/21 | North America / Mexico / Morelos         | Human | Male   | 43 | Ambulatory   | Nasopharyngeal and pharyngeal swab |
| hCoV-19/Mexico/NAY-LANGEBIO_IMSS_1014/2021EPI_ISL_2671616 | 21/05/21 | North America / Mexico / Nayarit         | Human | Female | 73 | Hospitalized | Nasopharyngeal and pharyngeal swab |
| hCoV-19/Mexico/NAY-LANGEBIO_IMSS_1027/2021EPI_ISL_2671617 | 24/05/21 | North America / Mexico / Nayarit         | Human | Female | 57 | Hospitalized | Nasopharyngeal and pharyngeal swab |
| hCoV-19/Mexico/NLE-LANGEBIO_IMSS_0820/2021EPI_ISL_2671621 | 17/05/21 | North America / Mexico / Nuevo Leon      | Human | Female | 51 | Ambulatory   | Nasopharyngeal swab                |
| hCoV-19/Mexico/NLE-LANGEBIO_IMSS_0821/2021EPI_ISL_2671622 | 17/05/21 | North America / Mexico / Nuevo Leon      | Human | Female | 63 | Ambulatory   | Nasopharyngeal swab                |
| hCoV-19/Mexico/NLE-LANGEBIO_IMSS_0822/2021EPI_ISL_2671623 | 18/05/21 | North America / Mexico / Nuevo Leon      | Human | Female | 79 | Hospitalized | Nasopharyngeal swab                |
| hCoV-19/Mexico/NLE-LANGEBIO_IMSS_0834/2021EPI_ISL_2671627 | 18/05/21 | North America / Mexico / Nuevo Leon      | Human | Male   | 78 | Deceased     | Nasopharyngeal swab                |
| hCoV-19/Mexico/NLE-LANGEBIO_IMSS_0839/2021EPI_ISL_2671628 | 18/05/21 | North America / Mexico / Nuevo Leon      | Human | Female | 16 | Hospitalized | Nasopharyngeal and pharyngeal swab |
| hCoV-19/Mexico/NLE-LANGEBIO_IMSS_0859/2021EPI_ISL_2671634 | 21/05/21 | North America / Mexico / Nuevo Leon      | Human | Male   | 67 | Hospitalized | Nasopharyngeal swab                |
| hCoV-19/Mexico/PUE-LANGEBIO_IMSS_1090/2021EPI_ISL_2671641 | 18/05/21 | North America / Mexico / Puebla          | Human | Male   | 55 | Hospitalized | Nasopharyngeal and pharyngeal swab |
| hCoV-19/Mexico/PUE-LANGEBIO_IMSS_1092/2021EPI_ISL_2671643 | 17/05/21 | North America / Mexico / Puebla          | Human | Male   | 40 | Ambulatory   | Nasopharyngeal swab                |
| hCoV-19/Mexico/PUE-LANGEBIO_IMSS_1095/2021EPI_ISL_2671646 | 17/05/21 | North America / Mexico / Puebla          | Human | Female | 50 | Ambulatory   | Nasopharyngeal swab                |
| hCoV-19/Mexico/PUE-LANGEBIO_IMSS_1130/2021EPI_ISL_2671647 | 19/05/21 | North America / Mexico / Puebla          | Human | Male   | 63 | Hospitalized | Nasopharyngeal and pharyngeal swab |
| hCoV-19/Mexico/PUE-LANGEBIO_IMSS_1131/2021EPI_ISL_2671648 | 20/05/21 | North America / Mexico / Puebla          | Human | Male   | 45 | Ambulatory   | Nasopharyngeal swab                |
| hCoV-19/Mexico/PUE-LANGEBIO_IMSS_1151/2021EPI_ISL_2671650 | 23/05/21 | North America / Mexico / Puebla          | Human | Female | 50 | Ambulatory   | Nasopharyngeal swab                |
| 1CoV-19/Mexico/ROO-LANGEBIO_IMSS_0906/2021EPI_ISL_2671659 | 17/05/21 | North America / Mexico / Quintana Roo    | Human | Female | 29 | Hospitalized | Nasopharyngeal and pharyngeal swab |
| 1CoV-19/Mexico/ROO-LANGEBIO_IMSS_0936/2021EPI_ISL_2671679 | 21/05/21 | North America / Mexico / Quintana Roo    | Human | Female | 35 | Ambulatory   | Nasopharyngeal and pharyngeal swab |
| 1CoV-19/Mexico/ROO-LANGEBIO_IMSS_0961/2021EPI_ISL_2671691 | 24/05/21 | North America / Mexico / Quintana Roo    | Human | Male   | 60 | Hospitalized | Nasopharyngeal and pharyngeal swab |
| hCoV-19/Mexico/SIN-LANGEBIO_IMSS_1005/2021EPI_ISL_2671698 | 18/05/21 | North America / Mexico / Sinaloa         | Human | Male   | 97 | Hospitalized | Nasopharyngeal and pharyngeal swab |
| hCoV-19/Mexico/SIN-LANGEBIO_IMSS_1017/2021EPI_ISL_2671699 | 22/05/21 | North America / Mexico / Sinaloa         | Human | Male   | 41 | Hospitalized | Nasopharyngeal and pharyngeal swab |
| hCoV-19/Mexico/SLP-LANGEBIO_IMSS_0994/2021EPI_ISL_2671702 | 17/05/21 | North America / Mexico / San Luis Potosi | Human | Male   | 54 | Hospitalized | Nasopharyngeal and pharyngeal swab |
| hCoV-19/Mexico/TAB-LANGEBIO_IMSS_0901/2021EPI_ISL_2671704 | 16/05/21 | North America / Mexico / Tabasco         | Human | Female | 25 | Ambulatory   | Nasopharyngeal and pharyngeal swab |
| hCoV-19/Mexico/TAB-LANGEBIO_IMSS_0924/2021EPI_ISL_2671706 | 19/05/21 | North America / Mexico / Tabasco         | Human | Female | 54 | Hospitalized | Nasopharyngeal and pharyngeal swab |
| hCoV-19/Mexico/TAB-LANGEBIO_IMSS_0929/2021EPI_ISL_2671708 | 20/05/21 | North America / Mexico / Tabasco         | Human | Male   | 55 | Ambulatory   | Nasopharyngeal and pharyngeal swab |
| hCoV-19/Mexico/TAB-LANGEBIO_IMSS_0941/2021EPI_ISL_2671709 | 21/05/21 | North America / Mexico / Tabasco         | Human | Male   | 27 | Hospitalized | Nasopharyngeal and pharyngeal swab |
| hCoV-19/Mexico/TAB-LANGEBIO_IMSS_0946/2021EPI_ISL_2671711 | 23/05/21 | North America / Mexico / Tabasco         | Human | Male   | 76 | Ambulatory   | Nasopharyngeal and pharyngeal swab |
| hCoV-19/Mexico/TAB-LANGEBIO_IMSS_0947/2021EPI_ISL_2671712 | 22/05/21 | North America / Mexico / Tabasco         | Human | Male   | 23 | Ambulatory   | Nasopharyngeal and pharyngeal swab |
| hCoV-19/Mexico/TAB-LANGEBIO_IMSS_0948/2021EPI_ISL_2671713 | 22/05/21 | North America / Mexico / Tabasco         | Human | Female | 32 | Ambulatory   | Nasopharyngeal and pharyngeal swab |
| hCoV-19/Mexico/TAB-LANGEBIO_IMSS_0949/2021EPI_ISL_2671714 | 22/05/21 | North America / Mexico / Tabasco         | Human | Male   | 47 | Ambulatory   | Nasopharyngeal and pharyngeal swab |
| hCoV-19/Mexico/TAM-LANGEBIO_IMSS_0883/2021EPI_ISL_2671721 | 26/05/21 | North America / Mexico / Tamaulipas      | Human | Male   | 70 | Ambulatory   | Nasopharyngeal and pharyngeal swab |
| hCoV-19/Mexico/TLA-LANGEBIO_IMSS_1148/2021EPI_ISL_2671724 | 23/05/21 | North America / Mexico / Tlaxcala        | Human | Male   | 24 | Hospitalized | Nasopharyngeal and pharyngeal swab |
| hCoV-19/Mexico/VER-LANGEBIO_IMSS_1056/2021EPI_ISL_2671725 | 17/05/21 | North America / Mexico / Veracruz        | Human | Male   | 34 | Hospitalized | Nasopharyngeal and pharyngeal swab |
| hCoV-19/Mexico/VER-LANGEBIO_IMSS_1057/2021EPI_ISL_2671726 | 17/05/21 | North America / Mexico / Veracruz        | Human | Female | 68 | Hospitalized | Nasopharyngeal and pharyngeal swab |
| hCoV-19/Mexico/VER-LANGEBIO_IMSS_1058/2021EPI_ISL_2671727 | 14/05/21 | North America / Mexico / Veracruz        | Human | Female | 79 | Hospitalized | Nasopharyngeal and pharyngeal swab |

|                                                           |          |                                              |       |        |    |              |                                         |
|-----------------------------------------------------------|----------|----------------------------------------------|-------|--------|----|--------------|-----------------------------------------|
| hCoV-19/Mexico/VER-LANGEBIO_IMSS_1061/2021EPI_ISL_2671730 | 11/05/21 | North America / Mexico / Veracruz            | Human | Male   | 31 | Ambulatory   | Nasopharyngeal and pharyngeal swab      |
| hCoV-19/Mexico/VER-LANGEBIO_IMSS_1073/2021EPI_ISL_2671731 | 14/05/21 | North America / Mexico / Veracruz            | Human | Female | 79 | Ambulatory   | Nasopharyngeal and pharyngeal swab      |
| hCoV-19/Mexico/VER-LANGEBIO_IMSS_1077/2021EPI_ISL_2671734 | 15/05/21 | North America / Mexico / Veracruz            | Human | Male   | 50 | Ambulatory   | Nasopharyngeal and pharyngeal swab      |
| hCoV-19/Mexico/VER-LANGEBIO_IMSS_1087/2021EPI_ISL_2671735 | 18/05/21 | North America / Mexico / Veracruz            | Human | Female | 42 | Hospitalized | Nasopharyngeal and pharyngeal swab      |
| hCoV-19/Mexico/VER-LANGEBIO_IMSS_1104/2021EPI_ISL_2671738 | 18/05/21 | North America / Mexico / Veracruz            | Human | Male   | 43 | Ambulatory   | Nasopharyngeal and pharyngeal swab      |
| hCoV-19/Mexico/VER-LANGEBIO_IMSS_1108/2021EPI_ISL_2671742 | 18/05/21 | North America / Mexico / Veracruz            | Human | Female | 24 | Ambulatory   | Nasopharyngeal and pharyngeal swab      |
| hCoV-19/Mexico/VER-LANGEBIO_IMSS_1133/2021EPI_ISL_2671743 | 20/05/21 | North America / Mexico / Veracruz            | Human | Female | 47 | Ambulatory   | Nasopharyngeal and pharyngeal swab      |
| hCoV-19/Mexico/YUC-LANGEBIO_IMSS_0954/2021EPI_ISL_2671752 | 25/05/21 | North America / Mexico / Yucatan             | Human | Male   | 16 | Ambulatory   | Nasopharyngeal and pharyngeal swab      |
| hCoV-19/Mexico/ZAC-LANGEBIO_IMSS_0976/2021EPI_ISL_2671759 | 17/05/21 | North America / Mexico / Zacatecas           | Human | Female | 37 | Ambulatory   | Nasopharyngeal and pharyngeal swab      |
| hCoV-19/Mexico/ZAC-LANGEBIO_IMSS_0978/2021EPI_ISL_2671761 | 18/05/21 | North America / Mexico / Zacatecas           | Human | Female | 48 | Ambulatory   | Nasopharyngeal and pharyngeal swab      |
| hCoV-19/Mexico/ZAC-LANGEBIO_IMSS_0979/2021EPI_ISL_2671762 | 18/05/21 | North America / Mexico / Zacatecas           | Human | Female | 46 | Ambulatory   | Nasopharyngeal and pharyngeal swab      |
| hCoV-19/Mexico/ZAC-LANGEBIO_IMSS_0980/2021EPI_ISL_2671763 | 18/05/21 | North America / Mexico / Zacatecas           | Human | Male   | 49 | Ambulatory   | Nasopharyngeal and pharyngeal swab      |
| hCoV-19/Mexico/ZAC-LANGEBIO_IMSS_0981/2021EPI_ISL_2671764 | 18/05/21 | North America / Mexico / Zacatecas           | Human | Male   | 53 | Ambulatory   | Nasopharyngeal and pharyngeal swab      |
| hCoV-19/Mexico/ZAC-LANGEBIO_IMSS_0982/2021EPI_ISL_2671765 | 18/05/21 | North America / Mexico / Zacatecas           | Human | Male   | 36 | Ambulatory   | Nasopharyngeal and pharyngeal swab      |
| hCoV-19/Mexico/ZAC-LANGEBIO_IMSS_0983/2021EPI_ISL_2671766 | 18/05/21 | North America / Mexico / Zacatecas           | Human | Female | 51 | Ambulatory   | Nasopharyngeal and pharyngeal swab      |
| hCoV-19/Mexico/ZAC-LANGEBIO_IMSS_0984/2021EPI_ISL_2671767 | 18/05/21 | North America / Mexico / Zacatecas           | Human | Female | 17 | Ambulatory   | Nasopharyngeal and pharyngeal swab      |
| hCoV-19/Mexico/ZAC-LANGEBIO_IMSS_0985/2021EPI_ISL_2671768 | 18/05/21 | North America / Mexico / Zacatecas           | Human | Female | 22 | Ambulatory   | Nasopharyngeal and pharyngeal swab      |
| hCoV-19/Mexico/ZAC-LANGEBIO_IMSS_0990/2021EPI_ISL_2671770 | 19/05/21 | North America / Mexico / Zacatecas           | Human | Male   | 32 | Ambulatory   | Nasopharyngeal and pharyngeal swab      |
| hCoV-19/Mexico/ZAC-LANGEBIO_IMSS_0991/2021EPI_ISL_2671771 | 19/05/21 | North America / Mexico / Zacatecas           | Human | Male   | 57 | Ambulatory   | Nasopharyngeal and pharyngeal swab      |
| hCoV-19/Mexico/ZAC-LANGEBIO_IMSS_0992/2021EPI_ISL_2671772 | 19/05/21 | North America / Mexico / Zacatecas           | Human | Male   | 31 | Ambulatory   | Nasopharyngeal and pharyngeal swab      |
| hCoV-19/Mexico/ZAC-LANGEBIO_IMSS_0996/2021EPI_ISL_2671773 | 20/05/21 | North America / Mexico / Zacatecas           | Human | Female | 35 | Ambulatory   | Nasopharyngeal and pharyngeal swab      |
| hCoV-19/Mexico/ZAC-LANGEBIO_IMSS_0997/2021EPI_ISL_2671774 | 20/05/21 | North America / Mexico / Zacatecas           | Human | Female | 28 | Ambulatory   | Nasopharyngeal and pharyngeal swab      |
| hCoV-19/Mexico/ZAC-LANGEBIO_IMSS_0998/2021EPI_ISL_2671775 | 21/05/21 | North America / Mexico / Zacatecas           | Human | Female | 28 | Ambulatory   | Nasopharyngeal and pharyngeal swab      |
| hCoV-19/Mexico/ZAC-LANGEBIO_IMSS_0999/2021EPI_ISL_2671776 | 21/05/21 | North America / Mexico / Zacatecas           | Human | Female | 22 | Ambulatory   | Nasopharyngeal and pharyngeal swab      |
| hCoV-19/Mexico/ZAC-LANGEBIO_IMSS_1154/2021EPI_ISL_2671778 | 18/05/21 | North America / Mexico / Zacatecas           | Human | Female | 53 | Ambulatory   | Nasopharyngeal and pharyngeal swab      |
| hCoV-19/Mexico/ZAC-LANGEBIO_IMSS_1155/2021EPI_ISL_2671779 | 18/05/21 | North America / Mexico / Zacatecas           | Human | Male   | 55 | Ambulatory   | Nasopharyngeal and pharyngeal swab      |
| hCoV-19/Mexico/SIN_CIAD-CLN_D0004/2021 EPI_ISL_2680916    | 01/06/21 | North America / Mexico / Sinaloa / Culiacan  | Human | Male   | 54 | unknown      | Oropharyngeal swab                      |
| hCoV-19/Mexico/SIN_CIAD-CLN_D0019/2021 EPI_ISL_2680917    | 01/06/21 | North America / Mexico / Sinaloa / Navolato  | Human | Female | 72 | unknown      | Oropharyngeal swab                      |
| hCoV-19/Mexico/SIN_CIAD-MZT_S7021/2021 EPI_ISL_2680939    | 05/06/21 | North America / Mexico / Sinaloa / Mazatlan  | Human | Male   | 31 | Ambulatory   | Oropharyngeal swab                      |
| hCoV-19/Mexico/SIN_CIAD-MZT_S7022/2021 EPI_ISL_2680940    | 05/06/21 | North America / Mexico / Sinaloa / Mazatlan  | Human | Male   | 41 | Ambulatory   | Oropharyngeal swab                      |
| hCoV-19/Mexico/SIN_CIAD-MZT_S7029/2021 EPI_ISL_2680942    | 05/06/21 | North America / Mexico / Sinaloa / Mazatlan  | Human | Male   | 56 | Ambulatory   | Oropharyngeal swab                      |
| hCoV-19/Mexico/BCS_IBT_IMSS_1508/2021 EPI_ISL_2681046     | 19/05/21 | North America / Mexico / Baja California Sur | Human | Female | 41 | Hospitalized | Nasopharyngeal swab and pharyngeal swab |
| hCoV-19/Mexico/ZAC_IBT_IMSS_1481/2021 EPI_ISL_2681047     | 31/05/21 | North America / Mexico / Zacatecas           | Human | Female | 57 | Ambulatory   | Nasopharyngeal swab and pharyngeal swab |
| hCoV-19/Mexico/ZAC_IBT_IMSS_1456/2021 EPI_ISL_2681048     | 24/05/21 | North America / Mexico / Zacatecas           | Human | Female | 51 | Ambulatory   | Nasopharyngeal swab and pharyngeal swab |
| hCoV-19/Mexico/ZAC_IBT_IMSS_1491/2021 EPI_ISL_2681049     | 04/06/21 | North America / Mexico / Zacatecas           | Human | Male   | 35 | Ambulatory   | Nasopharyngeal swab and pharyngeal swab |
| hCoV-19/Mexico/CMX_IBT_IMSS_1685/2021 EPI_ISL_2681051     | 03/06/21 | North America / Mexico / Mexico City         | Human | Male   | 98 | Hospitalized | Pharyngeal swab                         |
| hCoV-19/Mexico/ZAC_IBT_IMSS_1496/2021 EPI_ISL_2681052     | 05/06/21 | North America / Mexico / Zacatecas           | Human | Male   | 35 | Ambulatory   | Nasopharyngeal swab and pharyngeal swab |
| hCoV-19/Mexico/CHH_IBT_IMSS_1421/2021 EPI_ISL_2681053     | 26/04/21 | North America / Mexico / Chihuahua           | Human | Female | 79 | Hospitalized | Nasopharyngeal swab                     |
| hCoV-19/Mexico/MEX_IBT_IMSS_1681/2021 EPI_ISL_2681054     | 02/06/21 | North America / Mexico / State of Mexico     | Human | Male   | 41 | Hospitalized | Nasopharyngeal swab and pharyngeal swab |
| hCoV-19/Mexico/MEX_IBT_IMSS_1544/2021 EPI_ISL_2681056     | 25/05/21 | North America / Mexico / State of Mexico     | Human | Male   | 28 | Ambulatory   | Nasopharyngeal swab and pharyngeal swab |
| hCoV-19/Mexico/ZAC_IBT_IMSS_1489/2021 EPI_ISL_2681057     | 03/06/21 | North America / Mexico / Zacatecas           | Human | Female | 47 | Ambulatory   | Nasopharyngeal swab and pharyngeal swab |
| hCoV-19/Mexico/GRO_IBT_IMSS_1688/2021 EPI_ISL_2681060     | 01/06/21 | North America / Mexico / Guerrero            | Human | Male   | 51 | Ambulatory   | Nasopharyngeal swab and pharyngeal swab |
| hCoV-19/Mexico/MEX_IBT_IMSS_1527/2021 EPI_ISL_2681061     | 22/05/21 | North America / Mexico / State of Mexico     | Human | Male   | 29 | Hospitalized | Nasopharyngeal swab and pharyngeal swab |
| hCoV-19/Mexico/CMX_IBT_IMSS_1516/2021 EPI_ISL_2681063     | 22/05/21 | North America / Mexico / Mexico City         | Human | Male   | 40 | Hospitalized | Pharyngeal swab                         |

|                                       |                 |          |                                          |       |        |    |              |                                         |
|---------------------------------------|-----------------|----------|------------------------------------------|-------|--------|----|--------------|-----------------------------------------|
| hCoV-19/Mexico/SLP_IBT_IMSS_1488/2021 | EPI_ISL_2681068 | 01/06/21 | North America / Mexico / San Luis Potosi | Human | Male   | 33 | Ambulatory   | Nasopharyngeal swab and pharyngeal swab |
| hCoV-19/Mexico/PUE_IBT_IMSS_1691/2021 | EPI_ISL_2681070 | 02/06/21 | North America / Mexico / Puebla          | Human | Female | 35 | Ambulatory   | Nasopharyngeal swab and pharyngeal swab |
| hCoV-19/Mexico/MOR_IBT_IMSS_1618/2021 | EPI_ISL_2681072 | 29/05/21 | North America / Mexico / Morelos         | Human | Male   | 50 | Hospitalized | Nasopharyngeal swab and pharyngeal swab |
| hCoV-19/Mexico/MEX_IBT_IMSS_1605/2021 | EPI_ISL_2681087 | 25/05/21 | North America / Mexico / State of Mexico | Human | Male   | 28 | Ambulatory   | Nasopharyngeal swab and pharyngeal swab |
| hCoV-19/Mexico/YUC_IBT_IMSS_1487/2021 | EPI_ISL_2681088 | 31/05/21 | North America / Mexico / Yucatan         | Human | Female | 65 | Hospitalized | Nasopharyngeal swab and pharyngeal swab |
| hCoV-19/Mexico/ROO_IBT_IMSS_1641/2021 | EPI_ISL_2681094 | 31/05/21 | North America / Mexico / Quintana Roo    | Human | Female | 27 | Ambulatory   | Nasopharyngeal swab and pharyngeal swab |
| hCoV-19/Mexico/ZAC_IBT_IMSS_1451/2021 | EPI_ISL_2681097 | 21/05/21 | North America / Mexico / Zacatecas       | Human | Female | 34 | Ambulatory   | Nasopharyngeal swab and pharyngeal swab |
| hCoV-19/Mexico/TAB_IBT_IMSS_1651/2021 | EPI_ISL_2681098 | 30/05/21 | North America / Mexico / Tabasco         | Human | Male   | 30 | Hospitalized | Nasopharyngeal swab and pharyngeal swab |
| hCoV-19/Mexico/TAB_IBT_IMSS_1683/2021 | EPI_ISL_2681099 | 31/05/21 | North America / Mexico / Tabasco         | Human | Female | 28 | Ambulatory   | Pharyngeal swab                         |
| hCoV-19/Mexico/MEX_IBT_IMSS_1597/2021 | EPI_ISL_2681105 | 27/05/21 | North America / Mexico / State of Mexico | Human | Male   | 64 | Ambulatory   | Pharyngeal swab                         |
| hCoV-19/Mexico/YUC_IBT_IMSS_1566/2021 | EPI_ISL_2681106 | 01/06/21 | North America / Mexico / Yucatan         | Human | Female | 59 | Hospitalized | Nasopharyngeal swab                     |
| hCoV-19/Mexico/TAB_IBT_IMSS_1672/2021 | EPI_ISL_2681115 | 31/05/21 | North America / Mexico / Tabasco         | Human | Female | 22 | Ambulatory   | Pharyngeal swab                         |
| hCoV-19/Mexico/ZAC_IBT_IMSS_1450/2021 | EPI_ISL_2681119 | 21/05/21 | North America / Mexico / Zacatecas       | Human | Male   | 36 | Ambulatory   | Nasopharyngeal swab and pharyngeal swab |
| hCoV-19/Mexico/ZAC_IBT_IMSS_1475/2021 | EPI_ISL_2681122 | 29/05/21 | North America / Mexico / Zacatecas       | Human | Female | 39 | Ambulatory   | Nasopharyngeal swab and pharyngeal swab |
| hCoV-19/Mexico/MEX_IBT_IMSS_1604/2021 | EPI_ISL_2681128 | 27/05/21 | North America / Mexico / State of Mexico | Human | Female | 32 | Ambulatory   | Nasopharyngeal swab and pharyngeal swab |
| hCoV-19/Mexico/MEX_IBT_IMSS_1550/2021 | EPI_ISL_2681134 | 25/05/21 | North America / Mexico / State of Mexico | Human | Male   | 72 | Hospitalized | Nasopharyngeal swab and pharyngeal swab |
| hCoV-19/Mexico/GRO_IBT_IMSS_1589/2021 | EPI_ISL_2681135 | 24/05/21 | North America / Mexico / Guerrero        | Human | Female | 39 | Ambulatory   | Nasopharyngeal swab and pharyngeal swab |
| hCoV-19/Mexico/MEX_IBT_IMSS_1596/2021 | EPI_ISL_2681138 | 25/05/21 | North America / Mexico / State of Mexico | Human | Male   | 56 | Hospitalized | Nasopharyngeal swab and pharyngeal swab |
| hCoV-19/Mexico/PUE_IBT_IMSS_1520/2021 | EPI_ISL_2681143 | 21/05/21 | North America / Mexico / Puebla          | Human | Female | 66 | Hospitalized | Nasopharyngeal swab and pharyngeal swab |
| hCoV-19/Mexico/VER_IBT_IMSS_1562/2021 | EPI_ISL_2681145 | 26/05/21 | North America / Mexico / Veracruz        | Human | Male   | 46 | Hospitalized | Nasopharyngeal swab and pharyngeal swab |
| hCoV-19/Mexico/MEX_IBT_IMSS_1669/2021 | EPI_ISL_2681148 | 02/06/21 | North America / Mexico / State of Mexico | Human | Male   | 29 | Ambulatory   | Nasopharyngeal swab and pharyngeal swab |
| hCoV-19/Mexico/MEX_IBT_IMSS_1682/2021 | EPI_ISL_2681150 | 03/06/21 | North America / Mexico / State of Mexico | Human | Male   | 27 | Ambulatory   | Nasopharyngeal swab and pharyngeal swab |
| hCoV-19/Mexico/PUE_IBT_IMSS_1524/2021 | EPI_ISL_2681153 | 22/05/21 | North America / Mexico / Puebla          | Human | Male   | 64 | Hospitalized | Nasopharyngeal swab and pharyngeal swab |
| hCoV-19/Mexico/MEX_IBT_IMSS_1690/2021 | EPI_ISL_2681159 | 03/06/21 | North America / Mexico / State of Mexico | Human | Male   | 75 | Hospitalized | Nasopharyngeal swab and pharyngeal swab |
| hCoV-19/Mexico/ZAC_IBT_IMSS_1464/2021 | EPI_ISL_2681160 | 26/05/21 | North America / Mexico / Zacatecas       | Human | Male   | 14 | Ambulatory   | Nasopharyngeal swab and pharyngeal swab |
| hCoV-19/Mexico/QUE_IBT_IMSS_1515/2021 | EPI_ISL_2681161 | 22/05/21 | North America / Mexico / Queretaro       | Human | Male   | 30 | Hospitalized | Nasopharyngeal swab and pharyngeal swab |
| hCoV-19/Mexico/CMX_IBT_IMSS_1534/2021 | EPI_ISL_2681164 | 25/05/21 | North America / Mexico / Mexico City     | Human | Female | 48 | Ambulatory   | Nasopharyngeal swab and pharyngeal swab |
| hCoV-19/Mexico/OAX_IBT_IMSS_1560/2021 | EPI_ISL_2681168 | 25/05/21 | North America / Mexico / Oaxaca          | Human | Female | 29 | Ambulatory   | Nasopharyngeal swab and pharyngeal swab |
| hCoV-19/Mexico/OAX_IBT_IMSS_1561/2021 | EPI_ISL_2681169 | 25/05/21 | North America / Mexico / Oaxaca          | Human | Male   | 25 | Ambulatory   | Nasopharyngeal swab and pharyngeal swab |
| hCoV-19/Mexico/VER_IBT_IMSS_1564/2021 | EPI_ISL_2681170 | 25/05/21 | North America / Mexico / Veracruz        | Human | Female | 26 | Ambulatory   | Nasopharyngeal swab and pharyngeal swab |
| hCoV-19/Mexico/PUE_IBT_IMSS_1582/2021 | EPI_ISL_2681171 | 25/05/21 | North America / Mexico / Puebla          | Human | Female | 20 | Ambulatory   | Nasopharyngeal swab and pharyngeal swab |
| hCoV-19/Mexico/MEX_IBT_IMSS_1635/2021 | EPI_ISL_2681173 | 29/05/21 | North America / Mexico / State of Mexico | Human | Male   | 41 | Hospitalized | Nasopharyngeal swab and pharyngeal swab |
| hCoV-19/Mexico/PUE_IBT_IMSS_1525/2021 | EPI_ISL_2681177 | 22/05/21 | North America / Mexico / Puebla          | Human | Female | 61 | Hospitalized | Nasopharyngeal swab and pharyngeal swab |
| hCoV-19/Mexico/MEX_IBT_IMSS_1621/2021 | EPI_ISL_2681178 | 28/05/21 | North America / Mexico / State of Mexico | Human | Male   | 48 | Ambulatory   | Pharyngeal swab                         |
| hCoV-19/Mexico/MOR_IBT_IMSS_1649/2021 | EPI_ISL_2681183 | 28/05/21 | North America / Mexico / Morelos         | Human | Male   | 52 | Hospitalized | Nasopharyngeal swab and pharyngeal swab |
| hCoV-19/Mexico/VER_IBT_IMSS_1671/2021 | EPI_ISL_2681185 | 31/05/21 | North America / Mexico / Veracruz        | Human | Female | 41 | Hospitalized | Nasopharyngeal swab and pharyngeal swab |
| hCoV-19/Mexico/CMX_IBT_IMSS_1536/2021 | EPI_ISL_2681198 | 26/05/21 | North America / Mexico / Mexico City     | Human | Male   | 53 | Ambulatory   | Pharyngeal swab                         |
| hCoV-19/Mexico/CMX_IBT_IMSS_1610/2021 | EPI_ISL_2681200 | 29/05/21 | North America / Mexico / Mexico City     | Human | Male   | 36 | Ambulatory   | Pharyngeal swab                         |
| hCoV-19/Mexico/VER_IBT_IMSS_1543/2021 | EPI_ISL_2681202 | 24/05/21 | North America / Mexico / Veracruz        | Human | Male   | 37 | Ambulatory   | Nasopharyngeal swab and pharyngeal swab |
| hCoV-19/Mexico/PUE_IBT_IMSS_1521/2021 | EPI_ISL_2681203 | 20/05/21 | North America / Mexico / Puebla          | Human | Male   | 31 | Hospitalized | Nasopharyngeal swab and pharyngeal swab |
| hCoV-19/Mexico/MEX_IBT_IMSS_1528/2021 | EPI_ISL_2681206 | 24/05/21 | North America / Mexico / State of Mexico | Human | Male   | 70 | Ambulatory   | Nasopharyngeal swab and pharyngeal swab |
| hCoV-19/Mexico/ZAC_IBT_IMSS_1458/2021 | EPI_ISL_2681207 | 24/05/21 | North America / Mexico / Zacatecas       | Human | Male   | 48 | Ambulatory   | Nasopharyngeal swab and pharyngeal swab |
| hCoV-19/Mexico/CMX_IBT_IMSS_1684/2021 | EPI_ISL_2681222 | 03/06/21 | North America / Mexico / Mexico City     | Human | Male   | 98 | Hospitalized | Pharyngeal swab                         |
| hCoV-19/Mexico/ZAC_IBT_IMSS_1459/2021 | EPI_ISL_2681223 | 24/05/21 | North America / Mexico / Zacatecas       | Human | Male   | 56 | Hospitalized | Nasopharyngeal swab and pharyngeal swab |

|                                       |                 |          |                                          |       |        |    |              |                                         |
|---------------------------------------|-----------------|----------|------------------------------------------|-------|--------|----|--------------|-----------------------------------------|
| hCoV-19/Mexico/MOR_IBT_IMSS_1511/2021 | EPI_ISL_2681224 | 22/05/21 | North America / Mexico / Morelos         | Human | Male   | 27 | Ambulatory   | Nasopharyngeal swab and pharyngeal swab |
| hCoV-19/Mexico/CHH_IBT_IMSS_1406/2021 | EPI_ISL_2681228 | 27/05/21 | North America / Mexico / Chihuahua       | Human | Female | 77 | Hospitalized | Nasopharyngeal swab and pharyngeal swab |
| hCoV-19/Mexico/ZAC_IBT_IMSS_1468/2021 | EPI_ISL_2681234 | 26/05/21 | North America / Mexico / Zacatecas       | Human | Male   | 32 | Ambulatory   | Nasopharyngeal swab and pharyngeal swab |
| hCoV-19/Mexico/ZAC_IBT_IMSS_1469/2021 | EPI_ISL_2681239 | 26/05/21 | North America / Mexico / Zacatecas       | Human | Female | 24 | Ambulatory   | Nasopharyngeal swab and pharyngeal swab |
| hCoV-19/Mexico/ZAC_IBT_IMSS_1473/2021 | EPI_ISL_2681242 | 21/05/21 | North America / Mexico / Zacatecas       | Human | Male   | 21 | Ambulatory   | Nasopharyngeal swab and pharyngeal swab |
| hCoV-19/Mexico/ZAC_IBT_IMSS_1461/2021 | EPI_ISL_2681246 | 25/05/21 | North America / Mexico / Zacatecas       | Human | Female | 65 | Ambulatory   | Nasopharyngeal swab and pharyngeal swab |
| hCoV-19/Mexico/MEX_IBT_IMSS_1503/2021 | EPI_ISL_2681247 | 17/05/21 | North America / Mexico / State of Mexico | Human | Male   | 44 | Hospitalized | Nasopharyngeal swab and pharyngeal swab |
| hCoV-19/Mexico/MEX_IBT_IMSS_1603/2021 | EPI_ISL_2681250 | 27/05/21 | North America / Mexico / State of Mexico | Human | Male   | 43 | Hospitalized | Nasopharyngeal swab and pharyngeal swab |
| hCoV-19/Mexico/GRO_IBT_IMSS_1675/2021 | EPI_ISL_2681253 | 01/06/21 | North America / Mexico / Guerrero        | Human | Female | 38 | Ambulatory   | Nasopharyngeal swab and pharyngeal swab |
| hCoV-19/Mexico/MEX_IBT_IMSS_1634/2021 | EPI_ISL_2681255 | 28/05/21 | North America / Mexico / State of Mexico | Human | Male   | 47 | Hospitalized | Nasopharyngeal swab and pharyngeal swab |
| hCoV-19/Mexico/VER_IBT_IMSS_1660/2021 | EPI_ISL_2681257 | 31/05/21 | North America / Mexico / Veracruz        | Human | Male   | 18 | Ambulatory   | Nasopharyngeal swab and pharyngeal swab |
| hCoV-19/Mexico/CMX_IBT_IMSS_1626/2021 | EPI_ISL_2681262 | 28/05/21 | North America / Mexico / Mexico City     | Human | Male   | 57 | Hospitalized | Pharyngeal swab                         |
| hCoV-19/Mexico/CMX_IBT_IMSS_1499/2021 | EPI_ISL_2681263 | 17/05/21 | North America / Mexico / Mexico City     | Human | Female | 52 | Hospitalized | Nasopharyngeal swab and pharyngeal swab |
| hCoV-19/Mexico/CMX_IBT_IMSS_1645/2021 | EPI_ISL_2681268 | 31/05/21 | North America / Mexico / Mexico City     | Human | Male   | 31 | Hospitalized | Nasopharyngeal swab and pharyngeal swab |
| hCoV-19/Mexico/VER_IBT_IMSS_1559/2021 | EPI_ISL_2681270 | 25/05/21 | North America / Mexico / Veracruz        | Human | Male   | 44 | Ambulatory   | Nasopharyngeal swab and pharyngeal swab |
| hCoV-19/Mexico/ZAC_IBT_IMSS_1495/2021 | EPI_ISL_2681272 | 04/06/21 | North America / Mexico / Zacatecas       | Human | Male   | 33 | Ambulatory   | Nasopharyngeal swab and pharyngeal swab |
| hCoV-19/Mexico/MOR_IBT_IMSS_1617/2021 | EPI_ISL_2681273 | 29/05/21 | North America / Mexico / Morelos         | Human | Male   | 32 | Hospitalized | Nasopharyngeal swab and pharyngeal swab |
| hCoV-19/Mexico/MEX_IBT_IMSS_1529/2021 | EPI_ISL_2681276 | 24/05/21 | North America / Mexico / State of Mexico | Human | Male   | 53 | Hospitalized | Nasopharyngeal swab and pharyngeal swab |
| hCoV-19/Mexico/MEX_IBT_IMSS_1670/2021 | EPI_ISL_2681281 | 31/05/21 | North America / Mexico / State of Mexico | Human | Female | 30 | Ambulatory   | Nasopharyngeal swab and pharyngeal swab |
| hCoV-19/Mexico/MEX_IBT_IMSS_1598/2021 | EPI_ISL_2681283 | 27/05/21 | North America / Mexico / State of Mexico | Human | Female | 31 | Hospitalized | Pharyngeal swab                         |
| hCoV-19/Mexico/CHH_IBT_IMSS_1433/2021 | EPI_ISL_2681285 | 03/06/21 | North America / Mexico / Chihuahua       | Human | Female | 74 | Hospitalized | Nasopharyngeal swab and pharyngeal swab |
| hCoV-19/Mexico/ZAC_IBT_IMSS_1463/2021 | EPI_ISL_2681286 | 26/05/21 | North America / Mexico / Zacatecas       | Human | Female | 2  | Ambulatory   | Nasopharyngeal swab and pharyngeal swab |
| hCoV-19/Mexico/CMX_IBT_IMSS_1599/2021 | EPI_ISL_2681287 | 27/05/21 | North America / Mexico / Mexico City     | Human | Male   | 57 | Hospitalized | Pharyngeal swab                         |
| hCoV-19/Mexico/CMX_IBT_IMSS_1665/2021 | EPI_ISL_2681288 | 01/06/21 | North America / Mexico / Mexico City     | Human | Female | 56 | Ambulatory   | Nasopharyngeal swab and pharyngeal swab |
| hCoV-19/Mexico/ZAC_IBT_IMSS_1445/2021 | EPI_ISL_2681291 | 21/05/21 | North America / Mexico / Zacatecas       | Human | Female | 34 | Ambulatory   | Nasopharyngeal swab and pharyngeal swab |
| hCoV-19/Mexico/PUE_IBT_IMSS_1505/2021 | EPI_ISL_2681294 | 18/05/21 | North America / Mexico / Puebla          | Human | Male   | 44 | Ambulatory   | Nasopharyngeal swab and pharyngeal swab |
| hCoV-19/Mexico/PUE_IBT_IMSS_1575/2021 | EPI_ISL_2681299 | 26/05/21 | North America / Mexico / Puebla          | Human | Male   | 42 | Ambulatory   | Nasopharyngeal swab and pharyngeal swab |
| hCoV-19/Mexico/CAM_IBT_IMSS_1693/2021 | EPI_ISL_2681300 | 30/05/21 | North America / Mexico / Campeche        | Human | Female | 79 | Hospitalized | Nasopharyngeal swab and pharyngeal swab |
| hCoV-19/Mexico/CMX_IBT_IMSS_1531/2021 | EPI_ISL_2681301 | 25/05/21 | North America / Mexico / Mexico City     | Human | Male   | 67 | Ambulatory   | Nasopharyngeal swab and pharyngeal swab |
| hCoV-19/Mexico/MEX_IBT_IMSS_1607/2021 | EPI_ISL_2681302 | 27/05/21 | North America / Mexico / State of Mexico | Human | Female | 54 | Hospitalized | Nasopharyngeal swab and pharyngeal swab |
| hCoV-19/Mexico/CMX_IBT_IMSS_1647/2021 | EPI_ISL_2681305 | 31/05/21 | North America / Mexico / Mexico City     | Human | Male   | 51 | Hospitalized | Nasopharyngeal swab and pharyngeal swab |
| hCoV-19/Mexico/CMX_IBT_IMSS_1501/2021 | EPI_ISL_2681307 | 18/05/21 | North America / Mexico / Mexico City     | Human | Male   | 27 | Ambulatory   | Nasopharyngeal swab and pharyngeal swab |
| hCoV-19/Mexico/ZAC_IBT_IMSS_1453/2021 | EPI_ISL_2681309 | 22/05/21 | North America / Mexico / Zacatecas       | Human | Female | 38 | Ambulatory   | Nasopharyngeal swab and pharyngeal swab |
| hCoV-19/Mexico/YUC_IBT_IMSS_1741/2021 | EPI_ISL_2681311 | 03/06/21 | North America / Mexico / Yucatan         | Human | Male   | 71 | Hospitalized | Nasopharyngeal swab                     |
| hCoV-19/Mexico/MOR_IBT_IMSS_1620/2021 | EPI_ISL_2681312 | 29/05/21 | North America / Mexico / Morelos         | Human | Male   | 65 | Hospitalized | Nasopharyngeal swab and pharyngeal swab |
| hCoV-19/Mexico/ZAC_IBT_IMSS_1484/2021 | EPI_ISL_2681315 | 02/06/21 | North America / Mexico / Zacatecas       | Human | Male   | 37 | Ambulatory   | Nasopharyngeal swab and pharyngeal swab |
| hCoV-19/Mexico/AGU_IBT_IMSS_1465/2021 | EPI_ISL_2681317 | 21/05/21 | North America / Mexico / Aguascalientes  | Human | Male   | 43 | Ambulatory   | Nasopharyngeal swab and pharyngeal swab |
| hCoV-19/Mexico/CMX_IBT_IMSS_1551/2021 | EPI_ISL_2681321 | 26/05/21 | North America / Mexico / Mexico City     | Human | Female | 32 | Hospitalized | Nasopharyngeal swab and pharyngeal swab |
| hCoV-19/Mexico/CMX_IBT_IMSS_1533/2021 | EPI_ISL_2681323 | 25/05/21 | North America / Mexico / Mexico City     | Human | Male   | 15 | Ambulatory   | Nasopharyngeal swab and pharyngeal swab |
| hCoV-19/Mexico/PUE_IBT_IMSS_1507/2021 | EPI_ISL_2681329 | 17/05/21 | North America / Mexico / Puebla          | Human | Male   | 30 | Ambulatory   | Nasopharyngeal swab and pharyngeal swab |
| hCoV-19/Mexico/CMX_IBT_IMSS_1498/2021 | EPI_ISL_2681330 | 17/05/21 | North America / Mexico / Mexico City     | Human | Male   | 45 | Ambulatory   | Nasopharyngeal swab and pharyngeal swab |
| hCoV-19/Mexico/MOR_IBT_IMSS_1569/2021 | EPI_ISL_2681334 | 24/05/21 | North America / Mexico / Morelos         | Human | Male   | 43 | Hospitalized | Nasopharyngeal swab and pharyngeal swab |
| hCoV-19/Mexico/CMX_IBT_IMSS_1502/2021 | EPI_ISL_2681335 | 19/05/21 | North America / Mexico / Mexico City     | Human | Male   | 17 | Ambulatory   | Nasopharyngeal swab                     |
| hCoV-19/Mexico/DUR_IBT_IMSS_1428/2021 | EPI_ISL_2681336 | 01/06/21 | North America / Mexico / Durango         | Human | Female | 35 | Hospitalized | Nasopharyngeal swab and pharyngeal swab |

|                                             |                 |          |                                          |       |        |    |              |                                         |
|---------------------------------------------|-----------------|----------|------------------------------------------|-------|--------|----|--------------|-----------------------------------------|
| hCoV-19/Mexico/AGU_IBT_IMSS_1466/2021       | EPI_ISL_2681339 | 24/05/21 | North America / Mexico / Aguascalientes  | Human | Male   | 24 | Ambulatory   | Nasopharyngeal swab and pharyngeal swab |
| hCoV-19/Mexico/ZAC_IBT_IMSS_1476/2021       | EPI_ISL_2681340 | 29/05/21 | North America / Mexico / Zacatecas       | Human | Female | 48 | Hospitalized | Nasopharyngeal swab and pharyngeal swab |
| hCoV-19/Mexico/YUC_IBT_IMSS_1747/2021       | EPI_ISL_2681341 | 03/06/21 | North America / Mexico / Yucatan         | Human | Female | 35 | Ambulatory   | Nasopharyngeal swab and pharyngeal swab |
| hCoV-19/Mexico/MEX_IBT_IMSS_1600/2021       | EPI_ISL_2681343 | 27/05/21 | North America / Mexico / State of Mexico | Human | Female | 62 | Ambulatory   | Nasopharyngeal swab and pharyngeal swab |
| hCoV-19/Mexico/SLP_IBT_IMSS_1479/2021       | EPI_ISL_2681349 | 28/05/21 | North America / Mexico / San Luis Potosi | Human | Male   | 51 | Hospitalized | Nasopharyngeal swab and pharyngeal swab |
| hCoV-19/Mexico/YUC_IBT_IMSS_1694/2021       | EPI_ISL_2681351 | 31/05/21 | North America / Mexico / Yucatan         | Human | Female | 54 | Hospitalized | Nasopharyngeal swab                     |
| hCoV-19/Mexico/ZAC_IBT_IMSS_1477/2021       | EPI_ISL_2681355 | 30/05/21 | North America / Mexico / Zacatecas       | Human | Male   | 49 | Ambulatory   | Nasopharyngeal swab and pharyngeal swab |
| hCoV-19/Mexico/SLP_IBT_IMSS_09956-NC/2021   | EPI_ISL_2681362 | 21/05/21 | North America / Mexico / San Luis Potosi | Human | Male   | 50 | Hospitalized | Nasopharyngeal swab and pharyngeal swab |
| hCoV-19/Mexico/ROO_IBT_IMSS_10294-NC/2021   | EPI_ISL_2681368 | 02/06/21 | North America / Mexico / Quintana Roo    | Human | Male   | 53 | Hospitalized | Nasopharyngeal swab and pharyngeal swab |
| hCoV-19/Mexico/CAM_IBT_IMSS_10140-NC/2021   | EPI_ISL_2681372 | 30/05/21 | North America / Mexico / Campeche        | Human | Female | 51 | Hospitalized | Nasopharyngeal swab and pharyngeal swab |
| hCoV-19/Mexico/CMX_IBT_IMSS_11354-NC/2021   | EPI_ISL_2681373 | 18/05/21 | North America / Mexico / Mexico City     | Human | Male   | 83 | Ambulatory   | Nasopharyngeal swab and pharyngeal swab |
| hCoV-19/Mexico/YUC_IBT_IMSS_10091-NC/2021   | EPI_ISL_2681378 | 01/06/21 | North America / Mexico / Yucatan         | Human | Male   | 51 | Hospitalized | Nasopharyngeal swab                     |
| hCoV-19/Mexico/ZAC_IBT_IMSS_10514-NC/2021   | EPI_ISL_2681381 | 31/05/21 | North America / Mexico / Zacatecas       | Human | Female | 51 | Ambulatory   | Nasopharyngeal swab and pharyngeal swab |
| hCoV-19/Mexico/PUE_IBT_IMSS_1526/2021       | EPI_ISL_2681387 | 20/05/21 | North America / Mexico / Puebla          | Human | Female | 62 | Ambulatory   | Pharyngeal swab                         |
| hCoV-19/Mexico/CMX-InDRE_FD72329_S3239/2021 | EPI_ISL_2688911 | 21/05/21 | North America / Mexico / Mexico City     | Human | Female | 49 | Released     | Oro-pharyngeal swab                     |
| hCoV-19/Mexico/NLE-InDRE_FB16486_S3240/2021 | EPI_ISL_2688912 | 21/05/21 | North America / Mexico / Nuevo Leon      | Human | Male   | 23 | Released     | Oro-pharyngeal swab                     |
| hCoV-19/Mexico/JAL-InDRE_FB16516_S3241/2021 | EPI_ISL_2688913 | 27/05/21 | North America / Mexico / Jalisco         | Human | Male   | 25 | Released     | Oro-pharyngeal swab                     |
| hCoV-19/Mexico/JAL-InDRE_FB16517_S3242/2021 | EPI_ISL_2688914 | 30/05/21 | North America / Mexico / Jalisco         | Human | Male   | 79 | Released     | Oro-pharyngeal swab                     |
| hCoV-19/Mexico/MOR-InDRE_FB16530_S3243/2021 | EPI_ISL_2688915 | 26/05/21 | North America / Mexico / Morelos         | Human | Female | 66 | Released     | Oro-pharyngeal swab                     |
| hCoV-19/Mexico/MOR-InDRE_FB16531_S3244/2021 | EPI_ISL_2688916 | 26/05/21 | North America / Mexico / Morelos         | Human | Female | 38 | Released     | Oro-pharyngeal swab                     |
| hCoV-19/Mexico/MOR-InDRE_FB16532_S3245/2021 | EPI_ISL_2688917 | 26/05/21 | North America / Mexico / Morelos         | Human | Female | 25 | Released     | Oro-pharyngeal swab                     |
| hCoV-19/Mexico/MOR-InDRE_FB16537_S3246/2021 | EPI_ISL_2688918 | 26/05/21 | North America / Mexico / Morelos         | Human | Male   | 57 | Released     | Oro-pharyngeal swab                     |
| hCoV-19/Mexico/CMX-InDRE_FB16844_S3247/2021 | EPI_ISL_2688919 | 18/05/21 | North America / Mexico / Mexico City     | Human | Female | 71 | Released     | Oro-pharyngeal swab                     |
| hCoV-19/Mexico/CMX-InDRE_FB16859_S3248/2021 | EPI_ISL_2688920 | 20/05/21 | North America / Mexico / Mexico City     | Human | Female | 18 | Released     | Oro-pharyngeal swab                     |
| hCoV-19/Mexico/CMX-InDRE_FB16860_S3249/2021 | EPI_ISL_2688921 | 16/05/21 | North America / Mexico / Mexico City     | Human | Female | 82 | Released     | Oro-pharyngeal swab                     |
| hCoV-19/Mexico/CMX-InDRE_FB16861_S3250/2021 | EPI_ISL_2688922 | 19/05/21 | North America / Mexico / Mexico City     | Human | Female | 76 | Released     | Oro-pharyngeal swab                     |
| hCoV-19/Mexico/CMX-InDRE_FB16862_S3251/2021 | EPI_ISL_2688923 | 20/05/21 | North America / Mexico / Mexico City     | Human | Female | 45 | Released     | Oro-pharyngeal swab                     |
| hCoV-19/Mexico/QUE-InDRE_FB16878_S3252/2021 | EPI_ISL_2688924 | 01/06/21 | North America / Mexico / Queretaro       | Human | Male   | 29 | Released     | Oro-pharyngeal swab                     |
| hCoV-19/Mexico/QUE-InDRE_FB16882_S3253/2021 | EPI_ISL_2688925 | 04/06/21 | North America / Mexico / Queretaro       | Human | Female | 58 | Released     | Oro-pharyngeal swab                     |
| hCoV-19/Mexico/CMX-InDRE_FD69867_S3254/2021 | EPI_ISL_2688926 | 18/05/21 | North America / Mexico / Mexico City     | Human | Male   | 42 | Released     | Oro-pharyngeal swab                     |
| hCoV-19/Mexico/TAB-InDRE_FB16927_S3255/2021 | EPI_ISL_2688927 | 01/06/21 | North America / Mexico / Tabasco         | Human | Female | 35 | Released     | Oro-pharyngeal swab                     |
| hCoV-19/Mexico/TAB-InDRE_FB16933_S3256/2021 | EPI_ISL_2688928 | 02/06/21 | North America / Mexico / Tabasco         | Human | Female | 54 | Released     | Oro-pharyngeal swab                     |
| hCoV-19/Mexico/TAB-InDRE_FB16935_S3257/2021 | EPI_ISL_2688929 | 01/06/21 | North America / Mexico / Tabasco         | Human | Female | 48 | Released     | Oro-pharyngeal swab                     |
| hCoV-19/Mexico/TAB-InDRE_FB16938_S3258/2021 | EPI_ISL_2688930 | 03/06/21 | North America / Mexico / Tabasco         | Human | Male   | 54 | Released     | Oro-pharyngeal swab                     |
| hCoV-19/Mexico/TAB-InDRE_FB16940_S3259/2021 | EPI_ISL_2688931 | 03/06/21 | North America / Mexico / Tabasco         | Human | Female | 42 | Released     | Oro-pharyngeal swab                     |
| hCoV-19/Mexico/TAB-InDRE_FB16941_S3260/2021 | EPI_ISL_2688932 | 03/06/21 | North America / Mexico / Tabasco         | Human | Female | 60 | Released     | Oro-pharyngeal swab                     |
| hCoV-19/Mexico/TAB-InDRE_FB16943_S3261/2021 | EPI_ISL_2688933 | 03/06/21 | North America / Mexico / Tabasco         | Human | Female | 44 | Released     | Oro-pharyngeal swab                     |
| hCoV-19/Mexico/TAB-InDRE_FB17015_S3262/2021 | EPI_ISL_2688934 | 04/06/21 | North America / Mexico / Tabasco         | Human | Female | 50 | Released     | Oro-pharyngeal swab                     |
| hCoV-19/Mexico/TAB-InDRE_FB17016_S3263/2021 | EPI_ISL_2688935 | 04/06/21 | North America / Mexico / Tabasco         | Human | Female | 32 | Released     | Oro-pharyngeal swab                     |
| hCoV-19/Mexico/TAB-InDRE_FB17017_S3264/2021 | EPI_ISL_2688936 | 04/06/21 | North America / Mexico / Tabasco         | Human | Male   | 29 | Released     | Oro-pharyngeal swab                     |
| hCoV-19/Mexico/TAB-InDRE_FB17019_S3265/2021 | EPI_ISL_2688937 | 05/06/21 | North America / Mexico / Tabasco         | Human | Male   | 13 | Released     | Oro-pharyngeal swab                     |
| hCoV-19/Mexico/TAB-InDRE_FB17021_S3266/2021 | EPI_ISL_2688938 | 05/06/21 | North America / Mexico / Tabasco         | Human | Male   | 19 | Released     | Oro-pharyngeal swab                     |
| hCoV-19/Mexico/TAB-InDRE_FB17022_S3267/2021 | EPI_ISL_2688939 | 05/06/21 | North America / Mexico / Tabasco         | Human | Female | 36 | Released     | Oro-pharyngeal swab                     |
| hCoV-19/Mexico/TAB-InDRE_FB17023_S3268/2021 | EPI_ISL_2688940 | 05/06/21 | North America / Mexico / Tabasco         | Human | Female | 27 | Released     | Oro-pharyngeal swab                     |

|                                                             |          |                                          |       |        |    |          |                     |
|-------------------------------------------------------------|----------|------------------------------------------|-------|--------|----|----------|---------------------|
| 1CoV-19/Mexico/TAB-InDRE_FB17035_S3269/2021EPI_ISL_2688941  | 07/06/21 | North America / Mexico / Tabasco         | Human | Male   | 46 | Released | Oro-pharyngeal swab |
| 1CoV-19/Mexico/TAB-InDRE_FB17041_S3270/2021EPI_ISL_2688942  | 07/06/21 | North America / Mexico / Tabasco         | Human | Male   | 56 | Released | Oro-pharyngeal swab |
| hCoV-19/Mexico/MIC-InDRE_FB17049_S3271/2021EPI_ISL_2688943  | 18/05/21 | North America / Mexico / Michoacan       | Human | Male   | 45 | Released | Oro-pharyngeal swab |
| hCoV-19/Mexico/MIC-InDRE_FB17051_S3272/2021EPI_ISL_2688944  | 20/05/21 | North America / Mexico / Michoacan       | Human | Female | 47 | Released | Oro-pharyngeal swab |
| hCoV-19/Mexico/MIC-InDRE_FB17054_S3273/2021EPI_ISL_2688945  | 28/05/21 | North America / Mexico / Michoacan       | Human | Male   | 65 | Released | Oro-pharyngeal swab |
| hCoV-19/Mexico/MIC-InDRE_FB17056_S3274/2021EPI_ISL_2688946  | 01/06/21 | North America / Mexico / Michoacan       | Human | Female | 55 | Released | Oro-pharyngeal swab |
| hCoV-19/Mexico/MIC-InDRE_FB17057_S3275/2021EPI_ISL_2688947  | 02/06/21 | North America / Mexico / Michoacan       | Human | Female | 44 | Released | Oro-pharyngeal swab |
| 1CoV-19/Mexico/TAB-InDRE_FB17029_S3276/2021EPI_ISL_2688948  | 06/06/21 | North America / Mexico / Tabasco         | Human | Female | 30 | Released | Oro-pharyngeal swab |
| 1CoV-19/Mexico/TAB-InDRE_FB17195_S3277/2021EPI_ISL_2688949  | 07/06/21 | North America / Mexico / Tabasco         | Human | Female | 53 | Released | Oro-pharyngeal swab |
| 1CoV-19/Mexico/TAB-InDRE_FB17196_S3278/2021EPI_ISL_2688950  | 08/06/21 | North America / Mexico / Tabasco         | Human | Male   | 55 | Released | Oro-pharyngeal swab |
| 1CoV-19/Mexico/TAB-InDRE_FB17197_S3279/2021EPI_ISL_2688951  | 08/06/21 | North America / Mexico / Tabasco         | Human | Female | 56 | Released | Oro-pharyngeal swab |
| 1CoV-19/Mexico/TAB-InDRE_FB17198_S3280/2021EPI_ISL_2688952  | 08/06/21 | North America / Mexico / Tabasco         | Human | Female | 32 | Released | Oro-pharyngeal swab |
| 1CoV-19/Mexico/TAB-InDRE_FB17199_S3281/2021EPI_ISL_2688953  | 08/06/21 | North America / Mexico / Tabasco         | Human | Male   | 43 | Released | Oro-pharyngeal swab |
| 1CoV-19/Mexico/TAB-InDRE_FB17200_S3282/2021EPI_ISL_2688954  | 08/06/21 | North America / Mexico / Tabasco         | Human | Male   | 72 | Released | Oro-pharyngeal swab |
| 1CoV-19/Mexico/TAB-InDRE_FB17027_S3283/2021EPI_ISL_2688955  | 06/06/21 | North America / Mexico / Tabasco         | Human | Female | 35 | Released | Oro-pharyngeal swab |
| 1CoV-19/Mexico/TAB-InDRE_FB17028_S3284/2021EPI_ISL_2688956  | 06/06/21 | North America / Mexico / Tabasco         | Human | Male   | 44 | Released | Oro-pharyngeal swab |
| 1CoV-19/Mexico/CHH-InDRE_FB14903_S3285/2021EPI_ISL_2688957  | 04/05/21 | North America / Mexico / Chihuahua       | Human | Male   | 21 | Released | Oro-pharyngeal swab |
| 1CoV-19/Mexico/TAB-InDRE_FB17025_S3286/2021EPI_ISL_2688958  | 05/06/21 | North America / Mexico / Tabasco         | Human | Female | 23 | Released | Oro-pharyngeal swab |
| 1CoV-19/Mexico/MEX-InDRE_FD71475_S3287/2021EPI_ISL_2688959  | 19/05/21 | North America / Mexico / State of Mexico | Human | Male   | 48 | Released | Oro-pharyngeal swab |
| 1CoV-19/Mexico/CMX-InDRE_FD712432_S3288/2021EPI_ISL_2688960 | 21/05/21 | North America / Mexico / Mexico City     | Human | Female | 58 | Released | Oro-pharyngeal swab |
| 1CoV-19/Mexico/CMX-InDRE_FD71539_S3289/2021EPI_ISL_2688961  | 20/05/21 | North America / Mexico / Mexico City     | Human | Female | 48 | Released | Oro-pharyngeal swab |
| 1CoV-19/Mexico/CMX-InDRE_FD71469_S3290/2021EPI_ISL_2688962  | 20/05/21 | North America / Mexico / Mexico City     | Human | Female | 36 | Released | Oro-pharyngeal swab |
| 1CoV-19/Mexico/CMX-InDRE_FD70507_S3291/2021EPI_ISL_2688963  | 19/05/21 | North America / Mexico / Mexico City     | Human | Male   | 59 | Released | Oro-pharyngeal swab |
| 1CoV-19/Mexico/CMX-InDRE_FD69481_S3292/2021EPI_ISL_2688964  | 17/05/21 | North America / Mexico / Mexico City     | Human | Male   | 27 | Released | Oro-pharyngeal swab |
| 1CoV-19/Mexico/MEX-InDRE_FD71242_S3293/2021EPI_ISL_2688965  | 19/05/21 | North America / Mexico / State of Mexico | Human | Female | 39 | Released | Oro-pharyngeal swab |
| 1CoV-19/Mexico/CMX-InDRE_FD72269_S3294/2021EPI_ISL_2688966  | 21/05/21 | North America / Mexico / Mexico City     | Human | Male   | 34 | Released | Oro-pharyngeal swab |
| 1CoV-19/Mexico/CMX-InDRE_FD69922_S3295/2021EPI_ISL_2688967  | 18/05/21 | North America / Mexico / Mexico City     | Human | Female | 30 | Released | Oro-pharyngeal swab |
| 1CoV-19/Mexico/CMX-InDRE_FD71053_S3296/2021EPI_ISL_2688968  | 19/05/21 | North America / Mexico / Mexico City     | Human | Female | 49 | Released | Oro-pharyngeal swab |
| 1CoV-19/Mexico/QUE-InDRE_FB17257_S3297/2021EPI_ISL_2688969  | 11/06/21 | North America / Mexico / Queretaro       | Human | Male   | 29 | Released | Oro-pharyngeal swab |
| hCoV-19/Mexico/MIC-InDRE_FB16540_S3298/2021EPI_ISL_2688970  | 25/05/21 | North America / Mexico / Michoacan       | Human | Male   | 58 | Released | Oro-pharyngeal swab |
| 1CoV-19/Mexico/ZAC-InDRE_FB16770_S3299/2021EPI_ISL_2688971  | 01/06/21 | North America / Mexico / Zacatecas       | Human | Female | 47 | Released | Oro-pharyngeal swab |
| hCoV-19/Mexico/HID-InDRE_FB16865_S3300/2021EPI_ISL_2688972  | 04/06/21 | North America / Mexico / Hidalgo         | Human | Female | 28 | Released | Oro-pharyngeal swab |
| 1CoV-19/Mexico/MOR-InDRE_FB16886_S3301/2021EPI_ISL_2688973  | 28/05/21 | North America / Mexico / Morelos         | Human | Male   | 62 | Released | Oro-pharyngeal swab |
| 1CoV-19/Mexico/GUA-InDRE_FB16892_S3302/2021EPI_ISL_2688974  | 29/05/21 | North America / Mexico / Guanajuato      | Human | Male   | 52 | Released | Oro-pharyngeal swab |
| hCoV-19/Mexico/JAL-InDRE_FB16893_S3303/2021EPI_ISL_2688975  | 29/05/21 | North America / Mexico / Jalisco         | Human | Male   | 30 | Released | Oro-pharyngeal swab |
| 1CoV-19/Mexico/GUA-InDRE_FB16898_S3304/2021EPI_ISL_2688976  | 01/06/21 | North America / Mexico / Guanajuato      | Human | Male   | 41 | Released | Oro-pharyngeal swab |
| 1CoV-19/Mexico/GUA-InDRE_FB16902_S3305/2021EPI_ISL_2688977  | 31/05/21 | North America / Mexico / Guanajuato      | Human | Female | 21 | Released | Oro-pharyngeal swab |
| 1CoV-19/Mexico/GUA-InDRE_FB16903_S3306/2021EPI_ISL_2688978  | 31/05/21 | North America / Mexico / Guanajuato      | Human | Male   | 46 | Released | Oro-pharyngeal swab |
| 1CoV-19/Mexico/GUA-InDRE_FB16907_S3307/2021EPI_ISL_2688979  | 02/06/21 | North America / Mexico / Guanajuato      | Human | Female | 42 | Released | Oro-pharyngeal swab |
| 1CoV-19/Mexico/CHH-InDRE_FB16974_S3308/2021EPI_ISL_2688980  | 27/05/21 | North America / Mexico / Chihuahua       | Human | Female | 60 | Released | Oro-pharyngeal swab |
| 1CoV-19/Mexico/CHH-InDRE_FB16975_S3309/2021EPI_ISL_2688981  | 27/05/21 | North America / Mexico / Chihuahua       | Human | Male   | 84 | Released | Oro-pharyngeal swab |
| 1CoV-19/Mexico/CHH-InDRE_FB16977_S3310/2021EPI_ISL_2688982  | 28/05/21 | North America / Mexico / Chihuahua       | Human | Female | 63 | Released | Oro-pharyngeal swab |
| 1CoV-19/Mexico/CHH-InDRE_FB16982_S3311/2021EPI_ISL_2688983  | 04/06/21 | North America / Mexico / Chihuahua       | Human | Female | 48 | Released | Oro-pharyngeal swab |
| 1CoV-19/Mexico/CHH-InDRE_FB16983_S3312/2021EPI_ISL_2688984  | 03/06/21 | North America / Mexico / Chihuahua       | Human | Female | 49 | Released | Oro-pharyngeal swab |

|                                                            |          |                                      |       |        |         |              |                     |
|------------------------------------------------------------|----------|--------------------------------------|-------|--------|---------|--------------|---------------------|
| 1CoV-19/Mexico/COA-InDRE_FB17002_S3313/2021EPI_ISL_2688985 | 02/06/21 | North America / Mexico / Coahuila    | Human | Male   | 61      | Released     | Oro-pharyngeal swab |
| 1CoV-19/Mexico/PUE-InDRE_FB17003_S3314/2021EPI_ISL_2688986 | 03/06/21 | North America / Mexico / Puebla      | Human | Male   | 44      | Released     | Oro-pharyngeal swab |
| 1CoV-19/Mexico/PUE-InDRE_FB17006_S3315/2021EPI_ISL_2688987 | 06/06/21 | North America / Mexico / Puebla      | Human | Female | 29      | Released     | Oro-pharyngeal swab |
| 1CoV-19/Mexico/VER-InDRE_FB17094_S3317/2021EPI_ISL_2688988 | 04/06/21 | North America / Mexico / Veracruz    | Human | Male   | 54      | Released     | Oro-pharyngeal swab |
| 1CoV-19/Mexico/VER-InDRE_FB17095_S3318/2021EPI_ISL_2688989 | 04/06/21 | North America / Mexico / Veracruz    | Human | Female | 1       | Released     | Oro-pharyngeal swab |
| 1CoV-19/Mexico/YUC-InDRE_FB17108_S3319/2021EPI_ISL_2688990 | 07/06/21 | North America / Mexico / Yucatan     | Human | Male   | 22      | Released     | Oro-pharyngeal swab |
| 1CoV-19/Mexico/CMX-InDRE_FB16854_S3338/2021EPI_ISL_2689797 | 19/05/21 | North America / Mexico / Mexico City | Human | Female | 50      | Released     | Oro-pharyngeal swab |
| 1CoV-19/Mexico/DUR-InDRE_FD70074_S3350/2021EPI_ISL_2689799 | 15/04/21 | North America / Mexico / Durango     | Human | Male   | 33      | unknown      | Oro-pharyngeal swab |
| 1CoV-19/Mexico/CMX-InDRE_FD70508_S3351/2021EPI_ISL_2689800 | 19/05/21 | North America / Mexico / Mexico City | Human | Male   | 26      | Released     | Oro-pharyngeal swab |
| 1CoV-19/Mexico/CMX-InDRE_FD70510_S3352/2021EPI_ISL_2689801 | 19/05/21 | North America / Mexico / Mexico City | Human | Female | 26      | Hospitalized | Oro-pharyngeal swab |
| 1CoV-19/Mexico/CMX-InDRE_FD72373_S3356/2021EPI_ISL_2689802 | 21/05/21 | North America / Mexico / Mexico City | Human | Male   | 35      | Released     | Oro-pharyngeal swab |
| 1CoV-19/Mexico/CMX-InDRE_FD72425_S3357/2021EPI_ISL_2689803 | 21/05/21 | North America / Mexico / Mexico City | Human | Male   | 27      | Released     | Oro-pharyngeal swab |
| 1CoV-19/Mexico/CMX-InDRE_FB16843_S3358/2021EPI_ISL_2689804 | 20/05/21 | North America / Mexico / Mexico City | Human | Male   | 36      | Released     | Oro-pharyngeal swab |
| hCoV-19/Mexico/SIN-InDRE_FB16913_S3359/2021EPI_ISL_2689805 | 31/05/21 | North America / Mexico / Sinaloa     | Human | Male   | 85      | Hospitalized | Oro-pharyngeal swab |
| 1CoV-19/Mexico/TAB-InDRE_FB17040_S3363/2021EPI_ISL_2689808 | 07/06/21 | North America / Mexico / Tabasco     | Human | Female | 51      | Released     | Oro-pharyngeal swab |
| 1CoV-19/Mexico/TAB-InDRE_FB17044_S3364/2021EPI_ISL_2689809 | 07/06/21 | North America / Mexico / Tabasco     | Human | Male   | 61      | Released     | Oro-pharyngeal swab |
| 1CoV-19/Mexico/TAB-InDRE_FB17045_S3365/2021EPI_ISL_2689810 | 07/06/21 | North America / Mexico / Tabasco     | Human | Male   | 37      | Released     | Oro-pharyngeal swab |
| hCoV-19/Mexico/MIC-InDRE_FB17050_S3366/2021EPI_ISL_2689811 | 22/05/21 | North America / Mexico / Michoacan   | Human | Female | 54      | Released     | Oro-pharyngeal swab |
| hCoV-19/Mexico/MIC-InDRE_FB17055_S3367/2021EPI_ISL_2689812 | 01/06/21 | North America / Mexico / Michoacan   | Human | Female | 70      | Hospitalized | Oro-pharyngeal swab |
| 1CoV-19/Mexico/CMX-InDRE_FB16851_S3370/2021EPI_ISL_2689814 | 17/05/21 | North America / Mexico / Mexico City | Human | Female | 60      | Released     | Oro-pharyngeal swab |
| 1CoV-19/Mexico/CMX-InDRE_FD70821_S3371/2021EPI_ISL_2689815 | 19/05/21 | North America / Mexico / Mexico City | Human | Male   | 29      | Released     | Oro-pharyngeal swab |
| 1CoV-19/Mexico/CMX-InDRE_FD69746_S3372/2021EPI_ISL_2689816 | 17/05/21 | North America / Mexico / Mexico City | Human | Female | 89      | Hospitalized | Oro-pharyngeal swab |
| 1CoV-19/Mexico/CMX-InDRE_FD70018_S3373/2021EPI_ISL_2689817 | 18/05/21 | North America / Mexico / Mexico City | Human | Male   | 43      | Released     | Oro-pharyngeal swab |
| 1CoV-19/Mexico/CMX-InDRE_FD71251_S3374/2021EPI_ISL_2689818 | 19/05/21 | North America / Mexico / Mexico City | Human | Male   | 43      | Released     | Oro-pharyngeal swab |
| 1CoV-19/Mexico/CMX-InDRE_FD70188_S3375/2021EPI_ISL_2689819 | 18/05/21 | North America / Mexico / Mexico City | Human | Male   | 56      | Hospitalized | Oro-pharyngeal swab |
| 1CoV-19/Mexico/DUR-InDRE_FD70075_S3377/2021EPI_ISL_2689820 | 15/04/21 | North America / Mexico / Durango     | Human | Male   | unknown | unknown      | Oro-pharyngeal swab |
| 1CoV-19/Mexico/CMX-InDRE_FD70779_S3378/2021EPI_ISL_2689821 | 18/05/21 | North America / Mexico / Mexico City | Human | Male   | 36      | Released     | Oro-pharyngeal swab |
| 1CoV-19/Mexico/CMX-InDRE_FD72223_S3379/2021EPI_ISL_2689822 | 21/05/21 | North America / Mexico / Mexico City | Human | Female | 44      | Released     | Oro-pharyngeal swab |
| 1CoV-19/Mexico/CMX-InDRE_FD69965_S3381/2021EPI_ISL_2689823 | 18/05/21 | North America / Mexico / Mexico City | Human | Female | 59      | Released     | Oro-pharyngeal swab |
| hCoV-19/Mexico/MIC-InDRE_FB16542_S3385/2021EPI_ISL_2689825 | 21/05/21 | North America / Mexico / Michoacan   | Human | Male   | 59      | Hospitalized | Oro-pharyngeal swab |
| 1CoV-19/Mexico/CHH-InDRE_FB16979_S3396/2021EPI_ISL_2689828 | 31/05/21 | North America / Mexico / Chihuahua   | Human | Female | 43      | Released     | Oro-pharyngeal swab |
| hCoV-19/Mexico/YUC-INMEGEN-06-02-5/2021 EPI_ISL_2692543    | 06/06/21 | North America / Mexico / Yucatan     | Human | Male   | 15      | unknown      | Oropharyngeal swab  |
| hCoV-19/Mexico/YUC-INMEGEN-06-02-10/2021 EPI_ISL_2692548   | 05/06/21 | North America / Mexico / Yucatan     | Human | Male   | 36      | unknown      | Oropharyngeal swab  |
| hCoV-19/Mexico/YUC-INMEGEN-06-02-13/2021 EPI_ISL_2692550   | 06/06/21 | North America / Mexico / Yucatan     | Human | Female | 31      | unknown      | Oropharyngeal swab  |
| hCoV-19/Mexico/YUC-INMEGEN-06-02-46/2021 EPI_ISL_2692581   | 07/06/21 | North America / Mexico / Yucatan     | Human | Female | 31      | unknown      | Oropharyngeal swab  |
| hCoV-19/Mexico/TAM-INMEGEN-06-02-56/2021 EPI_ISL_2692589   | 05/06/21 | North America / Mexico / Tamaulipas  | Human | Female | 38      | unknown      | Oropharyngeal swab  |
| hCoV-19/Mexico/TAM-INMEGEN-06-02-64/2021 EPI_ISL_2692596   | 05/06/21 | North America / Mexico / Tamaulipas  | Human | Male   | 43      | unknown      | Oropharyngeal swab  |
| hCoV-19/Mexico/VER-INMEGEN-06-02-71/2021 EPI_ISL_2692602   | 07/06/21 | North America / Mexico / Veracruz    | Human | Male   | 34      | unknown      | Oropharyngeal swab  |
| hCoV-19/Mexico/TAB-INMEGEN-06-02-110/2021 EPI_ISL_2692636  | 07/06/21 | North America / Mexico / Tabasco     | Human | Female | 23      | unknown      | Oropharyngeal swab  |
| hCoV-19/Mexico/YUC-INMEGEN-06-02-121/2021 EPI_ISL_2692645  | 07/06/21 | North America / Mexico / Yucatan     | Human | Male   | 34      | unknown      | Oropharyngeal swab  |
| hCoV-19/Mexico/TAB-INMEGEN-06-02-126/2021 EPI_ISL_2692649  | 07/06/21 | North America / Mexico / Tabasco     | Human | Male   | 26      | unknown      | Oropharyngeal swab  |
| hCoV-19/Mexico/YUC-INMEGEN-06-02-139/2021 EPI_ISL_2692660  | 08/06/21 | North America / Mexico / Yucatan     | Human | Female | 35      | unknown      | Oropharyngeal swab  |
| hCoV-19/Mexico/TAM-INMEGEN-06-02-143/2021 EPI_ISL_2692663  | 06/06/21 | North America / Mexico / Tamaulipas  | Human | Female | 28      | unknown      | Oropharyngeal swab  |
| hCoV-19/Mexico/TAB-INMEGEN-06-02-166/2021 EPI_ISL_2692682  | 07/06/21 | North America / Mexico / Tabasco     | Human | Female | 36      | unknown      | Oropharyngeal swab  |

|                                             |                 |          |                                              |       |        |    |              |                    |
|---------------------------------------------|-----------------|----------|----------------------------------------------|-------|--------|----|--------------|--------------------|
| hCoV-19/Mexico/MEX-INMEGEN-06-02-268/2021   | EPI_ISL_2692785 | 13/06/21 | North America / Mexico / State of Mexico     | Human | Female | 22 | unknown      | Oropharyngeal swab |
| hCoV-19/Mexico/MEX-INMEGEN-06-02-291/2021   | EPI_ISL_2692786 | 26/05/21 | North America / Mexico / State of Mexico     | Human | Female | 21 | unknown      | Oropharyngeal swab |
| hCoV-19/Mexico/MEX-INMEGEN-06-02-296/2021   | EPI_ISL_2692789 | 26/05/21 | North America / Mexico / Mexico City         | Human | Male   | 37 | unknown      | Oropharyngeal swab |
| hCoV-19/Mexico/CMX-INMEGEN-06-02-303/2021   | EPI_ISL_2692794 | 26/05/21 | North America / Mexico / Mexico City         | Human | Male   | 43 | unknown      | Oropharyngeal swab |
| hCoV-19/Mexico/MEX-INMEGEN-06-02-311/2021   | EPI_ISL_2692801 | 26/05/21 | North America / Mexico / State of Mexico     | Human | Male   | 37 | unknown      | Oropharyngeal swab |
| hCoV-19/Mexico/TAB-INMEGEN-06-02-323/2021   | EPI_ISL_2692810 | 01/06/21 | North America / Mexico / Tabasco             | Human | Female | 9  | unknown      | Oropharyngeal swab |
| hCoV-19/Mexico/TAB-INMEGEN-06-02-324/2021   | EPI_ISL_2692811 | 01/06/21 | North America / Mexico / Tabasco             | Human | Female | 50 | unknown      | Oropharyngeal swab |
| hCoV-19/Mexico/TAB-INMEGEN-06-02-326/2021   | EPI_ISL_2692812 | 01/06/21 | North America / Mexico / Tabasco             | Human | Female | 39 | unknown      | Oropharyngeal swab |
| hCoV-19/Mexico/MEX-INMEGEN-06-02-345/2021   | EPI_ISL_2692828 | 02/06/21 | North America / Mexico / State of Mexico     | Human | Female | 26 | unknown      | Oropharyngeal swab |
| hCoV-19/Mexico/CMX-INMEGEN-06-02-353/2021   | EPI_ISL_2692831 | 02/06/21 | North America / Mexico / Mexico City         | Human | Female | 58 | unknown      | Oropharyngeal swab |
| hCoV-19/Mexico/CMX-INMEGEN-06-02-367/2021   | EPI_ISL_2692844 | 18/06/21 | North America / Mexico / Mexico City         | Human | Male   | 33 | unknown      | Oropharyngeal swab |
| hCoV-19/Mexico/MIC-InDRE_FB17062_S3316/2021 | EPI_ISL_2709688 | 02/06/21 | North America / Mexico / Michoacan           | Human | Female | 67 | Released     | Oropharyngeal swab |
| hCoV-19/Mexico/GRO-InDRE_FB16468_S3447/2021 | EPI_ISL_2736841 | 25/05/21 | North America / Mexico / Guerrero            | Human | Male   | 20 | Released     | Oropharyngeal swab |
| hCoV-19/Mexico/YUC-InDRE_FB17560_S3449/2021 | EPI_ISL_2736845 | 07/06/21 | North America / Mexico / Yucatan             | Human | Male   | 22 | Released     | Oropharyngeal swab |
| hCoV-19/Mexico/MIC-InDRE_FB17629_S3452/2021 | EPI_ISL_2736848 | 08/06/21 | North America / Mexico / Michoacan           | Human | Female | 64 | Deceased     | Oropharyngeal swab |
| hCoV-19/Mexico/MIC-InDRE_FB17632_S3453/2021 | EPI_ISL_2736849 | 10/06/21 | North America / Mexico / Michoacan           | Human | Male   | 64 | Deceased     | Oropharyngeal swab |
| hCoV-19/Mexico/MIC-InDRE_FB17633_S3454/2021 | EPI_ISL_2736851 | 07/06/21 | North America / Mexico / Michoacan           | Human | Male   | 18 | Released     | Oropharyngeal swab |
| hCoV-19/Mexico/TAB-InDRE_FB17704_S3457/2021 | EPI_ISL_2736853 | 14/06/21 | North America / Mexico / Tabasco             | Human | Male   | 41 | Released     | Oropharyngeal swab |
| hCoV-19/Mexico/CAM-InDRE_FB17065_S3463/2021 | EPI_ISL_2736857 | 29/05/21 | North America / Mexico / Campeche            | Human | Female | 41 | Hospitalized | Oropharyngeal swab |
| hCoV-19/Mexico/GUA-InDRE_FB17335_S3467/2021 | EPI_ISL_2736861 | 08/06/21 | North America / Mexico / Guanajuato          | Human | Female | 49 | Released     | Oropharyngeal swab |
| hCoV-19/Mexico/GUA-InDRE_FB17324_S3468/2021 | EPI_ISL_2736864 | 05/06/21 | North America / Mexico / Guanajuato          | Human | Female | 32 | Released     | Oropharyngeal swab |
| hCoV-19/Mexico/CMX-INER-IBT-0251/2021       | EPI_ISL_2777211 | 04/06/21 | North America / Mexico / Mexico City         | Human | Male   | 39 | Hospitalized |                    |
| hCoV-19/Mexico/CMX-INER-IBT-0258/2021       | EPI_ISL_2777218 | 31/05/21 | North America / Mexico / Mexico City         | Human | Female | 60 | Released     |                    |
| hCoV-19/Mexico/CMX-INER-INMEGEN-00243/2021  | EPI_ISL_2778012 | 10/06/21 | North America / Mexico / Mexico City         | Human | Male   | 29 | unknown      |                    |
| hCoV-19/Mexico/CAM-InDRE_FB14883_S3692/2021 | EPI_ISL_2779195 | 06/05/21 | North America / Mexico / Campeche            | Human | Female | 28 | Released     | Oropharyngeal swab |
| hCoV-19/Mexico/GRO-InDRE_FB17155_S3693/2021 | EPI_ISL_2779196 | 01/06/21 | North America / Mexico / Guerrero            | Human | Male   | 59 | Released     | Oropharyngeal swab |
| hCoV-19/Mexico/BCS-InDRE_FB17281_S3694/2021 | EPI_ISL_2779197 | 01/06/21 | North America / Mexico / Baja California Sur | Human | Female | 45 | Released     | Oropharyngeal swab |
| hCoV-19/Mexico/TAB-InDRE_FB17295_S3695/2021 | EPI_ISL_2779198 | 09/06/21 | North America / Mexico / Tabasco             | Human | Male   | 25 | Released     | Oropharyngeal swab |
| hCoV-19/Mexico/TAB-InDRE_FB17296_S3696/2021 | EPI_ISL_2779199 | 09/06/21 | North America / Mexico / Tabasco             | Human | Male   | 36 | Released     | Oropharyngeal swab |
| hCoV-19/Mexico/TAB-InDRE_FB17297_S3697/2021 | EPI_ISL_2779200 | 09/06/21 | North America / Mexico / Tabasco             | Human | Male   | 31 | Released     | Oropharyngeal swab |
| hCoV-19/Mexico/TAB-InDRE_FB17302_S3698/2021 | EPI_ISL_2779201 | 09/06/21 | North America / Mexico / Tabasco             | Human | Female | 31 | Released     | Oropharyngeal swab |
| hCoV-19/Mexico/TAB-InDRE_FB17304_S3699/2021 | EPI_ISL_2779202 | 09/06/21 | North America / Mexico / Tabasco             | Human | Male   | 54 | Released     | Oropharyngeal swab |
| hCoV-19/Mexico/TAB-InDRE_FB17305_S3700/2021 | EPI_ISL_2779203 | 09/06/21 | North America / Mexico / Tabasco             | Human | Male   | 35 | Released     | Oropharyngeal swab |
| hCoV-19/Mexico/TAB-InDRE_FB17307_S3701/2021 | EPI_ISL_2779204 | 09/06/21 | North America / Mexico / Tabasco             | Human | Male   | 35 | Released     | Oropharyngeal swab |
| hCoV-19/Mexico/TAB-InDRE_FB17309_S3702/2021 | EPI_ISL_2779205 | 10/06/21 | North America / Mexico / Tabasco             | Human | Male   | 35 | Released     | Oropharyngeal swab |
| hCoV-19/Mexico/TAB-InDRE_FB17310_S3703/2021 | EPI_ISL_2779206 | 10/06/21 | North America / Mexico / Tabasco             | Human | Female | 50 | Released     | Oropharyngeal swab |
| hCoV-19/Mexico/TAB-InDRE_FB17311_S3704/2021 | EPI_ISL_2779207 | 18/06/21 | North America / Mexico / Tabasco             | Human | Female | 50 | Released     | Oropharyngeal swab |
| hCoV-19/Mexico/TAB-InDRE_FB17312_S3705/2021 | EPI_ISL_2779208 | 10/06/21 | North America / Mexico / Tabasco             | Human | Female | 38 | Released     | Oropharyngeal swab |
| hCoV-19/Mexico/TAB-InDRE_FB17316_S3706/2021 | EPI_ISL_2779209 | 10/06/21 | North America / Mexico / Tabasco             | Human | Female | 33 | Released     | Oropharyngeal swab |
| hCoV-19/Mexico/TAB-InDRE_FB17318_S3707/2021 | EPI_ISL_2779210 | 10/06/21 | North America / Mexico / Tabasco             | Human | Male   | 51 | Released     | Oropharyngeal swab |
| hCoV-19/Mexico/PUE-InDRE_FB16348_S3708/2021 | EPI_ISL_2779211 | 22/05/21 | North America / Mexico / Puebla              | Human | Male   | 84 | Deceased     | Oropharyngeal swab |
| hCoV-19/Mexico/PUE-InDRE_FB16349_S3709/2021 | EPI_ISL_2779212 | 22/05/21 | North America / Mexico / Puebla              | Human | Male   | 38 | Hospitalized | Oropharyngeal swab |
| hCoV-19/Mexico/SON-InDRE_FB16354_S3710/2021 | EPI_ISL_2779213 | 16/05/21 | North America / Mexico / Sonora              | Human | Male   | 47 | Deceased     | Oropharyngeal swab |
| hCoV-19/Mexico/GRO-InDRE_FB16449_S3711/2021 | EPI_ISL_2779214 | 23/05/21 | North America / Mexico / Guerrero            | Human | Male   | 25 | Released     | Oropharyngeal swab |



|                                                            |          |                                     |       |        |    |          |                    |
|------------------------------------------------------------|----------|-------------------------------------|-------|--------|----|----------|--------------------|
| 1CoV-19/Mexico/GUA-InDRE_FB16453_S3712/2021EPI_ISL_2779215 | 20/05/21 | North America / Mexico / Guanajuato | Human | Female | 37 | Released | Oropharyngeal swab |
| 1CoV-19/Mexico/GUA-InDRE_FB16454_S3713/2021EPI_ISL_2779216 | 21/05/21 | North America / Mexico / Guanajuato | Human | Female | 28 | Released | Oropharyngeal swab |
| 1CoV-19/Mexico/GUA-InDRE_FB16456_S3714/2021EPI_ISL_2779217 | 24/05/21 | North America / Mexico / Guanajuato | Human | Male   | 17 | Released | Oropharyngeal swab |
| 1CoV-19/Mexico/GUA-InDRE_FB16462_S3715/2021EPI_ISL_2779218 | 24/05/21 | North America / Mexico / Guanajuato | Human | Female | 20 | Released | Oropharyngeal swab |
| 1CoV-19/Mexico/TAM-InDRE_FB17459_S3716/2021EPI_ISL_2779219 | 02/06/21 | North America / Mexico / Tamaulipas | Human | Female | 57 | Released | Oropharyngeal swab |
| hCoV-19/Mexico/SIN-InDRE_FB17472_S3717/2021EPI_ISL_2779220 | 07/06/21 | North America / Mexico / Sinaloa    | Human | Male   | 2M | Released | Oropharyngeal swab |
| 1CoV-19/Mexico/YUC-InDRE_FB17489_S3718/2021EPI_ISL_2779221 | 01/06/21 | North America / Mexico / Yucatan    | Human | Male   | 51 | Released | Oropharyngeal swab |
| 1CoV-19/Mexico/YUC-InDRE_FB17491_S3719/2021EPI_ISL_2779222 | 01/06/21 | North America / Mexico / Yucatan    | Human | Male   | 25 | Released | Oropharyngeal swab |
| 1CoV-19/Mexico/YUC-InDRE_FB17496_S3720/2021EPI_ISL_2779223 | 01/06/21 | North America / Mexico / Yucatan    | Human | Male   | 43 | Released | Oropharyngeal swab |
| 1CoV-19/Mexico/YUC-InDRE_FB17538_S3721/2021EPI_ISL_2779224 | 03/06/21 | North America / Mexico / Yucatan    | Human | Male   | 15 | Released | Oropharyngeal swab |
| 1CoV-19/Mexico/YUC-InDRE_FB17539_S3722/2021EPI_ISL_2779225 | 04/06/21 | North America / Mexico / Yucatan    | Human | Male   | 15 | Released | Oropharyngeal swab |
| hCoV-19/Mexico/MIC-InDRE_FB16469_S3723/2021EPI_ISL_2779226 | 25/05/21 | North America / Mexico / Michoacan  | Human | Female | 20 | Released | Oropharyngeal swab |
| 1CoV-19/Mexico/GRO-InDRE_FB16471_S3724/2021EPI_ISL_2779227 | 25/05/21 | North America / Mexico / Guerrero   | Human | Female | 22 | Released | Oropharyngeal swab |
| 1CoV-19/Mexico/YUC-InDRE_FB17566_S3725/2021EPI_ISL_2779228 | 08/06/21 | North America / Mexico / Yucatan    | Human | Female | 43 | Released | Oropharyngeal swab |
| 1CoV-19/Mexico/YUC-InDRE_FB17586_S3726/2021EPI_ISL_2779229 | 10/06/21 | North America / Mexico / Yucatan    | Human | Female | 59 | Released | Oropharyngeal swab |
| 1CoV-19/Mexico/YUC-InDRE_FB17587_S3727/2021EPI_ISL_2779230 | 10/06/21 | North America / Mexico / Yucatan    | Human | Male   | 58 | Released | Oropharyngeal swab |
| 1CoV-19/Mexico/YUC-InDRE_FB17594_S3728/2021EPI_ISL_2779231 | 10/06/21 | North America / Mexico / Yucatan    | Human | Male   | 39 | Released | Oropharyngeal swab |
| hCoV-19/Mexico/MIC-InDRE_FB17631_S3729/2021EPI_ISL_2779232 | 10/06/21 | North America / Mexico / Michoacan  | Human | Female | 51 | Released | Oropharyngeal swab |
| hCoV-19/Mexico/MIC-InDRE_FB17634_S3730/2021EPI_ISL_2779233 | 07/06/21 | North America / Mexico / Michoacan  | Human | Male   | 64 | Deceased | Oropharyngeal swab |
| 1CoV-19/Mexico/TAB-InDRE_FB17649_S3731/2021EPI_ISL_2779234 | 11/06/21 | North America / Mexico / Tabasco    | Human | Female | 41 | Released | Oropharyngeal swab |
| 1CoV-19/Mexico/TAB-InDRE_FB17650_S3732/2021EPI_ISL_2779235 | 11/06/21 | North America / Mexico / Tabasco    | Human | Male   | 37 | Released | Oropharyngeal swab |
| 1CoV-19/Mexico/TAB-InDRE_FB17658_S3734/2021EPI_ISL_2779236 | 11/06/21 | North America / Mexico / Tabasco    | Human | Male   | 28 | Released | Oropharyngeal swab |
| 1CoV-19/Mexico/TAB-InDRE_FB17659_S3735/2021EPI_ISL_2779237 | 11/06/21 | North America / Mexico / Tabasco    | Human | Male   | 42 | Released | Oropharyngeal swab |
| 1CoV-19/Mexico/TAB-InDRE_FB17664_S3736/2021EPI_ISL_2779238 | 11/06/21 | North America / Mexico / Tabasco    | Human | Female | 57 | Released | Oropharyngeal swab |
| 1CoV-19/Mexico/TAB-InDRE_FB17665_S3737/2021EPI_ISL_2779239 | 11/06/21 | North America / Mexico / Tabasco    | Human | Male   | 52 | Released | Oropharyngeal swab |
| 1CoV-19/Mexico/TAB-InDRE_FB17667_S3738/2021EPI_ISL_2779240 | 11/06/21 | North America / Mexico / Tabasco    | Human | Male   | 55 | Released | Oropharyngeal swab |
| 1CoV-19/Mexico/TAB-InDRE_FB17668_S3738/2021EPI_ISL_2779241 | 11/06/21 | North America / Mexico / Tabasco    | Human | Female | 54 | Released | Oropharyngeal swab |
| 1CoV-19/Mexico/TAB-InDRE_FB17669_S3740/2021EPI_ISL_2779242 | 11/06/21 | North America / Mexico / Tabasco    | Human | Female | 44 | Released | Oropharyngeal swab |
| 1CoV-19/Mexico/TAB-InDRE_FB17678_S3741/2021EPI_ISL_2779243 | 12/06/21 | North America / Mexico / Tabasco    | Human | Male   | 22 | Released | Oropharyngeal swab |
| 1CoV-19/Mexico/TAB-InDRE_FB17683_S3742/2021EPI_ISL_2779244 | 13/06/21 | North America / Mexico / Tabasco    | Human | Female | 39 | Released | Oropharyngeal swab |
| 1CoV-19/Mexico/TAB-InDRE_FB17684_S3743/2021EPI_ISL_2779245 | 13/06/21 | North America / Mexico / Tabasco    | Human | Female | 38 | Released | Oropharyngeal swab |
| 1CoV-19/Mexico/TAB-InDRE_FB17685_S3744/2021EPI_ISL_2779246 | 13/06/21 | North America / Mexico / Tabasco    | Human | Male   | 55 | Released | Oropharyngeal swab |
| 1CoV-19/Mexico/TAB-InDRE_FB17690_S3745/2021EPI_ISL_2779247 | 14/06/21 | North America / Mexico / Tabasco    | Human | Male   | 58 | Released | Oropharyngeal swab |
| 1CoV-19/Mexico/TAB-InDRE_FB17691_S3746/2021EPI_ISL_2779248 | 14/06/21 | North America / Mexico / Tabasco    | Human | Male   | 35 | Released | Oropharyngeal swab |
| 1CoV-19/Mexico/TAB-InDRE_FB17692_S3747/2021EPI_ISL_2779249 | 14/06/21 | North America / Mexico / Tabasco    | Human | Male   | 56 | Released | Oropharyngeal swab |
| 1CoV-19/Mexico/TAB-InDRE_FB17697_S3748/2021EPI_ISL_2779250 | 14/06/21 | North America / Mexico / Tabasco    | Human | Female | 48 | Released | Oropharyngeal swab |
| 1CoV-19/Mexico/TAB-InDRE_FB17698_S3749/2021EPI_ISL_2779251 | 14/06/21 | North America / Mexico / Tabasco    | Human | Female | 22 | Released | Oropharyngeal swab |
| 1CoV-19/Mexico/TAB-InDRE_FB17699_S3750/2021EPI_ISL_2779252 | 14/06/21 | North America / Mexico / Tabasco    | Human | Male   | 55 | Released | Oropharyngeal swab |
| 1CoV-19/Mexico/TAB-InDRE_FB17700_S3751/2021EPI_ISL_2779253 | 14/06/21 | North America / Mexico / Tabasco    | Human | Male   | 59 | Released | Oropharyngeal swab |
| 1CoV-19/Mexico/TAB-InDRE_FB17701_S3752/2021EPI_ISL_2779254 | 14/06/21 | North America / Mexico / Tabasco    | Human | Male   | 43 | Released | Oropharyngeal swab |
| 1CoV-19/Mexico/TAB-InDRE_FB17702_S3753/2021EPI_ISL_2779255 | 14/06/21 | North America / Mexico / Tabasco    | Human | Female | 40 | Released | Oropharyngeal swab |
| 1CoV-19/Mexico/TAB-InDRE_FB17703_S3754/2021EPI_ISL_2779256 | 14/06/21 | North America / Mexico / Tabasco    | Human | Female | 51 | Released | Oropharyngeal swab |
| 1CoV-19/Mexico/PUE-InDRE_FB17746_S3755/2021EPI_ISL_2779257 | 11/06/21 | North America / Mexico / Puebla     | Human | Male   | 27 | Released | Oropharyngeal swab |
| 1CoV-19/Mexico/PUE-InDRE_FB17747_S3756/2021EPI_ISL_2779258 | 11/06/21 | North America / Mexico / Puebla     | Human | Male   | 58 | Released | Oropharyngeal swab |

|                                                            |          |                                          |       |        |    |              |                                    |
|------------------------------------------------------------|----------|------------------------------------------|-------|--------|----|--------------|------------------------------------|
| 1CoV-19/Mexico/PUE-InDRE_FB17748_S3757/2021EPI_ISL_2779259 | 11/06/21 | North America / Mexico / Puebla          | Human | Male   | 33 | Released     | Oropharyngeal swab                 |
| 1CoV-19/Mexico/PUE-InDRE_FB17751_S3758/2021EPI_ISL_2779260 | 11/06/21 | North America / Mexico / Puebla          | Human | Female | 36 | Released     | Oropharyngeal swab                 |
| 1CoV-19/Mexico/PUE-InDRE_FB17752_S3759/2021EPI_ISL_2779261 | 11/06/21 | North America / Mexico / Puebla          | Human | Male   | 47 | Released     | Oropharyngeal swab                 |
| 1CoV-19/Mexico/PUE-InDRE_FB17753_S3760/2021EPI_ISL_2779262 | 11/06/21 | North America / Mexico / Puebla          | Human | Female | 30 | Released     | Oropharyngeal swab                 |
| 1CoV-19/Mexico/PUE-InDRE_FB17758_S3761/2021EPI_ISL_2779263 | 11/06/21 | North America / Mexico / Puebla          | Human | Male   | 26 | Released     | Oropharyngeal swab                 |
| 1CoV-19/Mexico/PUE-InDRE_FB17759_S3762/2021EPI_ISL_2779264 | 11/06/21 | North America / Mexico / Puebla          | Human | Female | 56 | Released     | Oropharyngeal swab                 |
| 1CoV-19/Mexico/PUE-InDRE_FB17760_S3763/2021EPI_ISL_2779265 | 11/06/21 | North America / Mexico / Puebla          | Human | Female | 49 | Deceased     | Oropharyngeal swab                 |
| 1CoV-19/Mexico/PUE-InDRE_FB17761_S3764/2021EPI_ISL_2779266 | 11/06/21 | North America / Mexico / Puebla          | Human | Female | 40 | Released     | Oropharyngeal swab                 |
| 1CoV-19/Mexico/PUE-InDRE_FB17762_S3765/2021EPI_ISL_2779267 | 11/06/21 | North America / Mexico / Puebla          | Human | Female | 60 | Deceased     | Oropharyngeal swab                 |
| 1CoV-19/Mexico/PUE-InDRE_FB17763_S3766/2021EPI_ISL_2779268 | 11/06/21 | North America / Mexico / Puebla          | Human | Male   | 27 | Released     | Oropharyngeal swab                 |
| 1CoV-19/Mexico/PUE-InDRE_FB17769_S3767/2021EPI_ISL_2779269 | 11/06/21 | North America / Mexico / Puebla          | Human | Male   | 46 | Released     | Oropharyngeal swab                 |
| 1CoV-19/Mexico/TAB-InDRE_FB17805_S3769/2021EPI_ISL_2779271 | 15/06/21 | North America / Mexico / Tabasco         | Human | Male   | 25 | Released     | Oropharyngeal swab                 |
| 1CoV-19/Mexico/TAB-InDRE_FB17806_S3770/2021EPI_ISL_2779272 | 15/06/21 | North America / Mexico / Tabasco         | Human | Female | 55 | Released     | Oropharyngeal swab                 |
| 1CoV-19/Mexico/TAB-InDRE_FB17807_S3771/2021EPI_ISL_2779273 | 15/06/21 | North America / Mexico / Tabasco         | Human | Male   | 56 | Released     | Oropharyngeal swab                 |
| 1CoV-19/Mexico/TAB-InDRE_FB17809_S3772/2021EPI_ISL_2779274 | 15/06/21 | North America / Mexico / Tabasco         | Human | Female | 50 | Released     | Oropharyngeal swab                 |
| 1CoV-19/Mexico/TAB-InDRE_FB17811_S3773/2021EPI_ISL_2779275 | 15/06/21 | North America / Mexico / Tabasco         | Human | Male   | 72 | Hospitalized | Oropharyngeal swab                 |
| 1CoV-19/Mexico/GUA-InDRE_FB17343_S3774/2021EPI_ISL_2779276 | 08/06/21 | North America / Mexico / Guanajuato      | Human | Female | 68 | Released     | Oropharyngeal swab                 |
| 1CoV-19/Mexico/TAB-InDRE_FB17282_S3775/2021EPI_ISL_2779277 | 09/06/21 | North America / Mexico / Tabasco         | Human | Male   | 37 | Released     | Oropharyngeal swab                 |
| 1CoV-19/Mexico/TAB-InDRE_FB17283_S3776/2021EPI_ISL_2779278 | 09/06/21 | North America / Mexico / Tabasco         | Human | Female | 51 | Released     | Oropharyngeal swab                 |
| 1CoV-19/Mexico/TAB-InDRE_FB17284_S3777/2021EPI_ISL_2779279 | 09/06/21 | North America / Mexico / Tabasco         | Human | Male   | 27 | Released     | Oropharyngeal swab                 |
| 1CoV-19/Mexico/PUE-InDRE_FB17321_S3778/2021EPI_ISL_2779280 | 07/06/21 | North America / Mexico / Puebla          | Human | Male   | 45 | Hospitalized | Oropharyngeal swab                 |
| hCoV-19/Mexico/CMX-INER-IBT-0222/2021 EPI_ISL_2790175      | 08/05/21 | North America / Mexico / Mexico City     | Human | Male   | 27 | Hospitalized |                                    |
| hCoV-19/Mexico/CMX-INER-IBT-0230/2021 EPI_ISL_2790176      | 13/05/21 | North America / Mexico / Mexico City     | Human | Male   | 46 | Hospitalized |                                    |
| 1CoV-19/Mexico/TAB-InDRE_FB17654_S3733/2021EPI_ISL_2800942 | 11/06/21 | North America / Mexico / Tabasco         | Human | Male   | 38 | Released     | Oropharyngeal swab                 |
| hCoV-19/Mexico/CAM-IBT_IMSS_2038/2021 EPI_ISL_2801566      | 31/05/21 | North America / Mexico / Campeche        | Human | Female | 32 | Ambulatory   | Nasopharyngeal and pharyngeal swab |
| hCoV-19/Mexico/TAB-IBT_IMSS_1887/2021 EPI_ISL_2801585      | 03/06/21 | North America / Mexico / Tabasco         | Human | Male   | 35 | Ambulatory   | Nasopharyngeal and pharyngeal swab |
| hCoV-19/Mexico/CAM-IBT_IMSS_2059/2021 EPI_ISL_2801612      | 04/06/21 | North America / Mexico / Campeche        | Human | Female | 35 | Ambulatory   | Nasopharyngeal and pharyngeal swab |
| hCoV-19/Mexico/CAM-IBT_IMSS_2064/2021 EPI_ISL_2801616      | 05/06/21 | North America / Mexico / Campeche        | Human | Male   | 46 | Hospitalized | Nasopharyngeal and pharyngeal swab |
| hCoV-19/Mexico/YUC-IBT_IMSS_10666-NC/2021 EPI_ISL_2801626  | 08/06/21 | North America / Mexico / Yucatan         | Human | Male   | 36 | Hospitalized | Nasopharyngeal swab                |
| hCoV-19/Mexico/TAB-IBT_IMSS_2082/2021 EPI_ISL_2801632      | 06/06/21 | North America / Mexico / Tabasco         | Human | Male   | 56 | Hospitalized | Nasopharyngeal and pharyngeal swab |
| hCoV-19/Mexico/TAB-IBT_IMSS_2083/2021 EPI_ISL_2801633      | 05/06/21 | North America / Mexico / Tabasco         | Human | Female | 41 | Hospitalized | Nasopharyngeal and pharyngeal swab |
| hCoV-19/Mexico/TAB-IBT_IMSS_2084/2021 EPI_ISL_2801634      | 05/06/21 | North America / Mexico / Tabasco         | Human | Male   | 36 | Hospitalized | Nasopharyngeal and pharyngeal swab |
| hCoV-19/Mexico/TAB-IBT_IMSS_2099/2021 EPI_ISL_2801646      | 07/06/21 | North America / Mexico / Tabasco         | Human | Female | 45 | Ambulatory   | Nasopharyngeal and pharyngeal swab |
| hCoV-19/Mexico/TAB-IBT_IMSS_2100/2021 EPI_ISL_2801647      | 08/06/21 | North America / Mexico / Tabasco         | Human | Male   | 45 | Hospitalized | Nasopharyngeal and pharyngeal swab |
| hCoV-19/Mexico/CAM-IBT_IMSS_2104/2021 EPI_ISL_2801651      | 07/06/21 | North America / Mexico / Campeche        | Human | Male   | 27 | Ambulatory   | Nasopharyngeal and pharyngeal swab |
| hCoV-19/Mexico/CAM-IBT_IMSS_2105/2021 EPI_ISL_2801652      | 07/06/21 | North America / Mexico / Campeche        | Human | Female | 36 | Ambulatory   | Nasopharyngeal and pharyngeal swab |
| hCoV-19/Mexico/CHH-IBT_IMSS_1798/2021 EPI_ISL_2801677      | 07/06/21 | North America / Mexico / Chihuahua       | Human | Female | 46 | Ambulatory   | Nasopharyngeal and pharyngeal swab |
| hCoV-19/Mexico/NLE-IBT_IMSS_1811/2021 EPI_ISL_2801688      | 12/06/21 | North America / Mexico / Nuevo Leon      | Human | Female | 87 | Hospitalized | Nasopharyngeal swab                |
| hCoV-19/Mexico/CHH-IBT_IMSS_66166-NC/2021 EPI_ISL_2801693  | 08/06/21 | North America / Mexico / Chihuahua       | Human | Female | 59 | Hospitalized | Nasopharyngeal and pharyngeal swab |
| hCoV-19/Mexico/CHH-IBT_IMSS_66168-NC/2021 EPI_ISL_2801694  | 08/06/21 | North America / Mexico / Chihuahua       | Human | Male   | 55 | Hospitalized | Nasopharyngeal and pharyngeal swab |
| hCoV-19/Mexico/NLE-IBT_IMSS_1817/2021 EPI_ISL_2801695      | 12/06/21 | North America / Mexico / Nuevo Leon      | Human | Male   | 35 | Hospitalized | Nasopharyngeal swab                |
| hCoV-19/Mexico/SLP-IBT_IMSS_1828/2021 EPI_ISL_2801704      | 07/06/21 | North America / Mexico / San Luis Potosi | Human | Female | 19 | Ambulatory   | Nasopharyngeal and pharyngeal swab |
| hCoV-19/Mexico/NAY-IBT_IMSS_1833/2021 EPI_ISL_2801708      | 29/05/21 | North America / Mexico / Nayarit         | Human | Female | 24 | Ambulatory   | Nasopharyngeal and pharyngeal swab |
| hCoV-19/Mexico/MIC-IBT_IMSS_1836/2021 EPI_ISL_2801710      | 30/05/21 | North America / Mexico / Michoacan       | Human | Female | 53 | Hospitalized | Nasopharyngeal and pharyngeal swab |

|                                           |                 |          |                                          |       |        |    |              |                                    |
|-------------------------------------------|-----------------|----------|------------------------------------------|-------|--------|----|--------------|------------------------------------|
| hCoV-19/Mexico/MIC-IBT_IMSS_1843/2021     | EPI_ISL_2801718 | 31/05/21 | North America / Mexico / Michoacan       | Human | Female | 55 | Hospitalized | Nasopharyngeal and pharyngeal swab |
| hCoV-19/Mexico/MIC-IBT_IMSS_1846/2021     | EPI_ISL_2801719 | 31/05/21 | North America / Mexico / Michoacan       | Human | Male   | 53 | Ambulatory   | Nasopharyngeal and pharyngeal swab |
| hCoV-19/Mexico/JAL-IBT_IMSS_1849/2021     | EPI_ISL_2801722 | 02/06/21 | North America / Mexico / Jalisco         | Human | Female | 25 | Ambulatory   | Nasopharyngeal and pharyngeal swab |
| hCoV-19/Mexico/JAL-IBT_IMSS_1855/2021     | EPI_ISL_2801727 | 03/06/21 | North America / Mexico / Jalisco         | Human | Male   | 73 | Hospitalized | Nasopharyngeal and pharyngeal swab |
| hCoV-19/Mexico/SIN-IBT_IMSS_1859/2021     | EPI_ISL_2801730 | 02/06/21 | North America / Mexico / Sinaloa         | Human | Male   | 34 | Ambulatory   | Nasopharyngeal and pharyngeal swab |
| hCoV-19/Mexico/JAL-IBT_IMSS_1869/2021     | EPI_ISL_2801738 | 08/06/21 | North America / Mexico / Jalisco         | Human | Male   | 75 | Ambulatory   | Pharyngeal swab                    |
| hCoV-19/Mexico/MIC-IBT_IMSS_1872/2021     | EPI_ISL_2801740 | 06/06/21 | North America / Mexico / Michoacan       | Human | Female | 55 | Hospitalized | Nasopharyngeal and pharyngeal swab |
| hCoV-19/Mexico/JAL-IBT_IMSS_2109/2021     | EPI_ISL_2801743 | 10/06/21 | North America / Mexico / Jalisco         | Human | Male   | 35 | Ambulatory   | Nasopharyngeal and pharyngeal swab |
| hCoV-19/Mexico/JAL-IBT_IMSS_1878/2021     | EPI_ISL_2801744 | 10/06/21 | North America / Mexico / Jalisco         | Human | Male   | 36 | Hospitalized | Nasopharyngeal and pharyngeal swab |
| hCoV-19/Mexico/JAL-IBT_IMSS_1882/2021     | EPI_ISL_2801748 | 11/06/21 | North America / Mexico / Jalisco         | Human | Male   | 38 | Ambulatory   | Nasopharyngeal and pharyngeal swab |
| hCoV-19/Mexico/MEX-IBT_IMSS_1888/2021     | EPI_ISL_2801754 | 30/05/21 | North America / Mexico / State of Mexico | Human | Female | 55 | Hospitalized | Nasopharyngeal and pharyngeal swab |
| hCoV-19/Mexico/MEX-IBT_IMSS_14933-NC/2021 | EPI_ISL_2801755 | 31/05/21 | North America / Mexico / State of Mexico | Human | Male   | 30 | Ambulatory   | Pharyngeal swab                    |
| hCoV-19/Mexico/VER-IBT_IMSS_14941-NC/2021 | EPI_ISL_2801756 | 28/05/21 | North America / Mexico / Veracruz        | Human | Male   | 49 | Hospitalized | Nasopharyngeal and pharyngeal swab |
| hCoV-19/Mexico/PUE-IBT_IMSS_1890/2021     | EPI_ISL_2801759 | 26/05/21 | North America / Mexico / Puebla          | Human | Male   | 40 | Ambulatory   | Nasopharyngeal and pharyngeal swab |
| hCoV-19/Mexico/VER-IBT_IMSS_1899/2021     | EPI_ISL_2801766 | 27/05/21 | North America / Mexico / Veracruz        | Human | Female | 19 | Ambulatory   | Nasopharyngeal and pharyngeal swab |
| hCoV-19/Mexico/VER-IBT_IMSS_1900/2021     | EPI_ISL_2801767 | 27/05/21 | North America / Mexico / Veracruz        | Human | Female | 49 | Ambulatory   | Nasopharyngeal and pharyngeal swab |
| hCoV-19/Mexico/MEX-IBT_IMSS_1906/2021     | EPI_ISL_2801770 | 01/06/21 | North America / Mexico / State of Mexico | Human | Male   | 51 | Hospitalized | Nasopharyngeal and pharyngeal swab |
| hCoV-19/Mexico/CMX-IBT_IMSS_15240-NC/2021 | EPI_ISL_2801771 | 01/06/21 | North America / Mexico / Mexico City     | Human | Female | 4  | Ambulatory   | Nasopharyngeal and pharyngeal swab |
| hCoV-19/Mexico/CMX-IBT_IMSS_1918/2021     | EPI_ISL_2801782 | 31/05/21 | North America / Mexico / Mexico City     | Human | Female | 30 | Hospitalized | Nasopharyngeal and pharyngeal swab |
| hCoV-19/Mexico/CMX-IBT_IMSS_1919/2021     | EPI_ISL_2801783 | 01/06/21 | North America / Mexico / Mexico City     | Human | Male   | 33 | Ambulatory   | Nasopharyngeal and pharyngeal swab |
| hCoV-19/Mexico/MEX-IBT_IMSS_15765-NC/2021 | EPI_ISL_2801790 | 02/06/21 | North America / Mexico / State of Mexico | Human | Female | 65 | Hospitalized | Nasopharyngeal and pharyngeal swab |
| hCoV-19/Mexico/MOR-IBT_IMSS_15905-NC/2021 | EPI_ISL_2801791 | 01/06/21 | North America / Mexico / Morelos         | Human | Female | 59 | Hospitalized | Nasopharyngeal and pharyngeal swab |
| hCoV-19/Mexico/VER-IBT_IMSS_1926/2021     | EPI_ISL_2801792 | 01/06/21 | North America / Mexico / Veracruz        | Human | Male   | 29 | Ambulatory   | Nasopharyngeal and pharyngeal swab |
| hCoV-19/Mexico/MOR-IBT_IMSS_1927/2021     | EPI_ISL_2801793 | 01/06/21 | North America / Mexico / Morelos         | Human | Female | 59 | Hospitalized | Nasopharyngeal and pharyngeal swab |
| hCoV-19/Mexico/MOR-IBT_IMSS_1928/2021     | EPI_ISL_2801794 | 01/06/21 | North America / Mexico / Morelos         | Human | Male   | 48 | Hospitalized | Nasopharyngeal and pharyngeal swab |
| hCoV-19/Mexico/MEX-IBT_IMSS_1933/2021     | EPI_ISL_2801798 | 01/06/21 | North America / Mexico / State of Mexico | Human | Male   | 26 | Ambulatory   | Nasopharyngeal and pharyngeal swab |
| hCoV-19/Mexico/MEX-IBT_IMSS_1935/2021     | EPI_ISL_2801800 | 01/06/21 | North America / Mexico / State of Mexico | Human | Female | 46 | Hospitalized | Nasopharyngeal and pharyngeal swab |
| hCoV-19/Mexico/PUE-IBT_IMSS_1945/2021     | EPI_ISL_2801807 | 01/06/21 | North America / Mexico / Puebla          | Human | Male   | 57 | Ambulatory   | Nasopharyngeal swab                |
| hCoV-19/Mexico/CMX-IBT_IMSS_1946/2021     | EPI_ISL_2801808 | 04/06/21 | North America / Mexico / Mexico City     | Human | Male   | 67 | Hospitalized | Nasopharyngeal swab                |
| hCoV-19/Mexico/VER-IBT_IMSS_1978/2021     | EPI_ISL_2801835 | 04/06/21 | North America / Mexico / Veracruz        | Human | Male   | 62 | Hospitalized | Nasopharyngeal and pharyngeal swab |
| hCoV-19/Mexico/VER-IBT_IMSS_16436-NC/2021 | EPI_ISL_2801836 | 03/06/21 | North America / Mexico / Veracruz        | Human | Male   | 70 | Hospitalized | Nasopharyngeal and pharyngeal swab |
| hCoV-19/Mexico/VER-IBT_IMSS_1982/2021     | EPI_ISL_2801839 | 03/06/21 | North America / Mexico / Veracruz        | Human | Female | 41 | Ambulatory   | Nasopharyngeal and pharyngeal swab |
| hCoV-19/Mexico/QUE-IBT_IMSS_1987/2021     | EPI_ISL_2801845 | 03/06/21 | North America / Mexico / Queretaro       | Human | Male   | 48 | Ambulatory   | Nasopharyngeal and pharyngeal swab |
| hCoV-19/Mexico/VER-IBT_IMSS_2000/2021     | EPI_ISL_2801852 | 04/06/21 | North America / Mexico / Veracruz        | Human | Male   | 42 | Ambulatory   | Nasopharyngeal and pharyngeal swab |
| hCoV-19/Mexico/OAX-IBT_IMSS_2003/2021     | EPI_ISL_2801855 | 05/06/21 | North America / Mexico / Oaxaca          | Human | Female | 45 | Ambulatory   | Nasopharyngeal and pharyngeal swab |
| hCoV-19/Mexico/HID-IBT_IMSS_17632-NC/2021 | EPI_ISL_2801859 | 08/06/21 | North America / Mexico / Hidalgo         | Human | Female | 41 | Hospitalized | Pharyngeal swab                    |
| hCoV-19/Mexico/VER-IBT_IMSS_2014/2021     | EPI_ISL_2801864 | 07/06/21 | North America / Mexico / Veracruz        | Human | Female | 28 | Ambulatory   | Nasopharyngeal and pharyngeal swab |
| hCoV-19/Mexico/VER-IBT_IMSS_2015/2021     | EPI_ISL_2801865 | 04/06/21 | North America / Mexico / Veracruz        | Human | Male   | 30 | Ambulatory   | Nasopharyngeal and pharyngeal swab |
| hCoV-19/Mexico/VER-IBT_IMSS_2017/2021     | EPI_ISL_2801866 | 04/06/21 | North America / Mexico / Veracruz        | Human | Female | 24 | Ambulatory   | Nasopharyngeal and pharyngeal swab |
| hCoV-19/Mexico/PUE-IBT_IMSS_2020/2021     | EPI_ISL_2801868 | 07/06/21 | North America / Mexico / Puebla          | Human | Male   | 26 | Hospitalized | Nasopharyngeal and pharyngeal swab |
| hCoV-19/Mexico/GRO-IBT_IMSS_2024/2021     | EPI_ISL_2801871 | 07/06/21 | North America / Mexico / Guerrero        | Human | Male   | 45 | Ambulatory   | Nasopharyngeal and pharyngeal swab |
| hCoV-19/Mexico/MOR-IBT_IMSS_2028/2021     | EPI_ISL_2801873 | 08/06/21 | North America / Mexico / Morelos         | Human | Female | 33 | Hospitalized | Nasopharyngeal and pharyngeal swab |
| hCoV-19/Mexico/PUE-IBT_IMSS_2029/2021     | EPI_ISL_2801874 | 08/06/21 | North America / Mexico / Puebla          | Human | Male   | 43 | Hospitalized | Nasopharyngeal and pharyngeal swab |
| hCoV-19/Mexico/PUE-IBT_IMSS_2034/2021     | EPI_ISL_2801879 | 09/06/21 | North America / Mexico / Puebla          | Human | Female | 64 | Hospitalized | Nasopharyngeal and pharyngeal swab |

|                                             |                 |          |                                                    |       |         |              |                             |                                    |
|---------------------------------------------|-----------------|----------|----------------------------------------------------|-------|---------|--------------|-----------------------------|------------------------------------|
| hCoV-19/Mexico/GRO-IBT_IMSS_2037/2021       | EPI_ISL_2801882 | 10/06/21 | North America / Mexico / Guerrero                  | Human | Female  | 47           | Ambulatory                  | Nasopharyngeal and pharyngeal swab |
| hCoV-19/Mexico/PUE-IBT_IMSS_2041/2021       | EPI_ISL_2801885 | 09/06/21 | North America / Mexico / Puebla                    | Human | Female  | 26           | Ambulatory                  | Nasopharyngeal and pharyngeal swab |
| hCoV-19/Mexico/VER-IBT_IMSS_2044/2021       | EPI_ISL_2801888 | 09/06/21 | North America / Mexico / Veracruz                  | Human | Female  | 50           | Hospitalized                | Nasopharyngeal and pharyngeal swab |
| hCoV-19/Mexico/HID-IBT_IMSS_2047/2021       | EPI_ISL_2801891 | 11/06/21 | North America / Mexico / Hidalgo                   | Human | Male    | 40           | Ambulatory                  | Nasopharyngeal and pharyngeal swab |
| hCoV-19/Mexico/MEX-INMEGEN-06-03-37/2021    | EPI_ISL_2810054 | 24/06/21 | North America / Mexico / State of Mexico           | Human | Female  | 36           | unknown                     | Oropharyngeal swab                 |
| hCoV-19/Mexico/MEX-INMEGEN-06-03-55/2021    | EPI_ISL_2810067 | 24/06/21 | North America / Mexico / State of Mexico           | Human | Male    | 21           | unknown                     | Oropharyngeal swab                 |
| hCoV-19/Mexico/CMX-INMEGEN-06-03-100/2021   | EPI_ISL_2810100 | 31/05/21 | North America / Mexico / Mexico City               | Human | Female  | 53           | unknown                     | Oropharyngeal swab                 |
| hCoV-19/Mexico/CMX-INMEGEN-06-03-112/2021   | EPI_ISL_2810108 | 03/06/21 | North America / Mexico / Mexico City               | Human | Male    | 30           | unknown                     | Oropharyngeal swab                 |
| hCoV-19/Mexico/CMX-INMEGEN-06-03-113/2021   | EPI_ISL_2810109 | 16/06/21 | North America / Mexico / Mexico City               | Human | Female  | 73           | unknown                     | Oropharyngeal swab                 |
| hCoV-19/Mexico/CMX-INMEGEN-06-03-120/2021   | EPI_ISL_2810115 | 03/06/21 | North America / Mexico / Mexico City               | Human | Female  | 27           | unknown                     | Oropharyngeal swab                 |
| hCoV-19/Mexico/CMX-INMEGEN-06-03-130/2021   | EPI_ISL_2810122 | 04/06/21 | North America / Mexico / Mexico City               | Human | Male    | 24           | unknown                     | Oropharyngeal swab                 |
| hCoV-19/Mexico/CMX-INMEGEN-06-03-143/2021   | EPI_ISL_2810133 | 03/06/21 | North America / Mexico / Mexico City               | Human | Male    | 40           | unknown                     | Oropharyngeal swab                 |
| hCoV-19/Mexico/MEX-INMEGEN-06-03-151/2021   | EPI_ISL_2810141 | 03/06/21 | North America / Mexico / State of Mexico           | Human | Female  | 37           | unknown                     | Oropharyngeal swab                 |
| hCoV-19/Mexico/CMX-INMEGEN-06-03-170/2021   | EPI_ISL_2810156 | 04/06/21 | North America / Mexico / Mexico City               | Human | Female  | 53           | unknown                     | Oropharyngeal swab                 |
| hCoV-19/Mexico/MEX-INMEGEN-06-03-171/2021   | EPI_ISL_2810157 | 04/06/21 | North America / Mexico / State of Mexico           | Human | Female  | 36           | unknown                     | Oropharyngeal swab                 |
| hCoV-19/Mexico/MEX-INMEGEN-06-03-176/2021   | EPI_ISL_2810161 | 03/06/21 | North America / Mexico / State of Mexico           | Human | Female  | 49           | unknown                     | Oropharyngeal swab                 |
| hCoV-19/Mexico/CMX-INMEGEN-06-03-213/2021   | EPI_ISL_2810188 | 20/06/21 | North America / Mexico / Mexico City               | Human | Female  | 40           | unknown                     | Oropharyngeal swab                 |
| hCoV-19/Mexico/TAB-INMEGEN-06-03-297/2021   | EPI_ISL_2810259 | 09/06/21 | North America / Mexico / Tabasco                   | Human | Male    | 60           | unknown                     | Oropharyngeal swab                 |
| hCoV-19/Mexico/CMX-INMEGEN-06-03-303/2021   | EPI_ISL_2810263 | 09/06/21 | North America / Mexico / Mexico City               | Human | Female  | 45           | unknown                     | Oropharyngeal swab                 |
| hCoV-19/Mexico/CMX-INMEGEN-06-03-317/2021   | EPI_ISL_2810275 | 23/06/21 | North America / Mexico / Mexico City               | Human | Female  | 33           | unknown                     | Oropharyngeal swab                 |
| hCoV-19/Mexico/TAB-INMEGEN-06-03-329/2021   | EPI_ISL_2810288 | 09/06/21 | North America / Mexico / Tabasco                   | Human | Female  | 34           | unknown                     | Oropharyngeal swab                 |
| hCoV-19/Mexico/TAM-INMEGEN-06-03-337/2021   | EPI_ISL_2810293 | 09/06/21 | North America / Mexico / Tamaulipas                | Human | Male    | 37           | unknown                     | Oropharyngeal swab                 |
| hCoV-19/Mexico/TAM-INMEGEN-06-03-353/2021   | EPI_ISL_2810306 | 09/06/21 | North America / Mexico / Tamaulipas                | Human | Male    | 31           | unknown                     | Oropharyngeal swab                 |
| hCoV-19/Mexico/CMX-INMEGEN-06-03-363/2021   | EPI_ISL_2810314 | 23/06/21 | North America / Mexico / Mexico City               | Human | Male    | 73           | unknown                     | Oropharyngeal swab                 |
| hCoV-19/Mexico/CMX-InDRE_FB17893_S3841/2021 | EPI_ISL_2835050 | 2021-06  | North America / Mexico / Mexico City               | Human | Female  | 81           | unknown                     | Oro-pharyngeal swab                |
| hCoV-19/Mexico/CMX-InDRE_FB17967_S3844/2021 | EPI_ISL_2835053 | 01/06/21 | North America / Mexico / Mexico City               | Human | Female  | 64           | Released                    | Oro-pharyngeal swab                |
| hCoV-19/Mexico/CHH-InDRE_FB16988_S3848/2021 | EPI_ISL_2835055 | 25/05/21 | North America / Mexico / Chihuahua                 | Human | Female  | 58           | Deceased                    | Oro-pharyngeal swab                |
| hCoV-19/Mexico/TAB-InDRE_FB17989_S3851/2021 | EPI_ISL_2835058 | 16/06/21 | North America / Mexico / Tabasco                   | Human | Female  | 67           | Released                    | Oro-pharyngeal swab                |
| hCoV-19/Mexico/TAB-InDRE_FB18000_S3853/2021 | EPI_ISL_2835060 | 16/06/21 | North America / Mexico / Tabasco                   | Human | Male    | 42           | Released                    | Oro-pharyngeal swab                |
| hCoV-19/Mexico/TAB-InDRE_FB18002_S3854/2021 | EPI_ISL_2835061 | 17/06/21 | North America / Mexico / Tabasco                   | Human | Female  | 36           | Released                    | Oro-pharyngeal swab                |
| hCoV-19/Mexico/TAB-InDRE_FB18026_S3857/2021 | EPI_ISL_2835064 | 17/06/21 | North America / Mexico / Tabasco                   | Human | Female  | 64           | Released                    | Oro-pharyngeal swab                |
| hCoV-19/Mexico/TAB-InDRE_FB18036_S3860/2021 | EPI_ISL_2835065 | 18/06/21 | North America / Mexico / Tabasco                   | Human | Female  | 39           | Released                    | Oro-pharyngeal swab                |
| hCoV-19/Mexico/TAB-InDRE_FB18041_S3862/2021 | EPI_ISL_2835066 | 18/06/21 | North America / Mexico / Tabasco                   | Human | Male    | 59           | Released                    | Oro-pharyngeal swab                |
| hCoV-19/Mexico/TAB-InDRE_FB18043_S3863/2021 | EPI_ISL_2835067 | 18/06/21 | North America / Mexico / Tabasco                   | Human | Female  | 48           | Released                    | Oro-pharyngeal swab                |
| hCoV-19/Mexico/TAB-InDRE_FB18055_S3864/2021 | EPI_ISL_2835068 | 19/06/21 | North America / Mexico / Tabasco                   | Human | Female  | 30           | Released                    | Oro-pharyngeal swab                |
| hCoV-19/Mexico/TAB-InDRE_FB18187_S3872/2021 | EPI_ISL_2835070 | 21/06/21 | North America / Mexico / Tabasco                   | Human | Female  | 44           | Released                    | Oro-pharyngeal swab                |
| hCoV-19/Mexico/BCN-SEARCH-103120/2021       | EPI_ISL_2835545 | 21/01/21 | North America / Mexico / Baja California / Tijuana | Human | unknown | unknown      | Nasal swab                  |                                    |
| hCoV-19/Mexico/CHH_INER_IMSS_1063/2021      | EPI_ISL_2835920 | 04/05/21 | North America / Mexico / Chihuahua                 | Human | 41      | hospitalized | real and oropharyngeal swab |                                    |
| hCoV-19/Mexico/COA_INER_IMSS_1097/2021      | EPI_ISL_2835926 | 09/05/21 | North America / Mexico / Coahuila                  | Human | 61      | Ambulatory   | real and oropharyngeal swab |                                    |
| hCoV-19/Mexico/COL_INER_IMSS_1172/2021      | EPI_ISL_2835935 | 07/05/21 | North America / Mexico / Colima                    | Human | 23      | Ambulatory   | real and oropharyngeal swab |                                    |
| hCoV-19/Mexico/CMX_INER_IMSS_1292/2021      | EPI_ISL_2835947 | 11/05/21 | North America / Mexico / Mexico City               | Human | 38      | Ambulatory   | real and oropharyngeal swab |                                    |
| hCoV-19/Mexico/CMX-INMEGEN-04-07-275/2021   | EPI_ISL_2842787 | 27/04/21 | North America / Mexico / Mexico City               | Human | Male    | 49           | unknown                     | Oro-pharyngeal swab                |
| hCoV-19/Mexico/CMX-INMEGEN-04-07-278/2021   | EPI_ISL_2842788 | 27/04/21 | North America / Mexico / Mexico City               | Human | Female  | 24           | unknown                     | Oro-pharyngeal swab                |
| hCoV-19/Mexico/CMX-INMEGEN-04-07-279/2021   | EPI_ISL_2842789 | 28/04/21 | North America / Mexico / Mexico City               | Human | Male    | 35           | unknown                     | Oro-pharyngeal swab                |

|                                             |                 |          |                                      |       |        |    |          |                     |
|---------------------------------------------|-----------------|----------|--------------------------------------|-------|--------|----|----------|---------------------|
| hCoV-19/Mexico/CMX-INMEGEN-04-07-276/2021   | EPI_ISL_2842790 | 27/04/21 | North America / Mexico / Mexico City | Human | Male   | 47 | unknown  | Oro-pharyngeal swab |
| hCoV-19/Mexico/CMX-INMEGEN-04-07-277/2021   | EPI_ISL_2842791 | 28/04/21 | North America / Mexico / Mexico City | Human | Female | 34 | unknown  | Oro-pharyngeal swab |
| hCoV-19/Mexico/CMX-INMEGEN-05-01-197/2021   | EPI_ISL_2842793 | 29/01/21 | North America / Mexico / Mexico City | Human | Male   | 35 | unknown  | Oro-pharyngeal swab |
| hCoV-19/Mexico/CMX-INMEGEN-05-01-198/2021   | EPI_ISL_2842794 | 13/04/21 | North America / Mexico / Mexico City | Human | Female | 27 | unknown  | Oro-pharyngeal swab |
| hCoV-19/Mexico/CMX-INMEGEN-05-01-199/2021   | EPI_ISL_2842795 | 08/04/21 | North America / Mexico / Mexico City | Human | Male   | 32 | unknown  | Oro-pharyngeal swab |
| hCoV-19/Mexico/CMX-INMEGEN-05-01-202/2021   | EPI_ISL_2842798 | 25/02/21 | North America / Mexico / Mexico City | Human | Female | 47 | unknown  | Oro-pharyngeal swab |
| hCoV-19/Mexico/YUC-INDRE_FB17452_S4049/2021 | EPI_ISL_2859063 | 14/06/21 | North America / Mexico / Yucatan     | Human | Female | 30 | Released | Oropharyngeal swab  |
| hCoV-19/Mexico/MIC-INDRE_FB17623_S4050/2021 | EPI_ISL_2859064 | 11/06/21 | North America / Mexico / Michoacan   | Human | Female | 22 | unknown  | Oropharyngeal swab  |
| hCoV-19/Mexico/MIC-INDRE_FB17625_S4051/2021 | EPI_ISL_2859065 | 10/06/21 | North America / Mexico / Michoacan   | Human | Male   | 64 | Deceased | Oropharyngeal swab  |
| hCoV-19/Mexico/CMX-INDRE_FB17894_S4052/2021 | EPI_ISL_2859066 | 2021-06  | North America / Mexico / Mexico City | Human | Male   | 86 | unknown  | Oropharyngeal swab  |
| hCoV-19/Mexico/CMX-INDRE_FB17895_S4053/2021 | EPI_ISL_2859067 | 2021-06  | North America / Mexico / Mexico City | Human | Male   | 78 | unknown  | Oropharyngeal swab  |
| hCoV-19/Mexico/CMX-INDRE_FB17896_S4054/2021 | EPI_ISL_2859068 | 2021-06  | North America / Mexico / Mexico City | Human | Male   | 72 | unknown  | Oropharyngeal swab  |
| hCoV-19/Mexico/CMX-INDRE_FB17897_S4055/2021 | EPI_ISL_2859069 | 2021-06  | North America / Mexico / Mexico City | Human | Male   | 63 | unknown  | Oropharyngeal swab  |
| hCoV-19/Mexico/CMX-INDRE_FB17899_S4056/2021 | EPI_ISL_2859070 | 2021-06  | North America / Mexico / Mexico City | Human | Male   | 88 | unknown  | Oropharyngeal swab  |
| hCoV-19/Mexico/CMX-INDRE_FB17951_S4057/2021 | EPI_ISL_2859071 | 03/06/21 | North America / Mexico / Mexico City | Human | Female | 62 | Released | Oropharyngeal swab  |
| hCoV-19/Mexico/CMX-INDRE_FB17961_S4058/2021 | EPI_ISL_2859072 | 26/05/21 | North America / Mexico / Mexico City | Human | Male   | 57 | Released | Oropharyngeal swab  |
| hCoV-19/Mexico/CMX-INDRE_FB17963_S4059/2021 | EPI_ISL_2859073 | 28/05/21 | North America / Mexico / Mexico City | Human | Female | 21 | Released | Oropharyngeal swab  |
| hCoV-19/Mexico/CMX-INDRE_FB17965_S4060/2021 | EPI_ISL_2859074 | 02/06/21 | North America / Mexico / Mexico City | Human | Male   | 24 | Released | Oropharyngeal swab  |
| hCoV-19/Mexico/CMX-INDRE_FB17972_S4061/2021 | EPI_ISL_2859075 | 09/06/21 | North America / Mexico / Mexico City | Human | Female | 61 | Released | Oropharyngeal swab  |
| hCoV-19/Mexico/CHH-INDRE_FB16987_S4062/2021 | EPI_ISL_2859076 | 22/05/21 | North America / Mexico / Chihuahua   | Human | Female | 40 | Released | Oropharyngeal swab  |
| hCoV-19/Mexico/TAB-INDRE_FB17980_S4063/2021 | EPI_ISL_2859077 | 16/06/21 | North America / Mexico / Tabasco     | Human | Male   | 34 | Released | Oropharyngeal swab  |
| hCoV-19/Mexico/TAB-INDRE_FB17981_S4064/2021 | EPI_ISL_2859078 | 16/06/21 | North America / Mexico / Tabasco     | Human | Male   | 57 | Released | Oropharyngeal swab  |
| hCoV-19/Mexico/TAB-INDRE_FB17982_S4065/2021 | EPI_ISL_2859079 | 16/06/21 | North America / Mexico / Tabasco     | Human | Female | 46 | Released | Oropharyngeal swab  |
| hCoV-19/Mexico/TAB-INDRE_FB17983_S4066/2021 | EPI_ISL_2859080 | 16/06/21 | North America / Mexico / Tabasco     | Human | Female | 33 | Released | Oropharyngeal swab  |
| hCoV-19/Mexico/TAB-INDRE_FB17986_S4067/2021 | EPI_ISL_2859081 | 16/06/21 | North America / Mexico / Tabasco     | Human | Male   | 42 | Released | Oropharyngeal swab  |
| hCoV-19/Mexico/TAB-INDRE_FB17987_S4068/2021 | EPI_ISL_2859082 | 16/06/21 | North America / Mexico / Tabasco     | Human | Male   | 40 | Released | Oropharyngeal swab  |
| hCoV-19/Mexico/TAB-INDRE_FB17988_S4069/2021 | EPI_ISL_2859083 | 16/06/21 | North America / Mexico / Tabasco     | Human | Female | 42 | Released | Oropharyngeal swab  |
| hCoV-19/Mexico/TAB-INDRE_FB17992_S4070/2021 | EPI_ISL_2859084 | 16/06/21 | North America / Mexico / Tabasco     | Human | Female | 69 | Released | Oropharyngeal swab  |
| hCoV-19/Mexico/TAB-INDRE_FB17993_S4071/2021 | EPI_ISL_2859085 | 16/06/21 | North America / Mexico / Tabasco     | Human | Male   | 55 | Released | Oropharyngeal swab  |
| hCoV-19/Mexico/TAB-INDRE_FB18006_S4072/2021 | EPI_ISL_2859086 | 17/06/21 | North America / Mexico / Tabasco     | Human | Male   | 41 | Released | Oropharyngeal swab  |
| hCoV-19/Mexico/TAB-INDRE_FB18010_S4073/2021 | EPI_ISL_2859087 | 17/06/21 | North America / Mexico / Tabasco     | Human | Male   | 18 | Released | Oropharyngeal swab  |
| hCoV-19/Mexico/TAB-INDRE_FB18012_S4074/2021 | EPI_ISL_2859088 | 17/06/21 | North America / Mexico / Tabasco     | Human | Female | 43 | Released | Oropharyngeal swab  |
| hCoV-19/Mexico/TAB-INDRE_FB18013_S4075/2021 | EPI_ISL_2859089 | 17/06/21 | North America / Mexico / Tabasco     | Human | Male   | 72 | Released | Oropharyngeal swab  |
| hCoV-19/Mexico/TAB-INDRE_FB18014_S4076/2021 | EPI_ISL_2859090 | 16/06/21 | North America / Mexico / Tabasco     | Human | Male   | 46 | Released | Oropharyngeal swab  |
| hCoV-19/Mexico/TAB-INDRE_FB18038_S4077/2021 | EPI_ISL_2859091 | 18/06/21 | North America / Mexico / Tabasco     | Human | Female | 28 | Released | Oropharyngeal swab  |
| hCoV-19/Mexico/TAB-INDRE_FB18042_S4078/2021 | EPI_ISL_2859092 | 18/06/21 | North America / Mexico / Tabasco     | Human | Female | 55 | Released | Oropharyngeal swab  |
| hCoV-19/Mexico/TAB-INDRE_FB18044_S4079/2021 | EPI_ISL_2859093 | 18/06/21 | North America / Mexico / Tabasco     | Human | Female | 42 | Released | Oropharyngeal swab  |
| hCoV-19/Mexico/TAB-INDRE_FB18045_S4080/2021 | EPI_ISL_2859094 | 18/06/21 | North America / Mexico / Tabasco     | Human | Male   | 53 | Released | Oropharyngeal swab  |
| hCoV-19/Mexico/TAB-INDRE_FB18046_S4081/2021 | EPI_ISL_2859095 | 18/06/21 | North America / Mexico / Tabasco     | Human | Male   | 47 | Released | Oropharyngeal swab  |
| hCoV-19/Mexico/TAB-INDRE_FB18047_S4082/2021 | EPI_ISL_2859096 | 19/06/21 | North America / Mexico / Tabasco     | Human | Male   | 49 | Released | Oropharyngeal swab  |
| hCoV-19/Mexico/TAB-INDRE_FB18048_S4083/2021 | EPI_ISL_2859097 | 19/06/21 | North America / Mexico / Tabasco     | Human | Female | 82 | Released | Oropharyngeal swab  |
| hCoV-19/Mexico/TAB-INDRE_FB18049_S4084/2021 | EPI_ISL_2859098 | 19/06/21 | North America / Mexico / Tabasco     | Human | Male   | 55 | Released | Oropharyngeal swab  |
| hCoV-19/Mexico/TAB-INDRE_FB18050_S4085/2021 | EPI_ISL_2859099 | 19/06/21 | North America / Mexico / Tabasco     | Human | Female | 31 | Released | Oropharyngeal swab  |
| hCoV-19/Mexico/TAB-INDRE_FB18053_S4086/2021 | EPI_ISL_2859100 | 19/06/21 | North America / Mexico / Tabasco     | Human | Female | 25 | Released | Oropharyngeal swab  |

|                                                            |          |                                          |       |        |    |              |                    |
|------------------------------------------------------------|----------|------------------------------------------|-------|--------|----|--------------|--------------------|
| 1CoV-19/Mexico/TAB-InDRE_FB18054_S4087/2021EPI_ISL_2859101 | 19/06/21 | North America / Mexico / Tabasco         | Human | Female | 45 | Released     | Oropharyngeal swab |
| 1CoV-19/Mexico/TAB-InDRE_FB18057_S4088/2021EPI_ISL_2859102 | 17/06/21 | North America / Mexico / Tabasco         | Human | Female | 71 | Released     | Oropharyngeal swab |
| 1CoV-19/Mexico/TAB-InDRE_FB18058_S4089/2021EPI_ISL_2859103 | 19/06/21 | North America / Mexico / Tabasco         | Human | Female | 50 | Released     | Oropharyngeal swab |
| 1CoV-19/Mexico/TAB-InDRE_FB18059_S4090/2021EPI_ISL_2859104 | 20/06/21 | North America / Mexico / Tabasco         | Human | Female | 41 | Released     | Oropharyngeal swab |
| 1CoV-19/Mexico/TAB-InDRE_FB18060_S4091/2021EPI_ISL_2859105 | 20/06/21 | North America / Mexico / Tabasco         | Human | Male   | 64 | Released     | Oropharyngeal swab |
| 1CoV-19/Mexico/TAB-InDRE_FB18061_S4092/2021EPI_ISL_2859106 | 20/06/21 | North America / Mexico / Tabasco         | Human | Male   | 46 | Released     | Oropharyngeal swab |
| hCoV-19/Mexico/JAL-InDRE_FB18066_S4093/2021EPI_ISL_2859107 | 17/06/21 | North America / Mexico / Jalisco         | Human | Male   | 68 | Hospitalized | Oropharyngeal swab |
| 1CoV-19/Mexico/SLP-InDRE_FB18076_S4094/2021EPI_ISL_2859108 | 17/06/21 | North America / Mexico / San Luis Potosi | Human | Female | 45 | Released     | Oropharyngeal swab |
| 1CoV-19/Mexico/TAB-InDRE_FB18174_S4095/2021EPI_ISL_2859109 | 21/06/21 | North America / Mexico / Tabasco         | Human | Female | 31 | Released     | Oropharyngeal swab |
| 1CoV-19/Mexico/TAB-InDRE_FB18177_S4096/2021EPI_ISL_2859110 | 21/06/21 | North America / Mexico / Tabasco         | Human | Female | 53 | Released     | Oropharyngeal swab |
| 1CoV-19/Mexico/TAB-InDRE_FB18178_S4097/2021EPI_ISL_2859111 | 21/06/21 | North America / Mexico / Tabasco         | Human | Female | 45 | Released     | Oropharyngeal swab |
| 1CoV-19/Mexico/TAB-InDRE_FB18181_S4098/2021EPI_ISL_2859112 | 21/06/21 | North America / Mexico / Tabasco         | Human | Male   | 30 | Released     | Oropharyngeal swab |
| 1CoV-19/Mexico/TAB-InDRE_FB18183_S4099/2021EPI_ISL_2859113 | 21/06/21 | North America / Mexico / Tabasco         | Human | Female | 56 | Released     | Oropharyngeal swab |
| 1CoV-19/Mexico/TAB-InDRE_FB18184_S4100/2021EPI_ISL_2859114 | 21/06/21 | North America / Mexico / Tabasco         | Human | Female | 35 | Released     | Oropharyngeal swab |
| 1CoV-19/Mexico/TAB-InDRE_FB18186_S4101/2021EPI_ISL_2859115 | 21/06/21 | North America / Mexico / Tabasco         | Human | Male   | 64 | Released     | Oropharyngeal swab |
| 1CoV-19/Mexico/TAB-InDRE_FB18196_S4102/2021EPI_ISL_2859116 | 21/06/21 | North America / Mexico / Tabasco         | Human | Male   | 23 | Released     | Oropharyngeal swab |
| 1CoV-19/Mexico/TAB-InDRE_FB18200_S4103/2021EPI_ISL_2859117 | 21/06/21 | North America / Mexico / Tabasco         | Human | Female | 53 | Released     | Oropharyngeal swab |
| 1CoV-19/Mexico/TAB-InDRE_FB18201_S4104/2021EPI_ISL_2859118 | 18/06/21 | North America / Mexico / Tabasco         | Human | Male   | 17 | Released     | Oropharyngeal swab |
| 1CoV-19/Mexico/TAB-InDRE_FB18208_S4105/2021EPI_ISL_2859119 | 21/06/21 | North America / Mexico / Tabasco         | Human | Female | 49 | Released     | Oropharyngeal swab |
| 1CoV-19/Mexico/TAB-InDRE_FB18210_S4106/2021EPI_ISL_2859120 | 21/06/21 | North America / Mexico / Tabasco         | Human | Female | 44 | Released     | Oropharyngeal swab |
| 1CoV-19/Mexico/NLE-InDRE_FB18316_S4107/2021EPI_ISL_2859121 | 05/06/21 | North America / Mexico / Nuevo Leon      | Human | Male   | 33 | Released     | Oropharyngeal swab |
| 1CoV-19/Mexico/TAB-InDRE_FB18319_S4108/2021EPI_ISL_2859122 | 21/06/21 | North America / Mexico / Tabasco         | Human | Female | 41 | Released     | Oropharyngeal swab |
| 1CoV-19/Mexico/TAB-InDRE_FB18320_S4109/2021EPI_ISL_2859123 | 21/06/21 | North America / Mexico / Tabasco         | Human | Female | 49 | Released     | Oropharyngeal swab |
| 1CoV-19/Mexico/TAB-InDRE_FB18327_S4110/2021EPI_ISL_2859124 | 22/06/21 | North America / Mexico / Tabasco         | Human | Male   | 54 | Released     | Oropharyngeal swab |
| 1CoV-19/Mexico/TAB-InDRE_FB18329_S4111/2021EPI_ISL_2859125 | 22/06/21 | North America / Mexico / Tabasco         | Human | Male   | 45 | Released     | Oropharyngeal swab |
| hCoV-19/Mexico/CMX-INMEGEN-05-01-20/2021 EPI_ISL_2881721   | 11/03/21 | North America / Mexico / Mexico City     | Human | Male   | 26 | unknown      |                    |
| hCoV-19/Mexico/CMX-INMEGEN-05-01-24/2021 EPI_ISL_2881722   | 23/03/21 | North America / Mexico / Mexico City     | Human | Female | 44 | unknown      |                    |
| hCoV-19/Mexico/CMX-INMEGEN-05-01-38/2021 EPI_ISL_2881723   | 30/04/21 | North America / Mexico / Mexico City     | Human | Male   | 58 | unknown      |                    |
| hCoV-19/Mexico/CMX-INMEGEN-05-01-40/2021 EPI_ISL_2881724   | 03/05/21 | North America / Mexico / Mexico City     | Human | Male   | 42 | unknown      |                    |
| hCoV-19/Mexico/CMX-INMEGEN-05-01-45/2021 EPI_ISL_2881725   | 03/05/21 | North America / Mexico / Mexico City     | Human | Male   | 55 | unknown      |                    |
| hCoV-19/Mexico/CMX-INMEGEN-05-01-48/2021 EPI_ISL_2881726   | 03/05/21 | North America / Mexico / Mexico City     | Human | Female | 54 | unknown      |                    |
| hCoV-19/Mexico/CMX-INMEGEN-05-01-50/2021 EPI_ISL_2881727   | 03/05/21 | North America / Mexico / Mexico City     | Human | Female | 49 | unknown      |                    |
| hCoV-19/Mexico/CMX-INMEGEN-05-01-59/2021 EPI_ISL_2881728   | 04/05/21 | North America / Mexico / Mexico City     | Human | Female | 50 | unknown      |                    |
| hCoV-19/Mexico/CMX-INMEGEN-05-01-76/2021 EPI_ISL_2881729   | 04/05/21 | North America / Mexico / Mexico City     | Human | Female | 37 | unknown      |                    |
| hCoV-19/Mexico/CMX-INMEGEN-05-01-78/2021 EPI_ISL_2881730   | 04/05/21 | North America / Mexico / Mexico City     | Human | Female | 47 | unknown      |                    |
| hCoV-19/Mexico/CMX-INMEGEN-05-01-82/2021 EPI_ISL_2881731   | 04/05/21 | North America / Mexico / Mexico City     | Human | Female | 51 | unknown      |                    |
| hCoV-19/Mexico/CMX-INMEGEN-05-01-84/2021 EPI_ISL_2881732   | 06/05/21 | North America / Mexico / Mexico City     | Human | Male   | 38 | unknown      |                    |
| hCoV-19/Mexico/CMX-INMEGEN-05-01-89/2021 EPI_ISL_2881733   | 06/05/21 | North America / Mexico / Mexico City     | Human | Female | 49 | unknown      |                    |
| hCoV-19/Mexico/CMX-INMEGEN-05-01-120/2021 EPI_ISL_2881734  | 28/04/21 | North America / Mexico / Mexico City     | Human | Female | 54 | unknown      |                    |
| hCoV-19/Mexico/CMX-INMEGEN-05-01-134/2021 EPI_ISL_2881736  | 29/04/21 | North America / Mexico / Mexico City     | Human | Female | 44 | unknown      |                    |
| hCoV-19/Mexico/CMX-INMEGEN-05-01-137/2021 EPI_ISL_2881737  | 29/04/21 | North America / Mexico / Mexico City     | Human | Female | 45 | unknown      |                    |
| hCoV-19/Mexico/MEX-INMEGEN-05-01-138/2021 EPI_ISL_2881738  | 29/04/21 | North America / Mexico / State of Mexico | Human | Male   | 20 | unknown      |                    |
| hCoV-19/Mexico/CMX-INMEGEN-05-01-141/2021 EPI_ISL_2881739  | 29/04/21 | North America / Mexico / Mexico City     | Human | Female | 55 | unknown      |                    |
| hCoV-19/Mexico/CMX-INMEGEN-05-01-146/2021 EPI_ISL_2881740  | 29/04/21 | North America / Mexico / Mexico City     | Human | Female | 39 | unknown      |                    |

|                                                 |                 |          |                                          |       |        |    |         |
|-------------------------------------------------|-----------------|----------|------------------------------------------|-------|--------|----|---------|
| hCoV-19/Mexico/CMX-INMEGEN-05-01-155/2021       | EPI_ISL_2881741 | 29/04/21 | North America / Mexico / Mexico City     | Human | Female | 48 | unknown |
| hCoV-19/Mexico/CMX-INMEGEN-05-01-161/2021       | EPI_ISL_2881742 | 30/04/21 | North America / Mexico / Mexico City     | Human | Female | 50 | unknown |
| hCoV-19/Mexico/CMX-INMEGEN-05-01-168/2021       | EPI_ISL_2881743 | 29/04/21 | North America / Mexico / Mexico City     | Human | Female | 52 | unknown |
| hCoV-19/Mexico/CMX-INMEGEN-05-01-179/2021       | EPI_ISL_2881744 | 05/01/21 | North America / Mexico / Mexico City     | Human | Female | 56 | unknown |
| hCoV-19/Mexico/CMX-INMEGEN-05-01-186/2021       | EPI_ISL_2881745 | 21/04/21 | North America / Mexico / Mexico City     | Human | Female | 55 | unknown |
| hCoV-19/Mexico/HID-INMEGEN-05-02-8/2021         | EPI_ISL_2881746 | 04/05/21 | North America / Mexico / Hidalgo         | Human | Female | 30 | unknown |
| hCoV-19/Mexico/MEX-INMEGEN-05-02-13/2021        | EPI_ISL_2881747 | 04/05/21 | North America / Mexico / State of Mexico | Human | Male   | 49 | unknown |
| hCoV-19/Mexico/CMX-INMEGEN-05-02-71/2021        | EPI_ISL_2881748 | 10/05/21 | North America / Mexico / Mexico City     | Human | Male   | 45 | unknown |
| hCoV-19/Mexico/CMX-INMEGEN-05-02-73/2021        | EPI_ISL_2881749 | 10/05/21 | North America / Mexico / State of Mexico | Human | Male   | 46 | unknown |
| hCoV-19/Mexico/CMX-INMEGEN-05-02-77/2021        | EPI_ISL_2881750 | 10/05/21 | North America / Mexico / Mexico City     | Human | Female | 45 | unknown |
| hCoV-19/Mexico/HID-INMEGEN-05-02-86/2021        | EPI_ISL_2881751 | 28/04/21 | North America / Mexico / Hidalgo         | Human | Male   | 3  | unknown |
| hCoV-19/Mexico/HID-INMEGEN-05-02-87/2021        | EPI_ISL_2881752 | 28/04/21 | North America / Mexico / Hidalgo         | Human | Female | 46 | unknown |
| hCoV-19/Mexico/MEX-INMEGEN-05-02-91/2021        | EPI_ISL_2881753 | 28/04/21 | North America / Mexico / State of Mexico | Human | Male   | 52 | unknown |
| hCoV-19/Mexico/MEX-INMEGEN-05-02-115/2021       | EPI_ISL_2881755 | 29/04/21 | North America / Mexico / State of Mexico | Human | Male   | 52 | unknown |
| hCoV-19/Mexico/CMX-INMEGEN-05-02-139/2021       | EPI_ISL_2881756 | 30/04/21 | North America / Mexico / State of Mexico | Human | Female | 22 | unknown |
| hCoV-19/Mexico/MEX-INMEGEN-05-02-152/2021       | EPI_ISL_2881757 | 30/04/21 | North America / Mexico / State of Mexico | Human | Female | 47 | unknown |
| hCoV-19/Mexico/MEX-INMEGEN-05-03-37/2021        | EPI_ISL_2881760 | 07/05/21 | North America / Mexico / State of Mexico | Human | Female | 33 | unknown |
| hCoV-19/Mexico/MEX-INMEGEN-05-03-92/2021        | EPI_ISL_2881762 | 08/05/21 | North America / Mexico / State of Mexico | Human | Female | 35 | unknown |
| hCoV-19/Mexico/MEX-INMEGEN-05-03-107/2021       | EPI_ISL_2881763 | 08/05/21 | North America / Mexico / State of Mexico | Human | Female | 25 | unknown |
| hCoV-19/Mexico/CMX-INMEGEN-05-03-148/2021       | EPI_ISL_2881764 | 09/05/21 | North America / Mexico / Mexico City     | Human | Male   | 47 | unknown |
| hCoV-19/Mexico/MEX-INMEGEN-05-03-164/2021       | EPI_ISL_2881765 | 10/05/21 | North America / Mexico / State of Mexico | Human | Male   | 53 | unknown |
| hCoV-19/Mexico/CMX-INMEGEN-05-03-165/2021       | EPI_ISL_2881766 | 10/05/21 | North America / Mexico / Mexico City     | Human | Female | 46 | unknown |
| hCoV-19/Mexico/CMX-INMEGEN-INDRE-05-03-207/2021 | EPI_ISL_2881767 | 11/05/21 | North America / Mexico / Mexico City     | Human | Female | 69 | unknown |
| hCoV-19/Mexico/CMX-INMEGEN-INDRE-05-03-210/2021 | EPI_ISL_2881768 | 11/05/21 | North America / Mexico / State of Mexico | Human | Female | 36 | unknown |
| hCoV-19/Mexico/CMX-INMEGEN-INDRE-05-03-226/2021 | EPI_ISL_2881769 | 11/05/21 | North America / Mexico / Mexico City     | Human | Male   | 28 | unknown |
| hCoV-19/Mexico/CMX-INMEGEN-INDRE-05-03-236/2021 | EPI_ISL_2881770 | 13/05/21 | North America / Mexico / Mexico City     | Human | Male   | 53 | unknown |
| hCoV-19/Mexico/CMX-INMEGEN-INDRE-05-03-245/2021 | EPI_ISL_2881771 | 12/05/21 | North America / Mexico / State of Mexico | Human | Female | 19 | unknown |
| hCoV-19/Mexico/CMX-INMEGEN-INDRE-05-03-246/2021 | EPI_ISL_2881772 | 12/05/21 | North America / Mexico / State of Mexico | Human | Female | 25 | unknown |
| hCoV-19/Mexico/CMX-INMEGEN-INDRE-05-03-270/2021 | EPI_ISL_2881773 | 14/05/21 | North America / Mexico / Mexico City     | Human | Female | 75 | unknown |
| hCoV-19/Mexico/CMX-INMEGEN-INDRE-05-03-278/2021 | EPI_ISL_2881774 | 14/05/21 | North America / Mexico / Mexico City     | Human | Male   | 45 | unknown |
| hCoV-19/Mexico/MEX-INMEGEN-05-03-294/2021       | EPI_ISL_2881777 | 05/05/21 | North America / Mexico / State of Mexico | Human | Female | 47 | unknown |
| hCoV-19/Mexico/MEX-INMEGEN-05-03-296/2021       | EPI_ISL_2881778 | 05/05/21 | North America / Mexico / State of Mexico | Human | Female | 39 | unknown |
| hCoV-19/Mexico/CMX-INMEGEN-05-03-309/2021       | EPI_ISL_2881780 | 11/05/21 | North America / Mexico / Mexico City     | Human | Male   | 27 | unknown |
| hCoV-19/Mexico/CMX-INMEGEN-05-03-312/2021       | EPI_ISL_2881781 | 12/05/21 | North America / Mexico / Mexico City     | Human | Male   | 52 | unknown |
| hCoV-19/Mexico/MEX-INMEGEN-05-03-321/2021       | EPI_ISL_2881782 | 06/05/21 | North America / Mexico / State of Mexico | Human | Male   | 27 | unknown |
| hCoV-19/Mexico/MEX-INMEGEN-05-03-335/2021       | EPI_ISL_2881783 | 06/05/21 | North America / Mexico / State of Mexico | Human | Male   | 36 | unknown |
| hCoV-19/Mexico/MEX-INMEGEN-05-03-341/2021       | EPI_ISL_2881784 | 06/05/21 | North America / Mexico / State of Mexico | Human | Male   | 53 | unknown |
| hCoV-19/Mexico/CMX-INMEGEN-05-03-349/2021       | EPI_ISL_2881785 | 06/05/21 | North America / Mexico / Mexico City     | Human | Female | 46 | unknown |
| hCoV-19/Mexico/MEX-INMEGEN-05-03-358/2021       | EPI_ISL_2881787 | 06/05/21 | North America / Mexico / State of Mexico | Human | Male   | 26 | unknown |
| hCoV-19/Mexico/MEX-INMEGEN-05-03-362/2021       | EPI_ISL_2881788 | 06/05/21 | North America / Mexico / State of Mexico | Human | Male   | 58 | unknown |
| hCoV-19/Mexico/MEX-INMEGEN-05-03-364/2021       | EPI_ISL_2881789 | 06/05/21 | North America / Mexico / State of Mexico | Human | Female | 24 | unknown |
| hCoV-19/Mexico/MEX-INMEGEN-05-03-369/2021       | EPI_ISL_2881790 | 06/05/21 | North America / Mexico / State of Mexico | Human | Male   | 47 | unknown |
| hCoV-19/Mexico/CMX-INMEGEN-05-03-373/2021       | EPI_ISL_2881792 | 06/05/21 | North America / Mexico / Mexico City     | Human | Male   | 48 | unknown |
| hCoV-19/Mexico/MEX-INMEGEN-05-05-131/2021       | EPI_ISL_2881803 | 21/05/21 | North America / Mexico / State of Mexico | Human | Male   | 26 | unknown |

|                                             |                 |          |                                             |       |        |    |          |                     |
|---------------------------------------------|-----------------|----------|---------------------------------------------|-------|--------|----|----------|---------------------|
| hCoV-19/Mexico/CMX-INMEGEN-05-06-18/2021    | EPI_ISL_2881812 | 21/05/21 | North America / Mexico / Mexico City        | Human | Female | 33 | unknown  |                     |
| hCoV-19/Mexico/CMX-INMEGEN-05-06-35/2021    | EPI_ISL_2881813 | 25/05/21 | North America / Mexico / Mexico City        | Human | Female | 45 | unknown  |                     |
| hCoV-19/Mexico/CMX-INMEGEN-05-06-69/2021    | EPI_ISL_2881815 | 27/05/21 | North America / Mexico / Mexico City        | Human | Female | 26 | unknown  |                     |
| hCoV-19/Mexico/CMX-INMEGEN-05-06-92/2021    | EPI_ISL_2881816 | 31/05/21 | North America / Mexico / Mexico City        | Human | Male   | 29 | unknown  |                     |
| hCoV-19/Mexico/MEX-INMEGEN-05-06-98/2021    | EPI_ISL_2881817 | 12/05/21 | North America / Mexico / State of Mexico    | Human | Male   | 18 | unknown  |                     |
| hCoV-19/Mexico/MEX-INMEGEN-05-06-99/2021    | EPI_ISL_2881818 | 12/05/21 | North America / Mexico / State of Mexico    | Human | Female | 19 | unknown  |                     |
| hCoV-19/Mexico/MEX-INMEGEN-05-06-107/2021   | EPI_ISL_2881819 | 12/05/21 | North America / Mexico / State of Mexico    | Human | Female | 50 | unknown  |                     |
| hCoV-19/Mexico/HID-INMEGEN-05-06-110/2021   | EPI_ISL_2881821 | 13/05/21 | North America / Mexico / Hidalgo            | Human | Male   | 33 | unknown  |                     |
| hCoV-19/Mexico/CMX-INMEGEN-05-06-122/2021   | EPI_ISL_2881823 | 14/05/21 | North America / Mexico / Mexico City        | Human | Male   | 43 | unknown  |                     |
| hCoV-19/Mexico/MEX-INMEGEN-05-06-125/2021   | EPI_ISL_2881824 | 13/05/21 | North America / Mexico / State of Mexico    | Human | Male   | 38 | unknown  |                     |
| hCoV-19/Mexico/MEX-INMEGEN-05-06-127/2021   | EPI_ISL_2881825 | 13/05/21 | North America / Mexico / State of Mexico    | Human | Male   | 33 | unknown  |                     |
| hCoV-19/Mexico/MEX-INMEGEN-05-06-129/2021   | EPI_ISL_2881826 | 14/05/21 | North America / Mexico / State of Mexico    | Human | Male   | 49 | unknown  |                     |
| hCoV-19/Mexico/MEX-INMEGEN-05-06-137/2021   | EPI_ISL_2881828 | 17/05/21 | North America / Mexico / State of Mexico    | Human | Female | 39 | unknown  |                     |
| hCoV-19/Mexico/MEX-INMEGEN-05-06-146/2021   | EPI_ISL_2881830 | 15/05/21 | North America / Mexico / State of Mexico    | Human | Female | 11 | unknown  |                     |
| hCoV-19/Mexico/MEX-INMEGEN-05-06-147/2021   | EPI_ISL_2881831 | 15/05/21 | North America / Mexico / State of Mexico    | Human | Male   | 19 | unknown  |                     |
| hCoV-19/Mexico/CMX-INMEGEN-05-06-152/2021   | EPI_ISL_2881832 | 15/05/21 | North America / Mexico / Mexico City        | Human | Male   | 37 | unknown  |                     |
| hCoV-19/Mexico/MEX-INMEGEN-05-06-163/2021   | EPI_ISL_2881834 | 17/05/21 | North America / Mexico / State of Mexico    | Human | Female | 55 | unknown  |                     |
| hCoV-19/Mexico/CMX-INMEGEN-05-06-169/2021   | EPI_ISL_2881835 | 17/05/21 | North America / Mexico / Mexico City        | Human | Male   | 28 | unknown  |                     |
| hCoV-19/Mexico/CMX-INMEGEN-05-06-170/2021   | EPI_ISL_2881836 | 25/05/21 | North America / Mexico / Mexico City        | Human | Female | 38 | unknown  |                     |
| hCoV-19/Mexico/MEX-INMEGEN-05-06-178/2021   | EPI_ISL_2881837 | 17/05/21 | North America / Mexico / State of Mexico    | Human | Male   | 63 | unknown  |                     |
| hCoV-19/Mexico/ROO-INMEGEN-05-06-221/2021   | EPI_ISL_2881839 | 01/06/21 | North America / Mexico / Quintana Roo       | Human | Male   | 29 | unknown  |                     |
| hCoV-19/Mexico/MEX-INMEGEN-05-06-240/2021   | EPI_ISL_2881840 | 28/05/21 | North America / Mexico / State of Mexico    | Human | Female | 27 | unknown  |                     |
| hCoV-19/Mexico/HID-INMEGEN-05-06-374/2021   | EPI_ISL_2881844 | 29/05/21 | North America / Mexico / Hidalgo            | Human | Female | 33 | unknown  |                     |
| hCoV-19/Mexico/CMX-INMEGEN-05-06-375/2021   | EPI_ISL_2881845 | 29/05/21 | North America / Mexico / Mexico City        | Human | Female | 24 | unknown  |                     |
| hCoV-19/Mexico/MEX-INMEGEN-05-06-376/2021   | EPI_ISL_2881846 | 29/05/21 | North America / Mexico / State of Mexico    | Human | Female | 35 | unknown  |                     |
| hCoV-19/Mexico/MEX-INMEGEN-06-01-70/2021    | EPI_ISL_2881847 | 01/06/21 | North America / Mexico / State of Mexico    | Human | Male   | 51 | unknown  |                     |
| hCoV-19/Mexico/TAM-INMEGEN-06-01-336/2021   | EPI_ISL_2881850 | 05/06/21 | North America / Mexico / Tamaulipas         | Human | Female | 26 | unknown  |                     |
| hCoV-19/Mexico/TAB-INMEGEN-06-02-142/2021   | EPI_ISL_2881852 | 07/06/21 | North America / Mexico / Tabasco            | Human | Male   | 47 | unknown  |                     |
| hCoV-19/Mexico/MEX-INMEGEN-06-03-199/2021   | EPI_ISL_2881857 | 22/06/21 | North America / Mexico / State of Mexico    | Human | Male   | 32 | unknown  |                     |
| hCoV-19/Mexico/MEX-INMEGEN-06-04-3/2021     | EPI_ISL_2894154 | 09/06/21 | North America / Mexico / State of Mexico    | Human | Male   | 47 | unknown  | Oropharyngeal swab  |
| hCoV-19/Mexico/YUC-INMEGEN-06-04-39/2021    | EPI_ISL_2894183 | 10/06/21 | North America / Mexico / Yucatan            | Human | Male   | 28 | unknown  | Oropharyngeal swab  |
| hCoV-19/Mexico/YUC-INMEGEN-06-04-47/2021    | EPI_ISL_2894191 | 10/06/21 | North America / Mexico / Yucatan            | Human | Female | 35 | unknown  | Oropharyngeal swab  |
| hCoV-19/Mexico/YUC-INMEGEN-06-04-55/2021    | EPI_ISL_2894199 | 10/06/21 | North America / Mexico / Yucatan            | Human | Female | 42 | unknown  | Oropharyngeal swab  |
| hCoV-19/Mexico/VER-INMEGEN-06-04-71/2021    | EPI_ISL_2894215 | 10/06/21 | North America / Mexico / Veracruz           | Human | Male   | 16 | unknown  | Oropharyngeal swab  |
| hCoV-19/Mexico/TAM-INMEGEN-06-04-87/2021    | EPI_ISL_2894230 | 10/06/21 | North America / Mexico / Tamaulipas         | Human | Female | 39 | unknown  | Oropharyngeal swab  |
| hCoV-19/Mexico/CMX-INMEGEN-06-04-201/2021   | EPI_ISL_2894268 | 25/06/21 | North America / Mexico / Mexico City        | Human | Female | 4  | unknown  | Oropharyngeal swab  |
| hCoV-19/Mexico/CMX-INMEGEN-06-04-202/2021   | EPI_ISL_2894269 | 25/06/21 | North America / Mexico / Mexico City        | Human | Male   | 2  | unknown  | Oropharyngeal swab  |
| hCoV-19/Mexico/CMX-INMEGEN-06-04-239/2021   | EPI_ISL_2894299 | 28/06/21 | North America / Mexico / Mexico City        | Human | Female | 40 | unknown  | Oropharyngeal swab  |
| hCoV-19/Mexico/CMX-INMEGEN-06-04-258/2021   | EPI_ISL_2894312 | 29/06/21 | North America / Mexico / Mexico City        | Human | Female | 28 | unknown  | Oropharyngeal swab  |
| hCoV-19/Mexico/TAB-INMEGEN-06-04-327/2021   | EPI_ISL_2894373 | 12/06/21 | North America / Mexico / Tabasco            | Human | Female | 43 | unknown  | Oropharyngeal swab  |
| hCoV-19/Mexico/TAB-INMEGEN-06-04-328/2021   | EPI_ISL_2894374 | 12/06/21 | North America / Mexico / Tabasco            | Human | Female | 45 | unknown  | Oropharyngeal swab  |
| hCoV-19/Mexico/TAB-INMEGEN-06-04-331/2021   | EPI_ISL_2894377 | 12/06/21 | North America / Mexico / Tabasco            | Human | Male   | 37 | unknown  | Oropharyngeal swab  |
| hCoV-19/Mexico/SIN_CIAD-CLN_D0172/2021      | EPI_ISL_2894552 | 04/06/21 | North America / Mexico / Sinaloa / Mazatlan | Human | Male   | 37 | unknown  | Oropharyngeal swab  |
| hCoV-19/Mexico/GRO-InDRE_FB17785_S4178/2021 | EPI_ISL_2920749 | 08/06/21 | North America / Mexico / Guerrero           | Human | Female | 68 | Deceased | Oro-pharyngeal swab |



|                                                            |          |                                             |       |        |    |              |                     |
|------------------------------------------------------------|----------|---------------------------------------------|-------|--------|----|--------------|---------------------|
| 1CoV-19/Mexico/GRO-InDRE_FB17786_S4179/2021EPI_ISL_2920750 | 08/06/21 | North America / Mexico / Guerrero           | Human | Male   | 78 | Deceased     | Oro-pharyngeal swab |
| 1CoV-19/Mexico/MEX-InDRE_FB17916_S4180/2021EPI_ISL_2920751 | 01/06/21 | North America / Mexico / State of Mexico    | Human | Male   | 56 | Released     | Oro-pharyngeal swab |
| 1CoV-19/Mexico/CMX-InDRE_FB17943_S4181/2021EPI_ISL_2920752 | 08/06/21 | North America / Mexico / Mexico City        | Human | Female | 50 | Hospitalized | Oro-pharyngeal swab |
| hCoV-19/Mexico/MIC-InDRE_FB18219_S4182/2021EPI_ISL_2920753 | 14/06/21 | North America / Mexico / Michoacan          | Human | Male   | 23 | Released     | Oro-pharyngeal swab |
| 1CoV-19/Mexico/QUE-InDRE_FB18355_S4183/2021EPI_ISL_2920754 | 24/06/21 | North America / Mexico / Queretaro          | Human | Female | 49 | Released     | Oro-pharyngeal swab |
| 1CoV-19/Mexico/TAB-InDRE_FB18373_S4184/2021EPI_ISL_2920755 | 23/06/21 | North America / Mexico / Tabasco            | Human | Male   | 41 | Released     | Oro-pharyngeal swab |
| 1CoV-19/Mexico/TAB-InDRE_FB18374_S4185/2021EPI_ISL_2920756 | 23/06/21 | North America / Mexico / Tabasco            | Human | Female | 53 | Released     | Oro-pharyngeal swab |
| 1CoV-19/Mexico/TAB-InDRE_FB18376_S4186/2021EPI_ISL_2920757 | 23/06/21 | North America / Mexico / Tabasco            | Human | Female | 49 | Released     | Oro-pharyngeal swab |
| 1CoV-19/Mexico/TAB-InDRE_FB18380_S4187/2021EPI_ISL_2920758 | 23/06/21 | North America / Mexico / Tabasco            | Human | Male   | 61 | Released     | Oro-pharyngeal swab |
| 1CoV-19/Mexico/TAB-InDRE_FB18384_S4188/2021EPI_ISL_2920759 | 23/06/21 | North America / Mexico / Tabasco            | Human | Female | 26 | Released     | Oro-pharyngeal swab |
| 1CoV-19/Mexico/TAB-InDRE_FB18385_S4189/2021EPI_ISL_2920760 | 23/06/21 | North America / Mexico / Tabasco            | Human | Male   | 30 | Released     | Oro-pharyngeal swab |
| 1CoV-19/Mexico/TAB-InDRE_FB18390_S4190/2021EPI_ISL_2920761 | 23/06/21 | North America / Mexico / Tabasco            | Human | Female | 53 | Released     | Oro-pharyngeal swab |
| 1CoV-19/Mexico/TAB-InDRE_FB18391_S4191/2021EPI_ISL_2920762 | 23/06/21 | North America / Mexico / Tabasco            | Human | Male   | 29 | Released     | Oro-pharyngeal swab |
| 1CoV-19/Mexico/TAB-InDRE_FB18392_S4192/2021EPI_ISL_2920763 | 23/06/21 | North America / Mexico / Tabasco            | Human | Female | 45 | Released     | Oro-pharyngeal swab |
| 1CoV-19/Mexico/TAB-InDRE_FB18394_S4193/2021EPI_ISL_2920764 | 23/06/21 | North America / Mexico / Tabasco            | Human | Female | 46 | Released     | Oro-pharyngeal swab |
| 1CoV-19/Mexico/TAB-InDRE_FB18395_S4194/2021EPI_ISL_2920765 | 23/06/21 | North America / Mexico / Tabasco            | Human | Male   | 55 | Released     | Oro-pharyngeal swab |
| 1CoV-19/Mexico/TAB-InDRE_FB18399_S4195/2021EPI_ISL_2920766 | 23/06/21 | North America / Mexico / Tabasco            | Human | Female | 40 | Released     | Oro-pharyngeal swab |
| 1CoV-19/Mexico/TAB-InDRE_FB18401_S4196/2021EPI_ISL_2920767 | 23/06/21 | North America / Mexico / Tabasco            | Human | Female | 57 | Released     | Oro-pharyngeal swab |
| 1CoV-19/Mexico/TAB-InDRE_FB18405_S4197/2021EPI_ISL_2920768 | 23/06/21 | North America / Mexico / Tabasco            | Human | Male   | 33 | Released     | Oro-pharyngeal swab |
| 1CoV-19/Mexico/TAB-InDRE_FB18406_S4198/2021EPI_ISL_2920769 | 23/06/21 | North America / Mexico / Tabasco            | Human | Male   | 44 | Released     | Oro-pharyngeal swab |
| 1CoV-19/Mexico/TAB-InDRE_FB18409_S4199/2021EPI_ISL_2920770 | 24/06/21 | North America / Mexico / Tabasco            | Human | Female | 42 | Released     | Oro-pharyngeal swab |
| 1CoV-19/Mexico/TAB-InDRE_FB18411_S4200/2021EPI_ISL_2920771 | 24/06/21 | North America / Mexico / Tabasco            | Human | Male   | 57 | Released     | Oro-pharyngeal swab |
| 1CoV-19/Mexico/TAB-InDRE_FB18412_S4201/2021EPI_ISL_2920772 | 24/06/21 | North America / Mexico / Tabasco            | Human | Female | 22 | Released     | Oro-pharyngeal swab |
| 1CoV-19/Mexico/TAB-InDRE_FB18413_S4202/2021EPI_ISL_2920773 | 24/06/21 | North America / Mexico / Tabasco            | Human | Female | 60 | Released     | Oro-pharyngeal swab |
| 1CoV-19/Mexico/TAB-InDRE_FB18415_S4203/2021EPI_ISL_2920774 | 24/06/21 | North America / Mexico / Tabasco            | Human | Male   | 26 | Released     | Oro-pharyngeal swab |
| 1CoV-19/Mexico/TAB-InDRE_FB18416_S4204/2021EPI_ISL_2920775 | 24/06/21 | North America / Mexico / Tabasco            | Human | Male   | 23 | Released     | Oro-pharyngeal swab |
| 1CoV-19/Mexico/TAB-InDRE_FB18420_S4205/2021EPI_ISL_2920776 | 24/06/21 | North America / Mexico / Tabasco            | Human | Male   | 74 | Released     | Oro-pharyngeal swab |
| 1CoV-19/Mexico/TAB-InDRE_FB18421_S4206/2021EPI_ISL_2920777 | 24/06/21 | North America / Mexico / Tabasco            | Human | Male   | 38 | Released     | Oro-pharyngeal swab |
| 1CoV-19/Mexico/TAB-InDRE_FB18503_S4207/2021EPI_ISL_2920778 | 25/06/21 | North America / Mexico / Tabasco            | Human | Male   | 44 | Released     | Oro-pharyngeal swab |
| 1CoV-19/Mexico/TAB-InDRE_FB18508_S4208/2021EPI_ISL_2920779 | 25/06/21 | North America / Mexico / Tabasco            | Human | Female | 39 | Released     | Oro-pharyngeal swab |
| 1CoV-19/Mexico/TAB-InDRE_FB18513_S4209/2021EPI_ISL_2920780 | 25/06/21 | North America / Mexico / Tabasco            | Human | Male   | 22 | Released     | Oro-pharyngeal swab |
| 1CoV-19/Mexico/TAB-InDRE_FB18515_S4210/2021EPI_ISL_2920781 | 25/06/21 | North America / Mexico / Tabasco            | Human | Female | 38 | Released     | Oro-pharyngeal swab |
| 1CoV-19/Mexico/TAB-InDRE_FB18516_S4211/2021EPI_ISL_2920782 | 25/06/21 | North America / Mexico / Tabasco            | Human | Male   | 38 | Released     | Oro-pharyngeal swab |
| 1CoV-19/Mexico/TAB-InDRE_FB18520_S4212/2021EPI_ISL_2920783 | 25/06/21 | North America / Mexico / Tabasco            | Human | Male   | 34 | Released     | Oro-pharyngeal swab |
| 1CoV-19/Mexico/TAB-InDRE_FB18522_S4213/2021EPI_ISL_2920784 | 25/06/21 | North America / Mexico / Tabasco            | Human | Female | 37 | Released     | Oro-pharyngeal swab |
| 1CoV-19/Mexico/TAB-InDRE_FB18524_S4214/2021EPI_ISL_2920785 | 25/06/21 | North America / Mexico / Tabasco            | Human | Male   | 44 | Released     | Oro-pharyngeal swab |
| 1CoV-19/Mexico/TAB-InDRE_FB18532_S4215/2021EPI_ISL_2920786 | 26/06/21 | North America / Mexico / Tabasco            | Human | Female | 34 | Released     | Oro-pharyngeal swab |
| 1CoV-19/Mexico/TAB-InDRE_FB18534_S4216/2021EPI_ISL_2920787 | 26/06/21 | North America / Mexico / Tabasco            | Human | Female | 51 | Released     | Oro-pharyngeal swab |
| 1CoV-19/Mexico/TAB-InDRE_FB18538_S4217/2021EPI_ISL_2920788 | 26/06/21 | North America / Mexico / Tabasco            | Human | Male   | 29 | Released     | Oro-pharyngeal swab |
| 1CoV-19/Mexico/TAB-InDRE_FB18541_S4218/2021EPI_ISL_2920789 | 27/06/21 | North America / Mexico / Tabasco            | Human | Male   | 33 | Released     | Oro-pharyngeal swab |
| 1CoV-19/Mexico/TAB-InDRE_FB18544_S4219/2021EPI_ISL_2920790 | 27/06/21 | North America / Mexico / Tabasco            | Human | Female | 28 | Released     | Oro-pharyngeal swab |
| 1CoV-19/Mexico/AGU-InDRE_FB18588_S4220/2021EPI_ISL_2920791 | 24/06/21 | North America / Mexico / Aguascalientes     | Human | Female | 39 | Released     | Oro-pharyngeal swab |
| hCoV-19/Mexico/SIN_CiAD-MZT_S7159/2021 EPI_ISL_2927975     | 22/06/21 | North America / Mexico / Sinaloa / Mazatlan | Human | Male   | 47 | Asymptomatic | Oropharyngeal swab  |
| hCoV-19/Mexico/YUC-Biomedicos-6170340/2021 EPI_ISL_2928342 | 17/06/21 | North America / Mexico / Yucatan            | Human | Female | 34 | unknown      |                     |

|                                            |                 |          |                                          |       |        |    |              |                                    |
|--------------------------------------------|-----------------|----------|------------------------------------------|-------|--------|----|--------------|------------------------------------|
| hCoV-19/Mexico/MEX-INMEGEN-06-03-122/2021  | EPI_ISL_2928488 | 04/06/21 | North America / Mexico / State of Mexico | Human | Male   | 33 | unknown      | Oropharyngeal swab                 |
| CoV-19/Mexico/CMX-InDRE_FB17925_S4232/2021 | EPI_ISL_2937928 | 04/06/21 | North America / Mexico / Mexico City     | Human | Male   | 54 | Released     | Oropharyngeal swab                 |
| CoV-19/Mexico/CAM-LANGEBIO_IMSS_1166/2021  | EPI_ISL_2942328 | 16/06/21 | North America / Mexico / Campeche        | Human | Male   | 24 | Ambulatory   | Pharyngeal and nasopharyngeal swab |
| CoV-19/Mexico/YUC-LANGEBIO_IMSS_1176/2021  | EPI_ISL_2942337 | 18/06/21 | North America / Mexico / Yucatan         | Human | Male   | 27 | Ambulatory   | Pharyngeal and nasopharyngeal swab |
| CoV-19/Mexico/TAB-LANGEBIO_IMSS_1181/2021  | EPI_ISL_2942342 | 18/06/21 | North America / Mexico / Tabasco         | Human | Female | 45 | Ambulatory   | Pharyngeal and nasopharyngeal swab |
| CoV-19/Mexico/YUC-LANGEBIO_IMSS_1186/2021  | EPI_ISL_2942347 | 19/06/21 | North America / Mexico / Yucatan         | Human | Male   | 31 | Hospitalized | Pharyngeal and nasopharyngeal swab |
| CoV-19/Mexico/YUC-LANGEBIO_IMSS_1187/2021  | EPI_ISL_2942348 | 19/06/21 | North America / Mexico / Yucatan         | Human | Male   | 38 | Hospitalized | Pharyngeal and nasopharyngeal swab |
| CoV-19/Mexico/YUC-LANGEBIO_IMSS_1193/2021  | EPI_ISL_2942354 | 20/06/21 | North America / Mexico / Yucatan         | Human | Female | 63 | Hospitalized | Pharyngeal and nasopharyngeal swab |
| CoV-19/Mexico/YUC-LANGEBIO_IMSS_1199/2021  | EPI_ISL_2942360 | 21/06/21 | North America / Mexico / Yucatan         | Human | Female | 24 | Hospitalized | Pharyngeal and nasopharyngeal swab |
| CoV-19/Mexico/TAB-LANGEBIO_IMSS_1214/2021  | EPI_ISL_2942375 | 19/06/21 | North America / Mexico / Tabasco         | Human | Male   | 22 | Ambulatory   | Pharyngeal and nasopharyngeal swab |
| CoV-19/Mexico/TAB-LANGEBIO_IMSS_1215/2021  | EPI_ISL_2942376 | 19/06/21 | North America / Mexico / Tabasco         | Human | Female | 26 | Ambulatory   | Pharyngeal and nasopharyngeal swab |
| CoV-19/Mexico/TAB-LANGEBIO_IMSS_1216/2021  | EPI_ISL_2942377 | 19/06/21 | North America / Mexico / Tabasco         | Human | Female | 25 | Ambulatory   | Pharyngeal and nasopharyngeal swab |
| CoV-19/Mexico/TAB-LANGEBIO_IMSS_1217/2021  | EPI_ISL_2942378 | 19/06/21 | North America / Mexico / Tabasco         | Human | Female | 27 | Ambulatory   | Pharyngeal and nasopharyngeal swab |
| CoV-19/Mexico/YUC-LANGEBIO_IMSS_1242/2021  | EPI_ISL_2942403 | 23/06/21 | North America / Mexico / Yucatan         | Human | Female | 19 | Hospitalized | Nasopharyngeal swab                |
| CoV-19/Mexico/TAB-LANGEBIO_IMSS_1243/2021  | EPI_ISL_2942404 | 23/06/21 | North America / Mexico / Tabasco         | Human | Male   | 34 | Hospitalized | Pharyngeal and nasopharyngeal swab |
| CoV-19/Mexico/COL-LANGEBIO_IMSS_1249/2021  | EPI_ISL_2942408 | 12/06/21 | North America / Mexico / Colima          | Human | Male   | 49 | Hospitalized | Pharyngeal and nasopharyngeal swab |
| CoV-19/Mexico/GUA-LANGEBIO_IMSS_1261/2021  | EPI_ISL_2942418 | 15/06/21 | North America / Mexico / Guanajuato      | Human | Male   | 18 | Ambulatory   | Pharyngeal and nasopharyngeal swab |
| CoV-19/Mexico/SIN-LANGEBIO_IMSS_1276/2021  | EPI_ISL_2942432 | 17/06/21 | North America / Mexico / Sinaloa         | Human | Male   | 46 | Hospitalized | Pharyngeal and nasopharyngeal swab |
| CoV-19/Mexico/CHH-LANGEBIO_IMSS_1359/2021  | EPI_ISL_2942490 | 13/06/21 | North America / Mexico / Chihuahua       | Human | Male   | 67 | Hospitalized | Pharyngeal and nasopharyngeal swab |
| CoV-19/Mexico/CHH-LANGEBIO_IMSS_1360/2021  | EPI_ISL_2942491 | 13/06/21 | North America / Mexico / Chihuahua       | Human | Male   | 72 | Hospitalized | Pharyngeal and nasopharyngeal swab |
| CoV-19/Mexico/CHH-LANGEBIO_IMSS_1361/2021  | EPI_ISL_2942492 | 09/06/21 | North America / Mexico / Chihuahua       | Human | Female | 70 | Hospitalized | Pharyngeal and nasopharyngeal swab |
| CoV-19/Mexico/CHH-LANGEBIO_IMSS_1362/2021  | EPI_ISL_2942493 | 10/06/21 | North America / Mexico / Chihuahua       | Human | Female | 32 | Ambulatory   | Pharyngeal and nasopharyngeal swab |
| CoV-19/Mexico/COA-LANGEBIO_IMSS_1373/2021  | EPI_ISL_2942502 | 21/06/21 | North America / Mexico / Coahuila        | Human | Female | 46 | Ambulatory   | Pharyngeal and nasopharyngeal swab |
| CoV-19/Mexico/CHH-LANGEBIO_IMSS_1378/2021  | EPI_ISL_2942506 | 21/06/21 | North America / Mexico / Chihuahua       | Human | Female | 47 | Hospitalized | Pharyngeal and nasopharyngeal swab |
| CoV-19/Mexico/CHH-LANGEBIO_IMSS_1380/2021  | EPI_ISL_2942508 | 20/06/21 | North America / Mexico / Chihuahua       | Human | Male   | 23 | Hospitalized | Pharyngeal and nasopharyngeal swab |
| CoV-19/Mexico/PUE-LANGEBIO_IMSS_1386/2021  | EPI_ISL_2942514 | 11/06/21 | North America / Mexico / Puebla          | Human | Male   | 63 | Hospitalized | Pharyngeal and nasopharyngeal swab |
| CoV-19/Mexico/PUE-LANGEBIO_IMSS_1388/2021  | EPI_ISL_2942516 | 12/06/21 | North America / Mexico / Puebla          | Human | Female | 16 | Hospitalized | Pharyngeal and nasopharyngeal swab |
| CoV-19/Mexico/PUE-LANGEBIO_IMSS_1389/2021  | EPI_ISL_2942517 | 10/06/21 | North America / Mexico / Puebla          | Human | Female | 36 | Ambulatory   | Pharyngeal and nasopharyngeal swab |
| CoV-19/Mexico/OAX-LANGEBIO_IMSS_1396/2021  | EPI_ISL_2942522 | 17/06/21 | North America / Mexico / Oaxaca          | Human | Female | 31 | Ambulatory   | Pharyngeal and nasopharyngeal swab |
| CoV-19/Mexico/OAX-LANGEBIO_IMSS_1397/2021  | EPI_ISL_2942523 | 17/06/21 | North America / Mexico / Oaxaca          | Human | Male   | 28 | Ambulatory   | Pharyngeal and nasopharyngeal swab |
| CoV-19/Mexico/MOR-LANGEBIO_IMSS_1400/2021  | EPI_ISL_2942524 | 16/06/21 | North America / Mexico / Morelos         | Human | Female | 38 | Hospitalized | Pharyngeal and nasopharyngeal swab |
| CoV-19/Mexico/PUE-LANGEBIO_IMSS_1401/2021  | EPI_ISL_2942525 | 17/06/21 | North America / Mexico / Puebla          | Human | Male   | 53 | Hospitalized | Pharyngeal and nasopharyngeal swab |
| CoV-19/Mexico/PUE-LANGEBIO_IMSS_1402/2021  | EPI_ISL_2942526 | 16/06/21 | North America / Mexico / Puebla          | Human | Male   | 60 | Hospitalized | Pharyngeal and nasopharyngeal swab |
| CoV-19/Mexico/VER-LANGEBIO_IMSS_1412/2021  | EPI_ISL_2942536 | 17/06/21 | North America / Mexico / Veracruz        | Human | Male   | 33 | Ambulatory   | Pharyngeal and nasopharyngeal swab |
| CoV-19/Mexico/PUE-LANGEBIO_IMSS_1422/2021  | EPI_ISL_2942546 | 18/06/21 | North America / Mexico / Puebla          | Human | Female | 50 | Hospitalized | Pharyngeal and nasopharyngeal swab |
| CoV-19/Mexico/OAX-LANGEBIO_IMSS_1435/2021  | EPI_ISL_2942558 | 18/06/21 | North America / Mexico / Oaxaca          | Human | Male   | 33 | Ambulatory   | Pharyngeal and nasopharyngeal swab |
| CoV-19/Mexico/TAM-LANGEBIO_IMSS_1442/2021  | EPI_ISL_2942563 | 22/06/21 | North America / Mexico / Tamaulipas      | Human | Female | 36 | Ambulatory   | Pharyngeal and nasopharyngeal swab |
| CoV-19/Mexico/PUE-LANGEBIO_IMSS_1443/2021  | EPI_ISL_2942564 | 21/06/21 | North America / Mexico / Puebla          | Human | Male   | 32 | Ambulatory   | Nasopharyngeal swab                |
| CoV-19/Mexico/PUE-LANGEBIO_IMSS_1444/2021  | EPI_ISL_2942565 | 22/06/21 | North America / Mexico / Puebla          | Human | Male   | 67 | Hospitalized | Pharyngeal and nasopharyngeal swab |
| CoV-19/Mexico/PUE-LANGEBIO_IMSS_1445/2021  | EPI_ISL_2942566 | 20/06/21 | North America / Mexico / Puebla          | Human | Male   | 53 | Hospitalized | Pharyngeal and nasopharyngeal swab |
| CoV-19/Mexico/HID-LANGEBIO_IMSS_1447/2021  | EPI_ISL_2942568 | 22/06/21 | North America / Mexico / Hidalgo         | Human | Male   | 32 | Ambulatory   | Pharyngeal and nasopharyngeal swab |
| CoV-19/Mexico/CMX-LANGEBIO_IMSS_1454/2021  | EPI_ISL_2942574 | 04/06/21 | North America / Mexico / Mexico City     | Human | Male   | 67 | Hospitalized | Nasopharyngeal swab                |
| CoV-19/Mexico/CMX-LANGEBIO_IMSS_1470/2021  | EPI_ISL_2942588 | 07/06/21 | North America / Mexico / Mexico City     | Human | Male   | 47 | Ambulatory   | Pharyngeal and nasopharyngeal swab |
| CoV-19/Mexico/CMX-LANGEBIO_IMSS_1472/2021  | EPI_ISL_2942590 | 07/06/21 | North America / Mexico / Mexico City     | Human | Male   | 60 | Ambulatory   | Pharyngeal and nasopharyngeal swab |

|                                                           |          |                                          |       |        |    |              |                                    |
|-----------------------------------------------------------|----------|------------------------------------------|-------|--------|----|--------------|------------------------------------|
| 1CoV-19/Mexico/CMX-LANGEBIO_IMSS_1473/2021EPI_ISL_2942591 | 08/06/21 | North America / Mexico / Mexico City     | Human | Female | 36 | Ambulatory   | Pharyngeal and nasopharyngeal swab |
| 1CoV-19/Mexico/CMX-LANGEBIO_IMSS_1487/2021EPI_ISL_2942604 | 09/06/21 | North America / Mexico / Mexico City     | Human | Female | 35 | Ambulatory   | Pharyngeal and nasopharyngeal swab |
| hCoV-19/Mexico/YUC-LANGEBIO_IMSS_1538/2021EPI_ISL_2942649 | 25/06/21 | North America / Mexico / Yucatan         | Human | Female | 67 | Hospitalized | Pharyngeal and nasopharyngeal swab |
| hCoV-19/Mexico/YUC-LANGEBIO_IMSS_1556/2021EPI_ISL_2942667 | 28/06/21 | North America / Mexico / Yucatan         | Human | Male   | 80 | Ambulatory   | Pharyngeal and nasopharyngeal swab |
| hCoV-19/Mexico/TAB-LANGEBIO_IMSS_1577/2021EPI_ISL_2942688 | 27/06/21 | North America / Mexico / Tabasco         | Human | Male   | 33 | Hospitalized | Pharyngeal and nasopharyngeal swab |
| hCoV-19/Mexico/TAB-LANGEBIO_IMSS_1600/2021EPI_ISL_2942709 | 27/06/21 | North America / Mexico / Tabasco         | Human | Male   | 47 | Ambulatory   | Pharyngeal and nasopharyngeal swab |
| hCoV-19/Mexico/NAY-LANGEBIO_IMSS_1624/2021EPI_ISL_2942728 | 28/06/21 | North America / Mexico / Nayarit         | Human | Female | 28 | Hospitalized | Pharyngeal and nasopharyngeal swab |
| hCoV-19/Mexico/CHH-LANGEBIO_IMSS_1683/2021EPI_ISL_2942774 | 22/06/21 | North America / Mexico / Chihuahua       | Human | Male   | 44 | Ambulatory   | Pharyngeal and nasopharyngeal swab |
| hCoV-19/Mexico/DUR-LANGEBIO_IMSS_1701/2021EPI_ISL_2942789 | 02/07/21 | North America / Mexico / Durango         | Human | Male   | 48 | Ambulatory   | Pharyngeal and nasopharyngeal swab |
| 1CoV-19/Mexico/MEX-LANGEBIO_IMSS_1721/2021EPI_ISL_2942805 | 16/06/21 | North America / Mexico / State of Mexico | Human | Female | 51 | Ambulatory   | Pharyngeal and nasopharyngeal swab |
| 1CoV-19/Mexico/MEX-LANGEBIO_IMSS_1722/2021EPI_ISL_2942806 | 18/06/21 | North America / Mexico / State of Mexico | Human | Female | 30 | Hospitalized | Pharyngeal and nasopharyngeal swab |
| 1CoV-19/Mexico/CMX-LANGEBIO_IMSS_1729/2021EPI_ISL_2942812 | 20/06/21 | North America / Mexico / Mexico City     | Human | Male   | 60 | Hospitalized | Pharyngeal and nasopharyngeal swab |
| hCoV-19/Mexico/VER-LANGEBIO_IMSS_1739/2021EPI_ISL_2942821 | 21/06/21 | North America / Mexico / Veracruz        | Human | Male   | 45 | Hospitalized | Pharyngeal and nasopharyngeal swab |
| hCoV-19/Mexico/VER-LANGEBIO_IMSS_1747/2021EPI_ISL_2942828 | 24/06/21 | North America / Mexico / Veracruz        | Human | Male   | 39 | Ambulatory   | Pharyngeal and nasopharyngeal swab |
| hCoV-19/Mexico/VER-LANGEBIO_IMSS_1759/2021EPI_ISL_2942839 | 25/06/21 | North America / Mexico / Veracruz        | Human | Female | 43 | Ambulatory   | Pharyngeal and nasopharyngeal swab |
| 1CoV-19/Mexico/GRO-LANGEBIO_IMSS_1771/2021EPI_ISL_2942848 | 27/06/21 | North America / Mexico / Guerrero        | Human | Male   | 48 | Ambulatory   | Pharyngeal and nasopharyngeal swab |
| 1CoV-19/Mexico/GRO-LANGEBIO_IMSS_1772/2021EPI_ISL_2942849 | 27/06/21 | North America / Mexico / Guerrero        | Human | Male   | 54 | Ambulatory   | Pharyngeal and nasopharyngeal swab |
| 1CoV-19/Mexico/GRO-LANGEBIO_IMSS_1774/2021EPI_ISL_2942851 | 28/06/21 | North America / Mexico / Guerrero        | Human | Female | 72 | Hospitalized | Pharyngeal and nasopharyngeal swab |
| 1CoV-19/Mexico/CMX-LANGEBIO_IMSS_1788/2021EPI_ISL_2942865 | 29/06/21 | North America / Mexico / Mexico City     | Human | Female | 47 | Hospitalized | Pharyngeal and nasopharyngeal swab |
| 1CoV-19/Mexico/OAX-LANGEBIO_IMSS_1796/2021EPI_ISL_2942873 | 28/06/21 | North America / Mexico / Oaxaca          | Human | Male   | 22 | Ambulatory   | Pharyngeal and nasopharyngeal swab |
| 1CoV-19/Mexico/OAX-LANGEBIO_IMSS_1825/2021EPI_ISL_2942898 | 27/06/21 | North America / Mexico / Oaxaca          | Human | Female | 22 | Ambulatory   | Pharyngeal and nasopharyngeal swab |
| 1CoV-19/Mexico/OAX-LANGEBIO_IMSS_1826/2021EPI_ISL_2942899 | 26/06/21 | North America / Mexico / Oaxaca          | Human | Male   | 18 | Ambulatory   | Pharyngeal and nasopharyngeal swab |
| 1CoV-19/Mexico/OAX-LANGEBIO_IMSS_1827/2021EPI_ISL_2942900 | 28/06/21 | North America / Mexico / Oaxaca          | Human | Male   | 35 | Ambulatory   | Pharyngeal and nasopharyngeal swab |
| hCoV-19/Mexico/PUE-LANGEBIO_IMSS_1855/2021EPI_ISL_2942922 | 30/06/21 | North America / Mexico / Puebla          | Human | Female | 33 | Ambulatory   | Pharyngeal swab                    |
| 1CoV-19/Mexico/CMX-CEMENA-SEMAR-3866/2021EPI_ISL_2943127  | 04/06/21 | North America / Mexico / Mexico City     | Human | Male   | 65 | Deceased     | Nasopharyngeal swab                |
| 1V-19/Mexico/CAM_LANGEBIO_IMSS_06268-NC/2(EPI_ISL_2969864 | 18/03/21 | North America / Mexico / Campeche        | Human | Female | 42 | Ambulatory   | Pharyngeal / Nasopharyngeal swab   |
| 1V-19/Mexico/CAM_LANGEBIO_IMSS_07500-NC/2(EPI_ISL_2969865 | 14/04/21 | North America / Mexico / Campeche        | Human | Male   | 61 | Ambulatory   | Pharyngeal / Nasopharyngeal swab   |
| 1V-19/Mexico/CAM_LANGEBIO_IMSS_07581-NC/2(EPI_ISL_2969866 | 16/04/21 | North America / Mexico / Campeche        | Human | Male   | 23 | Ambulatory   | Pharyngeal / Nasopharyngeal swab   |
| 1V-19/Mexico/CAM_LANGEBIO_IMSS_07929-NC/2(EPI_ISL_2969867 | 22/04/21 | North America / Mexico / Campeche        | Human | Male   | 55 | Ambulatory   | Pharyngeal / Nasopharyngeal swab   |
| 1V-19/Mexico/CAM_LANGEBIO_IMSS_08065-NC/2(EPI_ISL_2969868 | 24/04/21 | North America / Mexico / Campeche        | Human | Female | 50 | Ambulatory   | Pharyngeal / Nasopharyngeal swab   |
| 1V-19/Mexico/CHH_LANGEBIO_IMSS_45976-NC/2(EPI_ISL_2969873 | 23/03/21 | North America / Mexico / Chihuahua       | Human | Male   | 69 | Hospitalized | Pharyngeal / Nasopharyngeal swab   |
| 1V-19/Mexico/CHH_LANGEBIO_IMSS_45995-NC/2(EPI_ISL_2969875 | 22/03/21 | North America / Mexico / Chihuahua       | Human | Male   | 71 | Hospitalized | Pharyngeal / Nasopharyngeal swab   |
| 1V-19/Mexico/CHH_LANGEBIO_IMSS_46396-NC/2(EPI_ISL_2969879 | 24/03/21 | North America / Mexico / Chihuahua       | Human | Male   | 58 | Hospitalized | Pharyngeal / Nasopharyngeal swab   |
| 1V-19/Mexico/CHH_LANGEBIO_IMSS_46557-NC/2(EPI_ISL_2969884 | 25/03/21 | North America / Mexico / Chihuahua       | Human | Male   | 71 | Hospitalized | Pharyngeal / Nasopharyngeal swab   |
| 1V-19/Mexico/CHH_LANGEBIO_IMSS_47895-NC/2(EPI_ISL_2969884 | 25/03/21 | North America / Mexico / Chihuahua       | Human | Female | 88 | Hospitalized | Pharyngeal / Nasopharyngeal swab   |
| 1V-19/Mexico/CHH_LANGEBIO_IMSS_47906-NC/2(EPI_ISL_2969885 | 30/03/21 | North America / Mexico / Chihuahua       | Human | Female | 62 | Hospitalized | Pharyngeal / Nasopharyngeal swab   |
| 1V-19/Mexico/CHH_LANGEBIO_IMSS_53048-NC/2(EPI_ISL_2969887 | 16/04/21 | North America / Mexico / Chihuahua       | Human | Male   | 48 | Ambulatory   | Pharyngeal / Nasopharyngeal swab   |
| 1V-19/Mexico/CHH_LANGEBIO_IMSS_53049-NC/2(EPI_ISL_2969888 | 16/04/21 | North America / Mexico / Chihuahua       | Human | Female | 56 | Hospitalized | Pharyngeal / Nasopharyngeal swab   |
| 1V-19/Mexico/CHH_LANGEBIO_IMSS_53112-NC/2(EPI_ISL_2969889 | 13/04/21 | North America / Mexico / Chihuahua       | Human | Female | 44 | Ambulatory   | Pharyngeal swab                    |
| 1V-19/Mexico/CHH_LANGEBIO_IMSS_61434-NC/2(EPI_ISL_2969890 | 17/05/21 | North America / Mexico / Chihuahua       | Human | Male   | 31 | Ambulatory   | Nasopharyngeal swab                |
| 1V-19/Mexico/CHH_LANGEBIO_IMSS_61999-NC/2(EPI_ISL_2969891 | 20/05/21 | North America / Mexico / Chihuahua       | Human | Female | 14 | Ambulatory   | Pharyngeal / Nasopharyngeal swab   |
| 1V-19/Mexico/CHH_LANGEBIO_IMSS_62647-NC/2(EPI_ISL_2969892 | 20/05/21 | North America / Mexico / Chihuahua       | Human | Female | 40 | Hospitalized | Pharyngeal / Nasopharyngeal swab   |
| 1V-19/Mexico/CHP_LANGEBIO_IMSS_94773-NC/2(EPI_ISL_2969895 | 30/03/21 | North America / Mexico / Chiapas         | Human | Female | 51 | Ambulatory   | Pharyngeal / Nasopharyngeal swab   |
| 1V-19/Mexico/CMX_LANGEBIO_IMSS_01909-NC/2(EPI_ISL_2969896 | 19/04/21 | North America / Mexico / Mexico City     | Human | Male   | 46 | Hospitalized | Pharyngeal / Nasopharyngeal swab   |

|                                                            |          |                                      |       |        |    |              |                                  |
|------------------------------------------------------------|----------|--------------------------------------|-------|--------|----|--------------|----------------------------------|
| oV-19/Mexico/CMX_LANGEBIO_IMSS_02237-NC/2(EPI_ISL_2969897  | 19/04/21 | North America / Mexico / Mexico City | Human | Male   | 47 | Ambulatory   | Pharyngeal / Nasopharyngeal swab |
| oV-19/Mexico/CMX_LANGEBIO_IMSS_02243-NC/2(EPI_ISL_2969898  | 20/04/21 | North America / Mexico / Mexico City | Human | Female | 44 | Ambulatory   | Pharyngeal / Nasopharyngeal swab |
| oV-19/Mexico/CMX_LANGEBIO_IMSS_11687-NC/2(EPI_ISL_2969899  | 19/05/21 | North America / Mexico / Mexico City | Human | Female | 46 | Ambulatory   | Pharyngeal / Nasopharyngeal swab |
| oV-19/Mexico/CMX-LANGEBIO_IMSS_81252-NC/2(EPI_ISL_2969901  | 04/03/21 | North America / Mexico / Mexico City | Human | Male   | 68 | Hospitalized | Nasopharyngeal swab              |
| oV-19/Mexico/CMX-LANGEBIO_IMSS_81433-NC/2(EPI_ISL_2969902  | 04/03/21 | North America / Mexico / Mexico City | Human | Female | 14 | Ambulatory   | Pharyngeal / Nasopharyngeal swab |
| oV-19/Mexico/CMX-LANGEBIO_IMSS_81483-NC/2(EPI_ISL_2969903  | 04/03/21 | North America / Mexico / Mexico City | Human | Female | 63 | Hospitalized | Pharyngeal / Nasopharyngeal swab |
| oV-19/Mexico/CMX-LANGEBIO_IMSS_81898-NC/2(EPI_ISL_2969904  | 06/03/21 | North America / Mexico / Mexico City | Human | Male   | 46 | Ambulatory   | Pharyngeal / Nasopharyngeal swab |
| oV-19/Mexico/CMX-LANGEBIO_IMSS_82184-NC/2(EPI_ISL_2969906  | 05/03/21 | North America / Mexico / Mexico City | Human | Female | 46 | Ambulatory   | Pharyngeal / Nasopharyngeal swab |
| oV-19/Mexico/CMX-LANGEBIO_IMSS_82315-NC/2(EPI_ISL_2969907  | 07/03/21 | North America / Mexico / Mexico City | Human | Male   | 57 | Hospitalized | Pharyngeal swab                  |
| oV-19/Mexico/CMX-LANGEBIO_IMSS_82470-NC/2(EPI_ISL_2969908  | 08/03/21 | North America / Mexico / Mexico City | Human | Female | 47 | Ambulatory   | Nasopharyngeal swab              |
| oV-19/Mexico/CMX-LANGEBIO_IMSS_82517-NC/2(EPI_ISL_2969909  | 06/03/21 | North America / Mexico / Mexico City | Human | Female | 68 | Hospitalized | Pharyngeal swab                  |
| oV-19/Mexico/CMX-LANGEBIO_IMSS_82547-NC/2(EPI_ISL_2969910  | 05/03/21 | North America / Mexico / Mexico City | Human | Male   | 65 | Hospitalized | Pharyngeal / Nasopharyngeal swab |
| oV-19/Mexico/CMX_LANGEBIO_IMSS_94611-NC/2(EPI_ISL_2969911  | 01/04/21 | North America / Mexico / Mexico City | Human | Female | 41 | Hospitalized | Pharyngeal swab                  |
| oV-19/Mexico/CMX_LANGEBIO_IMSS_94620-NC/2(EPI_ISL_2969912  | 01/04/21 | North America / Mexico / Mexico City | Human | Male   | 57 | Ambulatory   | Pharyngeal swab                  |
| oV-19/Mexico/CMX_LANGEBIO_IMSS_94634-NC/2(EPI_ISL_2969913  | 02/04/21 | North America / Mexico / Mexico City | Human | Male   | 80 | Hospitalized | Pharyngeal / Nasopharyngeal swab |
| oV-19/Mexico/CMX_LANGEBIO_IMSS_94834-NC/2(EPI_ISL_2969914  | 01/04/21 | North America / Mexico / Mexico City | Human | Male   | 78 | Hospitalized | Nasopharyngeal swab              |
| oV-19/Mexico/CMX_LANGEBIO_IMSS_94887-NC/2(EPI_ISL_2969915  | 04/04/21 | North America / Mexico / Mexico City | Human | Female | 65 | Hospitalized | Pharyngeal / Nasopharyngeal swab |
| oV-19/Mexico/CMX_LANGEBIO_IMSS_95084-NC/2(EPI_ISL_2969916  | 03/04/21 | North America / Mexico / Mexico City | Human | Male   | 87 | Hospitalized | Nasopharyngeal swab              |
| oV-19/Mexico/CMX_LANGEBIO_IMSS_95092-NC/2(EPI_ISL_2969917  | 02/04/21 | North America / Mexico / Mexico City | Human | Male   | 58 | Hospitalized | Pharyngeal / Nasopharyngeal swab |
| oV-19/Mexico/COA_LANGEBIO_IMSS_37994-NC/2(EPI_ISL_2969918  | 28/02/21 | North America / Mexico / Coahuila    | Human | Female | 63 | Hospitalized | Pharyngeal / Nasopharyngeal swab |
| oV-19/Mexico/COA_LANGEBIO_IMSS_38436-NC/2(EPI_ISL_2969920  | 03/03/21 | North America / Mexico / Coahuila    | Human | Female | 63 | Ambulatory   | Pharyngeal / Nasopharyngeal swab |
| oV-19/Mexico/COA_LANGEBIO_IMSS_38440-NC/2(EPI_ISL_2969921  | 03/03/21 | North America / Mexico / Coahuila    | Human | Male   | 8  | Ambulatory   | Pharyngeal / Nasopharyngeal swab |
| oV-19/Mexico/COA_LANGEBIO_IMSS_38888-NC/2(EPI_ISL_2969922  | 02/03/21 | North America / Mexico / Coahuila    | Human | Female | 79 | Hospitalized | Pharyngeal / Nasopharyngeal swab |
| oV-19/Mexico/COA_LANGEBIO_IMSS_47846-NC/2(EPI_ISL_2969923  | 30/03/21 | North America / Mexico / Coahuila    | Human | Female | 27 | Ambulatory   | Pharyngeal / Nasopharyngeal swab |
| oV-19/Mexico/COA_LANGEBIO_IMSS_60982-NC/2(EPI_ISL_2969924  | 17/05/21 | North America / Mexico / Coahuila    | Human | Male   | 55 | Ambulatory   | Pharyngeal / Nasopharyngeal swab |
| oV-19/Mexico/COL_LANGEBIO_IMSS_94701-NC/2(EPI_ISL_2969926  | 02/04/21 | North America / Mexico / Colima      | Human | Male   | 81 | Hospitalized | Pharyngeal swab                  |
| oV-19/Mexico/DUR_LANGEBIO_IMSS_37503-NC/2(EPI_ISL_2969928  | 25/02/21 | North America / Mexico / Durango     | Human | Male   | 45 | Ambulatory   | Pharyngeal / Nasopharyngeal swab |
| oV-19/Mexico/DUR_LANGEBIO_IMSS_38016-NC/2(EPI_ISL_2969929  | 28/02/21 | North America / Mexico / Durango     | Human | Female | 66 | Hospitalized | Pharyngeal / Nasopharyngeal swab |
| oV-19/Mexico/DUR_LANGEBIO_IMSS_47934-NC/2(EPI_ISL_2969932  | 31/03/21 | North America / Mexico / Durango     | Human | Male   | 74 | Hospitalized | Pharyngeal / Nasopharyngeal swab |
| oV-19/Mexico/DUR_LANGEBIO_IMSS_61232-NC/2(EPI_ISL_2969933  | 18/05/21 | North America / Mexico / Durango     | Human | Female | 47 | Hospitalized | Pharyngeal / Nasopharyngeal swab |
| oV-19/Mexico/GRO_LANGEBIO_IMSS_03966-NC/2(EPI_ISL_2969934  | 21/04/21 | North America / Mexico / Guerrero    | Human | Female | 32 | Ambulatory   | Pharyngeal / Nasopharyngeal swab |
| oV-19/Mexico/GUA_LANGEBIO_IMSS_29844-NC/2(EPI_ISL_2969937  | 09/03/21 | North America / Mexico / Guanajuato  | Human | Male   | 50 | Ambulatory   | Pharyngeal / Nasopharyngeal swab |
| oV-19/Mexico/GUA_LANGEBIO_IMSS_31027-NC/2(EPI_ISL_2969938  | 18/03/21 | North America / Mexico / Guanajuato  | Human | Female | 81 | Ambulatory   | Pharyngeal / Nasopharyngeal swab |
| oV-19/Mexico/GUA_LANGEBIO_IMSS_31538-NC/2(EPI_ISL_2969940  | 22/03/21 | North America / Mexico / Guanajuato  | Human | Female | 70 | Hospitalized | Pharyngeal / Nasopharyngeal swab |
| oV-19/Mexico/GUA_LANGEBIO_IMSS_31726-NC/2(EPI_ISL_2969941  | 22/03/21 | North America / Mexico / Guanajuato  | Human | Female | 35 | Ambulatory   | Pharyngeal / Nasopharyngeal swab |
| oV-19/Mexico/GUA_LANGEBIO_IMSS_31913-NC/2(EPI_ISL_2969942  | 24/03/21 | North America / Mexico / Guanajuato  | Human | Male   | 62 | Ambulatory   | Pharyngeal / Nasopharyngeal swab |
| oV-19/Mexico/HID_LANGEBIO_IMSS_06008-NC/20(EPI_ISL_2969943 | 29/04/21 | North America / Mexico / Hidalgo     | Human | Male   | 56 | Ambulatory   | Pharyngeal swab                  |
| oV-19/Mexico/HID_LANGEBIO_IMSS_19306-NC/20(EPI_ISL_2969944 | 14/06/21 | North America / Mexico / Hidalgo     | Human | Male   | 83 | Hospitalized | Pharyngeal swab                  |
| oV-19/Mexico/HID_LANGEBIO_IMSS_94587-NC/20(EPI_ISL_2969945 | 31/03/21 | North America / Mexico / Hidalgo     | Human | Male   | 79 | Hospitalized | Pharyngeal swab                  |
| oV-19/Mexico/JAL_LANGEBIO_IMSS_30385-NC/20(EPI_ISL_2969949 | 16/03/21 | North America / Mexico / Jalisco     | Human | Female | 51 | Hospitalized | Pharyngeal / Nasopharyngeal swab |
| oV-19/Mexico/JAL_LANGEBIO_IMSS_30659-NC/20(EPI_ISL_2969950 | 15/03/21 | North America / Mexico / Jalisco     | Human | Male   | 85 | Hospitalized | Nasopharyngeal swab              |
| oV-19/Mexico/JAL_LANGEBIO_IMSS_31185-NC/20(EPI_ISL_2969951 | 20/03/21 | North America / Mexico / Jalisco     | Human | Female | 30 | Ambulatory   | Pharyngeal / Nasopharyngeal swab |
| oV-19/Mexico/JAL_LANGEBIO_IMSS_31841-NC/20(EPI_ISL_2969952 | 25/03/21 | North America / Mexico / Jalisco     | Human | Female | 53 | Ambulatory   | Pharyngeal / Nasopharyngeal swab |
| oV-19/Mexico/JAL_LANGEBIO_IMSS_32124-NC/20(EPI_ISL_2969954 | 26/03/21 | North America / Mexico / Jalisco     | Human | Female | 51 | Hospitalized | Pharyngeal / Nasopharyngeal swab |

|                                                           |          |                                          |       |        |    |              |                                  |
|-----------------------------------------------------------|----------|------------------------------------------|-------|--------|----|--------------|----------------------------------|
| oV-19/Mexico/JAL_LANGEBIO_IMSS_35190-NC/20EPI_ISL_296995E | 21/04/21 | North America / Mexico / Jalisco         | Human | Female | 38 | Ambulatory   | Pharyngeal / Nasopharyngeal swab |
| oV-19/Mexico/JAL_LANGEBIO_IMSS_82292-NC/20EPI_ISL_2969957 | 06/03/21 | North America / Mexico / Jalisco         | Human | Male   | 88 | Hospitalized | Nasopharyngeal swab              |
| oV-19/Mexico/MEX_LANGEBIO_IMSS_03628-NC/2EPI_ISL_296995E  | 21/04/21 | North America / Mexico / State of Mexico | Human | Male   | 54 | Ambulatory   | Pharyngeal / Nasopharyngeal swab |
| oV-19/Mexico/MEX_LANGEBIO_IMSS_05456-NC/2EPI_ISL_296995E  | 04/04/21 | North America / Mexico / State of Mexico | Human | Female | 57 | Hospitalized | Pharyngeal / Nasopharyngeal swab |
| oV-19/Mexico/MEX_LANGEBIO_IMSS_11709-NC/2EPI_ISL_296996C  | 18/05/21 | North America / Mexico / State of Mexico | Human | Female | 52 | Hospitalized | Pharyngeal / Nasopharyngeal swab |
| oV-19/Mexico/MEX-LANGEBIO_IMSS_81253-NC/2EPI_ISL_296996E  | 05/03/21 | North America / Mexico / State of Mexico | Human | Female | 81 | Hospitalized | Pharyngeal / Nasopharyngeal swab |
| oV-19/Mexico/MEX-LANGEBIO_IMSS_81407-NC/2EPI_ISL_296996E  | 05/03/21 | North America / Mexico / State of Mexico | Human | Male   | 59 | Ambulatory   | Pharyngeal / Nasopharyngeal swab |
| oV-19/Mexico/MEX-LANGEBIO_IMSS_81607-NC/2EPI_ISL_2969967  | 05/03/21 | North America / Mexico / State of Mexico | Human | Female | 26 | Hospitalized | Pharyngeal / Nasopharyngeal swab |
| oV-19/Mexico/MEX_LANGEBIO_IMSS_81612-NC/2EPI_ISL_296996E  | 05/03/21 | North America / Mexico / Mexico          | Human | Male   | 51 | Hospitalized | Pharyngeal / Nasopharyngeal swab |
| oV-19/Mexico/MEX_LANGEBIO_IMSS_81897-NC/2EPI_ISL_296997C  | 06/03/21 | North America / Mexico / Mexico          | Human | Female | 44 | Ambulatory   | Pharyngeal / Nasopharyngeal swab |
| oV-19/Mexico/MEX-LANGEBIO_IMSS_82107-NC/2EPI_ISL_2969971  | 06/03/21 | North America / Mexico / State of Mexico | Human | Female | 55 | Ambulatory   | Pharyngeal / Nasopharyngeal swab |
| oV-19/Mexico/MEX-LANGEBIO_IMSS_82173-NC/2EPI_ISL_2969972  | 07/03/21 | North America / Mexico / State of Mexico | Human | Male   | 88 | Hospitalized | Pharyngeal / Nasopharyngeal swab |
| oV-19/Mexico/MEX-LANGEBIO_IMSS_82188-NC/2EPI_ISL_2969973  | 04/03/21 | North America / Mexico / State of Mexico | Human | Male   | 53 | Hospitalized | Pharyngeal / Nasopharyngeal swab |
| oV-19/Mexico/MEX-LANGEBIO_IMSS_82557-NC/2EPI_ISL_2969974  | 07/03/21 | North America / Mexico / State of Mexico | Human | Male   | 76 | Hospitalized | Pharyngeal / Nasopharyngeal swab |
| oV-19/Mexico/MEX_LANGEBIO_IMSS_92266-NC/2EPI_ISL_2969977  | 25/03/21 | North America / Mexico / State of Mexico | Human | Female | 54 | Hospitalized | Pharyngeal / Nasopharyngeal swab |
| oV-19/Mexico/MEX_LANGEBIO_IMSS_94599-NC/2EPI_ISL_296997E  | 31/03/21 | North America / Mexico / State of Mexico | Human | Female | 34 | Ambulatory   | Pharyngeal / Nasopharyngeal swab |
| oV-19/Mexico/MEX_LANGEBIO_IMSS_94628-NC/2EPI_ISL_296997E  | 02/04/21 | North America / Mexico / State of Mexico | Human | Female | 52 | Ambulatory   | Pharyngeal / Nasopharyngeal swab |
| oV-19/Mexico/MEX_LANGEBIO_IMSS_94793-NC/2EPI_ISL_296998C  | 03/04/21 | North America / Mexico / State of Mexico | Human | Male   | 60 | Hospitalized | Pharyngeal / Nasopharyngeal swab |
| oV-19/Mexico/MEX_LANGEBIO_IMSS_94846-NC/2EPI_ISL_2969981  | 02/04/21 | North America / Mexico / State of Mexico | Human | Female | 59 | Ambulatory   | Nasopharyngeal swab              |
| oV-19/Mexico/MIC_LANGEBIO_IMSS_31322-NC/20EPI_ISL_2969982 | 17/03/21 | North America / Mexico / Michoacan       | Human | Female | 50 | Ambulatory   | Pharyngeal / Nasopharyngeal swab |
| oV-19/Mexico/MIC_LANGEBIO_IMSS_31907-NC/20EPI_ISL_2969984 | 23/03/21 | North America / Mexico / Michoacan       | Human | Male   | 38 | Hospitalized | Pharyngeal / Nasopharyngeal swab |
| oV-19/Mexico/MOR_LANGEBIO_IMSS_06222-NC/2EPI_ISL_296998E  | 29/04/21 | North America / Mexico / Morelos         | Human | Male   | 75 | Hospitalized | Pharyngeal / Nasopharyngeal swab |
| oV-19/Mexico/NAY_LANGEBIO_IMSS_31171-NC/2EPI_ISL_2969987  | 20/03/21 | North America / Mexico / Nayarit         | Human | Male   | 64 | Hospitalized | Pharyngeal / Nasopharyngeal swab |
| oV-19/Mexico/NAY_LANGEBIO_IMSS_31172-NC/2EPI_ISL_296998E  | 20/03/21 | North America / Mexico / Nayarit         | Human | Male   | 72 | Hospitalized | Pharyngeal / Nasopharyngeal swab |
| oV-19/Mexico/NAY_LANGEBIO_IMSS_31857-NC/2EPI_ISL_296998E  | 24/03/21 | North America / Mexico / Nayarit         | Human | Male   | 57 | Ambulatory   | Pharyngeal / Nasopharyngeal swab |
| oV-19/Mexico/NLE_LANGEBIO_IMSS_34985-NC/2EPI_ISL_296999C  | 21/02/21 | North America / Mexico / Nuevo Leon      | Human | Male   | 67 | Hospitalized | Nasopharyngeal swab              |
| oV-19/Mexico/NLE_LANGEBIO_IMSS_35136-NC/2EPI_ISL_2969991  | 22/02/21 | North America / Mexico / Nuevo Leon      | Human | Male   | 25 | Ambulatory   | Pharyngeal / Nasopharyngeal swab |
| oV-19/Mexico/NLE_LANGEBIO_IMSS_35312-NC/2EPI_ISL_2969992  | 21/02/21 | North America / Mexico / Nuevo Leon      | Human | Female | 33 | Ambulatory   | Pharyngeal / Nasopharyngeal swab |
| oV-19/Mexico/NLE_LANGEBIO_IMSS_35857-NC/2EPI_ISL_2969993  | 23/02/21 | North America / Mexico / Nuevo Leon      | Human | Female | 32 | Hospitalized | Pharyngeal / Nasopharyngeal swab |
| oV-19/Mexico/NLE_LANGEBIO_IMSS_37727-NC/2EPI_ISL_296999E  | 01/03/21 | North America / Mexico / Nuevo Leon      | Human | Female | 57 | Ambulatory   | Pharyngeal / Nasopharyngeal swab |
| oV-19/Mexico/NLE_LANGEBIO_IMSS_38199-NC/2EPI_ISL_296999E  | 02/03/21 | North America / Mexico / Nuevo Leon      | Human | Female | 62 | Hospitalized | Pharyngeal / Nasopharyngeal swab |
| oV-19/Mexico/NLE_LANGEBIO_IMSS_38629-NC/2EPI_ISL_297000C  | 03/03/21 | North America / Mexico / Nuevo Leon      | Human | Male   | 31 | Ambulatory   | Pharyngeal / Nasopharyngeal swab |
| oV-19/Mexico/NLE_LANGEBIO_IMSS_53285-NC/2EPI_ISL_2970003  | 17/04/21 | North America / Mexico / Nuevo Leon      | Human | Male   | 80 | Hospitalized | Pharyngeal / Nasopharyngeal swab |
| oV-19/Mexico/NLE_LANGEBIO_IMSS_55036-NC/2EPI_ISL_2970004  | 25/04/21 | North America / Mexico / Nuevo Leon      | Human | Male   | 59 | Hospitalized | Pharyngeal / Nasopharyngeal swab |
| oV-19/Mexico/OAX_LANGEBIO_IMSS_22055-NC/2EPI_ISL_297000E  | 20/06/21 | North America / Mexico / Oaxaca          | Human | Female | 56 | Hospitalized | Pharyngeal / Nasopharyngeal swab |
| oV-19/Mexico/OAX_LANGEBIO_IMSS_25647-NC/2EPI_ISL_297001C  | 27/06/21 | North America / Mexico / Oaxaca          | Human | Female | 51 | Ambulatory   | Pharyngeal / Nasopharyngeal swab |
| oV-19/Mexico/OAX_LANGEBIO_IMSS_25650-NC/2EPI_ISL_2970011  | 27/06/21 | North America / Mexico / Oaxaca          | Human | Female | 41 | Ambulatory   | Pharyngeal / Nasopharyngeal swab |
| oV-19/Mexico/PUE_LANGEBIO_IMSS_02371-NC/2EPI_ISL_2970012  | 19/04/21 | North America / Mexico / Puebla          | Human | Female | 48 | Ambulatory   | Pharyngeal / Nasopharyngeal swab |
| oV-19/Mexico/PUE_LANGEBIO_IMSS_81620-NC/2EPI_ISL_2970013  | 04/03/21 | North America / Mexico / Puebla          | Human | Male   | 20 | Ambulatory   | Nasopharyngeal swab              |
| oV-19/Mexico/PUE_LANGEBIO_IMSS_81658-NC/2EPI_ISL_2970014  | 04/03/21 | North America / Mexico / Puebla          | Human | Male   | 60 | Ambulatory   | Pharyngeal / Nasopharyngeal swab |
| oV-19/Mexico/PUE_LANGEBIO_IMSS_81667-NC/2EPI_ISL_297001E  | 28/02/21 | North America / Mexico / Puebla          | Human | Male   | 59 | Hospitalized | Pharyngeal / Nasopharyngeal swab |
| oV-19/Mexico/PUE_LANGEBIO_IMSS_81669-NC/2EPI_ISL_297001E  | 03/03/21 | North America / Mexico / Puebla          | Human | Male   | 40 | Ambulatory   | Pharyngeal / Nasopharyngeal swab |
| oV-19/Mexico/PUE_LANGEBIO_IMSS_81670-NC/2EPI_ISL_2970017  | 03/03/21 | North America / Mexico / Puebla          | Human | Male   | 69 | Hospitalized | Pharyngeal / Nasopharyngeal swab |
| oV-19/Mexico/PUE_LANGEBIO_IMSS_81690-NC/2EPI_ISL_297001E  | 02/03/21 | North America / Mexico / Puebla          | Human | Male   | 32 | Ambulatory   | Pharyngeal / Nasopharyngeal swab |

|                                                            |          |                                          |       |        |    |              |                                  |
|------------------------------------------------------------|----------|------------------------------------------|-------|--------|----|--------------|----------------------------------|
| oV-19/Mexico/PUE_LANGEBIO_IMSS_81704-NC/2(EPI_ISL_2970019  | 03/03/21 | North America / Mexico / Puebla          | Human | Female | 36 | Ambulatory   | Pharyngeal / Nasopharyngeal swab |
| oV-19/Mexico/PUE_LANGEBIO_IMSS_81719-NC/2(EPI_ISL_2970020  | 03/03/21 | North America / Mexico / Puebla          | Human | Female | 48 | Ambulatory   | Nasopharyngeal swab              |
| oV-19/Mexico/QUE_LANGEBIO_IMSS_02178-NC/2(EPI_ISL_2970022  | 19/04/21 | North America / Mexico / Queretaro       | Human | Female | 50 | Ambulatory   | Pharyngeal / Nasopharyngeal swab |
| oV-19/Mexico/ROO_LANGEBIO_IMSS_07604-NC/2(EPI_ISL_2970024  | 17/04/21 | North America / Mexico / Quintana Roo    | Human | Male   | 53 | Hospitalized | Pharyngeal / Nasopharyngeal swab |
| oV-19/Mexico/ROO_LANGEBIO_IMSS_08135-NC/2(EPI_ISL_2970027  | 26/04/21 | North America / Mexico / Quintana Roo    | Human | Male   | 45 | Hospitalized | Pharyngeal / Nasopharyngeal swab |
| oV-19/Mexico/ROO_LANGEBIO_IMSS_9556Q-NC/2(EPI_ISL_2970033  | 21/05/21 | North America / Mexico / Quintana Roo    | Human | Male   | 37 | Ambulatory   | Pharyngeal / Nasopharyngeal swab |
| oV-19/Mexico/SIN_LANGEBIO_IMSS_31702-NC/20(EPI_ISL_2970034 | 19/03/21 | North America / Mexico / Sinaloa         | Human | Male   | 29 | Ambulatory   | Pharyngeal / Nasopharyngeal swab |
| oV-19/Mexico/SIN_LANGEBIO_IMSS_35879-NC/20(EPI_ISL_2970036 | 23/04/21 | North America / Mexico / Sinaloa         | Human | Male   | 70 | Hospitalized | Pharyngeal / Nasopharyngeal swab |
| oV-19/Mexico/SLP_LANGEBIO_IMSS_07436-NC/2(EPI_ISL_2970037  | 24/04/21 | North America / Mexico / San Luis Potosi | Human | Female | 82 | Hospitalized | Pharyngeal / Nasopharyngeal swab |
| oV-19/Mexico/SLP_LANGEBIO_IMSS_82587-NC/2(EPI_ISL_2970039  | 04/03/21 | North America / Mexico / San Luis Potosi | Human | Female | 75 | Hospitalized | Pharyngeal / Nasopharyngeal swab |
| oV-19/Mexico/TAB_LANGEBIO_IMSS_09329-NC/2(EPI_ISL_2970044  | 19/05/21 | North America / Mexico / Tabasco         | Human | Male   | 49 | Hospitalized | Pharyngeal / Nasopharyngeal swab |
| oV-19/Mexico/TAM_LANGEBIO_IMSS_38910-NC/2(EPI_ISL_2970049  | 03/03/21 | North America / Mexico / Tamaulipas      | Human | Male   | 27 | Ambulatory   | Pharyngeal / Nasopharyngeal swab |
| oV-19/Mexico/TLA_LANGEBIO_IMSS_81740-NC/2(EPI_ISL_2970052  | 05/03/21 | North America / Mexico / Tlaxcala        | Human | Female | 53 | Hospitalized | Pharyngeal / Nasopharyngeal swab |
| oV-19/Mexico/VER_LANGEBIO_IMSS_01938-NC/2(EPI_ISL_2970053  | 19/04/21 | North America / Mexico / Veracruz        | Human | Male   | 22 | Ambulatory   | Pharyngeal / Nasopharyngeal swab |
| oV-19/Mexico/VER_LANGEBIO_IMSS_02476-NC/2(EPI_ISL_2970054  | 19/04/21 | North America / Mexico / Veracruz        | Human | Male   | 30 | Ambulatory   | Nasopharyngeal swab              |
| oV-19/Mexico/VER_LANGEBIO_IMSS_81590-NC/2(EPI_ISL_2970059  | 02/03/21 | North America / Mexico / Veracruz        | Human | Male   | 25 | Ambulatory   | Nasopharyngeal swab              |
| oV-19/Mexico/YUC_LANGEBIO_IMSS_05338-NC/2(EPI_ISL_2970060  | 25/02/21 | North America / Mexico / Yucatan         | Human | Male   | 73 | Hospitalized | Nasopharyngeal swab              |
| oV-19/Mexico/YUC_LANGEBIO_IMSS_06425-NC/2(EPI_ISL_2970062  | 23/03/21 | North America / Mexico / Yucatan         | Human | Male   | 38 | Ambulatory   | Pharyngeal / Nasopharyngeal swab |
| oV-19/Mexico/YUC_LANGEBIO_IMSS_06458-NC/2(EPI_ISL_2970063  | 22/03/21 | North America / Mexico / Yucatan         | Human | Male   | 43 | Ambulatory   | Pharyngeal / Nasopharyngeal swab |
| oV-19/Mexico/YUC_LANGEBIO_IMSS_06463-NC/2(EPI_ISL_2970064  | 24/03/21 | North America / Mexico / Yucatan         | Human | Male   | 48 | Hospitalized | Pharyngeal / Nasopharyngeal swab |
| oV-19/Mexico/YUC_LANGEBIO_IMSS_06548-NC/2(EPI_ISL_2970065  | 25/03/21 | North America / Mexico / Yucatan         | Human | Male   | 52 | Hospitalized | Nasopharyngeal swab              |
| oV-19/Mexico/YUC_LANGEBIO_IMSS_06681-NC/2(EPI_ISL_2970066  | 29/03/21 | North America / Mexico / Yucatan         | Human | Female | 61 | Ambulatory   | Pharyngeal / Nasopharyngeal swab |
| oV-19/Mexico/YUC_LANGEBIO_IMSS_06693-NC/2(EPI_ISL_2970067  | 30/03/21 | North America / Mexico / Yucatan         | Human | Female | 63 | Hospitalized | Nasopharyngeal swab              |
| oV-19/Mexico/YUC_LANGEBIO_IMSS_07539-NC/2(EPI_ISL_2970068  | 15/04/21 | North America / Mexico / Yucatan         | Human | Male   | 54 | Hospitalized | Pharyngeal / Nasopharyngeal swab |
| oV-19/Mexico/YUC_LANGEBIO_IMSS_07592-NC/2(EPI_ISL_2970069  | 19/04/21 | North America / Mexico / Yucatan         | Human | Male   | 58 | Hospitalized | Pharyngeal / Nasopharyngeal swab |
| oV-19/Mexico/YUC_LANGEBIO_IMSS_07596-NC/2(EPI_ISL_2970070  | 19/04/21 | North America / Mexico / Yucatan         | Human | Female | 61 | Hospitalized | Pharyngeal / Nasopharyngeal swab |
| oV-19/Mexico/YUC_LANGEBIO_IMSS_07944-NC/2(EPI_ISL_2970072  | 25/04/21 | North America / Mexico / Yucatan         | Human | Female | 57 | Hospitalized | Pharyngeal / Nasopharyngeal swab |
| oV-19/Mexico/YUC_LANGEBIO_IMSS_07955-NC/2(EPI_ISL_2970073  | 25/04/21 | North America / Mexico / Yucatan         | Human | Male   | 73 | Hospitalized | Pharyngeal / Nasopharyngeal swab |
| oV-19/Mexico/YUC_LANGEBIO_IMSS_07959-NC/2(EPI_ISL_2970074  | 26/04/21 | North America / Mexico / Yucatan         | Human | Male   | 38 | Ambulatory   | Pharyngeal / Nasopharyngeal swab |
| oV-19/Mexico/YUC_LANGEBIO_IMSS_09587-NC/2(EPI_ISL_2970076  | 24/05/21 | North America / Mexico / Yucatan         | Human | Male   | 56 | Ambulatory   | Pharyngeal / Nasopharyngeal swab |
| oV-19/Mexico/YUC_LANGEBIO_IMSS_09682-NC/2(EPI_ISL_2970077  | 25/05/21 | North America / Mexico / Yucatan         | Human | Female | 24 | Ambulatory   | Pharyngeal / Nasopharyngeal swab |
| oV-19/Mexico/YUC_LANGEBIO_IMSS_11719-NC/2(EPI_ISL_2970078  | 15/06/21 | North America / Mexico / Yucatan         | Human | Female | 30 | Hospitalized | Pharyngeal / Nasopharyngeal swab |
| oV-19/Mexico/YUC_LANGEBIO_IMSS_12238-NC/2(EPI_ISL_2970083  | 22/06/21 | North America / Mexico / Yucatan         | Human | Female | 42 | Ambulatory   | Pharyngeal / Nasopharyngeal swab |
| oV-19/Mexico/ZAC_LANGEBIO_IMSS_03540-NC/2(EPI_ISL_2970086  | 03/03/21 | North America / Mexico / Zacatecas       | Human | Female | 22 | Ambulatory   | Pharyngeal / Nasopharyngeal swab |
| oV-19/Mexico/ZAC_LANGEBIO_IMSS_03590-NC/2(EPI_ISL_2970087  | 04/03/21 | North America / Mexico / Zacatecas       | Human | Male   | 79 | Hospitalized | Pharyngeal / Nasopharyngeal swab |
| oV-19/Mexico/ZAC_LANGEBIO_IMSS_03770-NC/2(EPI_ISL_2970089  | 07/03/21 | North America / Mexico / Zacatecas       | Human | Female | 31 | Ambulatory   | Pharyngeal / Nasopharyngeal swab |
| oV-19/Mexico/ZAC_LANGEBIO_IMSS_04932-NC/2(EPI_ISL_2970090  | 25/03/21 | North America / Mexico / Zacatecas       | Human | Male   | 2  | Ambulatory   | Pharyngeal / Nasopharyngeal swab |
| oV-19/Mexico/ZAC_LANGEBIO_IMSS_05051-NC/2(EPI_ISL_2970091  | 27/03/21 | North America / Mexico / Zacatecas       | Human | Male   | 33 | Ambulatory   | Pharyngeal / Nasopharyngeal swab |
| oV-19/Mexico/ZAC_LANGEBIO_IMSS_05427-NC/2(EPI_ISL_2970092  | 02/04/21 | North America / Mexico / Zacatecas       | Human | Male   | 69 | Ambulatory   | Pharyngeal / Nasopharyngeal swab |
| oV-19/Mexico/ZAC_LANGEBIO_IMSS_05446-NC/2(EPI_ISL_2970093  | 04/04/21 | North America / Mexico / Zacatecas       | Human | Male   | 32 | Hospitalized | Pharyngeal / Nasopharyngeal swab |
| oV-19/Mexico/ZAC_LANGEBIO_IMSS_06651-NC/2(EPI_ISL_2970094  | 19/04/21 | North America / Mexico / Zacatecas       | Human | Female | 25 | Ambulatory   | Pharyngeal / Nasopharyngeal swab |
| oV-19/Mexico/ZAC_LANGEBIO_IMSS_06883-NC/2(EPI_ISL_2970095  | 21/04/21 | North America / Mexico / Zacatecas       | Human | Male   | 80 | Ambulatory   | Pharyngeal / Nasopharyngeal swab |
| oV-19/Mexico/ZAC_LANGEBIO_IMSS_06991-NC/2(EPI_ISL_2970096  | 22/04/21 | North America / Mexico / Zacatecas       | Human | Male   | 25 | Ambulatory   | Pharyngeal / Nasopharyngeal swab |
| oV-19/Mexico/ZAC_LANGEBIO_IMSS_07022-NC/2(EPI_ISL_2970097  | 22/04/21 | North America / Mexico / Zacatecas       | Human | Male   | 34 | Ambulatory   | Pharyngeal / Nasopharyngeal swab |

|                                                           |                 |                                    |                                             |        |         |              |                                  |                    |
|-----------------------------------------------------------|-----------------|------------------------------------|---------------------------------------------|--------|---------|--------------|----------------------------------|--------------------|
| oV-19/Mexico/ZAC_LANGEBIO_IMSS_07262-NC/2CEPI_ISL_297009E | 07/04/21        | North America / Mexico / Zacatecas | Human                                       | Male   | 48      | Hospitalized | Pharyngeal / Nasopharyngeal swab |                    |
| oV-19/Mexico/ZAC_LANGEBIO_IMSS_07849-NC/2CEPI_ISL_297010I | 30/04/21        | North America / Mexico / Zacatecas | Human                                       | Female | 32      | Ambulatory   | Pharyngeal / Nasopharyngeal swab |                    |
| oV-19/Mexico/ZAC_LANGEBIO_IMSS_07893-NC/2CEPI_ISL_297010J | 01/05/21        | North America / Mexico / Zacatecas | Human                                       | Male   | 47      | Ambulatory   | Pharyngeal / Nasopharyngeal swab |                    |
| oV-19/Mexico/ZAC_LANGEBIO_IMSS_07896-NC/2CEPI_ISL_297010K | 01/05/21        | North America / Mexico / Zacatecas | Human                                       | Female | 44      | Ambulatory   | Pharyngeal / Nasopharyngeal swab |                    |
| oV-19/Mexico/ZAC_LANGEBIO_IMSS_09388-NC/2CEPI_ISL_297010L | 17/05/21        | North America / Mexico / Zacatecas | Human                                       | Female | 45      | Hospitalized | Pharyngeal / Nasopharyngeal swab |                    |
| hCoV-19/Mexico/TAB-INMEGEN-16-314/2021                    | EPI_ISL_2978623 | 14/06/21                           | North America / Mexico / Tabasco            | Human  | Female  | 51           | unknown                          | Oropharyngeal swab |
| hCoV-19/Mexico/YUC-INMEGEN-16-317/2021                    | EPI_ISL_2978624 | 16/06/21                           | North America / Mexico / Yucatan            | Human  | Male    | 33           | unknown                          | Oropharyngeal swab |
| hCoV-19/Mexico/TAB-INMEGEN-16-323/2021                    | EPI_ISL_297863C | 14/06/21                           | North America / Mexico / Tabasco            | Human  | Female  | 22           | unknown                          | Oropharyngeal swab |
| hCoV-19/Mexico/YUC-INMEGEN-16-325/2021                    | EPI_ISL_2978632 | 16/06/21                           | North America / Mexico / Yucatan            | Human  | Female  | 11           | unknown                          | Oropharyngeal swab |
| hCoV-19/Mexico/TAB-INMEGEN-16-331/2021                    | EPI_ISL_297863E | 14/06/21                           | North America / Mexico / Tabasco            | Human  | Male    | 31           | unknown                          | Oropharyngeal swab |
| hCoV-19/Mexico/TAB-INMEGEN-16-339/2021                    | EPI_ISL_2978644 | 14/06/21                           | North America / Mexico / Tabasco            | Human  | Male    | 26           | unknown                          | Oropharyngeal swab |
| hCoV-19/Mexico/TAB-INMEGEN-16-347/2021                    | EPI_ISL_297865I | 14/06/21                           | North America / Mexico / Tabasco            | Human  | Female  | 22           | unknown                          | Oropharyngeal swab |
| hCoV-19/Mexico/TAB-INMEGEN-16-369/2021                    | EPI_ISL_2978673 | 23/06/21                           | North America / Mexico / Tabasco            | Human  | Male    | 42           | unknown                          | Oropharyngeal swab |
| hCoV-19/Mexico/YUC-INMEGEN-16-373/2021                    | EPI_ISL_297867E | 16/06/21                           | North America / Mexico / Yucatan            | Human  | Female  | 42           | unknown                          | Oropharyngeal swab |
| hCoV-19/Mexico/SIN-CIAD-CLN_D0123/2021                    | EPI_ISL_298768E | 03/06/21                           | North America / Mexico / Sinaloa / Culiacan | Human  | Male    | 5            | unknown                          | Oropharyngeal swab |
| hCoV-19/Mexico/SIN-CIAD-MZT_HJ1854/2021                   | EPI_ISL_298770I | 18/06/21                           | North America / Mexico / Sinaloa / Mazatlan | Human  | Female  | 51           | unknown                          | Oropharyngeal swab |
| hCoV-19/Mexico/SIN-CIAD-MZT_HJ1855/2021                   | EPI_ISL_298770J | 18/06/21                           | North America / Mexico / Sinaloa / Mazatlan | Human  | Male    | 17           | Symptomatic                      | Oropharyngeal swab |
| hCoV-19/Mexico/YUC-NYGC-1009-SM/2021                      | EPI_ISL_302379C | 01/03/21                           | North America / Mexico / Yucatan            | Human  | Female  | 62           | Mild                             |                    |
| hCoV-19/Mexico/YUC-NYGC-6761-21/2021                      | EPI_ISL_3023803 | 25/01/21                           | North America / Mexico / Yucatan            | Human  | Male    | 47           | Mild                             |                    |
| hCoV-19/Mexico/YUC-NYGC-10773-21/2021                     | EPI_ISL_3023804 | 16/02/21                           | North America / Mexico / Yucatan            | Human  | Female  | 35           | Severe                           |                    |
| hCoV-19/Mexico/YUC-NYGC-12613-21/2021                     | EPI_ISL_302380E | 02/03/21                           | North America / Mexico / Yucatan            | Human  | Female  | 28           | Mild                             |                    |
| hCoV-19/Mexico/YUC-NYGC-13059-21/2021                     | EPI_ISL_302380E | 06/03/21                           | North America / Mexico / Yucatan            | Human  | Female  | 32           | Mild                             |                    |
| hCoV-19/Mexico/YUC-NYGC-13074-21/2021                     | EPI_ISL_3023807 | 06/03/21                           | North America / Mexico / Yucatan            | Human  | Male    | 43           | Severe                           |                    |
| hCoV-19/Mexico/YUC-NYGC-988-SM/2021                       | EPI_ISL_302380E | 22/02/21                           | North America / Mexico / Yucatan            | Human  | unknown | 42           | Mild                             |                    |
| hCoV-19/Mexico/YUC-NYGC-1156-SM/2021                      | EPI_ISL_302381C | 13/04/21                           | North America / Mexico / Yucatan            | Human  | Female  | 35           | Mild                             |                    |
| hCoV-19/Mexico/YUC-NYGC-14166-21/2021                     | EPI_ISL_302381I | 17/03/21                           | North America / Mexico / Yucatan            | Human  | Female  | 47           | Mild                             |                    |
| hCoV-19/Mexico/YUC-NYGC-1024-SM/2021                      | EPI_ISL_302381J | 03/03/21                           | North America / Mexico / Yucatan            | Human  | Male    | 43           | Mild                             |                    |
| hCoV-19/Mexico/YUC-NYGC-984-SM/2021                       | EPI_ISL_3023813 | 18/02/21                           | North America / Mexico / Yucatan            | Human  | unknown | 28           | Mild                             |                    |
| hCoV-19/Mexico/YUC-NYGC-14369-21/2021                     | EPI_ISL_3023814 | 18/03/21                           | North America / Mexico / Yucatan            | Human  | Female  | 21           | Mild                             |                    |
| hCoV-19/Mexico/YUC-NYGC-1233-SM/2021                      | EPI_ISL_3023817 | 05/05/21                           | North America / Mexico / Yucatan            | Human  | Male    | 54           | Mild                             |                    |
| hCoV-19/Mexico/YUC-NYGC-1926-21/2021                      | EPI_ISL_302381E | 08/01/21                           | North America / Mexico / Yucatan            | Human  | Male    | 52           | Mild                             |                    |
| hCoV-19/Mexico/YUC-NYGC-1171-SM/2021                      | EPI_ISL_302382C | 16/04/21                           | North America / Mexico / Yucatan            | Human  | unknown | 53           | Mild                             |                    |
| hCoV-19/Mexico/YUC-NYGC-944-SM/2021                       | EPI_ISL_302382I | 09/02/21                           | North America / Mexico / Yucatan            | Human  | unknown | 40           | Mild                             |                    |
| hCoV-19/Mexico/YUC-NYGC-7546-21/2021                      | EPI_ISL_302382E | 28/01/21                           | North America / Mexico / Yucatan            | Human  | Male    | 54           | Mild                             |                    |
| hCoV-19/Mexico/YUC-NYGC-15825-21/2021                     | EPI_ISL_302382E | 31/03/21                           | North America / Mexico / Yucatan            | Human  | Male    | 61           | Severe                           |                    |
| hCoV-19/Mexico/YUC-NYGC-5523-21/2021                      | EPI_ISL_3023862 | 20/01/21                           | North America / Mexico / Yucatan            | Human  | Female  | 48           | Mild                             |                    |
| hCoV-19/Mexico/YUC-NYGC-3593-21/2021                      | EPI_ISL_3023864 | 13/01/21                           | North America / Mexico / Yucatan            | Human  | Female  | 43           | Mild                             |                    |
| hCoV-19/Mexico/YUC-NYGC-5525-21/2021                      | EPI_ISL_3023867 | 20/01/21                           | North America / Mexico / Yucatan            | Human  | Male    | 34           | Mild                             |                    |
| hCoV-19/Mexico/YUC-NYGC-7102-21/2021                      | EPI_ISL_302387I | 27/01/21                           | North America / Mexico / Yucatan            | Human  | Male    | 38           | Mild                             |                    |
| hCoV-19/Mexico/YUC-NYGC-4333-21/2021                      | EPI_ISL_302387J | 17/01/21                           | North America / Mexico / Yucatan            | Human  | Female  | 52           | Mild                             |                    |
| hCoV-19/Mexico/YUC-NYGC-7159-21/2021                      | EPI_ISL_3023873 | 26/01/21                           | North America / Mexico / Yucatan            | Human  | Female  | 55           | Mild                             |                    |
| hCoV-19/Mexico/YUC-NYGC-2756-21/2021                      | EPI_ISL_3023874 | 11/01/21                           | North America / Mexico / Yucatan            | Human  | Female  | 29           | Mild                             |                    |
| hCoV-19/Mexico/YUC-NYGC-4346-21/2021                      | EPI_ISL_302387E | 15/01/21                           | North America / Mexico / Yucatan            | Human  | Male    | 40           | Mild                             |                    |
| hCoV-19/Mexico/YUC-NYGC-928-21/2021                       | EPI_ISL_302387E | 05/01/21                           | North America / Mexico / Yucatan            | Human  | Male    | 24           | unknown                          |                    |

|                                       |                 |          |                                  |       |         |    |        |
|---------------------------------------|-----------------|----------|----------------------------------|-------|---------|----|--------|
| hCoV-19/Mexico/YUC-NYGC-2133-21/2021  | EPI_ISL_3023877 | 08/01/21 | North America / Mexico / Yucatan | Human | Male    | 58 | Mild   |
| hCoV-19/Mexico/YUC-NYGC-3168-21/2021  | EPI_ISL_3023879 | 12/01/21 | North America / Mexico / Yucatan | Human | Male    | 60 | Mild   |
| hCoV-19/Mexico/YUC-NYGC-3664-21/2021  | EPI_ISL_3023880 | 14/01/21 | North America / Mexico / Yucatan | Human | Female  | 41 | Mild   |
| hCoV-19/Mexico/YUC-NYGC-4844-21/2021  | EPI_ISL_3023881 | 19/01/21 | North America / Mexico / Yucatan | Human | Male    | 61 | Mild   |
| hCoV-19/Mexico/YUC-NYGC-6234-21/2021  | EPI_ISL_3023882 | 24/01/21 | North America / Mexico / Yucatan | Human | Male    | 81 | Severe |
| hCoV-19/Mexico/YUC-NYGC-2357-21/2021  | EPI_ISL_3023883 | 08/01/21 | North America / Mexico / Yucatan | Human | Female  | 28 | Mild   |
| hCoV-19/Mexico/YUC-NYGC-11871-21/2021 | EPI_ISL_3023888 | 24/02/21 | North America / Mexico / Yucatan | Human | Male    | 42 | Mild   |
| hCoV-19/Mexico/YUC-NYGC-9227-21/2021  | EPI_ISL_3023890 | 06/02/21 | North America / Mexico / Yucatan | Human | Female  | 33 | Mild   |
| hCoV-19/Mexico/YUC-NYGC-11128-21/2021 | EPI_ISL_3023891 | 17/02/21 | North America / Mexico / Yucatan | Human | Female  | 45 | Mild   |
| hCoV-19/Mexico/YUC-NYGC-11883-21/2021 | EPI_ISL_3023892 | 24/02/21 | North America / Mexico / Yucatan | Human | Male    | 44 | Mild   |
| hCoV-19/Mexico/YUC-NYGC-12527-21/2021 | EPI_ISL_3023893 | 01/03/21 | North America / Mexico / Yucatan | Human | Female  | 56 | Mild   |
| hCoV-19/Mexico/YUC-NYGC-12930-21/2021 | EPI_ISL_3023894 | 05/03/21 | North America / Mexico / Yucatan | Human | Female  | 24 | Mild   |
| hCoV-19/Mexico/YUC-NYGC-10478-21/2021 | EPI_ISL_3023896 | 12/02/21 | North America / Mexico / Yucatan | Human | Male    | 85 | Mild   |
| hCoV-19/Mexico/YUC-NYGC-10765-21/2021 | EPI_ISL_3023897 | 15/02/21 | North America / Mexico / Yucatan | Human | Male    | 29 | Mild   |
| hCoV-19/Mexico/YUC-NYGC-11191-21/2021 | EPI_ISL_3023898 | 18/02/21 | North America / Mexico / Yucatan | Human | Male    | 35 | Mild   |
| hCoV-19/Mexico/YUC-NYGC-7842-21/2021  | EPI_ISL_3023899 | 29/01/21 | North America / Mexico / Yucatan | Human | Female  | 33 | Mild   |
| hCoV-19/Mexico/YUC-NYGC-8659-21/2021  | EPI_ISL_3023900 | 02/02/21 | North America / Mexico / Yucatan | Human | Female  | 25 | Mild   |
| hCoV-19/Mexico/YUC-NYGC-8785-21/2021  | EPI_ISL_3023902 | 03/02/21 | North America / Mexico / Yucatan | Human | Female  | 21 | Mild   |
| hCoV-19/Mexico/YUC-NYGC-9936-21/2021  | EPI_ISL_3023904 | 10/02/21 | North America / Mexico / Yucatan | Human | Female  | 21 | Mild   |
| hCoV-19/Mexico/YUC-NYGC-11311-21/2021 | EPI_ISL_3023905 | 19/02/21 | North America / Mexico / Yucatan | Human | Female  | 51 | Severe |
| hCoV-19/Mexico/YUC-NYGC-11666-21/2021 | EPI_ISL_3023906 | 23/02/21 | North America / Mexico / Yucatan | Human | Female  | 63 | Severe |
| hCoV-19/Mexico/YUC-NYGC-10610-21/2021 | EPI_ISL_3023908 | 14/02/21 | North America / Mexico / Yucatan | Human | Female  | 45 | Mild   |
| hCoV-19/Mexico/YUC-NYGC-12787-21/2021 | EPI_ISL_3023909 | 03/03/21 | North America / Mexico / Yucatan | Human | Male    | 49 | Mild   |
| hCoV-19/Mexico/YUC-NYGC-11083-21/2021 | EPI_ISL_3023911 | 17/02/21 | North America / Mexico / Yucatan | Human | Female  | 22 | Mild   |
| hCoV-19/Mexico/YUC-NYGC-12891-21/2021 | EPI_ISL_3023913 | 04/03/21 | North America / Mexico / Yucatan | Human | Male    | 33 | Mild   |
| hCoV-19/Mexico/YUC-NYGC-11481-21/2021 | EPI_ISL_3023914 | 22/02/21 | North America / Mexico / Yucatan | Human | Male    | 53 | Mild   |
| hCoV-19/Mexico/YUC-NYGC-11836-21/2021 | EPI_ISL_3023915 | 24/02/21 | North America / Mexico / Yucatan | Human | Male    | 23 | Mild   |
| hCoV-19/Mexico/YUC-NYGC-13187-21/2021 | EPI_ISL_3023916 | 08/03/21 | North America / Mexico / Yucatan | Human | Male    | 41 | Mild   |
| hCoV-19/Mexico/YUC-NYGC-14391-21/2021 | EPI_ISL_3023917 | 18/03/21 | North America / Mexico / Yucatan | Human | Male    | 22 | Mild   |
| hCoV-19/Mexico/YUC-NYGC-14494-21/2021 | EPI_ISL_3023920 | 19/03/21 | North America / Mexico / Yucatan | Human | Female  | 48 | Mild   |
| hCoV-19/Mexico/YUC-NYGC-14694-21/2021 | EPI_ISL_3023921 | 22/03/21 | North America / Mexico / Yucatan | Human | Female  | 45 | Mild   |
| hCoV-19/Mexico/YUC-NYGC-16539-21/2021 | EPI_ISL_3023922 | 07/04/21 | North America / Mexico / Yucatan | Human | Male    | 85 | Severe |
| hCoV-19/Mexico/YUC-NYGC-16705-21/2021 | EPI_ISL_3023924 | 08/04/21 | North America / Mexico / Yucatan | Human | Male    | 47 | Mild   |
| hCoV-19/Mexico/YUC-NYGC-809-SM/2021   | EPI_ISL_3023926 | 05/01/21 | North America / Mexico / Yucatan | Human | unknown | 57 | Mild   |
| hCoV-19/Mexico/YUC-NYGC-1014-SM/2021  | EPI_ISL_3023927 | 01/03/21 | North America / Mexico / Yucatan | Human | Female  | 31 | Mild   |
| hCoV-19/Mexico/YUC-NYGC-15327-21/2021 | EPI_ISL_3023928 | 26/03/21 | North America / Mexico / Yucatan | Human | Male    | 28 | Mild   |
| hCoV-19/Mexico/YUC-NYGC-16095-21/2021 | EPI_ISL_3023929 | 04/04/21 | North America / Mexico / Yucatan | Human | Female  | 48 | Mild   |
| hCoV-19/Mexico/YUC-NYGC-1025-SM/2021  | EPI_ISL_3023933 | 03/03/21 | North America / Mexico / Yucatan | Human | unknown | 56 | Severe |
| hCoV-19/Mexico/YUC-NYGC-1164-SM/2021  | EPI_ISL_3023934 | 15/04/21 | North America / Mexico / Yucatan | Human | Female  | 51 | Mild   |
| hCoV-19/Mexico/YUC-NYGC-13855-21/2021 | EPI_ISL_3023935 | 13/03/21 | North America / Mexico / Yucatan | Human | Male    | 89 | Mild   |
| hCoV-19/Mexico/YUC-NYGC-14581-21/2021 | EPI_ISL_3023936 | 20/03/21 | North America / Mexico / Yucatan | Human | Female  | 44 | Mild   |
| hCoV-19/Mexico/YUC-NYGC-15005-21/2021 | EPI_ISL_3023937 | 24/03/21 | North America / Mexico / Yucatan | Human | Male    | 20 | Mild   |
| hCoV-19/Mexico/YUC-NYGC-15870-21/2021 | EPI_ISL_3023938 | 31/03/21 | North America / Mexico / Yucatan | Human | Female  | 40 | Mild   |
| hCoV-19/Mexico/YUC-NYGC-13687-21/2021 | EPI_ISL_3023939 | 11/03/21 | North America / Mexico / Yucatan | Human | Male    | 53 | Mild   |



|                                       |                 |          |                                  |       |         |         |        |
|---------------------------------------|-----------------|----------|----------------------------------|-------|---------|---------|--------|
| hCoV-19/Mexico/YUC-NYGC-16344-21/2021 | EPI_ISL_3023940 | 06/04/21 | North America / Mexico / Yucatan | Human | Male    | 51      | Mild   |
| hCoV-19/Mexico/YUC-NYGC-16375-21/2021 | EPI_ISL_3023941 | 06/04/21 | North America / Mexico / Yucatan | Human | Female  | 25      | Mild   |
| hCoV-19/Mexico/YUC-NYGC-1185-SM/2021  | EPI_ISL_3023943 | 20/04/21 | North America / Mexico / Yucatan | Human | Male    | 20      | Mild   |
| hCoV-19/Mexico/YUC-NYGC-1247-SM/2021  | EPI_ISL_3023944 | 10/05/21 | North America / Mexico / Yucatan | Human | Female  | 52      | Mild   |
| hCoV-19/Mexico/YUC-NYGC-1186-SM/2021  | EPI_ISL_3023945 | 21/04/21 | North America / Mexico / Yucatan | Human | Male    | 18      | Mild   |
| hCoV-19/Mexico/YUC-NYGC-1249-SM/2021  | EPI_ISL_3023946 | 10/05/21 | North America / Mexico / Yucatan | Human | Male    | 56      | Mild   |
| hCoV-19/Mexico/YUC-NYGC-1258-SM/2021  | EPI_ISL_3023947 | 12/05/21 | North America / Mexico / Yucatan | Human | Male    | 28      | Mild   |
| hCoV-19/Mexico/YUC-NYGC-5537-21/2021  | EPI_ISL_3023965 | 21/01/21 | North America / Mexico / Yucatan | Human | Female  | 70      | Severe |
| hCoV-19/Mexico/YUC-NYGC-5885-21/2021  | EPI_ISL_3023966 | 22/01/21 | North America / Mexico / Yucatan | Human | Female  | 32      | Mild   |
| hCoV-19/Mexico/YUC-NYGC-12311-21/2021 | EPI_ISL_3023970 | 01/03/21 | North America / Mexico / Yucatan | Human | Female  | 22      | Mild   |
| hCoV-19/Mexico/YUC-NYGC-10761-21/2021 | EPI_ISL_3023971 | 15/02/21 | North America / Mexico / Yucatan | Human | Male    | 46      | Mild   |
| hCoV-19/Mexico/YUC-NYGC-11495-21/2021 | EPI_ISL_3023972 | 22/02/21 | North America / Mexico / Yucatan | Human | Male    | 65      | Mild   |
| hCoV-19/Mexico/YUC-NYGC-9725-21/2021  | EPI_ISL_3023973 | 09/02/21 | North America / Mexico / Yucatan | Human | Male    | 61      | Mild   |
| hCoV-19/Mexico/YUC-NYGC-11239-21/2021 | EPI_ISL_3023974 | 19/02/21 | North America / Mexico / Yucatan | Human | Female  | 25      | Mild   |
| hCoV-19/Mexico/YUC-NYGC-11658-21/2021 | EPI_ISL_3023975 | 22/02/21 | North America / Mexico / Yucatan | Human | Female  | 27      | Mild   |
| hCoV-19/Mexico/YUC-NYGC-12989-21/2021 | EPI_ISL_3023976 | 05/03/21 | North America / Mexico / Yucatan | Human | Female  | 48      | Mild   |
| hCoV-19/Mexico/YUC-NYGC-10806-21/2021 | EPI_ISL_3023977 | 16/02/21 | North America / Mexico / Yucatan | Human | Female  | 32      | Mild   |
| hCoV-19/Mexico/YUC-NYGC-12227-21/2021 | EPI_ISL_3023978 | 28/02/21 | North America / Mexico / Yucatan | Human | Male    | 53      | Mild   |
| hCoV-19/Mexico/YUC-NYGC-15438-21/2021 | EPI_ISL_3023982 | 28/03/21 | North America / Mexico / Yucatan | Human | Male    | 66      | Severe |
| hCoV-19/Mexico/YUC-NYGC-1191-SM/2021  | EPI_ISL_3023985 | 22/04/21 | North America / Mexico / Yucatan | Human | unknown | unknown | Mild   |
| hCoV-19/Mexico/YUC-NYGC-12267-21/2021 | EPI_ISL_3023988 | 01/03/21 | North America / Mexico / Yucatan | Human | Female  | 34      | Mild   |
| hCoV-19/Mexico/YUC-NYGC-7092-21/2021  | EPI_ISL_3023989 | 27/01/21 | North America / Mexico / Yucatan | Human | Female  | 53      | Mild   |
| hCoV-19/Mexico/YUC-NYGC-2130-21/2021  | EPI_ISL_3023990 | 08/01/21 | North America / Mexico / Yucatan | Human | Male    | 26      | Mild   |
| hCoV-19/Mexico/YUC-NYGC-8067-21/2021  | EPI_ISL_3023992 | 29/01/21 | North America / Mexico / Yucatan | Human | Male    | 55      | Mild   |
| hCoV-19/Mexico/YUC-NYGC-7090-21/2021  | EPI_ISL_3023993 | 27/01/21 | North America / Mexico / Yucatan | Human | Male    | 76      | Mild   |
| hCoV-19/Mexico/YUC-NYGC-10037-21/2021 | EPI_ISL_3023995 | 10/02/21 | North America / Mexico / Yucatan | Human | Female  | 29      | Mild   |
| hCoV-19/Mexico/YUC-NYGC-11124-21/2021 | EPI_ISL_3023996 | 17/02/21 | North America / Mexico / Yucatan | Human | Male    | 38      | Mild   |
| hCoV-19/Mexico/YUC-NYGC-12696-21/2021 | EPI_ISL_3023998 | 03/03/21 | North America / Mexico / Yucatan | Human | Female  | 39      | Mild   |
| hCoV-19/Mexico/YUC-NYGC-14497-21/2021 | EPI_ISL_3023999 | 19/03/21 | North America / Mexico / Yucatan | Human | Male    | 46      | Mild   |
| hCoV-19/Mexico/YUC-NYGC-11725-21/2021 | EPI_ISL_3024005 | 23/02/21 | North America / Mexico / Yucatan | Human | Female  | 66      | Mild   |
| hCoV-19/Mexico/YUC-NYGC-15130-21/2021 | EPI_ISL_3024006 | 25/03/21 | North America / Mexico / Yucatan | Human | Male    | 53      | Mild   |
| hCoV-19/Mexico/YUC-NYGC-3599-21/2021  | EPI_ISL_3024008 | 13/01/21 | North America / Mexico / Yucatan | Human | Male    | 28      | Mild   |
| hCoV-19/Mexico/YUC-NYGC-12555-21/2021 | EPI_ISL_3024010 | 02/03/21 | North America / Mexico / Yucatan | Human | Male    | 60      | Mild   |
| hCoV-19/Mexico/YUC-NYGC-10526-21/2021 | EPI_ISL_3024012 | 13/02/21 | North America / Mexico / Yucatan | Human | Female  | 79      | Mild   |
| hCoV-19/Mexico/YUC-NYGC-16147-21/2021 | EPI_ISL_3024014 | 05/04/21 | North America / Mexico / Yucatan | Human | Male    | 51      | Mild   |
| hCoV-19/Mexico/YUC-NYGC-15688-21/2021 | EPI_ISL_3024019 | 29/03/21 | North America / Mexico / Yucatan | Human | Female  | 34      | Mild   |
| hCoV-19/Mexico/YUC-NYGC-16843-21/2021 | EPI_ISL_3024020 | 10/04/21 | North America / Mexico / Yucatan | Human | Female  | 63      | Mild   |
| hCoV-19/Mexico/YUC-NYGC-14672-21/2021 | EPI_ISL_3024022 | 22/03/21 | North America / Mexico / Yucatan | Human | Male    | 21      | Mild   |
| hCoV-19/Mexico/YUC-NYGC-7688-21/2021  | EPI_ISL_3024023 | 28/01/21 | North America / Mexico / Yucatan | Human | Female  | 47      | Mild   |
| hCoV-19/Mexico/YUC-NYGC-2251/2021     | EPI_ISL_3024029 | 09/01/21 | North America / Mexico / Yucatan | Human | unknown | unknown | Mild   |
| hCoV-19/Mexico/YUC-NYGC-16079-21/2021 | EPI_ISL_3024030 | 03/04/21 | North America / Mexico / Yucatan | Human | Male    | 43      | Mild   |
| hCoV-19/Mexico/YUC-NYGC-176-21/2021   | EPI_ISL_3024034 | 02/01/21 | North America / Mexico / Yucatan | Human | Female  | 28      | Mild   |
| hCoV-19/Mexico/YUC-NYGC-6630-21/2021  | EPI_ISL_3024038 | 25/01/21 | North America / Mexico / Yucatan | Human | Female  | 47      | Mild   |
| hCoV-19/Mexico/YUC-NYGC-8908-21/2021  | EPI_ISL_3024040 | 03/02/21 | North America / Mexico / Yucatan | Human | Male    | 54      | Mild   |

|                                             |                 |          |                                      |       |        |    |              |                    |
|---------------------------------------------|-----------------|----------|--------------------------------------|-------|--------|----|--------------|--------------------|
| hCoV-19/Mexico/YUC-NYGC-10339-21/2021       | EPI_ISL_3024043 | 11/02/21 | North America / Mexico / Yucatan     | Human | Female | 52 | Mild         |                    |
| hCoV-19/Mexico/YUC-NYGC-14846-21/2021       | EPI_ISL_3024044 | 23/03/21 | North America / Mexico / Yucatan     | Human | Male   | 80 | Mild         |                    |
| hCoV-19/Mexico/YUC-NYGC-12232-21/2021       | EPI_ISL_3024045 | 28/02/21 | North America / Mexico / Yucatan     | Human | Female | 72 | Severe       |                    |
| hCoV-19/Mexico/YUC-NYGC-11890-21/2021       | EPI_ISL_3024046 | 24/02/21 | North America / Mexico / Yucatan     | Human | Male   | 67 | Severe       |                    |
| hCoV-19/Mexico/YUC-NYGC-11410-21/2021       | EPI_ISL_3024047 | 21/02/21 | North America / Mexico / Yucatan     | Human | Male   | 30 | Mild         |                    |
| hCoV-19/Mexico/YUC-NYGC-15446-21/2021       | EPI_ISL_3024053 | 28/03/21 | North America / Mexico / Yucatan     | Human | Male   | 36 | Mild         |                    |
| hCoV-19/Mexico/YUC-NYGC-16067-21/2021       | EPI_ISL_3024056 | 03/04/21 | North America / Mexico / Yucatan     | Human | Male   | 44 | Mild         |                    |
| hCoV-19/Mexico/YUC-NYGC-7697-21/2021        | EPI_ISL_3024059 | 28/01/21 | North America / Mexico / Yucatan     | Human | Male   | 29 | Mild         |                    |
| hCoV-19/Mexico/YUC-NYGC-15969-21/2021       | EPI_ISL_3024064 | 01/04/21 | North America / Mexico / Yucatan     | Human | Female | 0  | Mild         |                    |
| hCoV-19/Mexico/YUC-NYGC-14526-21/2021       | EPI_ISL_3024067 | 19/03/21 | North America / Mexico / Yucatan     | Human | Female | 35 | Mild         |                    |
| hCoV-19/Mexico/YUC-NYGC-13838-21/2021       | EPI_ISL_3024070 | 12/03/21 | North America / Mexico / Yucatan     | Human | Female | 36 | Mild         |                    |
| hCoV-19/Mexico/YUC-NYGC-13943-21/2021       | EPI_ISL_3024072 | 15/03/21 | North America / Mexico / Yucatan     | Human | Male   | 55 | Severe       |                    |
| hCoV-19/Mexico/YUC-NYGC-11657-21/2021       | EPI_ISL_3024073 | 22/02/21 | North America / Mexico / Yucatan     | Human | Male   | 58 | Mild         |                    |
| hCoV-19/Mexico/YUC-NYGC-14853-21/2021       | EPI_ISL_3024075 | 22/03/21 | North America / Mexico / Yucatan     | Human | Male   | 0  | Mild         |                    |
| hCoV-19/Mexico/YUC-NYGC-735-21/2021         | EPI_ISL_3024077 | 04/01/21 | North America / Mexico / Yucatan     | Human | Male   | 38 | Mild         |                    |
| hCoV-19/Mexico/YUC-NYGC-16073-21/2021       | EPI_ISL_3024081 | 02/04/21 | North America / Mexico / Yucatan     | Human | Male   | 26 | Mild         |                    |
| γCoV-19/Mexico/YUC-InDRE_FB18941_S4779/2021 | EPI_ISL_3033601 | 06/06/21 | North America / Mexico / Yucatan     | Human | Male   | 36 | Released     | Oropharyngeal swab |
| γCoV-19/Mexico/YUC-InDRE_FB18942_S4780/2021 | EPI_ISL_3033602 | 06/06/21 | North America / Mexico / Yucatan     | Human | Female | 19 | Released     | Oropharyngeal swab |
| γCoV-19/Mexico/YUC-InDRE_FB18960_S4781/2021 | EPI_ISL_3033603 | 14/06/21 | North America / Mexico / Yucatan     | Human | Female | 31 | Released     | Oropharyngeal swab |
| γCoV-19/Mexico/YUC-InDRE_FB18998_S4783/2021 | EPI_ISL_3033605 | 21/06/21 | North America / Mexico / Yucatan     | Human | Male   | 21 | Released     | Oropharyngeal swab |
| γCoV-19/Mexico/TAB-InDRE_FB19045_S4784/2021 | EPI_ISL_3033606 | 28/06/21 | North America / Mexico / Tabasco     | Human | Female | 52 | Released     | Oropharyngeal swab |
| γCoV-19/Mexico/TAB-InDRE_FB19056_S4785/2021 | EPI_ISL_3033607 | 28/06/21 | North America / Mexico / Tabasco     | Human | Female | 52 | Released     | Oropharyngeal swab |
| γCoV-19/Mexico/TAB-InDRE_FB19057_S4786/2021 | EPI_ISL_3033608 | 28/06/21 | North America / Mexico / Tabasco     | Human | Male   | 55 | Released     | Oropharyngeal swab |
| γCoV-19/Mexico/TAB-InDRE_FB19058_S4787/2021 | EPI_ISL_3033609 | 28/06/21 | North America / Mexico / Tabasco     | Human | Female | 39 | Released     | Oropharyngeal swab |
| γCoV-19/Mexico/CHP-InDRE_FB19059_S4788/2021 | EPI_ISL_3033610 | 28/06/21 | North America / Mexico / Chiapas     | Human | Male   | 62 | Released     | Oropharyngeal swab |
| γCoV-19/Mexico/TAB-InDRE_FB19061_S4789/2021 | EPI_ISL_3033611 | 28/06/21 | North America / Mexico / Tabasco     | Human | Female | 45 | Released     | Oropharyngeal swab |
| γCoV-19/Mexico/TAB-InDRE_FB19062_S4790/2021 | EPI_ISL_3033612 | 28/06/21 | North America / Mexico / Tabasco     | Human | Female | 31 | Released     | Oropharyngeal swab |
| γCoV-19/Mexico/TAB-InDRE_FB19064_S4791/2021 | EPI_ISL_3033613 | 28/06/21 | North America / Mexico / Tabasco     | Human | Female | 46 | Released     | Oropharyngeal swab |
| γCoV-19/Mexico/TAB-InDRE_FB19067_S4792/2021 | EPI_ISL_3033614 | 28/06/21 | North America / Mexico / Tabasco     | Human | Male   | 80 | Released     | Oropharyngeal swab |
| γCoV-19/Mexico/TAB-InDRE_FB19069_S4793/2021 | EPI_ISL_3033615 | 28/06/21 | North America / Mexico / Tabasco     | Human | Female | 29 | Released     | Oropharyngeal swab |
| γCoV-19/Mexico/TAB-InDRE_FB19076_S4794/2021 | EPI_ISL_3033616 | 28/06/21 | North America / Mexico / Tabasco     | Human | Female | 44 | Released     | Oropharyngeal swab |
| γCoV-19/Mexico/TAB-InDRE_FB19081_S4795/2021 | EPI_ISL_3033617 | 28/06/21 | North America / Mexico / Tabasco     | Human | Female | 51 | Released     | Oropharyngeal swab |
| γCoV-19/Mexico/TAB-InDRE_FB19083_S4796/2021 | EPI_ISL_3033618 | 28/06/21 | North America / Mexico / Tabasco     | Human | Female | 39 | Released     | Oropharyngeal swab |
| γCoV-19/Mexico/TAB-InDRE_FB19088_S4797/2021 | EPI_ISL_3033619 | 28/06/21 | North America / Mexico / Tabasco     | Human | Female | 47 | Released     | Oropharyngeal swab |
| hCoV-19/Mexico/MIC-InDRE_FB19101_S4798/2021 | EPI_ISL_3033620 | 24/06/21 | North America / Mexico / Michoacan   | Human | Male   | 25 | Hospitalized | Oropharyngeal swab |
| γCoV-19/Mexico/TAB-InDRE_FB19306_S4799/2021 | EPI_ISL_3033621 | 29/06/21 | North America / Mexico / Tabasco     | Human | Female | 18 | Released     | Oropharyngeal swab |
| γCoV-19/Mexico/TAB-InDRE_FB19320_S4800/2021 | EPI_ISL_3033622 | 29/06/21 | North America / Mexico / Tabasco     | Human | Female | 32 | Released     | Oropharyngeal swab |
| γCoV-19/Mexico/QUE-InDRE_FB19322_S4801/2021 | EPI_ISL_3033623 | 04/07/21 | North America / Mexico / Queretaro   | Human | Male   | 55 | Released     | Oropharyngeal swab |
| hCoV-19/Mexico/MIC-InDRE_FB19323_S4802/2021 | EPI_ISL_3033624 | 19/06/21 | North America / Mexico / Michoacan   | Human | Male   | 31 | Released     | Oropharyngeal swab |
| hCoV-19/Mexico/MIC-InDRE_FB19325_S4803/2021 | EPI_ISL_3033625 | 25/06/21 | North America / Mexico / Michoacan   | Human | Male   | 68 | Hospitalized | Oropharyngeal swab |
| γCoV-19/Mexico/CMX-InDRE_FB19396_S4804/2021 | EPI_ISL_3033626 | 15/06/21 | North America / Mexico / Mexico City | Human | Male   | 38 | Released     | Oropharyngeal swab |
| γCoV-19/Mexico/QUE-InDRE_FB19407_S4805/2021 | EPI_ISL_3033627 | 29/06/21 | North America / Mexico / Queretaro   | Human | Female | 52 | Released     | Oropharyngeal swab |
| γCoV-19/Mexico/TAB-InDRE_FB19444_S4806/2021 | EPI_ISL_3033628 | 19/06/21 | North America / Mexico / Tabasco     | Human | Female | 53 | Released     | Oropharyngeal swab |
| γCoV-19/Mexico/TAB-InDRE_FB19455_S4807/2021 | EPI_ISL_3033629 | 30/06/21 | North America / Mexico / Tabasco     | Human | Male   | 59 | Released     | Oropharyngeal swab |

|                                                            |          |                                          |       |         |         |          |                    |
|------------------------------------------------------------|----------|------------------------------------------|-------|---------|---------|----------|--------------------|
| 1CoV-19/Mexico/PUE-InDRE_FB19599_S4808/2021EPI_ISL_3033630 | 08/06/21 | North America / Mexico / Puebla          | Human | Male    | 59      | Released | Oropharyngeal swab |
| 1CoV-19/Mexico/PUE-InDRE_FB19602_S4809/2021EPI_ISL_3033631 | 09/06/21 | North America / Mexico / Puebla          | Human | Male    | 30      | Released | Oropharyngeal swab |
| 1CoV-19/Mexico/TAB-InDRE_FB19665_S4810/2021EPI_ISL_3033632 | 02/07/21 | North America / Mexico / Tabasco         | Human | Female  | 52      | Released | Oropharyngeal swab |
| 1CoV-19/Mexico/TAB-InDRE_FB19051_S4815/2021EPI_ISL_3033634 | 27/06/21 | North America / Mexico / Tabasco         | Human | Female  | 46      | Released | Oropharyngeal swab |
| hCoV-19/Mexico/PUE-LABOPAT-24_20684/2021 EPI_ISL_3044157   | 10/06/21 | North America / Mexico / Puebla          | Human | unknown | unknown | unknown  | Oropharyngeal swab |
| hCoV-19/Mexico/PUE-LABOPAT-37_21356/2021 EPI_ISL_3044475   | 07/06/21 | North America / Mexico / Puebla          | Human | unknown | unknown | unknown  | Oropharyngeal swab |
| hCoV-19/Mexico/PUE-LABOPAT-40_21496/2021 EPI_ISL_3044671   | 07/06/21 | North America / Mexico / Puebla          | Human | unknown | unknown | unknown  | Oropharyngeal swab |
| hCoV-19/Mexico/PUE-LABOPAT-13_16263/2021 EPI_ISL_3045055   | 03/06/21 | North America / Mexico / Puebla          | Human | unknown | unknown | unknown  | Oropharyngeal swab |
| hCoV-19/Mexico/PUE-LABOPAT-7_18351/2021 EPI_ISL_3045057    | 03/06/21 | North America / Mexico / Puebla          | Human | unknown | unknown | unknown  | Oropharyngeal swab |
| hCoV-19/Mexico/PUE-LABOPAT-10_16498/2021 EPI_ISL_3045058   | 03/06/21 | North America / Mexico / Puebla          | Human | unknown | unknown | unknown  | Oropharyngeal swab |
| hCoV-19/Mexico/PUE-LABOPAT-3_17781/2021 EPI_ISL_3045059    | 03/06/21 | North America / Mexico / Puebla          | Human | unknown | unknown | unknown  | Oropharyngeal swab |
| hCoV-19/Mexico/PUE-LABOPAT-36_20997/2021 EPI_ISL_3055571   | 17/06/21 | North America / Mexico / Puebla          | Human | unknown | unknown | unknown  | Oropharyngeal swab |
| hCoV-19/Mexico/PUE-LABOPAT-20_20441/2021 EPI_ISL_3055572   | 10/06/21 | North America / Mexico / Puebla          | Human | unknown | unknown | unknown  | Oropharyngeal swab |
| hCoV-19/Mexico/PUE-LABOPAT-15_15988/2021 EPI_ISL_3055573   | 03/06/21 | North America / Mexico / Puebla          | Human | unknown | unknown | unknown  | Oropharyngeal swab |
| hCoV-19/Mexico/PUE-LABOPAT-34_21175/2021 EPI_ISL_3055574   | 17/06/21 | North America / Mexico / Puebla          | Human | unknown | unknown | unknown  | Oropharyngeal swab |
| hCoV-19/Mexico/PUE-LABOPAT-2_17717/2021 EPI_ISL_3055575    | 03/06/21 | North America / Mexico / Puebla          | Human | unknown | unknown | unknown  | Oropharyngeal swab |
| hCoV-19/Mexico/PUE-LABOPAT-1_17712/2021 EPI_ISL_3055576    | 03/06/21 | North America / Mexico / Puebla          | Human | unknown | unknown | unknown  | Oropharyngeal swab |
| hCoV-19/Mexico/PUE-LABOPAT-9_19117/2021 EPI_ISL_3055577    | 03/06/21 | North America / Mexico / Puebla          | Human | unknown | unknown | unknown  | Oropharyngeal swab |
| hCoV-19/Mexico/PUE-LABOPAT-4_17900/2021 EPI_ISL_3055578    | 03/06/21 | North America / Mexico / Puebla          | Human | unknown | unknown | unknown  | Oropharyngeal swab |
| hCoV-19/Mexico/PUE-LABOPAT-18_20390/2021 EPI_ISL_3055580   | 10/06/21 | North America / Mexico / Puebla          | Human | unknown | unknown | unknown  | Oropharyngeal swab |
| hCoV-19/Mexico/PUE-LABOPAT-5_17806/2021 EPI_ISL_3055581    | 03/06/21 | North America / Mexico / Puebla          | Human | unknown | unknown | unknown  | Oropharyngeal swab |
| hCoV-19/Mexico/PUE-LABOPAT-17_20285/2021 EPI_ISL_3055582   | 10/06/21 | North America / Mexico / Puebla          | Human | unknown | unknown | unknown  | Oropharyngeal swab |
| hCoV-19/Mexico/PUE-LABOPAT-12_16266/2021 EPI_ISL_3055583   | 03/06/21 | North America / Mexico / Puebla          | Human | unknown | unknown | unknown  | Oropharyngeal swab |
| hCoV-19/Mexico/TAB-INMEGEN-17-129/2021 EPI_ISL_3067981     | 23/06/21 | North America / Mexico / Tabasco         | Human | Female  | 45      | unknown  | Oropharyngeal swab |
| hCoV-19/Mexico/TAM-INMEGEN-17-145/2021 EPI_ISL_3067982     | 23/06/21 | North America / Mexico / Tamaulipas      | Human | Male    | 13      | unknown  | Oropharyngeal swab |
| hCoV-19/Mexico/CMX-InDRE_203/2021 EPI_ISL_933680           | 06/01/21 | North America / Mexico / Mexico City     | Human | Male    | 36      | unknown  | Oropharyngeal swab |
| hCoV-19/Mexico/CMX-InDRE_204/2021 EPI_ISL_933681           | 07/01/21 | North America / Mexico / Mexico City     | Human | Female  | 36      | unknown  | Oropharyngeal swab |
| hCoV-19/Mexico/CMX-InDRE_205/2021 EPI_ISL_933682           | 07/01/21 | North America / Mexico / Mexico City     | Human | Male    | 35      | unknown  | Oropharyngeal swab |
| hCoV-19/Mexico/CMX-InDRE_206/2021 EPI_ISL_933683           | 07/01/21 | North America / Mexico / Mexico City     | Human | Male    | 36      | unknown  | Oropharyngeal swab |
| hCoV-19/Mexico/CMX-InDRE_207/2021 EPI_ISL_933684           | 07/01/21 | North America / Mexico / Mexico City     | Human | Male    | 49      | unknown  | Oropharyngeal swab |
| hCoV-19/Mexico/CMX-InDRE_208/2021 EPI_ISL_933685           | 07/01/21 | North America / Mexico / Mexico City     | Human | Female  | 36      | unknown  | Oropharyngeal swab |
| hCoV-19/Mexico/CMX-InDRE_209/2021 EPI_ISL_933686           | 07/01/21 | North America / Mexico / Mexico City     | Human | Male    | 60      | unknown  | Oropharyngeal swab |
| hCoV-19/Mexico/CMX-InDRE_210/2021 EPI_ISL_933687           | 07/01/21 | North America / Mexico / Mexico City     | Human | Female  | 16      | unknown  | Oropharyngeal swab |
| hCoV-19/Mexico/CMX-InDRE_211/2021 EPI_ISL_933688           | 07/01/21 | North America / Mexico / Mexico City     | Human | Female  | 17      | unknown  | Oropharyngeal swab |
| hCoV-19/Mexico/CMX-InDRE_212/2021 EPI_ISL_933689           | 07/01/21 | North America / Mexico / Mexico City     | Human | Female  | 76      | unknown  | Oropharyngeal swab |
| hCoV-19/Mexico/CMX-InDRE_213/2021 EPI_ISL_933690           | 08/01/21 | North America / Mexico / Mexico City     | Human | Female  | 46      | unknown  | Oropharyngeal swab |
| hCoV-19/Mexico/CMX-InDRE_214/2021 EPI_ISL_933691           | 08/01/21 | North America / Mexico / Mexico City     | Human | Male    | 58      | unknown  | Oropharyngeal swab |
| hCoV-19/Mexico/MEX-InDRE_215/2021 EPI_ISL_933692           | 08/01/21 | North America / Mexico / State of Mexico | Human | Female  | 25      | unknown  | Oropharyngeal swab |
| hCoV-19/Mexico/CMX-InDRE_242/2021 EPI_ISL_942928           | 13/01/21 | North America / Mexico / Mexico City     | Human | Male    | 48      | Released | Oropharyngeal swab |
| hCoV-19/Mexico/CMX-INMEGEN-01-03-03/2021 EPI_ISL_944613    | 11/01/21 | North America / Mexico / Mexico City     | Human | Male    | 48      | unknown  | Oropharyngeal swab |
| hCoV-19/Mexico/CMX-INMEGEN-01-03-04/2021 EPI_ISL_944614    | 04/01/21 | North America / Mexico / Mexico City     | Human | Female  | 31      | unknown  | Oropharyngeal swab |
| hCoV-19/Mexico/CMX-INMEGEN-01-03-06/2021 EPI_ISL_944616    | 11/01/21 | North America / Mexico / Mexico City     | Human | Female  | 47      | unknown  | Oropharyngeal swab |
| hCoV-19/Mexico/CMX-INMEGEN-01-03-07/2021 EPI_ISL_944617    | 12/01/21 | North America / Mexico / Mexico City     | Human | Male    | 32      | unknown  | Oropharyngeal swab |
| hCoV-19/Mexico/CMX-INMEGEN-01-03-08/2021 EPI_ISL_944618    | 14/01/21 | North America / Mexico / Mexico City     | Human | Female  | 38      | unknown  | Oropharyngeal swab |

|                                          |                |          |                                      |       |        |    |         |                    |
|------------------------------------------|----------------|----------|--------------------------------------|-------|--------|----|---------|--------------------|
| hCoV-19/Mexico/CMX-INMEGEN-01-03-09/2021 | EPI_ISL_944619 | 11/01/21 | North America / Mexico / Mexico City | Human | Female | 53 | unknown | Oropharyngeal swab |
| hCoV-19/Mexico/CMX-INMEGEN-01-03-11/2021 | EPI_ISL_944621 | 14/01/21 | North America / Mexico / Mexico City | Human | Female | 61 | unknown | Oropharyngeal swab |
| hCoV-19/Mexico/CMX-INMEGEN-01-03-12/2021 | EPI_ISL_944622 | 12/01/21 | North America / Mexico / Mexico City | Human | Male   | 25 | unknown | Oropharyngeal swab |
| hCoV-19/Mexico/CMX-INMEGEN-01-03-13/2021 | EPI_ISL_944623 | 10/01/21 | North America / Mexico / Mexico City | Human | Female | 20 | unknown | Oropharyngeal swab |
| hCoV-19/Mexico/CMX-INMEGEN-01-03-14/2021 | EPI_ISL_944624 | 08/01/21 | North America / Mexico / Mexico City | Human | Female | 21 | unknown | Oropharyngeal swab |
| hCoV-19/Mexico/CMX-INMEGEN-01-03-15/2021 | EPI_ISL_944625 | 08/01/21 | North America / Mexico / Mexico City | Human | Female | 62 | unknown | Oropharyngeal swab |
| hCoV-19/Mexico/CMX-INMEGEN-01-03-16/2021 | EPI_ISL_944626 | 12/01/21 | North America / Mexico / Mexico City | Human | Male   | 30 | unknown | Oropharyngeal swab |
| hCoV-19/Mexico/CMX-INMEGEN-01-03-17/2021 | EPI_ISL_944627 | 11/01/21 | North America / Mexico / Mexico City | Human | Male   | 46 | unknown | Oropharyngeal swab |
| hCoV-19/Mexico/CMX-INMEGEN-01-03-18/2021 | EPI_ISL_944628 | 11/01/21 | North America / Mexico / Mexico City | Human | Male   | 52 | unknown | Oropharyngeal swab |
| hCoV-19/Mexico/CMX-INMEGEN-01-03-19/2021 | EPI_ISL_944629 | 13/01/21 | North America / Mexico / Mexico City | Human | Female | 61 | unknown | Oropharyngeal swab |
| hCoV-19/Mexico/CMX-INMEGEN-01-03-20/2021 | EPI_ISL_944630 | 13/01/21 | North America / Mexico / Mexico City | Human | Male   | 27 | unknown | Oropharyngeal swab |
| hCoV-19/Mexico/CMX-INMEGEN-01-03-21/2021 | EPI_ISL_944631 | 11/01/21 | North America / Mexico / Mexico City | Human | Female | 40 | unknown | Oropharyngeal swab |
| hCoV-19/Mexico/CMX-INMEGEN-01-03-22/2021 | EPI_ISL_944632 | 14/01/21 | North America / Mexico / Mexico City | Human | Male   | 53 | unknown | Oropharyngeal swab |
| hCoV-19/Mexico/CMX-INMEGEN-01-03-23/2021 | EPI_ISL_944633 | 11/01/21 | North America / Mexico / Mexico City | Human | Female | 10 | unknown | Oropharyngeal swab |
| hCoV-19/Mexico/NLE-UANL-003/2021         | EPI_ISL_979340 | 02/01/21 | North America / Mexico / Nuevo Leon  | Human | Female | 25 | unknown |                    |
| hCoV-19/Mexico/NLE-UANL-006/2021         | EPI_ISL_979343 | 08/01/21 | North America / Mexico / Nuevo Leon  | Human | Female | 41 | unknown |                    |
| hCoV-19/Mexico/CMX-INMEGEN-01-02-16/2021 | EPI_ISL_985149 | 05/01/21 | North America / Mexico / Mexico City | Human | Female | 51 | unknown | Oropharyngeal swab |
| hCoV-19/Mexico/CMX-INMEGEN-01-02-04/2021 | EPI_ISL_985151 | 04/01/21 | North America / Mexico / Mexico City | Human | Female | 66 | unknown | Oropharyngeal swab |
| hCoV-19/Mexico/CMX-INMEGEN-01-02-18/2021 | EPI_ISL_985153 | 02/01/21 | North America / Mexico / Mexico City | Human | Male   | 14 | unknown | Oropharyngeal swab |
| hCoV-19/Mexico/CMX-INMEGEN-01-02-19/2021 | EPI_ISL_985154 | 02/01/21 | North America / Mexico / Mexico City | Human | Female | 28 | unknown | Oropharyngeal swab |
| hCoV-19/Mexico/CMX-INMEGEN-01-02-20/2021 | EPI_ISL_985155 | 02/01/21 | North America / Mexico / Mexico City | Human | Male   | 26 | unknown | Oropharyngeal swab |

**Table S4.** Sequences within the clusters identified in the haplotype network (C1-C5), with GISAID accession r

| Cluster | Virus name                                  | GISAID Accession | Collection date |
|---------|---------------------------------------------|------------------|-----------------|
| C1      | hCoV-19/Mexico/TAM-InDRE_F11757_S901/2021   | EPI_ISL_1423511  | 2021-03-10      |
| C1      | hCoV-19/Mexico/ROO_INER_IMSS_00436/2021     | EPI_ISL_1585444  | 2021-03-10      |
| C1      | hCoV-19/Mexico/NLE-InDRE_FB13201_S1495/2021 | EPI_ISL_1805473  | 2021-04-05      |
| C1      | hCoV-19/Mexico/NLE_INER_IMSS_00765/2021     | EPI_ISL_2091219  | 2021-04-15      |
| C1      | hCoV-19/Mexico/COA_LANGEBIO_IMSS_0592/2021  | EPI_ISL_2402011  | 2021-04-17      |
| C1      | hCoV-19/Mexico/TAM-InDRE_FB14051_S2073/2021 | EPI_ISL_2283713  | 2021-04-17      |
| C1      | hCoV-19/Mexico/NLE-UANL-075/2021            | EPI_ISL_1789699  | 2021-04-19      |
| C1      | hCoV-19/Mexico/TAM-InDRE_FB14054_S2075/2021 | EPI_ISL_2283715  | 2021-04-20      |
| C1      | hCoV-19/Mexico/TAM-InDRE_FB14700_S2045/2021 | EPI_ISL_2283687  | 2021-04-27      |
| C1      | hCoV-19/Mexico/TAB_INER_IMSS_1105/2021      | EPI_ISL_2490343  | 2021-04-28      |
| C1      | hCoV-19/Mexico/NLE_LANGEBIO_IMSS_0568/2021  | EPI_ISL_2401990  | 2021-04-28      |
| C1      | hCoV-19/Mexico/TAB_INER_IMSS_1124/2021      | EPI_ISL_2490346  | 2021-05-02      |
| C1      | hCoV-19/Mexico/HID-INMEGEN-05-02-179/2021   | EPI_ISL_2230885  | 2021-05-02      |
| C1      | hCoV-19/Mexico/NLE_INER_IMSS_1018/2021      | EPI_ISL_2490337  | 2021-05-02      |
| C1      | hCoV-19/Mexico/TAM-InDRE_FB14930_S2051/2021 | EPI_ISL_2283693  | 2021-05-04      |
| C1      | hCoV-19/Mexico/TAM-InDRE_FB14939_S2393/2021 | EPI_ISL_2455918  | 2021-05-05      |
| C1      | hCoV-19/Mexico/TAM-InDRE_FB15937_S2399/2021 | EPI_ISL_2455924  | 2021-05-07      |
| C1      | hCoV-19/Mexico/TAM-InDRE_FB15938_S2400/2021 | EPI_ISL_2455925  | 2021-05-07      |
| C1      | hCoV-19/Mexico/TAM-InDRE_FB15943_S2407/2021 | EPI_ISL_2455931  | 2021-05-07      |
| C1      | hCoV-19/Mexico/MEX-INMEGEN-05-03-4/2021     | EPI_ISL_2319174  | 2021-05-07      |
| C1      | hCoV-19/Mexico/TAM-InDRE_FB15942_S2406/2021 | EPI_ISL_2455930  | 2021-05-08      |
| C1      | hCoV-19/Mexico/TAM-InDRE_FB15955_S2409/2021 | EPI_ISL_2455933  | 2021-05-08      |
| C1      | hCoV-19/Mexico/NLE_INER_IMSS_1091/2021      | EPI_ISL_2490341  | 2021-05-11      |
| C1      | hCoV-19/Mexico/NLE_INER_IMSS_1102/2021      | EPI_ISL_2490342  | 2021-05-12      |
| C1      | hCoV-19/Mexico/TAM-InDRE_FB16017_S2416/2021 | EPI_ISL_2455940  | 2021-05-12      |
| C1      | hCoV-19/Mexico/TAM-InDRE_FB16024_S2423/2021 | EPI_ISL_2455947  | 2021-05-12      |
| C1      | hCoV-19/Mexico/TAM-InDRE_FB16033_S2432/2021 | EPI_ISL_2455956  | 2021-05-12      |
| C1      | hCoV-19/Mexico/TAM-InDRE_FB16326_S3938/2021 | EPI_ISL_2858952  | 2021-05-14      |
| C1      | hCoV-19/Mexico/TAM-InDRE_FB16329_S3939/2021 | EPI_ISL_2858953  | 2021-05-14      |
| C1      | hCoV-19/Mexico/TAM-InDRE_FB16014_S2413/2021 | EPI_ISL_2455937  | 2021-05-15      |
| C1      | hCoV-19/Mexico/TAM-InDRE_FB16016_S2415/2021 | EPI_ISL_2455939  | 2021-05-17      |
| C1      | hCoV-19/Mexico/TAM-InDRE_FB16020_S2419/2021 | EPI_ISL_2455943  | 2021-05-17      |
| C1      | hCoV-19/Mexico/TAM-LANGEBIO_IMSS_0849/2021  | EPI_ISL_2671717  | 2021-05-18      |
| C1      | hCoV-19/Mexico/NLE-InDRE_FB16191_S2464/2021 | EPI_ISL_2455985  | 2021-05-19      |
| C1      | hCoV-19/Mexico/TAM-LANGEBIO_IMSS_0854/2021  | EPI_ISL_2671718  | 2021-05-19      |
| C1      | hCoV-19/Mexico/SLP-InDRE_FB16823_S2780/2021 | EPI_ISL_2533806  | 2021-05-19      |
| C1      | hCoV-19/Mexico/TAM-InDRE_FB16726_S2771/2021 | EPI_ISL_2533797  | 2021-05-20      |
| C1      | hCoV-19/Mexico/TAM-InDRE_FB16733_S2774/2021 | EPI_ISL_2533800  | 2021-05-20      |
| C1      | hCoV-19/Mexico/NLE-LANGEBIO_IMSS_0851/2021  | EPI_ISL_2671631  | 2021-05-20      |
| C1      | hCoV-19/Mexico/CMX-InDRE_FD72271_S3091/2021 | EPI_ISL_2663358  | 2021-05-21      |
| C1      | hCoV-19/Mexico/TAM-InDRE_FB16728_S2773/2021 | EPI_ISL_2533799  | 2021-05-21      |

|    |                                             |                 |            |
|----|---------------------------------------------|-----------------|------------|
| C1 | hCoV-19/Mexico/TAB-InDRE_FB18330_S3970/2021 | EPI_ISL_2858984 | 2021-05-22 |
| C1 | hCoV-19/Mexico/TAB-InDRE_FB18331_S3971/2021 | EPI_ISL_2858985 | 2021-05-22 |
| C1 | hCoV-19/Mexico/TAB-InDRE_FB18332_S3972/2021 | EPI_ISL_2858986 | 2021-05-22 |
| C1 | hCoV-19/Mexico/CMX-InDRE_FB16521_S3061/2021 | EPI_ISL_2663328 | 2021-05-25 |
| C1 | hCoV-19/Mexico/TAM-InDRE_FB16734_S2775/2021 | EPI_ISL_2533801 | 2021-05-25 |
| C1 | hCoV-19/Mexico/TAM-LANGEBIO_IMSS_0884/2021  | EPI_ISL_2671722 | 2021-05-25 |
| C1 | hCoV-19/Mexico/ROO_IBT_IMSS_1729/2021       | EPI_ISL_2681233 | 2021-05-28 |
| C1 | hCoV-19/Mexico/TAM-InDRE_FB17060_S3083/2021 | EPI_ISL_2663350 | 2021-05-28 |
| C1 | hCoV-19/Mexico/TAB-InDRE_FB16513_S2742/2021 | EPI_ISL_2533768 | 2021-05-29 |
| C1 | hCoV-19/Mexico/TAB-InDRE_FB16514_S2743/2021 | EPI_ISL_2533769 | 2021-05-29 |
| C1 | hCoV-19/Mexico/CMX-INMEGEN-05-06-369/2021   | EPI_ISL_2603813 | 2021-05-29 |
| C1 | hCoV-19/Mexico/TAM-InDRE_FB17076_S3133/2021 | EPI_ISL_2663400 | 2021-05-31 |
| C1 | hCoV-19/Mexico/TAM-InDRE_FB17077_S3134/2021 | EPI_ISL_2663401 | 2021-05-31 |
| C1 | hCoV-19/USA/WY-WYPHL21038401/2021           | EPI_ISL_2442344 | 2021-06-01 |
| C1 | hCoV-19/Mexico/TAB-INMEGEN-05-06-245/2021   | EPI_ISL_2603720 | 2021-06-01 |
| C1 | hCoV-19/Mexico/TAB-INMEGEN-05-06-253/2021   | EPI_ISL_2603724 | 2021-06-01 |
| C1 | hCoV-19/Mexico/TAB-INMEGEN-05-06-261/2021   | EPI_ISL_2603732 | 2021-06-01 |
| C1 | hCoV-19/Mexico/TAB-InDRE_FB16926_S3069/2021 | EPI_ISL_2663336 | 2021-06-01 |
| C1 | hCoV-19/Mexico/TAB-InDRE_FB16929_S3070/2021 | EPI_ISL_2663337 | 2021-06-01 |
| C1 | hCoV-19/Mexico/YUC-INMEGEN-05-06-269/2021   | EPI_ISL_2603739 | 2021-06-01 |
| C1 | hCoV-19/Mexico/YUC-InDRE_FB17499_S3498/2021 | EPI_ISL_2779013 | 2021-06-01 |
| C1 | hCoV-19/Mexico/NLE_IBT_IMSS_1415/2021       | EPI_ISL_2681197 | 2021-06-01 |
| C1 | hCoV-19/Mexico/CHH_IBT_IMSS_1444/2021       | EPI_ISL_2681104 | 2021-06-01 |
| C1 | hCoV-19/Mexico/NLE_IBT_IMSS_1404/2021       | EPI_ISL_2681127 | 2021-06-01 |
| C1 | hCoV-19/Mexico/TAM-InDRE_FB17466_S3488/2021 | EPI_ISL_2779003 | 2021-06-02 |
| C1 | hCoV-19/Mexico/NLE_IBT_IMSS_1426/2021       | EPI_ISL_2681102 | 2021-06-02 |
| C1 | hCoV-19/Mexico/NLE-InDRE_FB16961_S3124/2021 | EPI_ISL_2663391 | 2021-06-02 |
| C1 | hCoV-19/Mexico/CHH_IBT_IMSS_1443/2021       | EPI_ISL_2681219 | 2021-06-02 |
| C1 | hCoV-19/Mexico/NLE_IBT_IMSS_1418/2021       | EPI_ISL_2681096 | 2021-06-02 |
| C1 | hCoV-19/Mexico/NLE-InDRE_FB18317_S3969/2021 | EPI_ISL_2858983 | 2021-06-02 |
| C1 | hCoV-19/Mexico/TAB-InDRE_FB16944_S3072/2021 | EPI_ISL_2663339 | 2021-06-03 |
| C1 | hCoV-19/Mexico/MEX-INMEGEN-06-03-160/2021   | EPI_ISL_2810147 | 2021-06-03 |
| C1 | hCoV-19/Mexico/NLE-InDRE_FB16964_S3125/2021 | EPI_ISL_2663392 | 2021-06-03 |
| C1 | hCoV-19/Mexico/TAB-InDRE_FB17013_S3079/2021 | EPI_ISL_2663346 | 2021-06-04 |
| C1 | hCoV-19/Mexico/TAB-InDRE_FB17014_S3080/2021 | EPI_ISL_2663347 | 2021-06-04 |
| C1 | hCoV-19/Mexico/TAB-INMEGEN-06-01-364/2021   | EPI_ISL_2616972 | 2021-06-04 |
| C1 | hCoV-19/Mexico/YUC-InDRE_FB17531_S3503/2021 | EPI_ISL_2779018 | 2021-06-04 |
| C1 | hCoV-19/Mexico/NLE-IBT_IMSS_1774/2021       | EPI_ISL_2801667 | 2021-06-04 |
| C1 | hCoV-19/Mexico/TAM-InDRE_FB17423_S3928/2021 | EPI_ISL_2858942 | 2021-06-05 |
| C1 | hCoV-19/Mexico/TAB-InDRE_FB17020_S3081/2021 | EPI_ISL_2663348 | 2021-06-05 |
| C1 | hCoV-19/Mexico/TAB-INMEGEN-06-02-102/2021   | EPI_ISL_2692630 | 2021-06-07 |
| C1 | hCoV-19/Mexico/TAB-INMEGEN-06-02-158/2021   | EPI_ISL_2692674 | 2021-06-07 |
| C1 | hCoV-19/Mexico/TAB-InDRE_FB17043_S3082/2021 | EPI_ISL_2663349 | 2021-06-07 |
| C1 | hCoV-19/Mexico/TAB-InDRE_FB17030_S3084/2021 | EPI_ISL_2663351 | 2021-06-07 |
| C1 | hCoV-19/Mexico/TAM-InDRE_FB17425_S3929/2021 | EPI_ISL_2858943 | 2021-06-07 |

|    |                                             |                 |            |
|----|---------------------------------------------|-----------------|------------|
| C1 | hCoV-19/Mexico/NLE-IBT_IMSS_1796/2021       | EPI_ISL_2801675 | 2021-06-07 |
| C1 | hCoV-19/Mexico/BCN-IBT_IMSS_2033/2021       | EPI_ISL_2801878 | 2021-06-08 |
| C1 | hCoV-19/Mexico/TAM-InDRE_FB17463_S3487/2021 | EPI_ISL_2779002 | 2021-06-08 |
| C1 | hCoV-19/Mexico/TAM-InDRE_FB17471_S3489/2021 | EPI_ISL_2779004 | 2021-06-08 |
| C1 | hCoV-19/Mexico/NLE-IBT_IMSS_1786/2021       | EPI_ISL_2801670 | 2021-06-08 |
| C1 | hCoV-19/Mexico/TAM-IBT_IMSS_1792/2021       | EPI_ISL_2801673 | 2021-06-08 |
| C1 | hCoV-19/Mexico/NLE-InDRE_FB17366_S3922/2021 | EPI_ISL_2858936 | 2021-06-08 |
| C1 | hCoV-19/Mexico/TAM-InDRE_FB18138_S4125/2021 | EPI_ISL_2920696 | 2021-06-09 |
| C1 | hCoV-19/Mexico/TAB-InDRE_FB17298_S3469/2021 | EPI_ISL_2778984 | 2021-06-09 |
| C1 | hCoV-19/Mexico/TAB-InDRE_FB17301_S3472/2021 | EPI_ISL_2778987 | 2021-06-09 |
| C1 | hCoV-19/Mexico/TAB-INMEGEN-06-03-352/2021   | EPI_ISL_2810305 | 2021-06-09 |
| C1 | hCoV-19/Mexico/TAB-INMEGEN-06-03-360/2021   | EPI_ISL_2810312 | 2021-06-09 |
| C1 | hCoV-19/Mexico/TAM-InDRE_FB18105_S3954/2021 | EPI_ISL_2858968 | 2021-06-09 |
| C1 | hCoV-19/Mexico/TAB-InDRE_FB17315_S3473/2021 | EPI_ISL_2778988 | 2021-06-10 |
| C1 | hCoV-19/Mexico/ROO-INMEGEN-06-04-54/2021    | EPI_ISL_2894198 | 2021-06-10 |
| C1 | hCoV-19/Mexico/TAB-InDRE_FB17796_S3528/2021 | EPI_ISL_2779043 | 2021-06-10 |
| C1 | hCoV-19/Mexico/YUC-INMEGEN-06-04-289/2021   | EPI_ISL_2894336 | 2021-06-10 |
| C1 | hCoV-19/Mexico/NLE-IBT_IMSS_1809/2021       | EPI_ISL_2801685 | 2021-06-10 |
| C1 | hCoV-19/Mexico/NLE-InDRE_FB17368_S3923/2021 | EPI_ISL_2858937 | 2021-06-10 |
| C1 | hCoV-19/Mexico/ROO-INMEGEN-06-04-316/2021   | EPI_ISL_2894363 | 2021-06-11 |
| C1 | hCoV-19/Mexico/TAB-InDRE_FB17680_S3513/2021 | EPI_ISL_2779028 | 2021-06-11 |
| C1 | hCoV-19/Mexico/TAB-InDRE_FB17801_S3530/2021 | EPI_ISL_2779045 | 2021-06-11 |
| C1 | hCoV-19/Mexico/YUC-INMEGEN-06-04-308/2021   | EPI_ISL_2894355 | 2021-06-11 |
| C1 | hCoV-19/Mexico/TAM-InDRE_FB18134_S4123/2021 | EPI_ISL_2920694 | 2021-06-12 |
| C1 | hCoV-19/Mexico/TAB-InDRE_FB17673_S3509/2021 | EPI_ISL_2779024 | 2021-06-12 |
| C1 | hCoV-19/Mexico/TAB-InDRE_FB17674_S3510/2021 | EPI_ISL_2779025 | 2021-06-12 |
| C1 | hCoV-19/Mexico/TAB-InDRE_FB17675_S3511/2021 | EPI_ISL_2779026 | 2021-06-12 |
| C1 | hCoV-19/Mexico/TAB-InDRE_FB17677_S3512/2021 | EPI_ISL_2779027 | 2021-06-12 |
| C1 | hCoV-19/Mexico/YUC-INMEGEN-06-04-296/2021   | EPI_ISL_2894343 | 2021-06-12 |
| C1 | hCoV-19/Mexico/YUC-INMEGEN-06-04-293/2021   | EPI_ISL_2894340 | 2021-06-12 |
| C1 | hCoV-19/Mexico/TAM-InDRE_FB18133_S4122/2021 | EPI_ISL_2920693 | 2021-06-13 |
| C1 | hCoV-19/Mexico/YUC-INMEGEN-06-04-345/2021   | EPI_ISL_2894389 | 2021-06-13 |
| C1 | hCoV-19/Mexico/YUC-INMEGEN-06-04-348/2021   | EPI_ISL_2894392 | 2021-06-13 |
| C1 | hCoV-19/Mexico/YUC-INMEGEN-06-04-349/2021   | EPI_ISL_2894393 | 2021-06-13 |
| C1 | hCoV-19/Mexico/TAM-InDRE_FB18098_S3951/2021 | EPI_ISL_2858965 | 2021-06-14 |
| C1 | hCoV-19/Mexico/TAB-InDRE_FB17687_S3514/2021 | EPI_ISL_2779029 | 2021-06-14 |
| C1 | hCoV-19/Mexico/TAB-InDRE_FB17689_S3516/2021 | EPI_ISL_2779031 | 2021-06-14 |
| C1 | hCoV-19/Mexico/TAB-InDRE_FB17693_S3517/2021 | EPI_ISL_2779032 | 2021-06-14 |
| C1 | hCoV-19/Mexico/TAB-InDRE_FB17694_S3518/2021 | EPI_ISL_2779033 | 2021-06-14 |
| C1 | hCoV-19/Mexico/TAB-InDRE_FB17798_S3529/2021 | EPI_ISL_2779044 | 2021-06-14 |
| C1 | hCoV-19/Mexico/TAB-INMEGEN-16-306/2021      | EPI_ISL_2978616 | 2021-06-14 |
| C1 | hCoV-19/Mexico/YUC-Biomedicos-6140701/2021  | EPI_ISL_2918940 | 2021-06-14 |
| C1 | hCoV-19/Mexico/TAM-InDRE_FB18106_S3955/2021 | EPI_ISL_2858969 | 2021-06-14 |
| C1 | hCoV-19/Mexico/TAM-InDRE_FB18137_S4124/2021 | EPI_ISL_2920695 | 2021-06-14 |
| C1 | hCoV-19/Mexico/TAM-InDRE_FB18911_S4474/2021 | EPI_ISL_3033328 | 2021-06-14 |

|    |                                             |                 |            |
|----|---------------------------------------------|-----------------|------------|
| C1 | hCoV-19/Mexico/TAM-InDRE_FB18912_S4475/2021 | EPI_ISL_3033329 | 2021-06-14 |
| C1 | hCoV-19/Mexico/NLE-InDRE_FB18090_S4118/2021 | EPI_ISL_2920689 | 2021-06-14 |
| C1 | hCoV-19/Mexico/NLE-InDRE_FB18085_S4117/2021 | EPI_ISL_2920688 | 2021-06-15 |
| C1 | hCoV-19/Mexico/TAM-InDRE_FB18142_S4126/2021 | EPI_ISL_2920697 | 2021-06-15 |
| C1 | hCoV-19/Mexico/TAM-InDRE_FB18143_S4127/2021 | EPI_ISL_2920698 | 2021-06-15 |
| C1 | hCoV-19/Mexico/TAM-InDRE_FB18145_S4129/2021 | EPI_ISL_2920700 | 2021-06-15 |
| C1 | hCoV-19/Mexico/TAM-InDRE_FB18103_S3952/2021 | EPI_ISL_2858966 | 2021-06-15 |
| C1 | hCoV-19/Mexico/TAM-InDRE_FB18104_S3953/2021 | EPI_ISL_2858967 | 2021-06-15 |
| C1 | hCoV-19/Mexico/TAM-InDRE_FB18115_S3956/2021 | EPI_ISL_2858970 | 2021-06-15 |
| C1 | hCoV-19/Mexico/NLE-InDRE_FB18082_S4116/2021 | EPI_ISL_2920687 | 2021-06-15 |
| C1 | hCoV-19/Mexico/NLE-InDRE_FB18093_S4119/2021 | EPI_ISL_2920690 | 2021-06-15 |
| C1 | hCoV-19/Mexico/CHH-LANGEBIO_IMSS_1366/2021  | EPI_ISL_2942497 | 2021-06-16 |
| C1 | hCoV-19/Mexico/TAM-LANGEBIO_IMSS_1368/2021  | EPI_ISL_2942498 | 2021-06-16 |
| C1 | hCoV-19/Mexico/TAM-InDRE_FB18146_S4130/2021 | EPI_ISL_2920701 | 2021-06-16 |
| C1 | hCoV-19/Mexico/CAM-InDRE_FB18927_S4478/2021 | EPI_ISL_3033332 | 2021-06-16 |
| C1 | hCoV-19/Mexico/TAB-InDRE_FB17995_S3943/2021 | EPI_ISL_2858957 | 2021-06-16 |
| C1 | hCoV-19/Mexico/TAB-InDRE_FB17999_S3944/2021 | EPI_ISL_2858958 | 2021-06-16 |
| C1 | hCoV-19/Mexico/SLP-InDRE_FB18343_S3975/2021 | EPI_ISL_2858989 | 2021-06-16 |
| C1 | hCoV-19/Mexico/TAM-InDRE_FB18116_S3957/2021 | EPI_ISL_2858971 | 2021-06-16 |
| C1 | hCoV-19/Mexico/TAM-InDRE_FB18896_S4159/2021 | EPI_ISL_2920730 | 2021-06-17 |
| C1 | hCoV-19/Mexico/TAB-InDRE_FB18008_S3945/2021 | EPI_ISL_2858959 | 2021-06-17 |
| C1 | hCoV-19/Mexico/TAB-InDRE_FB18030_S3948/2021 | EPI_ISL_2858962 | 2021-06-17 |
| C1 | hCoV-19/Mexico/NLE-LANGEBIO_IMSS_1355/2021  | EPI_ISL_2942486 | 2021-06-17 |
| C1 | hCoV-19/Mexico/SON-InDRE_FB18274_S4135/2021 | EPI_ISL_2920706 | 2021-06-17 |
| C1 | hCoV-19/Mexico/TAM-InDRE_FB18878_S4155/2021 | EPI_ISL_2920726 | 2021-06-18 |
| C1 | hCoV-19/Mexico/TAM-InDRE_FB18879_S4156/2021 | EPI_ISL_2920727 | 2021-06-18 |
| C1 | hCoV-19/Mexico/CAM-LANGEBIO_IMSS_1190/2021  | EPI_ISL_2942351 | 2021-06-18 |
| C1 | hCoV-19/Mexico/TAB-InDRE_FB18032_S3949/2021 | EPI_ISL_2858963 | 2021-06-18 |
| C1 | hCoV-19/Mexico/TAM-InDRE_FB18898_S4469/2021 | EPI_ISL_3033323 | 2021-06-18 |
| C1 | hCoV-19/Mexico/TAM-InDRE_FB18905_S4471/2021 | EPI_ISL_3033325 | 2021-06-18 |
| C1 | hCoV-19/Mexico/TAB-InDRE_FB18051_S3950/2021 | EPI_ISL_2858964 | 2021-06-19 |
| C1 | hCoV-19/Mexico/TAM-InDRE_FB18910_S4473/2021 | EPI_ISL_3033327 | 2021-06-21 |
| C1 | hCoV-19/Mexico/TAB-InDRE_FB18197_S3962/2021 | EPI_ISL_2858976 | 2021-06-21 |
| C1 | hCoV-19/Mexico/TAB-InDRE_FB18207_S3963/2021 | EPI_ISL_2858977 | 2021-06-21 |
| C1 | hCoV-19/Mexico/TAM-InDRE_FB18909_S4472/2021 | EPI_ISL_3033326 | 2021-06-21 |
| C1 | hCoV-19/Mexico/TAM-InDRE_FB18890_S4157/2021 | EPI_ISL_2920728 | 2021-06-22 |
| C1 | hCoV-19/Mexico/TAM-InDRE_FB18891_S4158/2021 | EPI_ISL_2920729 | 2021-06-22 |
| C1 | hCoV-19/Mexico/YUC-Biomedicos-6220333/2021  | EPI_ISL_2928304 | 2021-06-22 |
| C1 | hCoV-19/Mexico/TAM-InDRE_FB18922_S4476/2021 | EPI_ISL_3033330 | 2021-06-22 |
| C1 | hCoV-19/Mexico/TAM-InDRE_FB18925_S4477/2021 | EPI_ISL_3033331 | 2021-06-23 |
| C1 | hCoV-19/Mexico/TAB-LANGEBIO_IMSS_1519/2021  | EPI_ISL_2942632 | 2021-06-23 |
| C1 | hCoV-19/Mexico/TAB-InDRE_FB18381_S4143/2021 | EPI_ISL_2920714 | 2021-06-23 |
| C1 | hCoV-19/Mexico/TAB-InDRE_FB18382_S4144/2021 | EPI_ISL_2920715 | 2021-06-23 |
| C1 | hCoV-19/Mexico/TAB-InDRE_FB18389_S4145/2021 | EPI_ISL_2920716 | 2021-06-23 |
| C1 | hCoV-19/Mexico/TAB-INMEGEN-17-128/2021      | EPI_ISL_3067913 | 2021-06-23 |



|    |                                             |                 |            |
|----|---------------------------------------------|-----------------|------------|
| C1 | hCoV-19/Mexico/YUC-InDRE_FB19014_S4486/2021 | EPI_ISL_3033340 | 2021-06-23 |
| C1 | hCoV-19/Mexico/TAB-LANGEBIO_IMSS_1539/2021  | EPI_ISL_2942650 | 2021-06-24 |
| C1 | hCoV-19/Mexico/YUC-LANGEBIO_IMSS_1245/2021  | EPI_ISL_2942406 | 2021-06-24 |
| C1 | hCoV-19/Mexico/COA-LANGEBIO_IMSS_1377/2021  | EPI_ISL_2942505 | 2021-06-24 |
| C1 | hCoV-19/Mexico/MEX-INMEGEN-06-03-62/2021    | EPI_ISL_2810072 | 2021-06-24 |
| C1 | hCoV-19/Mexico/SLP-LANGEBIO_IMSS_1333/2021  | EPI_ISL_2942476 | 2021-06-24 |
| C1 | hCoV-19/Mexico/TAB-InDRE_FB18526_S4150/2021 | EPI_ISL_2920721 | 2021-06-25 |
| C1 | hCoV-19/Mexico/TAB-InDRE_FB18527_S4151/2021 | EPI_ISL_2920722 | 2021-06-25 |
| C1 | hCoV-19/Mexico/TAB-InDRE_FB18528_S4152/2021 | EPI_ISL_2920723 | 2021-06-25 |
| C1 | hCoV-19/Mexico/CMX-INMEGEN-16-21/2021       | EPI_ISL_2978376 | 2021-06-26 |
| C1 | hCoV-19/Mexico/CAM-LANGEBIO_IMSS_1571/2021  | EPI_ISL_2942682 | 2021-06-26 |
| C1 | hCoV-19/Mexico/ROO-LANGEBIO_IMSS_1545/2021  | EPI_ISL_2942656 | 2021-06-26 |
| C1 | hCoV-19/Mexico/TAM-LANGEBIO_IMSS_1671/2021  | EPI_ISL_2942764 | 2021-06-26 |
| C1 | hCoV-19/Mexico/TAB-InDRE_FB19065_S4488/2021 | EPI_ISL_3033342 | 2021-06-28 |
| C1 | hCoV-19/Mexico/TAB-InDRE_FB19070_S4489/2021 | EPI_ISL_3033343 | 2021-06-28 |
| C1 | hCoV-19/Mexico/TAB-InDRE_FB19071_S4490/2021 | EPI_ISL_3033344 | 2021-06-28 |
| C1 | hCoV-19/Mexico/MEX-INMEGEN-06-04-375/2021   | EPI_ISL_2894414 | 2021-06-28 |
| C1 | hCoV-19/Mexico/NLE-LANGEBIO_IMSS_1666/2021  | EPI_ISL_2942762 | 2021-06-28 |
| C1 | hCoV-19/Mexico/TAB-InDRE_FB19319_S4504/2021 | EPI_ISL_3033358 | 2021-06-29 |
| C1 | hCoV-19/Mexico/TAB-InDRE_FB19500_S4511/2021 | EPI_ISL_3033364 | 2021-07-01 |
| C1 | hCoV-19/Mexico/NLE-LANGEBIO_IMSS_1680/2021  | EPI_ISL_2942771 | 2021-07-01 |
| C1 | hCoV-19/Mexico/TAB-InDRE_FB19673_S4516/2021 | EPI_ISL_3033369 | 2021-07-02 |
| C1 | hCoV-19/Mexico/NLE-LANGEBIO_IMSS_1688/2021  | EPI_ISL_2942778 | 2021-07-02 |
| C1 | hCoV-19/Mexico/CMX-INMEGEN-16-75/2021       | EPI_ISL_2978423 | 2021-07-05 |
| C1 | hCoV-19/Mexico/MEX-INMEGEN-16-263/2021      | EPI_ISL_2978577 | 2021-07-05 |
| C2 | hCoV-19/Mexico/YUC-NYGC-15751-21/2021       | EPI_ISL_3024024 | 2021-03-30 |
| C2 | hCoV-19/USA/MD-HP03801/2021                 | EPI_ISL_1468608 | 2021-04-01 |
| C2 | hCoV-19/Mexico/ROO-InDRE_FB12917_S1492/2021 | EPI_ISL_1805470 | 2021-04-02 |
| C2 | hCoV-19/Mexico/ROO_INER_IMSS_00791/2021     | EPI_ISL_2091244 | 2021-04-08 |
| C2 | hCoV-19/Mexico/YUC-InDRE_FB15328_S2079/2021 | EPI_ISL_2283719 | 2021-04-08 |
| C2 | hCoV-19/Mexico/YUC_INER_IMSS_1108/2021      | EPI_ISL_2490344 | 2021-04-29 |
| C2 | hCoV-19/Mexico/YUC-InDRE_FB16589_S2750/2021 | EPI_ISL_2533776 | 2021-05-18 |
| C2 | hCoV-19/Mexico/YUC-InDRE_FB16598_S2751/2021 | EPI_ISL_2533777 | 2021-05-19 |
| C2 | hCoV-19/Mexico/YUC-InDRE_FB16661_S2761/2021 | EPI_ISL_2533787 | 2021-05-24 |
| C2 | hCoV-19/Mexico/YUC-InDRE_FB16666_S2763/2021 | EPI_ISL_2533789 | 2021-05-25 |
| C2 | hCoV-19/Mexico/CMX-INMEGEN-05-06-280/2021   | EPI_ISL_2603749 | 2021-05-28 |
| C2 | hCoV-19/Mexico/VER_IBT_IMSS_1664/2021       | EPI_ISL_2681180 | 2021-05-30 |
| C2 | hCoV-19/Mexico/VER-INMEGEN-05-06-254/2021   | EPI_ISL_2603725 | 2021-05-31 |
| C2 | hCoV-19/Mexico/YUC-INMEGEN-05-06-196/2021   | EPI_ISL_2603685 | 2021-05-31 |
| C2 | hCoV-19/Mexico/YUC_IBT_IMSS_1727/2021       | EPI_ISL_2681108 | 2021-06-01 |
| C2 | hCoV-19/Mexico/YUC-INMEGEN-05-06-222/2021   | EPI_ISL_2603706 | 2021-06-01 |
| C2 | hCoV-19/Mexico/YUC-INMEGEN-05-06-277/2021   | EPI_ISL_2603746 | 2021-06-01 |
| C2 | hCoV-19/Mexico/YUC-InDRE_FB17487_S3495/2021 | EPI_ISL_2779010 | 2021-06-01 |
| C2 | hCoV-19/Mexico/YUC-InDRE_FB17495_S3496/2021 | EPI_ISL_2779011 | 2021-06-01 |
| C2 | hCoV-19/Mexico/YUC-InDRE_FB17511_S3501/2021 | EPI_ISL_2779016 | 2021-06-02 |

|    |                                             |                 |            |
|----|---------------------------------------------|-----------------|------------|
| C2 | hCoV-19/Mexico/YUC-INMEGEN-06-01-299/2021   | EPI_ISL_2616968 | 2021-06-03 |
| C2 | hCoV-19/Mexico/YUC-INMEGEN-06-01-330/2021   | EPI_ISL_2616970 | 2021-06-03 |
| C2 | hCoV-19/Mexico/VER-INMEGEN-06-01-368/2021   | EPI_ISL_2616973 | 2021-06-05 |
| C2 | hCoV-19/Mexico/YUC-INMEGEN-06-02-18/2021    | EPI_ISL_2692555 | 2021-06-05 |
| C2 | hCoV-19/Mexico/YUC-IBT_IMSS_2027/2021       | EPI_ISL_2801600 | 2021-06-05 |
| C2 | hCoV-19/Mexico/YUC-INMEGEN-06-02-65/2021    | EPI_ISL_2692597 | 2021-06-05 |
| C2 | hCoV-19/Mexico/YUC-INMEGEN-06-02-136/2021   | EPI_ISL_2692657 | 2021-06-07 |
| C2 | hCoV-19/Mexico/YUC-INMEGEN-06-02-160/2021   | EPI_ISL_2692676 | 2021-06-07 |
| C2 | hCoV-19/Mexico/YUC-INMEGEN-06-02-168/2021   | EPI_ISL_2692684 | 2021-06-07 |
| C2 | hCoV-19/Mexico/YUC-INMEGEN-06-02-184/2021   | EPI_ISL_2692697 | 2021-06-07 |
| C2 | hCoV-19/Mexico/YUC-InDRE_FB17561_S3505/2021 | EPI_ISL_2779020 | 2021-06-07 |
| C2 | hCoV-19/Mexico/MEX-LANGEBIO_IMSS_1479/2021  | EPI_ISL_2942596 | 2021-06-08 |
| C2 | hCoV-19/Mexico/VER-INMEGEN-06-02-173/2021   | EPI_ISL_2692689 | 2021-06-08 |
| C2 | hCoV-19/Mexico/YUC-INMEGEN-06-02-141/2021   | EPI_ISL_2692662 | 2021-06-08 |
| C2 | hCoV-19/Mexico/YUC-INMEGEN-06-02-165/2021   | EPI_ISL_2692681 | 2021-06-08 |
| C2 | hCoV-19/Mexico/YUC-InDRE_FB17570_S3506/2021 | EPI_ISL_2779021 | 2021-06-08 |
| C2 | hCoV-19/Mexico/VER-INMEGEN-06-02-373/2021   | EPI_ISL_2692849 | 2021-06-09 |
| C2 | hCoV-19/Mexico/YUC-InDRE_FB17577_S3507/2021 | EPI_ISL_2779022 | 2021-06-09 |
| C2 | hCoV-19/Mexico/VER-InDRE_FB17431_S3930/2021 | EPI_ISL_2858944 | 2021-06-12 |
| C2 | hCoV-19/Mexico/YUC-INMEGEN-06-04-299/2021   | EPI_ISL_2894346 | 2021-06-12 |
| C2 | hCoV-19/Mexico/YUC-INMEGEN-06-04-310/2021   | EPI_ISL_2894357 | 2021-06-12 |
| C2 | hCoV-19/Mexico/YUC-INMEGEN-06-04-338/2021   | EPI_ISL_2894382 | 2021-06-12 |
| C2 | hCoV-19/Mexico/VER-INMEGEN-17-108/2021      | EPI_ISL_3067910 | 2021-06-13 |
| C2 | hCoV-19/Mexico/CMX-INMEGEN-06-02-203/2021   | EPI_ISL_2692715 | 2021-06-14 |
| C2 | hCoV-19/Mexico/VER-INMEGEN-16-284/2021      | EPI_ISL_2978595 | 2021-06-14 |
| C2 | hCoV-19/Mexico/YUC-INMEGEN-17-115/2021      | EPI_ISL_3067912 | 2021-06-14 |
| C2 | hCoV-19/Mexico/YUC-INMEGEN-17-118/2021      | EPI_ISL_3067917 | 2021-06-14 |
| C2 | hCoV-19/Mexico/YUC-InDRE_FB18962_S4482/2021 | EPI_ISL_3033336 | 2021-06-15 |
| C2 | hCoV-19/Mexico/YUC-InDRE_FB18966_S4483/2021 | EPI_ISL_3033337 | 2021-06-15 |
| C2 | hCoV-19/Mexico/VER-LANGEBIO_IMSS_1426/2021  | EPI_ISL_2942550 | 2021-06-20 |
| C2 | hCoV-19/Mexico/CAM-LANGEBIO_IMSS_1228/2021  | EPI_ISL_2942389 | 2021-06-21 |
| C2 | hCoV-19/Mexico/HID-InDRE_FB19125_S4493/2021 | EPI_ISL_3033347 | 2021-06-21 |
| C2 | hCoV-19/Mexico/YUC-InDRE_FB19001_S4484/2021 | EPI_ISL_3033338 | 2021-06-22 |
| C2 | hCoV-19/Mexico/YUC-InDRE_FB19002_S4485/2021 | EPI_ISL_3033339 | 2021-06-22 |
| C2 | hCoV-19/Mexico/VER-INMEGEN-17-185/2021      | EPI_ISL_3067915 | 2021-06-23 |
| C2 | hCoV-19/Mexico/VER-LANGEBIO_IMSS_1750/2021  | EPI_ISL_2942831 | 2021-06-24 |
| C2 | hCoV-19/Mexico/HID-InDRE_FB19139_S4498/2021 | EPI_ISL_3033352 | 2021-06-25 |
| C2 | hCoV-19/Mexico/YUC-LANGEBIO_IMSS_1562/2021  | EPI_ISL_2942673 | 2021-06-28 |
| C3 | hCoV-19/Mexico/TAM-InDRE_244/2021           | EPI_ISL_1008713 | 2021-01-26 |
| C3 | hCoV-19/Costa_Rica/INC-0265/2021            | EPI_ISL_1067587 | 2021-02    |
| C3 | hCoV-19/Mexico/TAM-InDRE_F86L_S567/2021     | EPI_ISL_1334380 | 2021-02-17 |
| C3 | hCoV-19/Mexico/TAM-InDRE_F108L_S569/2021    | EPI_ISL_1334382 | 2021-02-24 |
| C3 | hCoV-19/Mexico/TAM-InDRE_F111L_S570/2021    | EPI_ISL_1334383 | 2021-03-01 |
| C3 | hCoV-19/Mexico/TAM-InDRE_F112L_S571/2021    | EPI_ISL_1334384 | 2021-03-01 |
| C3 | hCoV-19/Mexico/TAM_LANGEBIO_IMSS_0049/2021  | EPI_ISL_1351540 | 2021-03-03 |

|    |                                             |                 |            |
|----|---------------------------------------------|-----------------|------------|
| C3 | hCoV-19/Mexico/NLE-InDRE_FB13119_S1506/2021 | EPI_ISL_1805484 | 2021-03-26 |
| C3 | hCoV-19/Mexico/TAM-InDRE_FB14060_S2076/2021 | EPI_ISL_2283716 | 2021-04-16 |
| C3 | hCoV-19/Mexico/VER_IBT_IMSS_1146/2021       | EPI_ISL_2391570 | 2021-04-22 |
| C3 | hCoV-19/Mexico/NLE_LANGEBIO_IMSS_0554/2021  | EPI_ISL_2401977 | 2021-04-27 |
| C3 | hCoV-19/Mexico/TAM-InDRE_FB15935_S2398/2021 | EPI_ISL_2455923 | 2021-05-06 |
| C3 | hCoV-19/Mexico/TAM-InDRE_FB15944_S2408/2021 | EPI_ISL_2455932 | 2021-05-08 |
| C3 | hCoV-19/Mexico/CMX-INER-IBT-0226/2021       | EPI_ISL_2490585 | 2021-05-11 |
| C3 | hCoV-19/Mexico/TAM-InDRE_FB16018_S2417/2021 | EPI_ISL_2455941 | 2021-05-12 |
| C3 | hCoV-19/Mexico/TAM-InDRE_FB16019_S2418/2021 | EPI_ISL_2455942 | 2021-05-12 |
| C3 | hCoV-19/Mexico/TAM-InDRE_FB16025_S2424/2021 | EPI_ISL_2455948 | 2021-05-12 |
| C3 | hCoV-19/Mexico/TAM-InDRE_FB16022_S2421/2021 | EPI_ISL_2455945 | 2021-05-13 |
| C3 | hCoV-19/Mexico/TAM-InDRE_FB16027_S2426/2021 | EPI_ISL_2455950 | 2021-05-13 |
| C3 | hCoV-19/Mexico/TAM-InDRE_FB16013_S2412/2021 | EPI_ISL_2455936 | 2021-05-14 |
| C3 | hCoV-19/Mexico/TAM-InDRE_FB16026_S2425/2021 | EPI_ISL_2455949 | 2021-05-15 |
| C3 | hCoV-19/Mexico/TAM-InDRE_FB17417_S3927/2021 | EPI_ISL_2858941 | 2021-06-06 |
| C3 | hCoV-19/Mexico/TAM-InDRE_FB18874_S4154/2021 | EPI_ISL_2920725 | 2021-06-16 |
| C3 | hCoV-19/Mexico/TAM-InDRE_FB18904_S4470/2021 | EPI_ISL_3033324 | 2021-06-18 |
| C3 | hCoV-19/Mexico/TAM-LANGEBIO_IMSS_1375/2021  | EPI_ISL_2942504 | 2021-06-21 |
| C3 | hCoV-19/Mexico/SIN-LANGEBIO_IMSS_1293/2021  | EPI_ISL_2942445 | 2021-06-22 |
| C4 | hCoV-19/Singapore/241/2021                  | EPI_ISL_1173250 | 2021-03-03 |
| C4 | hCoV-19/Mexico/CMX-InDRE_FD63747_S2064/2021 | EPI_ISL_2283704 | 2021-03-11 |
| C4 | hCoV-19/Mexico/YUC-InDRE_FB15125_S2056/2021 | EPI_ISL_2283698 | 2021-03-19 |
| C4 | hCoV-19/Mexico/CMX-InDRE_F34543_S900/2021   | EPI_ISL_1423510 | 2021-03-21 |
| C4 | hCoV-19/Mexico/YUC-InDRE_F12194_S1195/2021  | EPI_ISL_1626802 | 2021-03-22 |
| C4 | hCoV-19/Mexico/ROO_INER_IMSS_00771/2021     | EPI_ISL_2091225 | 2021-03-27 |
| C4 | hCoV-19/Mexico/ROO_INER_IMSS_00790/2021     | EPI_ISL_2091243 | 2021-04-03 |
| C4 | hCoV-19/Mexico/NLE-InDRE_FB14848_S2085/2021 | EPI_ISL_2283724 | 2021-04-05 |
| C4 | hCoV-19/Mexico/HID-InDRE_FB13039_S1505/2021 | EPI_ISL_1805483 | 2021-04-06 |
| C4 | hCoV-19/Mexico/MIC-InDRE_FB14989_S2053/2021 | EPI_ISL_2283695 | 2021-04-07 |
| C4 | hCoV-19/Mexico/NLE_INER_IMSS_00735/2021     | EPI_ISL_2091191 | 2021-04-08 |
| C4 | hCoV-19/Mexico/CHH-InDRE_FB13662_S1732/2021 | EPI_ISL_2101871 | 2021-04-13 |
| C4 | hCoV-19/Mexico/MIC-InDRE_FB14998_S2054/2021 | EPI_ISL_2283696 | 2021-04-13 |
| C4 | hCoV-19/Mexico/VER_INER_IMSS_00966/2021     | EPI_ISL_2091407 | 2021-04-14 |
| C4 | hCoV-19/Mexico/CMX-INMEGEN-04-05-71/2021    | EPI_ISL_1711302 | 2021-04-15 |
| C4 | hCoV-19/Mexico/CMX-INMEGEN-04-05-72/2021    | EPI_ISL_1711299 | 2021-04-15 |
| C4 | hCoV-19/Mexico/CMX-INER-INMEGEN-00159/2021  | EPI_ISL_2160651 | 2021-04-16 |
| C4 | hCoV-19/Mexico/CMX-INER-INMEGEN-00164/2021  | EPI_ISL_2160659 | 2021-04-16 |
| C4 | hCoV-19/Mexico/GUA_INER_IMSS_00867/2021     | EPI_ISL_2091318 | 2021-04-16 |
| C4 | hCoV-19/Mexico/COA_LANGEBIO_IMSS_0595/2021  | EPI_ISL_2402014 | 2021-04-17 |
| C4 | hCoV-19/Mexico/NLE_INER_IMSS_00768/2021     | EPI_ISL_2091222 | 2021-04-17 |
| C4 | hCoV-19/Mexico/ROO-InDRE_FB13727_S1740/2021 | EPI_ISL_2101879 | 2021-04-17 |
| C4 | hCoV-19/Mexico/VER-InDRE_FB14026_S1753/2021 | EPI_ISL_2101892 | 2021-04-18 |
| C4 | hCoV-19/Mexico/CMX-INMEGEN-04-06-73/2021    | EPI_ISL_1807363 | 2021-04-19 |
| C4 | hCoV-19/Mexico/HID-InDRE_FB13996_S2048/2021 | EPI_ISL_2283690 | 2021-04-19 |
| C4 | hCoV-19/Mexico/GUA-InDRE_FB13881_S1754/2021 | EPI_ISL_2101893 | 2021-04-20 |

|    |                                             |                 |            |
|----|---------------------------------------------|-----------------|------------|
| C4 | hCoV-19/Mexico/GUA-InDRE_FB13904_S2077/2021 | EPI_ISL_2283717 | 2021-04-20 |
| C4 | hCoV-19/Mexico/ROO-InDRE_FB14101_S1760/2021 | EPI_ISL_2101899 | 2021-04-20 |
| C4 | hCoV-19/Mexico/CHH-InDRE_FB13819_S1743/2021 | EPI_ISL_2101882 | 2021-04-21 |
| C4 | hCoV-19/Mexico/GUA-InDRE_FB13907_S1755/2021 | EPI_ISL_2101894 | 2021-04-21 |
| C4 | hCoV-19/Mexico/JAL-InDRE_FB13972_S1752/2021 | EPI_ISL_2101891 | 2021-04-21 |
| C4 | hCoV-19/Mexico/JAL-InDRE_FB13967_S1756/2021 | EPI_ISL_2101895 | 2021-04-21 |
| C4 | hCoV-19/Mexico/ROO-InDRE_FB14100_S1759/2021 | EPI_ISL_2101898 | 2021-04-21 |
| C4 | hCoV-19/Mexico/QUE-InDRE_FB15562_S2372/2021 | EPI_ISL_2455897 | 2021-04-22 |
| C4 | hCoV-19/Mexico/SIN_CIAD_S6625/2021          | EPI_ISL_2026420 | 2021-04-22 |
| C4 | hCoV-19/Mexico/JAL-InDRE_FB14113_S1761/2021 | EPI_ISL_2101900 | 2021-04-26 |
| C4 | hCoV-19/Mexico/SIN_CIAD_S6643/2021          | EPI_ISL_2026418 | 2021-04-26 |
| C4 | hCoV-19/Mexico/NLE_LANGEBIO_IMSS_0555/2021  | EPI_ISL_2401978 | 2021-04-27 |
| C4 | hCoV-19/Mexico/QUE-InDRE_FB15659_S2376/2021 | EPI_ISL_2455901 | 2021-04-27 |
| C4 | hCoV-19/Mexico/QUE-InDRE_FB15667_S2377/2021 | EPI_ISL_2455902 | 2021-04-27 |
| C4 | hCoV-19/Mexico/COA_LANGEBIO_IMSS_0575/2021  | EPI_ISL_2401995 | 2021-04-28 |
| C4 | hCoV-19/Mexico/MEX-INMEGEN-05-01-266/2021   | EPI_ISL_2105778 | 2021-04-28 |
| C4 | hCoV-19/Mexico/SIN_CIAD_S6662/2021          | EPI_ISL_2249230 | 2021-04-28 |
| C4 | hCoV-19/Mexico/YUC-NYGC-1206-SM/2021        | EPI_ISL_3023815 | 2021-04-28 |
| C4 | hCoV-19/Mexico/CAM_INER_IMSS_1117/2021      | EPI_ISL_2490327 | 2021-04-29 |
| C4 | hCoV-19/Mexico/CMX-INMEGEN-05-02-101/2021   | EPI_ISL_2230870 | 2021-04-29 |
| C4 | hCoV-19/Mexico/HID-INMEGEN-05-02-116/2021   | EPI_ISL_2230873 | 2021-04-29 |
| C4 | hCoV-19/Mexico/HID-INMEGEN-05-02-154/2021   | EPI_ISL_2230876 | 2021-04-30 |
| C4 | hCoV-19/Mexico/SIN-InDRE_FB15074_S2060/2021 | EPI_ISL_2283702 | 2021-04-30 |
| C4 | hCoV-19/Mexico/MEX-INMEGEN-05-01-314/2021   | EPI_ISL_2105822 | 2021-05-01 |
| C4 | hCoV-19/Mexico/HID-INMEGEN-05-02-171/2021   | EPI_ISL_2230878 | 2021-05-02 |
| C4 | hCoV-19/Mexico/MEX-INMEGEN-05-02-166/2021   | EPI_ISL_2230877 | 2021-05-02 |
| C4 | hCoV-19/Mexico/SIN-InDRE_FB15071_S2059/2021 | EPI_ISL_2283701 | 2021-05-03 |
| C4 | hCoV-19/Mexico/SIN_CIAD_S6698/2021          | EPI_ISL_2249236 | 2021-05-03 |
| C4 | hCoV-19/Mexico/SIN_CIAD_S6699/2021          | EPI_ISL_2277642 | 2021-05-03 |
| C4 | hCoV-19/Mexico/YUC-NYGC-1225-SM/2021        | EPI_ISL_3023816 | 2021-05-03 |
| C4 | hCoV-19/Mexico/CAM-InDRE_FB14886_S2047/2021 | EPI_ISL_2283689 | 2021-05-05 |
| C4 | hCoV-19/Mexico/CMX-INMEGEN-05-02-35/2021    | EPI_ISL_2230869 | 2021-05-05 |
| C4 | hCoV-19/Mexico/MEX-INMEGEN-05-02-24/2021    | EPI_ISL_2230867 | 2021-05-05 |
| C4 | hCoV-19/Mexico/QUE-InDRE_FB15774_S2382/2021 | EPI_ISL_2455907 | 2021-05-05 |
| C4 | hCoV-19/Mexico/YUC-NYGC-1211-SM/2021        | EPI_ISL_3023983 | 2021-05-05 |
| C4 | hCoV-19/Mexico/YUC-NYGC-1232-SM/2021        | EPI_ISL_3023948 | 2021-05-05 |
| C4 | hCoV-19/Mexico/CAM_INER_IMSS_1141/2021      | EPI_ISL_2490328 | 2021-05-06 |
| C4 | hCoV-19/Mexico/CMX-INMEGEN-05-01-221/2021   | EPI_ISL_2105741 | 2021-05-06 |
| C4 | hCoV-19/Mexico/QUE-InDRE_FB15789_S2384/2021 | EPI_ISL_2455909 | 2021-05-06 |
| C4 | hCoV-19/Mexico/QUE-InDRE_FB15790_S2385/2021 | EPI_ISL_2455910 | 2021-05-06 |
| C4 | hCoV-19/Mexico/ROO_INER_IMSS_1152/2021      | EPI_ISL_2490330 | 2021-05-06 |
| C4 | hCoV-19/Mexico/NLE_INER_IMSS_1056/2021      | EPI_ISL_2490315 | 2021-05-07 |
| C4 | hCoV-19/Mexico/NLE_INER_IMSS_1058/2021      | EPI_ISL_2490316 | 2021-05-07 |
| C4 | hCoV-19/Mexico/SIN_CIAD_S6741/2021          | EPI_ISL_2249251 | 2021-05-07 |
| C4 | hCoV-19/Mexico/CMX-INMEGEN-05-04-18/2021    | EPI_ISL_2349896 | 2021-05-11 |

|    |                                                 |                 |            |
|----|-------------------------------------------------|-----------------|------------|
| C4 | hCoV-19/Mexico/HID-INMEGEN-05-04-25/2021        | EPI_ISL_2349903 | 2021-05-11 |
| C4 | hCoV-19/Mexico/CMX-INMEGEN-INDRE-05-03-249/2021 | EPI_ISL_2319359 | 2021-05-12 |
| C4 | hCoV-19/Mexico/CMX-INMEGEN-05-04-40/2021        | EPI_ISL_2349916 | 2021-05-12 |
| C4 | hCoV-19/Mexico/HID-INMEGEN-05-04-37/2021        | EPI_ISL_2349913 | 2021-05-12 |
| C4 | hCoV-19/Mexico/MEX-INMEGEN-05-04-36/2021        | EPI_ISL_2349912 | 2021-05-12 |
| C4 | hCoV-19/Mexico/MEX-INMEGEN-05-04-85/2021        | EPI_ISL_2349947 | 2021-05-12 |
| C4 | hCoV-19/Mexico/ZAC_INER_IMSS_1230/2021          | EPI_ISL_2490333 | 2021-05-12 |
| C4 | hCoV-19/Mexico/QUE-InDRE_FB15807_S2386/2021     | EPI_ISL_2455911 | 2021-05-13 |
| C4 | hCoV-19/Mexico/MEX-InDRE_FD68596_S2471/2021     | EPI_ISL_2455992 | 2021-05-14 |
| C4 | hCoV-19/Mexico/GUA-LANGEBIO_IMSS_1001/2021      | EPI_ISL_2671564 | 2021-05-17 |
| C4 | hCoV-19/Mexico/GUA-LANGEBIO_IMSS_1003/2021      | EPI_ISL_2671565 | 2021-05-17 |
| C4 | hCoV-19/Mexico/QUE-InDRE_FB16164_S2460/2021     | EPI_ISL_2455981 | 2021-05-17 |
| C4 | hCoV-19/Mexico/TAM-InDRE_FB16029_S2428/2021     | EPI_ISL_2455952 | 2021-05-17 |
| C4 | hCoV-19/Mexico/TAM-InDRE_FB16034_S2433/2021     | EPI_ISL_2455957 | 2021-05-17 |
| C4 | hCoV-19/Mexico/YUC-InDRE_FB16578_S2746/2021     | EPI_ISL_2533772 | 2021-05-17 |
| C4 | hCoV-19/Mexico/CMX-INER-INMEGEN-00227/2021      | EPI_ISL_2646128 | 2021-05-18 |
| C4 | hCoV-19/Mexico/GUA-InDRE_FB16216_S2466/2021     | EPI_ISL_2455987 | 2021-05-18 |
| C4 | hCoV-19/Mexico/ROO-LANGEBIO_IMSS_0900/2021      | EPI_ISL_2671655 | 2021-05-18 |
| C4 | hCoV-19/Mexico/VER-LANGEBIO_IMSS_1103/2021      | EPI_ISL_2671737 | 2021-05-18 |
| C4 | hCoV-19/Mexico/VER-LANGEBIO_IMSS_1105/2021      | EPI_ISL_2671739 | 2021-05-18 |
| C4 | hCoV-19/Mexico/YUC-InDRE_FB16582_S2747/2021     | EPI_ISL_2533773 | 2021-05-18 |
| C4 | hCoV-19/Mexico/GUA-InDRE_FB16219_S2467/2021     | EPI_ISL_2455988 | 2021-05-19 |
| C4 | hCoV-19/Mexico/MEX-InDRE_FD71099_S2783/2021     | EPI_ISL_2533809 | 2021-05-19 |
| C4 | hCoV-19/Mexico/QUE-InDRE_FB16154_S2438/2021     | EPI_ISL_2455962 | 2021-05-19 |
| C4 | hCoV-19/Mexico/ROO-LANGEBIO_IMSS_0926/2021      | EPI_ISL_2671671 | 2021-05-19 |
| C4 | hCoV-19/Mexico/ROO-LANGEBIO_IMSS_0928/2021      | EPI_ISL_2671673 | 2021-05-19 |
| C4 | hCoV-19/Mexico/YUC-InDRE_FB16588_S2749/2021     | EPI_ISL_2533775 | 2021-05-19 |
| C4 | hCoV-19/Mexico/CAM-LANGEBIO_IMSS_0940/2021      | EPI_ISL_2671501 | 2021-05-20 |
| C4 | hCoV-19/Mexico/QUE-InDRE_FB16436_S2739/2021     | EPI_ISL_2533765 | 2021-05-20 |
| C4 | hCoV-19/Mexico/YUC-InDRE_FB16607_S2753/2021     | EPI_ISL_2533779 | 2021-05-20 |
| C4 | hCoV-19/Mexico/YUC-InDRE_FB16611_S2754/2021     | EPI_ISL_2533780 | 2021-05-20 |
| C4 | hCoV-19/Mexico/YUC-InDRE_FB16617_S2756/2021     | EPI_ISL_2533782 | 2021-05-20 |
| C4 | hCoV-19/Mexico/HID-INMEGEN-05-05-141/2021       | EPI_ISL_2444484 | 2021-05-21 |
| C4 | hCoV-19/Mexico/HID-InDRE_FB17207_S3093/2021     | EPI_ISL_2663360 | 2021-05-21 |
| C4 | hCoV-19/Mexico/ROO-LANGEBIO_IMSS_0937/2021      | EPI_ISL_2671680 | 2021-05-21 |
| C4 | hCoV-19/Mexico/YUC-InDRE_FB16638_S2757/2021     | EPI_ISL_2533783 | 2021-05-21 |
| C4 | hCoV-19/Mexico/GUA-InDRE_FB16459_S3475/2021     | EPI_ISL_2778990 | 2021-05-24 |
| C4 | hCoV-19/Mexico/YUC-InDRE_FB16653_S2758/2021     | EPI_ISL_2533784 | 2021-05-24 |
| C4 | hCoV-19/Mexico/YUC-InDRE_FB16657_S2759/2021     | EPI_ISL_2533785 | 2021-05-24 |
| C4 | hCoV-19/Mexico/GUA-InDRE_FB16463_S3476/2021     | EPI_ISL_2778991 | 2021-05-25 |
| C4 | hCoV-19/Mexico/GUA-InDRE_FB16460_S3779/2021     | EPI_ISL_2779281 | 2021-05-25 |
| C4 | hCoV-19/Mexico/JAL-LANGEBIO_IMSS_1024/2021      | EPI_ISL_2671577 | 2021-05-25 |
| C4 | hCoV-19/Mexico/YUC-InDRE_FB16672_S2765/2021     | EPI_ISL_2533791 | 2021-05-25 |
| C4 | hCoV-19/Mexico/YUC-InDRE_FB16674_S2766/2021     | EPI_ISL_2533792 | 2021-05-25 |
| C4 | hCoV-19/Mexico/ZAC_IBT_IMSS_1462/2021           | EPI_ISL_2681120 | 2021-05-25 |

|    |                                             |                 |            |
|----|---------------------------------------------|-----------------|------------|
| C4 | hCoV-19/Mexico/CMX-INMEGEN-05-06-40/2021    | EPI_ISL_2603625 | 2021-05-26 |
| C4 | hCoV-19/Mexico/HID-InDRE_FB17212_S3094/2021 | EPI_ISL_2663361 | 2021-05-26 |
| C4 | hCoV-19/Mexico/HID-InDRE_FB17213_S3095/2021 | EPI_ISL_2663362 | 2021-05-26 |
| C4 | hCoV-19/Mexico/HID-InDRE_FB17214_S3096/2021 | EPI_ISL_2663363 | 2021-05-26 |
| C4 | hCoV-19/Mexico/QUE-InDRE_FB16437_S2740/2021 | EPI_ISL_2533766 | 2021-05-26 |
| C4 | hCoV-19/Mexico/ROO-InDRE_FB16795_S2779/2021 | EPI_ISL_2533805 | 2021-05-26 |
| C4 | hCoV-19/Mexico/YUC-NYGC-1163-SM/2021        | EPI_ISL_3023819 | 2021-05-26 |
| C4 | hCoV-19/Mexico/YUC-InDRE_FB16678_S2767/2021 | EPI_ISL_2533793 | 2021-05-26 |
| C4 | hCoV-19/Mexico/YUC-InDRE_FB16683_S2769/2021 | EPI_ISL_2533795 | 2021-05-26 |
| C4 | hCoV-19/Mexico/YUC-InDRE_FB16684_S2770/2021 | EPI_ISL_2533796 | 2021-05-26 |
| C4 | hCoV-19/Mexico/ZAC_IBT_IMSS_1470/2021       | EPI_ISL_2681121 | 2021-05-26 |
| C4 | hCoV-19/Mexico/CMX-INMEGEN-05-06-55/2021    | EPI_ISL_2603634 | 2021-05-27 |
| C4 | hCoV-19/Mexico/CMX-INMEGEN-05-06-76/2021    | EPI_ISL_2603650 | 2021-05-27 |
| C4 | hCoV-19/Mexico/CMX-INMEGEN-05-06-77/2021    | EPI_ISL_2603651 | 2021-05-27 |
| C4 | hCoV-19/Mexico/CMX-INMEGEN-05-06-202/2021   | EPI_ISL_2603691 | 2021-05-28 |
| C4 | hCoV-19/Mexico/CMX-INMEGEN-05-06-273/2021   | EPI_ISL_2603742 | 2021-05-28 |
| C4 | hCoV-19/Mexico/CMX-INMEGEN-05-06-78/2021    | EPI_ISL_2603652 | 2021-05-28 |
| C4 | hCoV-19/Mexico/MEX-INMEGEN-05-06-340/2021   | EPI_ISL_2603791 | 2021-05-28 |
| C4 | hCoV-19/Mexico/SIN_CIAD-MZT_S6921/2021      | EPI_ISL_2533919 | 2021-05-28 |
| C4 | hCoV-19/Mexico/VER_IBT_IMSS_1663/2021       | EPI_ISL_2681147 | 2021-05-28 |
| C4 | hCoV-19/Mexico/YUC-InDRE_FB16549_S3111/2021 | EPI_ISL_2663378 | 2021-05-28 |
| C4 | hCoV-19/Mexico/ZAC_IBT_IMSS_1472/2021       | EPI_ISL_2681092 | 2021-05-28 |
| C4 | hCoV-19/Mexico/CHH-InDRE_FB16978_S3129/2021 | EPI_ISL_2663396 | 2021-05-29 |
| C4 | hCoV-19/Mexico/CMX-INMEGEN-05-06-286/2021   | EPI_ISL_2603754 | 2021-05-29 |
| C4 | hCoV-19/Mexico/COA_IBT_IMSS_1400/2021       | EPI_ISL_2681095 | 2021-05-29 |
| C4 | hCoV-19/Mexico/HID-InDRE_FB17225_S3100/2021 | EPI_ISL_2663367 | 2021-05-29 |
| C4 | hCoV-19/Mexico/NLE-InDRE_FB16950_S3122/2021 | EPI_ISL_2663389 | 2021-05-29 |
| C4 | hCoV-19/Mexico/JAL-InDRE_FB16511_S2741/2021 | EPI_ISL_2533767 | 2021-05-30 |
| C4 | hCoV-19/Mexico/QUE-InDRE_FB16868_S3113/2021 | EPI_ISL_2663380 | 2021-05-30 |
| C4 | hCoV-19/Mexico/GUA-InDRE_FB16899_S3118/2021 | EPI_ISL_2663385 | 2021-05-31 |
| C4 | hCoV-19/Mexico/HID-InDRE_FB17226_S3101/2021 | EPI_ISL_2663368 | 2021-05-31 |
| C4 | hCoV-19/Mexico/ROO_IBT_IMSS_1716/2021       | EPI_ISL_2681136 | 2021-05-31 |
| C4 | hCoV-19/Mexico/ROO_IBT_IMSS_1732/2021       | EPI_ISL_2681050 | 2021-05-31 |
| C4 | hCoV-19/Mexico/CAM_IBT_IMSS_1746/2021       | EPI_ISL_2681118 | 2021-06-01 |
| C4 | hCoV-19/Mexico/ROO-InDRE_FB17192_S3090/2021 | EPI_ISL_2663357 | 2021-06-01 |
| C4 | hCoV-19/Mexico/YUC-InDRE_FB17480_S3493/2021 | EPI_ISL_2779008 | 2021-06-01 |
| C4 | hCoV-19/Mexico/YUC-InDRE_FB17482_S3494/2021 | EPI_ISL_2779009 | 2021-06-01 |
| C4 | hCoV-19/Mexico/YUC-InDRE_FB17498_S3497/2021 | EPI_ISL_2779012 | 2021-06-01 |
| C4 | hCoV-19/Mexico/YUC-InDRE_FB17506_S3500/2021 | EPI_ISL_2779015 | 2021-06-01 |
| C4 | hCoV-19/Mexico/CAM-IBT_IMSS_1865/2021       | EPI_ISL_2801583 | 2021-06-03 |
| C4 | hCoV-19/Mexico/MOR-InDRE_FB16889_S3115/2021 | EPI_ISL_2663382 | 2021-06-03 |
| C4 | hCoV-19/Mexico/OAX-IBT_IMSS_1980/2021       | EPI_ISL_2801837 | 2021-06-03 |
| C4 | hCoV-19/Mexico/ROO-INMEGEN-06-01-322/2021   | EPI_ISL_2616965 | 2021-06-03 |
| C4 | hCoV-19/Mexico/YUC-INMEGEN-06-01-338/2021   | EPI_ISL_2616966 | 2021-06-03 |
| C4 | hCoV-19/Mexico/YUC-InDRE_FB17518_S3502/2021 | EPI_ISL_2779017 | 2021-06-03 |

|    |                                             |                 |            |
|----|---------------------------------------------|-----------------|------------|
| C4 | hCoV-19/Mexico/CAM-IBT_IMSS_1876/2021       | EPI_ISL_2801584 | 2021-06-04 |
| C4 | hCoV-19/Mexico/OAX-IBT_IMSS_1981/2021       | EPI_ISL_2801838 | 2021-06-04 |
| C4 | hCoV-19/Mexico/QUE-InDRE_FB16876_S3114/2021 | EPI_ISL_2663381 | 2021-06-04 |
| C4 | hCoV-19/Mexico/SIN_CIAD-MZT_HJ1755/2021     | EPI_ISL_2680936 | 2021-06-04 |
| C4 | hCoV-19/Mexico/VER-IBT_IMSS_1983/2021       | EPI_ISL_2801841 | 2021-06-04 |
| C4 | hCoV-19/Mexico/VER-IBT_IMSS_1990/2021       | EPI_ISL_2801847 | 2021-06-04 |
| C4 | hCoV-19/Mexico/HID-InDRE_FB17234_S3102/2021 | EPI_ISL_2663369 | 2021-06-05 |
| C4 | hCoV-19/Mexico/HID-InDRE_FB17235_S3103/2021 | EPI_ISL_2663370 | 2021-06-05 |
| C4 | hCoV-19/Mexico/ROO-IBT_IMSS_2106/2021       | EPI_ISL_2801653 | 2021-06-05 |
| C4 | hCoV-19/Mexico/SIN_CIAD-MZT_S7016/2021      | EPI_ISL_2680938 | 2021-06-05 |
| C4 | hCoV-19/Mexico/VER-IBT_IMSS_1998/2021       | EPI_ISL_2801851 | 2021-06-06 |
| C4 | hCoV-19/Mexico/YUC-INMEGEN-06-02-35/2021    | EPI_ISL_2692570 | 2021-06-06 |
| C4 | hCoV-19/Mexico/CAM-IBT_IMSS_2098/2021       | EPI_ISL_2801645 | 2021-06-07 |
| C4 | hCoV-19/Mexico/GUA-InDRE_FB17325_S3532/2021 | EPI_ISL_2779047 | 2021-06-07 |
| C4 | hCoV-19/Mexico/ROO-INMEGEN-06-02-104/2021   | EPI_ISL_2692631 | 2021-06-07 |
| C4 | hCoV-19/Mexico/CMX-LANGEBIO_IMSS_1461/2021  | EPI_ISL_2942580 | 2021-06-08 |
| C4 | hCoV-19/Mexico/HID-InDRE_FB17239_S3104/2021 | EPI_ISL_2663371 | 2021-06-08 |
| C4 | hCoV-19/Mexico/HID-InDRE_FB17241_S3105/2021 | EPI_ISL_2663372 | 2021-06-08 |
| C4 | hCoV-19/Mexico/HID-InDRE_FB17242_S3106/2021 | EPI_ISL_2663373 | 2021-06-08 |
| C4 | hCoV-19/Mexico/VER-InDRE_FB17434_S3931/2021 | EPI_ISL_2858945 | 2021-06-08 |
| C4 | hCoV-19/Mexico/ZAC-IBT_IMSS_1826/2021       | EPI_ISL_2801701 | 2021-06-08 |
| C4 | hCoV-19/Mexico/HID-InDRE_FB17245_S3107/2021 | EPI_ISL_2663374 | 2021-06-09 |
| C4 | hCoV-19/Mexico/HID-InDRE_FB17246_S3108/2021 | EPI_ISL_2663375 | 2021-06-09 |
| C4 | hCoV-19/Mexico/SIN_CIAD-MZT_HJ1782/2021     | EPI_ISL_2894558 | 2021-06-09 |
| C4 | hCoV-19/Mexico/VER-INMEGEN-06-02-376/2021   | EPI_ISL_2692852 | 2021-06-09 |
| C4 | hCoV-19/Mexico/YUC-InDRE_FB17580_S3508/2021 | EPI_ISL_2779023 | 2021-06-09 |
| C4 | hCoV-19/Mexico/YUC-INMEGEN-06-04-84/2021    | EPI_ISL_2894227 | 2021-06-09 |
| C4 | hCoV-19/Mexico/QUE-InDRE_FB17259_S3110/2021 | EPI_ISL_2663377 | 2021-06-10 |
| C4 | hCoV-19/Mexico/ROO-INMEGEN-06-04-313/2021   | EPI_ISL_2894360 | 2021-06-11 |
| C4 | hCoV-19/Mexico/SIN_CIAD-CLN_D0557/2021      | EPI_ISL_2927968 | 2021-06-12 |
| C4 | hCoV-19/Mexico/CMX-InDRE_FB19386_S4507/2021 | EPI_ISL_3033361 | 2021-06-14 |
| C4 | hCoV-19/Mexico/YUC-InDRE_FB17453_S3932/2021 | EPI_ISL_2858946 | 2021-06-14 |
| C4 | hCoV-19/Mexico/ZAC-InDRE_FB17736_S4113/2021 | EPI_ISL_2920684 | 2021-06-14 |
| C4 | hCoV-19/Mexico/YUC-Biomedicos-6150004/2021  | EPI_ISL_2928339 | 2021-06-15 |
| C4 | hCoV-19/Mexico/GRO-LANGEBIO_IMSS_1391/2021  | EPI_ISL_2942518 | 2021-06-16 |
| C4 | hCoV-19/Mexico/SIN-InDRE_FB18120_S3959/2021 | EPI_ISL_2858973 | 2021-06-16 |
| C4 | hCoV-19/Mexico/CMX-InDRE_FB19393_S4508/2021 | EPI_ISL_3046076 | 2021-06-17 |
| C4 | hCoV-19/Mexico/CMX-InDRE_FB19400_S4509/2021 | EPI_ISL_3033362 | 2021-06-18 |
| C4 | hCoV-19/Mexico/BCN-LANGEBIO_IMSS_1439/2021  | EPI_ISL_2942561 | 2021-06-21 |
| C4 | hCoV-19/Mexico/CAM-LANGEBIO_IMSS_1231/2021  | EPI_ISL_2942392 | 2021-06-21 |
| C4 | hCoV-19/Mexico/PUE-InDRE_FB19622_S4513/2021 | EPI_ISL_3033366 | 2021-06-21 |
| C4 | hCoV-19/Mexico/ROO-InDRE_FB19165_S4499/2021 | EPI_ISL_3033353 | 2021-06-21 |
| C4 | hCoV-19/Mexico/HID-InDRE_FB19127_S4494/2021 | EPI_ISL_3033348 | 2021-06-22 |
| C4 | hCoV-19/Mexico/HID-InDRE_FB19128_S4495/2021 | EPI_ISL_3033349 | 2021-06-22 |
| C4 | hCoV-19/Mexico/TAB-InDRE_FB18500_S4148/2021 | EPI_ISL_2920719 | 2021-06-22 |

|    |                                                |                 |            |
|----|------------------------------------------------|-----------------|------------|
| C4 | hCoV-19/Mexico/YUC-INMEGEN-17-140/2021         | EPI_ISL_3067914 | 2021-06-22 |
| C4 | hCoV-19/Mexico/ROO-INMEGEN-16-350/2021         | EPI_ISL_2978654 | 2021-06-23 |
| C4 | hCoV-19/Mexico/YUC-INMEGEN-16-352/2021         | EPI_ISL_2978656 | 2021-06-23 |
| C4 | hCoV-19/Mexico/CMX-INMEGEN-06-03-32/2021       | EPI_ISL_2810050 | 2021-06-24 |
| C4 | hCoV-19/Mexico/CMX-INMEGEN-06-03-65/2021       | EPI_ISL_2810074 | 2021-06-24 |
| C4 | hCoV-19/Mexico/HID-LANGEBIO_IMSS_1451/2021     | EPI_ISL_2942571 | 2021-06-25 |
| C4 | hCoV-19/Mexico/HID-InDRE_FB19136_S4496/2021    | EPI_ISL_3033350 | 2021-06-25 |
| C4 | hCoV-19/Mexico/HID-InDRE_FB19137_S4497/2021    | EPI_ISL_3033351 | 2021-06-25 |
| C4 | hCoV-19/Mexico/CAM-LANGEBIO_IMSS_1548/2021     | EPI_ISL_2942659 | 2021-06-26 |
| C4 | hCoV-19/Mexico/ROO-LANGEBIO_IMSS_1590/2021     | EPI_ISL_2942701 | 2021-06-28 |
| C4 | hCoV-19/Mexico/TAB-InDRE_FB19055_S4487/2021    | EPI_ISL_3033341 | 2021-06-28 |
| C5 | hCoV-19/Mexico/CHH_INER_IMSS_00383/2021        | EPI_ISL_1585393 | 2021-03-05 |
| C5 | hCoV-19/Mexico/CHH-InDRE_F12156_S1188/2021     | EPI_ISL_1626795 | 2021-03-15 |
| C5 | hCoV-19/Mexico/CHH-InDRE_F12161_S1191/2021     | EPI_ISL_1626798 | 2021-03-17 |
| C5 | hCoV-19/Mexico/CHH-InDRE_F12165_S1192/2021     | EPI_ISL_1626799 | 2021-03-17 |
| C5 | hCoV-19/Mexico/CHH-InDRE_F12359_S1197/2021     | EPI_ISL_1626804 | 2021-03-22 |
| C5 | hCoV-19/Mexico/CHH-InDRE_FB12868_S1488/2021    | EPI_ISL_1805466 | 2021-03-30 |
| C5 | hCoV-19/Mexico/CHH-InDRE_FB12878_S1491/2021    | EPI_ISL_1805469 | 2021-04-02 |
| C5 | hCoV-19/Mexico/CHH-InDRE_FB12877_S1490/2021    | EPI_ISL_1805468 | 2021-04-04 |
| C5 | hCoV-19/Mexico/CMX-INMEGEN-InDRE-04-04-99/2021 | EPI_ISL_1628598 | 2021-04-05 |
| C5 | hCoV-19/Mexico/SIN_CIAD_HJ1385/2021            | EPI_ISL_2026411 | 2021-04-05 |
| C5 | hCoV-19/Mexico/CHH-InDRE_FB13253_S1501/2021    | EPI_ISL_1805479 | 2021-04-09 |
| C5 | hCoV-19/Mexico/CHH-InDRE_FB13663_S1733/2021    | EPI_ISL_2101872 | 2021-04-13 |
| C5 | hCoV-19/Mexico/CHH-InDRE_FB13671_S1735/2021    | EPI_ISL_2101874 | 2021-04-14 |
| C5 | hCoV-19/Mexico/CHH-InDRE_FB13672_S1736/2021    | EPI_ISL_2101875 | 2021-04-14 |
| C5 | hCoV-19/Mexico/CHH-InDRE_FB13702_S1739/2021    | EPI_ISL_2101878 | 2021-04-15 |
| C5 | hCoV-19/Mexico/CHH-InDRE_FB13678_S1751/2021    | EPI_ISL_2101890 | 2021-04-16 |
| C5 | hCoV-19/Mexico/CHH_LANGEBIO_IMSS_0515/2021     | EPI_ISL_2401942 | 2021-04-19 |
| C5 | hCoV-19/Mexico/SIN_CIAD_HJ1490/2021            | EPI_ISL_2026413 | 2021-04-19 |
| C5 | hCoV-19/Mexico/SIN_CIAD_HJ1500/2021            | EPI_ISL_2026415 | 2021-04-19 |
| C5 | hCoV-19/Mexico/CHH-InDRE_FB13822_S1745/2021    | EPI_ISL_2101884 | 2021-04-20 |
| C5 | hCoV-19/Mexico/SIN_CIAD_HJ1512/2021            | EPI_ISL_2026417 | 2021-04-20 |
| C5 | hCoV-19/Mexico/SIN-InDRE_FB14032_S2070/2021    | EPI_ISL_2283710 | 2021-04-22 |
| C5 | hCoV-19/Mexico/SIN-InDRE_FB14031_S2069/2021    | EPI_ISL_2283709 | 2021-04-24 |
| C5 | hCoV-19/Mexico/QUE-InDRE_FB15604_S2373/2021    | EPI_ISL_2455898 | 2021-04-25 |
| C5 | hCoV-19/Mexico/SON-InDRE_FB14085_S1758/2021    | EPI_ISL_2101897 | 2021-04-25 |
| C5 | hCoV-19/Mexico/CHH-InDRE_FB14223_S1765/2021    | EPI_ISL_2101904 | 2021-04-26 |
| C5 | hCoV-19/Mexico/NLE_LANGEBIO_IMSS_0565/2021     | EPI_ISL_2401987 | 2021-04-27 |
| C5 | hCoV-19/Mexico/CHH_INER_IMSS_1042/2021         | EPI_ISL_2490312 | 2021-05-02 |
| C5 | hCoV-19/Mexico/CHH-InDRE_FB14915_S2049/2021    | EPI_ISL_2283691 | 2021-05-02 |
| C5 | hCoV-19/Mexico/CHH_INER_IMSS_1055/2021         | EPI_ISL_2490314 | 2021-05-03 |
| C5 | hCoV-19/Mexico/SIN_CIAD_ID2302/2021            | EPI_ISL_2249234 | 2021-05-03 |
| C5 | hCoV-19/Mexico/CHH_INER_IMSS_1062/2021         | EPI_ISL_2490319 | 2021-05-04 |
| C5 | hCoV-19/Mexico/SIN_CIAD_S6706/2021             | EPI_ISL_2249240 | 2021-05-04 |
| C5 | hCoV-19/Mexico/CHH-InDRE_FB14901_S2402/2021    | EPI_ISL_2455927 | 2021-05-05 |



|    |                                             |                 |            |
|----|---------------------------------------------|-----------------|------------|
| C5 | hCoV-19/Mexico/CHH-InDRE_FB14909_S2405/2021 | EPI_ISL_2455929 | 2021-05-05 |
| C5 | hCoV-19/Mexico/HID-InDRE_FB14798_S2046/2021 | EPI_ISL_2283688 | 2021-05-05 |
| C5 | hCoV-19/Mexico/CHH_INER_IMSS_1078/2021      | EPI_ISL_2490321 | 2021-05-06 |
| C5 | hCoV-19/Mexico/SIN_CIAD_HJ1599/2021         | EPI_ISL_2249241 | 2021-05-06 |
| C5 | hCoV-19/Mexico/CHH-InDRE_FB14879_S2392/2021 | EPI_ISL_2455917 | 2021-05-07 |
| C5 | hCoV-19/Mexico/SIN_INER_IMSS_1180/2021      | EPI_ISL_2490331 | 2021-05-10 |
| C5 | hCoV-19/Mexico/SIN_CIAD_HJ1616/2021         | EPI_ISL_2249254 | 2021-05-10 |
| C5 | hCoV-19/Mexico/CHH_INER_IMSS_1103/2021      | EPI_ISL_2490326 | 2021-05-11 |
| C5 | hCoV-19/Mexico/CHH-LANGEBIO_IMSS_0835/2021  | EPI_ISL_2671505 | 2021-05-13 |
| C5 | hCoV-19/Mexico/CHH-InDRE_FB15895_S2395/2021 | EPI_ISL_2455920 | 2021-05-13 |
| C5 | hCoV-19/Mexico/CHH-LANGEBIO_IMSS_0836/2021  | EPI_ISL_2671506 | 2021-05-14 |
| C5 | hCoV-19/Mexico/CHH-LANGEBIO_IMSS_0841/2021  | EPI_ISL_2671509 | 2021-05-14 |
| C5 | hCoV-19/Mexico/SIN_CIAD-MZT_ID2430/2021     | EPI_ISL_2533913 | 2021-05-15 |
| C5 | hCoV-19/Mexico/CMX-INMEGEN-05-04-234/2021   | EPI_ISL_2350048 | 2021-05-17 |
| C5 | hCoV-19/Mexico/CMX-INMEGEN-05-04-364/2021   | EPI_ISL_2350131 | 2021-05-17 |
| C5 | hCoV-19/Mexico/CHH-InDRE_FB16251_S2733/2021 | EPI_ISL_2533759 | 2021-05-18 |
| C5 | hCoV-19/Mexico/CHH-InDRE_FB16252_S2734/2021 | EPI_ISL_2533760 | 2021-05-18 |
| C5 | hCoV-19/Mexico/CHH-LANGEBIO_IMSS_0868/2021  | EPI_ISL_2671517 | 2021-05-19 |
| C5 | hCoV-19/Mexico/MEX-LANGEBIO_IMSS_1121/2021  | EPI_ISL_2671605 | 2021-05-19 |
| C5 | hCoV-19/Mexico/QUE-InDRE_FB16157_S2436/2021 | EPI_ISL_2455960 | 2021-05-19 |
| C5 | hCoV-19/Mexico/QUE-InDRE_FB16156_S2437/2021 | EPI_ISL_2455961 | 2021-05-19 |
| C5 | hCoV-19/Mexico/CMX-INMEGEN-05-05-232/2021   | EPI_ISL_2444538 | 2021-05-20 |
| C5 | hCoV-19/Mexico/MEX-INMEGEN-05-05-200/2021   | EPI_ISL_2550752 | 2021-05-20 |
| C5 | hCoV-19/Mexico/MEX-INMEGEN-05-05-3/2021     | EPI_ISL_2444399 | 2021-05-21 |
| C5 | hCoV-19/Mexico/JAL-InDRE_FB16739_S2776/2021 | EPI_ISL_2533802 | 2021-05-22 |
| C5 | hCoV-19/Mexico/CMX-INMEGEN-05-05-15/2021    | EPI_ISL_2444407 | 2021-05-23 |
| C5 | hCoV-19/Mexico/CHH-InDRE_FB16972_S3127/2021 | EPI_ISL_2663394 | 2021-05-25 |
| C5 | hCoV-19/Mexico/CHH_IBT_IMSS_1434/2021       | EPI_ISL_2681103 | 2021-05-26 |
| C5 | hCoV-19/Mexico/CMX-INMEGEN-06-02-304/2021   | EPI_ISL_2692795 | 2021-05-26 |
| C5 | hCoV-19/Mexico/CMX-INMEGEN-06-02-308/2021   | EPI_ISL_2692798 | 2021-05-26 |
| C5 | hCoV-19/Mexico/VER-INMEGEN-05-06-255/2021   | EPI_ISL_2603726 | 2021-05-27 |
| C5 | hCoV-19/Mexico/HID-INMEGEN-05-06-371/2021   | EPI_ISL_2603814 | 2021-05-28 |
| C5 | hCoV-19/Mexico/CMX-INMEGEN-05-06-296/2021   | EPI_ISL_2603760 | 2021-05-29 |
| C5 | hCoV-19/Mexico/CMX-INMEGEN-05-06-342/2021   | EPI_ISL_2603793 | 2021-05-29 |
| C5 | hCoV-19/Mexico/HID-InDRE_FB17223_S3098/2021 | EPI_ISL_2663365 | 2021-05-29 |
| C5 | hCoV-19/Mexico/MEX-INMEGEN-05-06-310/2021   | EPI_ISL_2603772 | 2021-05-29 |
| C5 | hCoV-19/Mexico/MEX-INMEGEN-05-06-336/2021   | EPI_ISL_2603787 | 2021-05-29 |
| C5 | hCoV-19/Mexico/SIN-IBT_IMSS_1832/2021       | EPI_ISL_2801707 | 2021-05-29 |
| C5 | hCoV-19/Mexico/SIN_CIAD-CLN_D1476/2021      | EPI_ISL_2680923 | 2021-05-30 |
| C5 | hCoV-19/Mexico/SIN_CIAD-CLN_D1477/2021      | EPI_ISL_2680924 | 2021-05-30 |
| C5 | hCoV-19/Mexico/SON-InDRE_FB17175_S3088/2021 | EPI_ISL_2663355 | 2021-05-30 |
| C5 | hCoV-19/Mexico/SIN_CIAD-CLN_D1511/2021      | EPI_ISL_2680927 | 2021-05-31 |
| C5 | hCoV-19/Mexico/SIN-InDRE_FB16917_S3067/2021 | EPI_ISL_2663333 | 2021-05-31 |
| C5 | hCoV-19/Mexico/CMX-INER-IBT-0249/2021       | EPI_ISL_2648118 | 2021-06-01 |
| C5 | hCoV-19/Mexico/SIN_CIAD-CLN_D0035/2021      | EPI_ISL_2680920 | 2021-06-01 |

|    |                                             |                 |            |
|----|---------------------------------------------|-----------------|------------|
| C5 | hCoV-19/Mexico/CHH_IBT_IMSS_1430/2021       | EPI_ISL_2681289 | 2021-06-02 |
| C5 | hCoV-19/Mexico/GUA-InDRE_FB16908_S3120/2021 | EPI_ISL_2663387 | 2021-06-03 |
| C5 | hCoV-19/Mexico/SIN-CIAD-CLN_D0174/2021      | EPI_ISL_2987687 | 2021-06-03 |
| C5 | hCoV-19/Mexico/SON_CIAD-HMO_2555/2021       | EPI_ISL_2894566 | 2021-06-04 |
| C5 | hCoV-19/Mexico/SIN-IBT_IMSS_1871/2021       | EPI_ISL_2801739 | 2021-06-07 |
| C5 | hCoV-19/Mexico/CHH-IBT_IMSS_1813/2021       | EPI_ISL_2801692 | 2021-06-08 |
| C5 | hCoV-19/Mexico/SIN-IBT_IMSS_1879/2021       | EPI_ISL_2801745 | 2021-06-08 |
| C5 | hCoV-19/Mexico/SIN-InDRE_FB17473_S3490/2021 | EPI_ISL_2779005 | 2021-06-08 |
| C5 | hCoV-19/Mexico/SIN-InDRE_FB17478_S3492/2021 | EPI_ISL_2779007 | 2021-06-08 |
| C5 | hCoV-19/Mexico/CHP-InDRE_FB17387_S3482/2021 | EPI_ISL_2778997 | 2021-06-09 |
| C5 | hCoV-19/Mexico/DUR-InDRE_FB17381_S3478/2021 | EPI_ISL_2778993 | 2021-06-09 |
| C5 | hCoV-19/Mexico/DUR-InDRE_FB17382_S3479/2021 | EPI_ISL_2778994 | 2021-06-09 |
| C5 | hCoV-19/Mexico/DUR-InDRE_FB17386_S3481/2021 | EPI_ISL_2778996 | 2021-06-09 |
| C5 | hCoV-19/Mexico/DUR-InDRE_FB17390_S3485/2021 | EPI_ISL_2779000 | 2021-06-09 |
| C5 | hCoV-19/Mexico/MEX-InDRE_FB17389_S3484/2021 | EPI_ISL_2778999 | 2021-06-09 |
| C5 | hCoV-19/Mexico/NAY-InDRE_FB17385_S3480/2021 | EPI_ISL_2778995 | 2021-06-09 |
| C5 | hCoV-19/Mexico/SIN-InDRE_FB17388_S3483/2021 | EPI_ISL_2778998 | 2021-06-09 |
| C5 | hCoV-19/Mexico/CHH-InDRE_FB17410_S3926/2021 | EPI_ISL_2858940 | 2021-06-11 |
| C5 | hCoV-19/Mexico/SIN_CIAD-CLN_D0511/2021      | EPI_ISL_2927967 | 2021-06-11 |
| C5 | hCoV-19/Mexico/SIN-CIAD-MZT_S7079/2021      | EPI_ISL_2987713 | 2021-06-11 |
| C5 | hCoV-19/Mexico/SON_CIAD-HMO_2613/2021       | EPI_ISL_2894569 | 2021-06-11 |
| C5 | hCoV-19/Mexico/SIN-CIAD-MZT_S7103/2021      | EPI_ISL_2987717 | 2021-06-14 |
| C5 | hCoV-19/Mexico/SIN-CIAD-MZT_S7104/2021      | EPI_ISL_2987718 | 2021-06-14 |
| C5 | hCoV-19/Mexico/SON-InDRE_FB18023_S3947/2021 | EPI_ISL_2858961 | 2021-06-15 |
| C5 | hCoV-19/Mexico/SON_CIAD-HMO_16010/2021      | EPI_ISL_2927979 | 2021-06-15 |
| C5 | hCoV-19/Mexico/SON_CIAD-HMO_16011/2021      | EPI_ISL_2927980 | 2021-06-15 |
| C5 | hCoV-19/Mexico/SON-InDRE_FB18293_S3968/2021 | EPI_ISL_2858982 | 2021-06-17 |
| C5 | hCoV-19/Mexico/OAX-InDRE_FB18623_S4153/2021 | EPI_ISL_2920724 | 2021-06-19 |
| C5 | hCoV-19/Mexico/SIN_CIAD-CLN_S0600/2021      | EPI_ISL_2927971 | 2021-06-21 |
| C5 | hCoV-19/Mexico/SIN-LANGEBIO_IMSS_1291/2021  | EPI_ISL_2942444 | 2021-06-22 |
| C5 | hCoV-19/Mexico/SIN-LANGEBIO_IMSS_1305/2021  | EPI_ISL_2942455 | 2021-06-22 |
| C5 | hCoV-19/Mexico/CMX-InDRE_FD77651_S4136/2021 | EPI_ISL_2920707 | 2021-06-23 |
| C5 | hCoV-19/Mexico/CMX-InDRE_FD77860_S4137/2021 | EPI_ISL_2920708 | 2021-06-25 |
| C5 | hCoV-19/Mexico/CMX-InDRE_FD77861_S4138/2021 | EPI_ISL_2920709 | 2021-06-25 |
| C5 | hCoV-19/Mexico/CMX-InDRE_FD77862_S4139/2021 | EPI_ISL_2920710 | 2021-06-25 |
| C5 | hCoV-19/Mexico/CMX-InDRE_FD77863_S4140/2021 | EPI_ISL_2920711 | 2021-06-25 |
| C5 | hCoV-19/Mexico/SIN-InDRE_FB19380_S4506/2021 | EPI_ISL_3033360 | 2021-06-26 |
| C5 | hCoV-19/Mexico/ROO-LANGEBIO_IMSS_1578/2021  | EPI_ISL_2942689 | 2021-06-27 |

---

















|                                                                                                                                                                                                                                                                                                                                                                                                                                                                                                                                                                                                                                                                                                                                                                                                                                                                                                                                                                                                                                                                                                                                                                                                                                                                                                                                                                                                                                                                                                                                                                                                                                                                                                                                                                                                                                                                                                                                                                                                                                                                                                                                                                                                                                                                                                                                                                                                                                                                                                                                                                                                                                                                                                                                                                                                                                                                                                                                                                                                                                                                                                                                                                                                                                                                                                                                                                                                                                                                                                                                                                                                                                                                                                                                                                                                                                                                                                                                                                                                                                                                                                                                                                                                                                                                                                                                                                                                                                                                                                                                                                                                                                                                                                                                                                                                                                                                                                                                                                                                                                                                                                                                                                                                                                                                                                                                                                                                                                                                                                                                                                                                                                                                                                                                                                                                                                                                                                                                                                                                                                                                                                                                                                                                                                                                                                                                                                                                                                                                                                                                                                                                                                                                                                                                                                                                                                                                                                                                                                                                                                                                                                                                                                                                                                                                                                                                                                                                                                                                                                                                                                                                                                                                                                                                                                                                                                                                                                                                                                                                                                                                                                                                                                                                                                                                                                                                                                                                                                                                                                                                                                                                                                                                                                                                                                                                                                                                                                                                                                                                                                                                                                                                                                                                                                                                                                                                                                                                                                                                                                                                                                                                                                                                                                                                                                     |                                                             |                                                                                                                                                   |                                                                                                                                                                                                                                                                                                                                                                                                                                                                                                                                                                                                                                                                                                                                                                                                                                                                                                                                                                                                                                                                                                                                                                                                                                                                                                                                                                                                                                                                                                                                                                                                  |
|---------------------------------------------------------------------------------------------------------------------------------------------------------------------------------------------------------------------------------------------------------------------------------------------------------------------------------------------------------------------------------------------------------------------------------------------------------------------------------------------------------------------------------------------------------------------------------------------------------------------------------------------------------------------------------------------------------------------------------------------------------------------------------------------------------------------------------------------------------------------------------------------------------------------------------------------------------------------------------------------------------------------------------------------------------------------------------------------------------------------------------------------------------------------------------------------------------------------------------------------------------------------------------------------------------------------------------------------------------------------------------------------------------------------------------------------------------------------------------------------------------------------------------------------------------------------------------------------------------------------------------------------------------------------------------------------------------------------------------------------------------------------------------------------------------------------------------------------------------------------------------------------------------------------------------------------------------------------------------------------------------------------------------------------------------------------------------------------------------------------------------------------------------------------------------------------------------------------------------------------------------------------------------------------------------------------------------------------------------------------------------------------------------------------------------------------------------------------------------------------------------------------------------------------------------------------------------------------------------------------------------------------------------------------------------------------------------------------------------------------------------------------------------------------------------------------------------------------------------------------------------------------------------------------------------------------------------------------------------------------------------------------------------------------------------------------------------------------------------------------------------------------------------------------------------------------------------------------------------------------------------------------------------------------------------------------------------------------------------------------------------------------------------------------------------------------------------------------------------------------------------------------------------------------------------------------------------------------------------------------------------------------------------------------------------------------------------------------------------------------------------------------------------------------------------------------------------------------------------------------------------------------------------------------------------------------------------------------------------------------------------------------------------------------------------------------------------------------------------------------------------------------------------------------------------------------------------------------------------------------------------------------------------------------------------------------------------------------------------------------------------------------------------------------------------------------------------------------------------------------------------------------------------------------------------------------------------------------------------------------------------------------------------------------------------------------------------------------------------------------------------------------------------------------------------------------------------------------------------------------------------------------------------------------------------------------------------------------------------------------------------------------------------------------------------------------------------------------------------------------------------------------------------------------------------------------------------------------------------------------------------------------------------------------------------------------------------------------------------------------------------------------------------------------------------------------------------------------------------------------------------------------------------------------------------------------------------------------------------------------------------------------------------------------------------------------------------------------------------------------------------------------------------------------------------------------------------------------------------------------------------------------------------------------------------------------------------------------------------------------------------------------------------------------------------------------------------------------------------------------------------------------------------------------------------------------------------------------------------------------------------------------------------------------------------------------------------------------------------------------------------------------------------------------------------------------------------------------------------------------------------------------------------------------------------------------------------------------------------------------------------------------------------------------------------------------------------------------------------------------------------------------------------------------------------------------------------------------------------------------------------------------------------------------------------------------------------------------------------------------------------------------------------------------------------------------------------------------------------------------------------------------------------------------------------------------------------------------------------------------------------------------------------------------------------------------------------------------------------------------------------------------------------------------------------------------------------------------------------------------------------------------------------------------------------------------------------------------------------------------------------------------------------------------------------------------------------------------------------------------------------------------------------------------------------------------------------------------------------------------------------------------------------------------------------------------------------------------------------------------------------------------------------------------------------------------------------------------------------------------------------------------------------------------------------------------------------------------------------------------------------------------------------------------------------------------------------------------------------------------------------------------------------------------------------------------------------------------------------------------------------------------------------------------------------------------------------------------------------------------------------------------------------------------------------------------------------------------------------------------------------------------------------------------------------------------------------------------------------------------------------------------------------------------------------------------------------------------------------------------------------------------------------------------------------------------------------------------------------------------------------------------------------------------------------------------------------------------------------------------------------------------------------------------------------------------------------------------------------------------------------------------------------------------------------------------------------------------------------------------------------------------------------------------------------------------------------------------------------------------------------------------------------------------------------------------------------------------------------------------------------------------|-------------------------------------------------------------|---------------------------------------------------------------------------------------------------------------------------------------------------|--------------------------------------------------------------------------------------------------------------------------------------------------------------------------------------------------------------------------------------------------------------------------------------------------------------------------------------------------------------------------------------------------------------------------------------------------------------------------------------------------------------------------------------------------------------------------------------------------------------------------------------------------------------------------------------------------------------------------------------------------------------------------------------------------------------------------------------------------------------------------------------------------------------------------------------------------------------------------------------------------------------------------------------------------------------------------------------------------------------------------------------------------------------------------------------------------------------------------------------------------------------------------------------------------------------------------------------------------------------------------------------------------------------------------------------------------------------------------------------------------------------------------------------------------------------------------------------------------|
| EPI_ISL_1302236, EPI_ISL_1302237, EPI_ISL_1302238, EPI_ISL_1302244, EPI_ISL_1302248, EPI_ISL_1302251, EPI_ISL_1302261, EPI_ISL_1302266, EPI_ISL_1302270, EPI_ISL_1302272, EPI_ISL_1302275, EPI_ISL_1302281, EPI_ISL_1302282, EPI_ISL_1302284, EPI_ISL_1302285, EPI_ISL_1302288, EPI_ISL_1302294, EPI_ISL_1302311, EPI_ISL_1302315, EPI_ISL_1302318, EPI_ISL_1302324, EPI_ISL_1302332, EPI_ISL_1302341, EPI_ISL_1302347, EPI_ISL_1302348, EPI_ISL_1302351, EPI_ISL_1302352, EPI_ISL_1302353, EPI_ISL_1302355, EPI_ISL_1302359, EPI_ISL_1302362, EPI_ISL_1302367, EPI_ISL_1302370, EPI_ISL_1302372, EPI_ISL_1302378, EPI_ISL_1302379, EPI_ISL_1302390, EPI_ISL_1302392, EPI_ISL_1302393, EPI_ISL_1302401                                                                                                                                                                                                                                                                                                                                                                                                                                                                                                                                                                                                                                                                                                                                                                                                                                                                                                                                                                                                                                                                                                                                                                                                                                                                                                                                                                                                                                                                                                                                                                                                                                                                                                                                                                                                                                                                                                                                                                                                                                                                                                                                                                                                                                                                                                                                                                                                                                                                                                                                                                                                                                                                                                                                                                                                                                                                                                                                                                                                                                                                                                                                                                                                                                                                                                                                                                                                                                                                                                                                                                                                                                                                                                                                                                                                                                                                                                                                                                                                                                                                                                                                                                                                                                                                                                                                                                                                                                                                                                                                                                                                                                                                                                                                                                                                                                                                                                                                                                                                                                                                                                                                                                                                                                                                                                                                                                                                                                                                                                                                                                                                                                                                                                                                                                                                                                                                                                                                                                                                                                                                                                                                                                                                                                                                                                                                                                                                                                                                                                                                                                                                                                                                                                                                                                                                                                                                                                                                                                                                                                                                                                                                                                                                                                                                                                                                                                                                                                                                                                                                                                                                                                                                                                                                                                                                                                                                                                                                                                                                                                                                                                                                                                                                                                                                                                                                                                                                                                                                                                                                                                                                                                                                                                                                                                                                                                                                                                                                                                                                                                                              |                                                             |                                                                                                                                                   |                                                                                                                                                                                                                                                                                                                                                                                                                                                                                                                                                                                                                                                                                                                                                                                                                                                                                                                                                                                                                                                                                                                                                                                                                                                                                                                                                                                                                                                                                                                                                                                                  |
| see above                                                                                                                                                                                                                                                                                                                                                                                                                                                                                                                                                                                                                                                                                                                                                                                                                                                                                                                                                                                                                                                                                                                                                                                                                                                                                                                                                                                                                                                                                                                                                                                                                                                                                                                                                                                                                                                                                                                                                                                                                                                                                                                                                                                                                                                                                                                                                                                                                                                                                                                                                                                                                                                                                                                                                                                                                                                                                                                                                                                                                                                                                                                                                                                                                                                                                                                                                                                                                                                                                                                                                                                                                                                                                                                                                                                                                                                                                                                                                                                                                                                                                                                                                                                                                                                                                                                                                                                                                                                                                                                                                                                                                                                                                                                                                                                                                                                                                                                                                                                                                                                                                                                                                                                                                                                                                                                                                                                                                                                                                                                                                                                                                                                                                                                                                                                                                                                                                                                                                                                                                                                                                                                                                                                                                                                                                                                                                                                                                                                                                                                                                                                                                                                                                                                                                                                                                                                                                                                                                                                                                                                                                                                                                                                                                                                                                                                                                                                                                                                                                                                                                                                                                                                                                                                                                                                                                                                                                                                                                                                                                                                                                                                                                                                                                                                                                                                                                                                                                                                                                                                                                                                                                                                                                                                                                                                                                                                                                                                                                                                                                                                                                                                                                                                                                                                                                                                                                                                                                                                                                                                                                                                                                                                                                                                                                           | Laboratorio Central de Epidemiología IMSS                   | Instituto de Biotecnología de la UNAM                                                                                                             | Alejandra Hernández-Terán; Alejandro Sánchez-Flores; Alma Rincón-Rubio; Andrea Santos Coy-Arechevalta; Authors from IBT; Blanca Taboada; Celia Boukadida; Clara Esperanza Santacruz-Tinoco; Edgar Medianti-Condado; Eduardo Becerril-Vargas; Fidencio Mejía-Nepomuceno; Francisco Pulido; Gisela Barrera-Badillo; Gloria Vazquez; Hector Esteban Paz-Juárez; IMSS; INDRé and INER (in alphabetical order); Carlos F. Arias; Irma Lopez-Martinez; Jerome Jean Verleyen; Joel Armando Vázquez-Pérez; Jorge Salas-Hernández; José Arturo Martínez-Orozco; José Ernesto Ramirez-González; José Esteban Muñoz-Medina; Larissa Fernandez-Matano; Juan Hernandez-Rivas; Luis Alberto Ochoa-Carrera; Margarita Matias-Florentino; Mario Mujica-Sánchez; Natividad Cruz-Ortiz; Pavel Isa; Ricardo Grande; Santiago Avila-Rios; Tatiana Nunez-Garcia; Teresita Rojas-Mendoza                                                                                                                                                                                                                                                                                                                                                                                                                                                                                                                                                                                                                                                                                                                               |
| EPI_ISL_2402182, EPI_ISL_2402183, EPI_ISL_2402184, EPI_ISL_2402185, EPI_ISL_2402186, EPI_ISL_2402187, EPI_ISL_2402188, EPI_ISL_2402189, EPI_ISL_2402190, EPI_ISL_2402191, EPI_ISL_2402192, EPI_ISL_2402193, EPI_ISL_2402194, EPI_ISL_2402195, EPI_ISL_2402196, EPI_ISL_2402197, EPI_ISL_2402198, EPI_ISL_2402199, EPI_ISL_2402200, EPI_ISL_2402201, EPI_ISL_2402202, EPI_ISL_2402205, EPI_ISL_2402206, EPI_ISL_2402207, EPI_ISL_2402208, EPI_ISL_2402209, EPI_ISL_2402210, EPI_ISL_2402211, EPI_ISL_2402212, EPI_ISL_2402213, EPI_ISL_2402214, EPI_ISL_2402215, EPI_ISL_2402217, EPI_ISL_2402218, EPI_ISL_2402219, EPI_ISL_2402220, EPI_ISL_2402221, EPI_ISL_2402222, EPI_ISL_2402223, EPI_ISL_2402224, EPI_ISL_2402226, EPI_ISL_2402227, EPI_ISL_2402228                                                                                                                                                                                                                                                                                                                                                                                                                                                                                                                                                                                                                                                                                                                                                                                                                                                                                                                                                                                                                                                                                                                                                                                                                                                                                                                                                                                                                                                                                                                                                                                                                                                                                                                                                                                                                                                                                                                                                                                                                                                                                                                                                                                                                                                                                                                                                                                                                                                                                                                                                                                                                                                                                                                                                                                                                                                                                                                                                                                                                                                                                                                                                                                                                                                                                                                                                                                                                                                                                                                                                                                                                                                                                                                                                                                                                                                                                                                                                                                                                                                                                                                                                                                                                                                                                                                                                                                                                                                                                                                                                                                                                                                                                                                                                                                                                                                                                                                                                                                                                                                                                                                                                                                                                                                                                                                                                                                                                                                                                                                                                                                                                                                                                                                                                                                                                                                                                                                                                                                                                                                                                                                                                                                                                                                                                                                                                                                                                                                                                                                                                                                                                                                                                                                                                                                                                                                                                                                                                                                                                                                                                                                                                                                                                                                                                                                                                                                                                                                                                                                                                                                                                                                                                                                                                                                                                                                                                                                                                                                                                                                                                                                                                                                                                                                                                                                                                                                                                                                                                                                                                                                                                                                                                                                                                                                                                                                                                                                                                                                                           |                                                             |                                                                                                                                                   |                                                                                                                                                                                                                                                                                                                                                                                                                                                                                                                                                                                                                                                                                                                                                                                                                                                                                                                                                                                                                                                                                                                                                                                                                                                                                                                                                                                                                                                                                                                                                                                                  |
| see above                                                                                                                                                                                                                                                                                                                                                                                                                                                                                                                                                                                                                                                                                                                                                                                                                                                                                                                                                                                                                                                                                                                                                                                                                                                                                                                                                                                                                                                                                                                                                                                                                                                                                                                                                                                                                                                                                                                                                                                                                                                                                                                                                                                                                                                                                                                                                                                                                                                                                                                                                                                                                                                                                                                                                                                                                                                                                                                                                                                                                                                                                                                                                                                                                                                                                                                                                                                                                                                                                                                                                                                                                                                                                                                                                                                                                                                                                                                                                                                                                                                                                                                                                                                                                                                                                                                                                                                                                                                                                                                                                                                                                                                                                                                                                                                                                                                                                                                                                                                                                                                                                                                                                                                                                                                                                                                                                                                                                                                                                                                                                                                                                                                                                                                                                                                                                                                                                                                                                                                                                                                                                                                                                                                                                                                                                                                                                                                                                                                                                                                                                                                                                                                                                                                                                                                                                                                                                                                                                                                                                                                                                                                                                                                                                                                                                                                                                                                                                                                                                                                                                                                                                                                                                                                                                                                                                                                                                                                                                                                                                                                                                                                                                                                                                                                                                                                                                                                                                                                                                                                                                                                                                                                                                                                                                                                                                                                                                                                                                                                                                                                                                                                                                                                                                                                                                                                                                                                                                                                                                                                                                                                                                                                                                                                                                           | Laboratorio Central de Epidemiología (LCE)                  | Unidad de Genómica Avanzada                                                                                                                       | Alejandra Sanchez-Flores; Alfredo Herrera-Estrella; Alicia Ocana-Mondragon; Angel Gustavo Salas-Lais; Bernardo Martínez-Miguel; Blanca Taboada; Brenda Inrasema Maldonado-Meza; Carla Ivon Herrera-Najera; Carlos F. Arias; Celia Boukadida; Clara Esperanza Santacruz-Tinoco; Concepcion Grajales-Muniz; Consorcio Mexicano de Vigilancia Genómica (CoVGen-Mex); Authors (in alphabetical order): Julio Elias Lopez-Martinez; Fernando Fontove-Herrera; Francisco Pulido; Gloria Elena Espinosa-Ayala; Gloria María Molina-Salinas; Gloria Vazquez; Hector Esteban Paz-Juarez; Hector Montoya-Fuentes; Helen Haydee Fernanda Ramirez-Plascencia; Jorge Ivan Salinas-Navarez; Jose Antonio Enciso-Moreno; Jose Esteban Munoz-Medina; Jose de Jesus Nunez-Contreras; Juan Bautista Chale-Dzul; Luis Alberto Ochoa-Carrera; Margarita Matias-Florentino; Maria Guadalupe Santiago-Mauricio; Maria Guadalupe de Jesus Mireles-Rivera; Nelly Selem-Mojica; Pavel Isa; Ricardo Grande; Santiago Avila-Rios; Victor Hugo Borja-Aburto                                                                                                                                                                                                                                                                                                                                                                                                                                                                                                                                                                  |
| EPI_ISL_2102600, EPI_ISL_2102611, EPI_ISL_2102612, EPI_ISL_2102621, EPI_ISL_2102625, EPI_ISL_2102626, EPI_ISL_2102629, EPI_ISL_2102630, EPI_ISL_2102632, EPI_ISL_2102633, EPI_ISL_2102634, EPI_ISL_2102645, EPI_ISL_2102646, EPI_ISL_2102647, EPI_ISL_2102649, EPI_ISL_2102650, EPI_ISL_2102651, EPI_ISL_2102652, EPI_ISL_2102659, EPI_ISL_2102660, EPI_ISL_2102677                                                                                                                                                                                                                                                                                                                                                                                                                                                                                                                                                                                                                                                                                                                                                                                                                                                                                                                                                                                                                                                                                                                                                                                                                                                                                                                                                                                                                                                                                                                                                                                                                                                                                                                                                                                                                                                                                                                                                                                                                                                                                                                                                                                                                                                                                                                                                                                                                                                                                                                                                                                                                                                                                                                                                                                                                                                                                                                                                                                                                                                                                                                                                                                                                                                                                                                                                                                                                                                                                                                                                                                                                                                                                                                                                                                                                                                                                                                                                                                                                                                                                                                                                                                                                                                                                                                                                                                                                                                                                                                                                                                                                                                                                                                                                                                                                                                                                                                                                                                                                                                                                                                                                                                                                                                                                                                                                                                                                                                                                                                                                                                                                                                                                                                                                                                                                                                                                                                                                                                                                                                                                                                                                                                                                                                                                                                                                                                                                                                                                                                                                                                                                                                                                                                                                                                                                                                                                                                                                                                                                                                                                                                                                                                                                                                                                                                                                                                                                                                                                                                                                                                                                                                                                                                                                                                                                                                                                                                                                                                                                                                                                                                                                                                                                                                                                                                                                                                                                                                                                                                                                                                                                                                                                                                                                                                                                                                                                                                                                                                                                                                                                                                                                                                                                                                                                                                                                                                                 | see above                                                   | Laboratorio Estatal de Salud Publica de Nuevo Leon                                                                                                | Laboratorio Estatal de Salud Publica de Nuevo Leon<br>(in alphabetical order) Consuelo Treviño-Garza; Eduardo Isaac de la Rosa-Moreno; Elise del Carmen García-García; Gloria Alejandra Jasso-de la Peña; Manuel Enrique de la O-Cavazos; Olín Medina-Chávez; Yulianna Mayre Cordero-Cruz                                                                                                                                                                                                                                                                                                                                                                                                                                                                                                                                                                                                                                                                                                                                                                                                                                                                                                                                                                                                                                                                                                                                                                                                                                                                                                        |
| EPI_ISL_979340, EPI_ISL_979343, EPI_ISL_1091253                                                                                                                                                                                                                                                                                                                                                                                                                                                                                                                                                                                                                                                                                                                                                                                                                                                                                                                                                                                                                                                                                                                                                                                                                                                                                                                                                                                                                                                                                                                                                                                                                                                                                                                                                                                                                                                                                                                                                                                                                                                                                                                                                                                                                                                                                                                                                                                                                                                                                                                                                                                                                                                                                                                                                                                                                                                                                                                                                                                                                                                                                                                                                                                                                                                                                                                                                                                                                                                                                                                                                                                                                                                                                                                                                                                                                                                                                                                                                                                                                                                                                                                                                                                                                                                                                                                                                                                                                                                                                                                                                                                                                                                                                                                                                                                                                                                                                                                                                                                                                                                                                                                                                                                                                                                                                                                                                                                                                                                                                                                                                                                                                                                                                                                                                                                                                                                                                                                                                                                                                                                                                                                                                                                                                                                                                                                                                                                                                                                                                                                                                                                                                                                                                                                                                                                                                                                                                                                                                                                                                                                                                                                                                                                                                                                                                                                                                                                                                                                                                                                                                                                                                                                                                                                                                                                                                                                                                                                                                                                                                                                                                                                                                                                                                                                                                                                                                                                                                                                                                                                                                                                                                                                                                                                                                                                                                                                                                                                                                                                                                                                                                                                                                                                                                                                                                                                                                                                                                                                                                                                                                                                                                                                                                                                     | Laboratorio Estatal de Salud Pública de Nuevo León          | Laboratorio de Fitoecología Molecular, Departamento de Bioquímica y Medicina Molecular, Facultad de Medicina - Universidad Autónoma de Nuevo León | Ana M. Rivas-Estilla; Consuelo Treviño-Garza; Daniel Arellanos-Soto; Elise del Carmen García-García; Gloria A. Jasso-de-la-Peña; Kame A. Galán-Huerta; Manuel E. de-la-O-Cavazos; María F. Herrera-Saldivar; Natalia Martínez-Acuña; Roberto Montes-de-Oca; Samuel Buentello-Wong; Sonia A. Lozano-Sepúlveda                                                                                                                                                                                                                                                                                                                                                                                                                                                                                                                                                                                                                                                                                                                                                                                                                                                                                                                                                                                                                                                                                                                                                                                                                                                                                     |
| EPI_ISL_794592                                                                                                                                                                                                                                                                                                                                                                                                                                                                                                                                                                                                                                                                                                                                                                                                                                                                                                                                                                                                                                                                                                                                                                                                                                                                                                                                                                                                                                                                                                                                                                                                                                                                                                                                                                                                                                                                                                                                                                                                                                                                                                                                                                                                                                                                                                                                                                                                                                                                                                                                                                                                                                                                                                                                                                                                                                                                                                                                                                                                                                                                                                                                                                                                                                                                                                                                                                                                                                                                                                                                                                                                                                                                                                                                                                                                                                                                                                                                                                                                                                                                                                                                                                                                                                                                                                                                                                                                                                                                                                                                                                                                                                                                                                                                                                                                                                                                                                                                                                                                                                                                                                                                                                                                                                                                                                                                                                                                                                                                                                                                                                                                                                                                                                                                                                                                                                                                                                                                                                                                                                                                                                                                                                                                                                                                                                                                                                                                                                                                                                                                                                                                                                                                                                                                                                                                                                                                                                                                                                                                                                                                                                                                                                                                                                                                                                                                                                                                                                                                                                                                                                                                                                                                                                                                                                                                                                                                                                                                                                                                                                                                                                                                                                                                                                                                                                                                                                                                                                                                                                                                                                                                                                                                                                                                                                                                                                                                                                                                                                                                                                                                                                                                                                                                                                                                                                                                                                                                                                                                                                                                                                                                                                                                                                                                                      | Laboratorio Estatal de Salud Pública de Tamaulipas          | Instituto de diagnóstico y Referencia Epidemiológicos (INDRE)                                                                                     | Abril Rodríguez-Maldonado; Ana Maria Cortez-Calderon; Bernardita Reyes-Berrones; Celia Alpuche-Aranda; Claudia Wong-Arambula; Ernesto Ramirez-Gonzalez.; Fabiola Garcés-Ayala; Gisela Barrera-Badillo; Gloria Molina-Gambo; Hilda del Carmen-Selvera; Hugo Lopez Gatell-Ramirez; Irma Lopez-Martinez; Jose Luis Alomia-Zegarra; Lucia Hernandez-Rivas                                                                                                                                                                                                                                                                                                                                                                                                                                                                                                                                                                                                                                                                                                                                                                                                                                                                                                                                                                                                                                                                                                                                                                                                                                            |
| EPI_ISL_1789696, EPI_ISL_1789697, EPI_ISL_1789699                                                                                                                                                                                                                                                                                                                                                                                                                                                                                                                                                                                                                                                                                                                                                                                                                                                                                                                                                                                                                                                                                                                                                                                                                                                                                                                                                                                                                                                                                                                                                                                                                                                                                                                                                                                                                                                                                                                                                                                                                                                                                                                                                                                                                                                                                                                                                                                                                                                                                                                                                                                                                                                                                                                                                                                                                                                                                                                                                                                                                                                                                                                                                                                                                                                                                                                                                                                                                                                                                                                                                                                                                                                                                                                                                                                                                                                                                                                                                                                                                                                                                                                                                                                                                                                                                                                                                                                                                                                                                                                                                                                                                                                                                                                                                                                                                                                                                                                                                                                                                                                                                                                                                                                                                                                                                                                                                                                                                                                                                                                                                                                                                                                                                                                                                                                                                                                                                                                                                                                                                                                                                                                                                                                                                                                                                                                                                                                                                                                                                                                                                                                                                                                                                                                                                                                                                                                                                                                                                                                                                                                                                                                                                                                                                                                                                                                                                                                                                                                                                                                                                                                                                                                                                                                                                                                                                                                                                                                                                                                                                                                                                                                                                                                                                                                                                                                                                                                                                                                                                                                                                                                                                                                                                                                                                                                                                                                                                                                                                                                                                                                                                                                                                                                                                                                                                                                                                                                                                                                                                                                                                                                                                                                                                                                   | Laboratorio PGM                                             | Laboratorio de Fitoecología Molecular, Departamento de Bioquímica y Medicina Molecular, Facultad de Medicina - Universidad Autónoma de Nuevo León | Ana M. Rivas-Estilla; Daniel Arellanos-Soto; Eduardo Garza-de-la-Peña; Gabriela Elizondo; Javier Ramos-Jimenez; Kame A. Galán-Huerta; María F. Herrera-Saldivar; Natalia Martínez-Acuña; Sonia A. Lozano-Sepúlveda                                                                                                                                                                                                                                                                                                                                                                                                                                                                                                                                                                                                                                                                                                                                                                                                                                                                                                                                                                                                                                                                                                                                                                                                                                                                                                                                                                               |
| EPI_ISL_3044157, EPI_ISL_3044475, EPI_ISL_3044671, EPI_ISL_3045055, EPI_ISL_3045057, EPI_ISL_3045058, EPI_ISL_3045059, EPI_ISL_3055571, EPI_ISL_3055572, EPI_ISL_3055573, EPI_ISL_3055574, EPI_ISL_3055575, EPI_ISL_3055576, EPI_ISL_3055577, EPI_ISL_3055578, EPI_ISL_3055580, EPI_ISL_3055581, EPI_ISL_3055582, EPI_ISL_3055583                                                                                                                                                                                                                                                                                                                                                                                                                                                                                                                                                                                                                                                                                                                                                                                                                                                                                                                                                                                                                                                                                                                                                                                                                                                                                                                                                                                                                                                                                                                                                                                                                                                                                                                                                                                                                                                                                                                                                                                                                                                                                                                                                                                                                                                                                                                                                                                                                                                                                                                                                                                                                                                                                                                                                                                                                                                                                                                                                                                                                                                                                                                                                                                                                                                                                                                                                                                                                                                                                                                                                                                                                                                                                                                                                                                                                                                                                                                                                                                                                                                                                                                                                                                                                                                                                                                                                                                                                                                                                                                                                                                                                                                                                                                                                                                                                                                                                                                                                                                                                                                                                                                                                                                                                                                                                                                                                                                                                                                                                                                                                                                                                                                                                                                                                                                                                                                                                                                                                                                                                                                                                                                                                                                                                                                                                                                                                                                                                                                                                                                                                                                                                                                                                                                                                                                                                                                                                                                                                                                                                                                                                                                                                                                                                                                                                                                                                                                                                                                                                                                                                                                                                                                                                                                                                                                                                                                                                                                                                                                                                                                                                                                                                                                                                                                                                                                                                                                                                                                                                                                                                                                                                                                                                                                                                                                                                                                                                                                                                                                                                                                                                                                                                                                                                                                                                                                                                                                                                                   | see above                                                   | Laboratorio de salud publica Puebla                                                                                                               | LABOPAT<br>Cynthia Penalzo; Luis Mendoza; Silvia Montilla                                                                                                                                                                                                                                                                                                                                                                                                                                                                                                                                                                                                                                                                                                                                                                                                                                                                                                                                                                                                                                                                                                                                                                                                                                                                                                                                                                                                                                                                                                                                        |
| EPI_ISL_1340619, EPI_ISL_1340634, EPI_ISL_1340654                                                                                                                                                                                                                                                                                                                                                                                                                                                                                                                                                                                                                                                                                                                                                                                                                                                                                                                                                                                                                                                                                                                                                                                                                                                                                                                                                                                                                                                                                                                                                                                                                                                                                                                                                                                                                                                                                                                                                                                                                                                                                                                                                                                                                                                                                                                                                                                                                                                                                                                                                                                                                                                                                                                                                                                                                                                                                                                                                                                                                                                                                                                                                                                                                                                                                                                                                                                                                                                                                                                                                                                                                                                                                                                                                                                                                                                                                                                                                                                                                                                                                                                                                                                                                                                                                                                                                                                                                                                                                                                                                                                                                                                                                                                                                                                                                                                                                                                                                                                                                                                                                                                                                                                                                                                                                                                                                                                                                                                                                                                                                                                                                                                                                                                                                                                                                                                                                                                                                                                                                                                                                                                                                                                                                                                                                                                                                                                                                                                                                                                                                                                                                                                                                                                                                                                                                                                                                                                                                                                                                                                                                                                                                                                                                                                                                                                                                                                                                                                                                                                                                                                                                                                                                                                                                                                                                                                                                                                                                                                                                                                                                                                                                                                                                                                                                                                                                                                                                                                                                                                                                                                                                                                                                                                                                                                                                                                                                                                                                                                                                                                                                                                                                                                                                                                                                                                                                                                                                                                                                                                                                                                                                                                                                                                   | Laboratorios BIMODI                                         | Instituto de Diagnostico y Referencia Epidemiologicos (INDRE)                                                                                     | Abril Rodriguez-Maldonado; Ariadna Medina-Benitez; Claudia Wong-Arambula; Ernesto Ramirez-Gonzalez.; Gisela Barrera-Badillo; Irma Lopez-Martinez; Joaquin Quiroz-Mercado; Lucia Hernandez-Rivas; Natividad Cruz-Ortiz; Sergio Rangel-Guerrero; Tatiana Nunez-Garcia; Vanessa Rivero-Arredondo                                                                                                                                                                                                                                                                                                                                                                                                                                                                                                                                                                                                                                                                                                                                                                                                                                                                                                                                                                                                                                                                                                                                                                                                                                                                                                    |
| EPI_ISL_1340613                                                                                                                                                                                                                                                                                                                                                                                                                                                                                                                                                                                                                                                                                                                                                                                                                                                                                                                                                                                                                                                                                                                                                                                                                                                                                                                                                                                                                                                                                                                                                                                                                                                                                                                                                                                                                                                                                                                                                                                                                                                                                                                                                                                                                                                                                                                                                                                                                                                                                                                                                                                                                                                                                                                                                                                                                                                                                                                                                                                                                                                                                                                                                                                                                                                                                                                                                                                                                                                                                                                                                                                                                                                                                                                                                                                                                                                                                                                                                                                                                                                                                                                                                                                                                                                                                                                                                                                                                                                                                                                                                                                                                                                                                                                                                                                                                                                                                                                                                                                                                                                                                                                                                                                                                                                                                                                                                                                                                                                                                                                                                                                                                                                                                                                                                                                                                                                                                                                                                                                                                                                                                                                                                                                                                                                                                                                                                                                                                                                                                                                                                                                                                                                                                                                                                                                                                                                                                                                                                                                                                                                                                                                                                                                                                                                                                                                                                                                                                                                                                                                                                                                                                                                                                                                                                                                                                                                                                                                                                                                                                                                                                                                                                                                                                                                                                                                                                                                                                                                                                                                                                                                                                                                                                                                                                                                                                                                                                                                                                                                                                                                                                                                                                                                                                                                                                                                                                                                                                                                                                                                                                                                                                                                                                                                                                     | Laboratorios DIAGNOMOL                                      | Instituto de Diagnostico y Referencia Epidemiologicos (INDRE)                                                                                     | Abril Rodriguez-Maldonado; Ariadna Medina-Benitez; Claudia Wong-Arambula; Ernesto Ramirez-Gonzalez.; Gisela Barrera-Badillo; Irma Lopez-Martinez; Joaquin Quiroz-Mercado; Lucia Hernandez-Rivas; Natividad Cruz-Ortiz; Sergio Rangel-Guerrero; Tatiana Nunez-Garcia; Vanessa Rivero-Arredondo                                                                                                                                                                                                                                                                                                                                                                                                                                                                                                                                                                                                                                                                                                                                                                                                                                                                                                                                                                                                                                                                                                                                                                                                                                                                                                    |
| EPI_ISL_2680916, EPI_ISL_2680917, EPI_ISL_2680920, EPI_ISL_2680923, EPI_ISL_2680924, EPI_ISL_2680927, EPI_ISL_2680928, EPI_ISL_2680929, EPI_ISL_2680930, EPI_ISL_2680931, EPI_ISL_2680932, EPI_ISL_2680933, EPI_ISL_2680934, EPI_ISL_2680935, EPI_ISL_2680936, EPI_ISL_2680937, EPI_ISL_2680938, EPI_ISL_2680939, EPI_ISL_2680940, EPI_ISL_2680941, EPI_ISL_2680942, EPI_ISL_2680943, EPI_ISL_2680944, EPI_ISL_2680945, EPI_ISL_2680946, EPI_ISL_2680947, EPI_ISL_2680948, EPI_ISL_2680949, EPI_ISL_2680950, EPI_ISL_2680951, EPI_ISL_2680952, EPI_ISL_2680953, EPI_ISL_2680954, EPI_ISL_2680955, EPI_ISL_2680956, EPI_ISL_2680957, EPI_ISL_2680958, EPI_ISL_2680959, EPI_ISL_2680960, EPI_ISL_2680961, EPI_ISL_2680962, EPI_ISL_2680963, EPI_ISL_2680964, EPI_ISL_2680965, EPI_ISL_2680966, EPI_ISL_2680967                                                                                                                                                                                                                                                                                                                                                                                                                                                                                                                                                                                                                                                                                                                                                                                                                                                                                                                                                                                                                                                                                                                                                                                                                                                                                                                                                                                                                                                                                                                                                                                                                                                                                                                                                                                                                                                                                                                                                                                                                                                                                                                                                                                                                                                                                                                                                                                                                                                                                                                                                                                                                                                                                                                                                                                                                                                                                                                                                                                                                                                                                                                                                                                                                                                                                                                                                                                                                                                                                                                                                                                                                                                                                                                                                                                                                                                                                                                                                                                                                                                                                                                                                                                                                                                                                                                                                                                                                                                                                                                                                                                                                                                                                                                                                                                                                                                                                                                                                                                                                                                                                                                                                                                                                                                                                                                                                                                                                                                                                                                                                                                                                                                                                                                                                                                                                                                                                                                                                                                                                                                                                                                                                                                                                                                                                                                                                                                                                                                                                                                                                                                                                                                                                                                                                                                                                                                                                                                                                                                                                                                                                                                                                                                                                                                                                                                                                                                                                                                                                                                                                                                                                                                                                                                                                                                                                                                                                                                                                                                                                                                                                                                                                                                                                                                                                                                                                                                                                                                                                                                                                                                                                                                                                                                                                                                                                                                                                                                                                        | see above                                                   | Laboratorios Delia Barraza                                                                                                                        |                                                                                                                                                                                                                                                                                                                                                                                                                                                                                                                                                                                                                                                                                                                                                                                                                                                                                                                                                                                                                                                                                                                                                                                                                                                                                                                                                                                                                                                                                                                                                                                                  |
|                                                                                                                                                                                                                                                                                                                                                                                                                                                                                                                                                                                                                                                                                                                                                                                                                                                                                                                                                                                                                                                                                                                                                                                                                                                                                                                                                                                                                                                                                                                                                                                                                                                                                                                                                                                                                                                                                                                                                                                                                                                                                                                                                                                                                                                                                                                                                                                                                                                                                                                                                                                                                                                                                                                                                                                                                                                                                                                                                                                                                                                                                                                                                                                                                                                                                                                                                                                                                                                                                                                                                                                                                                                                                                                                                                                                                                                                                                                                                                                                                                                                                                                                                                                                                                                                                                                                                                                                                                                                                                                                                                                                                                                                                                                                                                                                                                                                                                                                                                                                                                                                                                                                                                                                                                                                                                                                                                                                                                                                                                                                                                                                                                                                                                                                                                                                                                                                                                                                                                                                                                                                                                                                                                                                                                                                                                                                                                                                                                                                                                                                                                                                                                                                                                                                                                                                                                                                                                                                                                                                                                                                                                                                                                                                                                                                                                                                                                                                                                                                                                                                                                                                                                                                                                                                                                                                                                                                                                                                                                                                                                                                                                                                                                                                                                                                                                                                                                                                                                                                                                                                                                                                                                                                                                                                                                                                                                                                                                                                                                                                                                                                                                                                                                                                                                                                                                                                                                                                                                                                                                                                                                                                                                                                                                                                                                     |                                                             | Laboratorio nacional-LANIIA-CIAD                                                                                                                  | Alejandra García-Gasca; Alejandra Hernández-Terán; Alejandro Sánchez-Flores; Alfredo Herrera-Estrella; Alicia Ocana-Mondragón; Andreu Comas-García; Angel Gustavo Salas-Lais; Antonio Loza Román; Bernardo Martínez-Miguel; Blanca Taboada; Brenda Inrasema Maldonado-Meza; Bruno Gómez-Gil; Carla Ivón Herrera-Najera; Carlos F. Arias; Celia Boukadida; Clara Esperanza Santacruz-Tinoco; Claudia Soto-Félix; Concepción Grajales-Muniz; Consorcio Mexicano de Vigilancia Genómica (CoVigGen-Mex); Authors (in alphabetical order): Julio Elias Lopez-Martinez; Fernando Fontove-Herrera; Fidencio Mejía-Nepomuceno; Francisco Pulido; Gloria Elena Espinosa-Ayala; Gloria María Molina-Salinas; Gloria Vazquez; Hector Esteban Paz-Juárez; Hector Montoya-Fuentes; Helen Haydee Fernanda Ramirez-Plascencia; Irvin González-López; Jean Pierre González; Jesús Hernández; Joel Armando Vázquez-Pérez; Laboratorios Delia Barraza; Maria Delia Barraza Sámano; Jorge Salas-Hernández; José Antonio Enciso-Moreno; José Arturo Martínez-Orozco; José Esteban Muñoz-Medina; José de Jesús Nuñez-Contreras; Juan Bautista Chale-Dzul; Juliisa Enciso-Ibarra; Luis Alberto Ochoa-Carrera; Margarita Matias-Florentino; Mario Mujica-Sánchez; Marissa Perez-Garcia; Maria Guadalupe Santiago-Mauricio; Maria Guadalupe de Jesús Mireles-Rivera; Melissa García Angulo.; Nelly Sélem-Mojica; Pavel Isa; Ricardo Garcia Merce; Ricardo Grande; Rosa María Gutiérrez Rios; Santiago Avila-Rios; Selene Aranda; Susana Lopez; Verónica Mata-Haro; Victor Eduardo Garcia-Arias; Victor Hugo Borja-Aburto |
| EPI_ISL_961466, EPI_ISL_1334380, EPI_ISL_1334382, EPI_ISL_1334383, EPI_ISL_1334384, EPI_ISL_1334385                                                                                                                                                                                                                                                                                                                                                                                                                                                                                                                                                                                                                                                                                                                                                                                                                                                                                                                                                                                                                                                                                                                                                                                                                                                                                                                                                                                                                                                                                                                                                                                                                                                                                                                                                                                                                                                                                                                                                                                                                                                                                                                                                                                                                                                                                                                                                                                                                                                                                                                                                                                                                                                                                                                                                                                                                                                                                                                                                                                                                                                                                                                                                                                                                                                                                                                                                                                                                                                                                                                                                                                                                                                                                                                                                                                                                                                                                                                                                                                                                                                                                                                                                                                                                                                                                                                                                                                                                                                                                                                                                                                                                                                                                                                                                                                                                                                                                                                                                                                                                                                                                                                                                                                                                                                                                                                                                                                                                                                                                                                                                                                                                                                                                                                                                                                                                                                                                                                                                                                                                                                                                                                                                                                                                                                                                                                                                                                                                                                                                                                                                                                                                                                                                                                                                                                                                                                                                                                                                                                                                                                                                                                                                                                                                                                                                                                                                                                                                                                                                                                                                                                                                                                                                                                                                                                                                                                                                                                                                                                                                                                                                                                                                                                                                                                                                                                                                                                                                                                                                                                                                                                                                                                                                                                                                                                                                                                                                                                                                                                                                                                                                                                                                                                                                                                                                                                                                                                                                                                                                                                                                                                                                                                                 | Laboratorios Lister                                         | Instituto de Diagnostico y Referencia Epidemiologicos (INDRE)                                                                                     | Abril Rodriguez-Maldonado; Ariadna Medina-Benitez; Claudia Wong-Arambula; Ernesto Ramirez-Gonzalez.; Fabiola Garcés-Ayala; Gisela Barrera-Badillo; Irma Lopez-Martinez; Joaquin Quiroz-Mercado; Lucia Hernandez-Rivas; Natividad Cruz-Ortiz; Sergio Rangel-Guerrero; Tatiana Nunez-Garcia; Vanessa Rivero-Arredondo                                                                                                                                                                                                                                                                                                                                                                                                                                                                                                                                                                                                                                                                                                                                                                                                                                                                                                                                                                                                                                                                                                                                                                                                                                                                              |
| EPI_ISL_2283686, EPI_ISL_2533802                                                                                                                                                                                                                                                                                                                                                                                                                                                                                                                                                                                                                                                                                                                                                                                                                                                                                                                                                                                                                                                                                                                                                                                                                                                                                                                                                                                                                                                                                                                                                                                                                                                                                                                                                                                                                                                                                                                                                                                                                                                                                                                                                                                                                                                                                                                                                                                                                                                                                                                                                                                                                                                                                                                                                                                                                                                                                                                                                                                                                                                                                                                                                                                                                                                                                                                                                                                                                                                                                                                                                                                                                                                                                                                                                                                                                                                                                                                                                                                                                                                                                                                                                                                                                                                                                                                                                                                                                                                                                                                                                                                                                                                                                                                                                                                                                                                                                                                                                                                                                                                                                                                                                                                                                                                                                                                                                                                                                                                                                                                                                                                                                                                                                                                                                                                                                                                                                                                                                                                                                                                                                                                                                                                                                                                                                                                                                                                                                                                                                                                                                                                                                                                                                                                                                                                                                                                                                                                                                                                                                                                                                                                                                                                                                                                                                                                                                                                                                                                                                                                                                                                                                                                                                                                                                                                                                                                                                                                                                                                                                                                                                                                                                                                                                                                                                                                                                                                                                                                                                                                                                                                                                                                                                                                                                                                                                                                                                                                                                                                                                                                                                                                                                                                                                                                                                                                                                                                                                                                                                                                                                                                                                                                                                                                                    | Lesp jalisco /Unidad de Patología                           | Instituto de Diagnostico y Referencia Epidemiologicos (INDRE)                                                                                     | Abril Rodriguez-Maldonado; Ariadna Medina-Benitez; Claudia Wong-Arambula; Ernesto Ramirez-Gonzalez.; Gisela Barrera-Badillo; Irma Lopez-Martinez; Joaquin Quiroz-Mercado; Lucia Hernandez-Rivas; Natividad Cruz-Ortiz; Sergio Rangel-Guerrero; Tatiana Nunez-Garcia; Vanessa Rivero-Arredondo                                                                                                                                                                                                                                                                                                                                                                                                                                                                                                                                                                                                                                                                                                                                                                                                                                                                                                                                                                                                                                                                                                                                                                                                                                                                                                    |
| EPI_ISL_1008713                                                                                                                                                                                                                                                                                                                                                                                                                                                                                                                                                                                                                                                                                                                                                                                                                                                                                                                                                                                                                                                                                                                                                                                                                                                                                                                                                                                                                                                                                                                                                                                                                                                                                                                                                                                                                                                                                                                                                                                                                                                                                                                                                                                                                                                                                                                                                                                                                                                                                                                                                                                                                                                                                                                                                                                                                                                                                                                                                                                                                                                                                                                                                                                                                                                                                                                                                                                                                                                                                                                                                                                                                                                                                                                                                                                                                                                                                                                                                                                                                                                                                                                                                                                                                                                                                                                                                                                                                                                                                                                                                                                                                                                                                                                                                                                                                                                                                                                                                                                                                                                                                                                                                                                                                                                                                                                                                                                                                                                                                                                                                                                                                                                                                                                                                                                                                                                                                                                                                                                                                                                                                                                                                                                                                                                                                                                                                                                                                                                                                                                                                                                                                                                                                                                                                                                                                                                                                                                                                                                                                                                                                                                                                                                                                                                                                                                                                                                                                                                                                                                                                                                                                                                                                                                                                                                                                                                                                                                                                                                                                                                                                                                                                                                                                                                                                                                                                                                                                                                                                                                                                                                                                                                                                                                                                                                                                                                                                                                                                                                                                                                                                                                                                                                                                                                                                                                                                                                                                                                                                                                                                                                                                                                                                                                                                     | Lister Laboratorio de Referencia S.A. de C.V.               | Instituto de diagnostico y Referencia Epidemiologicos (INDRE) Departamento de Virología                                                           | Abril Rodriguez-Maldonado; Claudia Wong-Arambula; Ernesto Ramirez-Gonzalez.; Fabiola Garcés-Ayala; Gisela Barrera-Badillo; Irma Lopez-Martinez; Lucia Hernandez-Rivas; Natividad Cruz-Ortiz; Tatiana Nunez-Garcia                                                                                                                                                                                                                                                                                                                                                                                                                                                                                                                                                                                                                                                                                                                                                                                                                                                                                                                                                                                                                                                                                                                                                                                                                                                                                                                                                                                |
| EPI_ISL_2566355                                                                                                                                                                                                                                                                                                                                                                                                                                                                                                                                                                                                                                                                                                                                                                                                                                                                                                                                                                                                                                                                                                                                                                                                                                                                                                                                                                                                                                                                                                                                                                                                                                                                                                                                                                                                                                                                                                                                                                                                                                                                                                                                                                                                                                                                                                                                                                                                                                                                                                                                                                                                                                                                                                                                                                                                                                                                                                                                                                                                                                                                                                                                                                                                                                                                                                                                                                                                                                                                                                                                                                                                                                                                                                                                                                                                                                                                                                                                                                                                                                                                                                                                                                                                                                                                                                                                                                                                                                                                                                                                                                                                                                                                                                                                                                                                                                                                                                                                                                                                                                                                                                                                                                                                                                                                                                                                                                                                                                                                                                                                                                                                                                                                                                                                                                                                                                                                                                                                                                                                                                                                                                                                                                                                                                                                                                                                                                                                                                                                                                                                                                                                                                                                                                                                                                                                                                                                                                                                                                                                                                                                                                                                                                                                                                                                                                                                                                                                                                                                                                                                                                                                                                                                                                                                                                                                                                                                                                                                                                                                                                                                                                                                                                                                                                                                                                                                                                                                                                                                                                                                                                                                                                                                                                                                                                                                                                                                                                                                                                                                                                                                                                                                                                                                                                                                                                                                                                                                                                                                                                                                                                                                                                                                                                                                                     | Operation Infectious Diseases, Naval Health Research Center | Operation Infectious Diseases, Naval Health Research Center                                                                                       | A.E.; Balansy-Ames; C.A.; Fierro, M.; Iniguez-Stevens, E.; Kriner, P.; M.S.; Moser, K.; Myers; Pan; Phippard; R.S.; R.W.; Underwood                                                                                                                                                                                                                                                                                                                                                                                                                                                                                                                                                                                                                                                                                                                                                                                                                                                                                                                                                                                                                                                                                                                                                                                                                                                                                                                                                                                                                                                              |
| EPI_ISL_1661549                                                                                                                                                                                                                                                                                                                                                                                                                                                                                                                                                                                                                                                                                                                                                                                                                                                                                                                                                                                                                                                                                                                                                                                                                                                                                                                                                                                                                                                                                                                                                                                                                                                                                                                                                                                                                                                                                                                                                                                                                                                                                                                                                                                                                                                                                                                                                                                                                                                                                                                                                                                                                                                                                                                                                                                                                                                                                                                                                                                                                                                                                                                                                                                                                                                                                                                                                                                                                                                                                                                                                                                                                                                                                                                                                                                                                                                                                                                                                                                                                                                                                                                                                                                                                                                                                                                                                                                                                                                                                                                                                                                                                                                                                                                                                                                                                                                                                                                                                                                                                                                                                                                                                                                                                                                                                                                                                                                                                                                                                                                                                                                                                                                                                                                                                                                                                                                                                                                                                                                                                                                                                                                                                                                                                                                                                                                                                                                                                                                                                                                                                                                                                                                                                                                                                                                                                                                                                                                                                                                                                                                                                                                                                                                                                                                                                                                                                                                                                                                                                                                                                                                                                                                                                                                                                                                                                                                                                                                                                                                                                                                                                                                                                                                                                                                                                                                                                                                                                                                                                                                                                                                                                                                                                                                                                                                                                                                                                                                                                                                                                                                                                                                                                                                                                                                                                                                                                                                                                                                                                                                                                                                                                                                                                                                                                     | PEMEX                                                       | Instituto de Diagnostico y Referencia Epidemiologicos (INDRE)                                                                                     | Abril Rodriguez-Maldonado; Ariadna Medina-Benitez; Claudia Wong-Arambula; Ernesto Ramirez-Gonzalez.; Gisela Barrera-Badillo; Irma Lopez-Martinez; Joaquin Quiroz-Mercado; Lucia Hernandez-Rivas; Natividad Cruz-Ortiz; Sergio Rangel-Guerrero; Tatiana Nunez-Garcia; Vanessa Rivero-Arredondo                                                                                                                                                                                                                                                                                                                                                                                                                                                                                                                                                                                                                                                                                                                                                                                                                                                                                                                                                                                                                                                                                                                                                                                                                                                                                                    |
| EPI_ISL_2105738, EPI_ISL_2105742, EPI_ISL_2105743, EPI_ISL_2105744, EPI_ISL_2105745, EPI_ISL_2105746, EPI_ISL_2105747, EPI_ISL_2105748, EPI_ISL_2105749, EPI_ISL_2105750, EPI_ISL_2105751, EPI_ISL_2105752, EPI_ISL_2105753, EPI_ISL_2105754, EPI_ISL_2105755, EPI_ISL_2105756, EPI_ISL_2105758, EPI_ISL_2105759, EPI_ISL_2105760, EPI_ISL_2105761, EPI_ISL_2105762, EPI_ISL_2105763, EPI_ISL_2105764, EPI_ISL_2105767, EPI_ISL_2105768, EPI_ISL_2105769, EPI_ISL_2105770, EPI_ISL_2105771, EPI_ISL_2105772, EPI_ISL_2105773, EPI_ISL_2105774, EPI_ISL_2105775, EPI_ISL_2105776, EPI_ISL_2105777, EPI_ISL_2105778, EPI_ISL_2105779, EPI_ISL_2105780, EPI_ISL_2105781, EPI_ISL_2105782, EPI_ISL_2105783, EPI_ISL_2105784, EPI_ISL_2105786, EPI_ISL_2105788, EPI_ISL_2105789, EPI_ISL_2105790, EPI_ISL_2105791, EPI_ISL_2105792, EPI_ISL_2105793, EPI_ISL_2105794, EPI_ISL_2105795, EPI_ISL_2105796, EPI_ISL_2105797, EPI_ISL_2105798, EPI_ISL_2105799, EPI_ISL_2105800, EPI_ISL_2105801, EPI_ISL_2105802, EPI_ISL_2105803, EPI_ISL_2105804, EPI_ISL_2105805, EPI_ISL_2105806, EPI_ISL_2105807, EPI_ISL_2105808, EPI_ISL_2105809, EPI_ISL_2105810, EPI_ISL_2105811, EPI_ISL_2105812, EPI_ISL_2105813, EPI_ISL_2105815, EPI_ISL_2105818, EPI_ISL_2105819, EPI_ISL_2105820, EPI_ISL_2105821, EPI_ISL_2105822, EPI_ISL_2105823, EPI_ISL_2105824, EPI_ISL_2105825, EPI_ISL_2105827, EPI_ISL_2105828, EPI_ISL_2105829, EPI_ISL_2105830, EPI_ISL_2105831, EPI_ISL_2105832, EPI_ISL_2105833, EPI_ISL_2105834, EPI_ISL_2105835, EPI_ISL_2105836, EPI_ISL_2105837, EPI_ISL_2105838, EPI_ISL_2105839, EPI_ISL_2105840, EPI_ISL_2105841, EPI_ISL_2105842, EPI_ISL_2105843, EPI_ISL_2105844, EPI_ISL_2105845, EPI_ISL_2105846, EPI_ISL_2105847, EPI_ISL_2105848, EPI_ISL_2105849, EPI_ISL_2105850, EPI_ISL_2105851, EPI_ISL_2105852, EPI_ISL_2105853, EPI_ISL_2105854, EPI_ISL_2105855, EPI_ISL_2105856, EPI_ISL_2105857, EPI_ISL_2105858, EPI_ISL_2105859, EPI_ISL_2105860, EPI_ISL_2105861, EPI_ISL_2105862, EPI_ISL_2105863, EPI_ISL_2105864, EPI_ISL_2105865, EPI_ISL_2105866, EPI_ISL_2105867, EPI_ISL_2105868, EPI_ISL_2105869, EPI_ISL_2105870, EPI_ISL_2105872, EPI_ISL_2105873, EPI_ISL_2105874, EPI_ISL_2105875, EPI_ISL_2105876, EPI_ISL_2105877, EPI_ISL_2105878, EPI_ISL_2105879, EPI_ISL_2105880, EPI_ISL_2105881, EPI_ISL_2105882, EPI_ISL_2105883, EPI_ISL_2105884, EPI_ISL_2105885, EPI_ISL_2105886, EPI_ISL_2105887, EPI_ISL_2105888, EPI_ISL_2105889, EPI_ISL_2105890, EPI_ISL_2105891, EPI_ISL_2105892, EPI_ISL_2105893, EPI_ISL_2105894, EPI_ISL_2105895, EPI_ISL_2105896, EPI_ISL_2105897, EPI_ISL_2105898, EPI_ISL_2105899, EPI_ISL_2105900, EPI_ISL_2105901, EPI_ISL_2105902, EPI_ISL_2105903, EPI_ISL_2105904, EPI_ISL_2105905, EPI_ISL_2105906, EPI_ISL_2105907, EPI_ISL_2105908, EPI_ISL_2105909, EPI_ISL_2105910, EPI_ISL_2105911, EPI_ISL_2105912, EPI_ISL_2105913, EPI_ISL_2105914, EPI_ISL_2105915, EPI_ISL_2105916, EPI_ISL_2105917, EPI_ISL_2105918, EPI_ISL_2105919, EPI_ISL_2105920, EPI_ISL_2105921, EPI_ISL_2105922, EPI_ISL_2105923, EPI_ISL_2105924, EPI_ISL_2105925, EPI_ISL_2105926, EPI_ISL_2105927, EPI_ISL_2105928, EPI_ISL_2105929, EPI_ISL_2105930, EPI_ISL_2105931, EPI_ISL_2105932, EPI_ISL_2105933, EPI_ISL_2105934, EPI_ISL_2105935, EPI_ISL_2105936, EPI_ISL_2105937, EPI_ISL_2105938, EPI_ISL_2105939, EPI_ISL_2105940, EPI_ISL_2105941, EPI_ISL_2105942, EPI_ISL_2105943, EPI_ISL_2105944, EPI_ISL_2105945, EPI_ISL_2105946, EPI_ISL_2105947, EPI_ISL_2105948, EPI_ISL_2105949, EPI_ISL_2105950, EPI_ISL_2105951, EPI_ISL_2105952, EPI_ISL_2105953, EPI_ISL_2105954, EPI_ISL_2105955, EPI_ISL_2105956, EPI_ISL_2105957, EPI_ISL_2105958, EPI_ISL_2105959, EPI_ISL_2105960, EPI_ISL_2105961, EPI_ISL_2105962, EPI_ISL_2105963, EPI_ISL_2105964, EPI_ISL_2105965, EPI_ISL_2105966, EPI_ISL_2105967, EPI_ISL_2105968, EPI_ISL_2105969, EPI_ISL_2105970, EPI_ISL_2105971, EPI_ISL_2105972, EPI_ISL_2105973, EPI_ISL_2105974, EPI_ISL_2105975, EPI_ISL_2105976, EPI_ISL_2105977, EPI_ISL_2105978, EPI_ISL_2105979, EPI_ISL_2105980, EPI_ISL_2105981, EPI_ISL_2105982, EPI_ISL_2105983, EPI_ISL_2105984, EPI_ISL_2105985, EPI_ISL_2105986, EPI_ISL_2105987, EPI_ISL_2105988, EPI_ISL_2105989, EPI_ISL_2105990, EPI_ISL_2105991, EPI_ISL_2105992, EPI_ISL_2105993, EPI_ISL_2105994, EPI_ISL_2105995, EPI_ISL_2105996, EPI_ISL_2105997, EPI_ISL_2105998, EPI_ISL_2105999, EPI_ISL_2106000, EPI_ISL_2106001, EPI_ISL_2106002, EPI_ISL_2106003, EPI_ISL_2106004, EPI_ISL_2106005, EPI_ISL_2106006, EPI_ISL_2106007, EPI_ISL_2106008, EPI_ISL_2106009, EPI_ISL_2106010, EPI_ISL_2106011, EPI_ISL_2106012, EPI_ISL_2106013, EPI_ISL_2106014, EPI_ISL_2106015, EPI_ISL_2106016, EPI_ISL_2106017, EPI_ISL_2106018, EPI_ISL_2106019, EPI_ISL_2106020, EPI_ISL_2106021, EPI_ISL_2106022, EPI_ISL_2106023, EPI_ISL_2106024, EPI_ISL_2106025, EPI_ISL_2106026, EPI_ISL_2106027, EPI_ISL_2106028, EPI_ISL_2106029, EPI_ISL_2106030, EPI_ISL_2106031, EPI_ISL_2106032, EPI_ISL_2106033, EPI_ISL_2106034, EPI_ISL_2106035, EPI_ISL_2106036, EPI_ISL_2106037, EPI_ISL_2106038, EPI_ISL_2106039, EPI_ISL_2106040, EPI_ISL_2106041, EPI_ISL_2106042, EPI_ISL_2106043, EPI_ISL_2106044, EPI_ISL_2106045, EPI_ISL_2106046, EPI_ISL_2106047, EPI_ISL_2106048, EPI_ISL_2106049, EPI_ISL_2106050, EPI_ISL_2106051, EPI_ISL_2106052, EPI_ISL_2106053, EPI_ISL_2106054, EPI_ISL_2106055, EPI_ISL_2106056, EPI_ISL_2106057, EPI_ISL_2106058, EPI_ISL_2106059, EPI_ISL_2106060, EPI_ISL_2106061, EPI_ISL_2106062, EPI_ISL_2106063, EPI_ISL_2106064, EPI_ISL_2106065, EPI_ISL_2106066, EPI_ISL_2106067, EPI_ISL_2106068, EPI_ISL_2106069, EPI_ISL_2106070, EPI_ISL_2106071, EPI_ISL_2106072, EPI_ISL_2106073, EPI_ISL_2106074, EPI_ISL_2106075, EPI_ISL_2106076, EPI_ISL_2106077, EPI_ISL_2106078, EPI_ISL_2106079, EPI_ISL_2106080, EPI_ISL_2106081, EPI_ISL_2106082, EPI_ISL_2106083, EPI_ISL_2106084, EPI_ISL_2106085, EPI_ISL_2106086, EPI_ISL_2106087, EPI_ISL_2106088, EPI_ISL_2106089, EPI_ISL_2106090, EPI_ISL_2106091, EPI_ISL_2106092, EPI_ISL_2106093, EPI_ISL_2106094, EPI_ISL_2106095, EPI_ISL_2106096, EPI_ISL_2106097, EPI_ISL_2106098, EPI_ISL_2106099, EPI_ISL_2106100, EPI_ISL_2106101, EPI_ISL_2106102, EPI_ISL_2106103, EPI_ISL_2106104, EPI_ISL_2106105, EPI_ISL_2106106, EPI_ISL_2106107, EPI_ISL_2106108, EPI_ISL_2106109, EPI_ISL_2106110, EPI_ISL_2106111, EPI_ISL_2106112, EPI_ISL_2106113, EPI_ISL_2106114, EPI_ISL_2106115, EPI_ISL_2106116, EPI_ISL_2106117, EPI_ISL_2106118, EPI_ISL_2106119, EPI_ISL_2106120, EPI_ISL_2106121, EPI_ISL_2106122, EPI_ISL_2106123, EPI_ISL_2106124, EPI_ISL_2106125, EPI_ISL_2106126, EPI_ISL_2106127, EPI_ISL_2106128, EPI_ISL_2106129, EPI_ISL_2106130, EPI_ISL_2106131, EPI_ISL_2106132, EPI_ISL_2106133, EPI_ISL_2106134, EPI_ISL_2106135, EPI_ISL_2106136, EPI_ISL_2106137, EPI_ISL_2106138, EPI_ISL_2106139, EPI_ISL_2106140, EPI_ISL_2106141, EPI_ISL_2106142, EPI_ISL_2106143, EPI_ISL_2106144, EPI_ISL_2106145, EPI_ISL_2106146, EPI_ISL_2106147, EPI_ISL_2106148, EPI_ISL_2106149, EPI_ISL_2106150, EPI_ISL_2106151, EPI_ISL_2106152, EPI_ISL_2106153, EPI_ISL_2106154, EPI_ISL_2106155, EPI_ISL_2106156, EPI_ISL_2106157, EPI_ISL_2106158, EPI_ISL_2106159, EPI_ISL_2106160, EPI_ISL_2106161, EPI_ISL_2106162, EPI_ISL_2106163, EPI_ISL_2106164, EPI_ISL_2106165, EPI_ISL_2106166, EPI_ISL_2106167, EPI_ISL_2106168, EPI_ISL_2106169, EPI_ISL_2106170, EPI_ISL_2106171, EPI_ISL_2106172, EPI_ISL_2106173, EPI_ISL_2106174, EPI_ISL_2106175, EPI_ISL_2106176, EPI_ISL_2106177, EPI_ISL_2106178, EPI_ISL_2106179, EPI_ISL_2106180, EPI_ISL_2106181, EPI_ISL_2106182, EPI_ISL_2106183, EPI_ISL_2106184, EPI_ISL_2106185, EPI_ISL_2106186, EPI_ISL_2106187, EPI_ISL_2106188, EPI_ISL_2106189, EPI_ISL_2106190, EPI_ISL_2106191, EPI_ISL_2106192, EPI_ISL_2106193, EPI_ISL_2106194, EPI_ISL_2106195, EPI_ISL_2106196, EPI_ISL_2106197, EPI_ISL_2106198, EPI_ISL_2106199, EPI_ISL_2106200, EPI_ISL_2106201, EPI_ISL_2106202, EPI_ISL_2106203, EPI_ISL_2106204, EPI_ISL_2106205, EPI_ISL_2106206, EPI_ISL_2106207, EPI_ISL_2106208, EPI_ISL_2106209, EPI_ISL_2106210, EPI_ISL_2106211, EPI_ISL_2106212, EPI_ISL_2106213, EPI_ISL_2106214, EPI_ISL_2106215, EPI_ISL_2106216, EPI_ISL_2106217, EPI_ISL_2106218, EPI_ISL_2106219, EPI_ISL_2106220, EPI_ISL_2106221, EPI_ISL_2106222, EPI_ISL_2106223, EPI_ISL_2106224, EPI_ISL_2106225, EPI_ISL_2106226, EPI_ISL_2106227, EPI_ISL_2106228, EPI_ISL_2106229, EPI_ISL_2106230, EPI_ISL_2106231, EPI_ISL_2106232, EPI_ISL_2106233, EPI_ISL_2106234, EPI_ISL_2106235, EPI_ISL_2106236, EPI_ISL_2106237, EPI_ISL_2106238, EPI_ISL_2106239, EPI_ISL_2106240, EPI_ISL_2106241, EPI_ISL_2106242, EPI_ISL_2106243, EPI_ISL_2106244, EPI_ISL_2106245, EPI_ISL_2106246, EPI_ISL_2106247, EPI_ISL_2106248, EPI_ISL_2106249, EPI_ISL_2106250, EPI_ISL_2106251, EPI_ISL_2106252, EPI_ISL_2106253, EPI_ISL_2106254, EPI_ISL_2106255, EPI_ISL_2106256, EPI_ISL_2106257, EPI_ISL_2106258, EPI_ISL_2106259, EPI_ISL_2106260, EPI_ISL_2106261, EPI_ISL_2106262, EPI_ISL_2106263, EPI_ISL_2106264, EPI_ISL_2106265, EPI_ISL_2106266, EPI_ISL_2106267, EPI_ISL_2106268, EPI_ISL_2106269, EPI_ISL_2106270, EPI_ISL_2106271, EPI_ISL_2106272, EPI_ISL_2106273, EPI_ISL_2106274, EPI_ISL_2106275, EPI_ISL_2106276, EPI_ISL_2106277, EPI_ISL_2106278, EPI_ISL_2106279, EPI_ISL_2106280, EPI_ISL_2106281, EPI_ISL_2106282, EPI_ISL_2106283, EPI_ISL_2106284, EPI_ISL_2106285, EPI_ISL_2106286, EPI_ISL_2106287, EPI_ISL_2106288, EPI_ISL_2106289, EPI_ISL_2106290, EPI_ISL_2106291, EPI_ISL_2106292, EPI_ISL_2106293, EPI_ISL_2106294, EPI_ISL_2106295, EPI_ISL_2106296, EPI_ISL_2106297, EPI_ISL_2106298, EPI_ISL_2106299, EPI_ISL_2106300, EPI_ISL_2106301, EPI_ISL_2106 |                                                             |                                                                                                                                                   |                                                                                                                                                                                                                                                                                                                                                                                                                                                                                                                                                                                                                                                                                                                                                                                                                                                                                                                                                                                                                                                                                                                                                                                                                                                                                                                                                                                                                                                                                                                                                                                                  |



EPI\_ISL\_1279282, EPI\_ISL\_1279440, EPI\_ISL\_1279604, EPI\_ISL\_1279605, EPI\_ISL\_1279606, EPI\_ISL\_1279608, EPI\_ISL\_1279609, EPI\_ISL\_1279610, EPI\_ISL\_1279612, EPI\_ISL\_1279613, EPI\_ISL\_1279614, EPI\_ISL\_1585428, EPI\_ISL\_1585429, EPI\_ISL\_1585432, EPI\_ISL\_1585433, EPI\_ISL\_1585434, EPI\_ISL\_1585435, EPI\_ISL\_1585436, EPI\_ISL\_1585438, EPI\_ISL\_1585439, EPI\_ISL\_1585440, EPI\_ISL\_1585441, EPI\_ISL\_1585443, EPI\_ISL\_1585444, EPI\_ISL\_1585447, EPI\_ISL\_1585448, EPI\_ISL\_1585449, EPI\_ISL\_1585450, EPI\_ISL\_1585451, EPI\_ISL\_1585452, EPI\_ISL\_1585453, EPI\_ISL\_1585454

see above  
Unidad de Investigación Médica de Yucatán (UIMY) Instituto Nacional de Enfermedades Respiratorias (INER): Centro de Investigación en Enfermedades Infecciosas (CIENI)  
Alejandro Sanchez-Flores; Alfredo Herrera-Estrella; Alicia Ocaña-Mondragón; Angel Gustavo Salas-Lais; Bernardo Martínez-Miguel; Blanca Taboada; Brenda Irasema Maldonado-Meza; Carla Ivón Herrera-Najera; Carlos F. Arias; Celia Boukadida; Clara Esperanza Santacruz-Tinoco; Concepción Grajales-Muñiz; Consorcio Mexicano de Vigilancia Genómica (CoViGen-Mex). Authors (in alphabetical order): Julio Elias Alvarado-Yaah; Consorcio Mexicano de Vigilancia Genómica (CoViGen-Mex). Authors (in alphabetical order): Julio Elias Alvarado-Yaah; Célida Duque Molina; Fernando Fontove-Herrera; Francisco Pulido; Gloria Elena Espinosa-Ayala; Gloria Elena Espinoza-Ayala; Gloria María Molina-Salinas; Gloria Vazquez; Hector Esteban Paz-Juárez; Hector Montoya-Fuentes; Helen Haydee Fernanda Ramírez-Plascencia; Jorge Ivan Salinal-Navarez; José Antonio Enciso-Moreno; José Esteban Muñoz-Medina; José de Jesús Nuñez-Contreras; Juan Bautista Chale-Dzul; Luis Alberto Ochoa-Carrera; Margarita Matias-Florentino; María Guadalupe Santiago-Mauricio; María Guadalupe de Jesús Mireles-Rivera; Nelly Sélem-Mojica; Pavel Isa; Ricardo Grande; Santiago Avila-Rios; Victor Eduardo García-Arias; Victor Hugo Borja-Aburto

EPI\_ISL\_2391512, EPI\_ISL\_2391537, EPI\_ISL\_2391720, EPI\_ISL\_2391728, EPI\_ISL\_2681050, EPI\_ISL\_2681088, EPI\_ISL\_2681094, EPI\_ISL\_2681098, EPI\_ISL\_2681099, EPI\_ISL\_2681106, EPI\_ISL\_2681108, EPI\_ISL\_2681115, EPI\_ISL\_2681118, EPI\_ISL\_2681133, EPI\_ISL\_2681136, EPI\_ISL\_2681176, EPI\_ISL\_2681233, EPI\_ISL\_2681274, EPI\_ISL\_2681300, EPI\_ISL\_2681311, EPI\_ISL\_2681328, EPI\_ISL\_2681341, EPI\_ISL\_2681351, EPI\_ISL\_2681368, EPI\_ISL\_2681370, EPI\_ISL\_2681372, EPI\_ISL\_2681374, EPI\_ISL\_2681375, EPI\_ISL\_2681378, EPI\_ISL\_2801564, EPI\_ISL\_2801566, EPI\_ISL\_2801577, EPI\_ISL\_2801579, EPI\_ISL\_2801583, EPI\_ISL\_2801584, EPI\_ISL\_2801585, EPI\_ISL\_2801592, EPI\_ISL\_2801594, EPI\_ISL\_2801598, EPI\_ISL\_2801600, EPI\_ISL\_2801601, EPI\_ISL\_2801602, EPI\_ISL\_2801612, EPI\_ISL\_2801616, EPI\_ISL\_2801619, EPI\_ISL\_2801626, EPI\_ISL\_2801632, EPI\_ISL\_2801633, EPI\_ISL\_2801634, EPI\_ISL\_2801641, EPI\_ISL\_2801645, EPI\_ISL\_2801646, EPI\_ISL\_2801647, EPI\_ISL\_2801649, EPI\_ISL\_2801651, EPI\_ISL\_2801652, EPI\_ISL\_2801653, EPI\_ISL\_2801655

see above  
Unidad de Investigación Médica de Yucatán (UIMY) Instituto de Biotecnología de la UNAM ; Alejandra García-Gasca; Alejandra García-Gasca; Alejandra Hernández-Terán; Alejandro Sanchez-Flores; Alejandro Sánchez-Flores; Alfredo Herrera-Estrella; Alicia Ocaña-Mondragón; Andreu Comas-García; Angel Gustavo Salas-Lais; Antonio Loza Román; Bernardo Martínez-Miguel; Blanca Taboada; Brenda Irasema Maldonado-Meza; Bruno Gomez-Gil; Bruno Gómez-Gil; Carla Ivón Herrera-Najera; Carlos F. Arias; Celia Boukadida; Clara Esperanza Santacruz-Tinoco; Concepción Grajales-Muñiz; Consorcio Mexicano de Vigilancia Genómica (CoViGen-Mex). Authors (in alphabetical order): Julio Elias Alvarado-Yaah; Cristóbal Cháidez-Quiróz; Célida Duque Molina; Célida Martínez- Rodríguez; Daniel Fregoso-Rueda; Daniel Lira Morales; Eduardo Becerril-Vargas; Fernando Fontove-Herrera; Fidencio Mejía-Nepomuceno; Francisco Pulido; Gloria Elena Espinosa-Ayala; Gloria María Molina-Salinas; Gloria Vazquez; Hector Esteban Paz-Juárez; Hector Montoya-Fuentes; Helen Haydee Fernanda Ramírez-Plascencia; Irvin González-López; Jean Pierre González; Jesús Hernández; Joel Armando Vázquez-Pérez.; Jorge Salas-Hernández; José Antonio Enciso-Moreno; José Arturo Martínez-Orozco; José Esteban Muñoz-Medina; José de Jesús Nuñez-Contreras; Juan Bautista Chale-Dzul; Julissa Enciso-Ibarra; Luis Alberto Ochoa-Carrera; Margarita Matias-Florentino; Mario Mújica-Sánchez; Marissa Perez-García; María Guadalupe Santiago-Mauricio; María Guadalupe de Jesús Mireles-Rivera; Nelly Sélem-Mojica; Pavel Isa; Ricardo Ciria Merce; Ricardo Grande; Rosa María Gutiérrez Rios; Rosa María Gutiérrez Rios; Santiago Avila-Rios; Selene Zárate; Susana Lopez; Verónica Mata-Haro; Victor Eduardo García-Arias; Victor Eduardo García-Arias; Victor Hugo Borja-Aburto

EPI\_ISL\_2402015, EPI\_ISL\_2402016, EPI\_ISL\_2402017, EPI\_ISL\_2402018, EPI\_ISL\_2402019, EPI\_ISL\_2402021, EPI\_ISL\_2402023, EPI\_ISL\_2402024, EPI\_ISL\_2402025, EPI\_ISL\_2402026, EPI\_ISL\_2402027, EPI\_ISL\_2402028, EPI\_ISL\_2402029, EPI\_ISL\_2402030, EPI\_ISL\_2402031, EPI\_ISL\_2402032, EPI\_ISL\_2402034, EPI\_ISL\_2402035, EPI\_ISL\_2402036, EPI\_ISL\_2402037, EPI\_ISL\_2402040, EPI\_ISL\_2402041, EPI\_ISL\_2402042, EPI\_ISL\_2402045, EPI\_ISL\_2402047, EPI\_ISL\_2402048, EPI\_ISL\_2402049, EPI\_ISL\_2402050, EPI\_ISL\_2402051, EPI\_ISL\_2402052, EPI\_ISL\_2402053, EPI\_ISL\_2402054, EPI\_ISL\_2402055, EPI\_ISL\_2402056, EPI\_ISL\_2402058, EPI\_ISL\_2402060, EPI\_ISL\_2402061, EPI\_ISL\_2402063, EPI\_ISL\_2402064, EPI\_ISL\_2402065

see above  
Unidad de Investigación Médica de Yucatán (UIMY) Unidad de Genómica Avanzada Alejandro Sanchez-Flores; Alfredo Herrera-Estrella; Alicia Ocaña-Mondragón; Angel Gustavo Salas-Lais; Bernardo Martínez-Miguel; Blanca Taboada; Brenda Irasema Maldonado-Meza; Carla Ivon Herrera-Najera; Carlos F. Arias; Celia Boukadida; Clara Esperanza Santacruz-Tinoco; Concepcion Grajales-Muniz; Consorcio Mexicano de Vigilancia Genómica (CoViGen-Mex). Authors (in alphabetical order): Julio Elias Alvarado-Yaah; Fernando Fontove-Herrera; Francisco Pulido; Gloria Elena Espinoza-Ayala; Gloria María Molina-Salinas; Gloria Vazquez; Hector Esteban Paz-Juarez; Hector Montoya-Fuentes; Helen Haydee Fernanda Ramirez-Plascencia; Jorge Ivan Salinal-Navarez; Jose Antonio Enciso-Moreno; Jose Esteban Munoz-Medina; Jose de Jesus Nunez-Contreras; Juan Bautista Chale-Dzul; Luis Alberto Ochoa-Carrera; Margarita Matias-Florentino; María Guadalupe Santiago-Mauricio; María Guadalupe de Jesus Mireles-Rivera; Nelly Selem-Mojica; Pavel Isa; Ricardo Grande; Santiago Avila-Rios; Victor Hugo Borja-Aburto

EPI\_ISL\_1423505  
Unidad de Patología Clínica Instituto de Diagnostico y Referencia Epidemiológicos (INDRE) Abril Rodriguez-Maldonado; Ariadna Medina-Benitez; Claudia Wong-Arambula; Ernesto Ramirez-Gonzalez.; Gisela Barrera-Badillo; Irma Lopez-Martinez; Joaquin Quiroz-Mercado; Lucia Hernandez-Rivas; Natividad Cruz-Ortiz; Sergio Rangel-Guerrero; Tatiana Nunez-Garcia; Vanessa Rivero-Arredondo

EPI\_ISL\_3023790, EPI\_ISL\_3023803, EPI\_ISL\_3023804, EPI\_ISL\_3023805, EPI\_ISL\_3023806, EPI\_ISL\_3023807, EPI\_ISL\_3023808, EPI\_ISL\_3023810, EPI\_ISL\_3023811, EPI\_ISL\_3023812, EPI\_ISL\_3023813, EPI\_ISL\_3023814, EPI\_ISL\_3023815, EPI\_ISL\_3023816, EPI\_ISL\_3023817, EPI\_ISL\_3023818, EPI\_ISL\_3023819, EPI\_ISL\_3023820, EPI\_ISL\_3023821, EPI\_ISL\_3023822, EPI\_ISL\_3023826, EPI\_ISL\_3023828, EPI\_ISL\_3023862, EPI\_ISL\_3023864, EPI\_ISL\_3023867, EPI\_ISL\_3023871, EPI\_ISL\_3023872, EPI\_ISL\_3023873, EPI\_ISL\_3023874, EPI\_ISL\_3023875, EPI\_ISL\_3023876, EPI\_ISL\_3023877, EPI\_ISL\_3023879, EPI\_ISL\_3023880, EPI\_ISL\_3023881, EPI\_ISL\_3023882, EPI\_ISL\_3023883, EPI\_ISL\_3023888, EPI\_ISL\_3023890, EPI\_ISL\_3023891, EPI\_ISL\_3023892, EPI\_ISL\_3023893, EPI\_ISL\_3023894, EPI\_ISL\_3023896, EPI\_ISL\_3023897, EPI\_ISL\_3023898, EPI\_ISL\_3023899, EPI\_ISL\_3023902, EPI\_ISL\_3023903, EPI\_ISL\_3023904, EPI\_ISL\_3023905, EPI\_ISL\_3023906, EPI\_ISL\_3023908, EPI\_ISL\_3023909, EPI\_ISL\_3023911, EPI\_ISL\_3023913, EPI\_ISL\_3023914, EPI\_ISL\_3023915, EPI\_ISL\_3023916, EPI\_ISL\_3023917, EPI\_ISL\_3023920, EPI\_ISL\_3023921, EPI\_ISL\_3023922, EPI\_ISL\_3023924, EPI\_ISL\_3023926, EPI\_ISL\_3023927, EPI\_ISL\_3023928, EPI\_ISL\_3023929, EPI\_ISL\_3023933, EPI\_ISL\_3023934, EPI\_ISL\_3023935, EPI\_ISL\_3023936, EPI\_ISL\_3023937, EPI\_ISL\_3023938, EPI\_ISL\_3023939, EPI\_ISL\_3023940, EPI\_ISL\_3023941, EPI\_ISL\_3023943, EPI\_ISL\_3023944, EPI\_ISL\_3023945, EPI\_ISL\_3023946, EPI\_ISL\_3023947, EPI\_ISL\_3023948, EPI\_ISL\_3023965, EPI\_ISL\_3023966, EPI\_ISL\_3023970, EPI\_ISL\_3023971, EPI\_ISL\_3023972, EPI\_ISL\_3023973, EPI\_ISL\_3023974, EPI\_ISL\_3023975, EPI\_ISL\_3023976, EPI\_ISL\_3023977, EPI\_ISL\_3023978, EPI\_ISL\_3023982, EPI\_ISL\_3023983, EPI\_ISL\_3023985, EPI\_ISL\_3023988, EPI\_ISL\_3023989, EPI\_ISL\_3023990, EPI\_ISL\_3023992, EPI\_ISL\_3023993, EPI\_ISL\_3023995, EPI\_ISL\_3023996, EPI\_ISL\_3023998, EPI\_ISL\_3023999, EPI\_ISL\_3024005, EPI\_ISL\_3024006, EPI\_ISL\_3024008, EPI\_ISL\_3024010, EPI\_ISL\_3024012, EPI\_ISL\_3024014, EPI\_ISL\_3024018, EPI\_ISL\_3024019, EPI\_ISL\_3024020, EPI\_ISL\_3024022, EPI\_ISL\_3024023, EPI\_ISL\_3024024, EPI\_ISL\_3024029, EPI\_ISL\_3024031, EPI\_ISL\_3024034, EPI\_ISL\_3024035, EPI\_ISL\_3024038, EPI\_ISL\_3024040, EPI\_ISL\_3024043, EPI\_ISL\_3024044, EPI\_ISL\_3024045, EPI\_ISL\_3024046, EPI\_ISL\_3024047, EPI\_ISL\_3024053, EPI\_ISL\_3024056, EPI\_ISL\_3024059, EPI\_ISL\_3024064, EPI\_ISL\_3024067, EPI\_ISL\_3024072, EPI\_ISL\_3024073, EPI\_ISL\_3024075, EPI\_ISL\_3024077, EPI\_ISL\_3024078, EPI\_ISL\_3024081

see above  
Universidad Autónoma de Yucatan New York Genome Center Amy Baldwin; Andre Corvelo; Aviles-Gomez E; Ayora-Talavera G; Chan-Gasca M; Dayna M. Oschwald; Flores-Quintal F; Granja-Perez P; Lopez-Coral L.; Michael Zody; Samantha Fennessey; Tom Maniatis; Villanueva-Jorge S; Yam-Pool E
